# Supplementary material for: Dynamic regulation of inter-organelle communication by ubiquitylation controls skeletal muscle development and disease onset
Source: eLife journal article supplement (doi:10.7554/elife.81966), 2023-07-07
Supplement: fig1-figsupp1-data4 [file elife-81966-fig1-figsupp1-data4-v2.pdf]

# Figure 1-figure supplement 1-source data 4

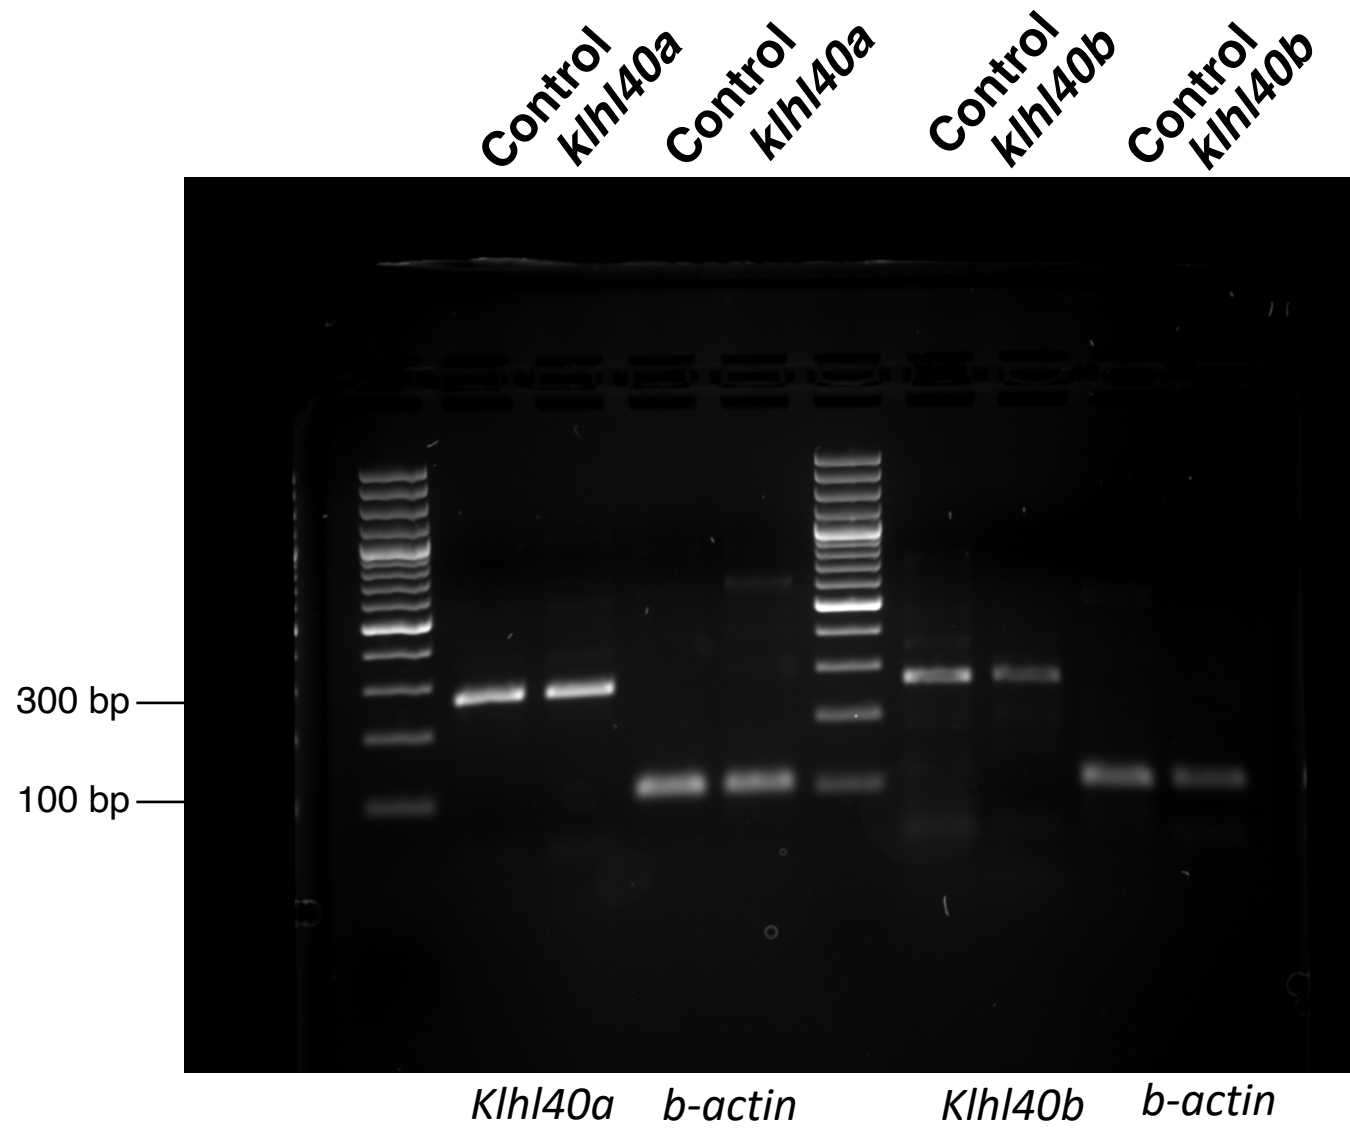

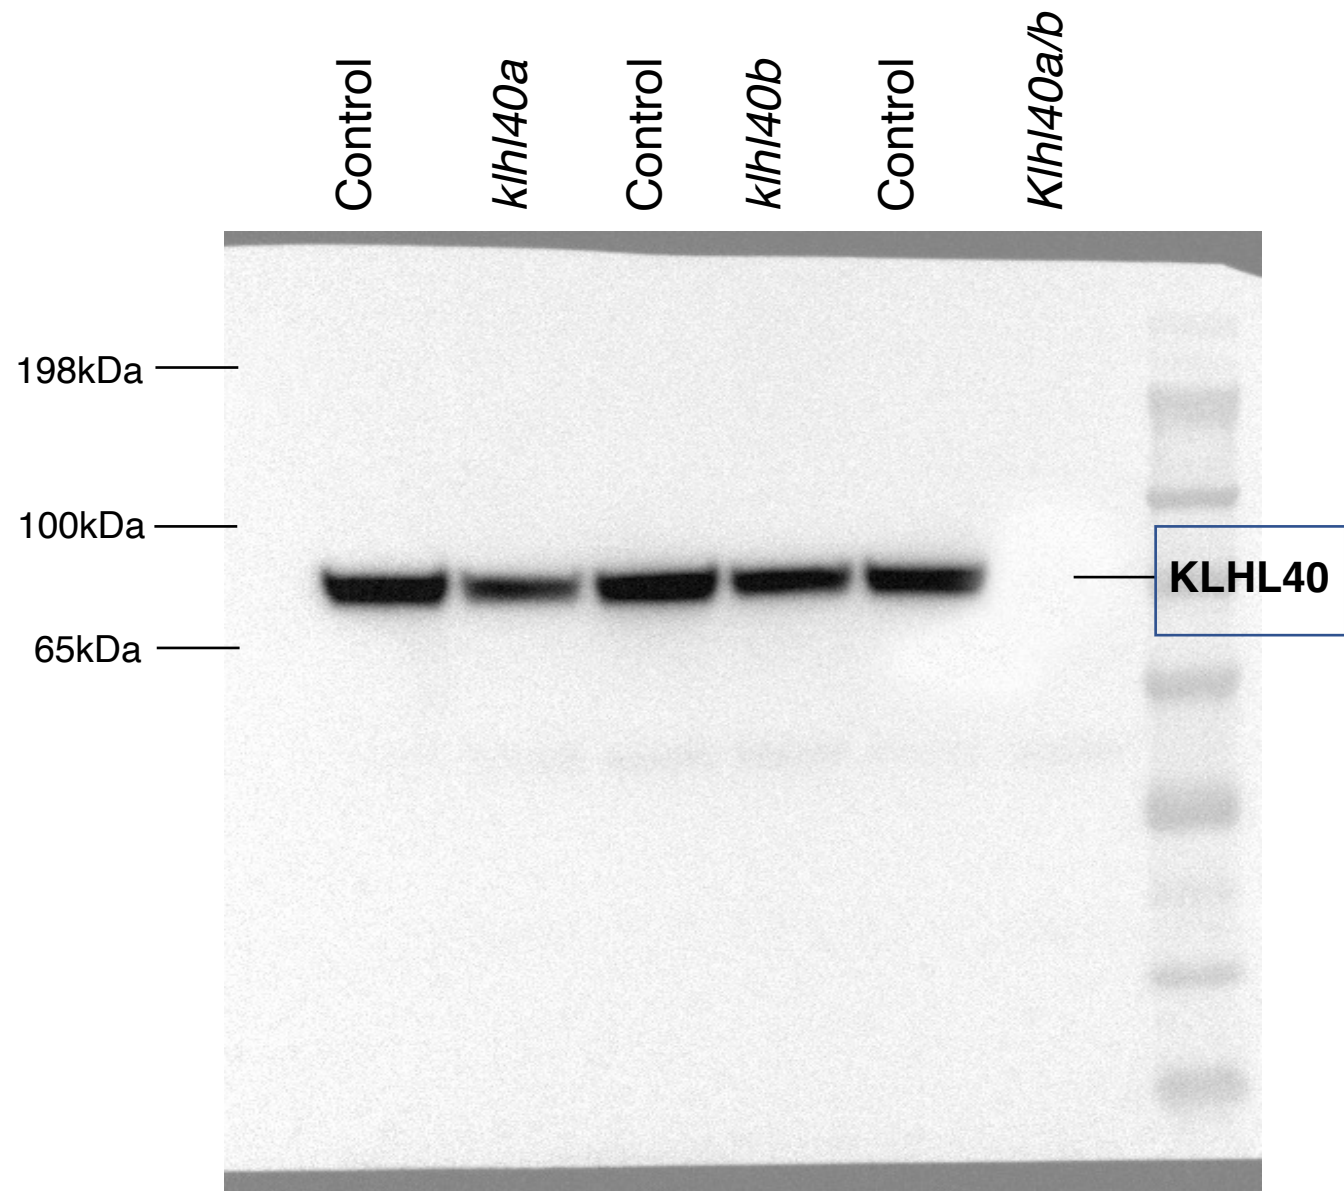

WB: Anti-KBTBD5: sc-99943, Santa Cruz Biotechnology

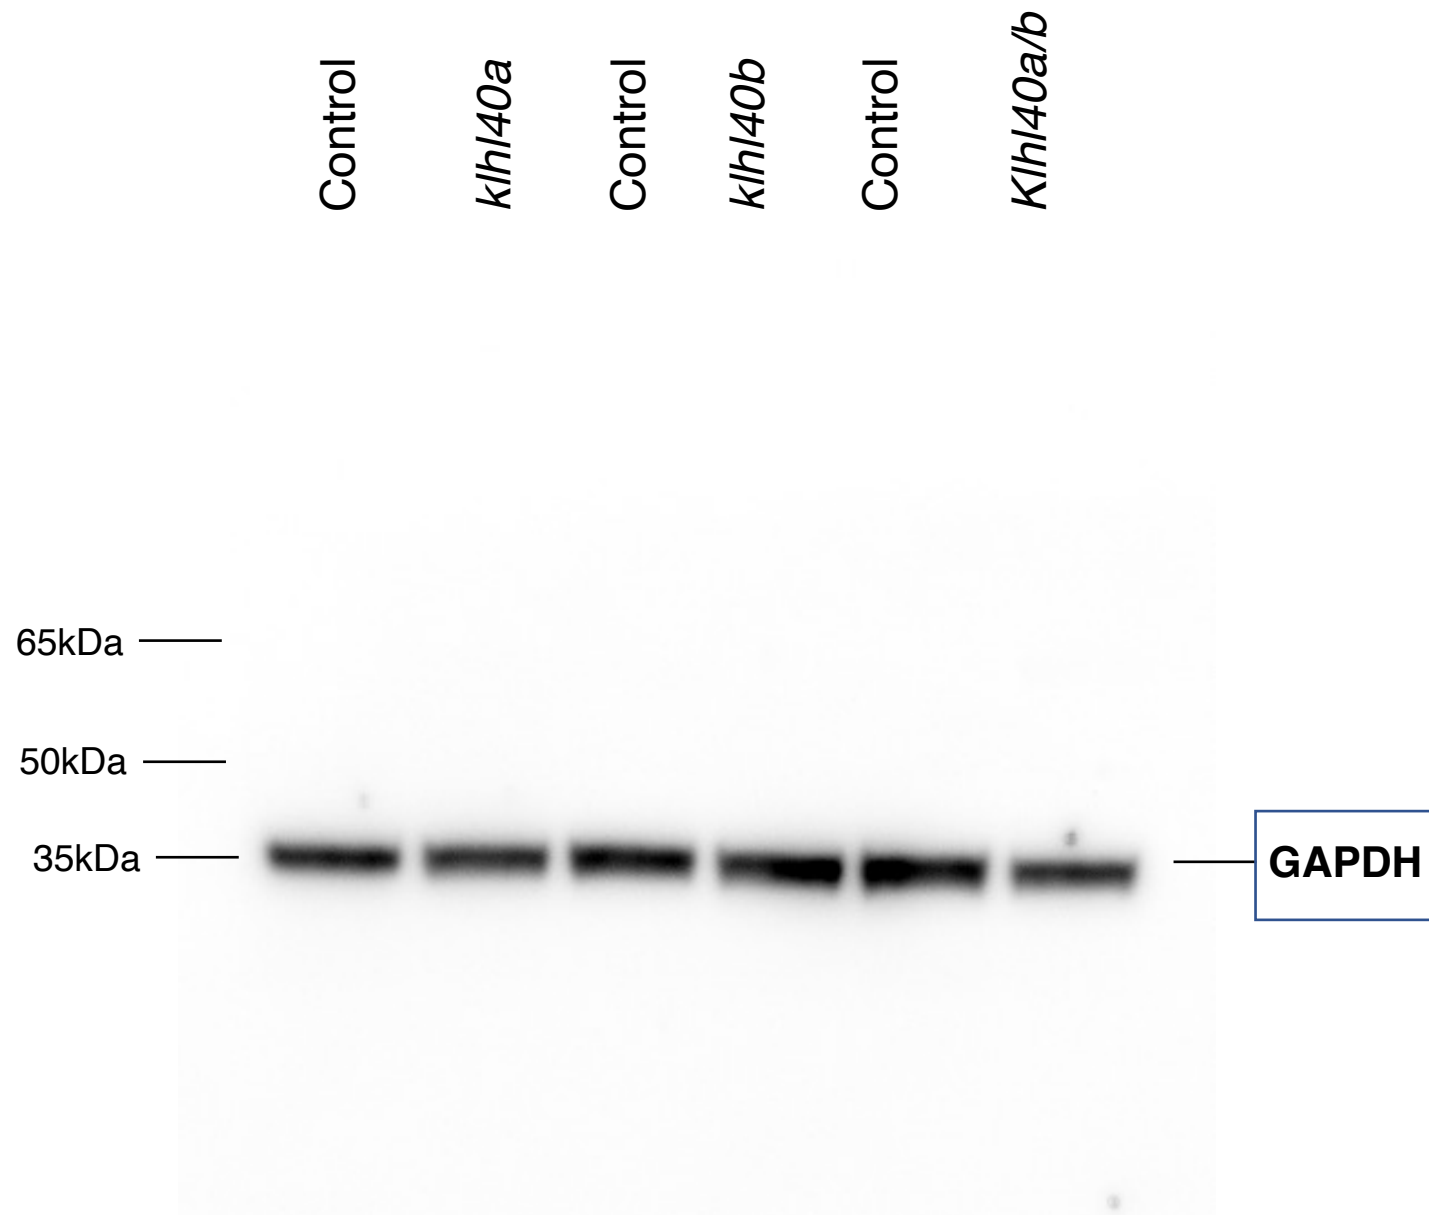

WB: Anti-GAPDH: 2118, Cell Signaling Technology
