# Supplementary material for: Dynamic regulation of inter-organelle communication by ubiquitylation controls skeletal muscle development and disease onset
Source: eLife. 2023 Jul 11;12:e81966. doi: 10.7554/eLife.81966 (PMC10356137; doi:10.7554/eLife.81966)
Supplement: Figure 5—source data 6. [file elife-81966-fig5-data6.xlsx]

## Sheet: Sheet1
									1.5 mo KO to 1.5 mo WT			4 mo KO to 4 mo WT			4 mo KO to 1.5 mo KO			4 mo WT to 1.5 mo WT			TMT Log2 Values
gene	Spectra Counts	Number of unique peptides	percent Coverage (%)	Score Unique	species	protein MW	Entry Name	subcellular location	Log2 fold-change	p-value	Adj p-value	Log2 fold-change	p-value	Adj p-value	Log2 fold-change	p-value	Adj p-value	Log2 fold-change	p-value	Adj p-value	Wild Type 4 month, rep 3	KLHL KO 1.5 month, rep 3	Wild Type 4 month, rep 4	Wild Type 1.5 months, rep 2	KLHL KO 4 months, rep 2	Wild Type 4 month, rep 1	KLHL KO 4 months, rep 1	KLHL KO 1.5 month, rep 1	Wild Type 4 month, rep 2	Wild Type 1.5 months, rep 1	KLHL KO 4 months, rep 4	KLHL KO 1.5 month, rep 4	Wild Type 1.5 months, rep 3	KLHL KO 1.5 month, rep 2	Wild Type 1.5 months, rep 4
Atg5	Not detected
Atg16l1	2	2	5.1	20.32	DANRE	69004.3	ATG16 autophagy-related 16-like 1 (S. cerevisiae)	NA	0.139856	0.242773	0.373162	-0.00815655	0.948301	0.978959	-0.0731335	0.563592	0.863983	0.0748791	0.523649	0.664358	0.271628	0.275403	0.288097	-0.00357242	0.128312	0.115627	0.302275	0.242315	0.0780468	-0.141389	0.109992	0.28961	0.173764	0.205978	0.42508
Atg4b	3	3	9.1	28.73	DANRE	45194.2	Cysteine protease ATG4B	SUBCELLULAR LOCATION: Cytoplasm {ECO:0000250}.	-0.626989	0.0489975	0.12395	-0.429887	0.191046	0.429011	-0.523956	0.116656	0.461649	-0.721058	0.0267732	0.0917669	-0.363698	0.802927	-0.301617	0.425654	-0.144519	0.601348	-0.731013	-0.329424	-0.161408	0.283728	-0.583162	-0.179461	1.14193	-0.143143	0.807547
Atg9a	Not detected
Lc3b	Not detected
Lamp1b	3	2	9	36.98	DANRE	27450.9	Lysosomal-associated membrane protein 1b	SUBCELLULAR LOCATION: Lysosome membrane {ECO:0000256|PROSITE-ProRule:PRU00740}; Single-pass type I membrane protein {ECO:0000256|PROSITE-ProRule:PRU00740}. Membrane {ECO:0000256|ARBA:ARBA00004479}; Single-pass type I membrane protein {ECO:0000256|ARBA:ARBA00004479}.	0.512564	0.319518	0.455162	-0.17206	0.752745	0.887864	-0.899451	0.116662	0.461649	-0.214827	0.671459	0.77966	-0.0745113	1.16086	-0.404172	-1.09542	-0.499735	-0.815432	0.20979	0.236256	0.522043	-0.867913	-0.805289	0.572764	0.960295	0.167609	1.09027
Lamp2	3	2	6.6	22.11	DANRE	38338.2	Lysosomal-associated membrane protein 2	SUBCELLULAR LOCATION: Lysosome membrane {ECO:0000256|PROSITE-ProRule:PRU00740}; Single-pass type I membrane protein {ECO:0000256|PROSITE-ProRule:PRU00740}. Membrane {ECO:0000256|ARBA:ARBA00004479}; Single-pass type I membrane protein {ECO:0000256|ARBA:ARBA00004479}.	-0.107339	0.819824	0.877226	-0.456893	0.376473	0.623172	-0.564622	0.278276	0.67703	-0.215067	0.64915	0.76509	-0.00269082	1.2553	0.016873	-0.688482	-0.402853	-0.358824	-0.0455374	-0.276837	0.85127	-0.271922	-0.542318	0.156457	0.881713	-0.197382	1.44559
