# Supplementary material for: Dynamic regulation of inter-organelle communication by ubiquitylation controls skeletal muscle development and disease onset
Source: eLife. 2023 Jul 11;12:e81966. doi: 10.7554/eLife.81966 (PMC10356137; doi:10.7554/eLife.81966)
Supplement: Figure 6—figure supplement 1—source data 8. [file elife-81966-fig6-figsupp1-data8.xlsx]

## Sheet: Sheet1
id	Proteome_onVera_20201216_126C	Proteome_onVera_20201216_127N	Proteome_onVera_20201216_127C	Proteome_onVera_20201216_128N	Proteome_onVera_20201216_128C	Proteome_onVera_20201216_129N	Proteome_onVera_20201216_129C	Proteome_onVera_20201216_130C	Proteome_onVera_20201216_131N	Proteome_onVera_20201216_131C	Proteome_onVera_20201216_132N	Proteome_onVera_20201216_132C	Proteome_onVera_20201216_133N	Proteome_onVera_20201216_133C	Proteome_onVera_20201216_134N	tr1M_KO - tr1M_WT.logFC	tr1M_KO - tr1M_WT.P.Value	tr1M_KO - tr1M_WT.adj.P.Val	tr1M_KO - tr1M_WT.Q.Value	tr4M_KO - tr4M_WT.logFC	tr4M_KO - tr4M_WT.P.Value	tr4M_KO - tr4M_WT.adj.P.Val	tr4M_KO - tr4M_WT.Q.Value	tr4M_KO - tr1M_KO.logFC	tr4M_KO - tr1M_KO.P.Value	tr4M_KO - tr1M_KO.adj.P.Val	tr4M_KO - tr1M_KO.Q.Value	tr4M_WT - tr1M_WT.logFC	tr4M_WT - tr1M_WT.P.Value	tr4M_WT - tr1M_WT.adj.P.Val	tr4M_WT - tr1M_WT.Q.Value	accession_number	numColumnsProteinObserved	numSpectraProteinObserved	numPepsUnique	numPepsUniqueSubgroupSpecificCI	accession_numbers	species	protein_mw	percentCoverage	groupNum	subgroupNum	scoreUnique	scoreUniqueSubgroupSpecificCI	entry_name	gene	subcellular_location
F1RDC0	0	0	0	0	0	0	0	0	0	0	0	0	0	0	0	0	0	0	0	0	0	0		0	0	0	0	0	0	0	0	Q6DG88	0	0	0	0	Q6DG88	DANRE							ATG5	atg5
A0A0R4IP97	0.271628	0.275403	0.288097	-0.00357242	0.128312	0.115627	0.302275	0.242315	0.0780468	-0.141389	0.109992	0.28961	0.173764	0.205978	0.42508	0.139856	0.242773	0.373162	0.138626	-0.00815655	0.948301	0.978959	0.60797	-0.0731335	0.563592	0.863983	0.689334	0.0748791	0.523649	0.664358	0.267378	A0A0R4IP97	1	2	2	2	A0A0R4IP97|A0A0R4IWT6|A0A0R4IBY0|A0A0R4IRC0	DANRE	69004.3	5.1	4723	4723.1	20.32	20.32	ATG16 autophagy-related 16-like 1 (S. cerevisiae)	atg16l1	NA
Q6DG88	-0.363698	0.802927	-0.301617	0.425654	-0.144519	0.601348	-0.731013	-0.329424	-0.161408	0.283728	-0.583162	-0.179461	1.14193	-0.143143	0.807547	-0.626989	0.0489975	0.12395	0.0460463	-0.429887	0.191046	0.429011	0.266432	-0.523956	0.116656	0.461649	0.368329	-0.721058	0.0267732	0.0917669	0.0369325	Q6DG88	1	3	3	3	Q6DG88|X1WDI5	DANRE	45194.2	9.1	4042	4042.1	28.73	28.73	Cysteine protease ATG4B	atg4b	SUBCELLULAR LOCATION: Cytoplasm {ECO:0000250}.
A2RV24	0	0	0	0	0	0	0	0	0	0	0	0	0	0	0	0	0	0	0	0	0	0	0	0	0	0	0	0	0	0	0	A2rV24	0	0	0		A2RV24	DANRE							ATG9a	atg9a
F1RCP1	0	0	0	0	0	0	0	0	0	0	0	0	0	0	0	0	0	0	0	0	0	0	0	0	0	0	0	0	0	0	0	F1RCP1	0	0	0	0	F1RCP1	DANRE							Beclin1	beclin1
Q7ZUD8	0	0	0	0	0	0	0	0	0	0	0	0	0	0	0	0	0	0	0	0	0	0	0	0	0	0	0	0	0	0	0	Q7ZUD8	0	0	0	0	Q7ZUD8	DANRE							MAP1LC3B	lc3b
E9QCP4	-0.0745113	1.16086	-0.404172	-1.09542	-0.499735	-0.815432	0.20979	0.236256	0.522043	-0.867913	-0.805289	0.572764	0.960295	0.167609	1.09027	0.512564	0.319518	0.455162	0.169089	-0.17206	0.752745	0.887864	0.551397	-0.899451	0.116662	0.461649	0.368329	-0.214827	0.671459	0.77966	0.313782	E9QCP4	1	3	2	2	E9QCP4	DANRE	27450.9	9	3602	3602.1	36.98	36.98	Lysosomal-associated membrane protein 1b	lamp1b	SUBCELLULAR LOCATION: Lysosome membrane {ECO:0000256|PROSITE-ProRule:PRU00740}; Single-pass type I membrane protein {ECO:0000256|PROSITE-ProRule:PRU00740}. Membrane {ECO:0000256|ARBA:ARBA00004479}; Single-pass type I membrane protein {ECO:0000256|ARBA:ARBA00004479}.
A0A2R8QCH1	-0.00269082	1.2553	0.016873	-0.688482	-0.402853	-0.358824	-0.0455374	-0.276837	0.85127	-0.271922	-0.542318	0.156457	0.881713	-0.197382	1.44559	-0.107339	0.819824	0.877226	0.325882	-0.456893	0.376473	0.623172	0.387014	-0.564622	0.278276	0.67703	0.540172	-0.215067	0.64915	0.76509	0.307918	A0A2R8QCH1	1	3	2	2	A0A2R8QCH1|A0A2R8Q0I4|A0A0R4IZ00|Q5BKX3|F1R902	DANRE	38338.2	6.6	4545	4545.1	22.11	22.11	Lysosomal-associated membrane protein 2	lamp2	SUBCELLULAR LOCATION: Lysosome membrane {ECO:0000256|PROSITE-ProRule:PRU00740}; Single-pass type I membrane protein {ECO:0000256|PROSITE-ProRule:PRU00740}. Membrane {ECO:0000256|ARBA:ARBA00004479}; Single-pass type I membrane protein {ECO:0000256|ARBA:ARBA00004479}.
