# Supplementary material for: Dynamic regulation of inter-organelle communication by ubiquitylation controls skeletal muscle development and disease onset
Source: eLife journal article supplement (doi:10.7554/elife.81966), 2023-07-07
Supplement: supp [file elife-81966-supp-v1.zip]

Figure 1-figure supplement 1-source data 8

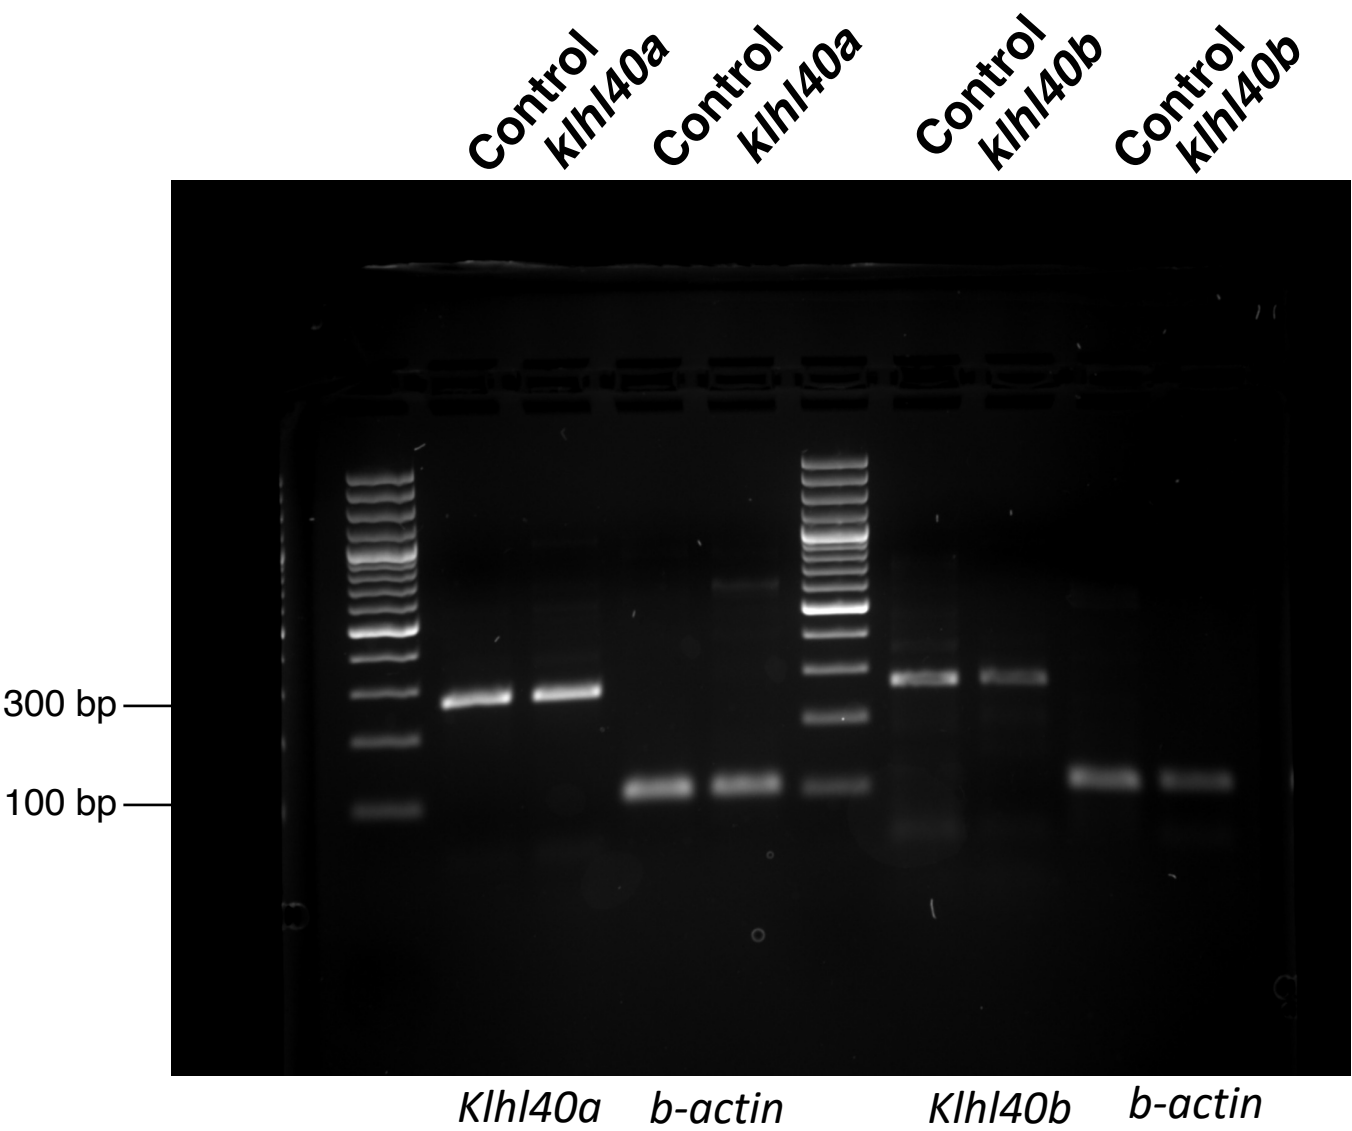

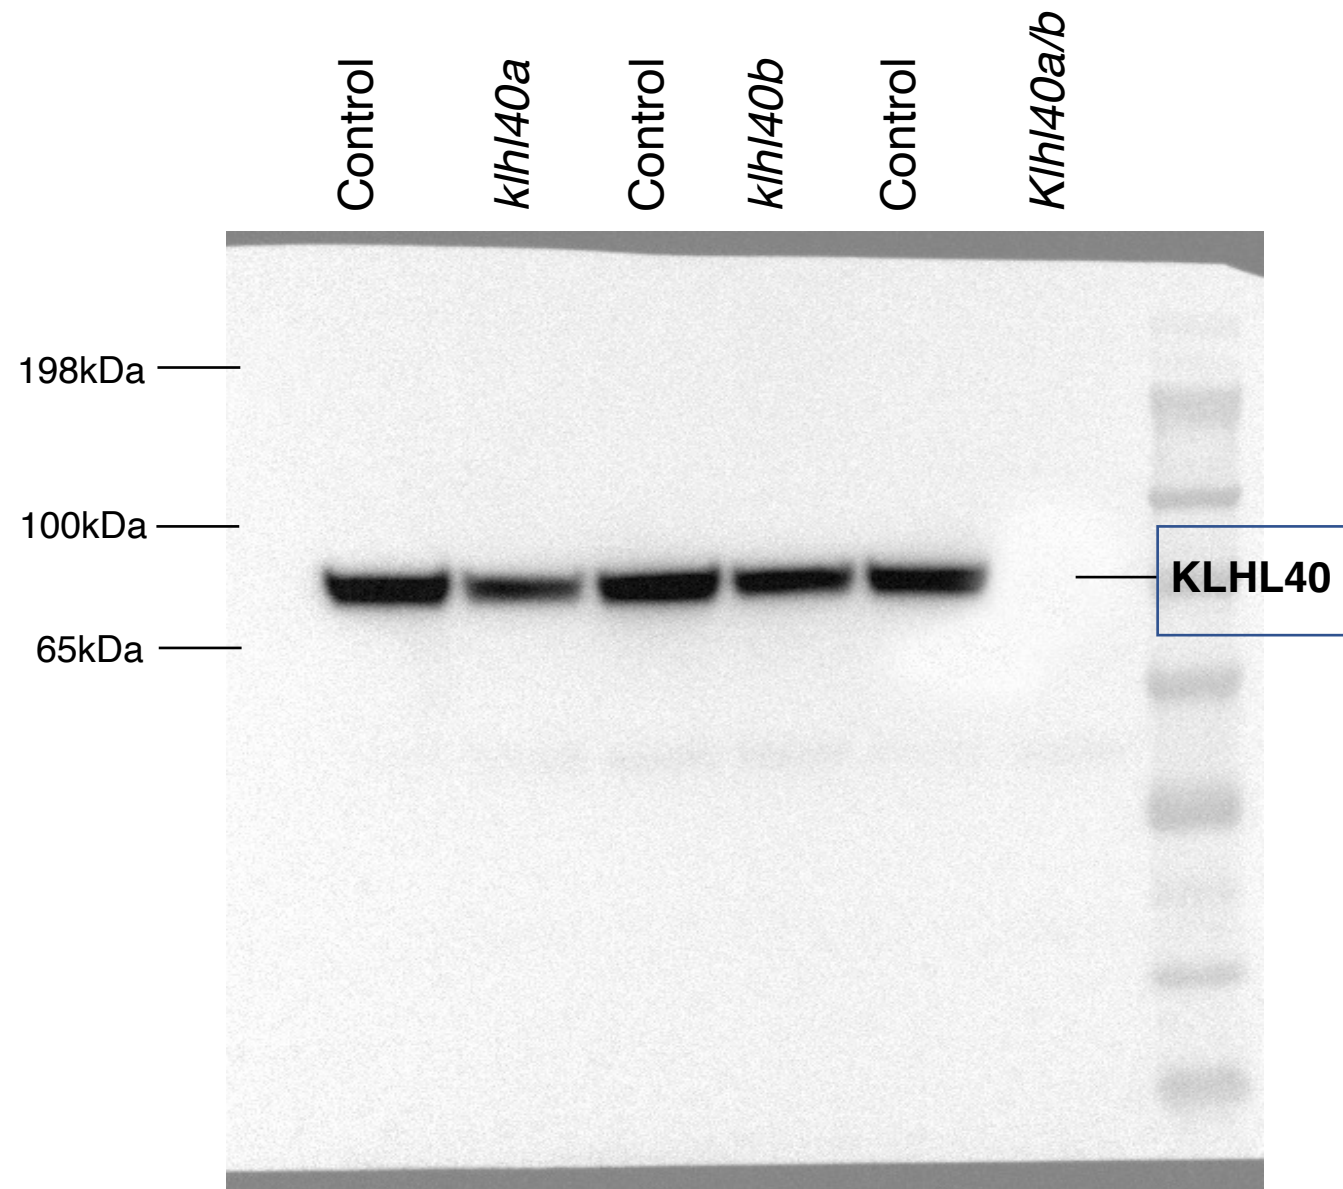

WB: Anti-KBTBD5: sc-99943, Santa Cruz Biotechnology

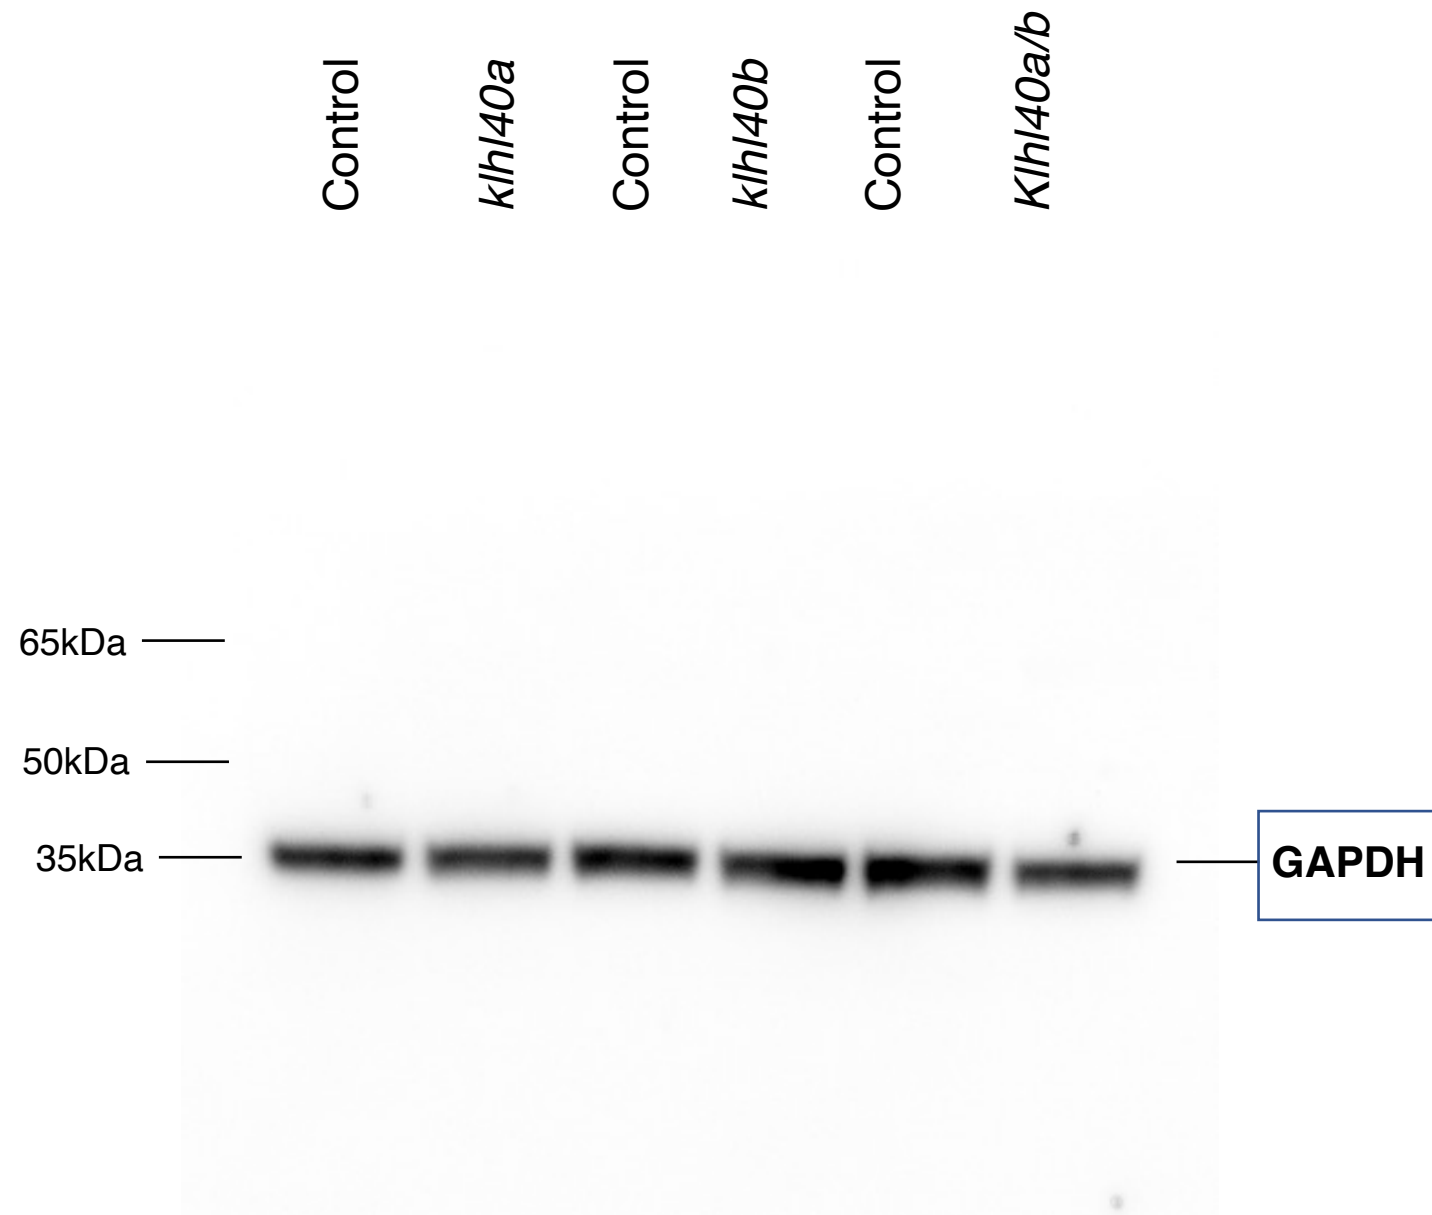

WB: Anti-GAPDH: 2118, Cell Signaling Technology
