# Supplementary material for: Dynamic regulation of inter-organelle communication by ubiquitylation controls skeletal muscle development and disease onset
Source: eLife journal article supplement (doi:10.7554/elife.81966), 2023-07-07
Supplement: supp [file elife-81966-supp-v1.zip]

**Figure 7A**

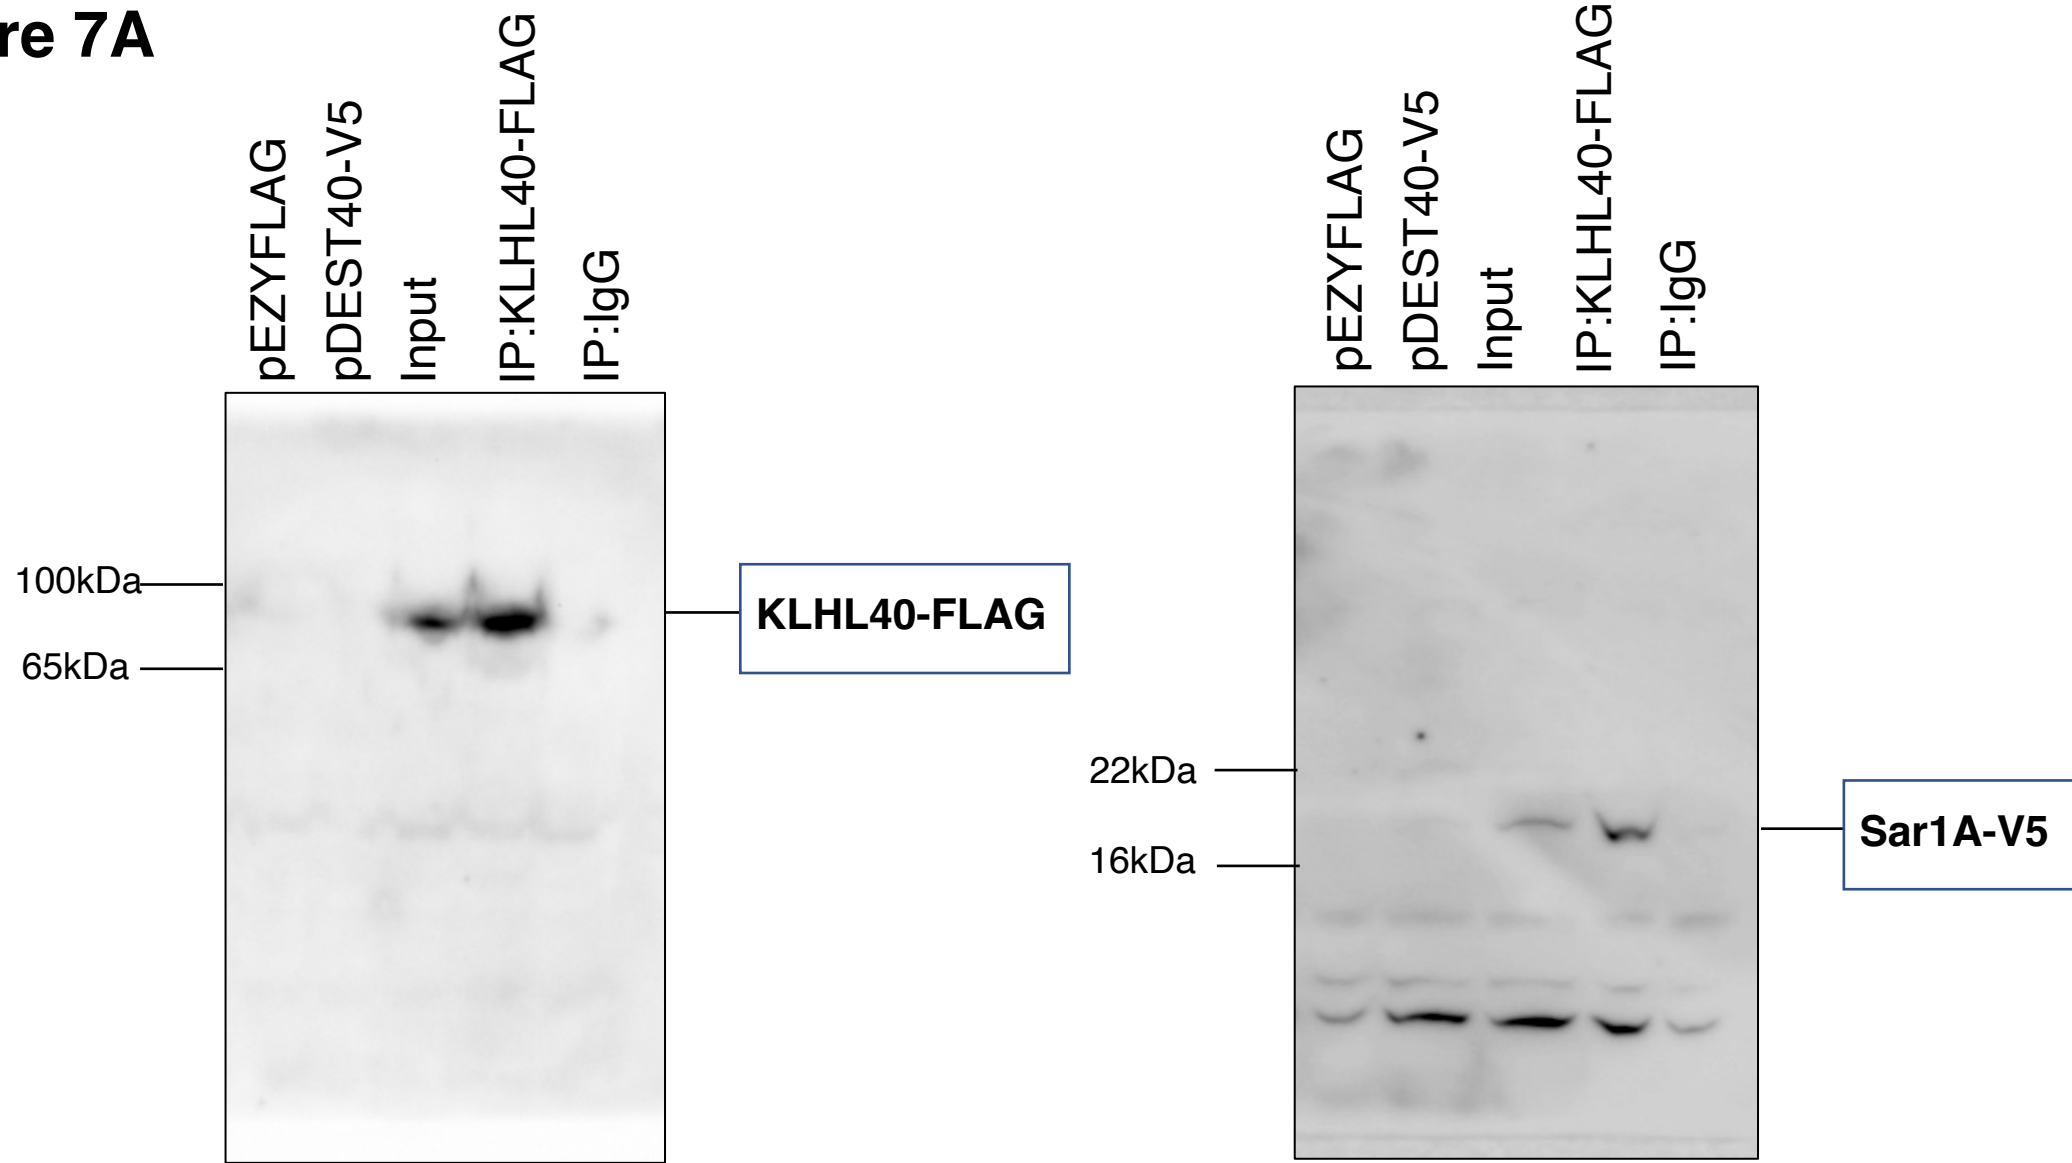

WB: Anti-FLAG: F1804, Sigma-Aldrich

WB: Anti-V5: R960-25, Thermofisher Scientific

# Figure 7B

KLHL40-FLAG (ug)      0   2.0   1.5   1.0   0.5   0.0  
SAR1A-V5 (ug)      0   2.0   2.0   2.0   2.0   2.0

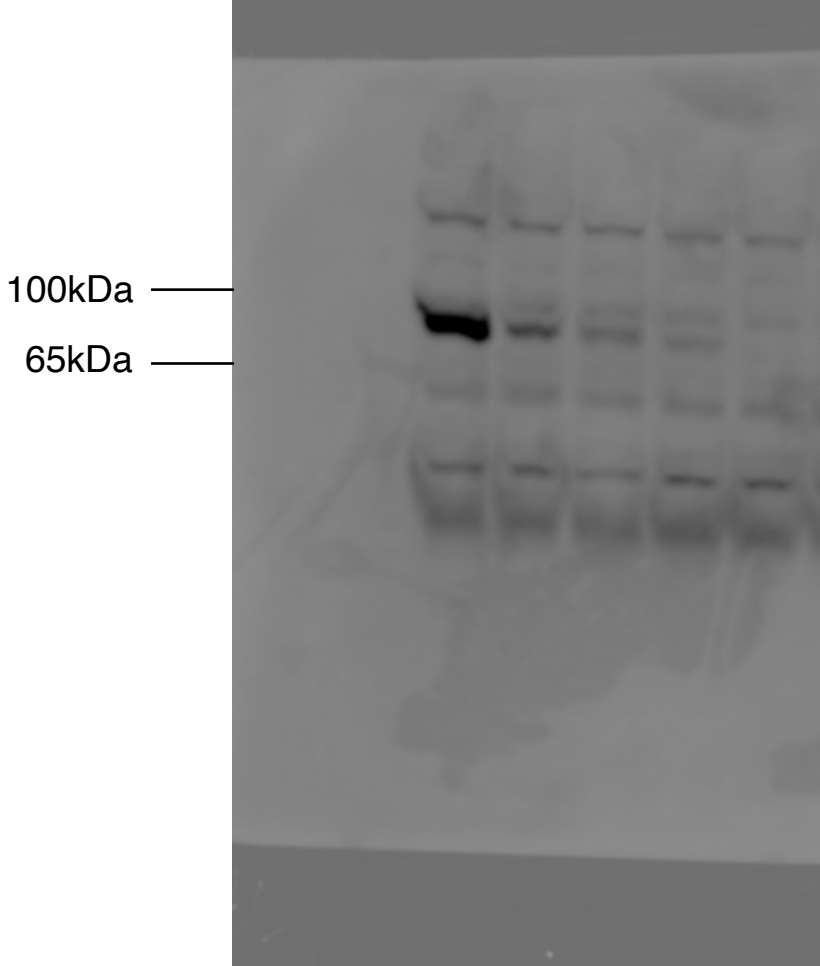

**KLHL40-FLAG**

WB: Anti-FLAG: F1804, Sigma-Aldrich

KLHL40-FLAG (ug)      0   2.0   1.5   1.0   0.5   0.0  
SAR1A-V5 (ug)      0   2.0   2.0   2.0   2.0   2.0

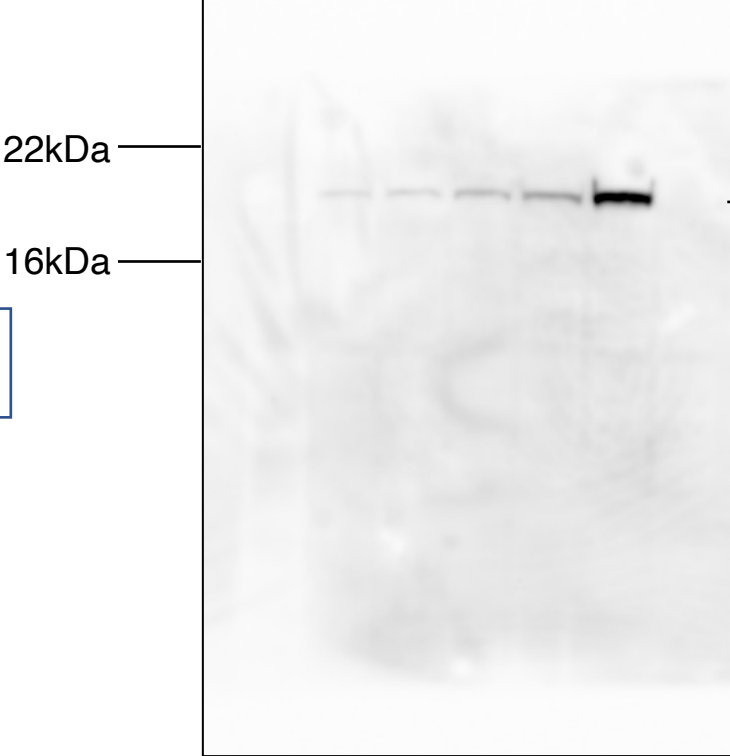

**SAR1A-V5**

WB: Anti-V5: R960-25, Thermofisher Scientific

# Figure 7B

KLHL40-FLAG (ug)            0   2.0   1.5   1.0   0.5   0.0  
SAR1A-V5 (ug)            0   2.0   2.0   2.0   2.0   2.0

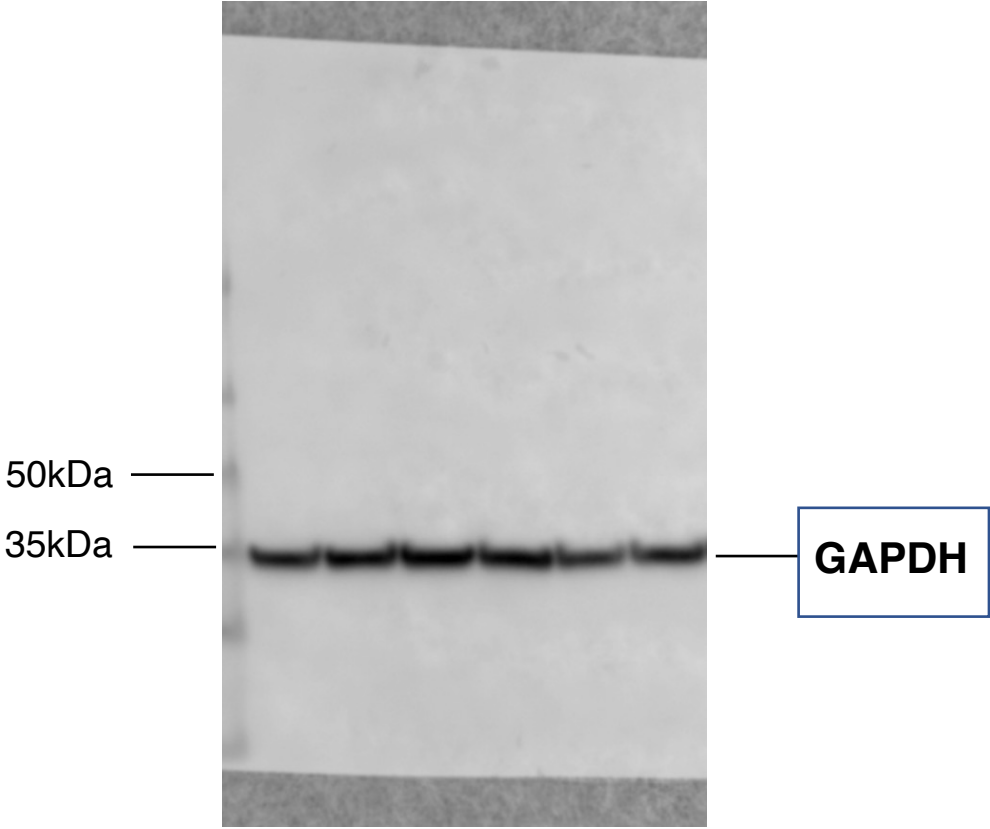

WB: Anti-GAPDH: ab8245, Abcam

# Figure 7C

KLHL40-FLAG (ug)      0   2.0   1.5   1.0   0.5   0.0  
SAR1A-V5 (ug)      0   2.0   2.0   2.0   2.0   2.0

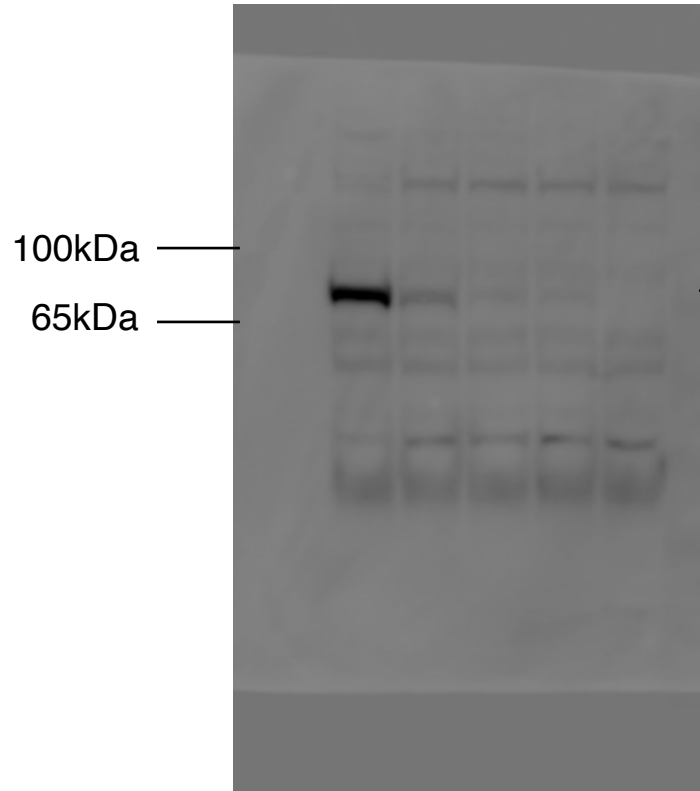

**KLHL40-FLAG**

WB: Anti-FLAG: F1804, Sigma-Aldrich

KLHL40-FLAG (ug)      0   2.0   1.5   1.0   0.5   0.0  
SAR1A-V5 (ug)      0   2.0   2.0   2.0   2.0   2.0

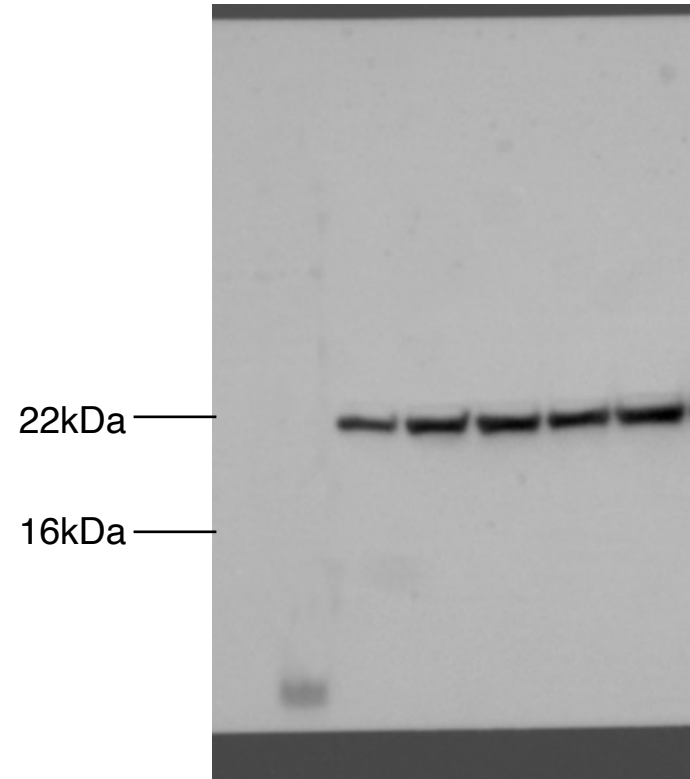

**SAR1A-V5**

WB: Anti-V5: R960-25, Thermofisher Scientific

# Figure 7C

|                  |   |     |     |     |     |     |
|------------------|---|-----|-----|-----|-----|-----|
| KLHL40-FLAG (ug) | 0 | 2.0 | 1.5 | 1.0 | 0.5 | 0.0 |
| SAR1A-V5 (ug)    | 0 | 2.0 | 2.0 | 2.0 | 2.0 | 2.0 |

50kDa —

35kDa —

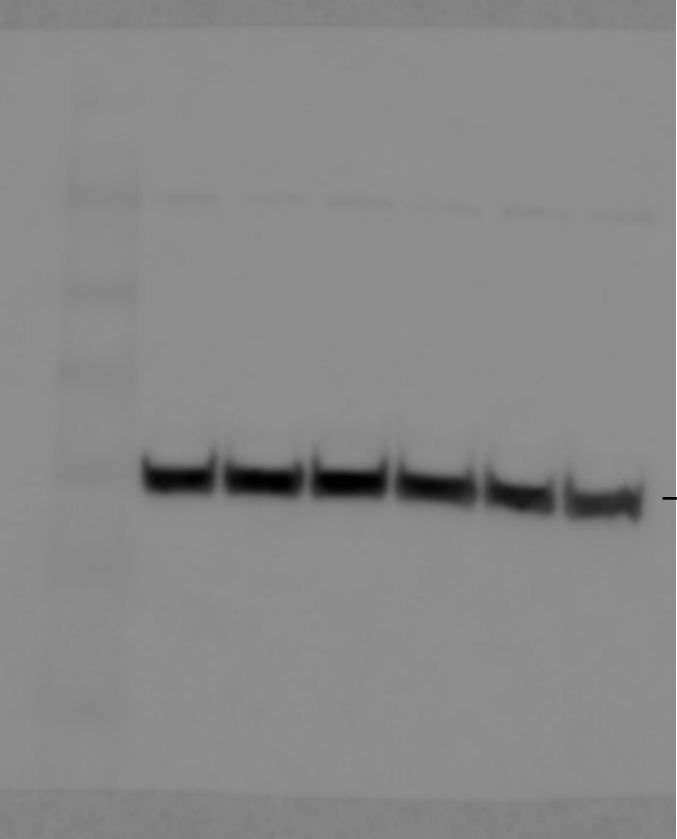

**GAPDH**

WB: Anti-GAPDH: ab8245, Abcam

Figure 7F

WT L86P W201L R311L E528K  
Time (min) 0 30 90 30 90 30 90 30 90 30 90

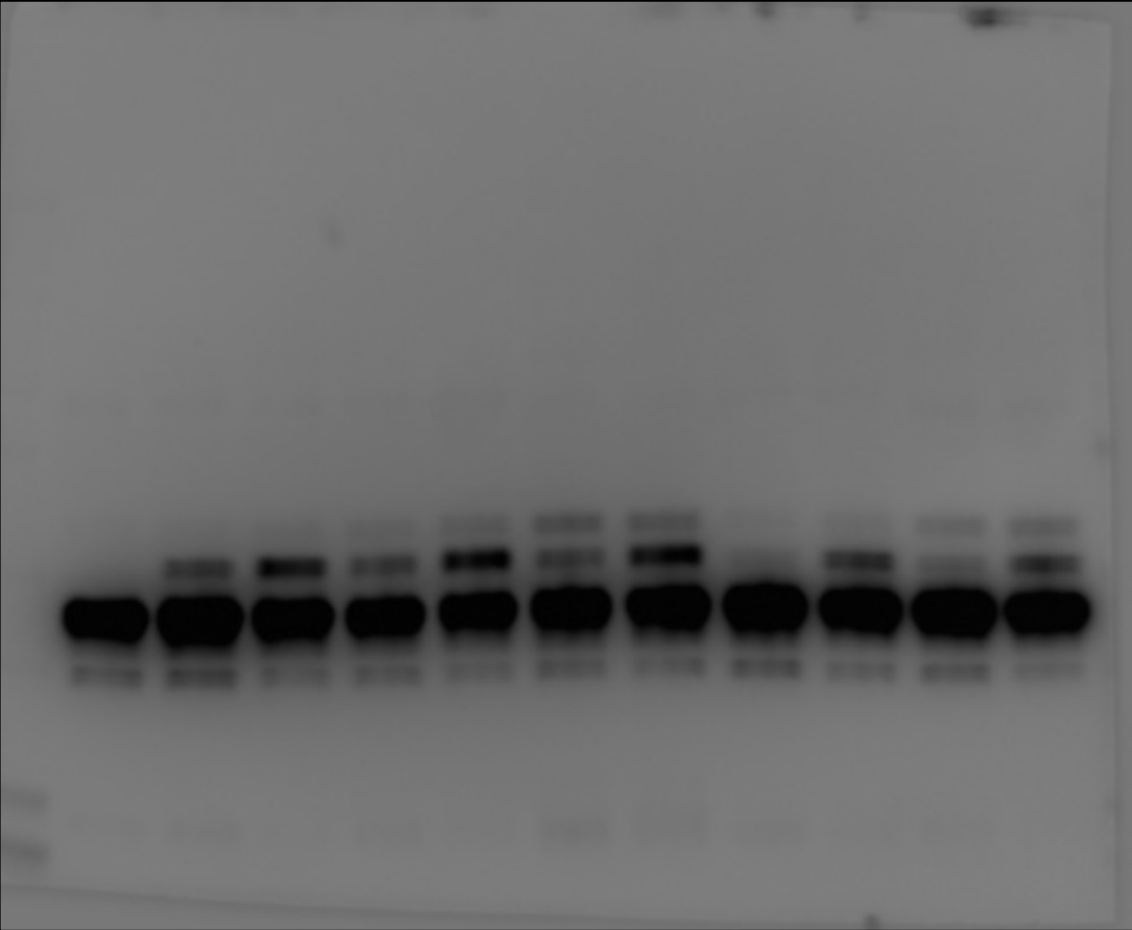

WB: Anti-Sar1: ab125871, Abcam

wt LP WL RL QK  
Time(min) 0 30 90 30 90 30 90 30 90 30 90

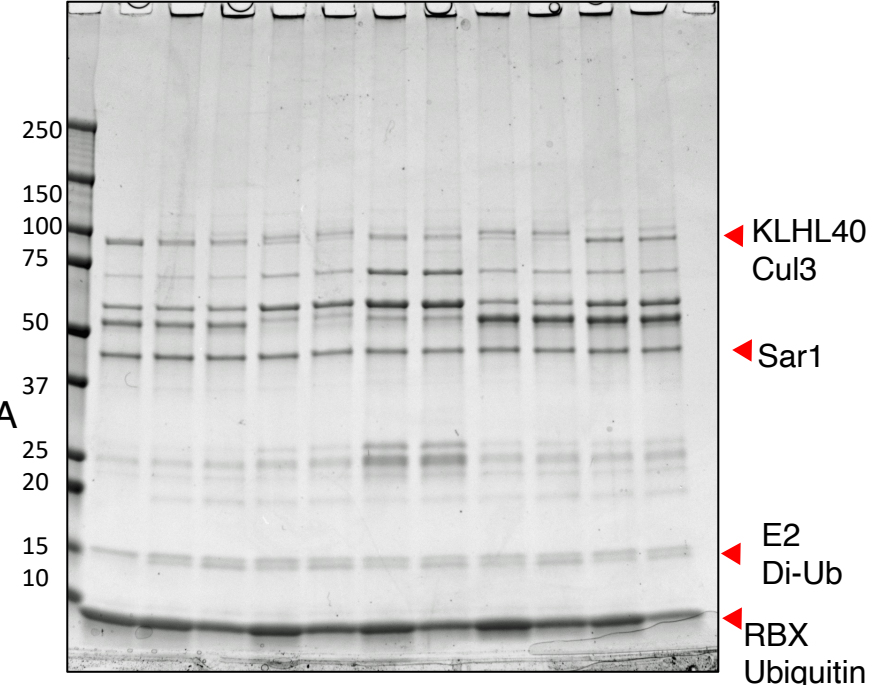

Colloidal Staining

**Figure 7H**

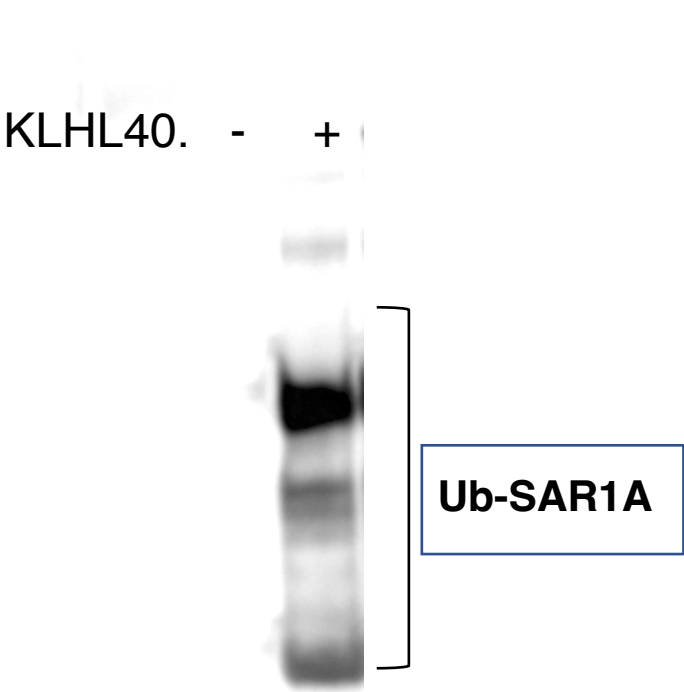

WB: Anti-Ubiquitin: ab7780, Abcam

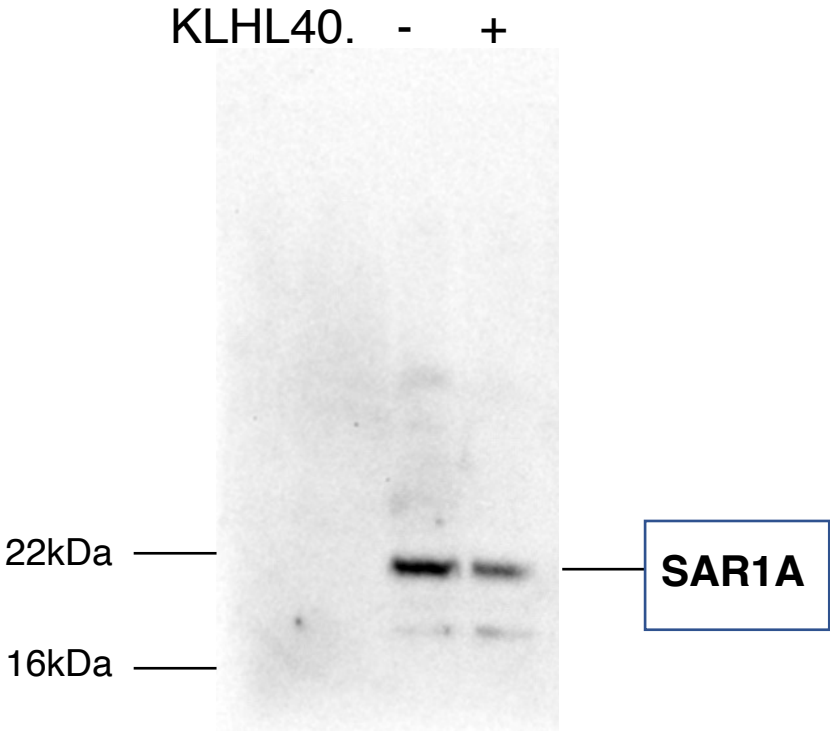

WB: Anti-Sar1: ab125871, Abcam
