# Supplementary material for: Dynamic regulation of inter-organelle communication by ubiquitylation controls skeletal muscle development and disease onset
Source: eLife journal article supplement (doi:10.7554/elife.81966), 2023-07-07
Supplement: supp [file elife-81966-supp-v1.zip]

# Figure 5 source file 5

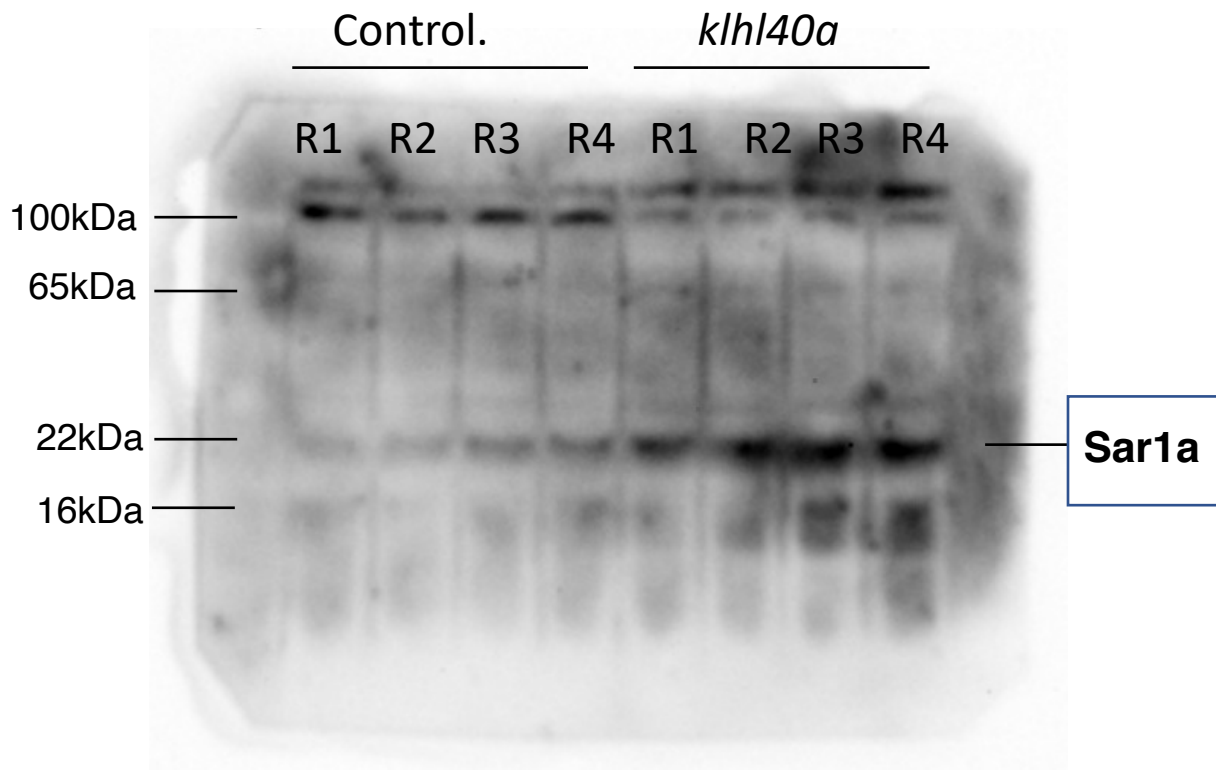

WB: Anti-Sar1: ab125871, Abcam

# Biological Replicates

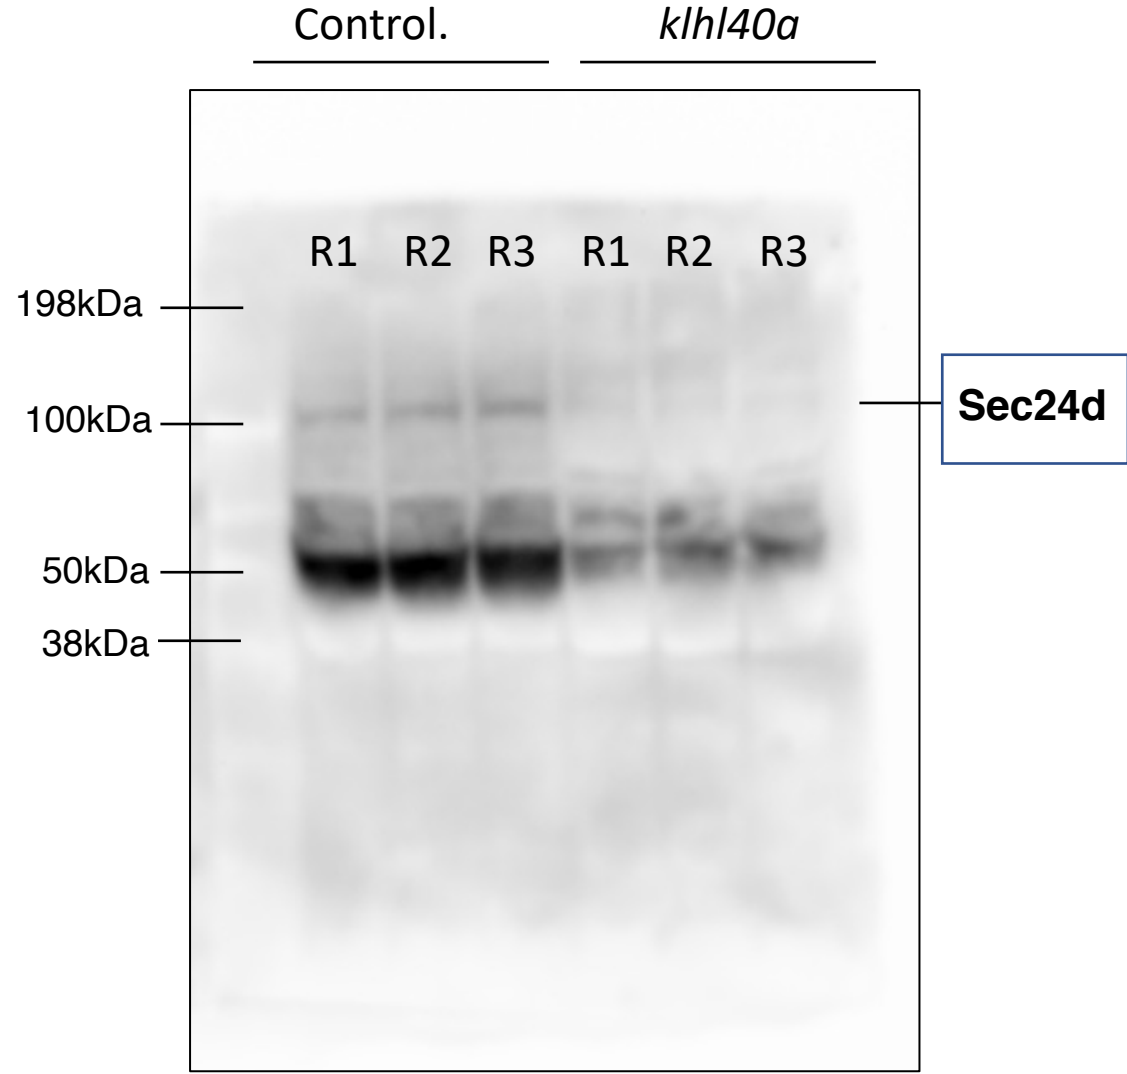

WB: Anti-Sec24d: 14687, Cell Signaling Technology

# Figure 5 source file 5

## Biological Replicates

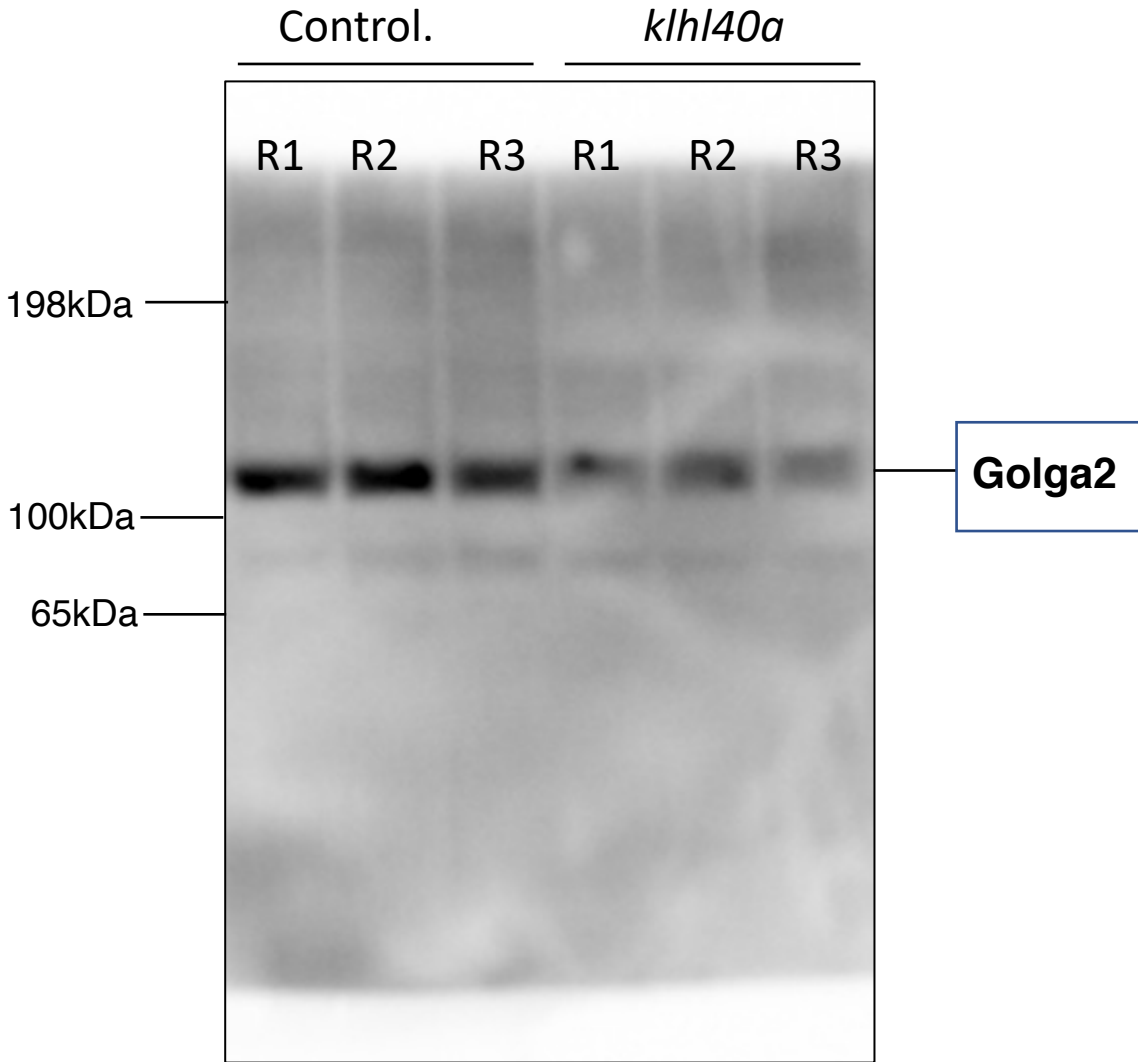

WB: Anti-Golga2: ab30637, Abcam

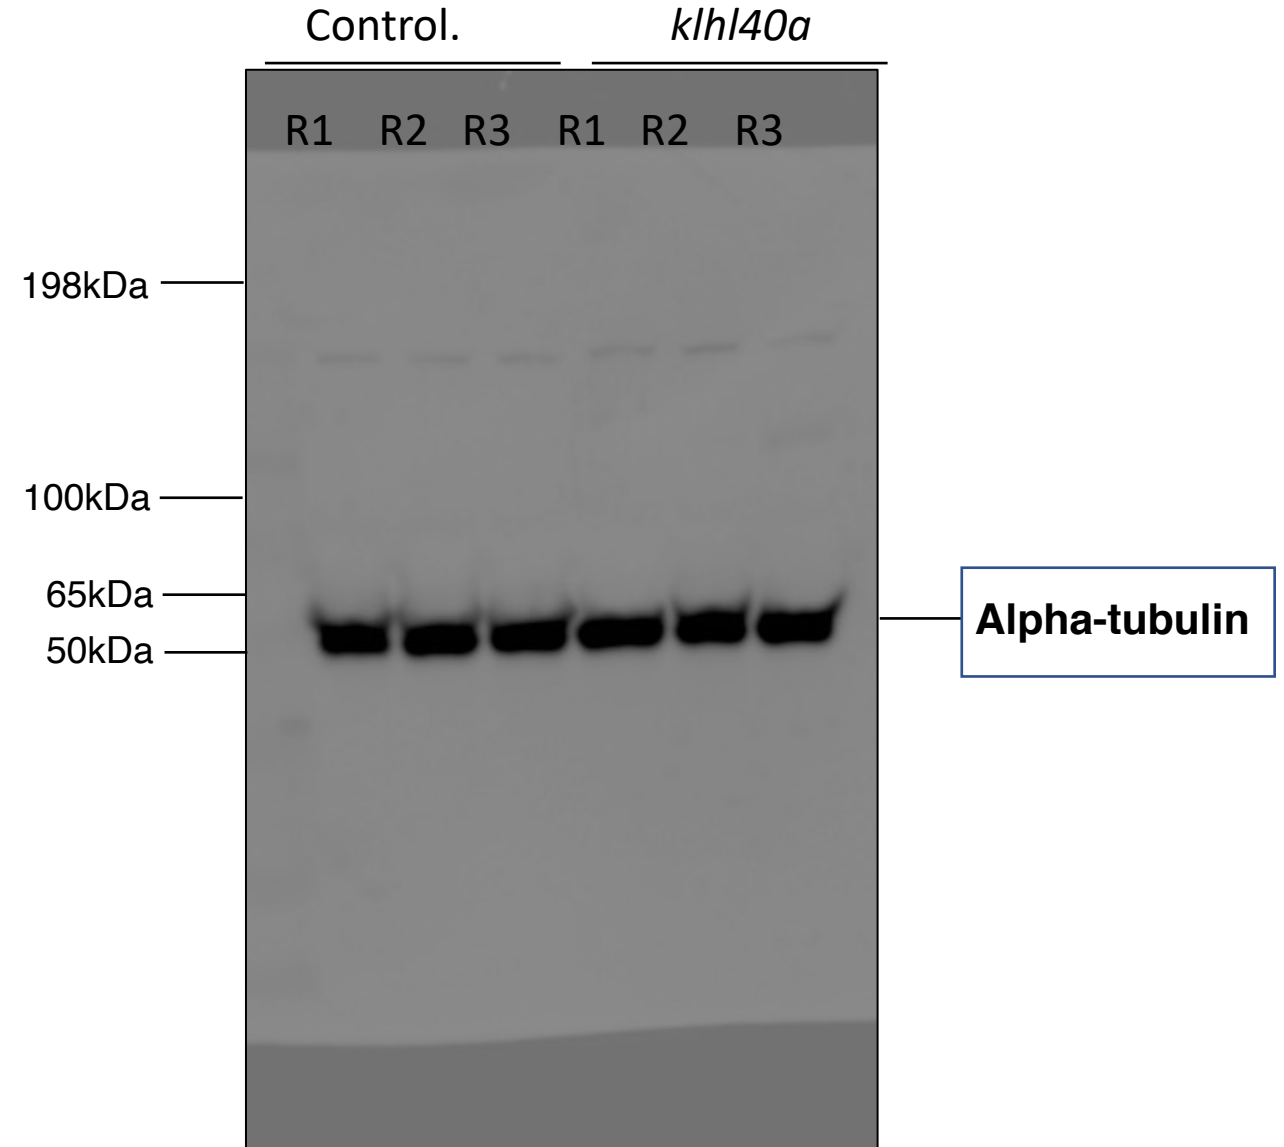

WB: Anti-tubulin: ab18251, Abcam
