# Supplementary material for: Dynamic regulation of inter-organelle communication by ubiquitylation controls skeletal muscle development and disease onset
Source: eLife journal article supplement (doi:10.7554/elife.81966), 2023-07-07
Supplement: supp [file elife-81966-supp-v1.zip]

# Figure 6-figure supplement 1-Source data 7

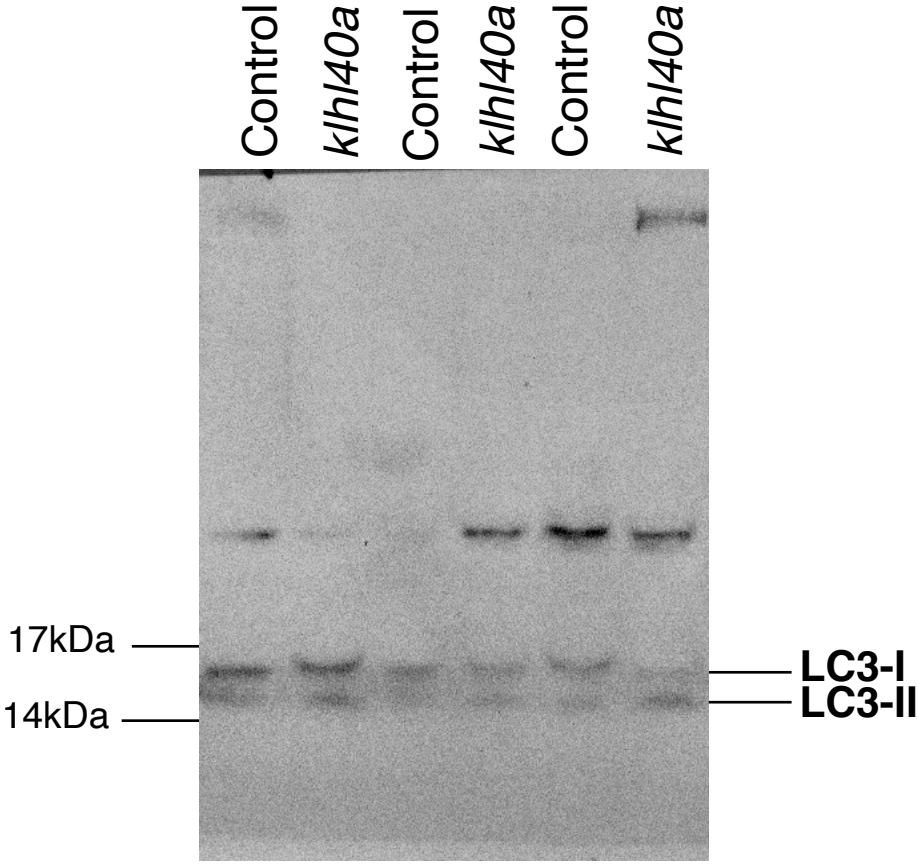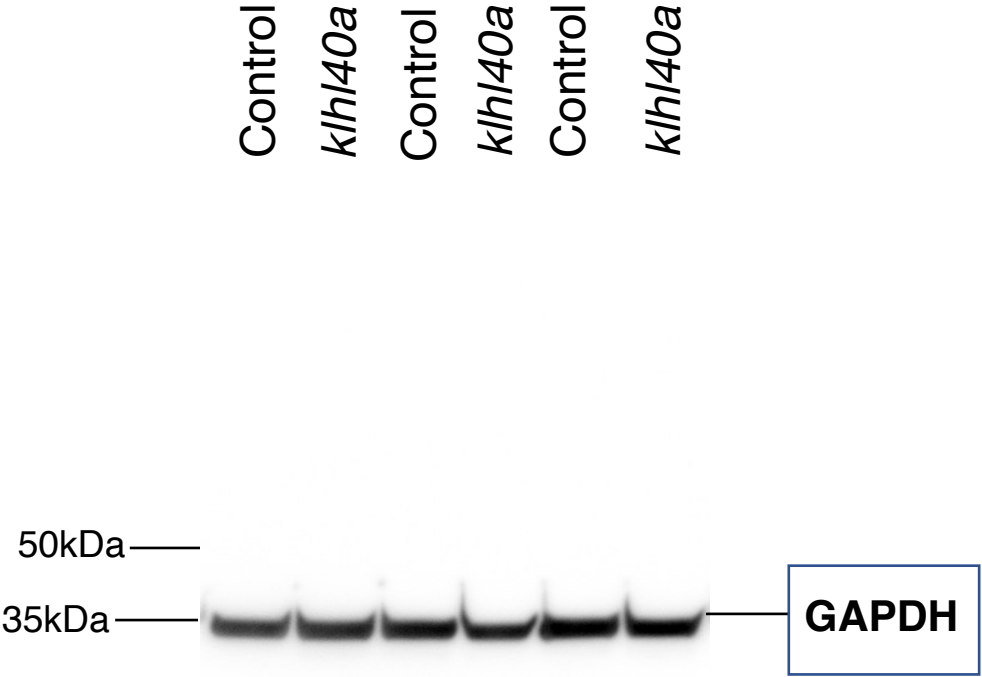

WB: Anti-LC3: 3868, Cell Signaling

WB: Anti-GAPDH: ab8245, Abcam

*xbp1-U*

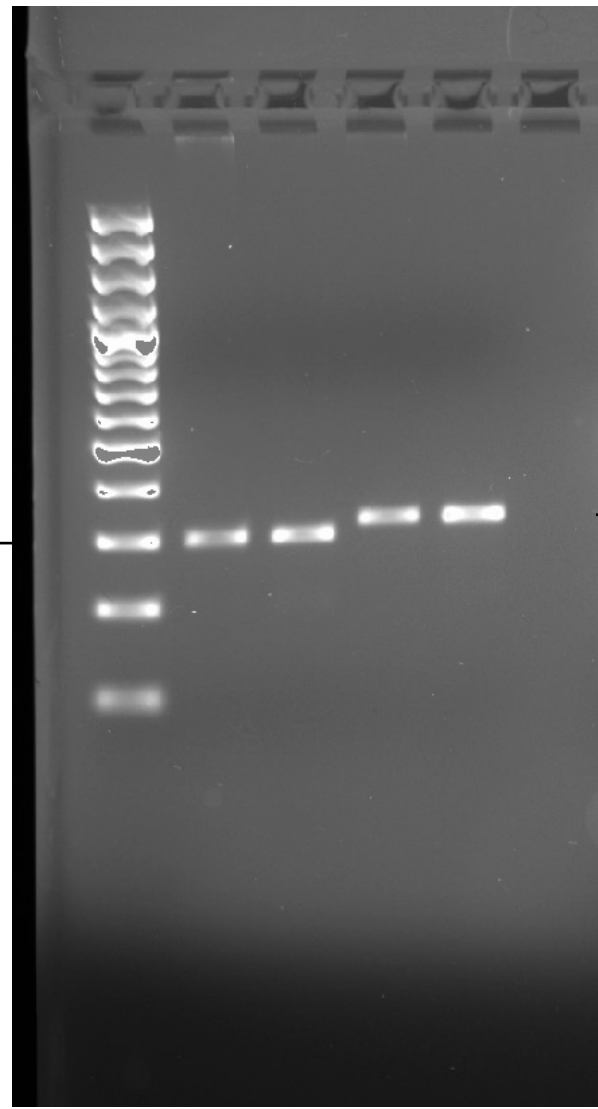

Control

*klh140a*

Control

*klh140a*

$\beta$ -actin

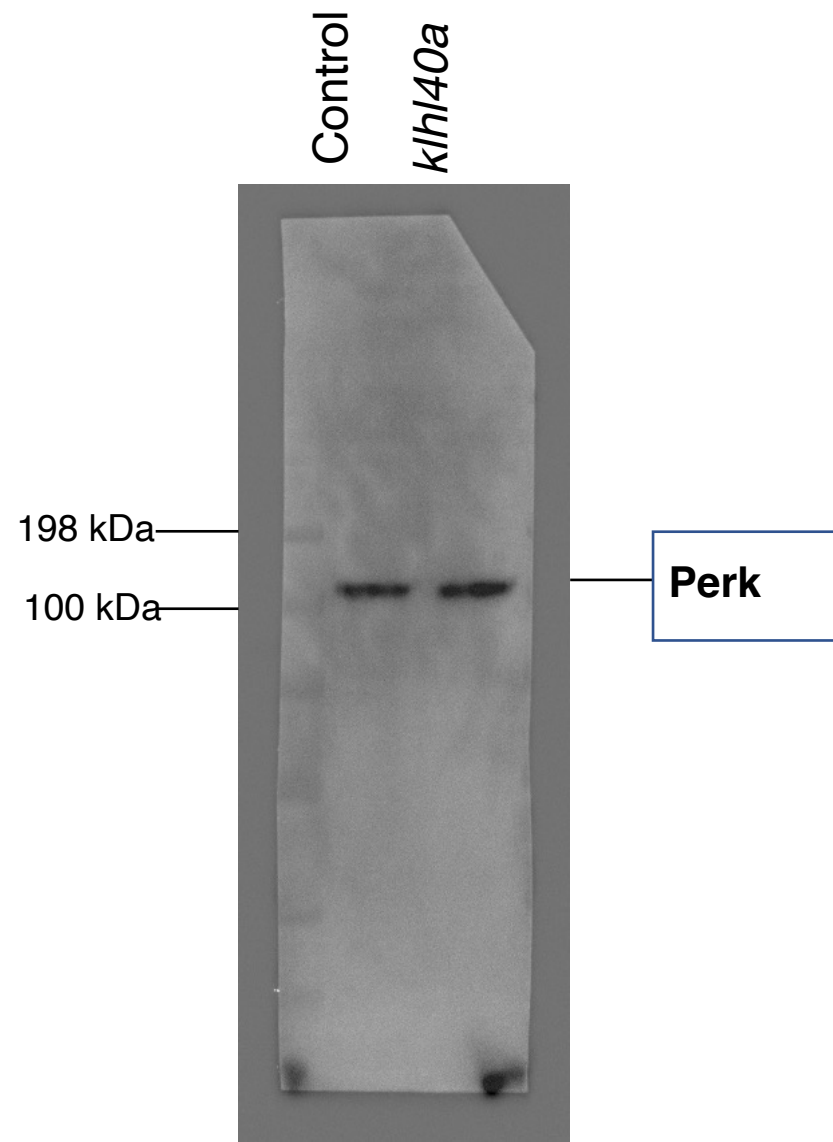

WB: Anti-PERK (3192, Cell Signaling Technology)

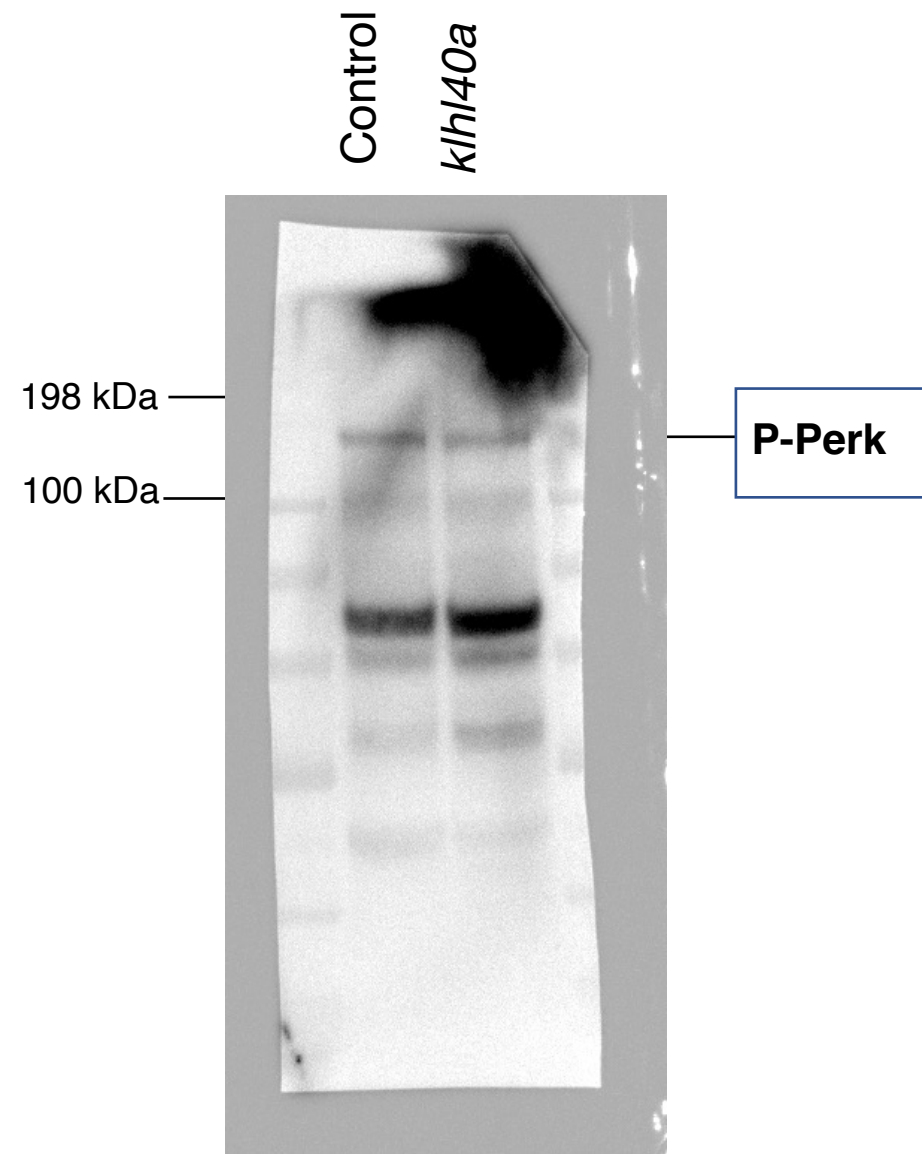

WB: Anti P-perk (3179, Cell Signaling Technology)

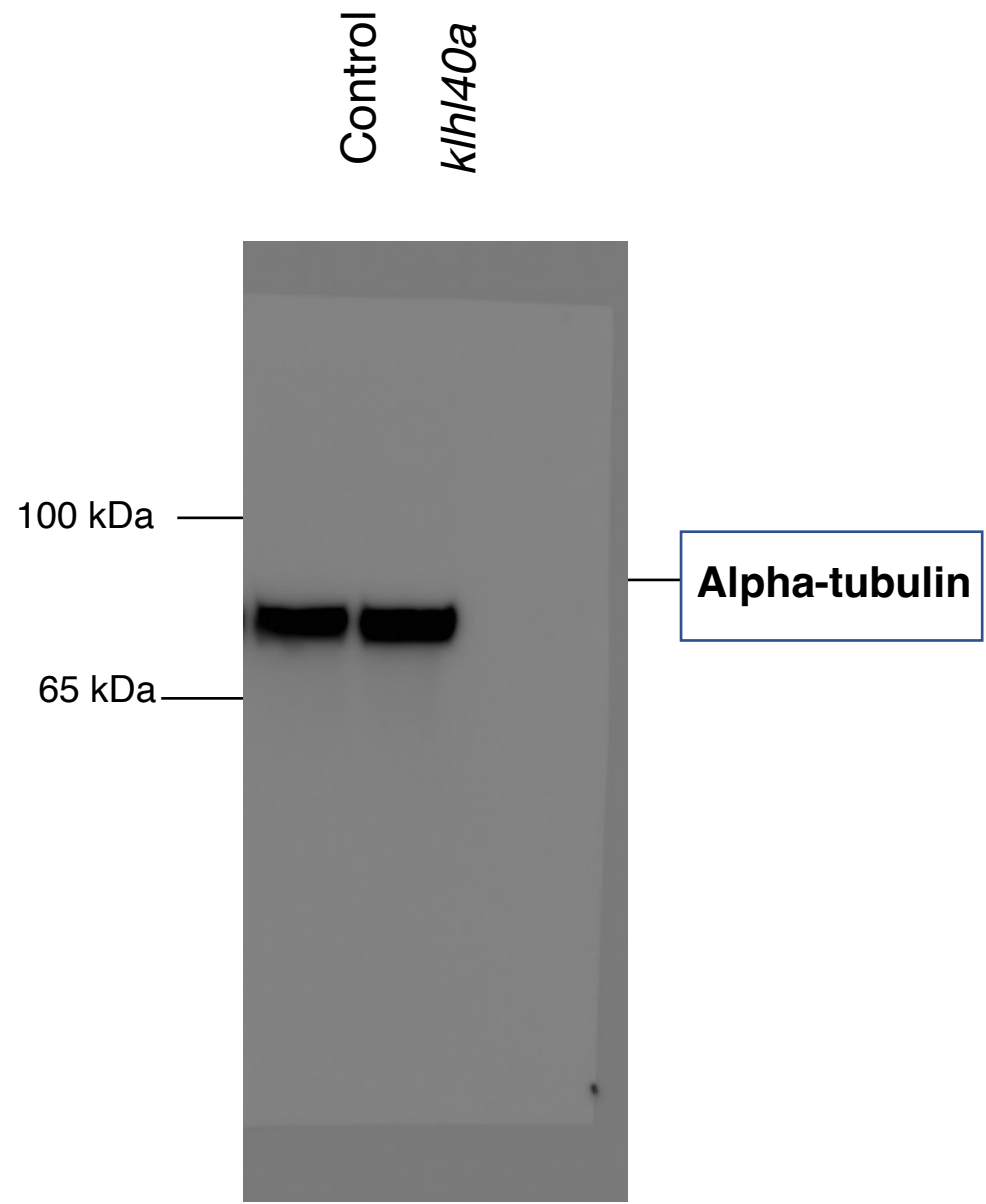

WB: Anti-alpha tubulin (ab18251, Abcam)
