# Supplementary material for: Dynamic regulation of inter-organelle communication by ubiquitylation controls skeletal muscle development and disease onset
Source: eLife journal article supplement (doi:10.7554/elife.81966), 2023-07-07

# Figure 7-figure supplement 1-Source data 6

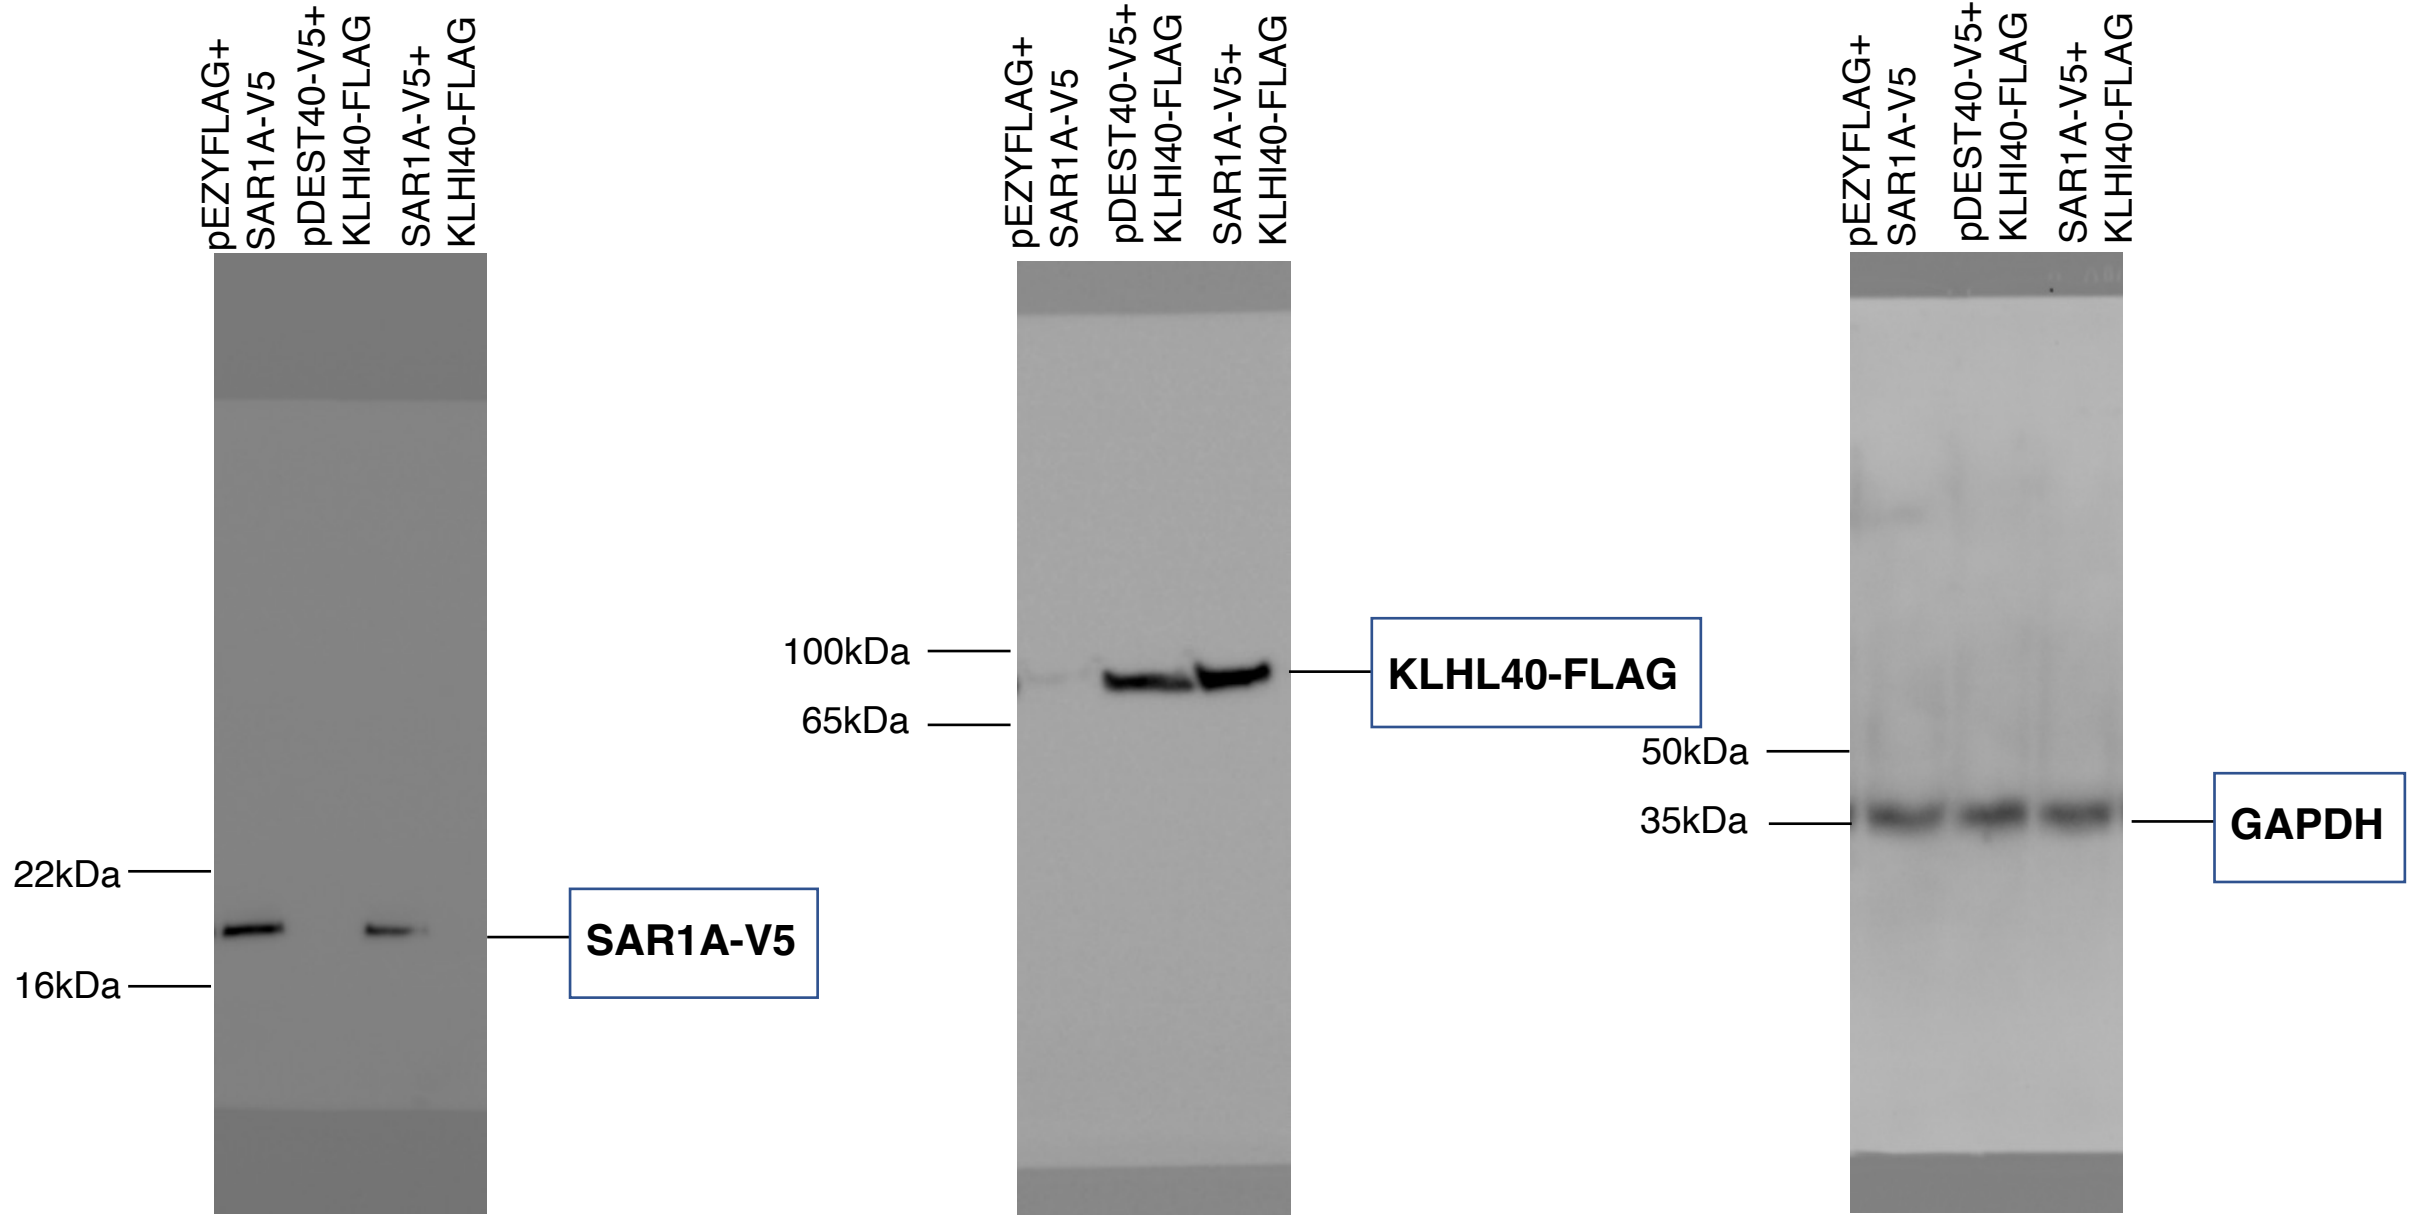

WB: Anti-V5: R960-25, Thermofisher Scientific

WB: Anti-FLAG: F1804, Sigma-Aldrich

WB: Anti-GAPDH: ab8245, Abcam

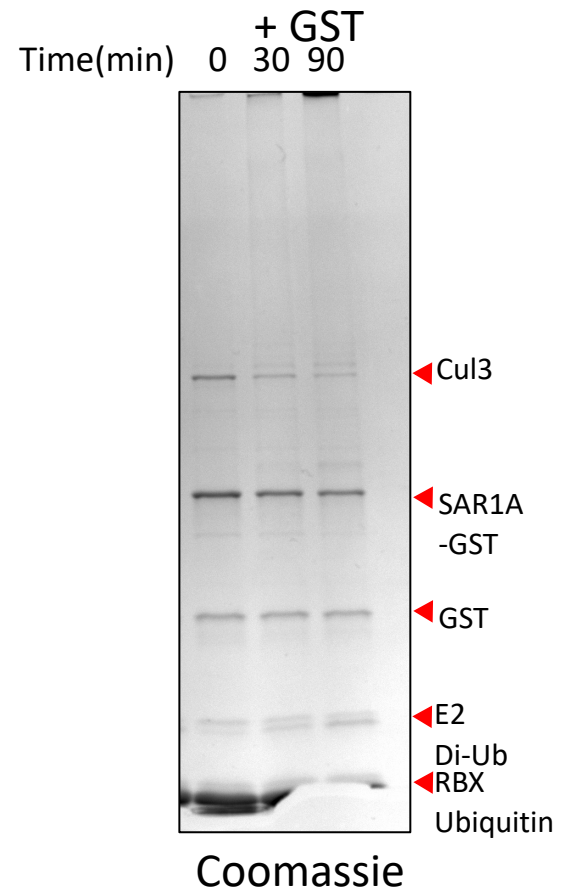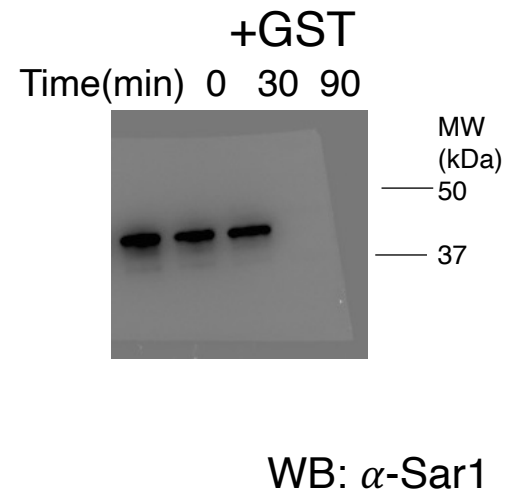

Supplement: supp [file elife-81966-supp-v1.zip]
