# Supplementary material for: Dynamic regulation of inter-organelle communication by ubiquitylation controls skeletal muscle development and disease onset
Source: eLife. 2023 Jul 11;12:e81966. doi: 10.7554/eLife.81966 (PMC10356137; doi:10.7554/eLife.81966)
Supplement: Supplementary file 1. [file elife-81966-supp1.xlsx]

## Sheet: Formatted data
											1.5 mo KO to 1.5 mo WT			4 mo KO to 4 mo WT			4 mo KO to 1.5 mo KO			4 mo WT to 1.5 mo WT			TMT Log2 Values
Primary accession number	Primary and Secondary Accession number	gene	Spectra Counts	Number of unique peptides	percent Coverage (%)	Score Unique	species	protein MW	Entry Name	subcellular location	Log2 fold-change	p-value	Adj p-value	Log2 fold-change	p-value	Adj p-value	Log2 fold-change	p-value	Adj p-value	Log2 fold-change	p-value	Adj p-value	Wild Type 4 month, rep 3	KLHL KO 1.5 month, rep 3	Wild Type 4 month, rep 4	Wild Type 1.5 months, rep 2	KLHL KO 4 months, rep 2	Wild Type 4 month, rep 1	KLHL KO 4 months, rep 1	KLHL KO 1.5 month, rep 1	Wild Type 4 month, rep 2	Wild Type 1.5 months, rep 1	KLHL KO 4 months, rep 4	KLHL KO 1.5 month, rep 4	Wild Type 1.5 months, rep 3	KLHL KO 1.5 month, rep 2	Wild Type 1.5 months, rep 4
G1K2X0	G1K2X0|A0A2R8PZT6|A0A2R8QPI1	ttn.1	7738	2012	70.3	39212.1	DANRE	3.26149e+06	Titin, tandem duplicate 1	NA	-0.349828	0.0265853	0.081255	-0.767257	0.000218753	0.00693939	0.153003	0.32923	0.722375	0.570433	0.00132938	0.012003	1.16689	-0.166248	0.858195	0.316599	-0.0535261	0.619776	0.0502669	0.0344744	0.590605	0.0665697	0.128091	-0.268939	0.0831393	-0.0448596	0.487432
F1R7N8	F1R7N8	ttn.2	166	88	73.7	36609.8	DANRE	2.94278e+06	Titin, tandem duplicate 2	NA	0.495247	0.000729316	0.00803007	0.168416	0.188643	0.426449	0.0277022	0.82294	0.956677	0.354533	0.00768981	0.0388225	0.427331	0.215882	0.175397	-0.210428	0.132232	-0.0226362	0.366698	0.375602	-0.020509	-0.317145	0.426005	0.268728	-0.254861	0.262226	-0.0761136
F1QZQ0	F1QZQ0	ttn.2	373	123	77	32551.3	DANRE	2.47153e+06	Titin, tandem duplicate 2 (Fragment)	NA	-0.241574	0.133977	0.24764	-0.516224	0.007572	0.0604711	0.070101	0.674454	0.906418	0.344751	0.0401565	0.120966	0.979404	-0.00374163	0.558187	0.474116	-0.0257149	0.45932	0.0888445	0.115046	0.360379	0.272393	0.156167	-0.226881	-0.0882287	0.127568	0.320007
B0S758	B0S758	ttn.2	384	174	57.1	7761.23	DANRE	853470	Titin, tandem duplicate 2 (Fragment)	NA	0.0298276	0.869291	0.91233	0.498587	0.022301	0.120452	0.452082	0.0351102	0.248279	-0.0166774	0.926663	0.955528	0.21766	-0.0777452	0.2549	0.204564	0.597955	-0.100292	0.311983	-0.179995	-0.496632	-0.0857217	0.49255	0.394911	-0.237618	-0.0755154	0.0611203
B0UY61	B0UY61|F1R8A4	neb	1738	11	66.2	8385.13	DANRE	713510	Nebulin	NA	-2.32763	8.00958e-09	1.26992e-05	-2.30405	2.26537e-08	4.78825e-05	0.463404	0.0305928	0.234439	0.439824	0.0272858	0.0928713	1.77321	-1.62384	1.40032	1.05671	-0.813057	1.11901	-0.9963	-1.3412	0.863633	0.77773	-1.23565	-1.64126	0.730641	-1.30733	0.83179
B0UY60	B0UY60	neb	14	5	67.4	505.49	DANRE	44188.5	Nebulin (Fragment)	NA	0.168731	0.760309	0.833802	-0.73773	0.229592	0.475211	0.591871	0.330204	0.722831	1.49833	0.0161798	0.0655565	2.01155	-0.931032	1.52912	-0.910334	-0.129735	-0.996364	0.271441	-0.343542	0.81326	-1.16355	0.163278	-0.0747894	-1.02235	-0.611477	0.460467
A2BGX6	A2BGX6|F1QAF1|E9QEL6|F1QXS0	myhc4	8176	18	85.2	6414.23	DANRE	223199	Myosin heavy chain 4	NA	-0.628766	0.00106869	0.0102227	-0.961182	5.15683e-05	0.0029459	0.0701069	0.671658	0.905539	0.402523	0.0187406	0.0724599	1.17786	-0.206239	0.892317	0.432222	-0.214045	0.624409	-0.196627	-0.0106965	0.621858	0.255682	0.0144617	-0.515536	0.362125	-0.0762359	0.656326
F1R6C7	F1R6C7	myha	215	27	84.6	5997.33	DANRE	223224	Myosin, heavy chain a	NA	-0.91302	0.00219549	0.0160272	-1.95517	4.48582e-06	0.000711115	-3.32324	1.07703e-08	6.83053e-05	-2.28109	3.52986e-07	7.99387e-05	-1.10518	0.705873	-1.33081	1.25869	-2.9018	-1.07867	-2.68094	0.619463	-0.438093	1.61206	-3.24732	0.481726	1.10446	-0.287522	1.19641
Q6IQX1	Q6IQX1	myhz2	23	11	82.7	5899.47	DANRE	222904	Myosin, heavy polypeptide 2, fast muscle-specific	NA	-0.880209	0.00228729	0.0162511	-0.114392	0.655626	0.835544	-2.31444	5.04716e-07	0.000800226	-3.08026	7.33973e-09	9.30825e-06	-1.67939	-0.111251	-1.53668	1.12917	-2.20367	-2.29638	-1.54275	0.814286	-1.81185	1.49931	-2.08998	0.300375	0.885545	0.472489	1.48271
B8A569	B8A569	myhz1.3	7	3	81.3	5789.67	DANRE	223240	Myosin, heavy polypeptide 1.3, skeletal muscle	NA	-1.42003	3.70604e-05	0.00151426	-0.715613	0.0132904	0.087331	-0.0799399	0.753606	0.936939	-0.784356	0.00484721	0.0283021	-0.41683	-0.875007	0.231202	0.63942	-0.450205	0.307217	-0.907991	-0.533171	0.146598	0.283161	-0.587503	-0.504766	1.14022	-0.361562	1.34281
B8A561	B8A561|A0A2R8Q2N5	myhz1.2	2	2	80.2	5714.54	DANRE	223183	Myosin, heavy polypeptide 1.2, skeletal muscle	NA	-0.779964	0.000963313	0.0095658	-0.0913334	0.652053	0.834443	-0.195093	0.342312	0.729772	-0.883724	0.000345962	0.00478067	-0.566389	-0.434053	-0.228934	0.946599	-0.164252	-0.122472	-0.414994	-0.0618151	-0.298555	0.750573	-0.607017	-0.0985691	0.599358	-0.206876	0.0220156
E7FAD0	E7FAD0	myhz1.1	395	44	82.9	4915.07	DANRE	188178	Myosin, heavy polypeptide 1.1, skeletal muscle	NA	-0.908194	0.00305987	0.0194355	-0.291668	0.299001	0.555673	0.0267816	0.922363	0.982895	-0.589745	0.0345777	0.108597	0.621423	-0.397368	0.684961	1.11442	-0.234868	-0.453771	-0.257358	-0.0952975	-0.341338	0.758256	0.00067895	-0.00720865	0.524132	-0.262648	0.473451
A0A0G2L6C1	A0A0G2L6C1|B6IDE1|A0A0N4STT5|F1QE01|A0A2R8QRQ3|A0A2R8Q3R0|A0A2R8QLD0|A0A2R8QLK5|A0A2R8PV50|A0A286Y9F5|Q9DGG8|F1Q6B3|F1QRY5	smyhc2	156	36	77.1	4287.58	DANRE	224213	Slow myosin heavy chain 2	NA	-0.251505	0.172097	0.294268	0.184932	0.34304	0.594242	0.113005	0.557892	0.861965	-0.323432	0.0859982	0.202418	0.488095	0.171275	0.126865	0.476147	0.0454581	-0.368155	0.00523318	-0.0215557	-0.220043	0.287019	0.524175	0.0752137	0.158862	0.0895378	0.398462
A0A2R8QHZ3	A0A2R8QHZ3|A0A0G2L354	LOC100329748	74	13	75.4	4031.13	DANRE	225863	Uncharacterized protein	NA	0.0445521	0.824543	0.880791	-0.640635	0.0101402	0.0739003	0.120814	0.579768	0.870064	0.806002	0.00130613	0.0118486	1.16195	0.240493	0.794055	0.0481744	-0.162482	0.597473	0.619245	-0.390593	0.582505	-0.0749904	-0.026679	0.328124	-0.0216942	-0.087835	-0.0395098
A0A0N4SU68	A0A0N4SU68|A0A2R8Q4Q8|A0A2R8QGS1|A0A2R8Q9I2	A0A0N4SU68	8	2	73.1	3853.92	DANRE	224180	Slow myosin heavy chain 3	NA	1.32354	0.0403904	0.107795	0.0217449	0.972867	0.987506	-0.343015	0.593713	0.876678	0.958775	0.122879	0.253638	0.364224	1.01567	0.813244	-1.28591	-1.22082	-0.880672	1.36311	-0.0965549	0.0443705	-1.255	0.178818	1.51411	-0.69092	-0.633012	-0.262104
A0A0R4INI3	A0A0R4INI3|A0A2R8Q7G9|A0A2R8Q8V2	smyhc1	54	17	72.3	3816.09	DANRE	223768	Slow myosin heavy chain 1	NA	0.180075	0.749475	0.826208	-0.00978806	0.987152	0.99386	-0.475053	0.440017	0.799685	-0.285191	0.614133	0.736715	-0.611185	-0.873914	-0.799559	0.394866	0.434078	0.724584	-1.91559	1.06547	-0.61696	0.150588	0.474809	-0.096093	-0.340198	0.462478	-0.367613
A0A2R8QK05	A0A2R8QK05|A0A2R8Q9M0|A0A0G2L365	LOC100329813	46	20	74.7	3741.84	DANRE	224789	Uncharacterized protein	NA	0.47291	0.118407	0.227007	0.863993	0.0143376	0.0914633	0.348762	0.274029	0.67334	-0.0423211	0.883264	0.929133	-0.218925	0.301592	-0.222399	-0.267289	0.125268	-0.637385	1.07044	-0.578954	-0.336319	-0.257716	0.335002	1.00151	-0.335109	-0.0782487	-0.38563
F1QVX3	F1QVX3	myhb	76	34	67.7	3599.99	DANRE	223742	Myosin, heavy chain b	NA	0.146112	0.720824	0.804937	-0.247064	0.577272	0.785679	0.688067	0.135577	0.497297	1.08124	0.0182734	0.0711958	1.08768	-0.0479426	1.05956	-0.407708	-0.5344	-0.442651	1.39112	-0.342451	1.1199	-0.499162	0.520457	0.0893339	-0.465977	-0.614974	-0.127636
F8W3L6	F8W3L6|A0A2R8QQT1|A4VCF3|A0A2R8RPV9	myh9a	188	98	62.4	2148.55	DANRE	228749	Myosin, heavy chain 9a, non-muscle (Fragment)	NA	0.0166969	0.927897	0.95378	-0.186745	0.356954	0.60634	0.112275	0.575554	0.869682	0.315717	0.104907	0.22836	0.564759	0.245291	0.424368	-0.29734	-0.0360072	-0.0603704	0.417027	-0.113426	0.414152	-0.238272	0.0659274	0.0165239	0.24728	-0.00156069	0.368373
F1QC64	F1QC64|A0A2R8QIT8|F1QJK4|A0A2R8QN33	myh9b	192	85	63	2037.14	DANRE	204482	Myosin, heavy chain 9b, non-muscle	NA	-0.178512	0.20095	0.325108	-0.0941611	0.521939	0.743734	-0.00592554	0.967589	0.99155	-0.0902766	0.507496	0.650371	0.210579	0.28635	0.178613	0.102079	0.082434	0.0978349	0.166823	-0.312896	0.0115982	0.441032	-0.157771	0.0546164	0.0771689	0.117613	0.239451
A0A2R8QM44	A0A2R8QM44|F1QSE1|E7F7P7|E9QDF3	myh7l	9	6	42.7	2259.11	DANRE	227505	Myosin heavy chain 7-like	NA	-0.521398	0.156421	0.274722	-0.565434	0.154893	0.381593	-0.0101231	0.978826	0.993871	0.0339124	0.923505	0.953446	-0.128294	-0.0714621	0.98025	0.335592	-0.106697	0.575383	0.302568	-1.15839	0.106792	0.33381	-0.741574	0.567121	0.629586	-0.0243814	0.0994932
B3DFS9	B3DFS9|E9QEW5	myh11a	167	80	54.8	1726.51	DANRE	228651	Myosin, heavy chain 11a, smooth muscle	NA	-0.76533	0.0112073	0.0452431	0.137579	0.630581	0.820545	-0.0631408	0.824685	0.956677	-0.96605	0.00255188	0.0185994	-0.707983	-0.0803398	-0.0443141	0.433254	-0.113115	-0.402508	-0.47228	-0.789415	-1.17469	0.859723	-0.748986	-0.547577	0.106329	-0.10928	0.135401
B8JLS3	B8JLS3	myh6	12	8	30.9	1575.44	DANRE	223828	Myosin, heavy chain 6, cardiac muscle, alpha	NA	-0.773209	0.00110081	0.0103774	-1.03031	0.000191063	0.00644432	0.0327182	0.872292	0.971381	0.289814	0.140999	0.279749	1.07174	-0.371493	0.465731	0.634691	-0.379033	0.843482	-0.380083	-0.447127	0.268341	0.680906	-0.344829	-0.556382	0.0626372	-0.227798	0.111804
I3ISA3	I3ISA3|F1R3G4	myh10	75	55	42.3	1148.55	DANRE	231364	Myosin, heavy chain 10, non-muscle	NA	-0.0738252	0.528685	0.650547	0.0880947	0.487174	0.71608	-0.191253	0.144726	0.507663	-0.353172	0.00861244	0.0422605	-0.153087	0.1486	-0.0693888	0.0177284	-0.0606439	-0.0583772	0.107456	-0.00060068	-0.355639	0.209551	-0.259897	0.29515	0.368421	0.0377476	0.180498
E7F5L1	E7F5L1|E9QF07	myh7bb	51	38	36.5	1206.33	DANRE	225728	Myosin, heavy chain 7B, cardiac muscle, beta b	NA	0.0717015	0.558181	0.676473	0.296634	0.0387365	0.168449	-0.0508244	0.699662	0.919501	-0.275757	0.0380657	0.116606	-0.178903	0.206388	0.171228	0.115851	0.0453765	-0.371803	0.199018	0.0917472	-0.0766487	0.0556644	0.303412	0.425222	0.221912	0.210349	0.253474
R4GDZ5	R4GDZ5|E7FD18	R4GDZ5	38	28	34.6	1152.04	DANRE	224887	Myosin, heavy chain 7B, cardiac muscle, beta a	NA	-0.00403615	0.96401	0.976438	0.0403708	0.677119	0.846838	-0.0719904	0.461128	0.814714	-0.116397	0.207708	0.361834	0.107102	0.174843	0.0584609	0.218632	0.206425	0.100145	-0.0188005	0.102275	0.0166866	0.0477137	0.145284	0.328805	0.157831	0.125916	0.323807
A0A0R4IHN7	A0A0R4IHN7|A0A2R8PYV3	A0A0R4IHN7	31	2	66.6	869.99	DANRE	63882	Zgc:66156	NA	0.965925	0.185351	0.308866	-0.764188	0.324225	0.57749	-0.021704	0.977219	0.993871	1.70841	0.0280815	0.0945142	1.54347	-0.223232	1.98193	-1.17776	-1.49676	-1.56219	0.943405	0.0855713	1.2656	-1.1369	0.682401	0.633747	-0.600062	-0.237209	-0.690099
R4GDM7	R4GDM7|A0A2R8Q9G7|A0A286Y9H2|E7F5R7|B8JLK6|F1QZR7|F1QKT3|E7FGI1|R4GEN4	R4GDM7	50	37	41.8	599.8	DANRE	119282	Myosin Ic, paralog b	NA	0.109692	0.277718	0.411036	-0.0835645	0.438542	0.678242	-0.111984	0.303726	0.700396	0.0812719	0.41635	0.57095	0.121213	0.245151	0.183414	-0.0482702	-0.00288955	0.215593	0.268295	0.0574698	0.0547462	0.0988729	-0.0848743	0.28883	0.0340317	0.0971937	0.165244
F1Q9G9	F1Q9G9	F1Q9G9	91	8	64.3	769.16	DANRE	63018	Zgc:66156	NA	-0.142751	0.521976	0.644418	-0.289931	0.23796	0.485334	0.832581	0.00360104	0.0715296	0.97976	0.000599262	0.00696111	1.26113	-0.366245	1.07855	0.222176	0.452637	0.0930638	0.345206	-0.23088	0.791474	-0.238317	0.75053	-0.360764	-0.388278	-0.307939	-0.290402
E9QFE1	E9QFE1|E7FGF6|A0A140LGG8	myh14	30	27	20.9	471.99	DANRE	234265	Myosin, heavy chain 14, non-muscle	NA	0.296297	0.0623326	0.146527	0.183778	0.262357	0.513717	0.154839	0.341526	0.729705	0.267358	0.0886897	0.206682	0.192458	-0.164474	0.288838	-0.0522694	0.118333	0.0776915	0.347349	0.202369	-0.362843	-0.0987664	0.232761	0.196335	-0.356963	0.0776704	-0.365289
A0A0R4IJY6	A0A0R4IJY6|A0A2R8QKR0	myh11b	30	25	20.8	541.88	DANRE	228510	Myosin, heavy chain 11b, smooth muscle	NA	-0.331125	0.306716	0.442492	0.526152	0.14168	0.363568	1.20211	0.00344495	0.0700574	0.34483	0.287961	0.443302	-0.321774	-0.387214	-0.00653869	-0.42292	0.0757674	0.539253	0.193306	-0.528399	0.00993803	-0.00626098	1.47504	-1.31172	-0.447144	-0.25561	-0.282116
A0A0H2UKD8	A0A0H2UKD8|A5PF48	myo1ca	35	28	34.1	456.32	DANRE	121190	Myosin Ic, paralog a	NA	0.254654	0.0511387	0.127485	0.230696	0.0947329	0.286168	0.163306	0.224175	0.622644	0.187263	0.13802	0.275443	0.212902	0.193969	0.181939	-0.0999898	0.184477	0.0424211	0.570188	0.0139098	-0.102208	-0.257383	0.188714	0.258683	-0.164536	0.138055	0.107911
F1R617	F1R617|B5DDQ9|Q503M0	myo1b	16	14	16.6	151.91	DANRE	129286	Myosin IB	NA	-2.0531	0.0111733	0.0451735	-0.413459	0.590306	0.7927	0.134653	0.86009	0.968517	-1.50499	0.0493287	0.139152	-1.41894	-1.26933	-1.06993	1.98859	-0.177416	1.42665	-1.53698	-1.14888	-1.45945	1.49473	-1.41724	-1.60236	0.953972	-0.693537	-0.939022
A0A0R4IPW9	A0A0R4IPW9|F1QKS0|A0A286YAD0|E7FB39|F8W4A0|A0A0R4IX49|A0A0R4IB90|A0A0R4IJN0	myo5b	14	11	6.6	129.06	DANRE	214350	Myosin VB	NA	-1.96289	1.48217e-05	0.000886787	-0.570282	0.0931195	0.282841	0.0910973	0.776595	0.944072	-1.30151	0.000651526	0.00743045	-0.0766336	-1.07308	-0.308152	1.44175	-0.575174	-0.0360089	-0.94861	-0.97378	-0.879285	1.28225	-1.16212	-1.48973	0.2414	-0.409004	0.940555
A0A2R8QSJ9	A0A2R8QSJ9|F1QYX4|A0A0R4IW90|F8W4K6|A0A2R8RZK3|Q1LXI2|A0A0R4IXQ5	A0A2R8QSJ9	7	7	6.4	116.89	DANRE	220274	Myosin VAa	NA	0.119281	0.214602	0.341275	-0.0538799	0.594404	0.795675	0.0557938	0.581528	0.870446	0.228955	0.0265107	0.0911629	0.184056	-0.0449104	0.390466	0.0532041	0.138443	0.0208458	0.107041	0.10555	0.0899243	-0.172181	0.106846	0.0945309	-0.0815069	0.0914267	-0.0300432
E7F9L8	E7F9L8	myo1d	9	7	9.9	66.59	DANRE	116624	Unconventional myosin-Id	SUBCELLULAR LOCATION: Cytoplasm {ECO:0000250|UniProtKB:Q63357}. Perikaryon {ECO:0000250|UniProtKB:Q63357}. Cell projection, dendrite {ECO:0000250|UniProtKB:Q63357}. Early endosome {ECO:0000250|UniProtKB:F1PRN2}. Cytoplasm, cell cortex {ECO:0000250|UniProtKB:Q63357}. Note=Colocalizes with the actin cytoskeleton in the cell cortex close to the apical cell membrane. Colocalizes with cytoplasmic punc…	-1.02373	3.86436e-05	0.00153173	-0.99539	0.000105072	0.00457968	0.0651765	0.723876	0.926826	0.0368371	0.828979	0.889434	0.466123	-0.445861	0.42722	0.635433	-0.0479173	0.772531	-0.461998	-0.136655	1.0746	0.368703	-0.4209	-0.487218	0.943964	-0.43206	0.645026
E7FCI5	E7FCI5	E7FCI5	6	3	4	77.82	DANRE	203361	Myosin VC	NA	-0.408546	0.590606	0.704197	1.48365	0.0867386	0.271878	-0.0535021	0.947696	0.987763	-1.9457	0.0210903	0.078246	-1.08489	-1.2539	-1.36096	0.464418	-0.621205	-2.64207	-1.12719	-0.788373	-4.8652	0.569998	-1.26549	-1.17828	-1.61198	-0.583954	-1.59276
A0A2R8QG39	A0A2R8QG39|E7F106|F1R527	myo7ab	3	3	1.5	31.75	DANRE	255025	Uncharacterized protein	NA	-1.5448	0.0290878	0.086668	-0.897132	0.209633	0.45091	0.507892	0.468071	0.817852	-0.139778	0.827583	0.888716	-0.522754	-1.95365	-0.580435	1.05193	-0.594784	1.1906	-1.40497	-1.16951	-1.0455	1.06028	-1.41021	-2.38679	-0.980393	-1.06823	-1.53079
F8W622	F8W622	myo15aa	3	2	0.7	29.48	DANRE	464339	Myosin XVAa	NA	0.60855	0.107156	0.212637	1.0306	0.0178249	0.104857	0.596018	0.140535	0.50326	0.17397	0.628765	0.748721	0.59708	0.322522	-0.0110527	-0.476792	0.26966	-0.816196	1.65905	0.182995	-0.778851	-0.0583382	0.406318	0.0365132	-0.964883	0.187272	-0.204884
F1QZ50	F1QZ50	ahnak	754	351	53.7	5646.85	DANRE	685496	AHNAK nucleoprotein	NA	0.250517	0.0385252	0.104521	-0.181569	0.146164	0.369253	0.074502	0.536702	0.852871	0.506588	0.000462145	0.00586712	0.457206	0.15597	0.433496	-0.229566	0.15128	0.367516	0.2947	-0.0636294	0.0253122	-0.168487	-0.0280395	0.14368	-0.184151	0.0232256	-0.160619
E7F4T0	E7F4T0|A0A0R4IJ71|A0A2R8QR17|E9QCV2|A0A0R4IR49	plecb	639	272	62.2	4718.31	DANRE	519284	Plectin b	SUBCELLULAR LOCATION: Cytoplasm, cytoskeleton {ECO:0000256|ARBA:ARBA00004245}.	-0.0154146	0.936887	0.958036	0.205009	0.338488	0.591608	0.0721954	0.731914	0.928917	-0.148228	0.451546	0.60368	0.128039	0.0733056	0.123112	0.499416	0.100738	-0.11596	0.299447	0.0289487	-0.221228	0.573344	0.150313	0.189726	-0.148906	0.153236	-0.41698
A0A2R8QKW7	A0A2R8QKW7|A0A2R8QEG3|A0A286YBE9|A0A2R8PZA9|A0A2R8PVX9|A0A0R4INC4|I3ISY3	A0A2R8QKW7	3	2	57.9	4362.42	DANRE	525332	Plectin a	NA	0.934542	0.0066291	0.0322406	0.462339	0.162612	0.390564	0.519531	0.120183	0.468721	0.991734	0.00454244	0.0272503	0.00916587	-0.556398	-0.0092081	-0.746898	0.423734	-0.389158	0.537292	-0.259756	-0.263453	-0.447795	-0.0634986	0.213968	-1.45677	-0.279234	-1.96813
I3ISA6	I3ISA6	eppk1	129	78	17	1319.79	DANRE	613647	Epiplakin 1	SUBCELLULAR LOCATION: Cytoplasm, cytoskeleton {ECO:0000256|ARBA:ARBA00004245}.	0.117972	0.367381	0.502248	-0.448978	0.00593988	0.0520231	-0.0517355	0.710624	0.922911	0.515215	0.00133851	0.0120219	0.704589	0.110685	0.614001	-0.164715	-0.0438804	0.107124	0.200633	-0.0615958	0.411678	-0.087997	-0.125642	0.0815738	-0.0216297	0.117759	0.0508754
F1R446	F1R446|F1QDX2	sptan1	391	170	69.5	3178.94	DANRE	285723	Spectrin alpha, non-erythrocytic 1	SUBCELLULAR LOCATION: Cytoplasm, cell cortex {ECO:0000256|ARBA:ARBA00004544}. Cytoplasm, cytoskeleton {ECO:0000256|ARBA:ARBA00004245}.	0.45278	0.00625577	0.030947	0.325851	0.0489305	0.195137	0.0257101	0.866391	0.970961	0.152639	0.29126	0.446862	0.141884	0.127286	0.111509	-0.124489	0.153867	-0.238644	0.539485	0.158808	-0.253253	-0.0464148	0.105323	0.47831	-0.317089	0.197655	-0.361068
F1R445	F1R445	sptan1	5	3	60.4	532.67	DANRE	55523.1	Spectrin alpha, non-erythrocytic 1 (Fragment)	NA	0.521228	4.72995e-05	0.00173395	0.379093	0.00144207	0.0219285	-0.0356585	0.710113	0.922855	0.106477	0.242314	0.397032	0.163908	0.31668	-0.0232489	-0.11107	0.280188	-0.105692	0.311741	0.472658	-0.152443	-0.1692	0.457242	0.342468	-0.19016	0.409725	-0.0729536
Q5RGQ4	Q5RGQ4|A0A0R4IA72|A0A2R8QEE5|A0A2R8QCC0	ryr3	382	170	42.8	3101.31	DANRE	568795	Ryanodine receptor 3	SUBCELLULAR LOCATION: Membrane {ECO:0000256|ARBA:ARBA00004141}; Multi-pass membrane protein {ECO:0000256|ARBA:ARBA00004141}. Sarcoplasmic reticulum membrane {ECO:0000256|ARBA:ARBA00004326}; Multi-pass membrane protein {ECO:0000256|ARBA:ARBA00004326}.	-0.0411615	0.861428	0.906316	-0.400233	0.133233	0.35098	-0.252062	0.331314	0.723093	0.107009	0.651118	0.766569	0.707536	0.0865768	-0.083287	0.411653	-0.123181	0.231715	0.274563	0.097899	0.0105262	0.356382	-0.702213	-0.19211	-0.186588	0.281442	-0.142994
F1QEX9	F1QEX9	ryr1b	148	87	33.8	2280.07	DANRE	580554	Ryanodine receptor 1b (skeletal)	SUBCELLULAR LOCATION: Membrane {ECO:0000256|ARBA:ARBA00004141}; Multi-pass membrane protein {ECO:0000256|ARBA:ARBA00004141}. Sarcoplasmic reticulum membrane {ECO:0000256|ARBA:ARBA00004326}; Multi-pass membrane protein {ECO:0000256|ARBA:ARBA00004326}.	0.250359	0.315833	0.451129	-0.157482	0.553859	0.768092	-0.326	0.23068	0.628694	0.0818402	0.738452	0.82676	0.635584	0.11564	-0.182609	0.350894	-0.116515	-0.0342039	0.332963	0.354674	-0.24736	0.143103	-0.560335	-0.0423942	-0.362053	0.417566	-0.287892
F1QCK4	F1QCK4	ryr1a	9	9	16.3	1077.12	DANRE	579588	Ryanodine receptor 1a (skeletal)	SUBCELLULAR LOCATION: Membrane {ECO:0000256|ARBA:ARBA00004141}; Multi-pass membrane protein {ECO:0000256|ARBA:ARBA00004141}. Sarcoplasmic reticulum membrane {ECO:0000256|ARBA:ARBA00004326}; Multi-pass membrane protein {ECO:0000256|ARBA:ARBA00004326}.	0.0254643	0.861364	0.906316	0.0328473	0.834834	0.927252	-0.0927379	0.55846	0.861965	-0.100121	0.496088	0.641978	0.0251517	-0.1068	-0.210131	0.141134	-0.180904	-0.393996	0.0640546	-0.314135	-0.133854	0.0350396	-0.319231	0.152415	-0.140627	0.0580316	-0.347892
A0A2R8Q4H1	A0A2R8Q4H1|A0A2R8PWZ0|A0A0G2KQB9|A0A2R8QS07	A0A2R8Q4H1	3	3	4.5	291.56	DANRE	498904	Uncharacterized protein	NA	-1.61478	0.0332848	0.0953013	0.211984	0.77659	0.902053	-0.762239	0.316625	0.711188	-2.589	0.00216711	0.0167377	-1.44168	-0.642513	-2.00527	-0.286358	-1.31127	-1.08574	-1.7666	-0.498218	-1.91925	-0.772273	-1.12513	-1.61792	2.54002	0.203606	2.42268
A0A0R4IKT8	A0A0R4IKT8|F8W5K5	ryr2b	3	3	2.3	144.96	DANRE	559504	Ryanodine receptor 2b (cardiac)	SUBCELLULAR LOCATION: Membrane {ECO:0000256|ARBA:ARBA00004141}; Multi-pass membrane protein {ECO:0000256|ARBA:ARBA00004141}. Sarcoplasmic reticulum membrane {ECO:0000256|ARBA:ARBA00004326}; Multi-pass membrane protein {ECO:0000256|ARBA:ARBA00004326}.	-1.81705	0.0392981	0.105829	-0.571966	0.51548	0.738009	-0.416571	0.634406	0.892916	-1.66166	0.0562549	0.151663	-2.07082	-1.32594	-1.78825	1.48811	0.222138	1.25585	-2.75751	-0.989789	-1.33785	1.18115	-2.13633	-2.1014	0.403546	-0.145525	-0.367259
Q5TZ29	Q5TZ29|A0A286YAF6	apobb.1	461	176	49.3	3039.94	DANRE	414182	Apolipoprotein Bb, tandem duplicate 1	NA	0.211847	0.486849	0.61324	0.252972	0.443033	0.683521	0.460611	0.173513	0.555175	0.419486	0.180135	0.327851	0.593299	-0.0157966	0.728071	-0.555967	0.0324317	-0.38132	1.29931	0.0060348	-0.132839	-0.12643	0.0325856	-0.142287	-0.149443	0.128706	-0.0388915
E7F1L7	E7F1L7|A0A0R4IUS4	flnca	401	125	63.3	2681.03	DANRE	294440	Filamin C, gamma a (actin-binding protein 280)	NA	1.9354	1.14507e-08	1.45241e-05	1.10304	1.46867e-05	0.00140384	-0.0206515	0.90138	0.979029	0.811713	0.000135225	0.00263025	-0.391364	0.533667	-0.412767	-1.10427	0.301542	-0.289399	0.835601	0.649381	-0.805455	-1.43786	0.747732	0.897555	-1.41204	0.515169	-1.19167
A0A2R8Q720	A0A2R8Q720|E9QI62|F1R1U1	flna	263	119	61.8	2338.67	DANRE	274284	Uncharacterized protein	NA	-0.131905	0.311999	0.447467	-0.203347	0.15728	0.384455	0.269266	0.0684689	0.351603	0.340708	0.0177536	0.0697064	0.463077	0.137865	0.409298	0.160494	0.151931	0.373915	0.327104	-0.446238	0.329449	-0.0863305	0.0927282	-0.00764171	-0.0795851	0.00130056	0.21833
F1QL44	F1QL44	flncb	75	54	33.3	1180.52	DANRE	300451	Filamin C, gamma b (actin-binding protein 280)	NA	0.66524	0.00118848	0.0108764	0.439609	0.0250827	0.128682	-0.213613	0.24002	0.641739	0.0120179	0.941468	0.965058	0.189266	0.436589	-0.0517749	-0.143203	-0.00171827	-0.479791	0.569862	0.414702	-0.523879	-0.274469	0.101049	0.512483	-0.300971	0.382933	-0.195608
A0A0G2L974	A0A0G2L974|F1QGL5	A0A0G2L974	58	38	25.1	628.04	DANRE	215735	Filamin B	NA	-0.168547	0.130636	0.243246	-0.149948	0.206616	0.447181	0.201795	0.0970607	0.421905	0.183196	0.103042	0.226019	0.233091	0.0654371	0.244077	0.0139895	0.150244	0.210036	0.198859	-0.252938	0.237771	0.257353	-0.105216	-0.0766904	0.0213937	-0.217805	-0.100546
Q1MTC4	Q1MTC4|A0A2R8RIU9|A0A2R8Q549|F1R876|F1R8J4|A0A0G2KTK1	vtg2	953	116	70.1	2620.82	DANRE	181320	Phosvitin	NA	-0.0427067	0.981661	0.985964	-3.38914	0.109086	0.313844	-2.83981	0.173023	0.554641	0.506618	0.785403	0.857627	-0.751873	2.36992	-0.00710066	-4.77956	-4.14695	-3.61573	-2.87673	-4.08062	1.74956	-3.78959	-5.11259	0.252629	1.71159	-3.36437	2.20594
F1Q7L0	F1Q7L0	vtg4	148	21	85.7	2594.41	DANRE	150033	Phosvitin (Fragment)	NA	-0.155477	0.924729	0.952824	-3.07656	0.101338	0.298182	-2.62375	0.156473	0.528408	0.297341	0.856682	0.910499	-1.04759	2.49251	-0.0445439	-4.02682	-3.64606	-2.85071	-3.03192	-3.43848	1.63839	-3.19603	-4.28004	0.0884737	1.38147	-3.25823	2.34757
Q1LWN2	Q1LWN2|A0A2R8Q212|A0A2R8QEH1|A0A2R8QIV8	vtg1	237	27	82.6	2580.05	DANRE	149917	Phosvitin	NA	0.129645	0.946582	0.964219	-3.01977	0.164794	0.392912	-2.7379	0.204847	0.599787	0.411513	0.831724	0.891927	-0.97178	2.52065	-0.309967	-5.45064	-4.25281	-3.49669	-2.50299	-4.30841	1.03563	-3.98951	-5.11062	0.360822	1.70971	-3.44335	2.34158
F1R2S5	F1R2S5|A0A2R8Q5K5|A0A2R8PZ72|A0A2R8QHD5|A0A2R8Q4P4	vtg5	110	24	82.8	2465.03	DANRE	150116	Phosvitin (Fragment)	NA	-0.383295	0.827049	0.882723	-2.93066	0.138799	0.359235	-2.57603	0.188936	0.57883	-0.0286648	0.986951	0.991738	-1.12802	2.38301	-0.260892	-4.25194	-3.84915	-3.37524	-3.18015	-4.05418	1.20875	-3.45597	-4.42923	0.0904646	1.88022	-3.39322	2.38694
F1QV15	F1QV15|A0A2R8QBG3|A0A2R8QKR3|A0A2R8RSX9	vtg6	85	19	80.1	2423.53	DANRE	150756	Phosvitin (Fragment)	NA	0.0273996	0.986945	0.989129	-3.02363	0.11239	0.318328	-2.53474	0.176942	0.559875	0.516291	0.758289	0.839281	-0.661356	2.41964	0.229158	-3.84839	-3.29963	-3.31482	-2.81843	-3.10806	1.9322	-3.37777	-4.31395	0.476489	1.16569	-3.55845	2.18049
F1R2T3	F1R2T3|A0A2R8RVB7|A0A2R8RHW2|Q1MTC6|A0A2R8QQ28|E9QFD8|A0A2R8QNH7|A0A2R8RN02|A0A2R8RUJ6|F1R743	vtg7	216	42	77.8	2323.47	DANRE	149730	Phosvitin	NA	0.11957	0.943448	0.962108	-3.23497	0.0934909	0.283262	-2.70608	0.153872	0.523474	0.648458	0.701271	0.801464	-0.600045	2.40093	0.454301	-4.15816	-3.53982	-3.4556	-2.88338	-3.24278	2.05818	-3.27313	-4.43908	0.325181	1.17725	-3.14204	2.11705
F1QKE8	F1QKE8|A0A2R8Q996	col6a3	296	64	37.7	2249.98	DANRE	407444	Collagen, type VI, alpha 3 (Fragment)	NA	-0.195351	0.541774	0.662539	-0.489127	0.170259	0.401791	0.152036	0.659061	0.898513	0.445813	0.176509	0.323387	0.342396	-0.553818	0.113685	0.0529241	-0.0541764	0.445245	0.762137	-0.381499	0.64198	0.13667	-1.01786	-0.212904	0.177975	0.126873	-0.607514
F1Q4X1	F1Q4X1	col6a3	8	4	42.5	2027.58	DANRE	311166	Collagen, type VI, alpha 3	NA	-0.515261	0.233878	0.363631	0.0197979	0.965236	0.985591	-0.369091	0.422522	0.787896	-0.904149	0.0474545	0.135201	-0.444649	-0.374617	-0.97328	0.702576	-0.333224	0.209191	-0.0265591	-0.368341	-1.06359	0.94698	-1.28507	-0.148885	0.617501	0.175074	-0.922784
F6NRG0	F6NRG0	col6a3	7	4	53.8	804.14	DANRE	88882	Collagen, type VI, alpha 3 (Fragment)	NA	-0.379975	0.0121193	0.0478286	-0.377741	0.0188604	0.10823	-0.173394	0.23961	0.641184	-0.175628	0.200609	0.353743	0.262509	-0.018709	0.0507218	0.279763	-0.258904	0.345539	0.237238	0.0301555	0.324918	0.461773	-0.373793	-0.02875	0.569975	0.183602	0.374689
A0A0G2L1F5	A0A0G2L1F5|A0A140LGS5|A0A140LG71	sptbn1	231	118	59	2181.4	DANRE	263535	Spectrin beta chain	NA	0.492707	0.00315298	0.0198572	0.252917	0.108988	0.313706	-0.128752	0.396657	0.77049	0.111039	0.428909	0.582878	0.0896321	0.373635	0.0657311	-0.31815	0.00806214	-0.265642	0.503024	0.142963	-0.192273	-0.19472	0.0207492	0.522487	-0.159118	0.185035	-0.0747201
F1QQE5	F1QQE5	sptb	177	110	49.7	1792.88	DANRE	273675	Spectrin beta chain	NA	0.649609	0.000495917	0.00638889	0.454117	0.0105422	0.0753646	-0.220293	0.170679	0.551988	-0.0248002	0.862656	0.913816	-0.0124956	0.286252	-0.0351341	-0.0262835	0.166384	-0.324575	0.278441	0.531932	-0.57895	-0.0152155	0.204159	0.521371	-0.437552	0.406929	-0.372902
F1QXB0	F1QXB0	sptbn2	54	46	29.8	844.68	DANRE	274804	Spectrin beta chain	NA	-0.215154	0.0144184	0.0537258	-0.128545	0.142096	0.364201	0.0576555	0.495447	0.829321	-0.0289526	0.709753	0.807273	0.142611	-0.0164847	0.127024	0.0121662	0.0392937	0.121679	0.0387506	-0.129619	0.107173	0.137393	-0.0898155	-0.0236835	0.263228	-0.0765294	0.201511
Q5BJA1	Q5BJA1	Q5BJA1	17	7	63.4	205.01	DANRE	15509.8	40S ribosomal protein S17	NA	-0.177048	0.213144	0.339723	0.298819	0.061718	0.225045	-0.336654	0.0384723	0.26203	-0.812521	4.63982e-05	0.00133732	-0.258322	0.266281	-0.217934	0.278024	-0.324468	-0.638459	0.19965	0.298195	-0.32643	0.365598	-0.0595832	0.15539	0.704093	0.380881	0.461222
Q6P6F0	Q6P6F0	rps17	14	6	64.9	190.57	DANRE	15484.7	40S ribosomal protein S17	NA	-0.737953	0.177121	0.300027	-0.347362	0.544557	0.75941	-0.464983	0.419976	0.785422	-0.855574	0.122001	0.252154	-0.529285	0.314493	-0.485235	-0.67872	-0.59899	-0.388855	-0.697015	-0.360242	0.464486	-0.467569	-0.450248	-0.0617717	1.72401	-0.360887	1.90569
F1RAJ3	F1RAJ3|A0A2R8Q1V1	sptbn4b	7	4	8.6	124.75	DANRE	143060	Spectrin, beta, non-erythrocytic 4b (Fragment)	NA	0.0938701	0.569736	0.686933	-0.291312	0.117911	0.327248	0.107049	0.548696	0.857576	0.492231	0.00927362	0.0443135	0.302736	0.143054	0.511452	-0.134336	0.0415929	0.49987	0.333618	0.0510345	0.735446	-0.350149	0.287982	0.376823	0.258024	-0.11485	0.307041
A0A0R4IZA6	A0A0R4IZA6|F1R5K7|F1RCP6	hspg2	262	129	47.4	2167.72	DANRE	386606	Heparan sulfate proteoglycan 2	SUBCELLULAR LOCATION: Membrane {ECO:0000256|ARBA:ARBA00004370}. Secreted, extracellular space, extracellular matrix, basement membrane {ECO:0000256|ARBA:ARBA00004302}.	0.554855	0.000153521	0.0033073	0.442973	0.00183688	0.025822	0.137048	0.248111	0.65194	0.248929	0.0339446	0.107353	0.271493	0.262658	-0.0450763	-0.228782	0.344768	-0.128266	0.506942	0.291383	-0.114851	-0.356891	0.464684	0.432738	-0.332809	0.220222	-0.0939349
E7EYD0	E7EYD0|F8W488	myom1a	400	115	71.2	2155.21	DANRE	167460	Myomesin 1a (skelemin)	NA	-0.525644	0.00312689	0.0197321	-0.943529	4.50455e-05	0.00274648	0.126433	0.433738	0.795019	0.544318	0.00245005	0.0181493	1.16124	-0.209197	0.964669	0.309449	-0.147848	0.654042	-0.122801	-0.0304882	0.729325	0.113877	0.0720204	-0.48204	0.303277	-0.0488464	0.605402
A0A0R4IGQ8	A0A0R4IGQ8|A0A140LH33	myom1b	24	9	65.3	2153.15	DANRE	182528	Myomesin 1b	NA	0.386956	0.145113	0.261982	0.23899	0.391327	0.637238	0.174275	0.529082	0.848672	0.322242	0.21915	0.373424	0.568649	0.253142	0.682352	-0.298488	0.250985	-0.604703	0.654731	0.0530765	-0.204796	-0.369306	0.14238	0.334226	-0.294772	0.0599163	0.115101
A0A0R4IUZ8	A0A0R4IUZ8	myom1b	25	3	68	2039.61	DANRE	162954	Myomesin 1b	NA	-0.573669	0.00249811	0.0171357	-1.07193	2.20891e-05	0.001773	0.162073	0.34509	0.730738	0.660338	0.000869774	0.00904138	1.27055	-0.28666	1.10891	0.228733	-0.165852	0.659551	-0.14659	-0.126392	0.877434	0.0116197	0.033972	-0.437617	0.398563	-0.168916	0.636174
A0A0R4INP3	A0A0R4INP3|E7EYE1	myom2a	533	7	72.2	2116.05	DANRE	165806	Myomesin 2a	NA	-0.400435	0.0177435	0.0617614	-0.938439	5.57329e-05	0.00310002	0.0959175	0.557047	0.861965	0.633921	0.000885393	0.00914377	1.26282	-0.17815	0.967814	0.328561	-0.102802	0.614944	-0.112179	0.0142536	0.755631	0.0902489	0.100568	-0.37622	0.162701	0.00389592	0.484011
A0A2R8RZT9	A0A2R8RZT9|A0A0R4IPK3	myom2a	9	2	70.8	2014.33	DANRE	155009	Myomesin 2a	NA	-0.148304	0.625529	0.732503	-0.563612	0.102365	0.300154	0.0382081	0.906911	0.980838	0.453517	0.150551	0.291494	1.1372	0.00388099	1.05952	0.0307643	-0.311367	-0.347541	0.200808	0.178814	0.69083	-0.217471	0.324731	-0.236655	0.257139	0.186692	0.655514
A0A0R4IJB9	A0A0R4IJB9	A0A0R4IJB9	3	3	86.6	245.88	DANRE	14780.9	Myomesin 2a (Fragment)	NA	-1.16177	0.0172374	0.0605412	-0.408361	0.389985	0.636196	-0.243861	0.604264	0.881135	-0.997274	0.0356864	0.111417	-0.746423	-0.229807	-0.397082	1.40422	0.0800135	1.10147	-1.13374	-0.328648	-0.673642	1.15619	-0.708116	-0.812097	0.734024	-0.00312468	-0.021013
F1R0H8	F1R0H8|A0A0R4IXX0|F1QXP9|A0A0R4IF13|F1QDK4|F1QVF5|F1QC58|F1R7V2	dmd	232	142	40.9	2041.77	DANRE	419596	Dystrophin	SUBCELLULAR LOCATION: Cell junction, synapse, postsynaptic cell membrane {ECO:0000256|PIRNR:PIRNR002341}. Cytoplasm, cytoskeleton {ECO:0000256|ARBA:ARBA00004245}.	0.477959	0.00275977	0.0181199	0.298485	0.0525388	0.20421	-0.0708539	0.620668	0.888585	0.108619	0.416446	0.570959	0.131018	0.214153	-0.118867	0.0432446	0.0524965	-0.191796	0.454451	0.200975	-0.1849	-0.068402	0.115099	0.312834	-0.42727	0.384849	-0.346595
A0A140LGL3	A0A140LGL3|A0A2R8QPD1	utrn	2	2	6.6	50.07	DANRE	62008	Utrophin	NA	-0.171924	0.168252	0.289331	-0.300257	0.0347479	0.155825	-0.122314	0.353872	0.737756	0.00601918	0.960008	0.976486	0.0558752	0.319846	0.285587	0.233885	-0.0058924	0.500014	0.0531199	-0.067373	0.333164	0.228656	-0.0670181	0.242392	0.461335	-0.0319959	0.226687
F1R6I7	F1R6I7|F1Q699	mybpc2b	603	106	78.2	2012.06	DANRE	125890	Myosin-binding protein Cb	NA	-0.380992	0.132517	0.245665	-0.536996	0.0564918	0.213732	0.117583	0.653898	0.898513	0.273587	0.269718	0.427036	0.564974	-0.397773	0.480834	0.642053	0.155424	0.884643	-0.479049	0.368607	0.30263	0.331647	0.387448	-0.512295	0.00881736	0.156226	0.156215
A0A0R4IGP9	A0A0R4IGP9|Q0IJ38|F1QNZ9	A0A0R4IGP9	204	77	70.6	1485.06	DANRE	127441	Myosin-binding protein Ca	NA	-0.225236	0.333024	0.46799	0.0249728	0.919348	0.966444	0.659461	0.0174747	0.175912	0.409252	0.0909354	0.20949	0.81519	-0.160009	1.01836	-0.00148441	0.270746	-0.108281	0.395602	-0.241385	0.11721	-0.193171	0.790427	-0.236482	0.0668213	-0.0576024	0.333302
X1WF98	X1WF98|X1WFI8	col12a1a	275	108	44.9	1922.04	DANRE	323097	Collagen, type XII, alpha 1a	NA	0.0309381	0.86479	0.909123	0.225674	0.262046	0.513484	0.228329	0.256751	0.659584	0.0335929	0.85333	0.908185	0.466181	0.0568039	-0.0206363	0.0601676	0.170248	-0.0818045	0.481868	-0.286478	-0.260217	0.0695147	0.102549	0.464257	-0.0196318	-0.141679	-0.140899
E7FG81	E7FG81|I3IT32|I3ISL8	col12a1b	160	82	29.5	1366.64	DANRE	396390	Collagen, type XII, alpha 1b	NA	-0.332164	0.0137611	0.05224	-0.325904	0.0225956	0.121526	-0.0862924	0.504873	0.836006	-0.0925527	0.441181	0.594587	0.528295	0.0485112	0.281965	0.367328	-0.159606	0.0855297	0.177762	-0.0432723	0.137332	0.388223	-0.221026	0.164983	0.348115	-0.0955453	0.299665
A0A0R4IDZ8	A0A0R4IDZ8|Q5U7N6	tln1	229	104	56.1	1888.07	DANRE	273534	Talin 1	SUBCELLULAR LOCATION: Cell junction, focal adhesion {ECO:0000256|ARBA:ARBA00004246}. Cytoplasm, cytoskeleton {ECO:0000256|ARBA:ARBA00004245}. Membrane {ECO:0000256|ARBA:ARBA00004287}; Peripheral membrane protein {ECO:0000256|ARBA:ARBA00004287}; Cytoplasmic side {ECO:0000256|ARBA:ARBA00004287}.	0.259148	0.143813	0.260407	0.127358	0.491354	0.718914	-0.105442	0.567705	0.865477	0.0263478	0.876682	0.925833	0.164944	0.510696	0.179565	-0.225524	0.000992785	-0.262175	0.374726	0.104235	0.0861188	-0.206937	0.132696	0.366939	0.0451914	0.117782	0.450331
A0A0R4IIA7	A0A0R4IIA7|F1QUA3|A0A0R4IKN2|A0A0R4IID7|A0A2R8QS77|A0A2R8QEM1	tln2a	106	72	47.7	1569.77	DANRE	273574	Talin 2a	SUBCELLULAR LOCATION: Cell junction, focal adhesion {ECO:0000256|ARBA:ARBA00004246}. Cytoplasm, cytoskeleton {ECO:0000256|ARBA:ARBA00004245}. Membrane {ECO:0000256|ARBA:ARBA00004287}; Peripheral membrane protein {ECO:0000256|ARBA:ARBA00004287}; Cytoplasmic side {ECO:0000256|ARBA:ARBA00004287}.	0.523898	0.00021325	0.00394294	0.189117	0.112366	0.318328	-0.177574	0.133814	0.494746	0.157207	0.150179	0.290952	0.159262	0.195246	-0.0542396	-0.0419223	0.0186059	-0.0715913	0.162425	0.464929	-0.0641147	-0.238645	0.363307	0.428873	-0.274491	0.347032	-0.104454
A0A2R8QGP7	A0A2R8QGP7|A0A2R8QBL2|A0A2R8PXH2	tln2b	2	2	18	388.77	DANRE	164026	Talin 2b	NA	0.472274	0.108168	0.213774	0.703502	0.0334539	0.152302	0.0221948	0.941259	0.986526	-0.209032	0.458459	0.610473	0.0848644	0.312205	0.111305	-0.199609	0.355293	-1.32929	0.633354	0.277956	-0.371691	-0.361409	-0.00675156	0.581374	-0.210978	0.0488793	0.103313
A0A2R8QI77	A0A2R8QI77|Q1L8A2	prx	227	132	34.6	1845.91	DANRE	445843	Periaxin	NA	0.477246	0.00647976	0.0317021	0.413468	0.0220483	0.119699	-0.384149	0.0311841	0.236247	-0.320371	0.0485743	0.137504	-0.123392	0.267329	-0.490999	0.128415	0.0895832	-0.186315	-0.135338	0.546138	-0.742917	0.0509584	0.128441	0.306995	-0.151848	0.526385	-0.289662
F8W4U4	F8W4U4	xirp2a	189	118	41.6	1815.6	DANRE	374002	Xin actin-binding repeat-containing 2a	NA	0.72678	0.000156952	0.00331797	0.486155	0.00620944	0.0536758	-0.128865	0.402135	0.773841	0.11176	0.431771	0.586015	0.0509548	0.296108	-0.156041	-0.0854909	0.0501055	-0.221277	0.658326	0.536506	-0.3958	-0.364443	0.208412	0.448782	-0.399871	0.45652	-0.319397
F1QP52	F1QP52|A0A2R8RU90|A0A2R8Q317|F8W5W5|F8W4Y1	xirp2b	77	64	23.3	844.92	DANRE	368038	Xin actin-binding repeat-containing 2b	NA	-0.413548	0.0150418	0.0552695	0.0490853	0.762781	0.893221	-0.269199	0.115006	0.459614	-0.731833	0.000270078	0.00416683	0.10619	0.0758954	-0.169529	0.789338	-0.233621	-0.289035	0.106795	0.286581	-0.378941	0.586316	-0.274404	-0.14768	0.428551	0.327028	0.391811
F8W3Z4	F8W3Z4	xirp2a	5	5	12.3	98.76	DANRE	89338.9	Xin actin-binding repeat-containing 2a	NA	0.13395	0.350651	0.485841	-0.0506175	0.740184	0.88202	-0.163855	0.292828	0.68811	0.0207122	0.88327	0.929133	0.0377254	-0.104508	-0.0574533	-0.0159038	-0.152	-0.127767	-0.0910546	0.0825742	0.102738	0.084006	0.0576351	0.490212	0.125039	-0.0600837	-0.320746
Q8AX99	Q8AX99|E9QCQ2|A5PLJ3	actn3b	665	37	81.8	1684.56	DANRE	104543	Actinin alpha 3b	NA	-0.036293	0.819174	0.877123	-0.491231	0.0120059	0.0815752	0.0942533	0.584433	0.871301	0.549192	0.00376716	0.0240076	0.949865	-0.0524221	0.742027	0.150044	-0.173499	0.337294	0.453998	0.128065	0.508896	0.000784297	0.149368	-0.0961471	-0.0399743	0.216648	0.230462
D1GJ56	D1GJ56|A0A2R8Q5Z6	actn3a	132	25	75.5	1445.69	DANRE	104164	Actinin alpha 3a	NA	-0.906961	4.15947e-05	0.00158912	-1.78432	6.29265e-08	6.90918e-05	-0.704224	0.000783141	0.0309558	0.173139	0.26688	0.424238	1.23907	-0.212608	0.871723	0.700966	-0.932821	0.751486	-0.634492	0.0607483	0.721121	0.635364	-1.09811	-0.506901	0.723908	-0.0782431	0.830603
B8JHU4	B8JHU4	actn1	47	26	56.6	946.79	DANRE	104716	Alpha-actinin cytoskeletal isoform	SUBCELLULAR LOCATION: Cell junction {ECO:0000256|ARBA:ARBA00004282}. Cell membrane {ECO:0000256|ARBA:ARBA00004236}. Cell projection, ruffle {ECO:0000256|ARBA:ARBA00004466}. Cytoplasm, myofibril, sarcomere, Z line {ECO:0000256|ARBA:ARBA00004216}. Membrane {ECO:0000256|ARBA:ARBA00004370}.	-0.00866146	0.941055	0.96013	-0.079938	0.530732	0.750672	0.199656	0.131912	0.489806	0.270932	0.0349209	0.109458	0.242103	0.111618	0.367243	-0.116938	0.245106	0.132074	0.348669	-0.271152	0.416335	0.124899	0.034727	0.0967062	0.0980098	0.102207	-0.0319446
A0A2R8QBL5	A0A2R8QBL5|E9QFR8	actn2b	32	21	52	865.94	DANRE	104025	Actinin, alpha 2b	NA	0.758248	0.000901326	0.00917661	0.719427	0.00238449	0.0306695	0.335836	0.102068	0.433259	0.374657	0.0539305	0.147593	0.140527	0.181983	-0.0953475	-0.448988	0.447847	-0.603638	0.625019	-0.156074	-0.40021	-0.625655	0.366414	0.496134	-0.895201	0.0536526	-0.487452
A0A140LFP0	A0A140LFP0	obscnb	244	99	53	1613.61	DANRE	186367	Obscurin, cytoskeletal calmodulin and titin-interacting RhoGEF b (Fragment)	NA	0.696976	0.000567675	0.00689692	0.422097	0.0244121	0.126725	0.196134	0.257539	0.660133	0.471013	0.00902104	0.0435967	0.225164	0.201838	-0.054556	0.03784	0.37976	0.270986	0.480856	0.340639	-0.205094	-0.459417	0.58305	0.229175	-0.727793	0.3687	-0.498181
A0A140LGX4	A0A140LGX4	obscnb	139	66	68.7	1108.01	DANRE	113776	Obscurin, cytoskeletal calmodulin and titin-interacting RhoGEF b (Fragment)	NA	0.788516	6.5746e-05	0.00203396	0.644654	0.000758773	0.0146242	0.196689	0.203846	0.598345	0.340551	0.0266195	0.0914379	0.206816	0.1895	-0.151886	-0.209026	0.382007	-0.16214	0.639449	0.537806	-0.330119	-0.456482	0.58451	0.213203	-0.669833	0.414025	-0.46419
A0A2R8RK22	A0A2R8RK22|A0JMP4|F1QDJ6	atp2a1l	871	44	61.8	1565.6	DANRE	110627	Calcium-transporting ATPase	SUBCELLULAR LOCATION: Endoplasmic reticulum membrane {ECO:0000256|ARBA:ARBA00004477}; Multi-pass membrane protein {ECO:0000256|ARBA:ARBA00004477}. Membrane {ECO:0000256|RuleBase:RU361146}; Multi-pass membrane protein {ECO:0000256|RuleBase:RU361146}. Sarcoplasmic reticulum membrane {ECO:0000256|ARBA:ARBA00004326}; Multi-pass membrane protein {ECO:0000256|ARBA:ARBA00004326}.	1.22744	0.000476902	0.00628797	0.416812	0.16828	0.398604	-0.546955	0.0779078	0.379085	0.263668	0.336842	0.49374	0.365133	0.601624	-0.623384	-0.370657	0.134609	-0.399648	0.653814	0.787464	-0.704976	-0.549303	-0.560142	0.434965	-0.941198	0.668141	-0.556389
Q5U3A4	Q5U3A4|Q642Z0|E9QF60|E9QGF0	atp2a1	101	29	58.6	1204.79	DANRE	111696	Calcium-transporting ATPase	SUBCELLULAR LOCATION: Endoplasmic reticulum membrane {ECO:0000256|ARBA:ARBA00004477}; Multi-pass membrane protein {ECO:0000256|ARBA:ARBA00004477}. Membrane {ECO:0000256|RuleBase:RU361146}; Multi-pass membrane protein {ECO:0000256|RuleBase:RU361146}. Sarcoplasmic reticulum membrane {ECO:0000256|ARBA:ARBA00004326}; Multi-pass membrane protein {ECO:0000256|ARBA:ARBA00004326}.	1.31775	0.0029329	0.0190189	1.62298	0.00112007	0.0182661	-0.0328669	0.933899	0.985128	-0.338091	0.3647	0.522818	-0.572181	-0.110339	-1.54094	-0.341283	0.755894	-0.833195	0.332234	0.435358	-2.26187	-0.753978	-0.125342	0.438997	-1.4309	0.651166	-1.32967
A9C3Q4	A9C3Q4|A9C3Q5	A9C3Q4	48	20	49.4	922.97	DANRE	116425	Calcium-transporting ATPase	NA	0.278401	0.23788	0.367781	0.451749	0.085996	0.270487	-0.60732	0.0267985	0.220723	-0.780668	0.00421693	0.0258603	-0.0313253	0.654016	-0.717888	0.297917	0.0464813	-0.817652	0.127175	-0.0753467	-0.836611	0.1008	-0.621018	0.527083	0.12644	0.727046	0.194039
A0A0R4IQS8	A0A0R4IQS8|Q6ZM60|A0A0R4IVG9	atp2a2b	5	3	31.6	582.6	DANRE	115846	Calcium-transporting ATPase	SUBCELLULAR LOCATION: Endoplasmic reticulum membrane {ECO:0000256|ARBA:ARBA00004477}; Multi-pass membrane protein {ECO:0000256|ARBA:ARBA00004477}. Membrane {ECO:0000256|RuleBase:RU361146}; Multi-pass membrane protein {ECO:0000256|RuleBase:RU361146}. Sarcoplasmic reticulum membrane {ECO:0000256|ARBA:ARBA00004326}; Multi-pass membrane protein {ECO:0000256|ARBA:ARBA00004326}.	0.098196	0.347945	0.482859	0.157461	0.172079	0.40458	-0.133299	0.24281	0.646475	-0.192564	0.0786958	0.1905	-0.0273211	0.242577	-0.299272	0.0948592	0.0844452	-0.294754	-0.0645843	0.130668	0.0179849	0.153727	0	0.0406105	-0.139162	0.145823	0.057471
A0A2R8QJH4	A0A2R8QJH4|F1Q4P9|A2BIP1	atp2a3	16	10	28.1	472.19	DANRE	111991	Calcium-transporting ATPase	SUBCELLULAR LOCATION: Endoplasmic reticulum membrane {ECO:0000256|ARBA:ARBA00004477}; Multi-pass membrane protein {ECO:0000256|ARBA:ARBA00004477}. Membrane {ECO:0000256|ARBA:ARBA00004141, ECO:0000256|RuleBase:RU361146}; Multi-pass membrane protein {ECO:0000256|ARBA:ARBA00004141, ECO:0000256|RuleBase:RU361146}. Sarcoplasmic reticulum membrane {ECO:0000256|ARBA:ARBA00004326}; Multi-pass membrane pr…	0.610343	0.00192575	0.0148038	0.0576874	0.739329	0.88202	-1.19945	9.13487e-06	0.00295427	-0.646796	0.00124862	0.0115248	-0.355762	0.775045	-0.434849	0.0798357	-0.521381	-0.574673	-0.486576	0.843805	-0.901357	-0.0176297	-0.518962	0.202456	0.223165	0.940612	0.0351728
A0A0R4II06	A0A0R4II06|A0A0R4IPJ7|A0A0R4IXL3	si:dkey-151j17.4	291	87	34.7	1562.81	DANRE	287347	Si:dkey-151j17.4	NA	0.697182	0.0323104	0.0931422	-0.223311	0.489305	0.717715	0.933079	0.0109064	0.133272	1.85357	2.58493e-05	0.000981177	1.23382	-0.651901	0.774905	-0.541141	1.22946	0.359955	0.818832	-0.187157	0.918035	-1.27546	-0.253189	-0.139256	-1.09234	-0.36053	-1.21863
Q503C7	Q503C7	pygma	585	52	78.8	1546.96	DANRE	97443.8	Alpha-1,4 glucan phosphorylase	NA	1.16089	4.74805e-06	0.000470502	1.07142	2.398e-05	0.0018648	0.27782	0.119677	0.468514	0.367288	0.0335054	0.106442	-0.266778	0.346247	-0.0708858	-0.727788	0.544596	-0.464429	0.798745	0.526109	-0.72171	-1.02004	0.728076	0.193952	-0.778491	0.584301	-0.466633
E7EXT3	E7EXT3|F8W3T2|A0A1D5NSS4	pygmb	54	28	66.5	1055.77	DANRE	97376.9	Alpha-1,4 glucan phosphorylase	NA	0.583553	0.00197094	0.0149465	0.781672	0.00035914	0.00929512	0.335976	0.0598023	0.330177	0.137857	0.377034	0.534217	0.000125367	0.237663	-0.269545	0.0264477	0.593805	-0.263553	0.514445	0.000902198	-0.494353	-0.391408	0.466272	0.394667	-0.655318	0.122225	-0.558476
F8W5B8	F8W5B8|E7F2Z5	F8W5B8	40	27	46.7	608.99	DANRE	98551.1	Alpha-1,4 glucan phosphorylase	NA	-2.09436	6.68649e-09	1.26992e-05	-0.0477626	0.78203	0.904238	-0.0933776	0.590177	0.875124	-2.13997	5.16044e-09	8.18059e-06	-1.54281	-1.24565	-1.1989	0.836277	-1.41519	-1.91481	-1.69147	-1.39501	-1.2548	0.729974	-1.47012	-1.63344	0.65676	-1.45477	0.425558
B8JKW4	B8JKW4	c3a.1	211	81	53.7	1471.5	DANRE	184714	Complement component c3a, duplicate 1	SUBCELLULAR LOCATION: Secreted {ECO:0000256|ARBA:ARBA00004613}.	-0.129688	0.693818	0.785749	0.502609	0.172519	0.405164	0.925813	0.0197892	0.187882	0.293517	0.378929	0.536106	-0.0434088	-0.26118	0.181902	-0.281206	0.11872	0.806734	1.56101	-0.489169	-0.616454	-0.273802	0.0746727	-0.398629	-0.264264	-0.215066	-0.0260203
F1QV29	F1QV29	c3a.2	94	46	47.1	1280.88	DANRE	186907	Complement component c3a, duplicate 2 (Fragment)	SUBCELLULAR LOCATION: Secreted {ECO:0000256|ARBA:ARBA00004613}.	0.120617	0.668677	0.766257	0.440187	0.163072	0.390645	0.715307	0.0320524	0.238284	0.395737	0.174677	0.321424	-0.0328486	-0.101521	0.357415	-0.526038	0.277498	0.866634	0.968237	-0.334355	-0.695891	-0.417834	0.446308	-0.269926	-0.0132282	0.100631	-0.130538
F1QX13	F1QX13	c3a.3	33	24	33.1	821.3	DANRE	186170	Complement component c3a, duplicate 3	SUBCELLULAR LOCATION: Secreted {ECO:0000256|ARBA:ARBA00004613}.	-0.224145	0.532799	0.65472	0.538128	0.178112	0.412805	1.50072	0.0016346	0.048363	0.738444	0.0549309	0.149383	0.545026	-1.0106	0.397493	-0.459251	-0.35611	-0.82609	0.845055	-0.740369	-0.58198	-0.831223	0.776276	-1.55572	-1.29805	-1.00922	-0.830805
F1Q4X5	F1Q4X5|A0A2R8RSM2|X1WBY4	c4	57	43	28.6	646.83	DANRE	192870	C4a anaphylatoxin	SUBCELLULAR LOCATION: Cell junction, synapse {ECO:0000256|ARBA:ARBA00004547}. Cell projection, axon {ECO:0000256|ARBA:ARBA00004489}. Cell projection, dendrite {ECO:0000256|ARBA:ARBA00004279}. Secreted {ECO:0000256|ARBA:ARBA00004613}.	0.08676	0.781693	0.849323	-0.0163398	0.961405	0.984536	-0.11585	0.732126	0.929	-0.0127499	0.967467	0.980956	0.117044	0.603463	0.294849	-0.352846	-0.516987	-0.0365548	0.99879	0.00215466	-0.0161451	-0.240432	-0.261427	0.230377	0.536774	-0.0787616	0.466697
F1QYN0	F1QYN0	c3a.4	44	36	22.3	477.81	DANRE	183721	Complement component c3a, duplicate 4	SUBCELLULAR LOCATION: Secreted {ECO:0000256|ARBA:ARBA00004613}.	-1.29383	0.000662353	0.00764157	-0.555816	0.0996265	0.294926	-0.436853	0.186675	0.575263	-1.17486	0.00140971	0.0124498	-0.814616	-0.550806	-0.328968	0.605877	-0.719534	0.122344	-0.484784	-0.634355	-0.475712	1.33223	-1.58584	-0.784797	0.953858	-0.00284442	0.31054
A0A0R4IMB2	A0A0R4IMB2|F1QA48	c3a.6	23	22	18.3	342.21	DANRE	184192	Complement component c3a, duplicate 6	SUBCELLULAR LOCATION: Secreted {ECO:0000256|ARBA:ARBA00004613}.	-0.254463	0.340825	0.47525	-0.222457	0.437886	0.677558	0.520236	0.0841302	0.393881	0.48823	0.0804372	0.193821	0.465449	-0.104221	0.781659	-0.0413221	-0.101792	0.351576	1.19461	-0.414245	0.375408	-0.27833	-0.279615	-0.209109	0.162848	-0.269104	0.177976
A0A1L1QZU5	A0A1L1QZU5|E7EZ79|F1QVS1|F1Q615|E9QCH0|A0A1D5NSX5|E9QBD5	mybpc3	198	89	61.8	1417.35	DANRE	145962	Myosin-binding protein C3	NA	0.411584	0.0450523	0.116249	0.0244979	0.904501	0.961033	0.401859	0.0662864	0.34543	0.788946	0.000966389	0.00966541	0.712889	0.266717	0.701459	-0.344283	0.230264	0.0604968	0.677651	-0.233891	0.348462	-0.489557	0.533059	0.402752	-0.43738	-0.121716	-0.061256
F1REL9	F1REL9|F1QEB6|F1QD37|F1QKX8|A0A2R8QG26	lamb1b	201	9	49.8	1397.82	DANRE	204862	Laminin, beta 1b	SUBCELLULAR LOCATION: Membrane {ECO:0000256|ARBA:ARBA00004370}. Secreted, extracellular space, extracellular matrix, basement membrane {ECO:0000256|ARBA:ARBA00004302}.	0.316744	0.0025272	0.017271	0.472597	0.000189623	0.00642994	0.27448	0.0103487	0.130221	0.118627	0.184871	0.334074	0.114486	0.129489	0.00700072	-0.0955598	0.407527	-0.0194612	0.501028	0.167924	-0.212617	-0.206942	0.426291	0.236063	-0.232283	0.148397	-0.0503151
A0A2R8QMV5	A0A2R8QMV5	lamb1b	5	4	46	1298.27	DANRE	205417	Laminin, beta 1b	SUBCELLULAR LOCATION: Membrane {ECO:0000256|ARBA:ARBA00004370}. Secreted, extracellular space, extracellular matrix, basement membrane {ECO:0000256|ARBA:ARBA00004302}.	0.556228	0.703539	0.79195	1.29008	0.418656	0.661689	1.89203	0.242411	0.645683	1.15818	0.432543	0.586443	1.2076	-1.85332	1.02088	-2.4218	-2.89149	-2.82145	1.7312	-4.89549	-4.02354	-1.98101	1.56815	-1.00816	-2.85503	0.732641	-1.9914
B7ZDA6	B7ZDA6	lamb2	72	60	42.4	927.07	DANRE	203786	Laminin, beta 2 (laminin S)	SUBCELLULAR LOCATION: Membrane {ECO:0000256|ARBA:ARBA00004370}. Secreted, extracellular space, extracellular matrix, basement membrane {ECO:0000256|ARBA:ARBA00004302}.	0.69694	0.00268228	0.0178654	0.45869	0.0418597	0.176484	-0.133523	0.522128	0.846889	0.104726	0.586782	0.715546	-0.143439	-0.0686313	-0.514363	-0.226706	-0.00294477	-0.0158511	-0.0263326	0.317143	-0.916653	-0.3879	0.212619	0.29076	-0.80052	0.239277	-0.594086
A0A0R4IDN1	A0A0R4IDN1|A0A0R4IY30	lamb1a	33	25	19	403.69	DANRE	204286	Laminin, beta 1a	SUBCELLULAR LOCATION: Membrane {ECO:0000256|ARBA:ARBA00004370}. Secreted, extracellular space, extracellular matrix, basement membrane {ECO:0000256|ARBA:ARBA00004302}.	-0.00345063	0.974119	0.981704	-0.022468	0.845061	0.931271	-0.438092	0.00191713	0.0510858	-0.419075	0.00150528	0.0131293	-0.312084	0.140615	-0.259902	0.374227	-0.128711	0.0612471	-0.0387979	0.381932	-0.0495157	0.283957	-0.320086	0.340349	0.197844	0.239346	0.260016
A0A0R4IAS2	A0A0R4IAS2|A0A286YAI4	ppl	163	107	59.1	1387.99	DANRE	207763	Periplakin	SUBCELLULAR LOCATION: Cytoplasm, cytoskeleton {ECO:0000256|ARBA:ARBA00004245}.	0.105089	0.455105	0.585333	-0.637036	0.000855708	0.0155921	0.105384	0.48735	0.82643	0.847508	3.37642e-05	0.0011151	1.0322	-0.126957	0.93926	-0.139095	0.116645	0.397608	0.184101	0.0950931	0.470583	-0.0757667	-0.0821109	-0.076112	-0.185266	-0.0220449	-0.150247
F1QAU9	F1QAU9	dspb	154	97	46	1387.3	DANRE	252488	Desmoplakin b	SUBCELLULAR LOCATION: Cytoplasm, cytoskeleton {ECO:0000256|ARBA:ARBA00004245}.	-0.128186	0.398807	0.532023	-0.728033	0.000526909	0.0119754	0.617047	0.00191163	0.0510858	1.21689	1.6844e-06	0.000186904	1.02751	-0.457159	1.2443	-0.0440864	0.38379	0.811303	0.276598	-0.248408	1.09001	-0.600383	0.285359	-0.245576	-0.224559	-0.256051	0.174578
F8W4Q1	F8W4Q1	dspa	131	85	42.2	1170.71	DANRE	236393	Desmoplakin a	SUBCELLULAR LOCATION: Cytoplasm, cytoskeleton {ECO:0000256|ARBA:ARBA00004245}.	0.00254161	0.979208	0.984642	-0.392135	0.00228107	0.0295189	0.337916	0.00618476	0.0993715	0.732592	3.93431e-06	0.000301052	0.689147	-0.150295	0.766618	-0.152955	0.250658	0.365514	0.109148	-0.240673	0.445132	-0.0896343	0.163597	-0.0994502	-0.212082	-0.163373	-0.209286
Q1LVF0	Q1LVF0	lamc1	197	78	50	1356.01	DANRE	181965	Laminin subunit gamma-1	SUBCELLULAR LOCATION: Secreted, extracellular space, extracellular matrix, basement membrane {ECO:0000250}.	0.632982	0.000577809	0.00697993	0.682096	0.000589039	0.0127478	0.0675613	0.66129	0.900546	0.0184474	0.896824	0.937018	0.066683	0.210066	-0.0935908	-0.135124	0.292157	-0.480247	0.541541	0.407657	-0.498987	-0.323461	0.457985	0.459411	-0.502213	0.374865	-0.119132
A0A0R4IV67	A0A0R4IV67|A0A0R4IA63	agla	186	82	58.6	1338.86	DANRE	175660	4-alpha-glucanotransferase	SUBCELLULAR LOCATION: Cytoplasm {ECO:0000256|ARBA:ARBA00004496}.	0.369486	0.00699095	0.0334869	0.760606	3.95665e-05	0.00243584	0.722941	6.45321e-05	0.00998202	0.33182	0.0130578	0.0560593	0.115948	-0.100117	0.0756941	-0.208554	0.62484	-0.23878	0.726509	0.134022	-0.180108	-0.261487	0.760035	-0.132093	-0.557475	0.0216043	-0.52701
A0A0R4IH04	A0A0R4IH04|A0A2R8RZY5	aglb	92	40	51	750.93	DANRE	113239	4-alpha-glucanotransferase	SUBCELLULAR LOCATION: Cytoplasm {ECO:0000256|ARBA:ARBA00004496}.	0.218582	0.249258	0.380055	0.443919	0.0411957	0.175317	0.968387	0.000277204	0.0194337	0.74305	0.00128424	0.0117171	0.473491	-0.363176	0.0760694	-0.214419	0.823551	0.231156	0.89779	0.0817098	0.439459	-0.871895	0.52555	-0.529303	-0.524374	-0.0669263	-0.141336
A0A2R8Q449	A0A2R8Q449	A0A2R8Q449	351	68	56.2	1313.22	DANRE	123045	Uncharacterized protein	NA	-0.402178	0.0448366	0.115968	-0.971061	0.000267922	0.0077575	0.258502	0.208952	0.604827	0.827386	0.00054202	0.0064726	1.39589	-0.215359	1.1654	0.142585	-0.086747	0.58509	-0.0350087	-0.0567685	0.874035	-0.120168	0.223882	-0.492551	0.166549	-0.133161	0.521904
X1WFS0	X1WFS0	obscnb	170	78	58.5	1259.71	DANRE	165239	Obscurin, cytoskeletal calmodulin and titin-interacting RhoGEF b (Fragment)	NA	0.928584	5.02224e-06	0.000490016	0.690703	0.000194099	0.00647779	0.0952361	0.489938	0.827984	0.333118	0.0189071	0.0728813	0.104211	0.314417	-0.184534	-0.270753	0.374581	-0.296596	0.53328	0.517671	-0.385388	-0.675011	0.592515	0.382009	-0.687307	0.405462	-0.461708
B8JI08	B8JI08|F1Q5B8|A0A0R4IP01|F1RAH0|E7FGK9|Q6PBQ6	ogdha	195	43	62.3	1228.63	DANRE	116809	Oxoglutarate (alpha-ketoglutarate) dehydrogenase a (lipoamide)	NA	0.471401	0.0076536	0.0354818	0.524056	0.00641457	0.054744	0.165125	0.324465	0.719245	0.112471	0.464557	0.615494	0.140876	0.206359	-0.107933	0.138399	0.533481	-0.0322615	0.134124	0.288126	-0.335618	-0.26745	0.653359	0.201345	-0.45545	0.404955	-0.200318
E7EZ05	E7EZ05|A0A2R8Q9W1	ogdhb	4	4	25.7	469.46	DANRE	116867	Oxoglutarate (alpha-ketoglutarate) dehydrogenase b (lipoamide)	NA	-0.155075	0.381493	0.515101	-0.00660755	0.97203	0.987224	-0.216911	0.261882	0.661743	-0.365378	0.0526351	0.145429	-0.612264	-0.253519	-0.13223	0.071031	-0.293549	-0.0328551	-0.474808	0.35284	-0.115626	0.306574	0.0788039	-0.133755	0.24814	-0.0173269	-0.0572071
A0A1D5NSS9	A0A1D5NSS9|A0A2R8RIE3|E7FDY1|A0A1D5NSL7	ehbp1l1a	119	83	24.5	1227.39	DANRE	479097	EH domain-binding protein 1-like 1a	NA	0.260832	0.484435	0.611401	0.739685	0.0815379	0.265144	-0.0587721	0.88294	0.973741	-0.537625	0.161964	0.306938	-0.491183	0.227	-0.428857	-0.578257	0.0147841	-0.726959	0.412133	0.363921	-0.512769	-0.67162	0.172313	0.257209	1.50466	0.185932	-0.264048
E7FDY6	E7FDY6|A0A0R4IVQ0|A0A2R8QKL4	ehbp1l1b	29	24	20.7	534.75	DANRE	265305	EH domain-binding protein 1-like 1b	NA	0.722741	8.73608e-06	0.00070132	0.388394	0.0037546	0.0396138	-0.100409	0.377933	0.756944	0.233938	0.0390493	0.118702	0.0888962	0.26434	-0.0918689	-0.343276	0.0667784	-0.32666	0.398223	0.425574	-0.180037	-0.368756	0.317927	0.401538	-0.420266	0.354089	-0.313124
A0A2R8Q251	A0A2R8Q251|A0A2R8QT34	A0A2R8Q251	2	2	28.6	246.25	DANRE	78596	EH domain-binding protein 1-like 1b	NA	-0.546864	0.420658	0.552571	0.134931	0.861527	0.937942	0.327293	0.652272	0.898513	-0.354502	0.625766	0.746844	-1.34604	-1.29223	-1.44153	0.340991	1.06472	0.0970515	-1.95133	-1.26074	NA	0.0665716	-1.39912	-1.148	-0.62518	-0.655833	-1.95173
P13104	P13104|A0A1D5NSX9|A0A1D5NSG3|A0A1D5NSE7|A0A1D5NSA5|A0A1D5NS40|A0A1I7Q3W7|A0A1D5NSY1|A0A1D5NSL6	tpma	1129	22	94.3	1227	DANRE	32779.2	Tropomyosin alpha-1 chain	SUBCELLULAR LOCATION: Cytoplasm, cytoskeleton {ECO:0000250|UniProtKB:P04692}. Note=Associates with F-actin stress fibers. {ECO:0000250|UniProtKB:P04692}.	-1.26282	6.35287e-07	0.000149222	-1.15255	4.00648e-06	0.000686624	0.158639	0.312001	0.705926	0.0483723	0.734476	0.824741	1.12428	-0.548297	0.880187	0.709142	-0.359496	0.550862	-0.507006	-0.353636	0.63234	0.558577	-0.200411	-0.726581	0.782699	-0.428594	0.943762
Q7ZVK9	Q7ZVK9|A0A2R8RYF6	tpm1	23	3	92.6	1046.97	DANRE	32806.1	Tpm1 protein	SUBCELLULAR LOCATION: Cytoplasm, cytoskeleton {ECO:0000256|ARBA:ARBA00004245}.	-1.1174	0.000516943	0.00656019	-0.0983688	0.713841	0.86836	0.23112	0.394589	0.769363	-0.787914	0.00651727	0.0348449	0.0491601	-0.594068	0.104019	0.49306	0.0491103	0.25004	-0.514328	-0.00892053	-0.564937	0.85507	0.0488233	-0.947656	0.924936	0.0709729	0.71687
Q6IQD7	Q6IQD7|A0A0R4INL7	tpm2	90	21	92.9	974.53	DANRE	32646.1	Tropomyosin 2 (beta)	SUBCELLULAR LOCATION: Cytoplasm, cytoskeleton {ECO:0000256|ARBA:ARBA00004245}.	0.317478	0.0850847	0.180669	0.560534	0.00943316	0.0703424	0.344531	0.0837866	0.393881	0.101475	0.561253	0.694556	0.191432	0.014579	0.0633981	-0.329715	0.389099	-0.229247	0.181212	0.0564967	-0.713786	-0.297276	0.59514	0.139153	-0.398628	-0.0344195	-0.0684847
E7FBZ3	E7FBZ3|Q6NYQ0	E7FBZ3	27	8	80.6	881.51	DANRE	33065.4	Tropomyosin 1 (alpha)	NA	-0.821126	0.149721	0.267323	-0.15087	0.798477	0.909982	-0.582129	0.333108	0.724018	-1.25238	0.0363352	0.112997	-1.25613	0.327639	-0.698347	0.29881	0.489023	0.44981	-1.37333	-1.45679	-1.34248	0.718456	-1.70366	-0.131457	0.138624	0.138498	1.00651
A0A2R8Q650	A0A2R8Q650	tpm3	44	10	85.9	873	DANRE	33016.4	Tropomyosin 3	SUBCELLULAR LOCATION: Cytoplasm, cytoskeleton {ECO:0000256|ARBA:ARBA00004245}.	0.420866	0.0151842	0.0555673	0.124055	0.458494	0.69305	0.126561	0.449669	0.806277	0.423371	0.0147097	0.0611235	0.43211	0.197676	0.368529	-0.225421	0.164338	-0.213719	0.419145	-0.0457674	-0.0605418	-0.192343	0.183467	0.288126	-0.533286	0.076321	-0.216056
F1R412	F1R412|A0A2R8Q7U4	tpm4a	8	6	82.3	719.37	DANRE	32755.1	Tropomyosin 4a	SUBCELLULAR LOCATION: Cytoplasm, cytoskeleton {ECO:0000256|ARBA:ARBA00004245}.	-0.350504	0.224471	0.353333	-0.190414	0.532205	0.752109	-0.648029	0.0481091	0.294506	-0.808119	0.0115849	0.0519271	-0.848644	0.418657	-0.380869	0.204145	-0.0641854	0.196116	-0.741581	-0.428898	-0.622753	0.896528	-1.00759	0.175795	0.0990633	0.00875661	0.37659
A0A2R8RQ88	A0A2R8RQ88|A0A2R8QH41|A7E2K1	tpm1	5	4	87	741.45	DANRE	28547.4	Tropomyosin 1 (alpha)	SUBCELLULAR LOCATION: Cytoplasm, cytoskeleton {ECO:0000256|ARBA:ARBA00004245}.	-1.27065	0.00364766	0.0215395	-0.25964	0.513998	0.737029	-0.0138465	0.971997	0.992077	-1.02485	0.0135242	0.0575164	-0.869719	-0.85697	-0.769564	0.492922	-0.385424	0.532549	-1.40711	-0.997449	-1.41108	0.501511	-0.87474	-1.35597	0.307476	-0.290589	0.279693
A0A2R8RR81	A0A2R8RR81	A0A2R8RR81	27	10	87.5	733.42	DANRE	28777.6	Tropomyosin 3	NA	0.452215	0.0734479	0.163728	0.196017	0.448182	0.686289	0.133495	0.603245	0.880952	0.389694	0.117138	0.24644	0.476787	0.39662	0.41588	-0.375686	-0.134437	-0.351954	0.714045	0.0374538	0.110331	-0.316255	0.496726	0.63144	-0.220423	-0.164383	0.00463226
Q7T3F0	Q7T3F0|Q1LXM2	tpm4a	10	7	88.3	689.63	DANRE	28615.4	Tropomyosin 4	SUBCELLULAR LOCATION: Cytoplasm, cytoskeleton {ECO:0000256|ARBA:ARBA00004245}.	-0.0956358	0.608305	0.717743	0.524321	0.0195957	0.110719	0.0988231	0.623773	0.889718	-0.521133	0.0134978	0.0574824	-0.0586126	-0.0867114	-0.219317	0.15211	-0.110021	-0.904183	0.391759	0.109868	-0.441609	0.432862	0.0734328	0.153894	-0.109564	-0.0987811	-0.014597
A0A0R4IAL5	A0A0R4IAL5|A0A0R4IMN8	tpm2	16	7	68.1	585.38	DANRE	29016	Tropomyosin 2 (beta)	SUBCELLULAR LOCATION: Cytoplasm, cytoskeleton {ECO:0000256|ARBA:ARBA00004245}.	-0.823952	0.0616939	0.14583	-0.0242352	0.956396	0.982743	0.0197625	0.964437	0.991322	-0.779954	0.0749649	0.183747	-0.858573	0.0851409	-0.269092	0.329952	0.583491	0.466141	-0.774206	-1.22022	-0.933513	0.736467	-1.07827	-0.464662	0.01322	-0.171288	0.445142
A0A286Y9C2	A0A286Y9C2	tpm4b	5	3	72.8	526.32	DANRE	28854.7	Tropomyosin 4b	SUBCELLULAR LOCATION: Cytoplasm, cytoskeleton {ECO:0000256|ARBA:ARBA00004245}.	-0.0895593	0.637321	0.742465	0.0588101	0.773786	0.900245	-0.353464	0.101476	0.43192	-0.501834	0.0181934	0.0710351	-0.470099	0.375346	-0.391423	0.0749947	-0.0207448	0.255213	-0.027586	-0.00612808	-0.306875	0.532581	-0.460127	0.343441	0.0161727	0.0232541	0.470402
Q7SXW1	Q7SXW1	tpm4b	3	2	64.5	427.27	DANRE	28787.7	Tropomyosin 4b	SUBCELLULAR LOCATION: Cytoplasm, cytoskeleton {ECO:0000256|ARBA:ARBA00004245}.	-0.131615	0.607927	0.717447	-0.236164	0.398371	0.643405	-0.446614	0.122773	0.472382	-0.342065	0.19518	0.347359	-0.738815	0.245713	-0.26301	-0.00695374	-0.0693695	0.699177	-0.32472	-0.0247377	-0.243616	0.276754	-0.7241	0.062345	0.0519494	0.0122181	0.500247
B8JL43	B8JL43|A0A2R8RRA6|A0A0R4IHQ0|Q6P3G0|E7FBJ1|X1WE71|Q29443	tfa	326	65	87.6	1200.59	DANRE	75392	Serotransferrin	SUBCELLULAR LOCATION: Secreted {ECO:0000256|PIRNR:PIRNR002549}.	0.702834	0.0162515	0.0581971	-0.802049	0.0120669	0.081761	-0.0480605	0.863766	0.970334	1.45682	7.33279e-05	0.00179492	1.0251	-0.111283	1.45727	-0.525877	-0.0666908	0.160613	0.562166	0.488962	0.858789	-0.581394	-0.275297	0.145975	-0.819702	-0.0378416	-0.398549
A0A286YAZ4	A0A286YAZ4|F1R966|A0A2R8PXZ0|E9QD79|Q5EAQ7	cltca	130	21	49.1	1198.61	DANRE	194055	Clathrin heavy chain	SUBCELLULAR LOCATION: Cytoplasmic vesicle membrane {ECO:0000256|PIRNR:PIRNR002290}; Peripheral membrane protein {ECO:0000256|PIRNR:PIRNR002290}; Cytoplasmic side {ECO:0000256|PIRNR:PIRNR002290}. Membrane, coated pit {ECO:0000256|ARBA:ARBA00004277, ECO:0000256|PIRNR:PIRNR002290}; Peripheral membrane protein {ECO:0000256|ARBA:ARBA00004277, ECO:0000256|PIRNR:PIRNR002290}; Cytoplasmic side {ECO:00002…	0.177629	0.332554	0.467641	0.0816304	0.675427	0.846249	-0.147094	0.454078	0.808467	-0.0510953	0.776695	0.852228	0.0493422	0.33792	0.0648743	-0.272479	-0.0693827	-0.236378	0.242395	0.0772907	0.154778	-0.251462	0.0963415	0.457642	0.231139	0.0746617	0.529801
E9QBV1	E9QBV1|F1R4U8	cltcb	14	13	40.8	977.9	DANRE	193402	Clathrin heavy chain	SUBCELLULAR LOCATION: Cytoplasmic vesicle membrane {ECO:0000256|PIRNR:PIRNR002290}; Peripheral membrane protein {ECO:0000256|PIRNR:PIRNR002290}; Cytoplasmic side {ECO:0000256|PIRNR:PIRNR002290}. Membrane, coated pit {ECO:0000256|ARBA:ARBA00004277, ECO:0000256|PIRNR:PIRNR002290}; Peripheral membrane protein {ECO:0000256|ARBA:ARBA00004277, ECO:0000256|PIRNR:PIRNR002290}; Cytoplasmic side {ECO:00002…	0.100417	0.527697	0.649836	0.0355602	0.834805	0.927252	-0.234545	0.184159	0.571959	-0.169689	0.29284	0.448743	0.0519205	0.434421	0.0952971	-0.0347206	-0.104313	-0.121328	0.244731	0.263178	0.163387	-0.0855148	0.10822	0.358328	0.29981	0.21377	0.688456
E7FBE5	E7FBE5	cltcl1	12	10	15.3	311	DANRE	188478	Clathrin heavy chain	SUBCELLULAR LOCATION: Cytoplasmic vesicle membrane {ECO:0000256|PIRNR:PIRNR002290}; Peripheral membrane protein {ECO:0000256|PIRNR:PIRNR002290}; Cytoplasmic side {ECO:0000256|PIRNR:PIRNR002290}. Membrane, coated pit {ECO:0000256|ARBA:ARBA00004277, ECO:0000256|PIRNR:PIRNR002290}; Peripheral membrane protein {ECO:0000256|ARBA:ARBA00004277, ECO:0000256|PIRNR:PIRNR002290}; Cytoplasmic side {ECO:00002…	0.807151	0.000162452	0.00338906	0.300473	0.0934268	0.283262	-0.202371	0.244215	0.64854	0.304308	0.0692864	0.17357	0.0574603	0.391593	0.0391812	-0.42572	0.0863582	-0.535345	0.585278	0.440645	0.180612	-0.347087	0.036213	0.521293	-0.390986	0.39975	-0.31153
Q6DHB6	Q6DHB6|O77727|F6PA25|A5WUY5	krt91	724	33	95.4	1157.79	DANRE	49993.5	Keratin 91	NA	0.424975	0.0974592	0.198997	-0.478513	0.0854286	0.269994	0.308039	0.251932	0.654816	1.21153	0.000214675	0.00354188	1.08178	-0.018686	0.903349	-0.72404	0.330767	0.39296	0.872535	-0.0202102	0.696923	-0.700293	-0.332583	-0.200426	-0.216261	0.168128	-0.130501
B0UYS0	B0UYS0	krt15	117	35	79.3	871.26	DANRE	48877.8	Keratin 15	NA	-0.156489	0.66064	0.759981	-0.937664	0.0271779	0.134156	-0.273094	0.480826	0.824152	0.50808	0.168613	0.315112	0.89123	0.108061	0.977145	-0.0594607	-0.295506	0.190745	0.401747	0.390486	0.668168	-0.0801389	-0.873767	-1.0222	0.301793	0.592662	0.532773
Q6DHU3	Q6DHU3|F1QP28	krt97	121	43	83.1	744.25	DANRE	49784.5	Keratin 97	NA	0.0782261	0.778946	0.847548	-1.27333	0.000860111	0.0156032	0.0620356	0.836606	0.958929	1.41359	0.000185855	0.00319913	1.24676	-0.0714061	1.20307	-0.410765	0.346827	0.946646	0.398205	-0.270618	1.10802	-0.2449	-1.18665	-0.458739	-0.207781	-0.0362001	-0.286423
Q1LXJ1	Q1LXJ1|I3ITC7|I3IT59|I3ISA0	krt17	58	20	82.7	684.99	DANRE	46344.9	Keratin 17	NA	0.436695	0.19454	0.318239	-0.178875	0.61251	0.808475	-0.0338695	0.923216	0.982895	0.581701	0.0916373	0.210686	0.781342	0.436502	0.490926	-0.937926	-0.422058	-0.0861246	0.884215	0.201626	0.16655	-0.373736	0.0157391	-0.298626	0.144092	0.433171	0.19346
F1R8U0	F1R8U0|E7F6W3|F1QHM2|F1QQ61	krt94	77	30	74.9	665.05	DANRE	47784.6	Keratin 94	NA	0.275685	0.56206	0.679227	-1.36458	0.0174536	0.104507	-0.176179	0.730437	0.9276	1.46408	0.00763393	0.0386665	0.386433	0.163622	0.768272	-0.612714	-0.501603	1.62525	1.09287	-0.515693	1.04957	-0.483477	-1.81285	-0.498167	-0.484826	-0.0738279	-0.445789
F1Q7G3	F1Q7G3|A0A0N4SUF2|Q1LXJ8	krt92	28	18	69.3	551.3	DANRE	47295.1	Keratin 92	NA	-0.0527023	0.924918	0.952864	-0.979842	0.122336	0.334367	-0.815395	0.192187	0.585141	0.111745	0.841719	0.899338	-0.153827	0.386125	0.826749	0.112459	-0.218089	-0.028924	-0.388635	-0.698612	-0.817737	0.93044	-2.46311	-0.537663	-0.520678	0.0186211	-1.14294
Q1LXK0	Q1LXK0	krt1-19d	71	32	74.9	538.03	DANRE	47168.7	Keratin, type 1, gene 19d	NA	0.018424	0.957402	0.971913	-1.92957	0.000156247	0.00570337	-0.426149	0.264713	0.665048	1.52185	0.0006206	0.00715495	1.68858	-0.0706956	1.63115	-0.809896	-0.648895	0.723755	0.316972	-0.0413272	1.40048	-0.278126	-1.37383	-0.372691	0.154357	-0.085023	0.290232
Q1LXJ9	Q1LXJ9|I3IRY2	krtt1c19e	19	15	45.8	404.69	DANRE	49933.5	Keratin type 1 c19e	NA	0.768561	0.207932	0.333681	-0.249099	0.697214	0.858787	-0.725465	0.267612	0.66667	0.292195	0.622675	0.744251	0.994241	0.572396	0.574153	-0.742623	-0.636397	-1.66255	0.713546	0.86767	0.0919167	-0.552538	-0.826127	-0.815671	-0.0064939	1.27883	0.130634
F1QP23	F1QP23|X1WGZ7	eprs1	121	75	53.1	1154.3	DANRE	188003	Glutamyl-tRNA synthetase	NA	0.43345	0.00175523	0.0140249	0.319077	0.0190275	0.108893	-0.290324	0.029992	0.23168	-0.175951	0.134512	0.271119	-0.192871	0.441959	-0.142502	-0.175867	-0.0840279	-0.195782	0.400543	0.445355	-0.299234	-0.144019	0.0179221	0.351702	0.100433	0.368196	0.0928662
F1R8N2	F1R8N2|E7F8T4	F1R8N2	161	13	48.6	1138.82	DANRE	161933	Sb:cb37 (Fragment)	NA	0.0329845	0.902002	0.936252	0.0119852	0.96695	0.985591	0.35396	0.23444	0.634309	0.374959	0.177298	0.324178	0.144166	0.326618	0.499354	-0.590755	0.175184	0.590642	0.784574	-0.446604	0.0158294	-0.414253	0.0136915	0.0871131	0.432254	-0.0850333	0.32291
F6NTZ9	F6NTZ9|A0A0R4IDD1	a2ml	13	8	46.2	1075.22	DANRE	162129	Alpha-2-macroglobulin-like (Fragment)	SUBCELLULAR LOCATION: Secreted {ECO:0000256|ARBA:ARBA00004613}.	0.104553	0.59527	0.708028	-0.206544	0.337526	0.590741	0.0745601	0.72495	0.926826	0.385657	0.066045	0.168257	0.234014	0.236984	0.635213	-0.450411	0.238859	0.626821	0.275537	-0.141657	-0.139629	-0.0632194	-0.116715	0.133967	0.243093	0.00270584	0.0843263
X1WC44	X1WC44	si:ch211-212c13.8	37	16	50.6	911.92	DANRE	126438	Si:ch211-212c13.8 (Fragment)	NA	0.0417563	0.904331	0.938149	-0.0140345	0.970158	0.987224	0.331548	0.384117	0.762225	0.387339	0.276283	0.433427	0.319236	0.406734	0.587571	-0.809633	-0.0329705	0.406582	0.973395	-0.339815	0.159637	-0.596728	0.122241	0.105265	0.707943	-0.0814898	0.622088
X1WBT0	X1WBT0	si:dkey-105h12.2	16	10	36.1	826.99	DANRE	161760	Si:dkey-105h12.2	NA	0.0285774	0.864828	0.909123	-0.14345	0.434301	0.674481	0.0418655	0.81749	0.955526	0.213893	0.21652	0.371772	0.0114825	0.0450593	0.256904	-0.0686233	0.116169	0.866274	0.250122	0.346558	0.0818602	0.137942	0.115748	-0.0614445	0.217402	0.145084	0.074227
Q6P3J5	Q6P3J5	eef2b	200	35	67	1105.17	DANRE	96523.7	Eukaryotic translation elongation factor 2	NA	0.11934	0.525278	0.647611	0.230116	0.264944	0.516767	-0.168179	0.409849	0.779443	-0.278955	0.151205	0.292403	-0.0385911	0.308745	-0.0525341	-0.236248	-0.139501	-0.316963	0.234733	0.257263	-0.12791	-0.259202	0.193119	0.310727	0.537451	0.180449	0.537821
A0A286Y8X9	A0A286Y8X9|A2CE51|Q1LYG5|A0A0R4IIY8	eef2b	89	33	66.9	1129.17	DANRE	96778.8	Eukaryotic translation elongation factor 2b	NA	0.953058	3.72477e-05	0.00151426	0.291116	0.105953	0.3072	-0.835696	0.000257465	0.0189865	-0.173754	0.282763	0.439355	-0.151995	0.70673	-0.0235086	-0.149071	-0.311119	-0.477567	0.22106	0.880253	-0.760466	-0.24137	-0.0967452	0.683154	-0.0753546	0.823576	-0.252723
Q6PCR7	Q6PCR7	eif3a	144	94	53	1126.32	DANRE	151803	Eukaryotic translation initiation factor 3 subunit A	SUBCELLULAR LOCATION: Cytoplasm {ECO:0000255|HAMAP-Rule:MF_03000}.	0.194268	0.109633	0.215661	0.304977	0.0268909	0.133633	-0.120802	0.340622	0.729705	-0.231511	0.0615494	0.160084	-0.081077	0.248385	-0.0980887	-0.126249	-0.0809878	-0.565252	0.186046	0.160057	-0.211412	-0.0835724	0.0930019	0.186119	0.0839736	0.152726	0.0960626
F1QYU0	F1QYU0	lama4	136	68	34.7	1100.74	DANRE	211131	Laminin, alpha 4	NA	0.535865	0.000148885	0.00327857	0.465631	0.000940646	0.0164769	0.274738	0.0258247	0.216069	0.344972	0.00467163	0.0277108	0.157884	0.173491	0.136128	-0.263752	0.381762	-0.0427923	0.624038	0.269071	-0.0927903	-0.355551	0.509916	0.384219	-0.441224	0.0952202	-0.160929
F1QV31	F1QV31|F1R5A5|E9QBD7|E9QFT4	krt5	563	31	59.7	1098.89	DANRE	59176.6	Keratin 5	NA	0.450867	0.108511	0.214252	-0.679463	0.0319177	0.148926	0.219068	0.451789	0.807339	1.3494	0.000191336	0.00326062	1.05964	-0.0192229	0.946839	-0.644375	0.453034	0.531203	0.702591	-0.0265354	0.685311	-0.616234	-0.776769	-0.459762	-0.468169	0.134391	-0.445819
F1QK60	F1QK60|F1RDG4	krt4	6	2	66.8	1023.14	DANRE	53996.2	Keratin 4	NA	0.490954	0.486605	0.61324	-1.03741	0.184835	0.422205	0.364787	0.630488	0.891068	1.89315	0.0163381	0.0659451	0.776097	0.42865	1.73774	-3.1606	-0.429803	1.52505	0.403709	-0.498406	0.373127	0.509018	0.222874	0.350797	-0.437926	-1.47781	-0.0710792
A9JRS6	A9JRS6|A0A2R8Q0V6	krt4	4	2	66.8	1014.29	DANRE	54012.2	Keratin 4	NA	0.500554	0.791442	0.856102	-0.464043	0.820386	0.919901	-1.54767	0.453574	0.808024	-0.583072	0.758176	0.839281	1.43246	-0.388893	-3.67008	0.699556	0.0546229	-4.57154	1.21017	-0.0153087	1.5308	-4.27856	-6.61569	-1.59391	0.232183	1.05426	0.400757
Q6NWF6	Q6NWF6|A0A2R8Q6V3	krt8	197	39	70	919.79	DANRE	57815.6	Keratin, type II cytoskeletal 8	SUBCELLULAR LOCATION: Cytoplasm {ECO:0000250}. Nucleus, nucleoplasm {ECO:0000250}. Nucleus matrix {ECO:0000250}.	0.281319	0.183047	0.305978	-0.0408592	0.852839	0.934806	-0.0675002	0.759544	0.940066	0.254678	0.225185	0.379861	0.263763	0.462949	0.266567	-0.317612	0.0781237	-0.128634	0.681304	0.00921753	0.235485	-0.134468	-0.40412	0.0482725	-0.0461869	0.223306	0.116736
F1R8W4	F1R8W4|F1R8W3	desma	278	42	82.2	983.71	DANRE	54205.3	Desmin a	NA	2.47574	2.38765e-07	7.96971e-05	1.87139	1.1646e-05	0.00129315	-0.137693	0.62	0.888585	0.46666	0.0859878	0.202418	-0.733246	0.844525	-1.09737	-1.71183	0.520144	-1.35662	1.01625	0.741273	-1.60805	-2.25886	0.481314	1.2351	-1.45395	0.420151	-1.2373
F1QCR7	F1QCR7	nefma	115	50	56.3	889	DANRE	95632.1	160 kDa neurofilament protein	SUBCELLULAR LOCATION: Cell projection, axon {ECO:0000256|ARBA:ARBA00004489}. Cytoplasm, cytoskeleton {ECO:0000256|ARBA:ARBA00004245}.	0.73463	0.000373039	0.00546377	0.794134	0.000370479	0.0093696	0.608037	0.00292307	0.0641457	0.548533	0.00349193	0.0230649	0.0535864	-0.248104	-0.22094	-0.514703	0.620048	-0.0986402	0.605541	0.179085	-0.363759	-0.661788	0.684497	0.416994	-0.941162	-0.233338	-0.706232
A9JRG7	A9JRG7|A0A0R4IIU9	A9JRG7	153	50	67.5	872.5	DANRE	85638.3	Zgc:172323	NA	0.755348	0.00128221	0.011405	-0.00570628	0.977544	0.989718	-0.134821	0.509735	0.839277	0.626232	0.00481427	0.0282138	0.315569	0.142282	0.490919	-0.331949	0.352613	0.0535605	0.426107	0.294614	0.100124	-0.462465	-0.0757089	0.922505	-0.560099	0.117233	-0.190244
F1RAE8	F1RAE8|Q58EE9	gfap	104	44	81.3	791.77	DANRE	51319.6	Glial fibrillary acidic protein	NA	0.755592	5.51987e-05	0.00191295	0.434498	0.00788838	0.0617533	-0.0138589	0.921674	0.982895	0.307235	0.0322712	0.103892	-0.158961	0.420517	0.0074798	-0.321422	0.389833	-0.190524	0.365942	0.376616	0.120811	-0.474433	0.381823	0.676885	-0.522261	0.0982162	-0.13202
B0S553	B0S553	nefmb	91	44	54.5	672.94	DANRE	81837.7	160 kDa neurofilament protein	SUBCELLULAR LOCATION: Cell projection, axon {ECO:0000256|ARBA:ARBA00004489}. Cytoplasm, cytoskeleton {ECO:0000256|ARBA:ARBA00004245}.	0.854273	0.0001532	0.0033073	0.756513	0.00083022	0.0154018	0.0847087	0.635241	0.893083	0.18247	0.278975	0.435387	0.079953	0.151559	-0.32213	-0.388451	0.366604	-0.555829	0.44871	0.49086	-0.445288	-0.616954	0.521753	0.707	-0.646073	0.0945028	-0.321694
Q7SZP4	Q7SZP4	Q7SZP4	73	37	60.1	617.13	DANRE	64863.8	Zgc:65851	NA	0.883813	0.000115834	0.00278266	0.717619	0.00128528	0.0202735	-0.0825116	0.645064	0.89642	0.0836825	0.614142	0.736715	0.00640183	0.323882	-0.280892	-0.491901	0.192178	-0.730806	0.45101	0.648131	-0.352146	-0.531311	0.491587	0.679247	-0.48084	0.191821	-0.188119
E9QFD5	E9QFD5|A0A286Y951|E7F9E8	nefla	52	28	49.5	546.97	DANRE	69424.6	Neurofilament, light polypeptide a (Fragment)	NA	0.809067	0.000141819	0.0032122	0.493067	0.0101543	0.0739003	0.125056	0.458766	0.812935	0.441057	0.0123343	0.0538308	0.118554	0.174371	-0.179423	-0.524972	0.420519	-0.371483	0.344017	0.351308	0.0128766	-0.70902	0.400057	0.641341	-0.554613	-0.114454	-0.395097
Q502Q7	Q502Q7|F1QT82	prph	52	31	65.1	467.32	DANRE	51597.9	Peripherin	NA	0.422804	0.00117131	0.0108444	0.281135	0.02413	0.125829	0.139519	0.227135	0.6244	0.281187	0.0163604	0.0659932	0.17537	0.15343	0.153508	-0.170558	0.282302	-0.0835095	0.342501	0.20717	0.0177158	-0.25098	0.415915	0.469091	-0.2404	-0.000140582	-0.199727
F1QK59	F1QK59|A0A2R8PYZ9	desmb	24	16	50.9	462.44	DANRE	54257.8	Desmin b	NA	-1.3812	0.0230035	0.0735684	-0.795486	0.192212	0.430525	0.211357	0.720506	0.926491	-0.374354	0.496593	0.64237	-0.19448	0.142766	0.773968	0.677665	0.0813053	0.0546852	-0.201458	-1.27864	-0.210642	1.24762	-1.94866	-2.12945	0.116218	-0.338519	-0.120554
F1QAM8	F1QAM8	vim	33	19	52.9	392.63	DANRE	52593.8	Vimentin	NA	0.437834	0.062525	0.14681	-0.0457104	0.846777	0.931916	0.0188566	0.936426	0.985128	0.502401	0.0360994	0.112374	0.444989	0.394057	0.536646	-0.618344	-0.0838935	-0.182472	0.604583	0.033142	0.423831	-0.342228	0.259426	0.487762	0.0891486	0.049766	0.0848136
B3DI58	B3DI58	ngs	55	26	45	375.94	DANRE	60432.4	Notochord granular surface	NA	0.0716389	0.86517	0.909181	-0.0354793	0.937916	0.975611	0.0661439	0.88458	0.973909	0.173262	0.682165	0.787619	0.604837	0.351178	0.792011	0.123603	0.235499	-0.103232	0.653862	-1.08676	-0.478603	0.114624	-0.384539	1.16007	0.070202	-0.0159713	-0.186463
B0R1B8	B0R1B8|A0A0R4IZ96	neflb	47	20	39.7	448.4	DANRE	65449.3	Neurofilament light polypeptide	SUBCELLULAR LOCATION: Cytoplasm, cytoskeleton {ECO:0000256|ARBA:ARBA00004245}.	0.775145	8.24141e-05	0.00229991	0.936316	2.8007e-05	0.0020181	0.320889	0.0494556	0.299035	0.159718	0.264687	0.421915	-0.0115113	0.153056	-0.346687	-0.346973	0.481708	-0.465691	0.697991	0.365707	-0.465153	-0.594959	0.662469	0.572284	-0.639096	0.0816213	-0.346885
A8KBU6	A8KBU6|A0A2R8QF11	A8KBU6	13	9	28.1	231.67	DANRE	55313.2	Zgc:158846	NA	-0.856123	0.0325043	0.0934886	-0.88319	0.0396858	0.171189	0.0189794	0.961515	0.990585	0.0460464	0.899407	0.938704	0.433973	-0.112994	0.633512	0.492891	0.10515	0.627491	-0.0297228	-0.658576	-0.100805	0.823932	-1.52937	-1.13166	-0.0364778	-0.111272	0.129642
F1QT60	F1QT60	viml	11	9	35.1	198.17	DANRE	51654.9	Vimentin-like	NA	-0.350539	0.0485981	0.123333	0.186077	0.303927	0.559364	-0.107129	0.548291	0.857576	-0.643745	0.00154962	0.0133871	-0.440389	-0.208781	-0.237445	0.244451	-0.186154	-0.326345	-0.416843	-0.286688	-0.874121	0.521098	-0.247497	0.0650964	0.028501	-0.275102	-0.0973695
B8A615	B8A615	si:dkey-33c12.3	16	12	33.2	154.85	DANRE	45120.9	Si:dkey-33c12.3	NA	-0.131364	0.527976	0.650053	0.420502	0.0770609	0.257181	0.537431	0.0290703	0.229024	-0.0144343	0.944274	0.966528	-0.439025	-0.584902	-0.181749	0.0394422	0.479231	0.348193	-0.036917	-0.0618821	-0.523829	0.0583741	0.221884	-0.309324	-0.367949	-0.308021	-0.468541
F1Q8F1	F1Q8F1	inab	9	8	21.9	150.27	DANRE	54194.2	Internexin neuronal intermediate filament protein, alpha b	NA	0.614498	0.00142785	0.0123036	0.565836	0.00440266	0.0431488	-0.12648	0.454693	0.808712	-0.0778172	0.617111	0.739157	-0.149646	0.0794148	-0.37314	-0.011372	0.07983	-0.456235	0.221039	0.55352	-0.452516	-0.191857	0.322986	0.588663	-0.592847	0.116127	-0.324192
B8A534	B8A534|F1Q5R6	si:dkey-27m7.4	12	9	28.9	128.18	DANRE	38880.8	Si:dkey-27m7.4 (Fragment)	NA	-0.00584466	0.971421	0.980543	-0.402682	0.0368186	0.162242	0.198151	0.272491	0.672165	0.594989	0.00263836	0.0188824	0.556275	-0.346637	0.372867	0.245241	0.146825	0.662534	-0.0526679	-0.0816553	0.111484	-0.113208	-0.0248345	-0.160486	-0.2704	-0.111396	-0.538428
A0A0R4IHV1	A0A0R4IHV1	pkmb	396	46	87.7	1089.98	DANRE	58909.8	Pyruvate kinase	NA	1.65088	2.03414e-05	0.0010116	1.04584	0.00212331	0.0281084	0.349657	0.222609	0.620292	0.954694	0.00234939	0.0176511	0.0045206	0.441025	0.122792	-1.2759	0.414313	-0.723133	1.10822	0.578728	-0.255345	-1.71316	0.976607	0.489501	-1.2329	0.424309	-0.447977
Q7ZVT2	Q7ZVT2|A0A0R4IAN1|A0A0R4IAV3	pkma	10	6	75.9	621.66	DANRE	58627.3	Pyruvate kinase	NA	0.108028	0.858089	0.904287	-0.101196	0.876743	0.945166	-0.399307	0.543357	0.855156	-0.190083	0.753368	0.836329	-0.0456858	0.791974	0.0215719	-1.13152	-0.607106	-0.921829	0.0189458	-0.0302933	0.661571	-1.19002	0.0712924	0.321773	1.06614	-0.175381	1.73136
A0A0R4IGP6	A0A0R4IGP6	pkma	3	3	73.8	592.29	DANRE	58626.4	Pyruvate kinase	NA	0.101691	0.747404	0.824354	0.199722	0.56001	0.77297	0.48057	0.173903	0.555175	0.38254	0.23794	0.392809	-0.0780503	0.531909	0.175368	-0.0665554	0.756052	0.815062	0.57359	-0.590737	0.338421	-0.691542	0.207625	0.507716	-0.0803533	-0.321481	0.559093
A2CEW3	A2CEW3|A0A0R4IDI3|A0A0R4IXY1	fn1b	117	64	33.8	1060.34	DANRE	279482	Fibronectin	NA	0.00633156	0.966413	0.977511	-0.122744	0.454895	0.6904	0.0117738	0.942214	0.986981	0.140849	0.357168	0.515079	0.163043	0.267897	0.16994	0.143717	0.00562649	0.430111	0.384299	-0.342482	0.107035	0.0228457	-0.105561	0.289656	0.102899	0.116987	0.0372697
B0S602	B0S602	fn1a	3	3	14.9	406.28	DANRE	275721	Fibronectin	NA	-0.125152	0.595271	0.708028	-0.440952	0.0993093	0.294262	-0.260988	0.312347	0.706457	0.0548118	0.8152	0.879821	-0.360271	0.275168	0.034482	0.321358	0.0672831	0.890235	-0.444153	-0.0939412	0.234661	0.254936	-0.346655	-0.250943	0.141957	0.148967	-0.13839
F1RBP8	F1RBP8	F1RBP8	2	2	13.4	378.99	DANRE	275886	Fibronectin	NA	-0.403298	0.00305794	0.0194355	-0.253012	0.0546465	0.209528	0.126764	0.308928	0.703997	-0.023522	0.835169	0.894411	0.228015	0.208291	0.29708	0.218865	0.0111912	0.39393	0.283421	-0.121044	0.486682	0.354356	0.000630449	-0.0863671	0.550429	-0.114277	0.376145
A0A0R4IQN8	A0A0R4IQN8|A0A2R8QLG5|E9QCS9|F1RE85|Q8JIU7	naca	122	67	60.2	1047.7	DANRE	104796	Nascent polypeptide-associated complex subunit alpha	NA	1.86779	5.88625e-05	0.00193737	0.73449	0.0526224	0.20421	-0.70708	0.0607719	0.332309	0.426219	0.203992	0.35772	0.0538716	0.736222	-0.0986578	-0.759896	-0.301764	-1.55756	0.860633	1.03824	-0.55358	-1.17402	0.0276539	1.05759	-1.08737	0.7783	-0.839518
F1RAG3	F1RAG3|F1R998	nid1a	138	59	53	1047.66	DANRE	132836	Nidogen 1a	SUBCELLULAR LOCATION: Membrane {ECO:0000256|ARBA:ARBA00004370}. Secreted, extracellular space, extracellular matrix, basement membrane {ECO:0000256|ARBA:ARBA00004302}.	0.566144	0.0030615	0.0194355	0.458243	0.0174438	0.104507	0.0371655	0.828384	0.956677	0.145067	0.368173	0.525557	0.253232	0.312693	0.0601843	-0.222384	0.183597	-0.469604	0.59836	0.365119	-0.0370983	-0.40229	0.447806	0.460576	-0.265159	0.352633	0.116277
F1R3X9	F1R3X9	spegb	93	71	28.1	1008.96	DANRE	344960	Striated muscle-enriched protein kinase b	NA	0.445024	0.00586261	0.0296668	0.064422	0.665743	0.841323	-0.212384	0.169001	0.550208	0.168218	0.23469	0.389166	0.376874	0.182908	0.11047	0.0427889	-0.0398257	-0.0784905	0.249235	0.546743	-0.200004	-0.226949	0.140494	0.204884	-0.225517	0.38154	-0.0543451
A0A0R4IS57	A0A0R4IS57|Q1LYE8|Q696W0	spega	5	5	2.3	76.78	DANRE	337203	Striated muscle-enriched protein kinase a	NA	-0.541104	0.392711	0.525881	0.389357	0.565934	0.778098	0.724671	0.292951	0.68811	-0.20579	0.742015	0.828101	-0.547077	-0.741927	-0.570127	-0.899643	-0.468667	-0.95849	1.1054	-0.956251	1.30075	-0.695845	-0.0498644	0.688883	0.381846	-1.1069	1.26186
F1QPC0	F1QPC0|F1QQQ3	vtg3	158	59	48.9	1008.6	DANRE	141730	Phosvitin (Fragment)	NA	-0.331862	0.802165	0.864898	-2.37642	0.114064	0.321424	-1.89688	0.19925	0.594693	0.147683	0.911133	0.945078	-0.670393	2.10324	-0.0927736	-2.87161	-2.49378	-1.92627	-1.86643	-2.47402	1.90859	-2.18709	-3.35469	0.131809	1.63666	-2.46005	2.05046
F8W4M7	F8W4M7	aco2	241	2	66.9	1005.49	DANRE	86329.7	Aconitate hydratase, mitochondrial (Fragment)	SUBCELLULAR LOCATION: Mitochondrion {ECO:0000256|ARBA:ARBA00004173, ECO:0000256|RuleBase:RU362107}.	0.9196	6.77807e-05	0.00205669	0.626634	0.003028	0.035126	0.347538	0.0645547	0.343256	0.640505	0.00148352	0.0130111	0.323814	0.123347	0.155844	-0.58021	0.541655	-0.202373	0.446821	0.392792	-0.19788	-0.907169	0.950981	0.396679	-0.639112	0.28297	-0.356123
A0A2R8RID5	A0A2R8RID5	aco2	4	2	67.6	992.65	DANRE	85544.8	Aconitate hydratase, mitochondrial	SUBCELLULAR LOCATION: Mitochondrion {ECO:0000256|ARBA:ARBA00004173, ECO:0000256|RuleBase:RU362107}.	4.02778	0.0161735	0.0580869	-0.692531	0.666854	0.841497	-0.945199	0.558109	0.861965	3.77512	0.0224724	0.0812219	0.538538	0.349092	0.359665	0.0154303	1.07364	0.600866	-3.2008	0.89168	0.0894054	-6.69631	1.24092	0.718045	-6.46711	0.640329	-0.363993
F1Q545	F1Q545|F1R530	mybpc1	127	3	56.5	993.39	DANRE	132478	Myosin-binding protein C1	NA	0.948494	0.000739464	0.00809241	1.02556	0.000733277	0.0143657	0.22713	0.347088	0.731724	0.150062	0.498517	0.643823	-0.123558	0.494956	-0.266477	-0.721861	0.28201	-0.86465	0.965655	0.0616546	-0.492551	-0.685973	0.518595	0.843532	-0.621052	0.0463494	-0.318598
A5WWB7	A5WWB7	A5WWB7	6	2	56.1	966.38	DANRE	130160	Myosin-binding protein C1	NA	0.673605	0.0017394	0.013946	1.06122	7.14757e-05	0.00365506	-0.459318	0.0274625	0.222052	-0.846937	0.000275432	0.00421474	-0.712416	0.934103	-0.755355	-0.284712	-0.125136	-1.21741	0.444438	0.414683	-0.833642	-0.140457	0.225257	0.757717	0.0935836	0.456846	0.200515
Q7ZU99	Q7ZU99|A0A2R8QNF0|F1QSI7	vcp	125	36	76.7	984.87	DANRE	90049.8	Transitional endoplasmic reticulum ATPase	SUBCELLULAR LOCATION: Cytoplasm, cytosol {ECO:0000250|UniProtKB:P23787}. Endoplasmic reticulum {ECO:0000250|UniProtKB:P55072}. Nucleus {ECO:0000250|UniProtKB:P23787}.	0.332619	0.0404019	0.107795	-0.139935	0.390886	0.636846	0.0828059	0.608212	0.882902	0.55536	0.00223538	0.0170984	0.362496	0.203914	0.395636	-0.267112	0.118695	0.305851	0.337177	0.206232	0.558732	-0.559701	0.341361	0.220278	-0.0496605	0.101329	0.277749
Q29RA2	Q29RA2	Q29RA2	58	29	67.3	839.01	DANRE	90234.3	Transitional endoplasmic reticulum ATPase	NA	0.301329	0.0256929	0.0794463	-0.134286	0.317139	0.571625	0.125707	0.347868	0.732463	0.561322	0.000432259	0.00557105	0.692445	0.173186	0.497014	-0.04214	0.116908	0.21384	0.390642	0.289439	0.348526	-0.299142	0.403459	0.0626233	-0.18793	0.186603	0.035747
Q7T306	Q7T306	ckmb	1065	31	90	983.97	DANRE	43136.2	Creatine kinase	NA	0.627191	0.00935864	0.0401845	-0.350524	0.138364	0.358695	0.278557	0.231544	0.629967	1.25627	3.91841e-05	0.00119455	1.02485	0.101122	0.983386	-0.605905	0.0530426	0.400143	0.617997	0.340037	0.674294	-0.932281	0.589395	-0.0160956	-0.410081	0.141289	0.0058564
A2BHA3	A2BHA3	ckma	653	30	87.9	940.38	DANRE	43042	Creatine kinase	NA	0.666682	0.00316703	0.0199259	-0.488866	0.0289556	0.140372	0.236037	0.256625	0.659584	1.39158	4.51644e-06	0.000323233	1.03823	0.153361	1.02118	-0.536936	0.0277133	0.63358	0.576768	0.428066	0.824779	-0.873566	0.567246	-0.0640765	-0.57999	0.100805	-0.0580811
Q8AY63	Q8AY63|F6NIF4|R4GE87|R4GEP9|R4GDX0	ckbb	91	18	84.2	610.02	DANRE	43168.1	Creatine kinase	NA	-0.120509	0.705809	0.793519	0.0594884	0.862718	0.93822	0.0843629	0.806404	0.952461	-0.0956347	0.764261	0.8434	-0.484166	0.168738	0.0359869	-0.517465	-0.0678639	-0.121181	0.253961	0.0896797	0.70558	-0.386849	0.0945325	0.182278	0.635829	-0.403974	0.787243
Q08BV6	Q08BV6|B8JJ24	ckba	62	14	80.8	527.17	DANRE	43150.6	Creatine kinase	NA	0.310816	0.276728	0.410144	0.1195	0.692592	0.855087	0.152723	0.614085	0.885451	0.344039	0.231007	0.385801	-0.581189	0.193936	0.62672	-0.196288	-0.432766	-0.0906614	0.648204	0.268727	0.343197	-0.177803	0.366611	-0.274307	-0.62928	-0.0231825	-0.0747199
B8JJ23	B8JJ23	ckba	3	3	75.7	287.98	DANRE	29709.3	Creatine kinase (Fragment)	NA	-0.343189	0.684413	0.778295	0.263642	0.772159	0.899056	-0.196026	0.829414	0.956677	-0.802857	0.348666	0.506156	-2.47712	-1.85328	-1.33279	0.915578	-0.214077	0.094811	-1.46233	-0.972022	-1.62121	0.547794	-1.53489	-1.88765	-1.85667	1.21532	-1.73158
X1WI01	X1WI01|A0A2R8PXN9|A0A2R8QQS3	igfn1.3	107	59	53.1	972.89	DANRE	153561	Immunoglobulin-like and fibronectin type III domain-containing 1, tandem duplicate 3	NA	-0.0785658	0.757844	0.832205	-0.207982	0.45413	0.690064	0.104137	0.705444	0.921319	0.233553	0.366406	0.524229	0.761536	0.0808277	0.757445	0.357149	0.0908886	-0.396864	0.423283	-0.417238	0.454757	-0.0447328	0.0445392	0.160966	0.122019	0.503843	0.208226
Q58EB2	Q58EB2	igfn1.1	91	33	68.7	549.58	DANRE	61043.2	Immunoglobulin-like and fibronectin type III domain-containing 1, tandem duplicate 1	NA	-0.744689	0.000106139	0.00260591	-1.00192	1.24213e-05	0.00129315	0.26646	0.0913828	0.410509	0.523695	0.0019681	0.0157284	1.19408	-0.248663	0.967873	0.392873	-0.0934321	0.733722	0.0420031	-0.354048	0.845029	0.0662994	-0.148812	-0.510811	0.578861	-0.219308	0.607892
X1WD78	X1WD78	igfn1.2	13	12	12.5	163.18	DANRE	158118	Immunoglobulin-like and fibronectin type III domain-containing 1, tandem duplicate 2	NA	-0.315424	0.44848	0.578808	0.845752	0.0745872	0.252672	0.783024	0.0959343	0.418874	-0.378152	0.365889	0.523843	0.227913	-0.447652	-0.055509	0.180389	0.0289119	-1.08928	0.511128	-0.771347	-0.862468	0.132754	0.662708	0.893137	-0.238586	-1.20257	-0.341293
A0A286YBH9	A0A286YBH9|A5WUQ7	apobb.2	113	65	26.8	961.65	DANRE	279870	Apolipoprotein Bb, tandem duplicate 2	NA	0.183781	0.418683	0.551003	-0.116228	0.632922	0.822241	0.300777	0.22801	0.62518	0.600786	0.0173221	0.0684357	0.311151	0.13008	0.925323	-0.27386	0.0471759	0.61379	0.847517	-0.213904	-0.140569	-0.0736305	0.0388933	0.0931716	-0.135051	0.0323286	-0.210907
F1QZT8	F1QZT8|E9QC46|A0A0R4IPE6|E9QFK5|E9QGH3|E9QHU9|E9QGE0|E9QBC9|E9QCS2|F1R260|E9QDV9|E9QGB1	cast	135	2	75.2	937.22	DANRE	87389	Calpain inhibitor	NA	0.369878	0.0151421	0.0554774	-0.250432	0.102838	0.300504	-0.128204	0.385088	0.762631	0.492106	0.00259121	0.0187567	0.598031	0.200849	0.513285	-0.170141	0.0533519	0.0674265	0.284178	0.179109	0.0628018	-0.175977	-0.157668	0.149972	-0.251169	0.222702	-0.129591
A0A2R8RI86	A0A2R8RI86|E9QHK0|E9QF35|E9QDC1	A0A2R8RI86	3	2	79.3	929.58	DANRE	82937	Calpain inhibitor	NA	0.747192	0.117209	0.225528	-0.564123	0.261702	0.513128	-0.361112	0.465869	0.81682	0.950202	0.0525633	0.145357	0.983222	0.455168	0.893227	-1.17514	-0.878082	-0.559825	0.345479	0.612219	0.850396	-0.835076	0.465499	0.44486	-0.266334	-0.157269	0.642759
Q08BA1	Q08BA1	atp5fa1	430	54	77.1	929.65	DANRE	59913.9	ATP synthase subunit alpha	NA	1.07153	0.000182756	0.00357728	1.12326	0.00023827	0.00722904	0.409229	0.0898105	0.408593	0.357489	0.107352	0.231723	0.0998322	0.120321	-0.15148	-0.510488	0.604736	-0.723384	0.53936	0.475494	-0.610572	-0.984501	1.18649	0.527802	-0.8556	0.346922	-0.464973
F1RA51	F1RA51	itgb4	100	67	38.5	927.98	DANRE	214178	Integrin beta	SUBCELLULAR LOCATION: Membrane {ECO:0000256|ARBA:ARBA00004479, ECO:0000256|RuleBase:RU000633}; Single-pass type I membrane protein {ECO:0000256|ARBA:ARBA00004479, ECO:0000256|RuleBase:RU000633}.	0.300653	0.0271648	0.0825488	-0.138367	0.307687	0.562364	-0.125757	0.352144	0.736792	0.313263	0.022313	0.0810812	0.352453	0.214651	0.375357	-0.0776819	0.0918458	0.134479	0.237662	0.0792822	-0.121622	-0.128395	-0.189107	0.225349	-0.211226	0.170946	-0.0950811
F1QYX8	F1QYX8	hadhab	160	42	65.3	922.8	DANRE	83587.6	Enoyl-CoA hydratase	NA	0.855815	0.0013659	0.0119586	0.534881	0.0351696	0.156939	0.0277994	0.904486	0.979936	0.348733	0.121511	0.251632	0.386971	0.364032	0.133938	-0.369938	0.460053	-0.567668	0.222903	0.492104	-0.171879	-0.880656	0.757709	0.56351	-0.313143	0.390044	-0.0498322
A7YT47	A7YT47	hadhaa	122	38	64.2	801.38	DANRE	82615.6	Enoyl-CoA hydratase	NA	0.539124	0.0211673	0.0697366	0.452476	0.0624924	0.22592	0.175089	0.444174	0.803137	0.261737	0.225018	0.379837	0.313676	0.000692117	0.0961816	-0.0462491	0.640749	-0.265787	-0.150184	0.403978	-0.423892	-0.390284	0.656998	0.148635	-0.548878	0.276422	-0.341359
F1RCA1	F1RCA1|E9QEY2|E9QFW7	uba1	121	52	61	917.86	DANRE	119560	Ubiquitin-like modifier-activating enzyme 1	NA	0.0724882	0.637165	0.742465	-0.0315108	0.848886	0.933377	-0.0597411	0.718427	0.925808	0.0442579	0.772744	0.849951	0.111268	0.260713	0.137638	-0.15479	0.0360965	0.130714	0.184295	0.117363	0.157464	-0.313585	0.087889	0.178755	0.312342	0.0931745	0.516085
E7EYF3	E7EYF3	uba7	26	20	23.9	308.56	DANRE	114917	Ubiquitin-activating enzyme E1	NA	-0.194888	0.166778	0.287978	0.556422	0.00196636	0.02702	0.790246	0.000107244	0.0132006	0.0389361	0.774304	0.851052	-0.0898247	-0.295319	-0.0353935	0.126382	0.481152	0.0122351	0.258964	-0.514516	-0.227235	0.00406704	0.673985	-0.366818	-0.326492	-0.0988604	-0.29992
F1Q4X8	F1Q4X8	evpla	104	73	37.3	910.27	DANRE	230093	Envoplakin a	SUBCELLULAR LOCATION: Cytoplasm, cytoskeleton {ECO:0000256|ARBA:ARBA00004245}.	-0.317234	0.00761226	0.035383	-0.948117	9.2385e-07	0.000308323	0.00293372	0.978815	0.993871	0.633817	2.85512e-05	0.00100024	0.930269	-0.236677	0.875035	0.15988	0.0785187	0.671984	-0.254019	-0.0249208	0.692569	0.157164	-0.291457	-0.235399	0.174586	-0.137349	0.142961
F1R833	F1R833|E7EZA1	nrap	100	69	36.2	899.55	DANRE	212552	Nebulin-related-anchoring protein	NA	-0.386513	0.00824201	0.0369928	-0.0328162	0.810089	0.91669	0.400523	0.0105025	0.131116	0.0468267	0.711536	0.808285	0.494833	-0.212477	0.412202	0.36909	0.013829	0.0472013	0.52177	-0.19869	0.187279	0.148691	0.222089	-0.129907	0.215244	-0.0507703	0.221183
A0A2R9YJG7	A0A2R9YJG7	vclb	108	40	59	873.06	DANRE	108312	Metavinculin	SUBCELLULAR LOCATION: Cell junction, adherens junction {ECO:0000256|ARBA:ARBA00004536}. Cell membrane, sarcolemma {ECO:0000256|ARBA:ARBA00004278}; Peripheral membrane protein {ECO:0000256|ARBA:ARBA00004278}; Cytoplasmic side {ECO:0000256|ARBA:ARBA00004278}. Cell membrane {ECO:0000256|ARBA:ARBA00004413}; Peripheral membrane protein {ECO:0000256|ARBA:ARBA00004413}; Cytoplasmic side {ECO:0000256|ARB…	-0.246079	0.35678	0.491891	0.19876	0.487512	0.716121	0.170713	0.549966	0.857576	-0.274126	0.30657	0.463553	-0.151788	-0.390667	-0.182962	0.372664	-0.193813	-0.465314	0.0592998	-0.376036	-0.41669	0.696455	-0.181772	-0.0312129	-0.401859	-0.30665	-0.787511
B8JIH2	B8JIH2|F6NHA0	vcla	44	28	39.5	691.76	DANRE	124613	Metavinculin	SUBCELLULAR LOCATION: Cell junction, adherens junction {ECO:0000256|ARBA:ARBA00004536}. Cell membrane, sarcolemma {ECO:0000256|ARBA:ARBA00004278}; Peripheral membrane protein {ECO:0000256|ARBA:ARBA00004278}; Cytoplasmic side {ECO:0000256|ARBA:ARBA00004278}. Cell membrane {ECO:0000256|ARBA:ARBA00004413}; Peripheral membrane protein {ECO:0000256|ARBA:ARBA00004413}; Cytoplasmic side {ECO:0000256|ARB…	0.441244	0.0102268	0.0424742	-0.0107766	0.94682	0.978453	-0.232093	0.167059	0.546975	0.219928	0.158026	0.301547	0.318614	0.0440606	0.0777518	0.0349126	-0.138716	0.00910411	0.283806	0.476962	-0.159857	0.00578903	0.00678968	0.239534	-0.422582	0.370324	-0.252217
A6H8Q3	A6H8Q3|A8KBU7|A0A0R4IJS3|A0A0R4IYH8|A1L142	mybphb	309	46	65.9	868.97	DANRE	57603.3	Myosin-binding protein Hb	NA	-0.652356	0.0106172	0.0435821	-1.31485	9.48404e-05	0.00432098	0.126416	0.601027	0.879434	0.788909	0.00321784	0.0217762	1.62361	-0.203173	1.32516	0.253454	-0.384046	0.481729	-0.0475677	-0.319882	0.975161	0.00620708	-0.20869	-0.58275	0.274101	-0.253595	0.71626
Q6NW94	Q6NW94|Q6GMJ2	mybpha	107	38	66.8	746.15	DANRE	56232	Myosin-binding protein Ha	NA	1.04864	0.00590551	0.0297717	0.565416	0.124273	0.337623	0.0856251	0.807219	0.952461	0.568851	0.0975106	0.21833	-0.21801	-0.213401	-0.720894	-0.699797	0.548603	0.613363	0.0277247	0.978646	-0.320707	-0.936089	0.635234	0.63485	-1.00749	-0.127179	-0.278278
F1R4U6	F1R4U6	si:ch211-14a17.10	138	8	42.4	867.09	DANRE	150779	Si:ch211-14a17.10	NA	-2.32939	7.83403e-08	5.52038e-05	-0.868282	0.00248273	0.031564	0.019013	0.935805	0.985128	-1.4421	1.51774e-05	0.000687429	-0.134376	-1.01944	-0.373626	1.51637	-0.775006	0.207498	-0.953273	-0.991903	-0.234048	1.4928	-1.27748	-1.58986	1.12077	-0.48253	1.10391
A0A2R8QNU4	A0A2R8QNU4	si:ch211-14a17.10	15	9	45.7	836.29	DANRE	138177	B30.2/SPRY domain-containing protein	NA	-1.64075	0.000335605	0.00513526	-0.599468	0.12576	0.339389	-0.751708	0.0609914	0.332309	-1.79299	0.000153567	0.00288096	-1.26626	-0.0447463	-0.860071	1.1782	-1.08462	0.116859	-1.0071	-0.591653	-0.489657	1.68963	-1.58104	-1.27924	1.13546	0.0254654	0.669537
Q6TH14	Q6TH14|E9QJI6	eno3	652	37	86.3	866.27	DANRE	47870.6	2-phospho-D-glycerate hydro-lyase	NA	0.70398	0.00109596	0.0103586	0.203076	0.283833	0.538214	0.284875	0.14096	0.503644	0.785779	0.000451781	0.00578736	0.469869	0.124633	0.532534	-0.570959	0.0743962	0.00576477	0.70061	0.322209	0.181838	-0.699686	0.726725	0.122377	-0.490236	0.293589	-0.192231
A0A2R8Q1X2	A0A2R8Q1X2|E9QCX7	eno1a	7	2	75	690.58	DANRE	47644.5	2-phospho-D-glycerate hydro-lyase	NA	0.429257	0.495012	0.620919	-0.670144	0.32881	0.581586	-0.43046	0.525868	0.847752	0.668941	0.293867	0.449882	1.37607	0.246353	1.14869	-0.80979	-0.904071	-1.58707	0.210354	0.616733	1.20089	-0.944755	0.287228	0.190431	0.300681	0.126338	0.916691
Q6PC12	Q6PC12	eno1a	9	2	75	668.57	DANRE	47415.2	2-phospho-D-glycerate hydro-lyase	NA	0.717601	0.00322161	0.0201892	0.449849	0.0564113	0.213682	0.0417356	0.84878	0.96348	0.309487	0.14349	0.283185	0.165948	0.634493	0.144649	-0.623778	0.403976	-0.47158	0.585268	0.169549	0.1328	-0.563032	0.339167	0.515484	-0.315667	0.284746	0.236347
Q6GQM9	Q6GQM9|F6NUZ4	eno2	29	18	65.6	396.02	DANRE	47182.5	2-phospho-D-glycerate hydro-lyase	NA	0.348781	0.0169587	0.0597845	0.585069	0.000961212	0.0166958	0.534423	0.00190814	0.0510858	0.298135	0.0358554	0.111779	0.129341	-0.222402	-0.0274312	-0.18964	0.551457	-0.051622	0.404657	-0.0944495	-0.203758	-0.337771	0.68399	0.352746	-0.483883	0.0132205	-0.334717
Q6PC89	Q6PC89	eno1b	9	4	45.7	271.64	DANRE	47644.7	2-phospho-D-glycerate hydro-lyase	NA	-0.2677	0.075798	0.167255	-0.89061	5.13044e-05	0.0029459	0.21507	0.174705	0.555175	0.83798	4.38856e-05	0.00128833	0.609201	-0.232147	0.678567	0.0144993	0.0319649	0.776753	-0.155168	-0.176508	1.27825	0.0646527	-0.0415483	-0.146192	0.0114387	-0.525104	-0.0997402
F1RDA6	F1RDA6|A0A2R8RNT6	ndufs1	141	48	73.1	864.25	DANRE	80486.7	NADH-ubiquinone oxidoreductase 75 kDa subunit, mitochondrial	SUBCELLULAR LOCATION: Membrane {ECO:0000256|ARBA:ARBA00004370}. Mitochondrion inner membrane {ECO:0000256|ARBA:ARBA00004273}.	0.555739	0.00266988	0.0178236	1.02035	2.88985e-05	0.00204597	0.450578	0.0155979	0.163535	-0.0140355	0.926746	0.955528	-0.0266244	0.0903706	-0.389954	-0.224171	0.669595	-0.535487	0.41106	0.380453	-0.347495	-0.606983	1.00573	0.211797	-0.229962	0.296919	-0.182302
Q6P3G1	Q6P3G1|F1Q8N4|F1RBQ0	cp	129	52	47.3	846.16	DANRE	125296	Ceruloplasmin	NA	0.120989	0.651003	0.752307	0.276935	0.344501	0.595226	0.579902	0.0608294	0.332309	0.423956	0.128927	0.263634	0.276683	0.242116	0.382232	-0.684118	0.0718584	0.0960847	1.23396	-0.330899	0.144937	-0.459849	0.199938	-0.010273	0.0729608	-0.212876	0.275118
A0A0R4IIB1	A0A0R4IIB1|A0A0R4IPQ8|A0A0R4INN0|A0A0R4ITL4|A0A0R4IFM0|A0A0R4IC53|A0A2R8Q7I9	cfh	98	47	61.8	841.72	DANRE	105524	Complement factor H	NA	-0.284715	0.29608	0.430871	0.38091	0.200621	0.440849	0.468113	0.121562	0.470038	-0.197512	0.463507	0.614931	-0.176444	0.114866	0.0296418	-0.056888	0.207908	0.635783	0.835287	-0.489012	-0.739756	0.143111	-0.0885467	-0.14006	0.234806	-0.0853826	0.218243
F1Q890	F1Q890|E9QGF2	plg	110	51	62.2	833.01	DANRE	94370.7	Plasminogen	SUBCELLULAR LOCATION: Secreted {ECO:0000256|ARBA:ARBA00004613, ECO:0000256|PIRNR:PIRNR001150}.	0.261719	0.110941	0.217492	0.304492	0.0883882	0.27474	0.344129	0.0577316	0.324641	0.301356	0.0706572	0.176046	0.295713	0.164853	0.45431	-0.3204	0.368213	-0.205869	0.645692	-0.0364973	0.0303294	-0.322134	0.330433	0.244137	-0.130408	0.043443	0.141999
Q66HV8	Q66HV8	pfkma	163	35	62.2	832.46	DANRE	86544	ATP-dependent 6-phosphofructokinase	SUBCELLULAR LOCATION: Cytoplasm {ECO:0000256|HAMAP-Rule:MF_03184}.	0.967789	2.27789e-05	0.0010862	1.1271	1.06016e-05	0.00122227	0.21613	0.204668	0.59954	0.0568225	0.710525	0.807861	-0.478839	0.347152	-0.577703	-0.281857	0.502323	-0.14989	0.815869	0.408173	-0.741913	-0.767352	0.601842	0.287434	-0.714491	0.652764	-0.411935
F1R047	F1R047|A0A2R8Q476|A0A2R8RZX5	pfkmb	74	28	49.7	684.97	DANRE	85278.7	ATP-dependent 6-phosphofructokinase	SUBCELLULAR LOCATION: Cytoplasm {ECO:0000256|HAMAP-Rule:MF_03184}.	0.624644	0.264895	0.397908	-0.0898573	0.879019	0.946165	-0.891176	0.147888	0.510565	-0.176674	0.746903	0.83148	0.342263	0.631077	-1.16775	0.317336	0.391769	-0.0561254	0.634394	0.135504	-0.357977	-0.418141	-2.22543	0.2481	-0.593898	0.951004	0.161813
E7F9M6	E7F9M6|A0A0R4IEX8	pfkla	21	15	23.9	258.14	DANRE	85530.2	ATP-dependent 6-phosphofructokinase	SUBCELLULAR LOCATION: Cytoplasm {ECO:0000256|HAMAP-Rule:MF_03184}.	-0.277564	0.0656474	0.152114	-0.0499777	0.742648	0.88252	0.111078	0.469278	0.817852	-0.116509	0.413672	0.568755	0.0286602	-0.0949231	0.180586	0.319989	0.132356	0.0222407	0.0988507	-0.135301	-0.055299	0.444485	-0.248999	-0.294421	-0.125204	0.0566105	0.00295347
A0A0R4ITA8	A0A0R4ITA8|E7FDP2|A0A2R8RK99|A0A2R8QEU0|F1R2A3	pfkpa	16	10	29.6	267.25	DANRE	87076.3	ATP-dependent 6-phosphofructokinase	SUBCELLULAR LOCATION: Cytoplasm {ECO:0000256|HAMAP-Rule:MF_03184}.	0.344463	0.0389845	0.105239	-0.501001	0.00864272	0.0655832	-0.250645	0.145734	0.509049	0.594819	0.001644	0.0139402	0.548175	0.30505	0.58256	-0.231664	0.102322	-0.0183177	-0.131775	0.0890957	0.644108	-0.0816785	-0.156156	0.307765	-0.366161	0.0531909	0.0567537
A0A0R4ID68	A0A0R4ID68	pfklb	13	10	24.2	259.08	DANRE	85988.6	ATP-dependent 6-phosphofructokinase	SUBCELLULAR LOCATION: Cytoplasm {ECO:0000256|HAMAP-Rule:MF_03184}.	-0.42636	0.0979951	0.199639	-0.0635807	0.809272	0.916312	-0.576046	0.0440933	0.279082	-0.938826	0.00177374	0.014664	-0.224004	0.310917	-0.418023	0.0433977	-0.391252	-0.637537	-0.312788	0.0931683	-0.100571	0.0908454	-0.521804	0.0759762	0.988703	0.189664	1.25222
X1WDM7	X1WDM7|E9QFJ1|A0A2R8QUB7|A0A2R8QDW4|F1QQS5	pfkpb	3	3	15.3	139.13	DANRE	86386.3	ATP-dependent 6-phosphofructokinase	SUBCELLULAR LOCATION: Cytoplasm {ECO:0000256|HAMAP-Rule:MF_03184}.	-0.107876	0.464049	0.592902	-0.0292256	0.852817	0.934806	-0.20517	0.207044	0.602326	-0.28382	0.0688978	0.173279	-0.0571794	0.45987	-0.052941	-0.120215	-0.112655	0.124593	0.00810516	0.000512492	-0.144764	0.179409	-0.0808454	0.100928	0.43805	0.0121756	0.507748
E7FCV2	E7FCV2	c5	89	59	37.8	831.42	DANRE	192976	Complement component 5	SUBCELLULAR LOCATION: Secreted {ECO:0000256|ARBA:ARBA00004613}.	0.0658134	0.659611	0.759486	0.523217	0.0056489	0.0503031	0.726514	0.000509727	0.0251456	0.269111	0.0884879	0.206363	0.0959025	-0.0601408	0.337401	-0.341435	0.409419	-0.02088	0.884529	-0.348182	-0.270221	-0.326481	0.382355	-0.0974518	-0.209114	-0.165211	-0.0572097
O57521	O57521	hsp90ab1	124	33	62.6	829.85	DANRE	83755.2	Heat shock protein HSP 90-beta	SUBCELLULAR LOCATION: Cytoplasm {ECO:0000250|UniProtKB:P08238}.	-0.0190979	0.878946	0.918937	0.0171834	0.899027	0.958589	-0.116296	0.397175	0.770536	-0.152577	0.236736	0.391536	-0.136618	0.137254	-0.0877527	-0.00993719	-0.037533	0.0141114	-0.154774	-0.0585072	0.0306801	-0.174889	0.109172	0.142829	0.1732	0.132761	0.442355
Q90474	Q90474	hsp90a.1	43	21	64.1	766.53	DANRE	83716.5	Heat shock protein HSP 90-alpha 1	SUBCELLULAR LOCATION: Melanosome {ECO:0000250|UniProtKB:P07900}. Cytoplasm, myofibril, sarcomere, Z line {ECO:0000269|PubMed:18347070}. Cytoplasm, myofibril, sarcomere, A band {ECO:0000269|PubMed:18347070}. Cytoplasm, perinuclear region {ECO:0000269|PubMed:18347070}. Note=Expressed at the Z line and in the perinuclear region of myofibrils. Shuttles between the Z line and A band in response to str…	0.227896	0.0991228	0.201035	-0.226789	0.125699	0.339389	-1.06524	3.74928e-06	0.00182907	-0.610554	0.000385791	0.00517062	-0.236428	0.594336	-0.185994	0.367208	-0.60507	-0.13926	-0.330062	0.701126	-0.386804	0.304931	-0.4566	0.218459	0.467095	0.891392	0.354497
Q5RG12	Q5RG12	hsp90aa1.2	7	5	46.8	581.29	DANRE	85088.7	Heat shock protein 90, alpha (cytosolic), class A member 1, tandem duplicate 2	NA	0.210677	0.111116	0.2177	-0.0368661	0.786012	0.905259	-0.252221	0.0806341	0.385948	-0.00467798	0.970274	0.982672	-0.18179	0.253396	-0.173845	-0.0543628	-0.0354294	0.1843	-0.110073	-0.151591	-0.193357	-0.0775679	-0.238615	0.365009	-0.179264	0.0299122	-0.0347852
A0A2R8RKV0	A0A2R8RKV0|F1Q9X9	trap1	24	19	26.3	280.25	DANRE	89237	TNF receptor-associated protein 1	NA	0.495202	0.000274872	0.00455153	0.193479	0.096691	0.28948	-0.163665	0.153732	0.523474	0.138057	0.190741	0.341568	0.0840302	0.267943	-0.00362346	-0.120951	0.161068	-0.0706957	0.105228	0.494252	0.0830516	-0.256544	0.383713	0.488682	-0.144568	0.270463	0.0625962
F5H8N4	F5H8N4	lrpprc	90	61	41.2	828.56	DANRE	165105	Leucine-rich pentatricopeptide repeat-containing	NA	0.462821	0.00271499	0.0179734	0.203858	0.155215	0.38181	-0.0488354	0.723381	0.926826	0.210128	0.116856	0.24601	0.278355	0.142756	0.107176	0.00877464	0.165477	-0.0397367	0.120064	0.427271	-0.123384	-0.181798	0.492841	0.364717	-0.378488	0.298439	-0.0665886
Q6P3L3	Q6P3L3	hspa5	138	46	60.7	819.41	DANRE	72160.4	78 kDa glucose-regulated protein	SUBCELLULAR LOCATION: Endoplasmic reticulum lumen {ECO:0000256|ARBA:ARBA00004319}.	-0.0855739	0.765946	0.838752	0.184552	0.554359	0.76818	-0.217625	0.486864	0.82643	-0.487751	0.10705	0.231383	-0.234336	0.273168	-0.347256	-0.358744	-0.331716	-0.720444	0.000128437	0.0797289	0.218936	-0.352334	0.0729178	0.190626	0.661793	-0.0179155	0.917189
A0A2R8Q860	A0A2R8Q860|Q6NYR4|A0A2R8QEN9|A0A0R4IMF8|Q1LY29|Q1LY27	hspa8	19	2	68.1	790.24	DANRE	71995.9	Heat shock cognate 71 kDa protein	NA	-0.331685	0.00595826	0.029895	-0.231284	0.0537005	0.206749	-0.0886053	0.430594	0.794096	-0.189006	0.0837516	0.198828	0.128007	0.133001	0.0161907	0.138523	-0.183157	0.257743	-0.0536533	-0.116683	0.100913	0.208438	-0.0799017	-0.092061	0.400161	0.00788183	0.511757
Q6PGX4	Q6PGX4	hsc70	69	21	63.9	747.06	DANRE	71173.1	Heat shock cognate 70	NA	0.0797817	0.668485	0.766257	0.0286249	0.886515	0.951166	-0.464401	0.0347181	0.247803	-0.413244	0.041142	0.122745	0.284769	0.351502	-0.045595	0.443991	-0.407884	-0.319283	0.220546	0.484754	-0.395064	0.285881	-0.0831682	0.0168539	0.107264	0.643819	0.340667
F1R9V3	F1R9V3|R4GEU2	hspa8b	10	7	45.9	533.66	DANRE	71434.4	Heat shock protein family A (Hsp70) member 8b	NA	-0.497962	0.10151	0.204246	0.256526	0.415534	0.659715	-0.0672558	0.828874	0.956677	-0.821743	0.0123024	0.0538113	-0.449872	-0.314755	-0.465286	0.978649	0.100926	0.270561	-0.322752	-0.231337	-1.07027	0.332789	-0.29475	-0.310507	0.290877	0.436854	-0.0302142
A5PMG2	A5PMG2	hspa1b	14	11	37.5	364.51	DANRE	70942.9	Heat shock protein family A (Hsp70) member 1B	NA	0.615432	0.00325198	0.0202793	-0.303656	0.123572	0.33673	-1.22379	1.7292e-05	0.00476807	-0.3047	0.0976837	0.21849	-0.19206	0.796288	-0.405576	0.154723	-0.896259	0.107131	-0.375492	0.514004	-0.293043	-0.0538626	-0.226877	0.932441	-0.0837136	0.654247	0.418103
E7FBD5	E7FBD5	iqgap1	84	50	35.6	817.12	DANRE	189069	IQ motif-containing GTPase-activating protein 1	NA	-0.0927899	0.435787	0.56739	-0.146219	0.26188	0.513317	0.541763	0.000816311	0.0319229	0.595193	0.000192372	0.00326159	0.584947	-0.120818	0.484971	-0.262635	0.274659	0.213793	0.428427	-0.448801	0.415779	-0.0489609	0.132874	-0.0922621	-0.23812	-0.39056	-0.131565
A2CE93	A2CE93|F1QAC1	iqgap2	8	8	6.6	123.15	DANRE	192547	IQ motif-containing GTPase-activating protein 2	NA	-0.366804	0.102025	0.204891	-0.570415	0.025083	0.128682	0.138855	0.54786	0.857576	0.342466	0.124395	0.256516	0.913165	-0.137591	0.579683	0.0456005	-0.336141	-0.231949	0.110609	-0.160671	0.806489	0.0359171	0.0648281	-0.262478	0.378831	-0.208954	0.237175
A0A0G2KFQ1	A0A0G2KFQ1	A0A0G2KFQ1	4	2	2.5	24.09	DANRE	189312	IQ motif-containing GTPase-activating protein 3	NA	-0.691731	0.267267	0.400332	-0.746881	0.267434	0.519228	0.852692	0.208743	0.604827	0.907841	0.152252	0.293801	0.764359	-1.39721	0.709043	-0.20007	-1.54544	-1.61139	-0.178109	-1.22804	0.775793	0.413327	-0.0387439	-1.24372	-1.75104	-1.89151	-1.45578
Q6PFS4	Q6PFS4	immt	121	48	60.6	809.44	DANRE	83654.8	MICOS complex subunit MIC60	SUBCELLULAR LOCATION: Membrane {ECO:0000256|ARBA:ARBA00004167}; Single-pass membrane protein {ECO:0000256|ARBA:ARBA00004167}. Mitochondrion inner membrane {ECO:0000256|ARBA:ARBA00004434, ECO:0000256|RuleBase:RU363000}; Single-pass membrane protein {ECO:0000256|ARBA:ARBA00004434, ECO:0000256|RuleBase:RU363000}.	0.878876	0.00195281	0.0149214	0.664559	0.0178699	0.105017	-0.331701	0.198751	0.594567	-0.117384	0.613261	0.73623	0.226126	0.401313	-0.224749	-0.18825	-0.0144055	-0.954554	0.166424	0.810224	-0.626266	-0.499085	0.657076	0.658941	-0.355033	0.535119	-0.067537
F1R9Y8	F1R9Y8|E9QDS1	hdlbpa	83	52	46.2	808.12	DANRE	141846	High density lipoprotein-binding protein a	NA	-0.208991	0.274213	0.408038	-0.229385	0.266895	0.51857	-0.12914	0.524977	0.847442	-0.108747	0.562587	0.6958	-0.0148923	-0.0117769	0.0672102	-0.219479	-0.280907	-0.00509524	0.0506492	0.0232001	0.370876	-0.0510684	-0.144323	0.0793671	0.782	-0.0736701	0.341633
E7FCA5	E7FCA5	hdlbpb	9	6	6.1	97.58	DANRE	141886	High density lipoprotein-binding protein b	NA	0.600226	0.00599921	0.0300292	0.526073	0.01957	0.110699	-0.243187	0.239721	0.641211	-0.169035	0.371707	0.528948	0.124642	0.385514	-0.0109323	-0.192299	-0.0694596	-0.807736	0.437884	0.495222	-0.455892	-0.235913	0.347357	0.434102	-0.0557958	0.612286	0.0102283
A0A2R8QE60	A0A2R8QE60|Q5PZ43|F8W4Z1	xirp1	81	59	27.7	796.62	DANRE	262978	Xin actin-binding repeat-containing protein 1	NA	1.38837	4.01974e-06	0.000432088	0.885105	0.000606233	0.0129432	-0.733097	0.00254916	0.059219	-0.229837	0.228218	0.383142	-0.908146	0.558035	-0.850158	-0.435963	-0.236886	-0.32366	0.359096	1.07053	-1.04466	-0.528511	0.188135	0.914025	-0.39774	0.803593	-0.845066
E7FBD3	E7FBD3	apoba	82	60	15.1	777.92	DANRE	498088	Apolipoprotein Ba	NA	-0.548777	0.0288324	0.0860898	0.121161	0.623394	0.814871	0.195356	0.432026	0.794096	-0.474582	0.0532788	0.146571	0.0721559	-0.125833	0.295126	0.183844	0.0311595	-0.0807671	0.514823	0.218037	-0.288929	0.473451	-0.184311	-0.690135	0.557612	0.298736	0.681004
Q803B0	Q803B0	hspd1	115	42	79.1	776.14	DANRE	61423.6	60 kDa chaperonin	NA	0.0181967	0.929912	0.955061	-0.147141	0.513813	0.737029	-0.695404	0.00745178	0.111565	-0.530066	0.0216886	0.079705	0.0568743	0.488318	-0.0985441	0.126831	-0.398425	-0.615903	-0.401647	0.368203	0.0615164	-0.102464	-0.088393	0.339112	0.698769	0.401364	0.801073
A0A2R8QPG3	A0A2R8QPG3|B3DKC5	lmna	108	50	61.7	771.76	DANRE	75972.5	Lamin A	NA	0.101204	0.48968	0.615554	0.0468193	0.765538	0.895195	0.265636	0.107936	0.44624	0.32002	0.0427683	0.125844	0.521433	0.0851648	0.458254	0.0543018	0.103008	-0.0699536	0.549677	-0.132667	0.117017	-0.0350783	0.257836	0.179589	-0.19981	0.0193983	-0.0727438
A0A2R9YJH5	A0A2R9YJH5|A0A0R4IFJ7|Q7ZUU6|A0A2R8Q084	ckmt2a	417	27	78.1	768.15	DANRE	47294.2	Creatine kinase	NA	0.613029	0.00707711	0.0337466	0.227828	0.291042	0.546006	0.263883	0.224763	0.62301	0.649084	0.00493939	0.0286034	0.49939	0.036782	0.252962	-0.0494702	0.566166	0.319645	0.0801192	0.535616	0.080822	-0.656826	0.901814	0.0519478	-0.519797	0.384257	-0.217423
A8E5J9	A8E5J9|A2CEA5|F6NMS7|A2CEA4|A0A0R4IJU9|F6PA24	ckmt2b	126	19	79.1	687.55	DANRE	46738.3	Creatine kinase	NA	0.795059	0.000522412	0.00659987	0.401738	0.0513247	0.201019	0.0410647	0.829567	0.956677	0.434386	0.0263196	0.0906663	0.411299	0.302406	0.144791	-0.219969	0.158475	-0.394218	0.566451	0.593533	0.0356689	-0.562493	0.628444	0.473664	-0.576635	0.27063	-0.180906
Q7ZUN7	Q7ZUN7|E9QB96	ckmt1	32	12	55.1	341.15	DANRE	47161.9	Creatine kinase	NA	-0.8006	0.0860907	0.182239	0.350184	0.465078	0.698002	0.0809062	0.86461	0.970334	-1.06988	0.0276034	0.0936507	-0.809449	-1.05439	-0.766766	0.650329	-0.553727	-1.24816	-0.733201	-0.80064	-1.49019	1.24198	-0.898445	-0.898823	-0.624483	-0.483602	-1.30288
A5PMP8	A5PMP8|A0A2R8RVX2	c3b.2	74	6	35	767.95	DANRE	190232	Complement component c3b, tandem duplicate 2	SUBCELLULAR LOCATION: Secreted {ECO:0000256|ARBA:ARBA00004613}.	0.0102275	0.959618	0.973744	0.0653606	0.764902	0.895044	0.420169	0.071636	0.360936	0.365036	0.0886153	0.206584	0.239099	0.0533411	0.77265	-0.239548	0.169852	-0.0897207	0.825995	-0.340189	0.145871	-0.145667	0.00115981	-0.0596203	-0.0321499	-0.00486636	0.0251197
A0A0N4SU63	A0A0N4SU63|A5PMP6	c3b.1	3	2	32.8	748.54	DANRE	189327	Complement component c3b, tandem duplicate 1	SUBCELLULAR LOCATION: Secreted {ECO:0000256|ARBA:ARBA00004613}.	-0.273873	0.155365	0.273473	0.308466	0.139773	0.360739	0.374903	0.0783073	0.37957	-0.207436	0.273735	0.430651	-0.252395	-0.0343308	0.555601	0.151987	0.160848	-0.264792	0.634176	-0.206239	-0.175165	0.267001	0.0278101	-0.178274	0.260063	0.0163428	0.0139401
A0A0N4STW3	A0A0N4STW3	c3b.1	2	2	33.8	747.84	DANRE	180008	Complement component c3b, tandem duplicate 1	SUBCELLULAR LOCATION: Secreted {ECO:0000256|ARBA:ARBA00004613}.	-0.179543	0.463311	0.592457	-0.201378	0.446692	0.685228	0.077732	0.766727	0.941937	0.099567	0.681971	0.787539	0.326915	0.210773	0.566252	-0.0502761	-0.341544	-0.36574	0.621881	-0.251512	0.497491	0.387623	-0.115783	-0.229917	0.214691	0.179134	0.0746122
F6P0C3	F6P0C3	c3b.2	2	2	25.5	104.8	DANRE	33598.1	Complement component c3b, tandem duplicate 2	NA	0.273531	0.440878	0.571687	-0.0448824	0.9057	0.961137	0.428269	0.269989	0.66964	0.746682	0.0493166	0.139152	0.50609	0.30962	1.20189	-0.469396	-0.115779	-0.508378	1.12583	-0.317523	0.854293	-0.427442	0.395727	0.18749	-0.252769	-0.0182948	0.216775
F1QF00	F1QF00	pgm1	150	40	79.5	763.8	DANRE	61472.8	Phosphoglucomutase 1	NA	0.328968	0.0211299	0.0696497	0.0123648	0.928582	0.970999	0.150541	0.286208	0.682412	0.467145	0.00258339	0.0187215	0.358801	0.178583	0.453544	-0.169792	0.165605	0.441541	0.392637	0.257191	-0.0089483	-0.315306	0.412555	-0.0560173	-0.135511	0.312476	-0.00303199
B3DFN3	B3DFN3	lmnb2	107	50	71.5	759.07	DANRE	66103.7	Lamin B2	NA	0.498176	0.00241627	0.0167658	0.31005	0.0494549	0.196521	0.11578	0.432608	0.794096	0.303906	0.0391457	0.118814	0.21743	0.205875	0.0612298	-0.489294	0.0816567	-0.161708	0.550684	0.157058	-0.0317039	-0.222482	0.361745	0.426802	-0.352901	0.0725932	-0.0656988
F1QHC4	F1QHC4|F1Q5F3|E9QCX6|E9QIC9	lmnb1	68	43	75	679.79	DANRE	66902.5	Lamin B1	NA	0.402303	0.00230999	0.0162777	0.168386	0.166121	0.394872	-0.319228	0.0156877	0.163974	-0.0853118	0.436304	0.589769	0.0318889	0.363246	0.0110195	-0.110707	-0.0777891	-0.189491	0.23685	0.392476	-0.222152	-0.078509	0.0695477	0.559783	-0.011376	0.266218	0.173105
Q66I42	Q66I42|A0A2R8Q5G6|A0A2R8QLR0|A0A2R8RLT8|E7F638	msna	129	45	70.1	758.06	DANRE	68203.1	Moesin a	SUBCELLULAR LOCATION: Cytoplasm, cytoskeleton {ECO:0000256|ARBA:ARBA00004245}. Membrane {ECO:0000256|ARBA:ARBA00004287}; Peripheral membrane protein {ECO:0000256|ARBA:ARBA00004287}; Cytoplasmic side {ECO:0000256|ARBA:ARBA00004287}.	0.38623	0.020555	0.0683845	-0.00229194	0.988645	0.99386	-0.134209	0.411065	0.779443	0.254313	0.105959	0.229705	0.208111	0.332517	0.202566	-0.255004	-0.069865	0.316061	0.315594	0.31587	-0.06413	-0.358227	0.244351	0.433625	-0.0121256	0.108264	0.270713
Q5TZG5	Q5TZG5|R4GDR8	ezrb	46	25	53	475.76	DANRE	68838.9	Ezrin	SUBCELLULAR LOCATION: Cytoplasm, cytoskeleton {ECO:0000256|ARBA:ARBA00004245}. Membrane {ECO:0000256|ARBA:ARBA00004287}; Peripheral membrane protein {ECO:0000256|ARBA:ARBA00004287}; Cytoplasmic side {ECO:0000256|ARBA:ARBA00004287}.	0.62675	0.00623005	0.0308438	-0.136026	0.523105	0.744125	-0.292222	0.182243	0.56801	0.470553	0.0292927	0.0972995	0.517845	0.437223	0.523371	-0.55273	-0.126142	-0.0910362	0.194898	0.516066	0.083213	-0.46546	0.298212	0.511554	-0.0474272	0.193337	0.216797
Q503E6	Q503E6	ezra	19	16	36.8	337.96	DANRE	70210.5	Ezrin a	SUBCELLULAR LOCATION: Cytoplasm, cytoskeleton {ECO:0000256|ARBA:ARBA00004245}. Membrane {ECO:0000256|ARBA:ARBA00004287}; Peripheral membrane protein {ECO:0000256|ARBA:ARBA00004287}; Cytoplasmic side {ECO:0000256|ARBA:ARBA00004287}.	-0.265679	0.277904	0.411119	-0.0954965	0.712271	0.867802	-0.187836	0.47163	0.819307	-0.358018	0.151065	0.292268	-0.32809	-0.481374	-0.222515	0.449616	-0.0812953	0.0212222	-0.623667	0.0479777	-0.439323	0.695746	-0.308057	-0.0656612	-0.226931	-0.100292	-0.455066
E7FFZ3	E7FFZ3	si:dkey-46g23.2	102	12	36	757.76	DANRE	159673	Si:dkey-46g23.2	SUBCELLULAR LOCATION: Secreted {ECO:0000256|ARBA:ARBA00004613}.	-1.22431	0.363395	0.498626	-2.18984	0.142964	0.365061	-1.6747	0.254298	0.657197	-0.709175	0.594504	0.721396	-1.90631	0.659939	-1.32901	-2.55534	-2.44931	-1.70934	-2.35245	-2.28522	2.23002	-2.06712	-3.80372	-0.363302	1.8999	-2.78659	2.84462
F1QIP9	F1QIP9|F1QF63|A0A0G2KYV6	F1QIP9	55	29	36.3	748.04	DANRE	159565	Zgc:165518	SUBCELLULAR LOCATION: Secreted {ECO:0000256|ARBA:ARBA00004613}.	-1.11702	0.297111	0.431975	-1.52466	0.193162	0.431585	-1.13571	0.325188	0.720047	-0.728075	0.49136	0.638204	-1.18072	0.666596	-0.911982	-1.66275	-1.70826	-1.35992	-1.73959	-1.67347	1.82921	-1.58837	-2.34369	-0.244952	1.90593	-1.92737	2.63407
F1RED5	F1RED5|A0A2R8QML3|F1RCB4	F1RED5	9	5	35.5	741.4	DANRE	159591	Zgc:171446	SUBCELLULAR LOCATION: Secreted {ECO:0000256|ARBA:ARBA00004613}.	-0.328822	0.822813	0.879683	-2.24908	0.17182	0.404287	-2.13955	0.192134	0.585141	-0.21929	0.881222	0.928187	-2.13639	1.52539	-1.40179	-2.9094	-2.62932	-1.8888	-2.80552	-2.58502	2.66196	-2.56851	-3.38617	0.917186	1.62791	-3.06069	1.96215
B7ZVK0	B7ZVK0|A0A2R8RLB3|A0A2R8QN17|E7F2C7	B7ZVK0	10	5	29.4	609.18	DANRE	160018	Zgc:171445	SUBCELLULAR LOCATION: Secreted {ECO:0000256|ARBA:ARBA00004613}.	-1.3983	0.140513	0.25622	-1.36954	0.178155	0.412805	-1.22735	0.224346	0.622652	-1.25611	0.181959	0.330319	-1.59542	0.835701	-1.2745	-0.804671	-1.51856	-1.09027	-2.1067	-1.69938	1.62711	-0.764035	-2.23318	-0.283638	1.88449	-1.75456	2.37555
F1QS86	F1QS86|F1R2I8	si:dkey-46g23.5	22	14	25.1	536.73	DANRE	162942	Si:dkey-46g23.5	NA	-1.35929	0.174883	0.29742	-1.50592	0.164838	0.392912	-1.01387	0.339636	0.728925	-0.86724	0.376393	0.533581	-1.46604	0.223831	-0.917009	-1.19006	-1.48033	-1.28329	-1.8683	-1.61422	2.06484	-1.11685	-2.37025	-0.667631	1.22706	-1.51169	2.94732
E7FCS3	E7FCS3	E7FCS3	34	22	29.7	494.51	DANRE	155188	Zgc:165453	NA	-1.15976	0.230968	0.360522	-1.35815	0.196204	0.434598	-0.859305	0.404162	0.77519	-0.660914	0.486425	0.633662	-1.12167	0.361626	-0.661897	-1.37011	-1.42383	-1.10268	-1.49256	-1.42896	1.81359	-1.29275	-1.96254	-0.425856	1.33459	-1.57484	2.89927
F1REP2	F1REP2	F1REP2	21	13	33.7	324.93	DANRE	87421.2	Zgc:171426	NA	-1.05634	0.0292235	0.0868082	-1.23928	0.019626	0.110719	-0.0998137	0.833374	0.957648	0.0831267	0.849877	0.90527	0.470151	0.344754	0.513583	-0.018711	-0.35198	0.296514	-0.897821	-0.851134	1.36244	-0.189341	-0.486026	-0.222256	0.735105	-1.18655	1.78313
F1R6N3	F1R6N3|F8W331|F1QSK0	anxa6	128	47	72.7	755.86	DANRE	65734.7	Annexin	SUBCELLULAR LOCATION: Melanosome {ECO:0000256|ARBA:ARBA00004223}.	0.951078	0.000174173	0.00348577	0.0617891	0.758682	0.891364	-0.253748	0.220225	0.616631	0.635542	0.00409826	0.0254019	0.542063	0.314433	0.364858	-0.305251	-0.169029	0.0021041	0.584304	0.62823	-0.168528	-0.507193	0.325465	0.451293	-0.656832	0.608688	-0.332392
Q6P0V8	Q6P0V8|A0A0R4IKN3	anxa5b	58	25	75.7	431.87	DANRE	35259.3	Annexin	NA	0.410025	0.234882	0.364745	-0.276858	0.449986	0.687558	-0.146398	0.687109	0.91358	0.540485	0.12466	0.256847	0.50869	0.555272	0.664782	-0.777841	-0.424568	-0.335605	0.667516	0.127562	0.811845	-0.437407	0.163763	0.447528	0.124653	-0.00248865	0.578369
F8W2N0	F8W2N0	anxa11b	39	16	37.3	298.94	DANRE	51924.7	Annexin	NA	0.415483	0.104579	0.208939	0.262562	0.325681	0.578846	-0.0150383	0.954224	0.989685	0.137883	0.572158	0.703794	0.157833	0.505546	0.0665976	-0.662415	0.101339	-0.45914	0.612543	-0.0294509	0.306107	-0.376566	0.127351	0.444836	0.232436	0.260867	0.32641
Q803Q7	Q803Q7	aldoaa	517	15	89.2	751.5	DANRE	40253.2	Fructose-bisphosphate aldolase	NA	0.969407	9.45339e-05	0.00246722	0.145252	0.453051	0.68901	0.233072	0.236583	0.63793	1.05723	4.13901e-05	0.00123218	0.556117	0.264947	0.658906	-0.654667	0.274605	0.215291	0.713842	0.432607	0.204246	-1.10351	0.673228	0.152265	-0.537202	0.433461	-0.298969
Q6P043	Q6P043	aldoab	106	14	89.2	733.15	DANRE	39980.9	Fructose-bisphosphate aldolase	NA	0.829625	0.00122633	0.0111265	0.274463	0.228641	0.474106	-0.113198	0.610951	0.883726	0.441964	0.0468765	0.134352	0.333338	0.457321	0.293098	-0.457211	-0.0627446	-0.127433	0.499484	0.683179	-0.101403	-0.696492	0.684848	0.312853	-0.368826	0.49489	0.152271
Q8JH70	Q8JH70	aldocb	45	20	84.5	459	DANRE	39715.1	Fructose-bisphosphate aldolase C-B	NA	0.706889	0.00267471	0.017837	0.128071	0.544477	0.75941	-0.422014	0.0612496	0.333429	0.156804	0.425376	0.579195	0.0916231	0.809209	0.0896701	-0.458042	0.0821476	-0.142814	0.183459	0.284993	-0.119229	-0.449444	0.0580455	0.845588	-0.135152	0.1798	0.334673
Q8JH71	Q8JH71|A0A2R8QH08|E9QF34|E9QBQ4|A0A0R4IU94	aldob	50	18	68.9	411.1	DANRE	39743.4	Fructose-bisphosphate aldolase B	SUBCELLULAR LOCATION: Cytoplasm, cytoskeleton, microtubule organizing center, centrosome, centriolar satellite {ECO:0000250}.	-1.13636	0.015473	0.0563642	0.0938197	0.834418	0.927252	-0.213287	0.635861	0.893425	-1.44346	0.00366665	0.0236383	-0.52368	-1.02327	-0.756076	1.19241	-0.757947	-1.56817	-0.71177	-0.54904	-1.21839	1.25001	-1.29856	-0.741225	0.179322	-0.524357	-0.914206
A0A2R8Q2N0	A0A2R8Q2N0|I3ITN9	aldh1l1	85	41	57.8	747.74	DANRE	101037	10-formyltetrahydrofolate dehydrogenase	NA	-0.59723	0.179656	0.302956	0.0431405	0.925843	0.969272	0.110469	0.811798	0.953036	-0.529902	0.230354	0.385402	-0.43029	-0.801922	-0.590521	0.663285	0.316693	0.541632	-0.949758	0.120463	-0.891261	0.959301	-0.265344	-0.754557	-0.0579331	-0.203737	-0.815486
E7EXW7	E7EXW7|X1WBH6	aldh1l2	28	19	31.5	391.88	DANRE	101365	10-formyltetrahydrofolate dehydrogenase	NA	-0.478147	0.0186694	0.0639662	-0.348917	0.0923885	0.281739	-0.431413	0.0427841	0.273801	-0.560644	0.00769846	0.0388353	-0.0686036	-0.224723	-0.173922	0.640437	-0.262357	0.236351	-0.70076	0.1677	-0.491413	0.646346	-0.456824	-0.23955	0.351656	0.128971	0.106549
Q6P3G5	Q6P3G5	ampd1	126	40	56.4	739.15	DANRE	83562.9	AMP deaminase	NA	0.349971	0.212445	0.33895	-0.533579	0.0871518	0.272634	-0.276727	0.354492	0.737981	0.606823	0.0407406	0.122029	0.708743	0.612048	0.807618	-0.252212	-0.483677	0.147011	0.686873	-0.00496281	0.568588	-0.527853	-0.129963	0.168822	0.180435	0.428645	0.404297
Q1LYD7	Q1LYD7|Q1LYD6|Q1LYD5	ampd3b	29	22	39.1	425.76	DANRE	90800.8	AMP deaminase	NA	-0.12705	0.440218	0.571277	-0.0922844	0.601358	0.802444	0.546331	0.0074869	0.111565	0.511565	0.00698719	0.0364357	0.400625	-0.341901	0.298252	0.0411319	0.617722	0.490712	0.0635374	-0.279018	0.152016	0.122258	0.0480915	-0.370527	-0.459774	-0.221409	-0.408273
F8W432	F8W432|A0A2R8QFX5|A0A2R8PWK1	ampd3a	7	7	17.2	203.44	DANRE	91479.8	AMP deaminase	NA	0.429865	0.00116271	0.0107964	0.234091	0.0565683	0.213766	0.00180625	0.987348	0.996754	0.19758	0.0787114	0.1905	-0.044544	0.263592	-0.0421402	-0.0236362	0.227865	0.118604	0.15871	0.0536689	-0.044815	-0.264063	0.306026	0.440087	-0.142986	0.158896	-0.372531
F1QFC0	F1QFC0	hspa9	126	44	61.1	738	DANRE	74350.1	75 kDa glucose-regulated protein	NA	0.36705	0.0385686	0.10453	0.264018	0.149089	0.373236	-0.164509	0.35652	0.737981	-0.0614775	0.705765	0.804468	0.130512	0.193524	0.0186921	0.0849022	0.0285388	-0.576363	-0.0869835	0.35798	-0.199459	-0.287302	0.380536	0.235749	-0.263556	0.300238	0.0852479
F1QL68	F1QL68|E7F8Q5|A0A2R8QKJ2	huwe1	77	57	13.4	733.4	DANRE	492058	HECT-type E3 ubiquitin transferase (Fragment)	NA	0.109764	0.252411	0.38382	0.0621218	0.541033	0.757633	-0.0372304	0.712799	0.92313	0.0104119	0.911245	0.945078	0.0275869	0.0893999	-0.00912979	-0.0677087	-0.0223515	0.0292411	0.256046	0.154449	0.0990344	-0.100273	0.0627208	0.180232	0.0353611	0.120061	0.237705
F1RCB6	F1RCB6|A0A0R4IEZ2|A0A2R8RQJ8	actc1a	32	4	77.7	631.1	DANRE	42317.6	Actin alpha cardiac muscle 1a	NA	0.188798	0.504744	0.629268	-0.286876	0.352173	0.601916	0.0162311	0.957279	0.990081	0.491905	0.0974163	0.218275	0.841766	0.235129	0.556468	0.26448	-0.0209038	-0.211779	0.439638	-0.306503	0.0790702	0.157173	-0.330218	0.115114	-0.79701	0.0093575	-0.326738
F8W3L1	F8W3L1	F8W3L1	24	4	82	606.88	DANRE	37746.5	Actin alpha 2, smooth muscle (Fragment)	NA	-1.15188	9.61071e-05	0.00249423	-0.675875	0.00990012	0.0725997	-0.143016	0.533374	0.85184	-0.61902	0.0105341	0.0488282	-0.258142	-0.708931	-0.0351682	0.58567	-0.51097	-0.55593	-1.07733	-0.818696	0.165062	0.869548	-0.952461	-0.821755	-0.0566296	-0.466231	0.393314
B3DJR0	B3DJR0|A0A2R8QKP3	cmya5	64	47	33.5	728.66	DANRE	199367	Cardiomyopathy associated 5 like	NA	0.44079	0.000483192	0.00630993	0.0730378	0.489548	0.717842	-0.190938	0.0860092	0.399319	0.176813	0.0859481	0.202418	0.267988	0.308672	0.00340841	-0.0628548	0.0483568	0.111556	0.269559	0.410069	-0.0990112	-0.178264	0.114154	0.203431	-0.0899406	0.417676	-0.092252
A8WGC6	A8WGC6	atp5f1b	334	32	81.2	728.64	DANRE	55243.3	ATP synthase subunit beta	NA	1.24259	0.000236601	0.00411007	0.897191	0.00512233	0.0474171	0.169036	0.536667	0.852871	0.514436	0.0574544	0.153916	0.157025	0.426496	0.0811819	-0.748999	0.39313	-0.839971	0.522941	0.677274	-0.191685	-1.20696	1.18041	0.554776	-0.629173	0.460622	-0.266061
Q6IQX2	Q6IQX2	col1a2	242	41	31.8	726.86	DANRE	127664	Collagen, type I, alpha 2	NA	0.872192	0.023276	0.0740304	-0.498728	0.196224	0.434598	-1.66761	0.000556834	0.0253812	-0.296692	0.397102	0.551473	0.114933	0.27061	-0.400927	-0.401467	-0.664544	-0.217496	-0.345869	0.830109	-1.16191	0.271962	-1.73482	1.2739	-0.443012	0.635523	0.0938888
F1Q8J4	F1Q8J4	acadvl	134	37	62	726.06	DANRE	71597.1	Acyl-CoA dehydrogenase very long chain	NA	0.512142	0.0308215	0.09012	0.14587	0.533651	0.75278	-0.0820088	0.724979	0.926826	0.284264	0.201498	0.354767	0.244645	0.109184	-0.00185482	0.206293	0.408873	0.025465	-0.453691	0.294629	-0.163786	-0.399725	0.56078	0.316162	-0.575101	0.29601	-0.264054
F1QIL6	F1QIL6	acad9	51	30	50.3	476.86	DANRE	70039.2	Acyl-CoA dehydrogenase family, member 9	NA	0.471229	0.0355142	0.0998365	0.428579	0.0697892	0.242067	-0.00993987	0.964108	0.991305	0.0327096	0.872983	0.922291	0.0808566	0.0685042	-0.201517	0.145083	0.419551	-0.320884	-0.357842	0.304786	-0.503738	-0.342712	0.515067	0.224475	-0.568889	0.21103	-0.309603
A0A0R4IFJ4	A0A0R4IFJ4	pcxa	95	33	44.9	724.34	DANRE	130779	Pyruvate carboxylase	NA	-0.903065	1.02278e-05	0.000744905	0.132727	0.358896	0.607744	0.218481	0.141603	0.503695	-0.817311	2.80693e-05	0.000999102	-0.42217	-0.44453	-0.483315	0.491266	0.142458	-0.160744	-0.4575	-0.543917	-0.414175	0.338936	-0.397079	-0.496493	0.56544	-0.338479	0.3932
F1QYZ6	F1QYZ6|B0S5R6	pcxb	9	7	23	348.74	DANRE	130844	Pyruvate carboxylase	NA	-0.563093	0.0134422	0.0514347	-0.245478	0.268667	0.520825	-0.244012	0.2714	0.670689	-0.561627	0.0136347	0.0576677	-0.641703	-0.405879	-0.178617	0.480264	-0.192317	-0.411041	-0.731005	-0.0999109	0.265697	0.575233	-0.53736	-0.10536	0.254386	-0.360378	-0.029037
Q6DGE9	Q6DGE9|E9QD76	unc45b	79	53	55.1	723.05	DANRE	105272	Protein unc-45 homolog B	SUBCELLULAR LOCATION: Cytoplasm, myofibril, sarcomere, Z line {ECO:0000269|PubMed:18347070, ECO:0000269|PubMed:20440001}. Cytoplasm, myofibril, sarcomere, A band {ECO:0000269|PubMed:18347070, ECO:0000269|PubMed:20440001}. Cytoplasm, perinuclear region {ECO:0000269|PubMed:18347070, ECO:0000269|PubMed:20440001}. Note=Expressed at the Z line and in the perinuclear region of myofibrils. Translocates …	0.713292	0.00173833	0.013946	-0.083839	0.675176	0.846249	-0.858793	0.000753401	0.0308262	-0.0616616	0.738882	0.82676	0.190276	0.611975	-0.0642704	-0.28768	-0.30124	-0.422551	0.248537	0.783562	-0.126186	-0.165566	-0.515863	0.555402	0.327099	0.726147	-0.0499371
F1Q781	F1Q781|Q6P3L0|E9QEQ6	mvp	66	39	57.4	717.25	DANRE	97581.8	Major vault protein	SUBCELLULAR LOCATION: Cytoplasm {ECO:0000256|ARBA:ARBA00004496}.	-0.526316	0.00971798	0.04117	-0.0413159	0.828908	0.924231	0.327784	0.104045	0.43873	-0.157216	0.381387	0.53766	0.128128	0.0733043	0.303525	-0.0535629	-0.101949	0.0158619	0.31519	-0.378016	0.324767	0.218505	0.242021	-0.0752978	0.454868	-0.32411	0.781335
Q6NX09	Q6NX09|A0A2R8RKK2	hk1	95	40	53.3	713.79	DANRE	104011	Hexokinase	NA	0.59133	0.000125038	0.00292616	0.500348	0.000997021	0.0170938	0.155433	0.210881	0.605986	0.246415	0.0422749	0.124914	0.1807	0.278628	0.0326268	-0.219258	0.222384	-0.173436	0.572131	0.206217	-0.213144	-0.361352	0.576588	0.38346	-0.292251	0.338102	-0.286052
B8JKC9	B8JKC9|A0A2R8PXN0|A0A2R8QIG3	hk2	20	17	22.6	252.34	DANRE	103513	Hexokinase	NA	0.280192	0.0522552	0.129144	0.219365	0.145317	0.368109	0.157623	0.285636	0.6823	0.218451	0.119564	0.249595	0.0706206	0.112724	0.0914839	-0.0801564	0.264991	0.0190204	0.156962	0.341362	0.271983	-0.399612	0.575971	0.146761	-0.133142	0.0992257	0.192215
A0A2R8QAA9	A0A2R8QAA9|B8A5H6	hkdc1	6	6	9.9	134.01	DANRE	103859	Hexokinase	NA	-0.854092	0.0579898	0.13936	-0.491087	0.288126	0.54308	-0.332545	0.466533	0.817164	-0.69555	0.114148	0.242482	-1.07073	-0.693837	-0.355651	0.75318	0.15565	0.167072	-1.23236	-0.569992	-0.164199	1.05933	-1.46418	-0.769269	0.0808761	-0.0245813	-0.5347
Q7ZTS4	Q7ZTS4	krt18	157	49	83.7	712.55	DANRE	48630.1	Keratin, type I cytoskeletal 18	NA	0.258424	0.475376	0.602758	-0.925063	0.030186	0.144535	-0.283244	0.469029	0.817852	0.900244	0.0238924	0.0842144	0.771973	0.233165	0.702567	-0.395403	0.243342	0.486325	0.648533	0.0335255	0.83831	-0.161347	-1.56768	-0.260323	-0.152198	0.225529	-0.0928519
Q6NYL7	Q6NYL7|A8E5I2	krt18b	120	40	75.8	649.27	DANRE	44847.3	Keratin 18b	NA	0.0662068	0.799559	0.862822	-0.425995	0.146841	0.37008	-0.0322362	0.908778	0.981067	0.459965	0.0952625	0.215659	0.37975	0.58704	0.449164	-0.502036	-0.115534	0.447928	0.658978	-0.154234	0.563955	-0.200882	-0.44083	-0.170888	0.334804	0.00384452	0.36905
Q5XJ10	Q5XJ10|E9QIH5|E9QGA9	gapdh	695	28	85.2	706.2	DANRE	36011.6	Glyceraldehyde-3-phosphate dehydrogenase	SUBCELLULAR LOCATION: Cytoplasm, cytosol {ECO:0000250}. Nucleus {ECO:0000250}. Cytoplasm, cytoskeleton {ECO:0000250}.	1.16236	0.00179167	0.0142495	0.226459	0.491693	0.718914	0.312992	0.346003	0.731724	1.24889	0.00104047	0.0101151	0.720945	0.244599	0.65073	-1.12966	0.160443	-0.0870336	0.806974	0.616816	0.438186	-1.51208	1.00408	0.137024	-0.589728	0.378257	-0.0412752
Q5MJ86	Q5MJ86|F1R3D3	gapdh-2	117	22	73.4	438.05	DANRE	36449.1	Glyceraldehyde-3-phosphate dehydrogenase 2	SUBCELLULAR LOCATION: Cytoplasm {ECO:0000250|UniProtKB:Q64467}.	1.15145	0.00054431	0.00672908	0.342305	0.230755	0.475987	0.201771	0.471663	0.819307	1.01092	0.00151659	0.0131916	0.402697	0.4891	0.269081	-1.21543	0.091204	-0.394466	0.837632	0.0847737	0.22121	-0.887763	0.471969	0.657003	-1.09954	-0.170223	-0.342407
F1QZ09	F1QZ09	aclya	84	35	48.4	685.86	DANRE	120576	ATP-citrate synthase	NA	-0.221879	0.484991	0.611616	-0.0797718	0.814614	0.917327	0.103872	0.760303	0.940084	-0.0382353	0.903303	0.940996	-0.330727	-0.135847	-0.25337	-0.10152	0.387788	1.21722	-0.347061	0.163295	-0.167593	-0.181104	0.069104	-0.235767	0.405334	-0.0607285	0.495761
R4GEU0	R4GEU0|F1R515	aclyb	9	9	20.3	265.48	DANRE	122968	ATP-citrate synthase	NA	0.116961	0.342318	0.476929	-0.138353	0.300065	0.556674	0.0703003	0.592601	0.876055	0.325614	0.0168758	0.0672593	0.202468	-0.04144	0.39402	0.153814	0.153338	0.473215	0.112492	0.316626	0.100378	-0.062463	0.196674	-0.129632	-0.121865	0.189915	-0.101862
R4GDQ0	R4GDQ0	tpp2	72	47	38.7	684.29	DANRE	140615	Tripeptidyl-peptidase 2	NA	0.563534	4.10656e-05	0.00158115	0.439836	0.000743437	0.0144163	0.190803	0.0789671	0.381134	0.314501	0.0048532	0.028311	0.0999353	0.21149	0.0878328	-0.271073	0.340125	-0.244227	0.517081	0.235237	-0.0632172	-0.421317	0.372547	0.257287	-0.429213	0.172444	-0.256075
A0A2R8QAA8	A0A2R8QAA8|A0A0R4IT09|Q6P948|E7F9W7|F1QBT9|A0A2R8Q5C3|E9QBJ0	pdha1a	123	40	85.3	681.62	DANRE	46213	Pyruvate dehydrogenase E1 component subunit alpha	NA	0.717242	0.00136708	0.0119586	0.502967	0.0205311	0.1141	0.311257	0.126382	0.477376	0.525532	0.010757	0.049392	0.382152	0.118648	0.144576	-0.185812	0.611838	-0.196895	0.17606	0.363179	-0.143265	-0.573688	0.860927	0.209031	-0.79962	0.262547	-0.356442
A0A140LH97	A0A140LH97|A0A0R4IT72|A0A140LGD6|A0A0R4IEF2	itih3b.2	86	43	47.1	677.47	DANRE	102787	Zgc:112265 (Fragment)	NA	-0.0727351	0.695785	0.787272	0.442613	0.0424414	0.178226	0.368015	0.0839988	0.393881	-0.147332	0.432658	0.586466	0.162597	0.152583	0.357787	-0.111015	0.27818	-0.642602	0.567218	-0.104077	-0.0883587	-0.0177144	0.324508	-0.0153514	0.2624	0.0546582	0.245082
A0A0R4IU44	A0A0R4IU44	itih3b.1	16	15	20.4	232.19	DANRE	100404	Inter-alpha-trypsin inhibitor heavy chain 3b	NA	-0.22762	0.434512	0.566079	0.236044	0.452644	0.688631	0.296148	0.349135	0.733427	-0.167517	0.563013	0.695966	-0.192932	0.393865	0.350065	-0.221718	-0.0229846	-0.378315	0.892623	-0.286236	0.410365	-0.0928093	-0.019617	-0.110983	0.824156	-0.0478758	0.349621
A0A286YAP4	A0A286YAP4|Q7T3L3	hsp90b1	104	44	52.3	675.42	DANRE	94964.1	Heat shock protein 90, beta (grp94), member 1	NA	-0.455179	0.147135	0.264193	0.0537809	0.868587	0.94165	-0.141188	0.665048	0.903349	-0.650148	0.0464414	0.133432	-0.383038	0.190606	-0.378811	-0.259038	-0.357791	-0.4752	-0.118653	-0.225831	0.344725	-0.066141	-0.0314559	0.170224	0.846533	-0.247446	1.18691
F1QK93	F1QK93|A0A2R8Q718|F1QY43	psmd1	87	44	49	671.8	DANRE	107961	26S proteasome non-ATPase regulatory subunit 1	NA	0.947582	8.87278e-05	0.00235801	0.567903	0.00831376	0.0640553	0.00320091	0.986256	0.995993	0.382879	0.0411926	0.122745	0.0993204	0.431311	-0.0159103	-0.62101	0.164247	-0.466149	0.711624	0.395517	-0.153641	-0.838852	0.425554	0.539431	-0.507202	0.356172	-0.100834
F1QDA6	F1QDA6	acsl1b	86	36	61.9	663.46	DANRE	78660	Acyl-CoA synthetase long chain family member 1b	NA	0.579758	0.00610454	0.0303647	0.452381	0.0343232	0.154796	-0.0205155	0.916141	0.981906	0.106862	0.556256	0.689853	0.157679	0.176373	-0.258771	0.141036	0.30156	-0.133324	0.011114	0.226411	-0.529248	-0.231156	0.471722	0.323095	-0.549836	0.402045	-0.551154
B8JK22	B8JK22	acsl1a	16	12	22.6	180.9	DANRE	78407.2	Acyl-CoA synthetase long chain family member 1a	NA	0.461385	0.00957638	0.0407645	0.327652	0.0671244	0.236202	-0.19613	0.252839	0.656191	-0.0623971	0.68753	0.790647	0.0992051	0.128007	-0.114899	0.169821	0.0832475	-0.402925	0.0130669	0.39844	-0.484312	-0.0705336	0.209443	0.392915	-0.39108	0.272836	-0.36155
F1RAK0	F1RAK0|F8W5G0	acsl5	10	8	13.8	115.63	DANRE	76014.6	Acyl-CoA synthetase long chain family member 5	NA	-1.59633	0.10886	0.214673	-1.68891	0.115583	0.323857	-1.8007	0.0954817	0.418194	-1.70812	0.0884257	0.206294	-1.44775	1.80376	-0.398468	-0.177795	-2.3268	-2.77006	-2.42784	-2.97888	0.871	0.731946	-3.12104	-0.348438	0.909747	-1.77457	1.6233
Q1LVL2	Q1LVL2|A0A2R8RMW6|Q1LVL3|A0A286YAH8|F1QBG7|Q4V983	aars1	75	45	48.6	663.19	DANRE	107562	Alanine--tRNA ligase	NA	-0.412107	0.131903	0.244941	-0.199664	0.48334	0.713754	-0.183234	0.519409	0.845427	-0.395677	0.146647	0.287358	0.128046	0.00911322	-0.0461593	-0.0078338	-0.243926	-0.267022	-0.209835	0.0771879	0.103221	-0.0957292	-0.206667	-0.127064	1.40417	-0.106872	0.200191
F1QXV8	F1QXV8	pgk1	219	34	85.6	658.92	DANRE	45188.4	Phosphoglycerate kinase	NA	0.754373	0.00864119	0.0381838	-0.281482	0.304533	0.559886	-0.124794	0.643329	0.896111	0.91106	0.00253847	0.018589	0.701658	0.383895	0.831773	-0.763763	-0.080382	0.110611	0.436762	0.512394	0.470285	-0.905717	0.38492	0.278606	-0.158329	0.31268	0.297894
F1QPL7	F1QPL7|A0A2R8PV58|B0S5E2|B0S5E3	pcca	76	44	58.1	658.48	DANRE	79895.2	Propanoyl-CoA:carbon dioxide ligase subunit alpha (Fragment)	NA	0.449661	0.00214162	0.0158493	0.571993	0.000608472	0.0129474	0.139153	0.292758	0.68811	0.0168212	0.888315	0.931967	-0.0665037	0.127876	-0.058144	-0.176854	0.439432	-0.354353	0.123107	0.367025	-0.230585	-0.344433	0.62125	0.298149	-0.194043	0.228725	-0.0615407
Q5RGK8	Q5RGK8|Q7ZT42	snd1	71	47	55.4	657.91	DANRE	103276	Staphylococcal nuclease domain-containing protein	SUBCELLULAR LOCATION: Cytoplasm {ECO:0000256|ARBA:ARBA00004496, ECO:0000256|PIRNR:PIRNR017179}.	-0.369489	0.0601121	0.143051	-0.0640821	0.745932	0.884931	0.112458	0.571304	0.867834	-0.192948	0.301451	0.458393	0.0201431	0.0409972	0.0978881	-0.0838212	-0.00870925	0.0279624	0.0997149	-0.138017	0.348411	-0.0601257	0.0875514	0.0178493	0.802863	-0.132587	0.607282
B8JLR1	B8JLR1	pdcd6ip	67	46	48.4	654.23	DANRE	96283.2	Programmed cell death 6-interacting protein	NA	-0.168387	0.287804	0.422171	-0.218847	0.205294	0.445699	-0.148463	0.382031	0.759913	-0.098003	0.530015	0.66922	0.234611	0.261078	0.0607985	-0.0175569	0.0291675	0.165673	-0.182021	0.107901	0.283995	-0.0250347	0.0551189	0.0278401	0.467255	0.0667208	0.712426
Q7T334	Q7T334	mdh2	338	32	89.6	654.23	DANRE	35818.7	Malate dehydrogenase	NA	1.23791	7.3052e-05	0.00216493	0.870866	0.00256116	0.0319692	0.176293	0.463311	0.815509	0.543332	0.0259978	0.0899847	0.22822	0.325048	-0.000893913	-0.620679	0.487336	-0.816356	0.499884	0.608482	-0.322023	-1.15041	0.942089	0.435052	-0.897703	0.498657	-0.415595
Q9DGL6	Q9DGL6	atp1a1a.1	94	15	40.9	652.59	DANRE	114690	Sodium/potassium-transporting ATPase subunit alpha	SUBCELLULAR LOCATION: Membrane {ECO:0000256|RuleBase:RU362084}.	0.311803	0.136505	0.251077	0.236368	0.28534	0.53978	-0.824597	0.00191247	0.0510858	-0.749162	0.00219253	0.0168519	-0.444732	0.218435	-0.811746	0.339121	-0.267316	-0.56697	-0.314863	0.389947	-1.01401	0.369499	-0.836813	0.593694	-0.230103	0.204323	-0.31933
B8JKS7	B8JKS7	atp1a1a.4	19	13	40.5	620.43	DANRE	113913	Sodium/potassium-transporting ATPase subunit alpha	SUBCELLULAR LOCATION: Membrane {ECO:0000256|RuleBase:RU362084}.	-0.232449	0.534509	0.656001	-0.721374	0.089987	0.277853	-1.83835	0.000453012	0.0241428	-1.34942	0.00270577	0.0192562	-1.28989	0.127868	-0.742688	0.723208	-0.717785	-0.274901	-2.05914	0.143001	-1.41512	1.06201	-2.17914	0.386403	0.215599	0.0880216	-0.325727
A0A0R4IJ10	A0A0R4IJ10|B0R068	atp1a1b	14	10	38.6	576.7	DANRE	114377	Sodium/potassium-transporting ATPase subunit alpha	SUBCELLULAR LOCATION: Membrane {ECO:0000256|RuleBase:RU362084}.	0.154432	0.386806	0.51984	0.249892	0.202831	0.44289	-0.571822	0.00906239	0.123096	-0.667282	0.00197996	0.0157655	-0.345902	-0.0226584	-0.750121	0.42837	0.00957393	-0.236172	-0.415436	0.674972	-0.632425	0.175899	-0.317926	0.349675	-0.116857	0.320248	0.217093
B0S5Q5	B0S5Q5|A0A2R8Q8K8|A0A2R8Q7T9	atp1a2a	32	19	38.5	573.69	DANRE	113529	Sodium/potassium-transporting ATPase subunit alpha	SUBCELLULAR LOCATION: Membrane {ECO:0000256|RuleBase:RU362084}.	1.35706	7.61065e-05	0.00220931	0.45433	0.100582	0.296508	0.386217	0.156758	0.528809	1.28895	0.000122862	0.00246541	0.732401	0.0438258	-0.0586511	-0.568939	0.744223	0.129682	0.973183	0.573584	0.060988	-0.892429	0.2939	0.326994	-1.60005	0.192467	-1.22996
Q9DEU2	Q9DEU2|A0A0R4IK21	atp1a3b	5	4	35.7	495.31	DANRE	114070	Sodium/potassium-transporting ATPase subunit alpha	SUBCELLULAR LOCATION: Membrane {ECO:0000256|RuleBase:RU362084}.	0.173636	0.274366	0.408171	-0.302584	0.0886791	0.274994	0.0021705	0.989659	0.997048	0.478391	0.00785305	0.0393646	0.598721	-0.107812	0.328019	-0.128229	-0.0586098	0.0438383	0.233617	0.291777	0.378771	-0.166491	-0.0707481	0.0181262	-0.438003	-0.0717609	0.168508
Q6P271	Q6P271	atp1a3a	2	2	32.4	445.69	DANRE	113948	Sodium/potassium-transporting ATPase subunit alpha	SUBCELLULAR LOCATION: Membrane {ECO:0000256|RuleBase:RU362084}.	-1.07093	0.000426866	0.005898	-1.63464	1.70749e-05	0.00152282	-0.123341	0.624256	0.889718	0.440364	0.0753207	0.184334	0.356766	-0.606301	0.860639	0.821064	-0.325544	1.29442	-0.754872	-0.244743	1.42692	0.516726	-0.869439	-0.875308	0.540693	-0.380091	0.298809
B8JKT0	B8JKT0	atp1a1a.3	9	5	22.1	320.27	DANRE	114093	Sodium/potassium-transporting ATPase subunit alpha	SUBCELLULAR LOCATION: Membrane {ECO:0000256|RuleBase:RU362084}.	-0.0200951	0.878113	0.918218	-0.231867	0.118895	0.328694	-1.14675	1.73003e-06	0.00109718	-0.93498	6.74256e-06	0.000394495	-0.687116	0.393193	-0.76544	0.442894	-0.605722	-0.405701	-0.919352	0.374104	-0.458744	0.502187	-0.908276	0.494225	0.34727	0.0810155	0.130567
B8A565	B8A565	c9	96	37	59.4	650.92	DANRE	74423.8	Complement component C9	SUBCELLULAR LOCATION: Cell membrane {ECO:0000256|ARBA:ARBA00004651}; Multi-pass membrane protein {ECO:0000256|ARBA:ARBA00004651}. Membrane {ECO:0000256|ARBA:ARBA00004141}; Multi-pass membrane protein {ECO:0000256|ARBA:ARBA00004141}. Secreted {ECO:0000256|ARBA:ARBA00004613}. Target cell membrane {ECO:0000256|ARBA:ARBA00004276}; Multi-pass membrane protein {ECO:0000256|ARBA:ARBA00004276}.	0.288304	0.186006	0.309376	0.627195	0.0147935	0.0935252	0.947033	0.000978552	0.0340988	0.608141	0.011476	0.0515729	0.045776	-0.127516	0.29697	-0.704764	0.53767	0.534919	0.844465	-0.476913	-0.51609	-0.816225	0.770632	-0.156612	-0.201349	-0.156735	-0.348654
Q75U66	Q75U66|A0A0R4IS83|A0A0R4IPF4|A0A0R4INY2|A0A0R4IRR6|A0A0J9YJH5|A0A0R4IE42	Q75U66	100	34	50	649.25	DANRE	86511.2	Periostin	NA	0.261979	0.031346	0.0912331	-0.443347	0.00232217	0.0299286	-0.041343	0.729751	0.927188	0.663983	3.87454e-05	0.00119264	0.522046	0.0584926	0.479319	-0.142969	0.0496355	0.712041	0.390517	0.116	0.516184	0.0270869	-0.0980012	0.220528	-0.107092	0.226553	-0.203369
E7F5I3	E7F5I3|E9QIF5	postna	65	30	35	487.88	DANRE	97987.6	Periostin, osteoblast-specific factor a	SUBCELLULAR LOCATION: Secreted, extracellular space, extracellular matrix {ECO:0000256|ARBA:ARBA00004498}.	0.0337522	0.808621	0.869789	-0.19009	0.2201	0.463211	0.039915	0.790917	0.948383	0.263757	0.0757525	0.185176	0.488911	0.0646591	0.340452	-0.21343	-0.0170812	-0.187334	0.17502	0.106047	0.383504	0.149319	0.0409409	0.0188009	0.0464389	-0.0839943	-0.0118241
A0A0R4ID71	A0A0R4ID71	evplb	65	49	29.1	648.34	DANRE	193055	Envoplakin b	SUBCELLULAR LOCATION: Cytoplasm, cytoskeleton {ECO:0000256|ARBA:ARBA00004245}.	0.00275032	0.981922	0.985964	-0.804568	3.14094e-05	0.00207731	0.0386659	0.768437	0.941937	0.845984	8.65579e-06	0.000457386	0.961191	-0.165997	0.913735	-0.126329	0.0796888	0.50607	0.0938095	0.0405453	0.665576	-0.0186079	-0.302274	-0.122806	-0.114048	-0.0781069	-0.078381
F1QDL1	F1QDL1	col1a1b	178	37	24.2	647.12	DANRE	137882	Collagen, type I, alpha 1b	NA	1.04945	0.0113432	0.0455884	-0.773687	0.0652557	0.232203	-1.61991	0.00103156	0.0351729	0.203227	0.577201	0.707797	0.411249	0.0938852	-0.0483265	-0.695692	-1.14052	-0.201395	0.00822315	0.932138	-0.605314	0.183021	-1.52161	1.35166	-0.574733	0.563417	-0.169293
A0A0R4IMA3	A0A0R4IMA3|A0A0R4IHB0|Q2LDA1|B3DLK0	col2a1a	4	3	3.1	43.74	DANRE	138946	Collagen, type II, alpha 1a	NA	-0.00390491	0.989492	0.991211	-0.641544	0.0622355	0.225586	-1.64405	0.000169305	0.0160258	-1.00641	0.00430453	0.0261981	-0.329689	0.0207151	-0.807707	0.417088	-0.90371	0.0506604	-0.895763	0.441518	-1.12655	0.880431	-1.78513	0.964754	0.146197	0.369744	0.368635
E9QE31	E9QE31|F1R632|A0A2R8Q1U8	capn3b	80	38	57.1	646.05	DANRE	84085.2	Calpain 3b	NA	0.826706	0.000172645	0.00348249	0.403793	0.0347168	0.155825	0.286871	0.117562	0.463668	0.709785	0.000637357	0.00732153	0.565231	0.333596	0.293014	-0.428674	0.406342	0.0565434	0.716757	0.085112	-0.249191	-0.704621	0.587477	0.246021	-0.624269	0.468554	-0.415979
A0A0R4IC31	A0A0R4IC31|F2Z4T4|A0A2R8QBS2|A0A2R8Q9F2|A0A0A0MPJ0	akap12b	60	40	28.8	646	DANRE	172664	A kinase (PRKA) anchor protein 12b	SUBCELLULAR LOCATION: Membrane {ECO:0000256|ARBA:ARBA00004635}; Lipid-anchor {ECO:0000256|ARBA:ARBA00004635}.	0.384521	0.0144974	0.0538935	0.253499	0.108664	0.313222	0.162692	0.288772	0.685848	0.293713	0.0505143	0.141293	0.0937191	0.168825	0.198241	-0.356986	0.168919	-0.0958726	0.47399	-0.0567187	-0.190028	-0.147177	0.122133	0.38373	-0.444202	-0.126546	-0.220429
A0A2R8PXK4	A0A2R8PXK4	synm	84	4	40.8	644.73	DANRE	122477	Synemin, intermediate filament protein	NA	1.30953	2.88863e-06	0.000339253	0.946724	0.000157403	0.00570337	-0.1603	0.388061	0.76566	0.202506	0.244742	0.400079	-0.240086	0.628423	-0.390164	-0.794609	0.219412	-0.584777	0.766323	0.482125	-0.787894	-0.813946	0.352246	0.98685	-0.626243	0.327778	-0.578146
Q1LX72	Q1LX72	synm	5	5	40.9	637.57	DANRE	122420	Synemin, intermediate filament protein	NA	1.2128	0.0220031	0.071535	1.92504	0.00214541	0.0283418	0.559146	0.286552	0.682701	-0.153094	0.747563	0.831923	-0.0971769	0.163871	-1.88685	-0.668773	0.505108	-2.05873	1.10311	0.560466	-0.811484	-0.56205	0.526221	-0.790426	-0.994201	0.675424	-2.01685
O93409	O93409|A0A2R8QTL0|E9QJI5	mylpfa	1262	14	95.8	643.39	DANRE	18979.1	Mylz2 protein	NA	-0.643501	0.000984621	0.00964455	-1.12308	1.244e-05	0.00129315	0.179358	0.29333	0.688488	0.658937	0.000816614	0.00863025	1.249	-0.331542	1.077	0.279149	-0.187824	0.792786	-0.212917	-0.0601436	0.918993	0.10337	0.0598312	-0.58439	0.329493	-0.195904	0.690014
E9QG51	E9QG51	mylpfb	71	2	91.1	335.68	DANRE	15400.2	Myosin light chain, phosphorylatable, fast skeletal muscle b (Fragment)	NA	0.484048	0.181874	0.304939	-1.40639	0.00227545	0.0295063	-0.0329168	0.930553	0.983972	1.85752	0.000123982	0.00247139	1.69342	-0.0543679	1.42518	-0.826484	-1.0697	0.732676	0.240656	0.214758	1.35538	-0.960996	0.514865	0.00737433	-0.5964	-0.455008	0.160444
Q6TNT9	Q6TNT9|A0A2R8RLZ9	gdi2	112	30	72.9	638.46	DANRE	51042.5	Rab GDP dissociation inhibitor	SUBCELLULAR LOCATION: Cytoplasm {ECO:0000256|RuleBase:RU363124}.	0.336979	0.0103644	0.0429613	0.0327896	0.791187	0.907382	-0.196352	0.129797	0.485647	0.107838	0.354629	0.512229	0.271277	0.276712	0.166928	-0.112447	-0.0175645	-0.182722	0.237697	0.321617	0.00444052	-0.196603	0.0731789	0.327824	-0.0318785	0.250337	0.169502
A2AR68	A2AR68	gdi1	22	14	44	362.74	DANRE	50929.9	Rab GDP dissociation inhibitor	SUBCELLULAR LOCATION: Cytoplasm {ECO:0000256|RuleBase:RU363124}.	0.180617	0.0916149	0.190312	0.0652701	0.55244	0.767533	-0.186716	0.104842	0.441505	-0.0713689	0.484096	0.631783	-0.21555	0.213871	-0.0298999	0.015653	0.00367047	0.222929	0.0477387	0.158557	-0.220548	0.102083	-0.0379004	0.260738	-0.0373164	0.131711	-0.0380127
A0A0R4IGN3	A0A0R4IGN3|A0A0R4IBZ3	pdia3	96	34	71.2	637.56	DANRE	51534.2	Protein disulfide-isomerase (Fragment)	SUBCELLULAR LOCATION: Endoplasmic reticulum lumen {ECO:0000256|ARBA:ARBA00004319}.	-0.282395	0.292576	0.427244	0.107342	0.705636	0.863791	-0.165733	0.561305	0.862471	-0.55547	0.0504274	0.141112	-0.330088	0.336641	-0.208236	-0.285356	-0.27766	-0.434022	0.072401	-0.161022	0.128874	-0.116122	-0.10532	0.146658	0.833988	-0.0734508	0.945897
Q6NZU0	Q6NZU0|A0A2R8RIN4|A0A2R8QHY3|A0A2R8PXE6	hspa4b	66	34	57.3	634.47	DANRE	95643.8	Heat shock 70 kDa protein 4	SUBCELLULAR LOCATION: Cytoplasm {ECO:0000256|ARBA:ARBA00004496}.	0.0123133	0.892798	0.929589	0.0951874	0.343408	0.594472	-0.102434	0.30927	0.704083	-0.185308	0.0593759	0.156745	-0.049759	0.142448	-0.00339799	-0.0754074	0.0110428	-0.13973	-0.0132663	0.0334767	-0.164195	0.00912404	0.0199742	0.139566	0.135704	0.117915	0.314731
Q7ZU46	Q7ZU46|F8W5B2	hspa4a	50	31	50.5	578.61	DANRE	94141.2	Heat shock protein 4, like	NA	0.246412	0.0173683	0.0608228	0.0632571	0.527865	0.748812	-0.118532	0.24595	0.650195	0.0646229	0.486823	0.634	0.09795	0.0859259	-0.0018458	-0.0181732	-0.0733672	0.020471	0.185822	0.216554	-0.147635	-0.229614	0.0540214	0.196296	-0.0768237	0.197322	0.0350601
A0AUR2	A0AUR2	srl	129	3	68.6	633.55	DANRE	55367.5	Sarcalumenin	NA	1.42098	1.24964e-07	6.09631e-05	0.956423	2.134e-05	0.00175736	-0.0276246	0.853887	0.96582	0.436935	0.00694731	0.0363473	-0.118873	0.500762	-0.235254	-0.79284	0.383566	-0.603894	0.725296	0.566933	-0.683372	-0.937156	0.529361	0.753912	-0.961363	0.473188	-0.697775
A0A0R4IRI3	A0A0R4IRI3	srl	10	3	66.8	619.86	DANRE	54177.3	Sarcalumenin	NA	1.12357	0.000218137	0.00400993	0.529546	0.0451069	0.184669	0.124773	0.609837	0.883726	0.718794	0.00638027	0.0342568	0.22884	0.414897	0.207355	-0.951074	0.0592423	-0.413039	0.658719	0.444741	0.0631503	-1.01839	0.935408	0.632091	-0.590078	0.213673	-0.229322
A0A2R8RYX8	A0A2R8RYX8	wu:fb80c09	22	10	40.8	235.76	DANRE	44496.1	Dynamin-type G domain-containing protein	NA	0.856081	5.2665e-05	0.00183517	0.57479	0.00279288	0.0329789	0.20869	0.203749	0.598345	0.489981	0.00486822	0.0283535	-0.0361558	-0.0201913	-0.0504023	-0.398866	0.224266	0.0845711	0.53744	0.560655	-0.362463	-0.604116	0.689326	0.247949	-0.676285	0.311537	-0.645107
B8A5L6	B8A5L6	fga	112	8	56.8	632.77	DANRE	76031.8	Fibrinopeptide A	SUBCELLULAR LOCATION: Secreted {ECO:0000256|ARBA:ARBA00004613}.	0.19212	0.430192	0.562183	0.222209	0.399114	0.643965	0.227235	0.38884	0.76597	0.197147	0.418531	0.572366	0.237003	0.391775	0.485286	-0.365726	0.41012	-0.159946	-0.0308114	-0.301455	-0.189956	-0.556334	0.566608	0.18814	0.114665	0.073823	0.391196
E9QCD1	E9QCD1	E9QCD1	5	2	65.5	518.81	DANRE	50191.5	Fibrinopeptide A	NA	0.0712663	0.71665	0.801727	-0.0801914	0.705421	0.863694	0.341707	0.123816	0.474156	0.493165	0.0236169	0.0836926	0.200461	0.138524	0.534424	-0.325371	0.564554	0.550246	-0.206973	-0.462081	-0.149396	-0.282149	0.253645	-0.100163	-0.142596	-0.128138	-0.0868079
A5PMZ3	A5PMZ3	scinlb	122	40	59.1	632.63	DANRE	79978.9	Scinderin-like b	NA	-0.358127	0.210923	0.33737	-0.590718	0.0658429	0.23299	0.849208	0.0127851	0.144533	1.0818	0.00162047	0.0138719	1.32527	-0.424728	1.38444	-0.327514	0.22207	-0.0170722	0.755138	-0.686728	1.02245	-0.357158	0.0369552	-0.433104	-0.144723	-0.500055	0.217289
A0A140LGK1	A0A140LGK1|Q6P698	lcp1	82	32	65.5	632.23	DANRE	70314.2	Plastin-2	NA	0.216045	0.260218	0.392369	0.300232	0.153904	0.380025	0.395013	0.0678819	0.35029	0.310826	0.114272	0.242583	-0.00448949	0.304042	0.0914636	-0.536874	0.00739775	0.161556	0.660169	-0.220109	0.203919	-0.330629	0.572466	0.150867	-0.133936	-0.161476	0.210585
Q6DG81	Q6DG81	pls3	68	29	52.4	527.07	DANRE	70604.7	Plastin 3 (T isoform)	NA	0.198591	0.12685	0.238507	-0.238148	0.093367	0.283262	0.0366896	0.784491	0.946232	0.473429	0.00190301	0.0153135	0.575824	0.0546736	0.508026	-0.203164	0.0484118	0.203507	0.324922	0.109341	0.252606	-0.287755	0.0671926	0.179062	-0.0439004	0.0975341	0.181068
F1QCE2	F1QCE2|A5PM88	pls1	12	11	19.2	154.7	DANRE	75750.6	Plastin 1 (I isoform)	NA	-1.06587	0.0209933	0.069418	0.445557	0.327558	0.580019	-0.565021	0.219571	0.616294	-2.07645	0.000204884	0.00341887	-1.40852	-1.09406	-1.49004	0.880652	-0.691422	-1.69199	-1.85522	-0.627198	-1.72031	1.60217	-0.849829	-0.334322	0.154912	-0.212974	-0.642784
Q6NSN5	Q6NSN5	adss1	118	32	74.3	631.76	DANRE	50829.2	Adenylosuccinate synthetase isozyme 1	SUBCELLULAR LOCATION: Cytoplasm {ECO:0000255|HAMAP-Rule:MF_03126}.	0.632442	0.000504235	0.0064473	0.183658	0.237028	0.484056	-0.0548576	0.717038	0.925222	0.393926	0.013213	0.0565343	0.277367	0.189818	0.233325	-0.123679	0.232091	0.139309	0.179699	0.559751	-0.180964	-0.418157	0.490962	0.150798	-0.384713	0.522732	-0.180119
Q568F6	Q568F6	adss2	61	22	58	439.13	DANRE	50118	Adenylosuccinate synthetase isozyme 2	SUBCELLULAR LOCATION: Cytoplasm {ECO:0000255|HAMAP-Rule:MF_03127}. Mitochondrion {ECO:0000250|UniProtKB:A4Z6H1}.	0.399295	0.090938	0.189153	0.28051	0.256055	0.50723	0.15412	0.525168	0.847485	0.272905	0.233889	0.388684	0.225514	-0.068694	0.15565	0.0260112	0.471171	0.339164	-0.0239509	0.622043	-0.415429	-0.305932	0.622986	-0.205065	-0.320291	0.462174	-0.18651
F1Q9U6	F1Q9U6	adssl	11	10	36.1	154.6	DANRE	51645.8	Adenylosuccinate synthetase	SUBCELLULAR LOCATION: Cytoplasm {ECO:0000256|HAMAP-Rule:MF_03125}.	-0.338032	0.00880375	0.0385819	-0.0835898	0.492451	0.7195	0.241532	0.062329	0.336418	-0.0129108	0.907986	0.94392	0.0967944	-0.190189	0.159247	0.045775	-0.0786593	-0.0224517	-0.255262	-0.406302	0.0532091	0.0738973	0.298252	-0.217438	0.0794323	-0.199758	0.139338
F1QSY7	F1QSY7	iars1	73	46	38.8	628.41	DANRE	146498	Isoleucyl-tRNA synthetase	NA	0.214601	0.140608	0.25632	0.0786049	0.603385	0.803558	-0.369777	0.0265391	0.219155	-0.233781	0.11115	0.237468	-0.252157	0.408433	-0.10894	-0.131736	-0.135363	-0.150021	0.094024	0.433953	0.135797	-0.0901401	-0.00433727	0.311173	0.440532	0.264648	0.341147
B5DE31	B5DE31	ybx1	105	36	77	628.13	DANRE	35011.5	Y-box-binding protein 1	SUBCELLULAR LOCATION: Cytoplasm {ECO:0000250|UniProtKB:P67809}. Nucleus {ECO:0000250|UniProtKB:P67809}. Cytoplasmic granule {ECO:0000250|UniProtKB:P67809}. Secreted {ECO:0000250|UniProtKB:P67809}. Secreted, extracellular exosome {ECO:0000250|UniProtKB:P67809}.	-0.184766	0.738312	0.818311	0.341531	0.569162	0.780632	-0.383814	0.523031	0.847268	-0.910111	0.116812	0.24601	-0.423395	-0.0975642	-0.610196	-0.839698	-0.564014	-1.45058	0.123985	0.0808581	0.0540838	-0.927397	-0.357944	0.582985	1.35965	-0.0949881	1.6178
F1QRM9	F1QRM9	npepps	93	42	46.2	626.97	DANRE	104771	Aminopeptidase	NA	0.357266	0.00223179	0.0161575	-0.0119783	0.907749	0.961484	0.0506057	0.626009	0.889718	0.41985	0.000648808	0.00741278	0.441943	0.204611	0.364643	-0.170097	0.204186	0.107214	0.264658	0.246741	0.141772	-0.262569	0.2869	0.228613	-0.194122	0.12527	0.00295907
F1RCC9	F1RCC9|A0A140LH61	synpo2la	75	40	43.7	626.79	DANRE	128010	Synaptopodin 2-like a	NA	1.31143	3.46863e-07	9.16587e-05	0.773816	0.000174561	0.0060486	-0.0109874	0.942096	0.986981	0.526629	0.00212063	0.0164993	-0.111836	0.458432	-0.182511	-0.7031	0.243072	-0.370008	0.884724	0.725442	-0.298887	-0.984799	0.471221	0.434406	-0.796199	0.557692	-0.585661
U3JAM7	U3JAM7|F1R899|A0A2R8RTS6	synpo2lb	24	16	20.9	277.68	DANRE	127643	Synaptopodin 2-like b	NA	1.20048	2.64269e-05	0.00121067	1.00803	0.000277227	0.00788296	-0.0355535	0.864116	0.970334	0.156891	0.420513	0.574628	-0.207771	0.540504	-0.345393	-0.7452	0.0593719	-0.619982	0.932226	0.766747	-0.622364	-0.871227	0.685864	0.630931	-0.567346	0.440649	-0.239301
Q6IQJ2	Q6IQJ2|A0A2R8Q8X0|A0A2R8QCY8|A0A0R4IXL7	Q6IQJ2	246	3	75.2	620.42	DANRE	50256.5	Tubulin beta chain	SUBCELLULAR LOCATION: Cytoplasm, cytoskeleton {ECO:0000256|ARBA:ARBA00004245}.	0.185949	0.16336	0.284154	0.0501725	0.717853	0.870013	-0.111289	0.427537	0.791199	0.0244871	0.84865	0.904418	-0.0417118	0.290803	0.0632624	-0.109104	0.0561494	0.158743	0.183784	0.0914892	0.0170208	-0.274254	0.0585706	0.242449	0.0735855	0.218421	0.409139
A0A0R4IPH2	A0A0R4IPH2	tubb2b	14	3	75.2	580.85	DANRE	50244.5	Tubulin beta chain	SUBCELLULAR LOCATION: Cytoplasm, cytoskeleton {ECO:0000256|ARBA:ARBA00004245}.	-0.278663	0.239838	0.369726	-0.114973	0.645652	0.831	0.391184	0.133504	0.494267	0.227494	0.332883	0.490544	0.482969	0.0240652	0.390859	-0.224199	0.164981	0.374869	0.29299	-0.0581173	0.368194	-0.274326	0.40978	-0.201932	0.146208	-0.171752	1.05923
F1QKY8	F1QKY8	tubb2	14	6	67.2	516.27	DANRE	50905.2	Tubulin beta chain	SUBCELLULAR LOCATION: Cytoplasm, cytoskeleton {ECO:0000256|ARBA:ARBA00004245}.	0.152284	0.209113	0.335236	-0.0321539	0.8001	0.911341	-0.170873	0.193036	0.586119	0.013565	0.908045	0.94392	-0.0865158	0.102212	0.162741	0.0946088	0.16788	0.147819	-0.0569479	0.443708	0.266449	-0.122997	0.160476	0.290607	0.231543	0.208841	0.233078
Q6PE34	Q6PE34	Q6PE34	20	6	64.8	460.8	DANRE	50090.4	Tubulin beta chain	SUBCELLULAR LOCATION: Cytoplasm, cytoskeleton {ECO:0000256|ARBA:ARBA00004245}.	0.453231	0.00230997	0.0162777	0.404149	0.00812691	0.0630755	0.543295	0.00106238	0.0358384	0.592376	0.000276181	0.00421474	-0.0102484	-0.287376	0.119892	-0.372668	0.593941	0.297257	0.442295	0.157109	0.114249	-0.476337	0.567073	0.258297	-0.510819	-0.163463	-0.488531
E7FC32	E7FC32	tubb1	19	11	43.3	263.68	DANRE	52976.7	Tubulin beta chain	SUBCELLULAR LOCATION: Cytoplasm, cytoskeleton {ECO:0000256|ARBA:ARBA00004245}.	-0.680659	0.0117475	0.0468276	-0.30096	0.251225	0.500792	-0.302353	0.249152	0.65194	-0.682052	0.0116136	0.0519335	-0.470415	-0.166815	0.124816	0.659159	-0.153815	0.336759	-0.688037	-0.0508521	-0.23629	0.705769	-0.244876	-0.280866	1.08369	0.258972	0.0344597
Q7ZUW8	Q7ZUW8|F1QMC6	got1	147	36	89.5	619.16	DANRE	46266.9	Aspartate aminotransferase	NA	0.6233	0.00227663	0.0162229	-0.175855	0.339651	0.592578	0.365472	0.0601863	0.330764	1.16463	8.81466e-06	0.0004597	0.760593	-0.136209	0.650572	-0.338404	0.473459	0.80067	0.193893	0.37425	0.391119	-0.756767	0.7573	0.00445016	-0.698036	0.195156	-0.262346
X1WE42	X1WE42|X1WDU8|X1WGD8|X1WFV5|X1WC52	nid2a	65	37	28.9	617.59	DANRE	178277	Nidogen 2a (osteonidogen)	SUBCELLULAR LOCATION: Membrane {ECO:0000256|ARBA:ARBA00004370}. Secreted, extracellular space, extracellular matrix, basement membrane {ECO:0000256|ARBA:ARBA00004302}.	0.573728	0.000237194	0.00411007	0.61733	0.000245299	0.00736517	0.416437	0.0049605	0.0871454	0.372836	0.00613935	0.0332732	0.240633	0.128023	-0.0176159	-0.597142	0.436094	-0.241535	0.666314	0.105501	-0.240445	-0.408593	0.55536	0.249181	-0.366898	0.0619023	-0.377673
F1RDU8	F1RDU8|F1QJS8	si:dkey-65b12.6	49	13	17.3	617.51	DANRE	316070	Si:dkey-65b12.6	NA	0.0127931	0.96936	0.978618	-0.521672	0.163386	0.391102	0.514676	0.168683	0.549737	1.04914	0.00692381	0.0363231	0.864599	-0.690291	0.278569	-0.238591	0.363323	0.951604	0.349035	-0.654233	-0.381094	-0.574229	-0.992114	-0.537651	-0.718154	-0.549535	-0.951907
A0A2R8RKZ9	A0A2R8RKZ9|F1R3I9	A0A2R8RKZ9	2	2	19.6	438.35	DANRE	208135	Uncharacterized protein	NA	-0.447965	0.0751609	0.166295	-0.702746	0.0148455	0.0936187	0.429142	0.109918	0.449163	0.683924	0.0112806	0.0509475	0.752275	-0.370467	0.584083	0.338933	0.0323494	1.19903	0.453702	-0.402657	0.28966	0.289419	-0.475505	-0.510911	-0.100127	-0.418473	-0.438874
F1R526	F1R526	F1R526	2	2	27.7	191.49	DANRE	68708.9	Si:dkey-65b12.6 (Fragment)	NA	0.104934	0.685431	0.779032	-0.43899	0.132844	0.3504	0.409516	0.15855	0.531266	0.953441	0.00241709	0.0179892	0.822629	-0.265062	0.39977	-0.176051	0.539958	1.09659	0.246248	-0.371766	-0.156703	-0.524189	-0.481466	-0.227467	-0.410867	-0.367449	-0.540374
Q6PHI8	Q6PHI8	tktb	93	35	63.2	614.5	DANRE	68693.1	Tkt protein	NA	-0.606663	0.0134686	0.0514876	-0.154665	0.511077	0.735028	-0.00317995	0.989125	0.996934	-0.455178	0.0513745	0.14288	-0.189525	-0.0977983	-0.319673	0.16855	0.096917	0.446612	-0.235743	-0.0575725	0.222883	0.0561352	-0.204946	-0.149043	0.811213	-0.141228	0.94511
A2BGR9	A2BGR9	aldh2.1	95	10	77.3	613.39	DANRE	57223.2	Aldehyde dehydrogenase 2 family member, tandem duplicate 1	NA	0.0408315	0.745128	0.822559	0.194645	0.166758	0.395738	-0.347958	0.0213716	0.196149	-0.501771	0.00133525	0.0120097	-0.383753	0.27291	-0.185223	-0.0710011	-0.105227	-0.306773	-0.048249	0.208878	-0.323506	0.0529512	-0.162031	0.296212	0.221921	0.193157	0.603959
F1QZU7	F1QZU7|A0A0G2KZR6	aldh2.2	31	10	61.8	593.46	DANRE	57247.3	Aldehyde dehydrogenase 2 family member, tandem duplicate 2	NA	-0.563634	0.00149438	0.0126001	0.0883668	0.569534	0.780632	-0.560844	0.00270975	0.0611575	-1.21284	1.04528e-06	0.000135268	-0.64047	0.132406	-0.761832	0.169721	-0.410487	-0.551092	-0.479695	-0.0840953	-0.533058	0.564021	-0.709557	-0.0428766	0.899501	0.104957	0.731686
Q6YBS2	Q6YBS2|B8JMD0	cap1	102	36	67.6	612.95	DANRE	49737.7	Adenylyl cyclase-associated protein	SUBCELLULAR LOCATION: Cell membrane {ECO:0000256|ARBA:ARBA00004202}; Peripheral membrane protein {ECO:0000256|ARBA:ARBA00004202}.	0.0916471	0.741191	0.819925	0.108537	0.717375	0.870013	0.18483	0.539641	0.853549	0.16794	0.54709	0.682222	0.33378	0.383919	0.248336	-0.558359	-0.0249203	-0.204438	0.565976	-0.130348	0.323509	-0.480871	0.310446	0.244095	0.296183	-0.101652	0.772472
F1Q6P3	F1Q6P3	col6a1	72	38	36.4	610.56	DANRE	108660	Collagen, type VI, alpha 1	NA	0.2246	0.576773	0.693702	0.0956538	0.824915	0.922863	-0.112682	0.794469	0.950275	0.0162637	0.967561	0.980956	0.947444	0.217221	-0.030602	-0.24326	-0.370959	-0.24295	0.993241	-0.139124	-1.04794	0.149896	-0.615855	0.454019	-0.210391	-0.0728185	-0.135345
A0A0G2L009	A0A0G2L009	dync1h1	62	48	27.2	606.05	DANRE	204590	Dynein, cytoplasmic 1, heavy chain 1	NA	0.25085	0.0570025	0.137456	-0.0644617	0.627217	0.818014	-0.001927	0.988362	0.996934	0.313385	0.0216955	0.079705	0.220893	0.238334	0.2875	-0.254857	0.0925177	0.104911	0.330292	0.0456406	0.247263	-0.232313	0.0292304	0.362328	-0.0599672	-0.035874	0.154164
Q6P0G6	Q6P0G6	myl1	759	25	94.7	604.69	DANRE	20988.5	Myosin, light chain 1, alkali	NA	0.014756	0.93507	0.957258	-0.582316	0.00970638	0.071651	-0.13188	0.504051	0.835312	0.465192	0.0214333	0.0790167	0.95123	0.109087	0.736833	0.131417	-0.20864	0.034742	0.0463084	0.332613	0.673661	-0.0483135	0.212732	-0.0189484	0.0800138	0.171968	0.37258
Q9I8U7	Q9I8U7	mylz3	585	5	96	463.85	DANRE	16767.6	Fast skeletal muscle myosin light polypeptide 3	NA	-1.14834	2.10047e-05	0.00103265	-1.2584	1.81624e-05	0.00155632	0.356723	0.0839112	0.393881	0.466782	0.0202691	0.0762768	0.777271	-0.695234	1.08416	0.715632	-0.185102	1.2314	-0.583847	-0.294042	0.972201	0.441117	0.0425346	-1.03461	0.466056	-0.37156	0.5751
B8JKH7	B8JKH7|B8JKH6	mylz3	4	2	79.5	331.75	DANRE	13757.4	Myosin, light polypeptide 3, skeletal muscle (Fragment)	NA	-1.23878	9.53518e-06	0.000726929	-1.6659	9.05623e-07	0.000308323	0.176879	0.369168	0.749204	0.603995	0.0045403	0.0272503	1.30374	-0.83062	0.918932	1.0289	-0.673448	1.22458	-0.433854	-0.680143	1.15267	0.668398	-0.440441	-0.695169	0.0062635	-0.565242	0.480384
Q7ZUB0	Q7ZUB0	myl13	131	14	71.5	333.19	DANRE	21055.6	Atrial myosin light chain	NA	0.575867	0.0112916	0.0454674	0.0423675	0.843574	0.93044	0.120692	0.576149	0.869682	0.654192	0.00523571	0.0297755	0.650662	0.418306	0.736795	-0.208284	0.122499	-0.100203	0.620192	0.092781	0.197268	-0.488878	0.497804	0.527452	-0.425384	0.132685	-0.0096989
E9QG86	E9QG86|A0A2R8QGT1|E9QF73|A0A0R4IXM2|A0A2R8Q1L3|E9QIL0	E9QG86	9	3	96	226.08	DANRE	17046.9	Zgc:153867	NA	0.0281606	0.880383	0.920136	-0.314801	0.136471	0.355385	-0.089889	0.657652	0.898513	0.253073	0.191316	0.342211	0.55414	0.380225	0.351088	-0.264092	-0.0936893	0.347953	0.177382	0.074058	0.175911	-0.0233525	0.0437219	-0.0415107	-0.0283205	0.11667	0.732565
E9QB41	E9QB41|A0A2R8QJ29|F1QWU4|A0A2R8RYI8|A0A2R8QAG2|E9QC87	myl6	8	5	88	189.26	DANRE	17128.1	Myosin, light chain 6, alkali, smooth muscle and non-muscle	NA	-1.30882	2.77256e-06	0.000331765	-0.273506	0.150047	0.374144	-0.111435	0.543675	0.855156	-1.14675	1.11669e-05	0.000544685	-0.644436	-0.177242	-0.206205	0.792184	-0.22018	-0.118788	-0.7	-0.59472	-0.209522	1.05363	-0.784552	-0.741534	0.789908	-0.313738	0.772341
A0A0R4ITP1	A0A0R4ITP1|A0A2R8QCN4	A0A0R4ITP1	9	5	38.4	102.88	DANRE	23015.3	Zgc:163073	NA	1.08213	0.00108706	0.0103205	0.625916	0.0430602	0.179592	-0.0824959	0.772018	0.942392	0.373721	0.17163	0.318033	0.162126	0.527299	0.00842789	-0.975048	-0.0343393	-0.794961	0.612046	0.370973	-0.105758	-0.892986	0.752418	0.792973	-0.322296	0.412238	-0.0347192
F1Q6V0	F1Q6V0|B0R0F7	myl4	3	2	26.2	78.15	DANRE	21073.8	Myosin, light chain 4, alkali	NA	0.90003	0.00293882	0.0190233	0.985934	0.00266368	0.0327149	0.127061	0.640271	0.895053	0.0411575	0.869624	0.919507	-0.51899	0.529849	-0.186544	-0.557436	0.36952	-0.327667	0.737828	0.202824	-0.288299	-1.13378	0.859327	0.81795	0.0350931	0.563368	0.169997
Q6PHG2	Q6PHG2	hpx	177	31	63.7	604.51	DANRE	51653.3	Hemopexin	SUBCELLULAR LOCATION: Secreted {ECO:0000250|UniProtKB:P20058}.	0.49676	0.587521	0.701811	0.857194	0.390446	0.636536	0.302073	0.759136	0.939953	-0.0583614	0.948889	0.969305	-0.803727	-1.74199	-0.95913	0.411531	1.20439	0.187797	-2.27858	0.867208	-1.92186	0.441288	1.02308	-0.808281	-2.16405	0.406628	-1.95224
F1QC84	F1QC84	f13a1a.1	94	36	50.2	601.68	DANRE	81572.9	Coagulation factor XIII, A1 polypeptide a, tandem duplicate 1	NA	0.0819907	0.944106	0.962624	-1.27585	0.322055	0.576066	-0.975872	0.44512	0.80322	0.381968	0.744461	0.829927	0.526587	1.59317	0.315746	-2.00135	-2.01776	-1.78087	0.690766	-2.59581	1.08952	-1.95618	-2.38731	1.29176	1.11973	-1.33803	1.46091
F1QUV7	F1QUV7	gars1	78	39	51.7	598.18	DANRE	78980.6	Diadenosine tetraphosphate synthetase	NA	-0.0826557	0.408255	0.540759	-0.296214	0.0141829	0.0908627	-0.0141346	0.894427	0.97704	0.199423	0.0600129	0.157901	0.349053	-0.0308678	0.460615	0.0821525	-0.0389851	0.260576	0.0222793	0.196637	0.289735	-0.0473611	0.148049	0.00864684	0.211527	0.0572476	0.315968
A8DZE4	A8DZE4	gpib	136	29	63.8	597.64	DANRE	62274	Glucose-6-phosphate isomerase	NA	0.591438	0.0364624	0.101423	-0.033935	0.90319	0.960366	0.472095	0.108385	0.447222	1.09747	0.000839034	0.00876494	0.416284	0.0433383	0.58809	-0.466869	0.428984	0.650288	0.534211	0.508004	0.384005	-0.306002	0.464	-0.90356	-0.558293	0.366764	-1.02004
F1QZL6	F1QZL6	gpia	49	21	50	400.58	DANRE	62140.6	Glucose-6-phosphate isomerase	NA	-0.481275	0.00208305	0.0155762	-0.114551	0.412471	0.656659	0.208501	0.147435	0.510565	-0.158222	0.228808	0.383828	-0.126506	-0.0721807	0.0138762	0.117096	0.170949	0.292617	-0.0477353	-0.232971	0.37448	0.18346	-0.0510163	-0.244341	0.401396	-0.188249	0.485406
Q6NYE1	Q6NYE1	fgb	93	38	75.4	596.45	DANRE	55205.3	Fibrinogen beta chain	SUBCELLULAR LOCATION: Secreted {ECO:0000256|ARBA:ARBA00004613}.	0.0950186	0.693149	0.785711	0.247847	0.347756	0.598242	0.185156	0.479614	0.824152	0.0323279	0.892911	0.934525	0.212288	0.359352	0.355897	-0.246603	0.355974	-0.140118	-0.181806	-0.41482	-0.508529	-0.345491	0.509027	0.0873347	0.0313751	0.138434	0.350945
F1QQW9	F1QQW9	si:dkey-37o8.1	77	29	64.3	594.97	DANRE	53975.7	Elongation factor 1-alpha (Fragment)	NA	-2.4126	0.0981641	0.19974	-1.21667	0.42021	0.662437	-1.12948	0.453479	0.808024	-2.32541	0.109622	0.235049	-2.88278	-3.07131	-2.88933	-2.72994	-3.19226	-2.54848	-3.31151	-2.98238	-0.423824	-2.52506	-3.70455	0.638093	2.61766	-3.67759	3.19457
Q92005	Q92005	eef1a	23	3	64.5	590.69	DANRE	50332	Elongation factor 1-alpha	SUBCELLULAR LOCATION: Cytoplasm.	-0.0844288	0.770957	0.84184	-0.255364	0.420278	0.662437	0.0977373	0.75509	0.937323	0.268672	0.361519	0.51907	0.483907	0.12309	0.474818	-0.432002	-0.0678014	-0.0752031	0.255611	-0.0226449	0.748659	-0.490759	0.270235	0.109123	0.543697	0.0102084	0.936556
A0A0R4IE10	A0A0R4IE10	eef1a1l2	26	7	55.6	560.32	DANRE	50418.2	Elongation factor 1-alpha	NA	1.06407	0.0123312	0.0483689	0.737437	0.0849204	0.269978	-0.45481	0.270524	0.670038	-0.12818	0.731611	0.82269	0.323503	0.535586	0.0947048	-0.124373	0.025028	-1.85246	0.600548	0.750804	-0.678421	-0.517605	0.00223491	0.645764	-0.679468	0.724167	-0.278502
Q6P969	Q6P969|E9QGR4|A0A2R8PXT7	eef1a1a	4	2	46.7	332.44	DANRE	50623.3	Elongation factor 1-alpha	NA	0.87568	0.0111355	0.0450965	0.110288	0.735279	0.879534	0.00497792	0.987796	0.996754	0.77037	0.0219262	0.0802737	0.818015	0.411944	0.511783	-0.833917	-0.0218016	-0.422777	0.885651	0.474535	0.375322	-0.992863	0.428771	0.483005	-0.0331108	0.334098	0.0607523
F1QJC9	F1QJC9|F1QSC5|A0A2R8QL73	col1a1a	222	41	27.2	594.3	DANRE	137950	Collagen, type I, alpha 1a	NA	1.05672	0.0379621	0.103819	0.160168	0.750665	0.887353	-1.30934	0.0200633	0.189366	-0.412785	0.382784	0.538905	0.0389267	0.03871	-0.596544	-0.696977	-0.337111	-0.64814	-0.271438	0.682388	-2.18874	0.10094	-1.45682	1.44561	-0.859682	0.316816	-0.287644
Q7ZVB2	Q7ZVB2|B0S7W3	aldh9a1a	125	9	75.1	593.7	DANRE	56116.7	4-trimethylaminobutyraldehyde dehydrogenase A	SUBCELLULAR LOCATION: Cytoplasm, cytosol {ECO:0000250|UniProtKB:Q9JLJ3}.	0.432501	0.228633	0.3582	-0.231951	0.541186	0.757633	0.54937	0.161254	0.53543	1.21382	0.00364565	0.0235952	0.282121	-0.0942894	0.504782	-0.896805	-0.25708	1.00979	1.57955	-0.447092	0.578197	-0.875642	-0.237157	-0.0230161	-0.436039	-0.185994	-0.271908
B0S7W5	B0S7W5|A0A2R8Q3R8	B0S7W5	3	3	50.3	374.64	DANRE	56080.8	Aldehyde dehydrogenase 9 family, member A1a, tandem duplicate 2	NA	-1.17845	0.168568	0.289717	-1.22669	0.183413	0.420421	0.503196	0.574004	0.869229	0.551436	0.506856	0.650186	-0.494413	0.211356	0.918133	1.0134	0.683025	1.68507	-1.40955	-1.63443	-0.885888	0.207573	-2.03636	-2.61903	-0.486847	-1.65453	-1.71697
Q802W2	Q802W2|A2AWD5	aldh9a1b	11	9	22	166.47	DANRE	57235.7	4-trimethylaminobutyraldehyde dehydrogenase B	SUBCELLULAR LOCATION: Cytoplasm, cytosol {ECO:0000250|UniProtKB:Q9JLJ3}.	0.738046	0.00743605	0.034764	0.841719	0.00529816	0.0482331	-0.54004	0.0511926	0.304004	-0.643713	0.0161352	0.065419	-0.555257	0.340936	-0.820372	-0.519835	-0.360933	-1.04847	0.36325	0.601248	-0.693429	-0.350486	0.184694	1.17121	0.0767562	0.296113	0.25089
Q6NYQ7	Q6NYQ7	nnt	77	33	37.3	566.67	DANRE	113524	Proton-translocating NAD(P)(+) transhydrogenase	NA	0.570221	0.00147176	0.0125456	0.636905	0.00114029	0.0184926	-0.628293	0.00126583	0.0402569	-0.694976	0.000296993	0.00440008	-0.387058	0.323978	-0.865007	0.214796	-0.0692938	-0.771269	-0.210415	0.535336	-1.02604	-0.0258273	-0.0966078	0.644469	-0.236671	0.507632	-0.221768
E9QDE7	E9QDE7|A0A2R8Q9E6|A0A2R8Q5X4|E9QEC6	nnt2	99	31	45.5	592.64	DANRE	84322.3	Proton-translocating NAD(P)(+) transhydrogenase (Fragment)	NA	0.597553	0.00894387	0.0389842	0.462579	0.0462676	0.188549	-0.403075	0.0770828	0.376881	-0.2681	0.190869	0.341604	0.167099	0.476504	-0.459876	0.387118	0.0168363	-0.763212	0.214605	0.495452	-0.399016	-0.116055	0.0650422	0.434845	-0.473419	0.600809	-0.180249
E7FCV8	E7FCV8	col6a2	76	40	37.1	584.3	DANRE	108109	Collagen, type VI, alpha 2	NA	0.489214	0.232989	0.362694	0.35787	0.412083	0.656589	0.0188989	0.964977	0.991363	0.150243	0.706936	0.805224	0.918455	0.163339	-0.0897313	-0.36222	-0.191803	-0.434445	1.09815	-0.0760733	-1.12144	-0.12779	-0.378112	0.596152	-0.485914	-0.0546953	-0.35221
E7FD66	E7FD66|F8W3V5	aass	61	36	44.1	580.36	DANRE	105166	Lysine ketoglutarate reductase	NA	0.652236	0.000495239	0.00638889	0.351909	0.0382361	0.166636	-0.108383	0.489592	0.827984	0.191944	0.197039	0.349138	0.278494	0.36472	0.175503	-0.26856	0.224434	-0.4589	0.277903	0.40991	-0.124298	-0.361008	0.45649	0.484879	-0.207607	0.452457	-0.0598024
B8A4B0	B8A4B0|P00366	glud1a	92	17	66.7	561.57	DANRE	60539.8	Glutamate dehydrogenase (NAD(P)(+))	NA	0.287528	0.0763231	0.167953	0.384252	0.0332322	0.152015	-0.17523	0.296715	0.69208	-0.271953	0.0916319	0.210686	0.0384006	0.172535	-0.192394	0.070376	0.0964423	-0.562947	-0.0109282	0.196904	-0.649118	0.176749	0.0426966	0.244131	-0.275236	0.258298	-0.250134
Q6P3L9	Q6P3L9	glud1b	71	15	62.3	580.16	DANRE	60375.6	Glutamate dehydrogenase (NAD(P)(+))	NA	-0.162495	0.326396	0.461848	0.269007	0.142172	0.364226	-0.232236	0.200314	0.595982	-0.663739	0.00113795	0.010784	-0.0950036	-0.059079	-0.44472	0.358797	-0.16058	-0.639326	-0.255789	0.0592402	-0.713135	0.546754	-0.195749	0.0447738	0.026775	0.0678533	-0.169557
X1WBX1	X1WBX1	prr33	74	40	49.6	576.14	DANRE	98548.4	Proline-rich 33	NA	0.759782	0.000278047	0.00456832	0.252367	0.152341	0.377488	-0.17166	0.319734	0.71419	0.335755	0.0479216	0.136058	0.295679	0.257059	0.141768	-0.357285	-0.0391576	-0.201807	0.569131	0.630732	-0.146956	-0.452015	0.293641	0.545055	-0.345888	0.351947	-0.0991495
Q803P2	Q803P2|Q9W792	tcp1	81	34	62.5	571.87	DANRE	60773.9	CCT-alpha	NA	0.26445	0.196025	0.319751	0.023852	0.911076	0.962855	-0.387034	0.0877694	0.403805	-0.146436	0.463698	0.614931	-0.0440834	0.417665	-0.00260985	-0.204055	-0.270577	-0.285638	0.164747	0.408457	0.201228	-0.347323	0.0790579	0.377804	0.406008	0.308512	0.600009
Q7ZVG7	Q7ZVG7|A0A0R4IJF0	fgg	91	34	70.7	571.44	DANRE	49402.2	Fgg protein	SUBCELLULAR LOCATION: Secreted {ECO:0000256|ARBA:ARBA00004613}.	0.19336	0.334134	0.468926	0.0919124	0.666079	0.841323	0.267193	0.221883	0.619486	0.36864	0.0783073	0.189811	0.304195	0.325916	0.52049	-0.302922	0.474831	0.114088	-0.0411123	-0.280182	0.0555064	-0.453347	0.587728	0.0981959	0.022005	0.149229	0.253984
A0A0R4IQ11	A0A0R4IQ11	scinla	101	36	42.7	571.11	DANRE	80553.4	Scinderin-like a	NA	0.200231	0.148745	0.266254	-0.0604743	0.674598	0.846249	-0.159922	0.276703	0.676504	0.100783	0.453336	0.605562	0.383499	0.0876247	0.317136	-0.128988	0.119576	-0.0287683	0.171968	0.440109	-0.0572215	-0.0493305	-0.0119837	0.317606	0.130666	0.167095	0.259165
A0A0R4IGG3	A0A0R4IGG3|A0A2R8QNR8|Q90XG0|E9QBF0	tpi1b	238	21	89.1	570.88	DANRE	27111.4	Triosephosphate isomerase	NA	0.652942	0.0289514	0.0864046	-0.292894	0.325983	0.578846	0.317674	0.288325	0.685367	1.26351	0.000388958	0.00517062	1.03451	0.0343601	1.11606	-0.754848	0.00756319	0.0249667	0.650075	0.381359	0.862578	-0.912093	0.742263	-0.00820591	-0.396122	0.188325	0.0471351
Q1MTI4	Q1MTI4	tpi1a	32	5	71.7	265.86	DANRE	27195.2	Triosephosphate isomerase A	SUBCELLULAR LOCATION: Cytoplasm {ECO:0000255|PROSITE-ProRule:PRU10127}.	1.21664	0.0921595	0.190943	-0.146077	0.842829	0.930105	-0.0643435	0.93036	0.983972	1.29837	0.0743873	0.183021	1.06545	0.242404	1.27076	-1.8506	-0.547493	-1.47775	0.700098	0.674559	0.994746	-2.01971	0.799079	0.196798	-0.0185044	0.412525	0.548542
Q7ZW95	Q7ZW95	rpl4	97	37	70.6	568	DANRE	42836.7	Ribosomal protein L4	NA	0.525514	0.068798	0.157231	0.299789	0.31348	0.568586	-0.318781	0.285058	0.681175	-0.0930568	0.730726	0.821985	0.0428664	0.603177	0.00958766	-0.592355	-0.345662	-0.671134	0.519402	0.406846	-0.0863605	-0.517349	0.196847	0.521846	0.308805	0.237372	0.468085
B0S5C5	B0S5C5	acaa2	83	11	83.6	567.49	DANRE	42184.7	Acetyl-CoA acyltransferase 2	NA	0.598194	0.00572051	0.0292315	0.499678	0.0239059	0.125054	0.508805	0.0218873	0.197546	0.60732	0.00519434	0.0296619	0.579243	0.0836553	0.0177022	-0.540548	0.83952	-0.294659	0.269564	0.125657	0.136395	-0.792376	0.718962	0.13138	-0.426602	0.0614828	-0.231074
A0A0G2KML7	A0A0G2KML7	LOC103910030	4	2	81.8	347.63	DANRE	25140.3	Uncharacterized protein	NA	0.884894	0.030071	0.0882917	0.665297	0.113704	0.320586	-0.0433206	0.913687	0.981067	0.176276	0.63526	0.753636	-0.284557	0.601978	0.483084	-0.973361	-0.250898	-0.996154	0.535444	0.320147	-0.0241003	-0.854789	1.09505	0.626521	0.0416009	0.464098	0.259717
B8A5D3	B8A5D3	nars1	64	37	53.9	566.3	DANRE	64679.3	Asparagine--tRNA ligase	NA	0.119647	0.254484	0.385832	0.0446046	0.687309	0.853089	-0.145688	0.201974	0.597048	-0.0706457	0.49377	0.63984	0.170138	0.265359	0.129859	-0.0575182	-0.075773	-0.0844981	0.230197	0.238319	-0.0605357	0.0434208	0.0956121	0.22657	0.182684	0.185885	0.268959
E7FCW1	E7FCW1	E7FCW1	108	33	63.6	565.02	DANRE	56906.4	Wu:fk65c09	NA	0.674624	0.0087238	0.0383944	-0.0703037	0.770293	0.897872	0.614727	0.0218977	0.197546	1.35965	3.28074e-05	0.0010949	1.03098	-0.306071	0.586584	-0.686578	1.05652	0.266832	0.670739	0.0538118	0.539581	-0.890215	-0.120188	0.0257909	-0.711319	-0.0896813	-0.726533
A0A2R8RRC9	A0A2R8RRC9	hadhb	108	30	62.7	564.4	DANRE	48549.3	Hydroxyacyl-CoA dehydrogenase trifunctional multienzyme complex subunit beta	NA	0.647659	0.00208517	0.0155762	0.248583	0.195488	0.434182	0.230629	0.227637	0.624967	0.629704	0.00254902	0.0185994	0.578311	0.214878	0.264077	-0.257586	0.561281	0.00654814	0.141367	0.109254	0.0278601	-0.737106	0.7007	0.436681	-0.476802	0.187802	-0.170527
A0A140LG76	A0A140LG76|Q7SY23	aldh4a1	76	33	58.6	563.27	DANRE	61905.2	Multifunctional fusion protein	NA	0.272621	0.15271	0.270456	0.300973	0.144539	0.366903	-0.124801	0.530698	0.849827	-0.153153	0.408724	0.563294	-0.0747563	0.0236776	-0.286362	0.30683	0.342558	0.0698933	-0.140408	0.155557	-0.565276	0.069746	0.0583922	0.340091	-0.171731	0.327269	-0.448734
Q1MT86	Q1MT86|F8W4C4	Q1MT86	67	33	44.9	563.16	DANRE	95593.8	Ubiquitin carboxyl-terminal hydrolase	NA	-0.139507	0.364283	0.499629	-0.125749	0.446733	0.685228	0.0753739	0.64589	0.896528	0.061616	0.68468	0.788943	-0.251263	-0.0820408	0.292242	-0.0553235	0.206098	0.355108	-0.225727	0.151451	0.179327	0.054437	0.073942	-0.048201	0.0367215	-0.250287	0.293115
Q7SX99	Q7SX99|F1QWR4|A0A2R8RJC4	fh	153	32	74	560.88	DANRE	55031.2	Fumarate hydratase, mitochondrial	SUBCELLULAR LOCATION: [Isoform Mitochondrial]: Mitochondrion {ECO:0000250|UniProtKB:P07954}.; SUBCELLULAR LOCATION: [Isoform Cytoplasmic]: Cytoplasm, cytosol {ECO:0000250|UniProtKB:P07954}. Nucleus {ECO:0000250|UniProtKB:P07954}. Chromosome {ECO:0000250|UniProtKB:P07954}. Note=Translocates to the nucleus in response to DNA damage: localizes to DNA double-strand breaks (DSBs). {ECO:0000250|UniProt…	0.876001	7.7243e-05	0.00220931	0.714086	0.000889364	0.0159367	0.194679	0.262214	0.661743	0.356594	0.0374956	0.115305	0.117212	0.238684	-0.108623	-0.219371	0.622116	-0.36415	0.231951	0.463643	-0.306841	-0.743019	0.791389	0.256479	-0.649359	0.456418	-0.477029
F1R838	F1R838|Q5PRA2|A0A2R8QSM2	dhtkd1	57	32	46.7	559.55	DANRE	104377	Probable 2-oxoglutarate dehydrogenase E1 component DHKTD1, mitochondrial	NA	0.541136	0.00226429	0.0162031	0.553517	0.0033141	0.036891	-0.221012	0.174734	0.555175	-0.233393	0.125546	0.258135	0.0913932	0.348155	-0.242443	0.0446854	0.23803	-0.594045	0.0506786	0.444585	-0.590244	-0.088392	0.370339	0.465539	-0.130595	0.504497	-0.227467
E7FF41	E7FF41	ahsg1	80	34	67	558.75	DANRE	51876.7	Alpha-2-HS-glycoprotein 1	SUBCELLULAR LOCATION: Secreted {ECO:0000256|ARBA:ARBA00004613}.	0.70271	0.0069117	0.0332328	0.76893	0.0063787	0.0545848	0.403958	0.111358	0.451268	0.337738	0.146866	0.287699	-0.143561	-0.223301	0.289326	-0.364778	0.29523	-0.28909	0.430123	0.3845	-0.739741	-0.554966	0.919138	0.378978	-0.829146	0.0366466	-0.485126
F1Q6R2	F1Q6R2|A0A0R4IJ39	c4b	52	42	26.2	557.85	DANRE	195572	Complement 4B (Chido blood group) (Fragment)	SUBCELLULAR LOCATION: Secreted {ECO:0000256|ARBA:ARBA00004613}.	-0.546936	0.182362	0.305398	0.512993	0.242851	0.491248	0.959022	0.0397397	0.265426	-0.100906	0.798894	0.866687	-0.115591	-0.228681	-0.180032	-0.0812031	-0.37862	0.416717	1.76772	-1.05378	-0.51297	-0.151534	-0.144029	-0.527685	0.337539	-0.365842	-0.0930528
F1QPJ6	F1QPJ6|F1QPX6	F1QPJ6	70	36	64.8	556.38	DANRE	56332.8	Zgc:152830	NA	0.122676	0.696736	0.787425	-0.220766	0.518375	0.740584	-0.337782	0.32836	0.722103	0.00565915	0.985612	0.991592	0.060317	0.789086	0.0373693	-0.513961	-0.383781	-0.272714	0.309013	-0.0670242	0.677946	-0.225872	-0.21034	0.370453	0.450562	-0.121531	0.769552
F1QTT3	F1QTT3|A0A2R8QDB8	jupa	77	29	60.2	556.23	DANRE	80531.5	Junction plakoglobin	SUBCELLULAR LOCATION: Cell junction, desmosome {ECO:0000256|ARBA:ARBA00004568}. Membrane {ECO:0000256|ARBA:ARBA00004170}; Peripheral membrane protein {ECO:0000256|ARBA:ARBA00004170}.	0.28349	0.121912	0.231539	-0.381075	0.0601646	0.222192	0.149128	0.43455	0.795469	0.813693	0.000392195	0.00519289	0.863804	0.0970668	0.869616	-0.312841	0.180187	0.0359769	0.318907	0.159695	0.753332	-0.421264	0.249728	0.100453	-0.0957638	0.0447043	0.0978271
F1QUV8	F1QUV8|F8W4M8	jupb	2	2	13.9	125.34	DANRE	80149.5	Junction plakoglobin	SUBCELLULAR LOCATION: Cell junction, desmosome {ECO:0000256|ARBA:ARBA00004568}. Membrane {ECO:0000256|ARBA:ARBA00004170}; Peripheral membrane protein {ECO:0000256|ARBA:ARBA00004170}.	-0.140115	0.474255	0.601665	-0.268168	0.214398	0.457589	-0.11163	0.595913	0.87829	0.0164231	0.932472	0.95956	0.244017	0.596308	0.0860686	0.0190156	0.0565956	0.202221	-0.0836683	-0.334794	0.552767	-0.0207487	0.0363739	0.0541066	0.512383	0.143301	0.508732
Q7SYK7	Q7SYK7	got2a	180	27	68.9	547.28	DANRE	47871.3	Aspartate aminotransferase, mitochondrial	SUBCELLULAR LOCATION: Mitochondrion matrix {ECO:0000250|UniProtKB:P00505}. Cell membrane {ECO:0000250|UniProtKB:P00505}.	1.06359	6.76139e-05	0.00205669	0.705834	0.00362113	0.0390671	0.0719496	0.723203	0.926826	0.429706	0.0364521	0.11325	0.260571	0.343473	-0.0681335	-0.532082	0.476077	-0.370988	0.258499	0.598529	-0.495106	-0.847917	0.877683	0.366261	-0.730061	0.553618	-0.282419
F1QCD4	F1QCD4	got2b	69	22	67	464.95	DANRE	47809	Aspartate aminotransferase	NA	0.768836	0.000231065	0.00409333	0.426867	0.0222988	0.120452	-0.0929027	0.581514	0.870446	0.249067	0.125848	0.258589	0.192691	0.325239	-0.07598	-0.187165	0.415415	-0.0911891	0.0789024	0.596957	-0.25441	-0.625903	0.614617	0.339814	-0.356353	0.58818	-0.055734
X1WG18	X1WG18|A0A2R8RJI9	muc5.2	49	29	7.5	546.09	DANRE	637147	Mucin 5.2	NA	0.254503	0.535934	0.657553	-0.533903	0.238873	0.486726	-0.0383873	0.930596	0.983972	0.750019	0.0838523	0.198992	1.09624	-0.163763	0.536657	-0.16437	-0.264506	0.384151	1.02831	-0.154342	-0.487543	-0.343235	-1.21839	0.13263	-0.389048	-0.267088	-0.573921
X1WBL9	X1WBL9	muc5.1	11	7	2.1	176.91	DANRE	582076	Mucin 5.1, oligomeric mucus/gel-forming	SUBCELLULAR LOCATION: Secreted {ECO:0000256|ARBA:ARBA00004613}.	0.531758	0.383283	0.517078	0.263817	0.685232	0.851972	0.900205	0.180919	0.566053	1.16815	0.0691987	0.17347	1.71917	-0.981384	-0.0253953	-1.09473	-0.180689	-0.0200579	1.66537	-0.548694	-1.61398	-1.13201	-0.648432	-0.33848	-1.27877	-0.617263	-1.10735
F1QGK0	F1QGK0	gpd1b	121	23	79.4	542.19	DANRE	42141.4	Glycerol-3-phosphate dehydrogenase [NAD(+)]	NA	0.746576	0.000235725	0.00411007	0.106828	0.515919	0.738141	0.301005	0.0826806	0.391898	0.940753	2.69734e-05	0.000981177	0.653431	0.196033	0.556027	-0.560057	0.297853	0.216919	0.781704	0.23583	0.151942	-0.798707	0.424666	0.0729943	-0.539389	0.296754	-0.286541
Q7T3H5	Q7T3H5	gpd1c	32	19	68.1	373.99	DANRE	38806.3	Glycerol-3-phosphate dehydrogenase [NAD(+)]	NA	0.341181	0.109408	0.215554	0.01582	0.942266	0.97741	0.255919	0.253838	0.656809	0.58128	0.0118476	0.0526456	0.617544	0.241649	0.594095	-0.541116	0.105877	-0.260815	0.655329	-0.0821729	0.242095	-0.342934	0.180944	0.0638215	-0.288918	0.00922496	0.0407661
Q567A1	Q567A1|B0V3S2	gpd1a	26	15	58.1	374.77	DANRE	38590.8	Glycerol-3-phosphate dehydrogenase [NAD(+)]	NA	0.747259	0.000777535	0.00838627	0.780805	0.00101042	0.0172546	0.55243	0.0104946	0.131116	0.518884	0.00965699	0.0455617	0.290947	0.0662568	0.283117	-0.4932	0.667234	-0.370891	0.680499	0.397383	-0.30745	-0.74902	0.916477	0.0529354	-0.664944	0.292649	-0.272648
A0A0R4IPV5	A0A0R4IPV5|P05307|A6H7J6	p4hb	86	36	55.5	540.91	DANRE	57032.2	Protein disulfide-isomerase	SUBCELLULAR LOCATION: Endoplasmic reticulum lumen {ECO:0000256|ARBA:ARBA00004319}.	-0.49766	0.189871	0.313174	-0.0316017	0.936388	0.975462	-0.170885	0.667183	0.904232	-0.636943	0.100183	0.222267	-0.376202	0.130887	-0.361705	-0.493417	-0.416405	-0.387942	0.091395	-0.249973	0.277854	-0.23148	-0.405792	0.173483	1.1629	-0.345259	1.26177
Q804H2	Q804H2|A2BFV8	anxa1a	106	34	70.8	539.91	DANRE	38038.7	Annexin	SUBCELLULAR LOCATION: Basolateral cell membrane {ECO:0000256|ARBA:ARBA00004187}. Cell membrane {ECO:0000256|ARBA:ARBA00004236}. Cell projection, cilium {ECO:0000256|ARBA:ARBA00004138}. Cytoplasm {ECO:0000256|ARBA:ARBA00004496}. Lateral cell membrane {ECO:0000256|ARBA:ARBA00004124}. Membrane {ECO:0000256|ARBA:ARBA00004370}. Nucleus {ECO:0000256|ARBA:ARBA00004123}.	0.437071	0.0514081	0.127905	-0.290151	0.209797	0.45111	0.204554	0.369118	0.749204	0.931775	0.000536022	0.00642517	0.95319	0.204303	0.774306	-0.679334	0.0745539	0.10569	0.61263	-0.0682251	0.492027	-0.5534	0.186273	0.227312	-0.219146	-0.0169936	0.0499938
A5PMP0	A5PMP0|Q66HU4	capn2b	63	34	57.3	538.64	DANRE	79059.9	Calpain 2, (m/II) large subunit b	NA	0.414524	0.0276391	0.0835895	-0.225998	0.232291	0.477922	0.286337	0.136512	0.498805	0.926859	9.84443e-05	0.00212212	0.87101	0.0635452	0.802809	-0.543848	0.383095	0.0835902	0.488907	-0.126813	0.401418	-0.508901	0.0691232	0.0709649	-0.30862	0.101791	-0.187241
A0A0R4IFK0	A0A0R4IFK0|F1QMV0	capn2a	50	22	41.2	422.97	DANRE	79214.8	Calpain 2, (m/II) large subunit a	NA	0.371046	0.0786363	0.171437	-0.191895	0.377076	0.623702	-0.216674	0.320628	0.714988	0.346267	0.0982143	0.219365	0.480474	0.504409	0.302558	-0.432317	-0.0569416	0.0951534	0.387219	0.198339	0.403327	-0.394567	0.055172	0.381011	0.240202	0.296868	0.483125
B8JHR9	B8JHR9	kpnb3	50	32	39	537.58	DANRE	124220	Karyopherin (importin) beta 3	SUBCELLULAR LOCATION: Cytoplasm {ECO:0000256|ARBA:ARBA00004496}. Nucleus {ECO:0000256|ARBA:ARBA00004123}.	-0.376686	0.0677756	0.155624	-0.00961933	0.963109	0.985201	0.295365	0.171587	0.553866	-0.0717023	0.710358	0.807816	0.124809	-0.230705	0.295546	-0.0572972	0.0992111	-0.222491	0.195442	-0.0242222	0.509136	-0.136119	0.206739	-0.106757	0.484469	-0.151251	0.702756
A0A0G2L836	A0A0G2L836|A0A2R8QLL7|A0A2R8QHX0|A0A140LFY0|A0A140LFV3	nid1b	54	34	35.2	536.28	DANRE	139657	Nidogen 1b	SUBCELLULAR LOCATION: Membrane {ECO:0000256|ARBA:ARBA00004370}. Secreted, extracellular space, extracellular matrix, basement membrane {ECO:0000256|ARBA:ARBA00004302}.	0.333158	0.00140311	0.0121897	0.308034	0.00422042	0.0422865	-0.396151	0.00066088	0.028327	-0.371027	0.000601505	0.00696111	-0.154412	0.320366	-0.359777	0.0474863	0.0724097	-0.263567	-0.0559794	0.502051	-0.407573	0.0611872	0.0186742	0.426236	0.0112244	0.382758	0.178882
Q6P5L8	Q6P5L8|X1WFF1	hsdl2	82	31	83.8	533.69	DANRE	44705.4	Hydroxysteroid dehydrogenase-like protein 2	SUBCELLULAR LOCATION: Peroxisome {ECO:0000250}.	0.778289	0.00122514	0.0111265	0.651573	0.00708824	0.0582081	0.248375	0.24454	0.648629	0.37509	0.0684194	0.172435	0.187655	0.140419	0.0113554	-0.357069	0.593255	-0.32864	0.0451811	0.280763	-0.38136	-0.68103	0.933041	0.491716	-0.667775	0.188907	-0.305476
F1QM47	F1QM47	c7a	54	31	42.5	533.68	DANRE	100714	Complement component 7a (Fragment)	SUBCELLULAR LOCATION: Secreted {ECO:0000256|ARBA:ARBA00004613}.	0.210771	0.0363739	0.101298	0.617009	2.79037e-05	0.0020181	0.453142	0.000471644	0.0244412	0.0469048	0.611911	0.735066	-0.0959479	-0.121212	-0.00611078	-0.231666	0.444171	-0.22043	0.594445	0.0463418	-0.296054	-0.112524	0.348504	0.0763248	-0.234033	0.0354685	-0.227939
F1QET7	F1QET7|F1QK37	fscn1a	54	27	66.1	532.48	DANRE	55323.9	Fascin	SUBCELLULAR LOCATION: Cytoplasm, cytoskeleton {ECO:0000256|ARBA:ARBA00004245, ECO:0000256|PIRNR:PIRNR005682}.	0.107035	0.548543	0.667856	0.0107913	0.955019	0.982498	0.170207	0.381039	0.759444	0.266451	0.149353	0.290239	0.241626	0.0762275	0.431201	-0.290745	-0.0032614	0.0264529	0.503458	0.161366	0.38266	-0.324522	0.343633	0.228427	0.211379	-0.0217448	0.420022
A0A0A0MPL5	A0A0A0MPL5	A0A0A0MPL5	2	2	9.5	70.11	DANRE	55110.7	Fascin	NA	1.21297	0.00386924	0.0223282	0.32626	0.397246	0.642423	0.00359674	0.992445	0.997952	0.890308	0.0230151	0.0822655	0.531885	0.177843	0.364108	-1.2861	0.0811674	-0.271658	0.656643	0.446465	-0.270489	-1.72237	0.506353	0.723556	-0.0353978	0.296634	-0.163524
Q6PH46	Q6PH46	cct4	64	33	69	532.35	DANRE	57542.9	T-complex protein 1 subunit delta	SUBCELLULAR LOCATION: Cytoplasm {ECO:0000256|ARBA:ARBA00004496}.	0.679488	0.0244524	0.0768088	0.195464	0.509249	0.734064	-0.430173	0.159341	0.532703	0.053851	0.843057	0.900577	0.0956109	0.580755	0.109021	-0.524912	-0.183477	-0.75954	0.212697	0.53916	0.178535	-0.723482	0.274892	0.589408	0.152621	0.416853	0.503996
Q6TNU6	Q6TNU6	dldh	81	28	64.4	532.07	DANRE	54190.2	Dihydrolipoyl dehydrogenase	SUBCELLULAR LOCATION: Cell projection, cilium, flagellum {ECO:0000256|ARBA:ARBA00004230}. Cytoplasmic vesicle, secretory vesicle, acrosome {ECO:0000256|ARBA:ARBA00004218}.	1.13149	0.000695911	0.00780725	0.971241	0.00380874	0.0398845	0.230252	0.418607	0.785392	0.390502	0.15009	0.290952	0.206789	0.0426166	-0.0356276	-0.528562	0.564697	-0.984563	0.337459	0.55082	-0.623459	-1.04528	0.933922	0.68934	-0.946153	0.244319	-0.478877
E7F8W2	E7F8W2|A0A2R8Q856	igfn1.4	56	38	36.5	531.12	DANRE	136961	Immunoglobulin-like and fibronectin type III domain-containing 1, tandem duplicate 4	NA	-0.846404	0.212771	0.339299	-0.116445	0.869958	0.942445	-1.14294	0.125449	0.476122	-1.8729	0.012533	0.0544326	-0.914339	0.706241	-0.448109	0.176369	-1.34156	-1.94052	-0.70313	-1.58421	-1.22036	0.115033	-1.69713	1.33501	2.32729	-0.87436	0.349597
Q6DHT4	Q6DHT4	aldh6a1	84	29	66.6	530.52	DANRE	57632.2	Aldehyde dehydrogenase 6 family, member A1	NA	0.321389	0.00568775	0.0291424	0.409993	0.00182317	0.0256905	0.0678066	0.528728	0.848672	-0.0207973	0.83352	0.893097	0.00616983	0.100547	-0.013449	0.0279737	0.274064	-0.182991	0.161986	0.269462	-0.299743	-0.132355	0.42642	0.196871	-0.150311	0.311855	-0.152132
Q1LVV8	Q1LVV8|A0A0R4ITA5	smc3	52	40	31.3	528.05	DANRE	142077	Structural maintenance of chromosomes protein	SUBCELLULAR LOCATION: Chromosome, centromere {ECO:0000256|ARBA:ARBA00004584}. Nucleus {ECO:0000256|ARBA:ARBA00004123, ECO:0000256|PIRNR:PIRNR005719}.	0.0222456	0.809285	0.870061	0.120084	0.240316	0.488048	0.048951	0.624216	0.889718	-0.0488878	0.597474	0.723287	-0.0577243	-0.030796	-0.122048	0.0784817	0.0147313	0.143689	0.106443	-0.0953089	-0.203313	0.0256695	0.059531	0.0511455	-0.0986721	0.120096	-0.0493249
A0A2R8RXT8	A0A2R8RXT8|Q68EH2	ak1	221	30	85.5	527.79	DANRE	21544.5	Adenylate kinase isoenzyme 1	SUBCELLULAR LOCATION: Cytoplasm {ECO:0000256|ARBA:ARBA00004496, ECO:0000256|HAMAP-Rule:MF_03171}.	1.25198	5.26943e-06	0.000504147	0.657661	0.00315704	0.0359472	0.349282	0.0767576	0.376195	0.9436	8.87492e-05	0.00198855	0.195664	0.185128	0.289182	-0.891721	0.472068	-0.168957	0.726366	0.516892	-0.284732	-1.15957	0.797917	0.0285821	-1.0503	0.534071	-0.641651
Q6PFT2	Q6PFT2|E9QB99|A0A2R8Q5A9|E9QGS7	c6	55	20	43	526.56	DANRE	103596	C6 protein	SUBCELLULAR LOCATION: Secreted {ECO:0000256|ARBA:ARBA00004613}.	0.124908	0.637687	0.742465	0.275053	0.343627	0.594635	0.095243	0.738984	0.931392	-0.0549024	0.835428	0.894537	0.167608	0.384065	0.331926	-0.289646	0.115328	-0.434555	0.871016	-0.155086	-0.303106	-0.14931	-0.33978	0.354708	0.324855	-0.102574	0.0955822
Q66HV4	Q66HV4	copb1	54	33	41.1	525.98	DANRE	108114	Coatomer subunit beta	SUBCELLULAR LOCATION: Cytoplasm {ECO:0000250|UniProtKB:P23514}. Golgi apparatus membrane {ECO:0000250|UniProtKB:P23514}; Peripheral membrane protein {ECO:0000250|UniProtKB:P23514}; Cytoplasmic side {ECO:0000250|UniProtKB:P23514}. Cytoplasmic vesicle, COPI-coated vesicle membrane {ECO:0000250|UniProtKB:P23514}; Peripheral membrane protein {ECO:0000250|UniProtKB:P23514}; Cytoplasmic side {ECO:00002…	-0.127942	0.559083	0.677048	-0.164637	0.487671	0.716146	-0.0653053	0.781355	0.94444	-0.02861	0.895382	0.936211	0.187705	0.30022	0.202246	-0.296378	-0.0688338	-0.262241	0.0529842	-0.0690703	0.578091	-0.04617	0.0512882	0.0330517	0.448644	0.0442708	0.714144
Q6NWJ5	Q6NWJ5|A9JST4|I3ISC4|I3ISU3	tuba8l4	162	3	72.2	524.92	DANRE	50718.2	Tubulin alpha chain	SUBCELLULAR LOCATION: Cytoplasm, cytoskeleton {ECO:0000256|ARBA:ARBA00004245}.	0.5126	0.0106847	0.0438308	0.0964731	0.611827	0.807913	-0.322858	0.105679	0.442704	0.0932684	0.59634	0.723019	0.0410075	0.561275	0.0629791	-0.349164	0.0147804	-0.132628	0.16765	0.252219	0.0278015	-0.521539	0.106359	0.532587	0.0554247	0.330404	0.441365
Q6DC49	Q6DC49	tuba8l3	3	2	67.7	492.9	DANRE	50750.3	Tubulin alpha chain	SUBCELLULAR LOCATION: Cytoplasm, cytoskeleton {ECO:0000256|ARBA:ARBA00004245}.	0.902035	0.0272587	0.0826812	0.00753691	0.98492	0.993331	-0.77261	0.0701362	0.357493	0.121888	0.741818	0.828101	0.343536	0.806123	0.215027	-0.782361	-0.515325	-1.04315	0.399459	0.858007	0.376876	-0.637551	0.05769	0.861628	0.214872	0.487112	0.609769
Q6PC95	Q6PC95	tuba8l2	10	4	55.2	463.42	DANRE	50842.4	Tubulin alpha chain	SUBCELLULAR LOCATION: Cytoplasm, cytoskeleton {ECO:0000256|ARBA:ARBA00004245}.	0.380791	0.0724082	0.162039	0.340103	0.129826	0.345988	-0.384576	0.0905266	0.410299	-0.343888	0.100852	0.222997	-0.514958	0.276733	-0.310022	0.149348	-0.12516	0.162135	0.218397	0.285156	-0.758595	0.322509	-0.139008	0.44845	-0.110443	0.466939	-0.407302
A0A2R8RVU0	A0A2R8RVU0|Q6TGS5|A0A0R4IXS8	tuba4l	10	6	51.5	388.98	DANRE	51830.4	Tubulin alpha chain	SUBCELLULAR LOCATION: Cytoplasm, cytoskeleton {ECO:0000256|ARBA:ARBA00004245}.	-0.765464	0.445805	0.576176	-0.831244	0.443418	0.683783	-0.925038	0.395015	0.7694	-0.859258	0.393495	0.548023	-1.30486	0.962906	-0.787934	-1.91924	-1.49611	-1.09967	-1.29427	-1.14027	0.828522	-1.69956	-1.47632	-0.194223	2.09424	-1.61719	2.59764
Q6P972	Q6P972	tuba2	6	3	51.2	388.6	DANRE	50777.3	Tubulin alpha chain	SUBCELLULAR LOCATION: Cytoplasm, cytoskeleton {ECO:0000256|ARBA:ARBA00004245}.	-0.0287011	0.791615	0.856143	0.0929639	0.433257	0.673189	0.170208	0.162709	0.538563	0.0485426	0.655808	0.770232	0.094808	-0.0465567	0.169259	0.282207	0.367732	0.345735	0.109838	0.147712	0.031183	0.12673	0.28206	0.235147	-0.0444673	-0.00429291	0.0823444
Q6TNP9	Q6TNP9	tuba5	9	4	46.9	366.97	DANRE	50718.2	Tubulin alpha chain	SUBCELLULAR LOCATION: Cytoplasm, cytoskeleton {ECO:0000256|ARBA:ARBA00004245}.	-0.720908	0.00572106	0.0292315	-0.0932724	0.698101	0.859011	0.210871	0.386311	0.763371	-0.416764	0.0781366	0.18947	-0.0400949	0.0303608	-0.189294	-0.227046	-0.0357947	0.0857263	-0.536305	-0.669895	-0.0511102	0.400129	0.146202	-0.380112	0.464274	-0.391701	0.834926
Q6GQM1	Q6GQM1	tuba7l	9	5	42.2	350.3	DANRE	50618.2	Tubulin alpha chain	SUBCELLULAR LOCATION: Cytoplasm, cytoskeleton {ECO:0000256|ARBA:ARBA00004245}.	-1.20938	0.392557	0.525873	-0.302416	0.840911	0.929297	-0.241448	0.872639	0.971381	-1.14841	0.416193	0.570859	-2.83396	-3.44065	-2.70403	0.860794	0.327395	0.780875	-4.3569	-1.86047	-3.7318	-0.0253118	-3.24442	-4.2668	-1.80386	0.835131	-2.92688
Q6NVI6	Q6NVI6	cct5	74	35	71.1	524.44	DANRE	59964.2	Chaperonin-containing TCP1, subunit 5 (epsilon)	NA	0.260223	0.171008	0.292722	-0.040175	0.839031	0.929059	-0.526484	0.0178221	0.178696	-0.226086	0.230114	0.38522	0.0145602	0.447924	-0.00409515	-0.124703	-0.365851	-0.348359	0.000831889	0.457942	0.015988	-0.275302	0.00306483	0.326599	0.341917	0.390866	0.640527
Q8JFV8	Q8JFV8	vat1	91	29	50.2	524.19	DANRE	53790.3	Synaptic vesicle membrane protein VAT-1 homolog	NA	0.667976	0.00431161	0.0240919	0.162562	0.449774	0.687558	-0.596605	0.0135369	0.148834	-0.0911911	0.644598	0.76087	0.0322216	0.845808	-0.0669273	-0.423004	-0.119518	-0.434177	0.328778	0.428476	-0.185076	-0.290298	-0.212043	0.768179	0.0472668	0.340248	0.376842
B0V0X1	B0V0X1	pccb	68	32	54.7	522.05	DANRE	61251.9	Propionyl-CoA carboxylase subunit beta	NA	0.425858	0.00541451	0.028216	0.295206	0.051817	0.201637	-0.0186164	0.894547	0.97704	0.112036	0.39564	0.550101	0.104775	0.242333	0.0366881	-0.20243	0.221887	-0.171555	0.0147975	0.408613	-0.0791223	-0.329639	0.567024	0.289062	-0.127108	0.206068	0.10182
A5PMV7	A5PMV7	ppp2r1ba	64	12	54.8	520.72	DANRE	66220.3	Protein phosphatase 2, regulatory subunit A, beta a	NA	0.471355	0.00148324	0.012559	0.195817	0.145894	0.368864	-0.00838612	0.948155	0.987763	0.267152	0.0402807	0.121167	0.257698	0.27713	0.182846	-0.338524	0.16258	-0.189216	0.329334	0.245215	-0.0403186	-0.332602	0.253793	0.333273	-0.243445	0.172203	0.0569729
Q642H5	Q642H5	ppp2r1bb	19	11	52.1	505.42	DANRE	65899.1	Protein phosphatase 2 (Formerly 2A), regulatory subunit A, beta isoform	NA	0.259793	0.0396824	0.106548	-0.0984403	0.436476	0.676863	-0.0978059	0.439367	0.799685	0.260427	0.0392749	0.118964	0.213293	0.19985	0.338838	-0.17804	-0.135545	0.0979207	0.127316	0.264108	0.185763	-0.180379	0.339769	0.221444	-0.0253598	0.147875	0.177886
A0A0R4IHT0	A0A0R4IHT0|A0A0R4II73|A0A0R4IB76	slc25a12	62	34	55.2	520.44	DANRE	75700.3	Solute carrier family 25 member 12	SUBCELLULAR LOCATION: Membrane {ECO:0000256|ARBA:ARBA00004141}; Multi-pass membrane protein {ECO:0000256|ARBA:ARBA00004141}. Mitochondrion inner membrane {ECO:0000256|ARBA:ARBA00004448}; Multi-pass membrane protein {ECO:0000256|ARBA:ARBA00004448}.	0.449858	0.0243394	0.0766057	0.334838	0.102523	0.300183	-0.217546	0.274161	0.673404	-0.102526	0.570944	0.702982	0.202158	0.25028	-0.412258	0.238838	0.17453	-0.271186	0.0508238	0.285758	-0.551229	0.0185825	0.00477404	0.264065	-0.502539	0.376916	-0.377293
E7F2X0	E7F2X0|F1R7T2|F8W496	clip1a	60	37	30.6	520.3	DANRE	175885	CAP-GLY domain-containing linker protein 1a	SUBCELLULAR LOCATION: Cytoplasm, cytoskeleton {ECO:0000256|ARBA:ARBA00004245}.	-0.416983	0.000152819	0.0033073	-0.754327	7.97847e-07	0.000305665	-0.0072097	0.93377	0.985128	0.330134	0.0010898	0.0104862	0.65928	-0.194305	0.584875	0.364981	-0.0331753	0.526264	-0.24776	-0.0295447	0.682785	0.293298	-0.142142	-0.167997	0.243915	-0.143419	0.230474
Q6PBI0	Q6PBI0	sucla2	109	20	63.7	520.05	DANRE	50429.5	Succinate--CoA ligase [ADP-forming] subunit beta, mitochondrial	SUBCELLULAR LOCATION: Mitochondrion {ECO:0000256|HAMAP-Rule:MF_03220}.	1.30851	6.71835e-05	0.00205669	0.999719	0.00131096	0.0205762	0.0637147	0.798399	0.951955	0.372509	0.123887	0.255551	0.12407	0.349857	-0.280769	-0.514227	0.669707	-0.764233	0.139611	0.62676	-0.763584	-1.15693	0.926453	0.528898	-0.961051	0.553988	-0.542348
Q9PVF8	Q9PVF8|X1WG13	ctnna1	49	30	46.5	510.97	DANRE	101259	Catenin (Cadherin-associated protein), alpha	SUBCELLULAR LOCATION: Cell junction, adherens junction {ECO:0000256|ARBA:ARBA00004536}. Cell membrane {ECO:0000256|ARBA:ARBA00004413}; Peripheral membrane protein {ECO:0000256|ARBA:ARBA00004413}; Cytoplasmic side {ECO:0000256|ARBA:ARBA00004413}. Cytoplasm, cytoskeleton {ECO:0000256|ARBA:ARBA00004245}.	0.0680566	0.526365	0.648574	-0.0489515	0.671711	0.8446	0.0102537	0.929018	0.9839	0.127262	0.245227	0.400356	0.313911	0.110763	0.331998	-0.0682013	0.0857589	-0.144702	0.089333	0.0333276	0.124181	0.0383963	0.147095	0.157392	-0.0132408	0.0870846	0.159387
B7ZC77	B7ZC77|B8A6A9|A0A286Y8G3|F1Q548|A0A2R8QSE5|B8JKG9	Ctnna2	3	3	10.8	92.31	DANRE	96596.4	Catenin alpha-2	SUBCELLULAR LOCATION: Cell membrane {ECO:0000250|UniProtKB:Q61301}; Peripheral membrane protein {ECO:0000250|UniProtKB:Q61301}; Cytoplasmic side {ECO:0000250|UniProtKB:Q61301}. Cytoplasm {ECO:0000250|UniProtKB:Q61301}. Cytoplasm, cytoskeleton {ECO:0000250|UniProtKB:Q61301}. Cell junction, adherens junction {ECO:0000250|UniProtKB:Q61301}. Cell projection, axon {ECO:0000250|UniProtKB:Q61301}. Nucle…	-0.883591	0.029365	0.0870654	-0.452284	0.266474	0.518336	0.164653	0.67932	0.909337	-0.266654	0.472701	0.622383	-0.561694	-0.502591	-0.554228	0.448812	0.122762	0.354467	-0.546859	-0.412083	1.33169	0.672318	-0.505078	-0.331023	0.668603	-0.651817	-0.152884
Q9PUQ6	Q9PUQ6	tmod4	110	29	82.7	509.88	DANRE	38807.3	Sk-tropomodulin	NA	-0.479821	0.000196446	0.00377533	-0.899226	7.35024e-07	0.000305665	0.10618	0.311028	0.705241	0.525585	8.54541e-05	0.00192834	0.844569	-0.305899	0.90625	0.304792	-0.145484	0.81594	-0.114412	0.00569703	0.753569	0.239584	0.0524644	-0.335694	0.326878	-0.0654005	0.346735
B3DKJ0	B3DKJ0	cct7	53	29	57.7	509.65	DANRE	60276.4	T-complex protein 1 subunit eta	SUBCELLULAR LOCATION: Cytoplasm {ECO:0000256|ARBA:ARBA00004496, ECO:0000256|RuleBase:RU365042}.	0.3721	0.0778748	0.170374	-0.0707086	0.741437	0.88202	-0.428524	0.0621401	0.336418	0.0142843	0.942485	0.965409	0.111685	0.415487	0.177123	-0.319641	-0.287103	-0.319984	0.124841	0.439791	0.21829	-0.343814	0.0904708	0.458844	0.26108	0.304253	0.532351
A0A2R8Q0N5	A0A2R8Q0N5|Q5U3U3|B2GQ15|B0S7W8	cpt2	57	33	48.1	508.8	DANRE	75501.6	Carnitine O-palmitoyltransferase 2, mitochondrial	NA	0.735403	0.000404002	0.00569373	0.490187	0.0120157	0.0815752	0.0581827	0.734199	0.929385	0.303398	0.0728117	0.180001	0.181983	0.206353	-0.135017	-0.191799	0.540291	-0.177393	-0.0250346	0.380301	-0.374148	-0.455739	0.576873	0.461497	-0.545875	0.175291	-0.524756
Q6IQ59	Q6IQ59	uqcrc2b	87	25	62.7	506.23	DANRE	48350.1	Ubiquinol-cytochrome c reductase core protein 2b	NA	0.761043	0.00229745	0.0162616	0.870147	0.00151491	0.0227093	0.65763	0.00973619	0.127051	0.548526	0.0172688	0.0683531	0.291808	0.11421	-0.116615	-0.522198	0.766831	-0.384382	0.543806	0.249965	0.218869	-1.00942	1.30707	0.27885	-0.390155	0.216722	-0.26265
Q6P0T7	Q6P0T7|B7ZVL6|A0A1D5NSI6|A0A1D5NS25|Q9I8U9	tnnt3b	342	3	64.9	505.81	DANRE	27293.4	Tnnt3b protein	NA	-0.575285	0.0009566	0.009564	-1.19857	1.83488e-06	0.000430924	0.234615	0.131904	0.489806	0.857897	2.69219e-05	0.000981177	1.40566	-0.350311	1.16305	0.182238	-0.153827	0.758634	-0.158165	-0.160135	1.05512	0.108125	0.00314156	-0.462526	0.165454	-0.377288	0.495062
E9QIW4	E9QIW4|E9QEG1	tnnt3b	3	2	51.2	370.69	DANRE	27180.5	Troponin T type 3b (skeletal, fast) (Fragment)	NA	-0.611567	0.00417776	0.023578	-1.90732	1.96266e-07	0.000124452	-0.201894	0.307572	0.702738	1.09386	3.34175e-05	0.00110943	1.30631	-0.70648	1.216	0.097652	-0.682354	1.33045	-0.450953	-0.112517	1.35085	0.468872	-0.685939	-0.0021997	0.314569	-0.796888	-0.0529102
A0A286YBM7	A0A286YBM7|A0A0M3HEN7	phka1b	49	24	32.2	504.14	DANRE	133777	Phosphorylase b kinase regulatory subunit	SUBCELLULAR LOCATION: Cell membrane {ECO:0000256|ARBA:ARBA00004342, ECO:0000256|RuleBase:RU364123}; Lipid-anchor {ECO:0000256|ARBA:ARBA00004342, ECO:0000256|RuleBase:RU364123}; Cytoplasmic side {ECO:0000256|ARBA:ARBA00004342, ECO:0000256|RuleBase:RU364123}. Membrane {ECO:0000256|ARBA:ARBA00004423}; Lipid-anchor {ECO:0000256|ARBA:ARBA00004423}; Cytoplasmic side {ECO:0000256|ARBA:ARBA00004423}.	0.267002	0.0762941	0.167948	0.190413	0.225602	0.469338	0.602828	0.00146967	0.0444337	0.679417	0.000299534	0.00441709	0.529039	-0.17085	0.279768	0.0452577	0.641361	0.234299	0.300505	0.0483234	0.388501	-0.589921	0.703078	-0.0722176	-0.457337	-0.0233113	-0.284061
A0A286YAZ5	A0A286YAZ5|E7F4R5|A0A1L1QZM1	hdac8	18	15	18.3	279.58	DANRE	139466	Phosphorylase b kinase regulatory subunit	SUBCELLULAR LOCATION: Cell membrane {ECO:0000256|ARBA:ARBA00004342, ECO:0000256|RuleBase:RU364123}; Lipid-anchor {ECO:0000256|ARBA:ARBA00004342, ECO:0000256|RuleBase:RU364123}; Cytoplasmic side {ECO:0000256|ARBA:ARBA00004342, ECO:0000256|RuleBase:RU364123}. Membrane {ECO:0000256|ARBA:ARBA00004423}; Lipid-anchor {ECO:0000256|ARBA:ARBA00004423}; Cytoplasmic side {ECO:0000256|ARBA:ARBA00004423}.	0.348965	0.00816578	0.0368693	0.447746	0.00266734	0.0327149	0.14108	0.263317	0.662945	0.0422994	0.710969	0.80796	-0.115822	0.0178192	-0.0486426	0.0330385	0.318348	-0.0656047	0.185692	0.31912	-0.28836	-0.0570394	0.450376	0.218204	-0.345111	0.15309	-0.318515
B8JMZ1	B8JMZ1	ugp2a	100	19	60.3	503.29	DANRE	56991.6	UTP--glucose-1-phosphate uridylyltransferase	NA	0.592966	0.00249742	0.0171357	0.302702	0.100273	0.29615	0.165715	0.350126	0.734023	0.455979	0.0130082	0.0559222	0.352499	0.0427582	0.23695	-0.19597	0.298552	0.0458673	0.282217	0.532619	-0.20917	-0.545738	0.646946	0.0516533	-0.481706	0.347063	-0.174357
A0A0R4IBN4	A0A0R4IBN4|F1QDY2|Q6NWJ8|E9QI72	ugp2b	8	6	35.2	246.63	DANRE	57119.6	UTP--glucose-1-phosphate uridylyltransferase	NA	-0.604803	0.0285923	0.0856554	-0.454669	0.11017	0.315248	-0.186008	0.495137	0.829321	-0.336142	0.194048	0.346218	-0.041021	0.177876	0.119666	-0.155692	-0.353419	0.0892467	-0.209719	-0.253395	0.536587	0.145113	-0.27251	-0.0789553	0.936038	-0.215692	1.12359
F1QEG2	F1QEG2	klhl41b	84	31	47.1	503.27	DANRE	69510.4	Kelch-like protein 41b	SUBCELLULAR LOCATION: Cytoplasm {ECO:0000250|UniProtKB:O60662}. Cytoplasm, cytoskeleton {ECO:0000250|UniProtKB:A2AUC9}. Sarcoplasmic reticulum membrane {ECO:0000250|UniProtKB:O60662}. Endoplasmic reticulum membrane {ECO:0000250|UniProtKB:O60662}.	1.3718	1.5031e-06	0.000264796	0.492431	0.0157229	0.097648	-0.684367	0.0019951	0.0513027	0.195004	0.255551	0.41182	-0.227268	0.550018	-0.289348	-0.490585	-0.199184	-0.282096	0.435119	1.11109	-0.749726	-0.606759	0.080031	0.612713	-0.644921	0.884934	-0.586191
E9QIN8	E9QIN8	klhl41a	45	25	41.4	373.13	DANRE	68796.8	Kelch-like protein 41a	SUBCELLULAR LOCATION: Cytoplasm {ECO:0000250|UniProtKB:O60662}. Cytoplasm, cytoskeleton {ECO:0000250|UniProtKB:A2AUC9}. Sarcoplasmic reticulum membrane {ECO:0000250|UniProtKB:O60662}. Endoplasmic reticulum membrane {ECO:0000250|UniProtKB:O60662}.	2.26314	4.98498e-08	4.51639e-05	1.22578	8.17788e-05	0.00398892	-0.645418	0.0107254	0.131823	0.391946	0.0725326	0.17952	-0.732437	0.80741	-0.77932	-1.22881	-0.270195	-1.00348	0.776548	0.986125	-1.19706	-1.48889	0.386757	1.27985	-1.31741	0.699094	-1.24498
A2BIN5	A2BIN5	mccc2	57	26	57	502.47	DANRE	62176.9	Methylcrotonoyl-CoA carboxylase 2 (beta)	NA	0.737924	0.000238032	0.00411335	0.451555	0.0137249	0.0888056	-0.12882	0.430407	0.794096	0.157549	0.301967	0.459068	0.00814346	0.307852	-0.0748714	-0.417163	0.343515	-0.198015	0.0515842	0.509041	-0.272406	-0.614975	0.556706	0.554505	-0.176502	0.412957	0.0412969
Q7SYB8	Q7SYB8|A0A2R8Q918|Q5RGX8|A0A0R4IT49	gys1	62	31	43.1	500.19	DANRE	81498.8	Glycogen [starch] synthase	NA	0.740429	1.98237e-05	0.0010116	0.656739	0.000131643	0.00522565	0.124769	0.32548	0.720235	0.208459	0.0882527	0.206079	0.0263443	0.309526	-0.00432365	-0.356088	0.492937	-0.401569	0.401376	0.468911	-0.380379	-0.493304	0.505958	0.187108	-0.43344	0.402404	-0.310933
Q803T5	Q803T5	ahcy	95	29	70.4	499.66	DANRE	48534.1	Adenosylhomocysteinase	NA	0.486724	0.110661	0.217348	0.014607	0.962757	0.985129	-0.33186	0.299295	0.695541	0.140257	0.629779	0.748721	0.157759	0.372377	0.178589	-0.501154	-0.447423	-0.703294	0.193599	0.365238	0.291715	-0.525154	0.241222	0.657063	-0.164192	-0.0840422	0.554241
B8A4D7	B8A4D7|E9QFY1	rrbp1a	53	41	33.6	497.74	DANRE	145971	Ribosome-binding protein 1a	NA	-0.345366	0.0171669	0.0603505	-0.106247	0.449919	0.687558	-0.18327	0.202154	0.597048	-0.422389	0.00535416	0.0302322	-0.197329	-0.00672577	-0.0607925	0.0120257	-0.261397	-0.285415	-0.113357	-0.128685	0.0205571	0.160421	-0.336222	0.000442069	0.640627	-0.0799172	0.353503
F1R246	F1R246	dars1	55	35	67.4	496.76	DANRE	60940.2	Aspartate--tRNA ligase, cytoplasmic	NA	0.274389	0.0552623	0.134436	0.187064	0.206435	0.447181	-0.22357	0.136068	0.498237	-0.136246	0.314457	0.471834	0.00745787	0.443791	-0.0439466	-0.232425	0.0596415	-0.229184	0.258025	0.283099	-0.10511	-0.167891	-0.0345609	0.311272	0.301304	0.233593	0.273212
A0A2R8QLL5	A0A2R8QLL5|F1QUW4|Q7ZUW2	hyou1	54	33	39.7	496.36	DANRE	113359	Hypoxia up-regulated protein 1	NA	-0.0763788	0.748014	0.824883	-0.0312855	0.902862	0.960366	-0.158566	0.539172	0.853549	-0.203659	0.397527	0.55182	-0.110314	0.334374	-0.0487737	-0.272595	-0.373296	-0.308042	0.0847662	0.116322	0.458262	-0.132495	0.188022	0.183427	0.510802	-0.133869	0.700057
Q4FE55	Q4FE55	usp9	43	38	17	496.34	DANRE	293836	Ubiquitinyl hydrolase 1	NA	-0.045985	0.582071	0.697298	-0.14653	0.120021	0.331325	0.0497751	0.58128	0.870446	0.15032	0.0881668	0.206069	0.137798	0.100244	0.287986	0.112325	0.000448007	0.397069	0.222253	0.0636295	0.204413	0.0878234	0.108159	-0.0342738	0.126381	0.112446	0.0994562
Q6AZC1	Q6AZC1	psmc5	68	34	78.8	495.18	DANRE	45802.4	Proteasome (Prosome, macropain) 26S subunit, ATPase, 5	SUBCELLULAR LOCATION: Cytoplasm {ECO:0000256|ARBA:ARBA00004496}.	0.511448	0.000962733	0.0095658	0.37802	0.0122348	0.0823574	0.050082	0.705758	0.92154	0.18351	0.150803	0.291893	0.0377253	0.313211	0.0170308	-0.31124	0.135782	-0.193201	0.598961	0.260018	-0.0296814	-0.451683	0.273221	0.323702	-0.165047	0.246694	0.0258043
A0A0G2KCK6	A0A0G2KCK6	spata5	2	2	5.3	32.71	DANRE	77824.4	Uncharacterized protein	NA	0.844323	0.00107889	0.0102892	0.75244	0.00428988	0.0426234	0.246246	0.277867	0.67703	0.338129	0.117007	0.246248	-0.0601655	0.00553024	0.016677	-0.816324	0.114706	-0.980643	0.596105	0.0386977	-0.67975	-0.954066	0.268598	0.271932	-0.676068	0.00473366	-0.60994
B3DFV8	B3DFV8	coch	67	25	58.7	493.58	DANRE	60965.5	Coagulation factor C homolog, cochlin (Limulus polyphemus)	NA	0.435485	0.656578	0.757418	-0.221928	0.833326	0.926899	-1.67204	0.129989	0.485791	-1.01463	0.308471	0.465829	-1.69899	0.858531	-1.72786	0.249467	1.1461	1.05939	-3.31341	-1.235	-2.5709	0.0283395	-2.20224	1.0902	-1.36417	0.148356	0.206508
Q7T2P2	Q7T2P2	cct3	85	37	64	492.82	DANRE	60852.1	T-complex protein 1 subunit gamma	SUBCELLULAR LOCATION: Cytoplasm {ECO:0000256|ARBA:ARBA00004496}.	0.277494	0.0738101	0.164362	0.0151932	0.922911	0.968102	-0.465452	0.00993228	0.128552	-0.203151	0.177972	0.324941	0.0414903	0.428528	-0.0838755	-0.0958381	-0.300491	-0.300773	0.045145	0.470373	-0.0253095	-0.160197	0.0245755	0.307295	0.211645	0.34792	0.488527
O42363	O42363	apoa1	161	32	80.5	492.05	DANRE	30255.8	Apolipoprotein A-I	SUBCELLULAR LOCATION: Secreted.	0.667515	0.115755	0.22368	-1.60672	0.00244232	0.0311605	-0.898989	0.0557517	0.319979	1.37524	0.00418383	0.0257569	1.10462	-0.304976	1.77703	-0.234558	0.0739707	-0.0923331	-0.66713	0.834935	1.11275	-0.0734533	-1.30044	0.0448677	-0.91401	0.496333	-0.376879
Q7T3B1	Q7T3B1	psmc2	68	31	64.6	491.36	DANRE	49102.5	26S proteasome AAA-ATPase subunit RPT1	SUBCELLULAR LOCATION: Cytoplasm {ECO:0000256|ARBA:ARBA00004496}.	0.719195	0.000518236	0.00656019	0.456154	0.0183775	0.106791	-0.0857655	0.620261	0.888585	0.177276	0.27774	0.434468	0.0260637	0.479623	-0.0699037	-0.490765	0.134987	-0.322948	0.576021	0.386299	-0.180028	-0.680392	0.247341	0.339674	-0.178031	0.415265	0.0932698
A0A0R4IJT8	A0A0R4IJT8|Q7ZU96	cct8	68	31	59.3	490.9	DANRE	61484.3	CCT-theta	SUBCELLULAR LOCATION: Cytoplasm, cytoskeleton, cilium basal body {ECO:0000256|ARBA:ARBA00004120}.	0.326584	0.0368506	0.102191	0.0645973	0.676724	0.846838	-0.331807	0.0475309	0.292945	-0.0698207	0.626864	0.747733	0.00398898	0.332716	0.0751029	-0.131851	-0.179659	-0.326008	0.126074	0.386914	0.039614	-0.277956	0.0919005	0.356853	0.104124	0.301833	0.377664
Q6AZA0	Q6AZA0	acat1	94	28	64.5	489.58	DANRE	44626.9	Acetyl-CoA acetyltransferase, mitochondrial	SUBCELLULAR LOCATION: Mitochondrion {ECO:0000250|UniProtKB:P24752}.	0.724591	0.000696768	0.00780725	0.783211	0.000692731	0.0139007	0.206963	0.262188	0.661743	0.148343	0.380619	0.537171	0.0353375	0.0797245	-0.262422	-0.198163	0.556139	-0.305176	0.189143	0.369141	-0.707873	-0.522757	0.67425	0.283006	-0.699267	0.332989	-0.413317
Q66I16	Q66I16	etfdh	60	21	52.5	487.69	DANRE	69556.9	Electron transfer flavoprotein-ubiquinone oxidoreductase	NA	0.853128	0.000823502	0.00863248	0.782202	0.00280095	0.0330126	0.226588	0.305172	0.700463	0.297514	0.154089	0.2964	0.180035	0.180805	-0.0589746	-0.288667	0.687007	-0.490215	0.122252	0.318691	-0.697415	-0.609886	0.737422	0.33847	-0.855727	0.317922	-0.502345
Q8JHI0	Q8JHI0	slc25a5	141	17	77.5	487.11	DANRE	32990.8	Solute carrier family 25 alpha, member 5	SUBCELLULAR LOCATION: Membrane {ECO:0000256|ARBA:ARBA00004141}; Multi-pass membrane protein {ECO:0000256|ARBA:ARBA00004141}.	0.908948	0.00141834	0.0122696	0.693885	0.0135145	0.0879318	-0.0512761	0.835822	0.958473	0.163787	0.478695	0.627412	0.311716	0.229098	-0.39967	-0.157888	0.353938	-0.50373	0.0919153	0.290859	-0.921618	-0.510372	0.500825	0.508872	-0.88805	0.438512	-0.61214
Q6NX10	Q6NX10	slc25a4	44	13	69.1	447.97	DANRE	32915.8	Solute carrier family 25 (Mitochondrial carrier adenine nucleotide translocator), member 4	SUBCELLULAR LOCATION: Membrane {ECO:0000256|ARBA:ARBA00004141}; Multi-pass membrane protein {ECO:0000256|ARBA:ARBA00004141}.	0.769407	0.0220064	0.071535	0.225888	0.491549	0.718914	-0.199691	0.542303	0.855156	0.343828	0.265562	0.422513	0.656241	0.168116	-0.33101	0.275709	0.235924	0.140795	0.110305	0.519174	-0.732863	-0.260781	0.131306	0.13898	-0.962223	0.609208	-0.694855
B0S730	B0S730|A0A2R8Q8A0	slc25a6	2	2	44.9	237.64	DANRE	32991.7	Solute carrier family 25 (Mitochondrial carrier adenine nucleotide translocator), member 6	SUBCELLULAR LOCATION: Membrane {ECO:0000256|ARBA:ARBA00004141}; Multi-pass membrane protein {ECO:0000256|ARBA:ARBA00004141}.	0.297899	0.159949	0.279555	-0.0370622	0.866249	0.94024	-0.120931	0.584678	0.871301	0.21403	0.303564	0.460597	0.67055	-0.0317737	0.370107	0.0787602	-0.133012	-0.29978	0.444335	0.415473	-0.0547258	-0.0702583	0.0921034	0.463714	-0.185316	0.174213	0.00684475
E7EXC4	E7EXC4	serpinb14	90	16	70	486.37	DANRE	49057.7	Serpin peptidase inhibitor, clade B (ovalbumin), member 14	NA	0.559144	0.00168598	0.013621	-0.240241	0.139846	0.360739	0.24957	0.12634	0.477376	1.04895	5.48848e-06	0.000366342	0.883669	0.0476855	0.770434	-0.552242	0.217869	0.295719	0.32523	0.128523	0.279701	-0.68443	0.40832	0.116022	-0.45024	-0.0219507	-0.279385
F8W475	F8W475	serpinb1l4	8	7	61.6	359.13	DANRE	48479	Serpin peptidase inhibitor, clade B (ovalbumin), member 1,-like 4	NA	0.242173	0.182182	0.305177	0.930463	0.000246465	0.00736517	0.865015	0.000460343	0.0243291	0.176725	0.322343	0.479131	-0.0485998	-0.13506	-0.385919	-0.203531	0.736176	-0.0050389	0.909433	-0.484369	-0.373729	-0.128543	0.535815	-0.170196	-0.686659	0.23813	-0.501453
F1R9A9	F1R9A9	serpinb1l1	8	6	46.6	280.55	DANRE	43571.2	Serpin peptidase inhibitor, clade B (ovalbumin), member 1,-like 1	NA	-0.321217	0.179062	0.302507	-0.0882478	0.723574	0.873396	0.268518	0.291518	0.687544	0.0355486	0.877448	0.926012	0.223536	-0.403164	0.375763	-0.183341	0.137009	-0.670872	-0.301143	-0.312997	0.396832	-0.155221	0.143336	-0.340023	0.421875	-0.0456177	0.0997521
A4QPA0	A4QPA0	me3	79	29	54.7	485.8	DANRE	67367.4	Malic enzyme	NA	0.963964	8.38594e-05	0.00231233	0.330645	0.0963725	0.28885	-0.302599	0.124858	0.475302	0.330719	0.0749037	0.183747	0.377866	0.510553	0.056332	-0.365999	-0.0585365	-0.524101	0.33835	0.530218	-0.206672	-0.365915	0.489691	0.685868	-0.549271	0.509762	-0.338267
A0A0R4IKF0	A0A0R4IKF0	apoa1b	345	29	78.5	485.28	DANRE	30196.2	Apolipoprotein A-Ib	SUBCELLULAR LOCATION: Secreted {ECO:0000256|ARBA:ARBA00004613}.	0.383073	0.187469	0.310588	0.0496203	0.86998	0.942445	0.114998	0.70509	0.921047	0.448451	0.127399	0.261266	0.0558723	-0.210189	0.53114	0.096304	0.559265	0.616743	-0.329843	0.596794	-0.172293	-0.0172295	0.693036	-0.0142756	-0.710698	0.397621	-0.130716
Q6TEN9	Q6TEN9|F1QNY5	cpne1	63	31	51.2	484.88	DANRE	59840.8	Copine I	NA	-0.0251687	0.847066	0.897593	0.0178368	0.899261	0.958677	0.109757	0.441328	0.800143	0.0667518	0.610599	0.733853	0.24002	0.20309	0.23892	-0.195648	0.0363017	0.120177	0.28615	-0.112119	-0.0586131	-0.0705114	0.136436	0.123062	0.250874	-0.0412109	0.288781
B8A5K2	B8A5K2|A0A0R4IHK8|F8W4L2|F8W3N5|A8WHQ8|A8WHQ7|A0A0G2KGI2	itga6b	61	35	36.5	481.87	DANRE	121576	Integrin, alpha 6b	SUBCELLULAR LOCATION: Membrane {ECO:0000256|ARBA:ARBA00004479, ECO:0000256|RuleBase:RU003762}; Single-pass type I membrane protein {ECO:0000256|ARBA:ARBA00004479, ECO:0000256|RuleBase:RU003762}.	0.108285	0.193068	0.316556	-0.145842	0.110792	0.316457	0.0396207	0.649473	0.898268	0.293748	0.00259973	0.0187755	0.302844	0.128157	0.400882	0.0126346	0.154523	0.320393	0.229219	0.0334344	0.164657	-0.0482873	0.0703135	0.0910514	-0.0330154	0.194282	0.0824511
A0A0G2KZ18	A0A0G2KZ18	LOC100001114	47	30	32	480.28	DANRE	129943	Microtubule-associated protein	SUBCELLULAR LOCATION: Cytoplasm, cytoskeleton {ECO:0000256|RuleBase:RU000686}.	0.688972	0.00081265	0.00854697	0.302764	0.10047	0.296448	-0.08874	0.612704	0.884479	0.297469	0.083243	0.197991	0.19854	0.27123	0.132369	-0.428756	0.0453102	-0.383429	0.55201	0.364926	-0.196512	-0.494627	0.124198	0.577416	-0.334467	0.103412	-0.181056
F1QXP5	F1QXP5|K7DYA3|Q5RIH2|A0A2R8Q1M2	mthfd1b	55	35	44.5	479.93	DANRE	101432	C-1-tetrahydrofolate synthase, cytoplasmic	NA	-0.843814	0.00033204	0.00513526	-0.265502	0.181693	0.417624	-0.297144	0.138333	0.501089	-0.875456	0.000241235	0.00388241	-0.227886	0.0740363	-0.210457	0.370776	-0.390886	-0.5572	-0.422595	-0.416082	0.14691	0.491781	-0.6195	-0.0283673	0.95805	-0.351651	0.832583
Q5RKM3	Q5RKM3|F1QJA4	stip1	71	35	50	478.41	DANRE	62180.7	Stress-induced phosphoprotein 1	NA	-0.0259552	0.842561	0.894367	-0.00983105	0.944433	0.977918	-0.127419	0.373955	0.753246	-0.143543	0.282882	0.439355	0.100795	0.167948	0.0319428	-0.0194154	0.0170827	-0.0663007	0.109556	0.138081	0.123953	-0.127879	-0.0133386	0.181324	0.389356	0.173391	0.522503
A8E7M5	A8E7M5|A0A2R8Q8U5|A0A2R8QTM1	cand2	57	5	29.9	477.88	DANRE	138618	Cullin-associated and neddylation-dissociated 2 (putative)	NA	0.33291	0.0106151	0.0435821	-0.0869167	0.483028	0.71346	-0.049375	0.68831	0.913785	0.370452	0.0055733	0.0311158	0.408708	0.129478	0.225568	-0.000400256	-0.0214325	0.266314	0.241886	0.252337	-0.0183962	-0.215929	0.180442	0.0474752	-0.294151	0.302738	-0.0891313
Q5TYZ5	Q5TYZ5	cand1	39	26	27.9	443.42	DANRE	137951	Cullin-associated and neddylation-dissociated 1	NA	0.0221314	0.892672	0.929589	-0.269575	0.144998	0.367773	-0.030764	0.862181	0.969295	0.260942	0.12899	0.263677	0.341849	0.253917	0.369591	-0.227489	0.0535802	0.252834	0.123999	0.0437898	0.541882	-0.228933	0.143314	0.140644	0.348809	0.112563	0.570002
B3DIV6	B3DIV6	dlat	95	24	45	475.99	DANRE	69662.2	Acetyltransferase component of pyruvate dehydrogenase complex	SUBCELLULAR LOCATION: Mitochondrion matrix {ECO:0000256|RuleBase:RU361137}.	0.71837	0.00118108	0.0108714	0.468321	0.0266439	0.13308	0.303585	0.128938	0.483004	0.553634	0.00712839	0.0369062	0.345369	0.0468286	0.201826	-0.268311	0.578909	-0.201716	0.147812	0.409669	-0.05159	-0.538201	0.898659	0.23548	-0.759674	0.260857	-0.354461
A0A2R8QQY8	A0A2R8QQY8|Q6P603	anxa2a	104	32	63.2	475.97	DANRE	39776	Annexin	SUBCELLULAR LOCATION: Membrane {ECO:0000256|ARBA:ARBA00004370}. Secreted, extracellular space, extracellular matrix, basement membrane {ECO:0000256|ARBA:ARBA00004302}.	0.520878	0.180316	0.303575	-0.152342	0.70748	0.864046	0.110312	0.785559	0.94658	0.783532	0.0529959	0.146107	0.280557	0.64604	0.821875	-0.61597	-0.0631289	-0.108515	0.996097	-0.487299	0.669626	-1.12938	-0.142337	0.508489	-0.0377316	-0.0543014	0.312498
F1QGT0	F1QGT0|A0A2R8Q4T4|A0A2R9YJK7|A0A2R8Q6F9|F8W277|A0A0R4INF0|F8W2U9|A0A0R4IVZ9|A0A0R4IWB1|A8DU70	nexn	54	35	38.4	475.95	DANRE	102153	Nexilin (F actin-binding protein)	NA	1.0117	0.00236173	0.0165321	0.790547	0.0172818	0.104167	-0.143185	0.62899	0.890812	0.0779635	0.775625	0.851496	-0.400852	0.0377819	-0.501923	-0.176707	-0.162091	-0.321917	0.707948	0.666688	-0.969282	-0.125958	0.180304	0.409762	-1.10957	0.426724	-1.09359
F1R6L6	F1R6L6|B8JLQ3|E9QB18	ncl	67	30	36.8	475.41	DANRE	75174.1	Nucleolin	SUBCELLULAR LOCATION: Cytoplasm {ECO:0000256|ARBA:ARBA00004496}. Nucleus, nucleolus {ECO:0000256|ARBA:ARBA00004604}.	0.115281	0.259981	0.392292	0.359964	0.0047698	0.0449411	0.218773	0.0591629	0.328844	-0.0259103	0.795297	0.864487	-0.0400578	-0.00810334	-0.124279	-0.258936	0.168973	-0.21977	0.202836	-0.0862403	-0.149014	-0.254492	0.308242	0.147872	-0.0105776	-0.0218849	0.0945265
F1QNB1	F1QNB1|A0A2R8RUP4|A0A2R8RN38|F1QNB3|A0A2R8Q5E4|A0A2R8PY77|F8W480|F8W5B5|A0A2R8Q3Z4|A0A2R8QF85|F8W572	ank3a	50	31	10.2	473.91	DANRE	458312	Ankyrin 3a	SUBCELLULAR LOCATION: Cytoplasm, cytoskeleton {ECO:0000256|ARBA:ARBA00004245}. Membrane {ECO:0000256|ARBA:ARBA00004370}.	0.502281	0.000733165	0.00804453	0.267913	0.0488434	0.194913	-0.0755915	0.549895	0.857576	0.158777	0.18725	0.337125	0.0629359	0.274913	0.0543858	-0.0261532	0.390369	-0.300323	0.138154	0.482011	0.124591	-0.350506	0.231407	0.251842	-0.223247	0.306841	-0.0936116
A2BIB9	A2BIB9|A0A0R4IYL7|A2BIC1|A2BIB8	ank2b	18	16	8.1	304.82	DANRE	390674	Ankyrin 2b, neuronal	SUBCELLULAR LOCATION: Cytoplasm, cytoskeleton {ECO:0000256|ARBA:ARBA00004245}. Membrane {ECO:0000256|ARBA:ARBA00004370}.	-0.024292	0.865342	0.909211	-0.0893663	0.565919	0.778098	-0.151931	0.334974	0.725337	-0.086857	0.547006	0.682222	0.527563	0.0789243	0.160657	0.300619	-0.0730917	-0.264848	0.0867142	0.232046	0.0746495	0.355042	0.0917945	0.175368	0.11238	0.261942	0.0774079
A0A0R4IN28	A0A0R4IN28|F1QYU5|E7F0U4|A0A2R8QT49|A0A2R8Q894|A0A2R8PYS3	ank1a	3	3	5.6	164.2	DANRE	215952	Ankyrin 1, erythrocytic a	SUBCELLULAR LOCATION: Cytoplasm, cytoskeleton {ECO:0000256|ARBA:ARBA00004245}. Membrane {ECO:0000256|ARBA:ARBA00004370}.	0.0301864	0.853403	0.901639	-0.0536134	0.761523	0.892903	-0.0723697	0.682518	0.911077	0.0114302	0.944187	0.966528	0.0693455	0.0696007	0.636214	-0.0972604	-0.136534	-0.111568	0.196317	0.337988	-0.041191	0.0745759	0.193978	0.0605011	0.291243	0.159736	0.238522
E7F4G7	E7F4G7	ank2a	10	4	2.6	161.04	DANRE	540835	Ankyrin 2a, neuronal	SUBCELLULAR LOCATION: Cytoplasm, cytoskeleton {ECO:0000256|ARBA:ARBA00004245}. Membrane {ECO:0000256|ARBA:ARBA00004370}.	-0.742392	0.0173123	0.060727	-0.670834	0.0399922	0.171926	0.0947554	0.752033	0.936939	0.023197	0.933292	0.959935	-0.101115	-0.666522	-0.0742641	0.617752	-0.114158	0.763083	-0.677885	-0.513306	0.136931	0.698376	-0.676982	-0.752062	-0.230262	-0.40583	-0.454019
F8W268	F8W268|F8W3U7|A0A2R8QIP1|A0A2R8QCC3|F8W5I3	ank3b	13	8	19.5	149.18	DANRE	60445.8	Ankyrin 3b (Fragment)	NA	0.750004	3.22467e-05	0.00138763	0.29034	0.0437383	0.1812	-0.411997	0.00744565	0.111565	0.0476669	0.698144	0.799443	-0.0567526	0.495984	-0.00713658	-0.348431	-0.103253	-0.400881	0.347783	0.493194	-0.289562	-0.285997	0.0607415	0.55668	-0.288773	0.509159	-0.0217986
B8JK17	B8JK17|B8JK16|A0A0R4IFR3	ank1a	7	5	47.3	155.71	DANRE	19531.8	Ankyrin 1, erythrocytic a	NA	1.13689	0.000610298	0.00727539	0.0817439	0.768906	0.89711	0.45926	0.115967	0.460892	1.51441	4.69531e-05	0.00134371	0.615175	-0.372655	0.133626	-0.781806	0.3839	0.411393	0.80853	0.135277	0.116605	-0.952427	0.0104007	0.463759	-1.4021	-0.459644	-1.64451
A0A2R8RQY1	A0A2R8RQY1|F1QV17|A0A2R8RK64|A0A2R8RHX4	ank1b	2	2	3.9	77.35	DANRE	195961	Ankyrin 1, erythrocytic b	SUBCELLULAR LOCATION: Cytoplasm, cytoskeleton {ECO:0000256|ARBA:ARBA00004245}. Membrane {ECO:0000256|ARBA:ARBA00004370}.	0.828686	0.00239277	0.0166366	-0.0741995	0.75963	0.891508	0.820491	0.00434259	0.0800602	1.72338	3.06135e-06	0.000265918	0.400001	-0.251155	0.607344	-1.00048	0.75758	1.1369	0.598766	-0.0697071	0.581709	-0.996075	0.465524	0.336273	-1.22306	-0.868216	-0.947926
F1QFC2	F1QFC2|F1R886	cfb	62	26	44.8	469.22	DANRE	86320.4	Complement factor B	SUBCELLULAR LOCATION: Secreted {ECO:0000256|ARBA:ARBA00004613}.	0.140024	0.56721	0.684538	0.467486	0.0929532	0.282694	0.809522	0.00789511	0.114793	0.482061	0.0645919	0.165687	0.271124	-0.0340264	0.178113	-0.634564	0.0757442	0.507339	1.18251	-0.333226	-0.377554	-0.513734	0.57847	-0.0572598	-0.133731	-0.364612	-0.0671932
Q6DHC4	Q6DHC4|E7F463	bfb	15	11	26.3	191.13	DANRE	52300.9	Complement component bfb	SUBCELLULAR LOCATION: Secreted {ECO:0000256|ARBA:ARBA00004613}.	-1.37885	0.0129514	0.0499927	0.625315	0.24774	0.496028	2.29457	0.000686	0.0290041	0.290404	0.554135	0.688165	0.429571	-1.2528	0.0705922	0.989369	1.22661	-0.0521594	-0.16231	-2.27174	-0.0304222	-1.28522	1.12483	-0.633338	-0.0442004	-2.10157	-0.403983
A0A2R8QKR9	A0A2R8QKR9|F1QFT0	cfbl	8	7	10.9	93.92	DANRE	85732.7	Complement factor b,-like	SUBCELLULAR LOCATION: Secreted {ECO:0000256|ARBA:ARBA00004613}.	-1.74574	0.0651243	0.151438	-0.249144	0.794062	0.907724	0.349094	0.714902	0.924707	-1.1475	0.208001	0.361946	-2.08641	-2.00472	-1.67266	1.1852	-0.0433033	1.90265	-1.70903	-1.76329	-2.28381	0.995858	-2.10028	-1.78624	-0.342928	-0.978934	-1.38837
E7FE90	E7FE90	fetub	90	24	52.5	468.14	DANRE	57548	Fetuin B	SUBCELLULAR LOCATION: Secreted {ECO:0000256|ARBA:ARBA00004613}.	0.759549	0.0304028	0.0891009	-0.17263	0.61737	0.810549	0.0475311	0.890087	0.974608	0.979709	0.00797141	0.0397879	0.595362	-0.00252388	1.25789	-0.488529	0.0965346	-0.653606	0.58953	0.326909	0.555903	-0.181254	0.112707	0.443232	-0.780382	0.107287	-0.713125
Q7ZVF3	Q7ZVF3	sdha	70	27	54.6	467.07	DANRE	73103.3	Succinate dehydrogenase [ubiquinone] flavoprotein subunit, mitochondrial	SUBCELLULAR LOCATION: Mitochondrion inner membrane {ECO:0000250|UniProtKB:Q0QF01}; Peripheral membrane protein {ECO:0000250|UniProtKB:Q0QF01}; Matrix side {ECO:0000250|UniProtKB:Q0QF01}.	1.33344	0.000398416	0.00565269	0.759679	0.026673	0.13308	0.0928116	0.764663	0.941139	0.66657	0.0340562	0.107547	0.363776	0.314153	0.110538	-0.829436	0.179768	-0.906515	0.514988	0.624348	-0.324154	-1.1919	1.01702	0.712586	-1.10821	0.26003	-0.293092
Q804G7	Q804G7	anxa4	62	28	75.3	466.5	DANRE	35975.7	Annexin	NA	0.0316197	0.819466	0.877166	-0.208524	0.178805	0.413193	-0.0438909	0.769442	0.941937	0.196253	0.172213	0.318647	0.147038	0.323639	0.215135	-0.140691	-0.0897191	0.1929	0.262477	-0.238787	0.396674	-0.011475	-0.0845197	0.233986	0.135374	-0.0256229	0.183528
A0JMN2	A0JMN2|F1QSB0	A0JMN2	82	24	48.4	465.99	DANRE	72179.1	Zgc:154046	NA	0.715323	0.00046325	0.00619159	0.746502	0.000615585	0.0129707	0.393707	0.0338704	0.2456	0.362529	0.0346894	0.10884	0.143734	-0.0246251	-0.156028	-0.244678	0.668561	-0.168655	0.28137	0.339614	-0.41217	-0.561907	0.844735	0.204566	-0.695337	0.298504	-0.541312
Q642H6	Q642H6|A2CF48	crata	49	22	41	395.77	DANRE	71887.7	Carnitine O-acetyltransferase a	NA	0.434624	0.00767846	0.0355192	0.603294	0.00139524	0.0213874	0.397785	0.0192527	0.186323	0.229115	0.120215	0.250342	0.254089	-0.015405	-0.0719981	-0.178953	0.522739	-0.290972	0.274025	0.116023	-0.364489	-0.437894	0.658091	0.105041	-0.264203	0.143008	-0.508781
Q6DI20	Q6DI20|E9QGM5	dpp3	46	30	42.6	464.06	DANRE	83016.6	Dipeptidyl peptidase 3	NA	-0.237827	0.0972835	0.198767	0.114609	0.43933	0.67913	0.16593	0.268963	0.668141	-0.186506	0.184414	0.333438	-0.0444543	-0.0458567	0.0103378	-0.100332	-0.00747997	-0.155541	0.0767219	-0.259259	-0.142789	-0.200915	0.0252493	-0.175301	0.212223	-0.0573143	0.502603
A0A140LH30	A0A140LH30|Q7SXN5|F1Q917|F1QB59|F6P2T1	dnm1l	50	31	48.5	462.16	DANRE	80028.3	Dynamin-1-like protein	SUBCELLULAR LOCATION: Cytoplasm, cytosol {ECO:0000256|ARBA:ARBA00004514}. Cytoplasmic vesicle, secretory vesicle, synaptic vesicle membrane {ECO:0000256|ARBA:ARBA00004432}. Endomembrane system {ECO:0000256|ARBA:ARBA00004184}; Peripheral membrane protein {ECO:0000256|ARBA:ARBA00004184}. Golgi apparatus {ECO:0000256|ARBA:ARBA00004555}. Membrane {ECO:0000256|ARBA:ARBA00004170}; Peripheral membrane p…	0.366548	0.000700587	0.00782245	0.17914	0.0665086	0.234686	0.0813858	0.379048	0.757141	0.268794	0.00643602	0.0344977	0.0955516	0.085419	-0.0287353	-0.0324143	0.280348	0.0849203	0.143952	0.186637	0.0329373	-0.215058	0.251625	0.140837	-0.31612	0.162798	-0.326911
Q7T3G4	Q7T3G4|A7MCL3	pgam2	187	24	85.4	461.94	DANRE	28995	Phosphoglycerate mutase	NA	0.630048	0.00371512	0.0217757	0.42625	0.0454175	0.185682	0.412462	0.0517652	0.306245	0.61626	0.00430507	0.0261981	0.332025	0.0723822	0.431126	-0.543638	0.206545	-0.0728708	0.794142	0.281091	0.138173	-0.696308	0.899402	0.144174	-0.343836	0.385958	-0.0528043
B8A4H6	B8A4H6	pgam1b	18	8	62.2	260.05	DANRE	29015.7	Phosphoglycerate mutase	NA	-0.172634	0.432517	0.564408	0.00349208	0.988125	0.99386	0.0366148	0.876048	0.971909	-0.139511	0.524119	0.664554	0.087434	0.189909	0.0148211	-0.2674	0.0800385	0.0603898	0.0148848	0.0161598	0.25192	-0.210491	0.226477	0.040636	0.548547	0.0353693	0.901954
Q7SZR4	Q7SZR4	pgam1a	12	4	47.6	206.26	DANRE	29139.8	Phosphoglycerate mutase	NA	-0.323181	0.27498	0.408783	-0.173878	0.579812	0.786436	-0.589538	0.0765879	0.375945	-0.738841	0.0219249	0.0802737	-0.237486	0.770933	-0.252791	0.111934	-0.315696	-0.0552831	-0.351358	-0.144219	-0.0903141	-0.0881009	-0.331485	0.294742	0.854498	0.105314	1.44116
F1R1R7	F1R1R7	f13a1b	73	37	43.8	461.73	DANRE	84287.9	Coagulation factor XIII, A1 polypeptide b	NA	0.217014	0.3515	0.486622	0.566423	0.0363973	0.160833	0.732021	0.0100066	0.128633	0.382612	0.112371	0.23935	0.407407	0.0579648	0.179489	-0.539082	-0.0866679	-0.131116	1.10506	-0.181766	-0.116715	-0.330751	0.935177	-0.212503	-0.240468	0.0129784	-0.0810804
F1Q6F0	F1Q6F0|F8W2U7|F8W2A8|F8W5J8|A0A2R8RQN8	phkb	57	34	28.4	461.42	DANRE	125429	Phosphorylase b kinase regulatory subunit	SUBCELLULAR LOCATION: Cell membrane {ECO:0000256|ARBA:ARBA00004342, ECO:0000256|RuleBase:RU364123}; Lipid-anchor {ECO:0000256|ARBA:ARBA00004342, ECO:0000256|RuleBase:RU364123}; Cytoplasmic side {ECO:0000256|ARBA:ARBA00004342, ECO:0000256|RuleBase:RU364123}. Membrane {ECO:0000256|ARBA:ARBA00004423}; Lipid-anchor {ECO:0000256|ARBA:ARBA00004423}; Cytoplasmic side {ECO:0000256|ARBA:ARBA00004423}.	0.362177	0.0142071	0.0530632	0.45819	0.00561716	0.0502376	0.722275	0.000168879	0.0160258	0.626262	0.000301044	0.00442905	0.336113	-0.101944	0.079443	-0.0936359	0.708159	0.183379	0.430707	-0.0166174	0.181986	-0.648523	0.821396	-0.0815407	-0.62765	-0.0753176	-0.354315
B0S754	B0S754	snrnp200	41	35	18.3	459.65	DANRE	245464	Activating signal cointegrator 1 complex subunit 3	NA	-0.148599	0.0778777	0.170374	-0.00634459	0.94078	0.977148	0.13017	0.144457	0.507561	-0.0120842	0.878574	0.926533	0.0591614	-0.046137	0.0896836	-0.0293978	-0.00948585	0.150768	0.0635119	-0.0780138	0.087492	0.13318	0.217269	-0.0174301	0.152004	-0.0173717	0.179656
A0A2R8QK17	A0A2R8QK17	LOC795051	47	41	12.8	458.75	DANRE	400493	PDZ domain-containing protein	NA	0.325386	0.064755	0.150928	0.221173	0.226156	0.470336	0.234304	0.201335	0.596361	0.338516	0.0559215	0.151318	0.22958	-0.184988	0.118243	-0.150157	0.0821926	0.104842	0.529186	0.129126	-0.0369684	-0.158947	0.363914	0.597138	-0.333285	-0.178102	-0.29598
E7F983	E7F983	akap12a	35	30	15	458.24	DANRE	323308	A kinase (PRKA) anchor protein 12a	SUBCELLULAR LOCATION: Membrane {ECO:0000256|ARBA:ARBA00004635}; Lipid-anchor {ECO:0000256|ARBA:ARBA00004635}.	0.226686	0.0834795	0.178078	0.288327	0.0459173	0.187363	0.170135	0.215095	0.610904	0.108493	0.385571	0.541267	-0.0377924	0.147038	0.204744	-0.34358	0.185871	-0.175932	0.211683	0.00111217	-0.228656	-0.231271	0.2892	0.220977	-0.157073	-0.133994	0.0603144
A2BIM7	A2BIM7|A0A2R8QDW5|A0A2R8QSD2|A0A2R8QF48|A0A2R8QS44|A0A2R8RVT1|A0A2R8QAT8|A0A2R8QLE0|A0A2R8PXY1	tars1	42	26	43.4	456.96	DANRE	83871	Threonyl-tRNA synthetase	NA	0.313393	0.0357053	0.100227	0.216085	0.158344	0.385221	0.0322658	0.826521	0.956677	0.129573	0.349865	0.507548	0.159037	0.158328	0.107752	-0.321256	0.0953479	-0.347719	0.358688	0.249589	0.12378	-0.299295	0.226357	0.215175	0.0364069	0.155034	0.108701
A0A0R4ISX2	A0A0R4ISX2|B8JMZ8	tars3	6	6	27.7	153.76	DANRE	50886.3	Threonyl-tRNA synthetase	NA	0.398336	0.0101642	0.0423808	0.237814	0.120277	0.331465	-0.227747	0.135301	0.497149	-0.0672253	0.619941	0.742127	-0.248652	0.263283	-0.1283	-0.0837356	-0.139294	-0.129272	0.234381	0.212717	-0.512755	0.0580226	-0.14588	0.119071	-0.27066	0.248192	-0.453706
Q7ZU42	Q7ZU42|A0A0R4ICN9|E9QI77|A0A2R8RWK0	ola1	57	30	74.7	456.89	DANRE	45243.1	Obg-like ATPase 1	SUBCELLULAR LOCATION: Cytoplasm {ECO:0000255|HAMAP-Rule:MF_03167}. Nucleus {ECO:0000255|HAMAP-Rule:MF_03167}. Nucleus, nucleolus {ECO:0000255|HAMAP-Rule:MF_03167}. Note=Predominantly cytoplasmic, shuttles between the nucleus and the cytoplasm. {ECO:0000255|HAMAP-Rule:MF_03167}.	0.058453	0.699624	0.78944	-0.0541552	0.74049	0.88202	-0.635506	0.00163955	0.048363	-0.522898	0.00377536	0.0240116	0.0572565	0.418791	-0.0373686	0.175666	-0.504168	-0.243578	0.0929512	0.485384	-0.482417	0.258793	-0.280829	0.231816	0.450401	0.483305	0.500624
A0A0R4IKG8	A0A0R4IKG8	si:ch211-217a12.1	69	27	69.2	454.74	DANRE	55416.8	Si:ch211-217a12.1	NA	0.0257035	0.909888	0.942277	-0.503592	0.0567447	0.21405	0.476307	0.0695455	0.355979	1.0056	0.000601591	0.00696111	0.955074	-0.272186	0.80913	-0.137542	0.345871	1.17235	-0.0753881	0.214083	0.30717	-0.46228	0.651532	-0.549509	-0.307479	-0.0682613	0.128613
A2BII1	A2BII1|Q6NYL5|Z4YIZ9	gpt2l	20	14	34.5	257.68	DANRE	63294.4	Alanine aminotransferase 2-like (Fragment)	NA	-0.259096	0.493979	0.619826	-0.184772	0.649829	0.832942	-1.34956	0.00487932	0.0864376	-1.42388	0.00198715	0.0157703	-0.941449	-0.546282	-1.29545	0.86316	-0.441373	-1.50059	-1.61058	0.414736	-0.366835	0.729253	-1.58061	0.79647	0.176056	-0.110111	-0.177271
E7FD91	E7FD91	ddx6	57	19	68.3	454.49	DANRE	54308.7	RNA helicase	NA	-1.57416	0.102077	0.204918	-0.75108	0.450756	0.687742	-0.509796	0.606523	0.882206	-1.33288	0.160153	0.304595	-1.23354	-1.28142	-1.20454	-1.44609	-1.52852	-1.13093	-1.41075	-1.41339	0.444738	-1.41492	-1.65716	0.324133	2.31771	-1.71872	2.75054
E7F1G8	E7F1G8	ddx61	10	7	37.2	230.86	DANRE	54750.5	RNA helicase	NA	-0.268748	0.455885	0.586099	0.133758	0.728872	0.876664	0.0872388	0.820898	0.956144	-0.315266	0.383697	0.539593	-0.176307	-0.0600982	-0.127315	-0.460842	-0.269181	-0.591919	0.00754704	-0.230897	0.500514	-0.485171	0.366636	0.296214	0.640698	-0.214171	1.17135
F1QJE0	F1QJE0|X1WD83	uqcrc2a	73	25	53.2	454	DANRE	49473.3	Ubiquinol-cytochrome c reductase core protein 2a	NA	0.948245	0.000228261	0.00409333	1.01159	0.000254526	0.00747199	0.397016	0.0718581	0.361399	0.333667	0.0986081	0.219935	0.195222	0.0842892	-0.272408	-0.314442	0.731124	-0.58665	0.425849	0.450734	-0.509133	-0.837587	0.998078	0.381629	-0.825193	0.368688	-0.530416
F1QHR0	F1QHR0	apoa4b.1	118	7	78	453.33	DANRE	29505.9	Apolipoprotein A-IV b, tandem duplicate 1	SUBCELLULAR LOCATION: Secreted {ECO:0000256|ARBA:ARBA00004613}.	0.364709	0.130194	0.243105	-0.412513	0.114534	0.321782	-0.715951	0.0116681	0.138057	0.0612714	0.790192	0.861225	0.169256	0.177393	0.567116	0.114664	0.0516349	0.00364601	-0.835799	0.69916	-0.208983	0.294591	-0.0550983	0.144146	-0.172548	0.724088	0.0492429
B3DHC5	B3DHC5|E9QJQ2|E9QCH4	apoa4b.2	8	2	77.6	434.54	DANRE	29440.8	Apolipoprotein A-IV b, tandem duplicate 2	SUBCELLULAR LOCATION: Secreted {ECO:0000256|ARBA:ARBA00004613}.	0.741353	0.00753465	0.0351359	-0.528454	0.0570811	0.214905	-0.579548	0.0394582	0.264529	0.690259	0.0114373	0.0514696	0.51974	0.204156	0.989761	-0.37987	0.134399	-0.173949	-0.370555	0.81634	0.652561	-0.32715	0.141877	0.361865	-0.135232	0.810127	0.0693273
F1QJD1	F1QJD1	apoa4b.2	9	4	77.6	426.81	DANRE	29342.8	Apolipoprotein A-IV b, tandem duplicate 2	SUBCELLULAR LOCATION: Secreted {ECO:0000256|ARBA:ARBA00004613}.	-0.246505	0.189734	0.313032	-1.10547	7.11602e-05	0.00365506	-0.22594	0.261299	0.661666	0.633028	0.00359027	0.0234607	0.914738	-0.244284	1.08353	0.219273	-0.365787	0.21543	-0.232019	-0.100469	0.830027	0.359119	-0.435819	-0.2874	-0.158738	0.157747	0.0919578
E9QB46	E9QB46|Q6PHD9|A0A286Y9S7	selenbp1	58	27	62.7	450.36	DANRE	53261.6	Methanethiol oxidase	NA	0.0113372	0.924287	0.952678	-0.0293711	0.819843	0.919785	0.287781	0.0405652	0.267984	0.328489	0.014973	0.0619333	0.229652	0.0467561	0.437985	-0.219036	0.144078	0.201947	0.540306	-0.0765674	0.223416	-0.121761	0.047254	0.00280736	0.0182035	-0.148604	0.101637
F8W315	F8W315|Q5RHD8|F1R7G1	F8W315	42	28	25.8	447.23	DANRE	153121	Palladin, cytoskeletal-associated protein	NA	0.775261	2.60566e-06	0.000324021	0.662092	2.96885e-05	0.00204597	-0.166333	0.138219	0.501089	-0.0531632	0.594546	0.721396	-0.201915	0.451357	-0.255505	-0.242204	0.193349	-0.522352	0.421271	0.520523	-0.471522	-0.215079	0.283185	0.35141	-0.391238	0.539113	-0.390119
Q9I8U8	Q9I8U8|A0A2R8QB55|E9QBF1	tnnc2	466	21	81.2	446.25	DANRE	18267.8	Fast skeletal muscle troponin C	NA	-0.97786	2.1858e-06	0.000287247	-1.43098	7.10797e-08	6.90918e-05	0.0221002	0.868219	0.971381	0.47522	0.00176781	0.0146407	1.27843	-0.367002	1.03669	0.539944	-0.409307	0.973665	-0.516969	-0.251515	0.887686	0.439027	-0.234313	-0.638353	0.498216	-0.378983	0.798398
A0A2R8QMW7	A0A2R8QMW7|E9QFE7	A0A2R8QMW7	17	6	48.1	137.04	DANRE	18099.5	Uncharacterized protein	NA	0.788827	0.000360749	0.00534549	0.533276	0.0102853	0.07425	0.529507	0.0107113	0.131823	0.785058	0.000375758	0.00509223	0.216222	-0.170577	0.211354	-0.758355	0.580705	0.063933	0.510418	0.48509	-0.0219259	-0.933484	0.860893	0.240231	-0.685952	-0.0700859	-0.292859
E7F8T6	E7F8T6|A0A2R8QPL7|A0A2R8QA72|A0A2R8RK56|A0A2R8QAG1|A0A2R8QPJ3|F1QN57|A0A2R8Q5I4|A0A2R8RP41|A0A2R8Q6V5|A0A2R8QCY7|A0A2R8Q9N8|A0A2R8Q2G9|A0A2R8Q321|A0A2R8QDY8|A0A2R8QPH8|A0A2R8RWC0|A0A2R8QHB8|A0A0G2KDZ8|A0A2R8Q4W0|F1QBJ5|A0A2R8S0I0|A0A2R8QLU8|A0A2R8QJA1|A0A2R8Q9D7|A0A2R8QD84|A0A2R8Q0M1	nampt1	55	29	61.8	446.05	DANRE	56272.8	Nicotinamide phosphoribosyltransferase	SUBCELLULAR LOCATION: Nucleus {ECO:0000256|PIRNR:PIRNR005943}. Cytoplasm {ECO:0000256|PIRNR:PIRNR005943}. Secreted {ECO:0000256|PIRNR:PIRNR005943}.	-0.20633	0.164114	0.284608	0.20035	0.207724	0.448325	0.390954	0.0226841	0.202281	-0.0157263	0.912174	0.945457	0.0174375	-0.00444689	0.00717446	-0.120676	0.111927	0.233739	0.139396	-0.362974	-0.0582873	-0.0637965	0.499774	-0.131574	0.0123878	-0.0633564	0.435053
A5D6S3	A5D6S3	mut	54	26	39.6	445.73	DANRE	84086.7	Methylmalonyl-CoA isomerase	NA	0.162586	0.11746	0.22583	0.32876	0.00791253	0.0618107	0.0742842	0.490416	0.827984	-0.0918896	0.360346	0.518133	-0.1552	0.189591	-0.0939415	0.0443357	0.159768	-0.0575628	0.118608	0.217656	0.0381686	-0.117315	0.506502	0.14946	0.0323071	0.19266	0.139695
Q6NUZ3	Q6NUZ3|F6NN54|R4GE62	syncrip	57	5	46	445.55	DANRE	70247.3	Synaptotagmin-binding, cytoplasmic RNA-interacting protein	NA	0.411111	0.00403505	0.0230336	0.326668	0.0234694	0.124002	-0.227016	0.0976488	0.423011	-0.142572	0.247373	0.402926	-0.00712737	0.388414	-0.0697316	-0.197428	-0.0289095	-0.31406	0.236749	0.359959	-0.341555	-0.226939	0.222808	0.390172	0.0598902	0.343715	0.202291
A0A0R4IHZ5	A0A0R4IHZ5|A0A0R4ITI5|A0A0R4ITR2|F6PBZ5|A0A0R4IHN8	hnrnpr	28	18	39.7	395.57	DANRE	71412.4	Heterogeneous nuclear ribonucleoprotein R	NA	0.293277	0.0053209	0.027891	0.130898	0.189922	0.427814	-0.0466641	0.630026	0.890886	0.115715	0.209374	0.363685	0.193966	0.231404	0.150158	-0.107841	0.0828875	-0.0370547	0.25575	0.264803	-0.0934655	-0.129188	0.21426	0.27405	-0.0593612	0.153596	0.0471336
F1QY96	F1QY96|R4GF20|R4GEE9	syncrip	2	2	38.4	376.55	DANRE	70286.6	Synaptotagmin-binding, cytoplasmic RNA-interacting protein	NA	0.0294882	0.723944	0.807324	0.0561624	0.53557	0.754445	0.0380472	0.673424	0.90602	0.011373	0.891417	0.934448	-0.107682	0.00271161	0.0836643	-0.0663581	0.112228	0.132477	-0.0122939	0.0269054	-0.0503766	0.0976892	0.112115	0.0749706	0.068759	0.0259549	-0.0875004
Q6NYJ5	Q6NYJ5|X1WH05	syncripl	17	14	37.6	307.37	DANRE	63236.1	Synaptotagmin-binding, cytoplasmic RNA-interacting protein,-like	NA	0.0451412	0.798048	0.861485	0.136785	0.476805	0.708226	-0.104776	0.584206	0.871301	-0.19642	0.276451	0.433582	0.0845962	0.308106	0.145569	-0.169821	-0.079822	-0.201503	0.187561	0.237351	-0.0437169	-0.145305	0.291326	0.265098	0.440929	0.140635	0.644821
A0A0R4IEP3	A0A0R4IEP3|Q6ZM50|A0A2R8Q153	capza1b	75	14	78	444.58	DANRE	36205.7	F-actin-capping protein subunit alpha	NA	-0.0566974	0.792385	0.856829	-0.755381	0.00568571	0.0504946	-0.122433	0.600244	0.879434	0.57625	0.0173215	0.0684357	1.17705	0.205228	0.9244	0.0372231	-0.301114	0.198216	0.144571	0.23735	0.670444	-0.18674	0.117987	0.0283165	0.197661	-0.0325687	0.616971
Q6NWK1	Q6NWK1|F8W5D9	capza1a	23	11	80.4	322.78	DANRE	32941.2	F-actin-capping protein subunit alpha	NA	-0.08808	0.361998	0.497463	-0.257745	0.0239222	0.125054	0.0600035	0.561427	0.862471	0.229668	0.0286544	0.0958827	0.49743	0.137834	0.420198	0.10097	-0.0115979	0.2891	0.264431	0.100604	0.41303	0.0293744	0.188751	0.0951996	0.227374	0.015126	0.343366
A8KC30	A8KC30|A0A0R4IFE2|A0A2R8QG90|F8W3U0	psmc1a	61	3	72	444.3	DANRE	49315.7	Proteasome (Prosome, macropain) 26S subunit, ATPase, 1a	SUBCELLULAR LOCATION: Cytoplasm {ECO:0000256|ARBA:ARBA00004496}.	0.522516	0.00585466	0.0296668	0.139718	0.428905	0.669544	-0.10115	0.564534	0.86477	0.281648	0.0990172	0.220692	0.14265	0.403762	0.167142	-0.405609	-0.0601413	-0.110088	0.577918	0.27707	0.0983754	-0.465912	0.124937	0.331494	-0.152105	0.249224	0.195114
F1QGH9	F1QGH9	psmd11b	40	17	63.2	444.14	DANRE	47861.4	26S proteasome non-ATPase regulatory subunit 11B	SUBCELLULAR LOCATION: Nucleus {ECO:0000250}. Cytoplasm, cytosol {ECO:0000250}.	0.661702	0.000354195	0.00531041	0.386073	0.0222599	0.120435	-0.10393	0.496628	0.82992	0.1717	0.234164	0.3887	0.0600279	0.428213	-0.0224957	-0.340558	0.139745	-0.2033	0.534552	0.436432	-0.131837	-0.605316	0.260718	0.429203	-0.129564	0.368558	0.0910348
F6P3G4	F6P3G4	psmd11a	15	11	52	318.39	DANRE	47658	26S proteasome non-ATPase regulatory subunit 11A	SUBCELLULAR LOCATION: Nucleus {ECO:0000250}. Cytoplasm, cytosol {ECO:0000250}.	-0.127165	0.552264	0.671705	-0.015719	0.945386	0.977918	-0.050503	0.825955	0.956677	-0.161949	0.451053	0.603529	-0.0603759	0.22794	0.106008	-0.309224	-0.114704	-0.0802358	0.0641957	-0.00604135	0.243456	-0.172995	0.15999	0.14457	0.551207	-0.0184809	0.787659
F1QU55	F1QU55|A0A2R8PWR1|Q32LQ4	bhmt	83	22	71.5	444.12	DANRE	44709.2	Betaine--homocysteine S-methyltransferase 1	NA	-0.0896378	0.785562	0.851629	0.124359	0.726992	0.8754	-0.46089	0.209087	0.60494	-0.674887	0.05695	0.153017	0.00597793	0.0988739	-0.175881	0.85515	-0.706531	-0.680187	0.411489	0.633142	-0.652451	0.791887	-0.458788	-0.166571	-0.0143503	0.273009	-0.435682
A0A0R4II89	A0A0R4II89|A0A0R4IGK9|Q9PT92	cat	55	29	61.4	442.67	DANRE	59986.4	Catalase	SUBCELLULAR LOCATION: Peroxisome {ECO:0000256|ARBA:ARBA00004275}.	-0.984867	0.000809798	0.00854532	0.00888239	0.971565	0.987224	-0.557956	0.0401625	0.266772	-1.55171	1.25002e-05	0.000591523	-0.981256	-0.206209	-0.86363	0.629639	-0.779541	-1.42778	-1.13591	-0.632786	-0.598725	0.898559	-0.961451	0.12382	0.512512	-0.888866	0.294718
Q2MJQ8	Q2MJQ8|Q2MJQ9	smyd1b	72	26	62.3	442.02	DANRE	55306.3	Histone methyltransferase SmyD1b	NA	1.14902	2.39283e-06	0.000303506	0.458458	0.0111335	0.0779084	0.337693	0.0482695	0.294918	1.02826	7.78829e-06	0.000431051	0.328886	0.25163	0.378569	-0.755513	0.303658	-0.00284996	1.00894	0.379259	0.14384	-0.97944	0.699113	0.44703	-0.878508	0.253586	-0.65113
A0A2R8QFM8	A0A2R8QFM8|A8DZ95|F1QR62	dpysl2b	50	19	53.5	441.12	DANRE	62305.3	Dihydropyrimidinase-related protein 2	NA	0.459026	0.00327285	0.0203295	0.204006	0.162155	0.389922	-0.10421	0.462314	0.815365	0.15081	0.257744	0.413656	0.155351	0.347749	0.235683	-0.230985	0.0218945	-0.133905	0.462744	0.328654	-0.175961	-0.266941	0.188254	0.427974	-0.0968156	0.209651	0.0726658
A0A2R8Q6T7	A0A2R8Q6T7	dpysl2a	4	3	18.6	151.59	DANRE	63404	Dihydropyrimidinase-related protein 2	NA	0.859496	0.0162185	0.0581117	0.0390223	0.909235	0.962353	-0.33727	0.333509	0.724018	0.483204	0.144252	0.284064	0.53954	0.422169	0.653197	-0.537766	-0.372045	-0.764877	0.347158	0.566611	0.00672777	-0.684268	0.467895	0.820465	-0.47525	0.130512	0.199057
Q6NYV1	Q6NYV1	psmd3	51	31	51.2	440.98	DANRE	58035.2	Proteasome (Prosome, macropain) 26S subunit, non-ATPase, 3	NA	0.538422	0.00110676	0.0103986	0.446884	0.00689242	0.0573528	-0.00943235	0.946954	0.987708	0.0821061	0.53476	0.673602	-0.0507255	0.324453	-0.0871523	-0.340488	0.0840187	-0.419651	0.529468	0.248938	-0.143687	-0.454592	0.201254	0.2247	-0.270333	0.325958	0.0357731
F1R9Y5	F1R9Y5|Q6P3H6	pck2	50	24	43.3	438.42	DANRE	70518.6	Phosphoenolpyruvate carboxykinase (GTP)	NA	-1.14345	0.00235531	0.0165263	-0.139383	0.676833	0.846838	-0.514992	0.139446	0.50191	-1.51905	0.000245307	0.00390214	-0.976656	-0.788091	-0.999999	1.17295	-0.832804	-0.94169	-1.24685	-0.510913	-0.93091	1.27726	-1.22544	-0.499992	0.270242	-0.547822	-0.493491
F1QYH3	F1QYH3	pck1	4	2	5.8	53.43	DANRE	70632.4	Phosphoenolpyruvate carboxykinase (GTP)	NA	-1.17356	0.00412128	0.0233785	-0.378001	0.318053	0.572908	-0.238635	0.523506	0.847305	-1.03419	0.00908305	0.0437324	-0.629479	-1.15673	-1.00164	0.803494	-0.928426	-0.523317	-1.36468	-0.86311	-0.989292	1.18401	-1.19869	-0.861569	-0.209265	-0.819782	-0.785216
A0A0R4IUS0	A0A0R4IUS0|K7DY09|A0A0R4IMZ0|A0A0R4IMJ6|A0A0R4IDW8|A0A0R4IER6|A0A0R4IE81|L7N0X1|A0A2R8QB35|F6P5X8|E9QJG9|A0A2R8QRH9|A0A0G2KGY3|F1QBP8|F1QF37|A0A2R8QRN8|A0A0R4IUL2|A0A0R4IL40|A0A0R4IUB8|A0A0R4IG99|A0A0R4IX62|A0A0R4IZB5|A0A0R4IYC3|A0A0R4IT83|E7EXN3|A0A2R8PW28|A0A2R8QCJ9|A0A2R8QTC1|A0A0R4IMQ1|A0A0R4IAQ6|A0A2R8QBZ5|A0A2R8QP01|A0A0R4ITG0|A0A2R8QAK4|A0A2R8RIL7|A0A2R8Q8A9|A0A2R8RMF5|A0A2R8QGN8|A0A2R8QQ4…	A0A0R4IUS0	72	6	24	438.29	DANRE	141229	Si:dkey-261j11.2	NA	0.289558	0.0698291	0.158616	0.224994	0.178611	0.412999	0.45481	0.013145	0.146432	0.519374	0.00364663	0.0235952	0.457128	-0.0786286	0.32425	-0.123794	0.286173	-0.176348	0.425835	-0.0549868	0.134066	-0.174415	0.517295	-0.0908824	-0.680035	0.0443284	-0.360158
A0A0H2UKI8	A0A0H2UKI8|A0A2R8QN13|A0A0R4IAU9|A0A0R4IQQ1|F1Q912|A0A2R8RLF6|A0A2R8QIT3|A0A2R8QHD0|A0A0N4STY0|A0A2R8Q1C8|A0A2R8Q0X0|F1QC83|A0A2R8Q2R9|A0A0R4ID75|A0A2R8RYI3|A0A2R8Q640|E9QIY5|A0A2R8Q6G8|A0A0R4IJ46|K7DYG7|E9QIK7|A0A0G2KKH8|A0A2R8QEC3|A0A2R8RK90|A0A0R4IT54|A0A2R8QND9|F1QEN0|F1R303|E7FEF0	A0A0H2UKI8	2	2	20.6	386.48	DANRE	130012	Zgc:174944 (Fragment)	NA	-0.594153	0.329511	0.464907	-0.194478	0.784018	0.905018	-0.722974	0.332339	0.723796	-1.12265	0.0980184	0.219004	NA	0.990198	NA	NA	NA	-0.229001	-0.503374	NA	-0.388792	NA	NA	-0.550999	0.541626	NA	1.08588
A0A0R4INV7	A0A0R4INV7|A0A0R4IK57|A0A0R4I9I6|A0A2R8QNA5|A0A2R8QD08|A0A0R4IST4|A0A2R8RV53|A0A2R8QFT8|A0A2R8QDX2|E7F5Y2|E7F6H1|E9QD05|A0A2R8QL67|A0A2R8PXY9|A0A2R8PYV2|F1QEJ0|A0A2R8QHN8|A0A2R8QPK3|A0A2R8Q2L8|A0A2R8RT15|A0A2R8Q4H2|A0A2R8QAF7|A0A2R8QA08|A0A2R8Q691|A0A2R8QSH1|A0A2R8QI33|F1R088|A0A0G2L9E1|A0A2R8RW67|E7EYN9|A0A0R4ITD5|A0A2R8QBR3|H0WE40|A0A0R4IYC5|A0A2R8Q3Z5|E7F4S5|A0A1L1QZJ2|X1WC24|E7F7P5|E7F9E3|A0A…	A0A0R4INV7	3	3	25.5	373.46	DANRE	130629	Si:dkey-71l4.5	NA	-0.506894	0.00654046	0.031932	-1.12195	1.72911e-05	0.00152282	-0.30035	0.0990635	0.425912	0.314708	0.0656542	0.167435	0.78571	0.0137104	0.722815	0.298306	-0.144349	0.848785	-0.583529	0.11312	0.630144	0.18238	-0.397389	-0.500826	0.559905	0.075039	0.688031
F1Q7D8	F1Q7D8|A0A2R8Q908|R4GE52	F1Q7D8	2	2	17.6	364.06	DANRE	158406	Si:ch211-127b6.2	NA	-0.154357	0.592219	0.705422	0.172286	0.580076	0.786626	-0.034563	0.911097	0.981067	-0.361205	0.221377	0.376027	-0.363233	-0.433618	-0.591411	-0.0293745	-0.563167	0.0430647	-0.624265	-0.138743	-1.2988	0.368172	0.0465044	-0.270045	-0.480473	-0.54058	-0.623883
F1R5Y0	F1R5Y0|A0A0G2KV92|A0A1L1QZD9|A0A0R4IHB9|A0A0G2L081|R4GEZ5|A0A0R4ILC1|F6NI41	F1R5Y0	4	3	17.7	302.44	DANRE	117324	Si:dkey-16p6.1	NA	0.632282	0.088031	0.184559	-0.362192	0.345547	0.595736	0.740364	0.0669423	0.34799	1.73484	0.000226291	0.00367926	0.929608	-0.23105	0.804882	-1.38324	0.423114	0.502346	0.797687	-0.0739963	1.52487	-1.12526	0.513903	0.661508	-0.340258	-1.00498	-0.328885
A0A0R4IWV7	A0A0R4IWV7	A0A0R4IWV7	2	2	14.6	281.63	DANRE	141666	Si:ch211-171l17.14	NA	1.42723	0.0973861	0.198912	0.0821868	0.925518	0.969272	-1.40521	0.127404	0.478837	-0.0601636	0.941072	0.965058	-1.53268	1.42572	-0.357203	-2.13506	-0.77127	-2.06212	-1.15807	1.30641	0.991227	-1.65773	-0.0446844	1.2279	0.350361	-0.971229	0.722314
A0A0A0MPR4	A0A0A0MPR4|F6NI48|F1QBC5|A0A2R8RS62|A0A0R4IW07|A0A0A0MPV2|F1R9Q9|F1QP35|F6P427|F1R3B6|F6NKM9|A0A0A0MPM8|A0A0A0MPS3|A0A0R4IRX1|A0A0R4IU43|A0A0A0MPT9|F1R570|E9QDN8|A0A0R4IBW4|X1WC97|E9QI03|F6PEQ5|F6NNU9|F1QY47|B3DK63|I3IS03|E7F9L3|A0A0J9YJK8	A0A0A0MPR4	2	2	15.5	272.99	DANRE	116615	Si:ch211-15j1.4	NA	0.645914	0.0182967	0.0632701	1.01672	0.00174423	0.0248543	0.104004	0.693649	0.916292	-0.266805	0.284739	0.441126	-0.369721	0.330183	-0.499437	-0.442372	0.314678	-0.00425891	0.342565	0.282013	-1.49957	-0.170707	0.613188	0.438081	-0.458149	0.227614	-0.234537
A0A2R8QNF4	A0A2R8QNF4|A0A2R8QFS6|A0A2R8RP53|F1QPY4|A0A2R8RM17|F1Q5P9|A0A0R4IPY5|A0A0G2KV54	A0A2R8QNF4	3	3	7.9	114.46	DANRE	100799	NACHT domain-containing protein	NA	-0.450816	0.0148825	0.0549982	-0.369224	0.0529795	0.204843	-0.0264942	0.880801	0.972948	-0.108086	0.512242	0.653678	0.0869983	0.0884762	0.132446	0.48093	-0.0405407	0.688349	-0.201973	-0.101696	0.265342	0.500542	0.0146926	-0.329344	0.580573	0.144779	0.0434352
F6NX52	F6NX52|A0A2R8Q8W6|A0A2R8Q912|A0A2R8QI44|A0A2R8RLD7	F6NX52	5	5	3.9	100.6	DANRE	339651	Si:ch211-213a13.5	NA	-3.08842	0.00849474	0.0377531	-1.53424	0.177177	0.411682	0.252355	0.817994	0.955526	-1.30183	0.213566	0.368044	-0.794499	-3.21719	-1.84285	1.30231	-1.70183	1.41164	-1.95234	-2.71298	-2.55962	2.50252	-3.78755	-3.60653	-0.654524	-1.39501	-1.72833
A0A0R4II23	A0A0R4II23|A0A0R4IM97|A0A0R4IWL2|A0A0R4ILC4	A0A0R4II23	2	2	9	120.36	DANRE	130587	Si:dkey-3h2.2	NA	-1.29807	0.070649	0.159564	-0.240078	0.741131	0.88202	-0.307279	0.672852	0.905997	-1.36528	0.0588546	0.156019	-1.67174	-0.380496	-1.13983	0.136407	1.13817	0.0171586	-2.06202	-1.30369	-0.22797	-0.117561	-2.06318	-0.934627	1.22932	-0.134767	1.19056
F1QYL1	F1QYL1	F1QYL1	5	3	2.1	90.02	DANRE	444019	Si:ch211-11p18.6 (Fragment)	NA	-0.604271	0.036554	0.101589	-0.35116	0.231608	0.477137	-0.0912757	0.749377	0.935726	-0.344387	0.20663	0.360451	0.197811	-0.145212	0.47742	0.111547	-0.480874	0.255792	0.358765	-0.0610289	-0.374754	0.0566383	-0.514168	-0.202908	1.08931	-0.0741194	0.676317
F1R4J1	F1R4J1	si:ch211-156p11.1	2	2	4.4	82.83	DANRE	166204	Si:ch211-156p11.1 (Fragment)	NA	-0.0559456	0.808347	0.869713	-0.278312	0.27496	0.528501	-0.131404	0.599479	0.879255	0.0909625	0.693866	0.796056	0.422288	0.120988	0.558591	0.0617129	-0.263998	0.0869635	0.249148	-0.26948	-0.0889339	-0.190437	-0.0859058	0.577893	0.692098	-0.0381255	0.0516852
B0S8F7	B0S8F7	si:ch211-250k18.6	2	2	5.4	78.16	DANRE	154645	Si:ch211-250k18.6 (Fragment)	NA	0.0518585	0.876968	0.917474	-0.162386	0.654714	0.835509	-0.207088	0.569417	0.867046	0.00715661	0.982947	0.990759	1.21482	0.267137	0.62931	-0.0385415	-0.301067	-0.58192	0.403902	0.441019	-0.277528	-0.0171564	0.148518	0.104531	0.403261	0.350804	0.608494
A0A0R4IJI2	A0A0R4IJI2|E7FAH2	si:dkey-190j3.2	2	2	10.4	102.22	DANRE	121984	Si:dkey-190j3.2	NA	-0.341495	0.433845	0.565326	0.165591	0.722718	0.873239	-0.039254	0.932806	0.984841	-0.546341	0.218961	0.373424	0.225311	-0.15965	-0.581277	0.322603	0.0976496	0.588228	0.406418	-0.38005	-1.64678	0.498765	-1.06818	-0.0795494	0.0997161	0.0241127	-0.15024
A0A0R4IWC4	A0A0R4IWC4|A0A2R8Q8E0|A0A0R4IYS5|A0A0G2KR36|A0A2R8QD91|A0A0R4IWV0|A0A0R4IKK5|E9QI02|A0A0R4IAY1|A0A2R8QL57	si:ch211-66c13.1	4	2	4.8	60.57	DANRE	122744	Si:ch211-66c13.1	NA	1.64203	0.0708373	0.159876	-1.06161	0.25974	0.511494	-0.969782	0.301242	0.697001	1.73386	0.0581575	0.155013	1.46765	0.642351	1.5841	-2.44093	-1.59491	-2.25293	0.250261	0.824383	1.69135	-1.73236	0.0274347	0.546929	-0.513816	0.109175	0.241824
A8HAK4	A8HAK4|A8HAK6|F6NQ84|A0A2R8RTJ7|A0A0G2L9D7|A0A0G2KXK3	nlrc9	8	4	4.3	43.25	DANRE	120008	NLR family CARD domain-containing 9 (Fragment)	NA	0.298011	0.892372	0.92945	-2.91147	0.234235	0.479744	-2.23922	0.354768	0.737981	0.970259	0.660682	0.772665	-1.11617	2.14913	-0.385022	-6.22617	-4.53181	-3.89078	-2.46343	-4.50911	1.62328	-5.90046	-4.56568	0.0600245	2.21956	-4.15773	2.25734
R4GE51	R4GE51|E7FG82	R4GE51	3	3	4.7	38.16	DANRE	107632	Si:ch211-181d7.1	NA	-1.85032	0.0491972	0.124257	-0.359921	0.702037	0.860612	-0.297163	0.75188	0.936939	-1.78756	0.0562393	0.151663	-1.95587	-1.95224	-1.55873	1.70267	-0.176601	-0.159211	-2.29013	-1.4301	-1.81595	2.28574	-2.73035	-1.65967	-0.24011	-0.698779	-2.08781
E7F3U2	E7F3U2|F1QGE7|A5PF24|A0A2R8QSY5	si:ch211-196h16.5	3	3	4.7	43.36	DANRE	111947	Si:ch211-196h16.5	NA	0.521704	0.180755	0.303829	0.550502	0.190327	0.428422	0.469597	0.259579	0.660719	0.440799	0.25335	0.410133	0.111804	-0.151113	0.397709	0.0651341	0.383309	-0.705658	0.709533	-0.00651952	0.158985	0.359061	0.530795	0.815081	-0.977342	-0.370988	-1.24721
E7FA88	E7FA88	E7FA88	2	2	2.4	23.25	DANRE	111430	Si:ch211-181d7.3	NA	0.0444435	0.882381	0.921618	0.621242	0.0729921	0.249629	0.483302	0.152922	0.521413	-0.0934969	0.755968	0.837805	0.137127	-0.0623999	0.239749	0.415236	0.697285	-0.387019	-0.0264078	-0.405435	-0.896048	0.195031	0.513206	-0.0476787	-0.748757	0.161085	-0.393713
E7F4H1	E7F4H1|F1QIS3	dysf	40	32	18	438.24	DANRE	242506	Dysferlin	SUBCELLULAR LOCATION: Cytoplasmic vesicle membrane {ECO:0000256|ARBA:ARBA00004483}; Single-pass type II membrane protein {ECO:0000256|ARBA:ARBA00004483}. Membrane {ECO:0000256|ARBA:ARBA00004606}; Single-pass type II membrane protein {ECO:0000256|ARBA:ARBA00004606}.	0.100201	0.467752	0.595918	0.0761612	0.607445	0.804944	-0.189369	0.21339	0.61011	-0.16533	0.239075	0.393965	0.00930287	0.126366	-0.207826	0.0999745	-0.0547309	0.0264062	0.403958	0.185274	-0.173818	0.1351	-0.380195	0.208715	0.0510148	0.195831	0.0292947
Q5BJ17	Q5BJ17	tufm	64	26	56.6	437.16	DANRE	49700.4	Elongation factor Tu	NA	0.35922	0.0407644	0.108488	0.552245	0.00658705	0.0557657	0.23978	0.183517	0.571083	0.0467546	0.771881	0.849592	0.148339	0.0266027	-0.128404	-0.313453	0.597804	-0.119741	0.0421822	0.392671	-0.265273	-0.289143	0.742938	0.183504	-0.00644311	0.282003	0.0569415
F1QCT6	F1QCT6|F1RER9	plaa	36	27	47.2	435.06	DANRE	87666.4	Phospholipase A2-activating protein	SUBCELLULAR LOCATION: Cytoplasm {ECO:0000256|ARBA:ARBA00004496}.	0.123605	0.153082	0.270959	-0.0235746	0.792812	0.907477	0.033196	0.711862	0.922911	0.180375	0.0454007	0.131275	0.130939	0.0491743	0.0921208	0.0142613	0.0386209	0.264245	0.131149	0.150253	0.104761	-0.142475	0.203556	0.187189	-0.00313464	-0.0216322	0.00191393
A2CG95	A2CG95|A2CG94	acadm	79	26	63.8	434.77	DANRE	46806.7	Medium-chain specific acyl-CoA dehydrogenase, mitochondrial	SUBCELLULAR LOCATION: Mitochondrion matrix {ECO:0000256|ARBA:ARBA00004305}.	0.239129	0.160866	0.280664	0.0984146	0.580451	0.786967	-0.198388	0.273885	0.67334	-0.0576737	0.725471	0.818048	0.122646	0.237212	-0.0263509	-0.0252627	0.17218	-0.143282	-0.43232	0.226243	-0.242436	-0.248353	0.338317	0.285162	-0.0801229	0.149171	0.295011
A2BGW3	A2BGW3|E9QDQ2|A0A0R4IVW3|I3IT67|A0A2R8RRG1	camk2b1	63	13	50.3	434.66	DANRE	69142.2	Calcium/calmodulin-dependent protein kinase	NA	0.130097	0.377392	0.511087	-0.186064	0.247851	0.496092	0.00633043	0.967776	0.99155	0.322491	0.0414037	0.123164	0.669688	0.058964	0.368625	0.323954	0.0833484	0.486685	0.17129	0.438083	0.197392	-0.107802	0.478964	0.132568	-0.0265385	0.323199	0.242813
Q4V9P8	Q4V9P8|F1Q7Q1	camk2g1	2	2	42.3	361.75	DANRE	63327.6	Calcium/calmodulin-dependent protein kinase	NA	0.832468	0.000966155	0.0095658	0.172867	0.42809	0.668601	-0.394063	0.0851637	0.397138	0.265538	0.19795	0.350418	0.537199	0.387606	-0.336488	-0.378237	-0.178575	-0.263491	0.398002	0.591365	0.0386637	-0.533632	0.281086	0.73141	-0.183499	0.53322	0.0090994
A0A0R4IQT3	A0A0R4IQT3|F1QW17|A0A286YAD2|A0A2R8QIR1|A0A2R8PWY6	A0A0R4IQT3	4	3	35.4	332.83	DANRE	71170.9	Calcium/calmodulin-dependent protein kinase	NA	1.17525	4.18384e-06	0.000442231	0.758819	0.000563365	0.0123609	0.218024	0.213845	0.61011	0.634457	0.00126426	0.0116015	-0.0293665	0.0900341	-0.0686488	-0.550538	0.464813	-0.229214	0.467713	0.524824	-0.490646	-0.64734	0.730524	0.374792	-1.02915	0.355653	-1.12867
Q6DEH3	Q6DEH3|A0A2U3TVF6|F1RAL9|F1QL80|F1QLM0|A0A0R4IXC9	camk2d1	6	5	38	257.37	DANRE	56398.3	Calcium/calmodulin-dependent protein kinase type II delta 1 chain	NA	-0.0203971	0.862892	0.907389	-0.12786	0.325433	0.57868	0.231492	0.0873039	0.402385	0.338955	0.0119178	0.0528097	0.417157	-0.221563	0.367957	-0.183558	0.188739	0.0936716	0.183019	-0.27503	0.0947951	-0.194364	-0.0251532	-0.017792	-0.104382	0.0505557	0.100063
F1QGL7	F1QGL7|A0A0R4I9B3|Q6DGS3	camk2d2	4	3	26.3	204.06	DANRE	63040.7	Calcium/calmodulin-dependent protein kinase	NA	0.697466	0.000121828	0.0028789	0.186705	0.201909	0.442037	-0.492292	0.00365646	0.0720164	0.018469	0.887953	0.931741	-0.0868604	0.705345	-0.128565	-0.196092	-0.126893	-0.0547209	0.447657	0.593383	-0.151735	-0.327724	-0.0770598	0.519819	-0.0406867	0.475559	0.0687464
U3JAY8	U3JAY8	camk2g1	5	3	42.2	198.4	DANRE	36463.5	Calcium/calmodulin-dependent protein kinase (CaM kinase) II gamma 1 (Fragment)	NA	-0.059319	0.680175	0.774308	0.0336712	0.828075	0.92379	-0.345714	0.0407131	0.268492	-0.438704	0.0082678	0.0408303	-0.254642	0.307887	0.170351	0.157074	-0.440295	-0.273662	0.0738616	0.29672	-0.0994173	0.334501	0.124419	0.157852	0.269721	0.29771	0.536151
F1RAV5	F1RAV5|A0A2R8QDF2|F1QYQ1|A0A286YAW9|Q08CV8|E7F469|E7F164|K7DYC0|F1R2A7|E9QIU5|A0A2R8QC98|A0A2R8QG28|K7DY81|A0A0R4IZP9	rps6ka1	61	27	47.2	434.45	DANRE	85570.5	Ribosomal protein S6 kinase	NA	0.371184	0.01019	0.0424327	-0.167876	0.230016	0.475681	-0.0149432	0.912412	0.981067	0.524117	0.000978171	0.00973075	0.488318	0.165997	0.582058	-0.242556	0.0917743	0.13305	0.282687	0.328753	0.264533	-0.374387	0.22288	0.196886	-0.132368	0.164593	0.120802
A0A0R4ID09	A0A0R4ID09|B0R0M9|A0A2R8Q8Y4	rps6ka3a	18	15	31.1	298.46	DANRE	83124.8	Ribosomal protein S6 kinase	NA	-0.0226414	0.801684	0.864739	-0.243054	0.0244849	0.126725	0.321468	0.0051125	0.0883474	0.54188	3.80132e-05	0.00117889	0.55785	-0.0799534	0.480888	-0.129294	0.132352	0.20073	0.251687	-0.196163	0.463274	-0.0641976	0.163856	-0.0985411	-0.213398	-0.180686	-0.0578878
F1QRX4	F1QRX4|A0A2R8QMI5|F8W5X7|F8W278|F8W5F8	bin1b	60	24	79.6	433.89	DANRE	41082.5	Bridging integrator 1b	NA	1.71197	9.90894e-06	0.000734121	0.897282	0.00479908	0.0450829	-0.110024	0.683296	0.911585	0.70466	0.0128769	0.0553952	0.163873	0.509059	-0.167591	-1.04957	0.416088	-1.01629	0.657827	0.875084	-0.389241	-1.60552	0.560995	0.695616	-1.03864	0.540216	-0.534154
Q6DRM9	Q6DRM9|A0A2R8QCL7|E7F0X6|Q6NYA8	smc1al	45	36	32.3	433.62	DANRE	143766	Structural maintenance of chromosomes protein	SUBCELLULAR LOCATION: Chromosome {ECO:0000256|ARBA:ARBA00004286}. Nucleus {ECO:0000256|ARBA:ARBA00004123, ECO:0000256|PIRNR:PIRNR005719}.	0.129244	0.356966	0.49204	0.0987709	0.510993	0.735028	0.345575	0.0344851	0.247124	0.376048	0.0157904	0.064386	0.0606476	-0.105536	0.597335	-0.203146	0.10456	0.118777	0.241572	-0.0558729	0.151687	-0.113602	0.646516	0.121074	-0.148235	-0.0184334	-0.110763
A0A0R4ILA8	A0A0R4ILA8|F1QUQ7|A0A1D5NS51	psmc3	75	25	73.3	433.35	DANRE	48224.5	Proteasome 26S subunit, ATPase 3	SUBCELLULAR LOCATION: Cytoplasm {ECO:0000256|ARBA:ARBA00004496}.	0.438131	0.0105225	0.0433618	0.288951	0.0909891	0.279551	-0.0516782	0.749047	0.935682	0.097502	0.517153	0.658646	0.0495427	0.381544	-6.63439e-06	-0.361972	0.122915	-0.10775	0.439679	0.318827	-0.0509991	-0.476957	0.222349	0.306662	0.0563025	0.246269	0.283406
F1R2E0	F1R2E0|E9QEE4|F8W2D3	hnrnpm	58	38	49.2	429.05	DANRE	74412	Heterogeneous nuclear ribonucleoprotein M	NA	0.241581	0.0194951	0.0657997	0.327822	0.00528429	0.0482331	0.09465	0.350846	0.735072	0.00840905	0.927408	0.955899	-0.0116731	0.101107	-0.046558	-0.111179	0.0689385	-0.181722	0.173226	0.0716398	-0.343237	-0.182497	0.303909	0.069115	-0.252077	0.107636	-0.0710728
Q7SXP1	Q7SXP1	capzb	73	24	76.1	428.95	DANRE	30970.5	F-actin-capping protein subunit beta	SUBCELLULAR LOCATION: Cytoplasm, cytoskeleton {ECO:0000256|RuleBase:RU365078}.	-0.275484	0.0135218	0.0516598	-0.85861	1.74849e-06	0.000430459	0.11381	0.29385	0.688945	0.696935	7.13697e-06	0.000405191	1.10318	-0.0552567	0.822992	0.176635	-0.140055	0.772773	0.0825114	-0.139168	0.704345	0.115426	0.0341826	-0.178696	0.0777159	-0.113266	0.245775
E9QGU4	E9QGU4|Q7ZYX4|E9QD64	E9QGU4	54	30	60	428.14	DANRE	58022.2	Chaperonin-containing TCP1, subunit 6A (zeta 1)	NA	0.180308	0.265627	0.398724	-0.0237287	0.889423	0.953157	-0.396555	0.0341871	0.24666	-0.192518	0.236185	0.391132	-0.0329061	0.362764	-0.0158157	-0.0805003	-0.21269	-0.258717	0.0665007	0.340012	0.158221	-0.215007	-0.0369105	0.31862	0.369309	0.320691	0.547053
X1WCD0	X1WCD0|F1RD13	si:ch211-266g18.10	52	44	16.9	428.01	DANRE	229643	Triadin	SUBCELLULAR LOCATION: Membrane {ECO:0000256|ARBA:ARBA00004606}; Single-pass type II membrane protein {ECO:0000256|ARBA:ARBA00004606}. Sarcoplasmic reticulum membrane {ECO:0000256|ARBA:ARBA00004157}; Single-pass type II membrane protein {ECO:0000256|ARBA:ARBA00004157}.	0.0538823	0.840607	0.893286	-0.194191	0.505658	0.730548	-0.277291	0.346243	0.731724	-0.0292173	0.91311	0.945619	0.842528	0.125434	-0.173	0.200956	-0.194411	-0.233304	0.454543	0.11861	-0.268427	0.186736	-0.716858	-0.0117186	-0.161105	0.26787	0.0580794
A0A2R8RTT5	A0A2R8RTT5|F1R7F6|A0A2R8QL71	uggt1	37	30	24.6	427.09	DANRE	173786	UDP-glucose glycoprotein glucosyltransferase 1	SUBCELLULAR LOCATION: Endoplasmic reticulum lumen {ECO:0000256|ARBA:ARBA00004319}.	-0.272552	0.00720744	0.0341116	-0.0707371	0.457112	0.691778	0.0339042	0.719234	0.925808	-0.167911	0.0713631	0.177456	0.0206207	0.148761	0.0358248	0.140785	0.047493	0.18099	0.0211104	-0.0614223	0.196342	0.311164	0.0445182	-0.113885	0.354943	0.041758	0.29853
F1QUS9	F1QUS9|I3ISS5	usp7	41	32	32.7	427.01	DANRE	130414	Ubiquitin carboxyl-terminal hydrolase 7	NA	0.00506164	0.948002	0.964735	-0.0141355	0.866163	0.94024	0.0847731	0.32152	0.715302	0.10397	0.195424	0.3475	0.0818519	0.0633973	0.213385	0.0411694	0.160905	0.24345	0.119457	0.0315842	0.0661185	-0.0853113	0.130835	0.0402194	0.0939352	0.0739694	0.13913
Q8UVX0	Q8UVX0|E9QHH1|A0A0R4IWH9|A0A0J9YJF9	piwil1	46	31	37.9	426.6	DANRE	98419.6	Piwi-like protein 1	SUBCELLULAR LOCATION: Cytoplasm {ECO:0000269|PubMed:17418787}. Note=Component of the meiotic nuage, also named P granule, a germ-cell-specific organelle required to repress transposon activity during meiosis. {ECO:0000269|PubMed:17418787}.	-2.20462	0.0108043	0.0441385	-0.943829	0.259105	0.511037	-0.72333	0.382162	0.759913	-1.98412	0.0190545	0.0732169	-1.80866	-1.97822	-1.7695	0.0440654	-0.722073	0.196005	-2.52772	-2.03831	-0.553758	-0.500326	-2.53363	-0.271692	2.03996	-0.529683	2.41687
F1QDQ1	F1QDQ1|A0A286Y8Z3	copa	45	33	27.3	426.27	DANRE	139835	Coatomer subunit alpha	SUBCELLULAR LOCATION: Cytoplasm {ECO:0000256|PIRNR:PIRNR003354}. Golgi apparatus membrane {ECO:0000256|ARBA:ARBA00004255, ECO:0000256|PIRNR:PIRNR003354}; Peripheral membrane protein {ECO:0000256|ARBA:ARBA00004255, ECO:0000256|PIRNR:PIRNR003354}; Cytoplasmic side {ECO:0000256|ARBA:ARBA00004255}. Membrane {ECO:0000256|ARBA:ARBA00004287}; Peripheral membrane protein {ECO:0000256|ARBA:ARBA00004287}; …	-0.2163	0.191269	0.314567	-0.0641399	0.711042	0.866905	0.0546942	0.751897	0.936939	-0.0974656	0.545025	0.680348	0.0185857	0.155497	0.149487	-0.125657	-0.0481486	-0.00500774	0.119271	-0.0937664	0.355735	-0.0234598	0.125558	0.0752874	0.433819	-0.0935545	0.62396
B0V234	B0V234	fhl2b	52	10	86	426.02	DANRE	34380.3	Four and a half LIM domains 2b	SUBCELLULAR LOCATION: Nucleus {ECO:0000256|ARBA:ARBA00004123}.	0.506039	0.0134467	0.0514347	0.848858	0.000679712	0.0137701	0.257224	0.200965	0.596361	-0.0855952	0.636162	0.75437	0.093735	0.282305	-0.0773313	-0.340223	0.33503	-0.691728	0.62358	0.0819207	-0.678226	-0.302568	0.5728	0.451968	-0.371797	0.196791	0.00341761
Q6AZB7	Q6AZB7|B0S7I4	fhl2a	16	8	81.3	389.62	DANRE	34444.3	Four and a half LIM domains 2a	SUBCELLULAR LOCATION: Nucleus {ECO:0000256|ARBA:ARBA00004123}.	0.113287	0.418429	0.550784	0.144702	0.341112	0.593413	0.0552194	0.712125	0.922911	0.0238048	0.863287	0.914026	0.186527	0.30685	0.316081	-0.0882329	0.0469921	-0.0790964	0.395827	-0.0909561	-0.178377	0.100592	0.175137	0.236454	-0.0806717	0.150716	0.218227
F1RA03	F1RA03	vimr1	93	22	89.8	425.77	DANRE	27146.1	Vimentin-related 1	NA	0.726217	0.0191124	0.0648879	0.138836	0.643257	0.83045	-0.226318	0.453445	0.808024	0.361063	0.205964	0.359587	0.469601	0.390193	0.465897	-0.323852	0.252948	-0.337289	0.573108	-0.0303025	-0.28514	-0.285348	-0.174744	1.16548	-0.493464	0.248314	-0.0285165
F1QQQ5	F1QQQ5	gsnb	56	28	38.3	424.66	DANRE	80708.5	Actin-depolymerizing factor	NA	0.255712	0.0686594	0.157084	0.11758	0.412988	0.656659	0.679749	0.000307419	0.0196935	0.817881	2.68669e-05	0.000981177	0.71048	-0.122023	0.587333	-0.387525	0.551511	0.223556	0.592323	-0.136459	0.256811	-0.634155	0.54254	-0.152883	-0.381718	-0.0591335	-0.0899484
F1REN0	F1REN0	cul5a	45	7	38.2	424.05	DANRE	91582.3	Cullin 5a	NA	0.173342	0.118462	0.227044	-0.0658429	0.566418	0.778257	-0.0228842	0.841142	0.960079	0.2163	0.0573314	0.153716	0.327719	0.122477	0.258009	0.112126	0.0867702	0.36937	0.217809	0.320091	-0.0261882	0.0256146	0.194574	0.0256477	-0.0743741	0.28886	0.000341504
Q6DHU6	Q6DHU6	tnni2a.3	293	19	72.7	423.81	DANRE	19846.7	Troponin I type 2a (skeletal, fast), tandem duplicate 3	NA	-1.19932	4.11369e-05	0.00158115	-1.46611	1.19254e-05	0.00129315	-0.0385799	0.858963	0.968107	0.228211	0.267837	0.425333	1.313	-0.22751	1.16061	0.606114	-0.665376	0.382927	-0.442181	-0.610821	0.992641	0.442816	-0.403893	-0.70677	0.859895	-0.315846	1.02751
A0A2R8RX09	A0A2R8RX09|Q0D2W2	A0A2R8RX09	28	12	49	268.32	DANRE	24252.7	Troponin I type 2a (skeletal, fast), tandem duplicate 4	NA	-1.80081	5.73729e-05	0.00193542	-1.29611	0.00180984	0.0255595	0.707365	0.0523033	0.308826	0.202658	0.519768	0.660796	1.31666	-0.940631	1.01085	0.86329	-0.739834	1.45031	-0.587396	-1.3036	-0.0351586	0.451834	0.245909	-1.30107	0.675391	-0.725922	0.941517
F8W3J9	F8W3J9	tnni2a.2	25	12	55.6	177.31	DANRE	20890	Troponin I type 2a (skeletal, fast), tandem duplicate 2	NA	0.515572	0.00774942	0.0356912	0.631818	0.00344918	0.0378997	0.440021	0.027258	0.221915	0.323775	0.0695803	0.173967	0.106165	-0.10996	-0.0713704	-0.21613	0.532028	-0.0937344	0.350164	0.422597	-0.512121	-0.341425	0.584966	-0.0207123	-0.741727	-0.0957972	-0.566876
Q5RGU1	Q5RGU1|A0A0R4I9G5	coq8a	60	21	48.9	423.57	DANRE	69349.6	Atypical kinase COQ8A, mitochondrial	SUBCELLULAR LOCATION: Mitochondrion {ECO:0000250|UniProtKB:Q8NI60}. Membrane {ECO:0000255}; Single-pass membrane protein {ECO:0000250|UniProtKB:Q8NI60, ECO:0000255}.	0.311529	0.186911	0.309825	0.717238	0.0109534	0.0773445	0.18	0.469185	0.817852	-0.225709	0.331066	0.48832	0.0494066	0.19421	-0.177185	-0.183918	0.424368	-0.674291	0.143094	0.24747	-0.379797	-0.515708	0.697851	0.28401	0.642951	0.241395	-0.222354
E7F0M3	E7F0M3	coq8ab	2	2	15.5	128.4	DANRE	64822.5	Atypical kinase COQ8A, mitochondrial	SUBCELLULAR LOCATION: Membrane {ECO:0000256|ARBA:ARBA00004167}; Single-pass membrane protein {ECO:0000256|ARBA:ARBA00004167}. Mitochondrion {ECO:0000256|ARBA:ARBA00004173}.	0.195226	0.311237	0.447189	-0.116117	0.571615	0.782008	0.110179	0.591204	0.875695	0.421521	0.0406737	0.122002	0.26126	0.292363	0.448429	-0.290984	0.148422	-0.0775381	-0.0309615	0.205901	0.662975	-0.256267	0.505534	0.163094	0.1907	-0.271416	-0.0344087
A3QJU3	A3QJU3|A0A2R8QCE7	coq8b	3	2	7.5	41.8	DANRE	70029.7	Atypical kinase COQ8B, mitochondrial	SUBCELLULAR LOCATION: Mitochondrion membrane {ECO:0000250|UniProtKB:Q96D53}; Single-pass membrane protein {ECO:0000250|UniProtKB:Q96D53}. Cytoplasm, cytosol {ECO:0000250|UniProtKB:Q96D53}. Cell membrane {ECO:0000250|UniProtKB:Q96D53}.	1.04824	0.000168479	0.00343567	0.865743	0.00154223	0.0230643	0.216229	0.335726	0.725337	0.398724	0.0681127	0.172004	0.15856	0.467758	0.011274	-0.254119	0.804097	-0.568226	0.337236	0.520436	-0.177512	-0.976333	1.02397	0.53803	-0.69922	0.495931	-0.241127
F1R293	F1R293|A0A2R8QND3|E9QH78	adsl	59	5	58.2	423.57	DANRE	55091.5	Adenylosuccinate lyase	NA	0.411838	0.0757538	0.167255	-0.0250847	0.914921	0.964772	0.191678	0.420325	0.785422	0.628601	0.0114449	0.0514696	0.535446	0.0441276	0.623796	-0.398011	0.1512	0.308486	0.2143	0.512219	0.160098	-0.637377	0.780116	-0.0944977	-0.147653	0.298926	0.296462
A0A2R8RJH3	A0A2R8RJH3	adsl	2	2	50	339.18	DANRE	55853.3	Adenylosuccinate lyase	NA	-1.4067	0.00620579	0.0307478	0.218115	0.646719	0.831309	0.126807	0.78931	0.947513	-1.49801	0.00413938	0.0255429	-0.872926	-0.351664	-0.810529	0.83132	-1.28549	-0.63593	-0.122174	-0.240461	0.267239	0.319535	0.522896	-1.33495	1.31132	0.240159	1.47772
Q6DFZ8	Q6DFZ8|F6NUF6|A0A0N4SUE6	capn2l	41	24	48.7	423.53	DANRE	79426	Calcium-activated neutral proteinase 2	SUBCELLULAR LOCATION: Cell membrane {ECO:0000256|ARBA:ARBA00004236}. Cytoplasm {ECO:0000256|ARBA:ARBA00004496}. Membrane {ECO:0000256|ARBA:ARBA00004370}.	0.385016	0.0118078	0.04695	-0.232213	0.125808	0.339389	0.388196	0.0171229	0.172919	1.00543	3.9406e-06	0.000301052	0.886473	-0.0847611	0.721461	-0.564004	0.338149	0.307116	0.440489	-0.00848752	0.390272	-0.598491	0.253714	-0.0694191	-0.340993	-0.0136494	-0.212893
A0A2R8RNP1	A0A2R8RNP1|A0A0R4IK45|A5WWC4|A0A0R4IWL5	capn8	2	2	5.2	46.73	DANRE	82686	Calpain 8	NA	0.0658391	0.669962	0.76666	0.135901	0.419801	0.662437	-0.0271717	0.870239	0.971381	-0.0972336	0.530827	0.669979	-0.0661667	0.207523	-0.177209	-0.189975	0.122684	0.269826	0.0885655	0.214666	-0.0266295	-0.187072	0.196319	0.0782725	0.248686	0.15165	0.517116
A0A2R8QHT3	A0A2R8QHT3|X1WEL5|F1R984	ubr4	34	33	7.5	421.16	DANRE	579755	UBR-type domain-containing protein	NA	0.970955	1.34295e-05	0.000869078	0.854594	9.92137e-05	0.00443038	0.275384	0.0973887	0.422462	0.391745	0.0167987	0.0671205	-0.0726171	0.222923	-0.203569	-0.699115	0.716099	-0.618088	0.378212	0.296658	-0.249556	-0.789725	0.611599	0.295117	-0.904256	0.358313	-0.317714
A0A0R4IYT0	A0A0R4IYT0|Q9PW80|E9QJD2	igf2bp3	46	23	42	420.52	DANRE	66360.6	Insulin-like growth factor 2 mRNA-binding protein 3	SUBCELLULAR LOCATION: Cytoplasm {ECO:0000256|ARBA:ARBA00004496}. Nucleus {ECO:0000256|ARBA:ARBA00004123}.	-1.53889	0.0944736	0.194367	-0.849966	0.37283	0.620014	-1.30513	0.180059	0.564198	-1.99406	0.0361527	0.112485	-1.97332	-0.974592	-1.78043	-1.19066	-1.8639	-1.42303	-1.94684	-1.06697	0.106608	-1.1231	-2.54179	0.152439	2.46539	-1.36037	2.75443
F1QUQ0	F1QUQ0	iars2	41	26	33.3	420.22	DANRE	110993	Isoleucyl-tRNA synthetase	NA	0.211627	0.114678	0.222412	0.403822	0.0105797	0.0755475	0.000253535	0.998531	0.999815	-0.191941	0.149049	0.289911	0.0577126	0.222362	-0.18927	0.000835328	0.292879	-0.247476	0.00405143	0.277076	-0.176511	-0.18872	0.497878	0.264897	0.0952571	0.294395	0.304848
E7FAN5	E7FAN5|F1R704|A0A1D5NSK6	f2	60	29	42.5	419.74	DANRE	73245.3	Activation peptide fragment 1	NA	0.216925	0.136892	0.251424	-0.159328	0.300429	0.556702	0.193622	0.212742	0.609659	0.569874	0.00113627	0.010784	0.532916	0.100193	0.845776	-0.113972	0.253717	0.198451	0.356518	0.0694851	0.104114	-0.14203	0.172724	0.0664883	-0.272442	0.0332914	-0.0697963
Q9I8V0	Q9I8V0	pvalb2	727	17	99	419.47	DANRE	11678.9	Parvalbumin-2	NA	0.424653	0.0210261	0.0694411	-0.918911	0.000159951	0.00576278	-0.875893	0.000245037	0.0183728	0.467672	0.0126753	0.0548472	0.754643	0.458317	0.506655	-0.126489	-0.538823	0.321399	-0.374576	0.808444	0.589248	-0.149115	-0.214378	0.258912	0.0801156	0.474197	0.496745
Q7ZT36	Q7ZT36	pvalb3	399	12	90.8	296.62	DANRE	11604.8	Parvalbumin 3	NA	1.13503	0.000446395	0.00606788	-0.180617	0.502641	0.727516	0.075868	0.776651	0.944072	1.39151	7.23437e-05	0.00178744	0.777402	0.191673	0.781557	-0.926641	0.140516	0.468151	0.525893	0.649569	0.496315	-1.42091	0.68431	0.0289884	-0.533393	0.627256	-0.161674
Q804W0	Q804W0	pvalb1	428	10	83.4	263.2	DANRE	11484.7	Parvalbumin 1	NA	0.677289	0.00865368	0.0381918	-0.351777	0.160821	0.38907	-0.322433	0.195953	0.59057	0.706633	0.00669608	0.0355323	0.491846	0.539118	0.509474	-0.464089	-0.237374	0.367533	0.361844	0.774575	0.598197	-0.64977	0.295489	0.199136	-0.201325	0.336846	0.455701
Q6GMJ1	Q6GMJ1|Q1LYL6|F1R9X5|F8W2G9|F8W4H0	ces2a	62	12	42.5	418.41	DANRE	61204.2	Carboxylic ester hydrolase (Fragment)	NA	-0.38425	0.246594	0.376753	0.573281	0.117743	0.327173	0.717865	0.0561174	0.321206	-0.239666	0.462568	0.614272	-0.392725	-0.811475	0.433964	0.352508	0.449206	0.106705	0.416328	0.264665	-0.671766	0.672507	0.461442	-0.744021	-0.205182	0.188671	-0.384993
Q1LUZ9	Q1LUZ9|A0A2R8QSI8	ces3	24	11	36.9	351.22	DANRE	60866.7	Carboxylic ester hydrolase	NA	-0.0968987	0.715504	0.800984	0.640198	0.0404458	0.173406	0.643435	0.0395951	0.264886	-0.0936619	0.724567	0.817378	-0.440509	-0.64822	0.13443	0.0791441	0.297462	0.26777	0.747391	0.236731	-0.616446	0.403954	0.384676	-0.378688	-0.341427	0.122475	-0.421779
Q6AZA2	Q6AZA2	ndufv1	59	25	59.1	417.24	DANRE	54545.4	NADH dehydrogenase [ubiquinone] flavoprotein 1, mitochondrial	SUBCELLULAR LOCATION: Mitochondrion inner membrane {ECO:0000256|RuleBase:RU364066}; Peripheral membrane protein {ECO:0000256|RuleBase:RU364066}; Matrix side {ECO:0000256|RuleBase:RU364066}.	0.493987	0.0123401	0.0483689	0.964505	0.000162097	0.00577446	0.7082	0.00201425	0.0513027	0.237682	0.185254	0.334575	0.0942961	-0.0858049	-0.329026	-0.175095	0.897129	-0.100851	0.317843	0.111012	-0.419536	-0.399204	1.1122	0.0707343	-0.623077	0.17416	-0.508469
F1QUE3	F1QUE3|A0A2R8Q5U6|Q6NSN3	uqcrc1	96	19	43.9	415.55	DANRE	56020	Ubiquinol-cytochrome c reductase core protein 1	NA	0.903039	0.00034426	0.00521074	0.925431	0.000535672	0.0120647	0.355724	0.102132	0.433259	0.333331	0.0984503	0.21966	0.181923	0.239823	-0.200295	-0.491383	0.684842	-0.523885	0.484951	0.530001	-0.136884	-0.951792	1.09715	0.398216	-0.373905	0.43165	-0.195386
Q1L8E2	Q1L8E2	pmpcb	11	8	24.4	142.37	DANRE	52992.5	Beta-MPP	SUBCELLULAR LOCATION: Mitochondrion matrix {ECO:0000256|ARBA:ARBA00004305}.	0.22185	0.151126	0.268504	0.160879	0.324309	0.57749	-0.138078	0.39519	0.7694	-0.0771076	0.604732	0.729151	0.199028	0.297924	0.0542931	-0.0711307	-0.00387603	-0.321385	0.101071	0.364505	0.10276	-0.182253	0.411465	0.334759	0.324456	0.233336	0.272055
Q5RI45	Q5RI45	dcn	100	23	66.7	415.5	DANRE	41681.6	Decorin	SUBCELLULAR LOCATION: Secreted, extracellular space, extracellular matrix {ECO:0000256|ARBA:ARBA00004498, ECO:0000256|PIRNR:PIRNR002490, ECO:0000256|RuleBase:RU364097}.	0.716145	0.0153779	0.0561143	0.000422091	0.998807	0.999595	-0.137831	0.626988	0.889964	0.577892	0.042315	0.124916	0.445726	0.599745	0.405768	-0.6509	0.00130518	-0.0391844	0.691641	0.101066	0.318365	-0.775794	0.156327	0.847216	-0.0707948	0.135661	0.316596
Q1ECX9	Q1ECX9|Q29RV1|F1MEN8	pdia4	54	29	45	414.78	DANRE	72921.9	Protein disulfide-isomerase A4	SUBCELLULAR LOCATION: Endoplasmic reticulum lumen {ECO:0000256|ARBA:ARBA00004319, ECO:0000256|PIRNR:PIRNR036862}.	-0.511583	0.258593	0.390941	0.0343026	0.942628	0.977626	-0.215241	0.652867	0.898513	-0.761126	0.102442	0.225375	-0.550305	0.165281	-0.419653	-0.515076	-0.429052	-0.866554	-0.150363	-0.260654	0.6236	-0.358408	-0.227361	0.148769	1.25806	-0.268136	1.44701
Q6DRC0	Q6DRC0	sars1	42	28	56.8	414.48	DANRE	59173.4	Serine--tRNA ligase, cytoplasmic	SUBCELLULAR LOCATION: Cytoplasm {ECO:0000250|UniProtKB:P49591}. Nucleus {ECO:0000250|UniProtKB:P49591}. Note=Predominantly cytoplasmic, but a minor proportion is also found in the nucleus. {ECO:0000250|UniProtKB:P49591}.	-0.0496454	0.617097	0.725957	-0.164515	0.140318	0.361691	0.0172028	0.871997	0.971381	0.132072	0.19633	0.348524	0.30446	0.0033283	0.292274	0.0149593	-0.0333597	0.0576397	0.0695004	0.188399	0.287684	-0.00336669	0.176858	0.00130229	0.101977	0.0221579	0.300199
Q6NYJ9	Q6NYJ9|F6NK19|E9QC84	ap2b1	41	18	29.5	412.79	DANRE	106478	AP complex subunit beta	NA	0.0182776	0.899922	0.934857	0.00525445	0.973291	0.98762	-0.109397	0.489935	0.827984	-0.0963743	0.51083	0.652803	-0.0503185	0.372752	0.148631	-0.126128	0.00142713	0.0695596	0.20926	0.0448574	0.140478	-0.0718762	0.0363386	0.207116	0.344219	0.142232	0.547632
A0A2R8Q6M9	A0A2R8Q6M9|A5PMS9|A0A2R8QRX3	ap1b1	29	17	26.4	396.02	DANRE	108381	AP complex subunit beta	NA	-0.0939376	0.255262	0.386827	-0.135682	0.135611	0.354165	0.0863983	0.329288	0.722375	0.128143	0.128578	0.26309	0.172662	0.114481	0.223125	0.0211352	0.150848	0.364667	0.0634312	-0.0376592	0.18373	0.121722	0.0868142	-0.0149884	0.0614095	-0.00596947	0.227348
F1QTZ4	F1QTZ4|E9QD83	padi2	49	27	39.8	412.39	DANRE	73580	Protein-arginine deiminase	SUBCELLULAR LOCATION: Cytoplasm {ECO:0000256|ARBA:ARBA00004496}.	0.414993	0.0023213	0.0163393	-0.0720826	0.553199	0.767579	0.137163	0.267703	0.66667	0.624238	7.77712e-05	0.0018401	0.551416	0.0602067	0.476476	-0.372256	0.337382	0.217237	0.289989	0.183612	0.077057	-0.397041	0.148022	0.169365	-0.174287	0.0720203	-0.231183
A0A0R4IKJ0	A0A0R4IKJ0	myl10	132	12	94.6	410.39	DANRE	18996.1	Myosin, light chain 10, regulatory	NA	0.19753	0.232893	0.362694	-0.0809826	0.642591	0.83045	0.129087	0.462405	0.815365	0.4076	0.022915	0.0820925	0.614305	0.342361	0.618472	-0.0634333	0.102377	0.0402866	0.426723	-0.102629	0.259314	-0.224375	0.377234	0.34209	-0.0350716	0.110279	0.224859
E7FG54	E7FG54	myl2a	41	7	77.5	336.16	DANRE	19166.3	Myosin regulatory light chain 2a	NA	1.25648	0.198978	0.322742	-0.535499	0.602171	0.80319	-0.253219	0.804486	0.952353	1.53876	0.12142	0.25159	1.73596	0.441686	1.47823	-2.15946	-1.57061	-2.32561	0.61213	0.448907	1.14312	-1.99041	0.875752	0.310645	-1.14881	-0.298664	1.17532
Q24JV6	Q24JV6	myl2b	3	2	43.4	223.91	DANRE	19118.3	Myosin regulatory light chain 2b	NA	0.972326	3.71948e-05	0.00151426	0.551333	0.00670321	0.056298	-0.0568636	0.74449	0.933385	0.36413	0.038684	0.117817	-0.245219	0.435665	0.119422	-0.537543	0.388144	-0.270132	0.342654	0.300475	0.106847	-0.470949	0.70639	1.00881	-0.394346	0.39876	-0.342762
A0A0R4IGS2	A0A0R4IGS2|F1QTP9	si:ch73-55i23.1	39	24	58.3	409.84	DANRE	62761.2	Si:ch73-55i23.1	NA	0.181337	0.497318	0.622673	0.295184	0.311902	0.567184	0.20692	0.473832	0.821024	0.0930722	0.725781	0.818048	-0.0694128	-0.0272684	0.800259	-0.13531	0.24974	0.239587	0.082078	0.305207	-0.793486	-0.0133387	0.686446	0.122081	0.130792	0.129988	-0.177485
Q802C9	Q802C9	eif4a1a	59	8	62	409.4	DANRE	46480.5	RNA helicase	NA	-0.0257802	0.851242	0.900213	0.0108832	0.941536	0.97741	0.0434201	0.77019	0.941937	0.00675669	0.960774	0.976938	0.10422	0.215511	0.0685412	-0.167032	0.00332661	-0.0486589	0.182525	-0.0348422	0.315419	-0.124726	0.176439	0.0712184	0.338665	0.0574864	0.365588
F1R166	F1R166|A0A0R4IKM4	eif4a2	10	7	51.8	381.16	DANRE	47045	RNA helicase	NA	0.19515	0.16709	0.28835	0.189731	0.210435	0.452051	-0.54849	0.00221539	0.0538274	-0.543071	0.00134967	0.0120709	-0.255892	0.372829	-0.359886	0.271577	-0.29433	-0.491267	0.128963	0.217865	-0.485053	0.272555	-0.459513	0.355863	0.180017	0.414231	-0.143962
Q7ZU67	Q7ZU67|A0A2R8PYN1|A0A2R8Q3A3	eif4a1b	10	5	54.6	380.1	DANRE	46350.3	RNA helicase	NA	0.364382	0.0263522	0.080776	-0.120532	0.456101	0.691073	-0.17629	0.28161	0.679808	0.308623	0.0535911	0.147165	0.0390709	0.378675	0.236559	5.31261e-05	0.0147539	0.301461	0.406689	0.49685	0.532156	-0.351566	0.0488961	0.101884	0.113065	0.354872	0.113202
A0A0R4IKW3	A0A0R4IKW3|Q7ZVA6	eif4a3	23	16	41.1	272.63	DANRE	46876.3	RNA helicase	NA	-0.0677231	0.542483	0.662895	0.265513	0.0410596	0.174855	-0.0155669	0.896135	0.97704	-0.348803	0.00678465	0.035856	-0.209398	0.170472	-0.217387	0.227541	0.0234456	-0.023308	-0.110599	-0.0381014	-0.464851	0.109937	0.197484	-0.0370524	0.141691	0.114057	0.00109925
A2CEW4	A2CEW4	atic	37	25	48.3	407.62	DANRE	64569.4	5-aminoimidazole-4-carboxamide ribonucleotide formyltransferase	NA	-0.518952	0.362982	0.498364	-0.124696	0.837088	0.928617	0.0412684	0.945704	0.987269	-0.352988	0.53243	0.6712	-0.11678	0.457742	-0.0244035	-0.859258	-0.295576	-0.613187	0.0098746	-0.517775	0.825644	-0.796352	-0.0349313	-0.0176159	1.31597	-0.514935	1.82287
O42248	O42248|A0A0R4IJ56	gnb2l1	67	22	82	407.38	DANRE	35578.6	Guanine nucleotide-binding protein subunit beta-2-like 1	SUBCELLULAR LOCATION: Cytoplasm {ECO:0000269|PubMed:21262816}.	0.348792	0.107784	0.213482	0.181421	0.420266	0.662437	-0.119274	0.593473	0.876527	0.0480975	0.815302	0.879821	0.141318	0.39712	0.0802324	-0.425925	-0.127892	-0.373743	0.506151	0.313331	0.257114	-0.314996	0.244692	0.389649	0.31386	0.207601	0.339591
Q802V0	Q802V0|A0A0J9YJJ2|A0A0R4IWD0|A0A0R4IT29	ldb3b	120	21	89	406.25	DANRE	31483.2	LIM domain-binding 3b	SUBCELLULAR LOCATION: Cytoplasm, myofibril, sarcomere, Z line {ECO:0000256|ARBA:ARBA00004216}.	-0.0568038	0.785001	0.851497	-0.343328	0.143367	0.365537	0.258372	0.262075	0.661743	0.544897	0.0193804	0.0739863	0.952862	-0.238853	0.66478	0.143455	-0.245321	0.169854	0.664797	0.02615	0.561303	-0.191139	0.312139	0.235875	-0.0377273	-0.0811751	0.254624
Q90Y03	Q90Y03	aldh1a2	51	25	50.3	405.65	DANRE	57206.4	Aldehyde dehydrogenase 1 family, member A2	NA	-0.0621952	0.732262	0.813596	0.380053	0.069822	0.242067	0.167933	0.398145	0.771154	-0.274316	0.147347	0.288208	-0.506284	-0.120764	-0.238396	-0.112616	0.562198	0.0559369	0.0327661	-0.204151	-0.308505	-0.0829798	-0.202741	-0.0385583	-0.061605	0.214708	0.357216
Q6P0T8	Q6P0T8	myoz1a	150	18	82.4	405.29	DANRE	34023.1	Myozenin 1a	NA	0.174133	0.409052	0.541136	-0.599377	0.0177127	0.104804	-0.0169281	0.939955	0.986217	0.756581	0.0026916	0.0191769	1.22716	-0.104835	0.872916	-0.141886	-0.157641	0.305049	0.318778	0.367923	0.42044	-0.289829	0.159907	0.0400615	-0.0696721	0.192622	0.300628
B8JLJ3	B8JLJ3	ywhaz	93	18	75	404.55	DANRE	28075.8	Tyrosine 3-monooxygenase/tryptophan 5-monooxygenase activation protein, zeta polypeptide	NA	0.895344	0.00156576	0.0129635	0.156033	0.530418	0.750483	0.364155	0.156602	0.528564	1.10347	0.000289673	0.00434236	0.766014	0.215819	0.637261	-0.97957	0.335049	-0.279312	0.719183	0.151968	0.333736	-1.00822	0.507141	0.279757	-0.76318	-0.0223312	-0.205197
Q5PRD0	Q5PRD0|E9QJ96	ywhaba	40	11	70	369.97	DANRE	27760.5	14-3-3 protein beta/alpha-A	SUBCELLULAR LOCATION: Cytoplasm {ECO:0000250}.	0.181277	0.144915	0.261913	0.266272	0.0550054	0.210367	-0.128655	0.326586	0.721676	-0.213651	0.0906677	0.209069	-0.0642826	0.247286	-0.0375462	-0.0640784	-0.0136012	-0.0613519	0.326313	0.244943	-0.388923	-0.0447578	0.0720275	0.39508	0.142569	0.1403	0.268767
Q7ZW20	Q7ZW20	ywhae1	29	10	80.3	357.19	DANRE	29186.2	Tyrosine 3-monooxygenase/tryptophan 5-monooxygenase activation protein, epsilon polypeptide 1	NA	0.492844	0.000257381	0.00436447	0.198115	0.0862725	0.271087	-0.281158	0.0207217	0.193277	0.0135711	0.892783	0.934525	0.0904822	0.488768	0.0401877	-0.0674639	-0.0438812	-0.0956046	0.314909	0.481219	-0.223241	-0.136862	0.182185	0.313981	0.00457997	0.444949	-0.0427148
Q803M8	Q803M8	ywhaqb	36	15	70.2	315.38	DANRE	27973.8	14-3-3 protein theta	NA	0.202033	0.0980253	0.199639	0.199471	0.127175	0.340975	-0.0327445	0.793133	0.949737	-0.0301818	0.794022	0.863915	0.0952909	0.249008	0.0434933	-0.0906964	0.136612	0.0457949	0.226159	0.10022	-0.405478	0.0141698	0.0699667	0.252926	-0.132139	0.105808	0.108494
E7F354	E7F354	ywhag2	9	3	63.5	295.96	DANRE	28478.2	3-monooxygenase/tryptophan 5-monooxygenase activation protein, gamma polypeptide 2	NA	1.86788	1.78213e-05	0.000975793	1.12466	0.00277513	0.0329533	-0.102558	0.741798	0.93195	0.64066	0.0410165	0.122577	-0.0344653	0.3388	-0.101987	-1.08973	0.155129	-1.22248	0.769815	0.743974	-1.20762	-1.27115	0.524125	0.748556	-1.74329	0.510993	-1.02502
Q7T356	Q7T356|F1RBF6|F8W493	ywhabb	12	4	69.8	324.03	DANRE	27506.2	14-3-3 protein beta/alpha-B	SUBCELLULAR LOCATION: Cytoplasm {ECO:0000250}.	0.151657	0.371989	0.507127	0.414598	0.0360548	0.159765	-0.0712869	0.69387	0.916394	-0.334228	0.0626547	0.162094	0.0565381	0.19839	-0.141187	0.0367304	0.0221221	-0.197626	0.302666	0.0329483	-0.803604	-0.0535616	0.104595	0.483306	0.0845041	0.143016	0.18336
Q5CZQ1	Q5CZQ1	ywhae2	16	8	66.2	315.19	DANRE	29030	Tyrosine 3-monooxygenase/tryptophan 5-monooxygenase activation protein, epsilon polypeptide 2	NA	0.41401	0.0291794	0.0867991	-0.00255889	0.989007	0.99386	-0.284815	0.142248	0.503986	0.131754	0.448811	0.601687	0.398329	0.48536	0.258469	-0.188736	-0.131849	-0.398876	0.183881	0.40658	0.107648	-0.286975	0.214469	0.248217	0.0944984	0.354438	0.219766
Q6P102	Q6P102	ywhabl	31	11	69.3	311.66	DANRE	28021.1	Tyrosine 3-monooxygenase/tryptophan 5-monooxygenase activation protein, beta polypeptide-like	NA	0.588002	0.00701814	0.0335664	0.380798	0.0771809	0.257341	0.33995	0.110322	0.449824	0.547154	0.0107424	0.0493805	0.391765	0.0674271	0.260309	-0.705004	0.197404	-0.209099	0.660729	-0.022982	-0.120591	-0.560293	0.526049	0.501503	-0.49948	-0.0601726	-0.101456
Q7T3G2	Q7T3G2	ywhah	25	10	65.4	296.31	DANRE	28102.9	Tyrosine 3-monooxygenase/tryptophan 5-monooxygenase activation protein, eta polypeptide	NA	0.927208	0.0258988	0.0799272	0.195216	0.63175	0.821323	-0.423448	0.306551	0.701352	0.308543	0.417304	0.571607	0.3088	0.752261	0.336125	-0.705562	-0.570468	-0.823062	0.569987	0.783739	-0.0682213	-0.723712	0.40136	0.75802	-0.63844	-0.0657213	0.587182
Q7ZUM0	Q7ZUM0	ywhaqa	14	11	60.4	273.49	DANRE	27934.8	Tyrosine 3-monooxygenase/tryptophan 5-monooxygenase activation protein, theta polypeptide a	NA	-0.266603	0.137383	0.251888	-0.0394781	0.831422	0.926221	0.299012	0.124151	0.474156	0.0718874	0.676234	0.783053	0.199862	0.0571099	0.160276	-0.288432	0.00518129	-0.00807296	0.230882	-0.244204	0.39157	-8.04773e-06	0.203229	-0.0183289	0.175225	-0.404902	0.5693
Q6P3J7	Q6P3J7	ehd2b	53	21	58.1	404.37	DANRE	61586.7	EH-domain containing 2	SUBCELLULAR LOCATION: Cell membrane {ECO:0000256|ARBA:ARBA00004413}; Peripheral membrane protein {ECO:0000256|ARBA:ARBA00004413}; Cytoplasmic side {ECO:0000256|ARBA:ARBA00004413}. Endosome membrane {ECO:0000256|ARBA:ARBA00004125}; Peripheral membrane protein {ECO:0000256|ARBA:ARBA00004125}; Cytoplasmic side {ECO:0000256|ARBA:ARBA00004125}. Membrane {ECO:0000256|ARBA:ARBA00004287}; Peripheral memb…	0.0922037	0.437084	0.568487	-0.00222148	0.986	0.993622	0.43466	0.0039894	0.0759783	0.529085	0.000514388	0.00627538	0.438381	0.157213	0.597561	-0.131559	0.315407	0.336711	0.566996	-0.17295	0.367415	-0.233854	0.415983	0.0959763	-0.184081	-0.0876964	0.173223
Q66HW2	Q66HW2	ehd1b	23	18	53.7	342	DANRE	60063	EH-domain containing 1	SUBCELLULAR LOCATION: Cell membrane {ECO:0000256|ARBA:ARBA00004413}; Peripheral membrane protein {ECO:0000256|ARBA:ARBA00004413}; Cytoplasmic side {ECO:0000256|ARBA:ARBA00004413}. Endosome membrane {ECO:0000256|ARBA:ARBA00004125}; Peripheral membrane protein {ECO:0000256|ARBA:ARBA00004125}; Cytoplasmic side {ECO:0000256|ARBA:ARBA00004125}. Membrane {ECO:0000256|ARBA:ARBA00004287}; Peripheral memb…	0.034257	0.759067	0.832882	-0.174563	0.163512	0.39111	-0.554456	0.000435925	0.0236294	-0.345636	0.00762896	0.0386665	-0.174781	0.166742	-0.180161	0.257863	-0.1863	0.15461	-0.245306	0.217614	-0.234528	0.125204	-0.418229	0.473873	0.195965	0.22648	0.368649
Q6NY81	Q6NY81	ehd1a	16	11	37.5	267.34	DANRE	60290.2	EH-domain-containing 1a	SUBCELLULAR LOCATION: Cell membrane {ECO:0000256|ARBA:ARBA00004413}; Peripheral membrane protein {ECO:0000256|ARBA:ARBA00004413}; Cytoplasmic side {ECO:0000256|ARBA:ARBA00004413}. Endosome membrane {ECO:0000256|ARBA:ARBA00004125}; Peripheral membrane protein {ECO:0000256|ARBA:ARBA00004125}; Cytoplasmic side {ECO:0000256|ARBA:ARBA00004125}. Membrane {ECO:0000256|ARBA:ARBA00004287}; Peripheral memb…	-0.332391	0.00596762	0.0299181	-0.137665	0.229624	0.475211	0.0834907	0.458098	0.812659	-0.111235	0.291173	0.446836	-0.0364534	0.0316024	0.207502	0.160897	-0.00327228	0.238993	-0.211237	-0.0954059	0.105114	0.291065	0.18788	-0.222262	0.241353	-0.0834031	0.266779
F1QZ37	F1QZ37	ehd4	10	7	22.6	117.83	DANRE	70995	EH-domain-containing 4 (Fragment)	SUBCELLULAR LOCATION: Cell membrane {ECO:0000256|ARBA:ARBA00004413}; Peripheral membrane protein {ECO:0000256|ARBA:ARBA00004413}; Cytoplasmic side {ECO:0000256|ARBA:ARBA00004413}. Endosome membrane {ECO:0000256|ARBA:ARBA00004125}; Peripheral membrane protein {ECO:0000256|ARBA:ARBA00004125}; Cytoplasmic side {ECO:0000256|ARBA:ARBA00004125}. Membrane {ECO:0000256|ARBA:ARBA00004287}; Peripheral memb…	-0.00796176	0.977045	0.983558	0.0702109	0.814469	0.917326	0.399524	0.196328	0.59066	0.321352	0.257823	0.413678	0.00644188	-0.235119	0.0555024	-0.117779	0.925189	1.14729	-0.00909579	-0.00652263	-0.182699	-0.313288	0.0644405	0.0587693	0.0432567	-0.107847	0.128938
Q5TYP7	Q5TYP7	ehd3	7	5	19.8	144.48	DANRE	60849.1	EH-domain-containing 3	SUBCELLULAR LOCATION: Cell membrane {ECO:0000256|ARBA:ARBA00004413}; Peripheral membrane protein {ECO:0000256|ARBA:ARBA00004413}; Cytoplasmic side {ECO:0000256|ARBA:ARBA00004413}. Cell projection, cilium membrane {ECO:0000256|ARBA:ARBA00004522}; Peripheral membrane protein {ECO:0000256|ARBA:ARBA00004522}; Cytoplasmic side {ECO:0000256|ARBA:ARBA00004522}. Endosome membrane {ECO:0000256|ARBA:ARBA00…	0.114081	0.186731	0.30979	-0.322926	0.00297263	0.0345861	-0.0218625	0.808436	0.952461	0.415144	0.000222466	0.00364238	0.319011	0.011573	0.275541	-0.0274253	0.0896318	0.442204	0.0520081	0.0186419	0.310355	0.0326113	-0.100084	0.128729	-0.133132	-0.0160865	-0.185521
B0R1D0	B0R1D0|F1R5E3	psmc4	51	26	61.2	404.02	DANRE	47373.3	26S proteasome AAA-ATPase subunit RPT3	SUBCELLULAR LOCATION: Cytoplasm {ECO:0000256|ARBA:ARBA00004496}. Nucleus {ECO:0000256|ARBA:ARBA00004123}.	0.596199	0.00224193	0.0161922	0.318962	0.0823561	0.265761	0.000158758	0.999266	0.999815	0.277396	0.10043	0.222571	0.153575	0.435641	0.0975621	-0.422192	0.140955	-0.194019	0.610642	0.326681	0.0945466	-0.589512	0.319036	0.397126	-0.103738	0.267428	0.157522
F1R101	F1R101|A0A2R8RSJ5|A0A2R8Q280|B8JL46	eif4g1a	51	32	22.2	403.84	DANRE	182729	Eukaryotic translation initiation factor 4 gamma, 1a	NA	-0.327657	0.020675	0.0686137	0.206892	0.147336	0.370591	-0.0804632	0.559081	0.862163	-0.615012	0.000276507	0.00421474	-0.354564	-0.25125	-0.408443	-0.0985165	-0.289348	-0.7887	-0.312946	-0.212498	-0.418457	0.029252	-0.254652	-0.180987	0.0926707	-0.176007	0.46648
A0A2R8QH90	A0A2R8QH90	wu:fb16f03	5	5	15.1	84.56	DANRE	48987.2	Uncharacterized protein	NA	-0.327041	0.00587536	0.0296668	-0.245957	0.0391998	0.169669	-0.04392	0.68854	0.913785	-0.125004	0.229932	0.385103	-0.0315584	-0.022261	0.109407	0.198051	-0.0244141	0.415943	-0.0766324	0.00829514	0.150154	0.387623	-0.153865	-0.17845	0.267729	0.0282137	0.29056
A0A0R4ID77	A0A0R4ID77	A0A0R4ID77	39	18	35.5	402.13	DANRE	99553.8	Zgc:111868	NA	-1.70442	0.1698	0.291126	-1.47966	0.263605	0.515424	-0.876185	0.501062	0.832958	-1.10095	0.364761	0.522818	-2.10204	-0.810403	-1.35	-1.94663	-1.74687	-1.72206	-2.56774	-2.05994	1.78601	-2.09025	-2.66543	-0.190162	2.12421	-2.74149	2.92835
A0A2R9YJL1	A0A2R9YJL1|Q801E6|H0WE86|B8JMY8	mdh1aa	140	25	56.2	402.12	DANRE	38304.6	Malate dehydrogenase	NA	0.478923	0.0152749	0.0558672	0.231293	0.233315	0.479288	0.469311	0.0249656	0.213798	0.71694	0.0010965	0.0105347	0.647104	-0.178638	0.457715	-0.220929	0.271355	0.0709565	0.447685	0.199994	-0.0602756	-0.460699	0.811466	0.0952904	-0.669796	0.0467853	-0.400835
E7F071	E7F071	hnrnpul1l	46	25	30.3	402.01	DANRE	97055.6	Heterogeneous nuclear ribonucleoprotein U-like 1 like	NA	-0.424495	0.0011852	0.0108764	0.230527	0.0577032	0.216507	0.00462461	0.967287	0.99155	-0.650397	2.70655e-05	0.000981177	-0.12488	0.0693779	-0.118088	0.342917	-0.186843	-0.300454	-0.0385316	-0.089396	-0.37263	0.39684	0.229915	-0.0651963	0.438824	0.0727706	0.506955
Q1L9A1	Q1L9A1	hnrnpul1	18	15	22.9	230.67	DANRE	89644.8	Heterogeneous nuclear ribonucleoprotein U-like 1	NA	0.184552	0.048956	0.123944	0.0685064	0.468221	0.700843	0.0336772	0.719246	0.925808	0.149722	0.101424	0.22401	-0.00472845	-0.0291097	0.184336	-0.0407279	0.162108	0.0970589	0.0400349	0.196229	-0.0414518	-0.0322332	0.179787	0.146176	-0.0881313	0.0612365	-0.202582
A5PN55	A5PN55|A0A0R4ITK4	me2	51	23	50.6	401.82	DANRE	65501.3	Malic enzyme	NA	0.714755	1.70012e-05	0.000954549	0.590251	0.000218197	0.00693939	-0.0788614	0.508763	0.838329	0.0456427	0.677931	0.784588	-0.206319	0.36238	-0.200902	-0.201088	0.374186	-0.200849	0.0765141	0.439224	-0.430491	-0.473083	0.541134	0.371187	-0.314882	0.465099	-0.232079
A0A286Y7Z2	A0A286Y7Z2|F1QAX1|F1QU54|A0A0G2KJ00	me1	41	20	37.7	294.34	DANRE	69291	Malic enzyme	NA	0.516217	0.00213731	0.0158493	0.244408	0.117346	0.3265	0.229977	0.138485	0.501298	0.501787	0.00261565	0.0187835	0.322096	0.454966	0.12794	-0.257191	0.14186	0.102707	0.621796	-0.0580892	0.00500193	-0.277385	0.387877	0.134862	-0.571758	0.0837296	-0.343068
F1Q6Z9	F1Q6Z9|X1WHN5|A0A0J9YJ18	ganab	40	19	32.4	401.48	DANRE	107460	Glucosidase, alpha	NA	-0.175231	0.189315	0.312732	0.143082	0.314014	0.569229	0.0950346	0.498818	0.831189	-0.223279	0.101133	0.223444	-0.0771038	0.185533	-0.0606484	-0.163906	0.0274386	-0.0553272	0.148877	-0.0799687	0.0614898	0.0782815	0.15424	0.0273235	0.408824	-0.0722858	0.438326
B3DIZ3	B3DIZ3	B3DIZ3	14	12	23.7	281.93	DANRE	104642	Zgc:171967	NA	0.800617	0.00483272	0.0261288	0.485786	0.0787597	0.259436	-0.0045029	0.986146	0.995993	0.310328	0.210584	0.365151	0.310279	0.249297	0.183792	-0.66858	0.24412	-0.956873	0.218969	0.388432	-0.191653	-0.665379	0.50343	0.483295	-0.502185	0.18568	-0.0596215
F1R8B4	F1R8B4	gcn1	39	31	14.4	401.1	DANRE	283822	GCN1 activator of EIF2AK4	NA	1.22251	1.73755e-05	0.000966629	0.444996	0.0436679	0.1812	0.871083	0.000770365	0.0309558	1.6486	7.15203e-07	0.000110612	0.824142	-0.220584	0.149611	-1.00245	0.893428	0.39977	1.1585	0.324923	0.336657	-1.14591	0.56569	0.117221	-1.51531	-0.21573	-1.22054
F1RA35	F1RA35|E9QFS3	macf1a	47	38	7	400.6	DANRE	656442	Microtubule actin crosslinking factor 1a	SUBCELLULAR LOCATION: Cytoplasm, cytoskeleton {ECO:0000256|ARBA:ARBA00004245}.	0.0466026	0.901982	0.936252	0.287171	0.486439	0.715902	0.356624	0.389876	0.76597	0.116055	0.759439	0.840126	-0.192053	-0.755138	-0.508616	0.0210435	0.226679	0.91969	-0.145284	-0.157784	-1.20768	0.0748829	0.0386251	-0.0814226	-0.61062	-0.272125	-0.938186
Q6PE25	Q6PE25|A0A140LFQ3	eef1g	77	26	45.9	399.34	DANRE	50912.1	Elongation factor 1-gamma	NA	0.401949	0.0233358	0.0741239	0.240406	0.177955	0.412733	-0.456744	0.0181147	0.179786	-0.295201	0.0815279	0.195599	-0.00462128	0.511184	-0.130242	-0.0980367	-0.152087	-0.717207	0.247965	0.496113	-0.164963	-0.119977	-0.137433	0.276932	0.172231	0.487338	0.209552
Q804H0	Q804H0|Q32PQ2|A0A0R4ICD6	anxa1c	44	18	64.8	399.26	DANRE	37945.5	Annexin	SUBCELLULAR LOCATION: Basolateral cell membrane {ECO:0000256|ARBA:ARBA00004187}. Cell membrane {ECO:0000256|ARBA:ARBA00004236}. Cell projection, cilium {ECO:0000256|ARBA:ARBA00004138}. Cytoplasm {ECO:0000256|ARBA:ARBA00004496}. Lateral cell membrane {ECO:0000256|ARBA:ARBA00004124}. Membrane {ECO:0000256|ARBA:ARBA00004370}. Nucleus {ECO:0000256|ARBA:ARBA00004123}.	0.187643	0.38457	0.518043	0.241894	0.302419	0.558589	0.556439	0.0282876	0.225377	0.502188	0.0317771	0.10291	0.665857	0.108973	0.346077	-0.704569	0.418474	-0.14128	0.0743763	-0.281262	-0.108059	-0.271042	0.804779	-0.181802	-0.107608	-0.141494	-0.162938
A0A0G2L5W0	A0A0G2L5W0|A0A2R8RXX8	anxa1d	8	4	23.8	120.82	DANRE	38365.2	Annexin	SUBCELLULAR LOCATION: Basolateral cell membrane {ECO:0000256|ARBA:ARBA00004187}. Cell membrane {ECO:0000256|ARBA:ARBA00004236}. Cell projection, cilium {ECO:0000256|ARBA:ARBA00004138}. Cytoplasm {ECO:0000256|ARBA:ARBA00004496}. Lateral cell membrane {ECO:0000256|ARBA:ARBA00004124}. Membrane {ECO:0000256|ARBA:ARBA00004370}. Nucleus {ECO:0000256|ARBA:ARBA00004123}.	0.242118	0.394783	0.527764	-0.62736	0.0548837	0.210029	-0.22337	0.465585	0.816731	0.646109	0.0355073	0.110967	1.0488	0.366054	0.768259	-0.831282	0.0307947	-0.141016	-0.0141265	0.0518749	0.74343	-0.0877354	-0.0841452	0.154927	0.439746	0.230653	0.314309
F6NP87	F6NP87|F1R5B8|A0A2R8RUA9	ndufa9a	53	23	50.2	398.44	DANRE	43073.1	NADH:ubiquinone oxidoreductase subunit A9a	NA	0.387557	0.0397879	0.106665	0.633279	0.00429903	0.0426234	0.443206	0.0310013	0.236026	0.197484	0.264859	0.421978	0.418624	0.077258	0.0136506	-0.163852	0.418908	-0.366322	0.424288	0.29937	-0.0945166	-0.355806	1.03522	0.19794	-0.237132	0.157162	-0.0617103
A0A0R4IDE1	A0A0R4IDE1|E7FH53	myot	43	25	35.6	397.9	DANRE	97672	Myotilin	NA	0.858195	4.03245e-05	0.00158115	0.285406	0.083298	0.267304	-0.347096	0.0400852	0.266758	0.225693	0.133011	0.268863	0.232769	0.451549	0.0321833	-0.211103	-0.0400385	-0.474523	0.388827	0.616763	-0.203259	-0.357249	0.197807	0.523874	-0.442122	0.524992	-0.305129
A8HAJ8	A8HAJ8|A0A2R8QGK2	c8b	44	25	52.8	397.36	DANRE	64538.7	Complement component 8 subunit beta	SUBCELLULAR LOCATION: Secreted {ECO:0000256|ARBA:ARBA00004613}.	-0.166724	0.269381	0.402359	0.454198	0.0122917	0.082478	0.78604	0.000237374	0.0183589	0.165118	0.2738	0.430651	0.0296023	-0.38456	0.27862	0.0719116	0.605191	0.368361	0.564063	-0.168202	-0.302434	0.0678394	0.473952	-0.3576	-0.181264	-0.0428564	-0.244812
Q6TGS6	Q6TGS6|A0A0R4I9C1|Q1LWM3|Q1LWM2|Q1LWM1|Q1LWM0	yars1	46	29	50.2	396.74	DANRE	59817.8	Tyrosine--tRNA ligase, cytoplasmic	SUBCELLULAR LOCATION: Cytoplasm {ECO:0000250}.	-0.256747	0.0139605	0.0526381	-0.218166	0.0436288	0.181172	-0.170851	0.103522	0.437399	-0.209433	0.037469	0.11528	0.177666	-0.0355279	0.0662061	0.250289	-0.0684432	0.142342	-0.192261	0.206926	0.0550454	0.160571	-0.0628486	-0.0136429	0.426497	0.0942451	0.441633
Q1LUP1	Q1LUP1|A0A2R8QBF8|Q1LUP2|A0A2R8Q5P5|Q1LY67|Q1LY66|Q1LY65	add3a	41	24	41.9	395.76	DANRE	75764.4	Adducin 3 (gamma) a	NA	0.181327	0.152669	0.270456	0.0018123	0.988991	0.99386	-0.172676	0.203347	0.598203	0.00683919	0.95515	0.973418	0.109645	0.380044	0.109903	-0.0948802	-0.0469061	-0.11654	0.292554	0.0982212	0.17693	-0.0980394	-0.0302578	0.305456	0.226644	0.194168	0.218857
A0A2R8QRU4	A0A2R8QRU4	cald1a	46	27	42	395.71	DANRE	60533.4	Caldesmon 1a	SUBCELLULAR LOCATION: Cytoplasm, cytoskeleton, stress fiber {ECO:0000256|ARBA:ARBA00004529}. Cytoplasm, myofibril {ECO:0000256|ARBA:ARBA00004657}.	0.130511	0.373465	0.508156	0.023081	0.882331	0.948925	-0.2331	0.151585	0.517971	-0.125669	0.390915	0.54635	-0.130824	0.318758	0.0249557	-0.142565	0.0842069	0.0243905	0.149344	0.0256275	-0.100934	-0.130988	-0.301117	0.34508	0.184929	0.152845	0.408889
F1Q9I7	F1Q9I7|A0A0R4ILH4|A0A0R4ISH4	snx1a	41	25	43.5	395.71	DANRE	74085.4	Sorting nexin 1a	NA	0.167377	0.231627	0.361294	0.112559	0.448518	0.686473	-0.152879	0.307891	0.702807	-0.0980607	0.475163	0.624069	0.0165853	0.379082	0.0144103	-0.176659	0.0208743	-0.179116	0.244115	0.122567	0.0663214	-0.105028	0.0113382	0.379934	0.183737	0.0983677	0.408394
A0A0G2L9K3	A0A0G2L9K3	snx2	5	5	16	76.63	DANRE	57865.5	Sorting nexin 2	SUBCELLULAR LOCATION: Membrane {ECO:0000256|ARBA:ARBA00004287}; Peripheral membrane protein {ECO:0000256|ARBA:ARBA00004287}; Cytoplasmic side {ECO:0000256|ARBA:ARBA00004287}.	-0.234908	0.0235945	0.0747433	-0.0418769	0.678678	0.847479	-0.487819	0.000283517	0.0194337	-0.68085	5.3307e-06	0.000363462	-0.238463	0.111428	-0.267369	0.30828	-0.23438	-0.48206	-0.294172	0.0813055	-0.254422	0.48021	-0.528814	0.11994	0.385221	0.228779	0.307374
F1R5M2	F1R5M2|B0UYK4|B0S8J1|E7F8S2|A0A2R8Q547	kif5ba	38	16	34.5	394.71	DANRE	110893	Kinesin-like protein	NA	-0.045142	0.578632	0.694885	-0.142693	0.119629	0.330395	-0.0841399	0.34364	0.729869	0.0134112	0.868206	0.918468	0.202489	0.215174	0.14136	0.0590603	-0.0486286	0.210256	0.0121382	0.128194	0.181659	0.174774	0.160234	0.0457554	0.159361	0.112428	0.288925
A0A0R4IRM1	A0A0R4IRM1|A0A286YA13	kif5ba	8	8	28.6	336.9	DANRE	109704	Kinesin-like protein	NA	-0.831672	0.000314085	0.00497982	-0.82121	0.000665242	0.0136958	0.447931	0.0304017	0.233423	0.43747	0.0236629	0.0837311	1.18003	-0.625477	0.90884	0.609694	-0.0148341	0.35806	0.0438596	-0.446882	0.671767	0.396433	-0.153634	-0.66722	0.104916	-0.21829	0.257775
A0A0R4IWI7	A0A0R4IWI7	kif5aa	3	3	8.3	96.19	DANRE	118706	Kinesin family member 5A, a	NA	1.15638	0.00256359	0.0173329	0.253449	0.46233	0.695278	1.45111	0.000832038	0.0321449	2.35404	4.26861e-06	0.000318438	0.74696	-1.06945	0.419735	-2.2588	0.698375	0.1921	0.591327	-0.79487	0.336685	-1.03688	0.742255	0.0407325	-2.45754	-1.27157	-1.96748
F1QDG9	F1QDG9|F8W4X0	smyd1a	65	24	46.2	394.3	DANRE	53047.4	SET and MYND domain-containing 1a	NA	-0.739675	0.00886798	0.03876	-1.31615	0.00022175	0.00693939	-0.0605806	0.818871	0.955526	0.515894	0.0512544	0.142608	1.47216	-0.25938	1.18209	0.495747	-0.367014	0.441064	-0.619038	-0.109684	0.80208	0.188177	-0.0393568	-0.817393	0.387418	0.0615675	0.76247
A0A2R8QGK7	A0A2R8QGK7|A0A0R4IH35	mccc1	59	27	41.9	394.25	DANRE	78528.9	Methylcrotonoyl-CoA carboxylase 1 (alpha)	NA	0.563331	0.000709029	0.00784758	0.529979	0.00204169	0.0276537	0.0732527	0.603276	0.880952	0.106604	0.41764	0.571607	0.124202	0.251362	-0.0611314	-0.10383	0.485666	-0.222326	0.15126	0.447547	-0.22286	-0.442479	0.666424	0.359211	-0.182154	0.386668	-0.0800696
A0A2R8RUC9	A0A2R8RUC9|F1QFG2	papss2a	37	15	44.3	393.37	DANRE	69763.8	3'-phosphoadenosine-5'-phosphosulfate synthase	NA	0.540507	0.376737	0.510527	0.359819	0.582247	0.787686	-0.0840149	0.897208	0.97704	0.096674	0.872458	0.921889	-0.836969	-1.01603	-0.619813	0.343776	0.480612	0.962941	-1.09985	1.4205	-0.807968	-0.137375	0.722335	-0.406056	-0.836168	0.47511	-1.05874
Q802U9	Q802U9	papss2b	5	4	20.5	177.13	DANRE	70016.1	3'-phosphoadenosine-5'-phosphosulfate synthase	NA	-0.227989	0.436966	0.568459	0.0400597	0.898176	0.958234	0.381616	0.235989	0.637141	0.113567	0.69597	0.797676	-0.0662874	-0.50595	-0.0501246	0.531219	0.562181	0.726562	-0.499863	0.134242	-0.183749	0.175316	0.377663	-0.318268	-0.305661	-0.249849	-0.428742
Q7ZTI0	Q7ZTI0	ssb	45	26	57.6	393.06	DANRE	46251.2	Sjogren syndrome antigen B (Autoantigen La)	NA	-0.343016	0.247752	0.378158	0.256797	0.416644	0.660188	0.0813169	0.794624	0.950275	-0.518497	0.0905226	0.208957	-0.0636509	-0.0349628	-0.133344	-0.322255	-0.193623	-0.456795	0.242203	-0.143902	-0.0773019	-0.275678	0.173493	0.278421	0.870233	-0.128726	1.07059
F1R605	F1R605|Q2Q552|Q6DG31|Q2Q551|F1RE82|A0A2R8S0F4|E9QF66|A0A0R4IFE8|A0A0R4IK22|A0A0R4IWG7|A0A0R4IXU9|A0A2R8QE38|A0A2R8QMG9	cacnb1	53	15	55.3	393.01	DANRE	57580.9	Calcium channel voltage-dependent subunit beta 1	SUBCELLULAR LOCATION: Cell membrane, sarcolemma {ECO:0000256|ARBA:ARBA00004278}; Peripheral membrane protein {ECO:0000256|ARBA:ARBA00004278}; Cytoplasmic side {ECO:0000256|ARBA:ARBA00004278}. Cell membrane {ECO:0000256|ARBA:ARBA00004202}; Peripheral membrane protein {ECO:0000256|ARBA:ARBA00004202}. Membrane {ECO:0000256|ARBA:ARBA00004170}; Peripheral membrane protein {ECO:0000256|ARBA:ARBA0000417…	0.442376	0.00117799	0.0108714	0.189151	0.124765	0.338579	-0.0415376	0.72418	0.926826	0.211687	0.0689061	0.173279	0.310278	0.289481	0.162211	-0.116779	0.150761	0.0216626	0.320609	0.445508	-0.0831584	-0.252114	0.404329	0.238382	-0.13371	0.360378	0.0668461
A2SZ53	A2SZ53|E7EYY0	A2SZ53	2	2	20.1	58.04	DANRE	42004.5	Calcium channel, voltage-dependent, beta 2b	NA	-0.897299	0.27953	0.41285	-0.793117	0.372549	0.619929	-0.940931	0.293155	0.688335	-1.04511	0.211508	0.366056	-0.989047	1.80205	-0.93499	-1.05705	-1.43475	-0.520488	-1.24701	-1.35389	0.374313	-0.717001	-1.25024	-0.538055	1.78646	-1.38906	2.09783
Q7ZUS9	Q7ZUS9	etfa	48	16	64.8	392.89	DANRE	35317.9	Electron transfer flavoprotein subunit alpha	SUBCELLULAR LOCATION: Mitochondrion matrix {ECO:0000256|ARBA:ARBA00004305, ECO:0000256|PIRNR:PIRNR000089}.	1.26948	0.0018364	0.0144528	0.693512	0.0698182	0.242067	-0.017134	0.961772	0.990585	0.558829	0.109149	0.234409	0.423968	0.370595	0.0558661	-0.799899	0.277134	-1.13135	0.335495	0.703908	-0.0221843	-1.38402	0.962632	0.682746	-0.65438	0.411635	-0.0707228
F1QE62	F1QE62	hibadhb	64	14	78.1	392.5	DANRE	35089	3-hydroxyisobutyrate dehydrogenase	NA	0.541112	0.00043119	0.00593281	0.528746	0.000972925	0.0168101	-0.0758207	0.552602	0.858971	-0.0634549	0.590904	0.718765	-0.00274613	0.336439	-0.0168428	0.0430003	0.350996	-0.385403	0.168678	0.444159	-0.325547	-0.236372	0.51866	0.401571	-0.199693	0.505561	-0.0836543
A0A0R4IA23	A0A0R4IA23|A0A0J9YJE8|A0A2R8RU53	hibadha	14	10	46.6	216.23	DANRE	35218	3-hydroxyisobutyrate dehydrogenase	NA	0.300928	0.0459579	0.118145	0.0634686	0.673273	0.845726	-0.34662	0.035064	0.248279	-0.109161	0.43739	0.590607	0.241426	0.410969	-0.0361709	-0.121034	-0.0283966	-0.160705	-0.103834	0.507022	-0.0556052	-0.0736124	0.314345	0.33496	0.238758	0.37635	0.381479
F1Q820	F1Q820	farsb	40	24	45.9	391.73	DANRE	66886.1	Phenylalanyl-tRNA synthetase beta subunit	NA	0.250437	0.156195	0.274478	-0.220423	0.241679	0.490124	-0.447785	0.0271388	0.221915	0.0230748	0.89176	0.934455	0.317256	0.412792	0.252676	-0.207047	-0.21859	0.0293387	0.00575412	0.65431	0.119333	-0.116455	0.0905201	0.235972	0.420256	0.32498	0.529551
A0A2R8PVJ3	A0A2R8PVJ3	A0A2R8PVJ3	60	24	40.9	390.39	DANRE	67636.7	WD repeat domain 1	NA	0.346003	0.0697941	0.158593	0.140421	0.470667	0.703131	-0.0442844	0.81835	0.955526	0.161297	0.373413	0.530542	0.318297	0.379514	0.249325	-0.441845	0.0842015	-0.186179	0.312382	0.181648	0.0366105	-0.320686	0.338221	0.377372	0.137771	0.218342	0.397626
F1R4N4	F1R4N4|A0A0R4IUG9	zpax4	33	23	35.5	389.91	DANRE	94323.4	Zona pellucida protein AX 4	NA	-1.74205	0.0831836	0.177686	-1.36084	0.197603	0.436811	-0.719864	0.485122	0.825944	-1.10107	0.256524	0.412638	-1.48119	-0.693104	-1.22704	-1.15627	-1.50834	-0.907092	-1.60806	-1.59087	1.66864	-1.25428	-2.42614	-0.327853	2.14784	-1.89876	2.7203
E9QFY4	E9QFY4|A0A2R8QJD7|E9QCI3	synpo2b	55	29	47.6	389.56	DANRE	68079.9	Synaptopodin 2b	NA	0.806659	0.00046049	0.00617426	0.407645	0.0483224	0.193932	-0.162562	0.400148	0.772722	0.236451	0.195044	0.347213	0.210627	0.449593	0.135818	-0.316863	0.036705	-0.282002	0.721734	0.74438	-0.24477	-0.561186	0.329252	0.363085	-0.251342	0.543446	0.00325914
Q7T3G5	Q7T3G5|F1QUU2	pabpc4	52	19	42.7	387.66	DANRE	70896.8	Polyadenylate-binding protein	SUBCELLULAR LOCATION: Cytoplasm {ECO:0000256|RuleBase:RU362004}.	0.461623	0.0025603	0.0173292	0.0673985	0.622236	0.814029	-0.0344382	0.800535	0.952353	0.359786	0.0123135	0.0538113	0.451825	0.218186	0.170004	-0.200155	0.383602	-0.0203926	0.385611	0.383726	0.0995504	-0.304709	-0.0412774	0.336197	-0.152144	0.170225	-0.0811506
F1QB54	F1QB54|Q6P3L1|B8JLJ5|I3ITD9	pabpc1a	37	19	38.8	379.56	DANRE	71018.1	Polyadenylate-binding protein 1A	SUBCELLULAR LOCATION: Cytoplasm {ECO:0000250|UniProtKB:P20965}. Note=Associated with polysomes. {ECO:0000250|UniProtKB:P20965}.	-0.19708	0.18647	0.309713	0.0444023	0.775582	0.901387	-0.161912	0.307963	0.702807	-0.403393	0.0136416	0.0576677	-0.109485	0.201199	-0.0550362	0.0100253	-0.21664	-0.228049	-0.207239	0.0619044	-0.0717908	0.0898256	0.208814	-0.074017	0.473633	0.171807	0.575728
Q6TGY6	Q6TGY6|B8K0D5|A0A2R8Q5W2|B8K0D6	pabpc1l	25	18	41.1	385.79	DANRE	69309.9	Polyadenylate-binding protein	SUBCELLULAR LOCATION: Cytoplasm {ECO:0000256|RuleBase:RU362004}.	-1.86642	0.0168337	0.0595091	-0.880305	0.252089	0.501883	-0.215955	0.77329	0.942392	-1.20207	0.10068	0.22284	-0.901149	-1.23531	-0.681932	-0.670742	-1.08172	-0.325178	-1.33785	-1.28101	0.377298	-0.804427	-1.36957	-0.231555	2.12405	-1.44049	2.62846
F1Q5Q3	F1Q5Q3|Q802Z9	serbp1a	49	20	66.8	387.63	DANRE	43277.6	SERPINE1 mRNA-binding protein 1a	SUBCELLULAR LOCATION: Cytoplasm {ECO:0000256|ARBA:ARBA00004496}. Nucleus {ECO:0000256|ARBA:ARBA00004123}.	0.845211	0.000284426	0.00464905	0.399702	0.0502373	0.198229	-0.134501	0.480176	0.824152	0.311008	0.0927986	0.212509	0.293722	0.365669	0.0410843	-0.354791	0.169817	-0.655493	0.522417	0.573481	-0.222374	-0.445497	0.0995764	0.328866	-0.550893	0.325735	-0.435912
E7EYQ0	E7EYQ0	serbp1b	17	12	40.7	219.3	DANRE	44044.2	SERPINE1 mRNA-binding protein 1b	SUBCELLULAR LOCATION: Cytoplasm {ECO:0000256|ARBA:ARBA00004496}. Nucleus {ECO:0000256|ARBA:ARBA00004123}.	0.799294	9.35521e-06	0.000726929	0.117748	0.353812	0.603259	0.160411	0.212977	0.609797	0.841958	5.43147e-06	0.000366342	0.322564	0.109091	0.199486	-0.427216	0.220149	0.360001	0.456955	0.364113	0.134424	-0.430271	0.438495	0.279997	-0.828882	0.0926198	-0.664987
A0A0G2KCW6	A0A0G2KCW6	ddb1	42	30	23.6	387.21	DANRE	128371	DNA damage-binding protein 1	NA	0.106144	0.442512	0.573284	-0.0063334	0.965756	0.985591	0.0614517	0.678052	0.908942	0.173929	0.216987	0.371805	0.114201	0.0462785	-0.0134396	0.0846976	0.292208	0.576537	0.0752875	0.0771637	-0.0834863	0.0708189	0.0588636	-0.00706078	-0.122873	0.20629	-0.134547
A0A2R8RUW2	A0A2R8RUW2|B0R171	copb2	41	26	31.7	385.7	DANRE	111842	Coatomer subunit beta'	SUBCELLULAR LOCATION: Cytoplasmic vesicle, COPI-coated vesicle membrane {ECO:0000256|ARBA:ARBA00004347, ECO:0000256|PIRNR:PIRNR005567}; Peripheral membrane protein {ECO:0000256|ARBA:ARBA00004347, ECO:0000256|PIRNR:PIRNR005567}; Cytoplasmic side {ECO:0000256|ARBA:ARBA00004347, ECO:0000256|PIRNR:PIRNR005567}. Golgi apparatus membrane {ECO:0000256|PIRNR:PIRNR005567}; Peripheral membrane protein {ECO…	-0.214669	0.0751937	0.166295	-0.0804355	0.513674	0.737029	-0.00423127	0.972355	0.992077	-0.138465	0.233998	0.388684	-0.104964	0.146709	0.0400767	-0.0525314	-0.0478497	0.0382719	0.0134135	-0.137468	0.251615	0.145102	-0.0381205	-0.0568913	0.30157	-0.0321675	0.384718
Q5BJJ2	Q5BJJ2|F1QBR2	rpl3	65	24	47.3	385.32	DANRE	46653.6	Ribosomal protein L3	NA	0.411296	0.0838025	0.178647	0.415605	0.103323	0.301643	-0.284705	0.2513	0.653978	-0.289015	0.210778	0.365351	-0.0402918	0.550303	-0.237712	-0.444529	-0.112031	-0.725319	0.463287	0.449348	-0.0560568	-0.293369	0.101027	0.437228	0.455489	0.304986	0.37909
Q6PE26	Q6PE26	calr3a	57	15	48.3	384.58	DANRE	48767.4	Calreticulin	SUBCELLULAR LOCATION: Endoplasmic reticulum lumen {ECO:0000256|PIRNR:PIRNR002356}.	0.251678	0.147239	0.264305	0.482388	0.0171292	0.103609	-0.010233	0.954587	0.989699	-0.240943	0.163861	0.308779	-0.157521	0.258053	-0.232095	-0.398893	-0.0359225	-0.660843	0.428956	0.0650966	-0.21492	-0.235636	0.105096	0.328833	0.102196	0.0531217	0.230726
A0A0R4IL29	A0A0R4IL29	calr3b	18	9	39.8	295.87	DANRE	48458	Calreticulin	SUBCELLULAR LOCATION: Endoplasmic reticulum lumen {ECO:0000256|PIRNR:PIRNR002356}.	-0.288628	0.221851	0.350692	-0.0158748	0.948875	0.97914	-0.0538105	0.828086	0.956677	-0.326564	0.170317	0.316896	-0.242537	0.166511	-0.186988	-0.189042	-0.196845	-0.0963865	-0.0585566	-0.0332674	0.45371	-0.0524026	0.153626	0.0814803	0.611608	-0.135183	0.86389
F1Q8W8	F1Q8W8	calr	32	16	40	271.12	DANRE	48810.4	Calreticulin	SUBCELLULAR LOCATION: Endoplasmic reticulum lumen {ECO:0000256|PIRNR:PIRNR002356}.	-0.568208	0.0700439	0.15882	0.078407	0.804659	0.914612	-0.0893281	0.778199	0.94444	-0.735943	0.0239705	0.0843489	-0.290179	0.0698947	-0.425471	-0.24929	-0.351596	-0.325362	-0.0165848	-0.168591	-0.0232731	0.0647128	-0.194813	-0.0743904	0.523954	-0.220259	1.54011
X1WD71	X1WD71|X1WHT2|X1WC51|X1WFD2	ap2a1	43	28	30.2	384.44	DANRE	107242	AP-2 complex subunit alpha	SUBCELLULAR LOCATION: Membrane, coated pit {ECO:0000256|PIRNR:PIRNR037091}.	-0.0539032	0.677296	0.771724	-0.0505241	0.717769	0.870013	0.121778	0.389528	0.76597	0.118398	0.366912	0.524715	-0.022435	0.0963528	0.212749	-0.139312	0.12587	0.220723	0.222662	-0.056571	0.414868	-0.0893502	0.119324	0.167088	0.226458	-0.0701713	0.354515
Q5RH67	Q5RH67	akr1b1.2	72	21	61	384.01	DANRE	38868.9	Aldo-keto reductase family 1, member B1 (aldose reductase), tandem duplicate 2 (Fragment)	NA	0.36454	0.0643304	0.150215	-0.60088	0.00876265	0.0662264	-0.0793352	0.690123	0.914632	0.886085	0.000292484	0.00437416	0.951045	0.232732	0.875494	-0.255142	0.0864786	0.452775	0.277364	0.299351	0.678177	-0.660119	0.0516354	0.088013	-0.0157231	0.251216	0.344136
Q5TYY5	Q5TYY5|A0A2R8QK40	akr1b1.1	9	7	26.9	123.16	DANRE	35767.3	Aldo-keto reductase family 1, member B1 (aldose reductase), tandem duplicate 1	NA	-1.00646	0.0239597	0.0755751	0.0660066	0.878891	0.946165	-0.121444	0.779448	0.94444	-1.19391	0.00967852	0.0455955	-0.452589	-0.524827	-0.307472	0.926481	-0.250218	-0.522637	-0.851339	-0.532996	-1.52159	1.23289	-0.803637	-1.13236	0.400888	0.135695	-0.588892
E7F4T2	E7F4T2|Q5TZ68|A0A2R8QDT8|A0A2R8RSK7	cacna2d1a	43	25	28.3	383.1	DANRE	125008	Calcium channel, voltage-dependent, alpha 2/delta subunit 1a	NA	0.190366	0.389147	0.522322	-0.410703	0.0987133	0.293421	-0.843973	0.00295624	0.06465	-0.242905	0.27619	0.433388	0.612509	0.54104	-0.193248	0.111117	-0.509483	-0.195997	0.0618665	0.492	-0.139357	0.102105	-0.721561	0.239923	0.180897	0.544026	0.661407
Q8AW82	Q8AW82	pa2g4a	51	17	56.1	382.12	DANRE	43722.2	Novel protein similar to human proliferation-associated 2G4 protein (PA2G4)	NA	0.4226	0.0791956	0.172124	0.0862262	0.724534	0.873602	-0.509893	0.0531316	0.311136	-0.173519	0.447847	0.601015	0.0171241	0.595304	0.0441513	-0.312291	-0.271761	-0.59911	0.174537	0.522597	0.0510193	-0.392651	-0.00920948	0.434751	0.273655	0.345008	0.638546
Q6PHD8	Q6PHD8|A0A0R4IQ97|E9QCR3	pa2g4b	30	16	58.6	377.49	DANRE	43874.3	Proliferation-associated 2G4, b	NA	0.0280353	0.875603	0.916803	0.0698888	0.718449	0.870236	-0.259931	0.193958	0.587151	-0.301785	0.109647	0.235049	-0.104759	0.364039	-0.0116544	-0.161724	-0.126315	-0.23868	0.165691	0.270329	0.0652921	-0.116572	-0.0470602	0.308734	0.523429	0.0863761	0.672205
Q7SXL4	Q7SXL4|A0A0R4IS05|Q9PTF3	nme2b.2	590	14	88.2	380.43	DANRE	17237.5	Nucleoside diphosphate kinase	NA	-0.0232181	0.855078	0.902464	-1.70235	1.31073e-08	4.52184e-05	-0.69043	0.000202493	0.0171228	0.988704	2.69197e-06	0.000243854	1.01574	0.133317	1.05734	0.129403	-0.488647	1.32116	-0.636108	0.41089	1.04277	-0.0168528	-0.654539	-0.190675	0.104123	0.0357977	0.265528
F1RBS6	F1RBS6	nme2b.1	21	6	66	196.69	DANRE	17375.8	Nucleoside diphosphate kinase	NA	-0.721148	0.0184551	0.0634681	-0.433461	0.157461	0.384468	-0.312574	0.298868	0.695057	-0.600261	0.0430132	0.12646	-0.193029	0.134189	-0.216609	-0.144423	-0.550594	0.00216358	-0.498918	-0.344313	0.273002	0.104488	-0.351727	-0.149246	1.04714	-0.258651	1.25937
Q642H9	Q642H9	rps4x	64	27	73.7	380.35	DANRE	29915.6	40S ribosomal protein S4, X isoform	NA	0.125328	0.449054	0.579313	0.460345	0.0200107	0.11229	0.102443	0.564832	0.86477	-0.232574	0.171343	0.317893	-0.0594488	0.169154	-0.358391	-0.357057	-0.00917765	-0.318338	0.52889	0.0874315	-0.232131	-0.201355	0.135091	0.248633	0.326775	-0.0419186	0.193623
F1QUG5	F1QUG5|Q6PFQ2	eif3c	38	28	27.5	380.1	DANRE	107222	Eukaryotic translation initiation factor 3 subunit C	SUBCELLULAR LOCATION: Cytoplasm {ECO:0000256|HAMAP-Rule:MF_03002}.	0.499679	0.0064947	0.031733	0.34093	0.0613956	0.224566	-0.0912038	0.592807	0.876155	0.0675448	0.668166	0.778401	0.0350379	0.354433	-0.0564381	-0.35887	0.0269811	-0.39349	0.523609	0.29197	0.0832244	-0.397277	0.223451	0.481787	-0.00737231	0.268681	0.161674
Q6P5K3	Q6P5K3|Q9PV90|F8W4I2	rplp0	63	23	58.5	376.81	DANRE	34596.2	60S acidic ribosomal protein P0	NA	0.630373	0.0418566	0.110283	0.298678	0.339697	0.592578	-0.215308	0.487493	0.82643	0.116387	0.683287	0.787925	0.120736	0.604321	0.0213924	-0.786627	-0.169464	-0.452883	0.573514	0.496609	0.120024	-0.660257	0.348936	0.567105	0.29664	0.197178	0.493967
A0A0R4IML0	A0A0R4IML0|A0A2R8Q5S0|A0A0R4IZL5|F1R3V3|A0A2R8RPR6|A0A2R8QCX4|A0A2R8QD05|X1WEC4	capgb	61	22	64.3	375.71	DANRE	38890.2	Capping protein (actin filament), gelsolin-like b	NA	0.249894	0.0777115	0.170323	0.102439	0.479807	0.711293	0.458581	0.00633949	0.100765	0.606036	0.000471924	0.00593744	0.572207	0.0868812	0.404307	-0.432662	0.359994	0.117456	0.518413	-0.153114	0.213875	-0.492868	0.409793	-0.0185129	-0.236023	-0.0319764	0.0452535
F1QFQ7	F1QFQ7|A0A0G2L3J0|F8W3E0	acadsb	50	22	60.4	375.13	DANRE	47339.5	Acyl-CoA dehydrogenase short/branched chain	NA	0.748946	1.83822e-06	0.00027914	0.482632	0.000300775	0.00832845	-0.14649	0.160812	0.534804	0.119824	0.211522	0.366056	-0.0465363	0.406505	-0.175106	-0.397766	0.347283	-0.30786	0.153886	0.324791	-0.26755	-0.414303	0.348938	0.487588	-0.27202	0.50055	-0.19226
F1Q5K3	F1Q5K3|F1Q4Q8|E7EZU7	sardh	34	26	30.5	374.97	DANRE	104012	Sarcosine dehydrogenase	NA	-0.675021	0.000138111	0.00315073	-0.0512538	0.712818	0.868027	-0.356091	0.021617	0.196976	-0.979858	3.37201e-06	0.000285092	-0.408891	-0.272395	-0.445402	0.59389	-0.391581	-0.503919	-0.703704	-0.067776	-0.684756	0.739414	-0.590703	-0.341264	0.326598	-0.142183	0.216563
Q6NXA4	Q6NXA4|A0A0R4IUQ9|A0A0R4IBM8|A0A0R4IBR5|A0A0R4IRK1|A0A0R4IPU4|A0A0R4IHG8|A0A2R8Q4T1|F1QB35	ilf3	47	33	39.8	374.79	DANRE	90948.1	Interleukin enhancer-binding factor 3 homolog	SUBCELLULAR LOCATION: Nucleus, nucleolus {ECO:0000250|UniProtKB:Q12906}. Cytoplasm {ECO:0000250|UniProtKB:Q12906}. Nucleus {ECO:0000250|UniProtKB:Q12906}.	0.0930124	0.269262	0.402275	0.091638	0.31165	0.567052	0.00753741	0.932297	0.984618	0.00891183	0.913612	0.945686	0.125569	0.17085	0.10646	0.0800342	0.0626334	0.0791451	0.155605	0.147834	0.00381515	-0.0831648	0.292917	0.198924	0.119211	0.133783	0.163261
A0A2R8RUM2	A0A2R8RUM2|F1QZW7|A0A2R8RW79|F1QRI4	ilf3a	12	8	13.6	138.03	DANRE	93285.4	Interleukin enhancer-binding factor 3a	SUBCELLULAR LOCATION: Cytoplasm {ECO:0000256|ARBA:ARBA00004496}. Nucleus {ECO:0000256|ARBA:ARBA00004123}.	0.406621	0.00400843	0.022985	0.348526	0.0159158	0.0982426	0.00492136	0.969334	0.991695	0.0630165	0.596996	0.723287	-0.0172073	0.268206	-0.00764148	-0.247553	0.048868	-0.352795	0.286211	0.142923	-0.103867	-0.385411	0.349365	0.26562	-0.180356	0.216158	0.0797443
F1QSU4	F1QSU4	pdlim5b	42	17	46.1	373.02	DANRE	67661.6	PDZ and LIM domain 5b	NA	0.540669	0.00187302	0.014611	-0.0657017	0.668068	0.842253	-0.224184	0.158503	0.531266	0.382187	0.0164948	0.0663243	0.335089	0.272767	0.338925	-0.314852	-0.258715	-0.0587086	0.261432	0.307509	0.0207575	-0.218869	0.277225	0.492762	-0.286446	0.196955	-0.0725174
A0A0R4IS44	A0A0R4IS44	pdlim5b	6	5	56.8	170.9	DANRE	21837.5	PDZ and LIM domain 5b	NA	0.688454	0.000704292	0.00782245	0.358608	0.0525689	0.20421	0.609176	0.00312996	0.0659475	0.939022	4.42934e-05	0.00129431	0.262037	-0.195101	0.414183	-0.392154	0.406838	0.241011	0.686067	-0.0687547	0.025525	-0.69521	0.689985	0.406044	-0.87359	-0.201707	-0.85238
A0A140LGF7	A0A140LGF7	si:dkey-1k23.3	41	19	65.7	372.8	DANRE	39880.7	Si:dkey-1k23.3	NA	0.469323	0.108741	0.214506	-0.353937	0.250477	0.499772	0.0944778	0.753156	0.936939	0.917738	0.00510909	0.0292918	0.557673	-0.0935972	0.675035	-0.402597	0.348021	0.320598	0.574092	-0.405254	0.559844	-0.297995	-0.399062	1.01072	-0.402856	-0.192384	-0.454353
F1R9Y9	F1R9Y9	etfb	73	21	66.5	372.74	DANRE	27714	Electron transfer flavoprotein subunit beta	SUBCELLULAR LOCATION: Mitochondrion matrix {ECO:0000256|ARBA:ARBA00004305, ECO:0000256|PIRNR:PIRNR000090}.	0.495896	0.00704906	0.0336668	0.416387	0.0273482	0.13443	-0.0593267	0.728555	0.927188	0.0201818	0.898318	0.938269	0.125001	0.159576	-0.133039	-0.00355615	0.423247	-0.21237	-0.147371	0.431788	-0.383635	-0.372102	0.520253	0.311754	-0.234423	0.395694	-0.0746897
F1RDV2	F1RDV2|B0UYL0	ndufa10	55	21	58.3	372.48	DANRE	40515.9	NADH dehydrogenase [ubiquinone] 1 alpha subcomplex subunit 10, mitochondrial	SUBCELLULAR LOCATION: Mitochondrion matrix {ECO:0000256|ARBA:ARBA00004305, ECO:0000256|PIRNR:PIRNR000543}.	0.536736	0.00416023	0.0235573	1.24004	5.34981e-06	0.000807694	0.562827	0.00504837	0.0882004	-0.140475	0.379362	0.536428	-0.158596	-0.0898985	-0.544686	-0.161906	0.729216	-0.725829	0.414143	0.266894	-0.690365	-0.498477	0.987148	0.224655	-0.439035	0.187716	-0.458158
A3KQR0	A3KQR0	acadl	50	22	50.6	369.9	DANRE	49794.3	Long-chain specific acyl-CoA dehydrogenase, mitochondrial	SUBCELLULAR LOCATION: Mitochondrion matrix {ECO:0000256|ARBA:ARBA00004305}.	0.902525	5.14079e-05	0.00181228	0.178223	0.296788	0.553348	-0.230216	0.18382	0.571464	0.494087	0.00635579	0.0341543	0.333138	0.395127	0.15294	-0.304457	0.204011	-0.245739	-0.0510265	0.559256	0.0659657	-0.491484	0.611413	0.580948	-0.592908	0.404728	-0.281192
A0A2R8RP20	A0A2R8RP20|A0A286YA27|F1R0W9|F6PC33|A0A0R4IW36	dctn1a	42	29	26	369.58	DANRE	140884	Dynactin subunit 1	SUBCELLULAR LOCATION: Cytoplasm, cytoskeleton {ECO:0000256|ARBA:ARBA00004245}.	0.0408131	0.60407	0.714475	0.0112713	0.893988	0.956433	-0.049334	0.562228	0.862977	-0.0197922	0.800642	0.867841	0.0437705	0.218979	0.0925703	0.064477	0.00752195	0.161547	0.16981	0.097992	-0.0434822	0.0551405	0.0472859	0.0652643	0.158036	0.114592	0.0559202
B7ZD39	B7ZD39	ppa1b	48	18	69.7	368.68	DANRE	33237.7	Inorganic diphosphatase	NA	-0.201992	0.223252	0.352308	-0.143119	0.416509	0.660188	-0.205835	0.249037	0.65194	-0.264709	0.117686	0.247101	0.0875099	0.0130052	0.0751523	0.0442107	-0.0739801	0.159596	-0.192368	0.302722	-0.0344306	-0.0325634	0.0528629	0.101942	0.597626	0.121026	0.73739
A0A0R4IRJ2	A0A0R4IRJ2|F1QDB6	ppa2	14	10	43.6	190.58	DANRE	38945.9	Inorganic diphosphatase	NA	-0.449624	0.0383025	0.1043	0.0114337	0.957488	0.982984	-0.231987	0.290354	0.686131	-0.693044	0.00357355	0.023409	-0.176657	0.08465	-0.182479	0.0963506	-0.226753	-0.169154	-0.147578	0.00254286	-0.163457	0.0293953	-0.110178	0.0433467	0.878152	0.151396	1.07653
F1QFV2	F1QFV2|F1QS20|F1R2T6	hnrnpa1b	44	19	51.3	368.61	DANRE	40699.5	Heterogeneous nuclear ribonucleoprotein A1b	NA	0.645984	0.000671761	0.0077	0.251902	0.132076	0.349539	0.31493	0.0658597	0.344551	0.709012	0.00030829	0.0045043	0.183296	-0.0766907	0.113521	-0.62292	0.332282	0.0991303	0.254898	-0.119417	-0.00176586	-0.676638	0.46416	0.567849	-0.512227	-0.229674	-0.630082
E7FAQ8	E7FAQ8	hnrnpa1a	35	17	58.7	352.56	DANRE	38644.4	Heterogeneous nuclear ribonucleoprotein A1a	NA	0.47827	0.00360996	0.0214568	0.252499	0.106376	0.308287	0.281158	0.0755125	0.372513	0.50693	0.00241179	0.0179708	0.217454	0.10575	0.180045	-0.495305	0.0602323	0.0170456	0.578139	0.071367	0.105686	-0.389909	0.509298	0.369119	-0.4426	-0.140644	-0.179675
Q7T368	Q7T368|Q1LVS0	pdhb	83	18	69.3	368.45	DANRE	39650	Pyruvate dehydrogenase E1 component subunit beta	NA	0.860822	0.00011164	0.00270236	0.506322	0.010713	0.0761079	0.29168	0.109688	0.448789	0.64618	0.00126028	0.0115818	0.421412	0.196439	0.224789	-0.464555	0.618886	-0.222276	0.334361	0.439187	0.128571	-0.61808	0.980091	0.348317	-0.64448	0.42712	-0.30511
A2BHD8	A2BHD8|F1QUU0	hexb	36	16	46.2	368.27	DANRE	62045.3	Beta-hexosaminidase	SUBCELLULAR LOCATION: Lysosome {ECO:0000256|ARBA:ARBA00004371}.	-0.117132	0.511455	0.635137	0.207312	0.288796	0.543883	0.185523	0.340346	0.729705	-0.13892	0.437744	0.590843	-0.494927	-0.0327353	-0.207631	-0.417494	0.241694	-0.307504	-0.0857416	-0.50583	0.141752	0.0532848	-0.18525	0.00891547	-0.117313	-0.251507	0.168892
Q6P5J0	Q6P5J0|F1QTT5|Q3MHH8	amy2a	44	18	46.4	367.86	DANRE	57631.5	Alpha-amylase	NA	-2.23861	0.025621	0.0793206	-0.0549773	0.955112	0.982498	0.0693392	0.943406	0.987269	-2.1143	0.0333017	0.105917	-1.92848	-2.08994	-1.83257	1.36081	-0.0379719	0.0875423	-2.68607	-1.63941	-2.8642	1.60886	-2.34416	-3.2376	0.487641	-0.0680261	-1.53783
F1RD28	F1RD28|A0A0R4IST0|A0A1B0GWZ8|E9QG63|E9QG77	F1RD28	7	7	20.6	137.71	DANRE	59103.4	Alpha-amylase	NA	-0.307667	0.649748	0.751409	-0.428534	0.559224	0.772221	-0.242372	0.740006	0.931544	-0.121506	0.857175	0.910596	0.0913873	1.20961	0.212653	-1.08524	-0.794976	-0.718361	0.534151	-1.47426	0.657156	-0.600795	-0.84265	0.582749	1.24749	-0.819912	1.1674
Q7T358	Q7T358|A0A0J9YJC9	gspt1l	39	15	51.2	367.69	DANRE	64240.4	G1 to S phase transition 1	NA	0.0449886	0.663616	0.7623	-0.00286429	0.979469	0.990537	-0.0890346	0.429588	0.793605	-0.0411817	0.690359	0.79275	0.10873	0.107282	0.134503	-0.0262049	-0.134294	-0.225804	0.0732256	0.123532	0.0847449	-0.0329987	0.129106	0.121859	0.107249	0.094182	0.218855
Q68EH0	Q68EH0|A0A2R8RZF5	gspt1	15	10	42	293.45	DANRE	62934.2	G1 to S phase transition 1	NA	0.20138	0.13409	0.24764	-0.0402887	0.771785	0.899056	-0.184149	0.199118	0.594693	0.0575197	0.655432	0.769932	0.220058	0.0455243	0.245234	0.155301	-0.152088	-0.124706	0.132861	0.3253	-0.213844	0.00696922	-0.0065825	0.175709	-0.201499	0.15565	-0.0641076
F1Q883	F1Q883	pgd	48	24	55.7	367.68	DANRE	57038.3	6-phosphogluconate dehydrogenase, decarboxylating	NA	-0.574718	0.00846848	0.0377314	-0.303447	0.153131	0.378707	0.0225891	0.911739	0.981067	-0.248682	0.202169	0.354915	-0.143227	-0.00378546	0.0434453	0.0479646	0.0487231	0.721869	-0.1477	-0.0888503	0.184211	0.391329	-0.206642	-0.325937	0.649599	-0.0792742	0.712133
A0A2R8S036	A0A2R8S036|A0A2R8Q265|A0A0R4IPL8	cfhl4	38	19	54.9	367.35	DANRE	54086.2	Complement factor H-like 4	NA	-0.142316	0.643919	0.746664	0.441916	0.197032	0.43602	0.985627	0.00971264	0.127005	0.401395	0.205092	0.358459	0.287552	0.0148557	0.393857	-0.518644	0.122331	0.443273	1.42737	-0.646774	-0.0855065	-0.69595	0.555426	-0.0870225	0.376132	-0.41673	0.272056
A0A0R4IAG9	A0A0R4IAG9	cfhl5	8	6	17.9	75.79	DANRE	42635	Complement factor H-like 5 (Fragment)	NA	-0.241885	0.364417	0.499684	0.761921	0.0169721	0.102789	1.14166	0.00126953	0.0402569	0.137852	0.601186	0.726533	-0.3433	-0.787349	-0.208152	-0.1428	0.559778	0.628676	0.22951	-0.504263	-0.907025	-0.277785	0.874124	-0.645229	-0.373201	-0.411908	-0.587424
Q6PBZ1	Q6PBZ1|A0A2R8Q9K6	rpl7a	55	25	52.2	367.02	DANRE	30181.1	60S ribosomal protein L7a	NA	0.253594	0.296768	0.431759	0.33976	0.200645	0.440849	-0.415834	0.122974	0.472382	-0.502	0.0509668	0.142245	-0.151241	0.523634	-0.342195	-0.294227	-0.332123	-0.677704	0.384377	0.425921	-0.207762	-0.286873	-0.0671505	0.454169	0.711339	0.239752	0.49886
Q6DRD2	Q6DRD2|R4GEZ7	psmc6	50	25	65.5	366.82	DANRE	44509.5	26S protease regulatory subunit S10B	SUBCELLULAR LOCATION: Cytoplasm {ECO:0000256|ARBA:ARBA00004496}.	0.493606	0.00220387	0.0160395	0.448887	0.00693287	0.057541	0.00784052	0.956133	0.989967	0.0525592	0.691335	0.793439	-0.0432031	0.250093	-0.0887828	-0.227965	0.0885872	-0.166937	0.55689	0.302168	-0.253518	-0.51769	0.286854	0.396179	-0.0840463	0.263307	0.067024
E7EZ90	E7EZ90|Q6DHR6|X1WHL0|X1WF90	thop1	34	27	39.7	366.73	DANRE	81199.2	Thimet oligopeptidase 1	NA	-0.328874	0.173358	0.295603	-0.378233	0.149062	0.373236	-0.471639	0.0781862	0.379386	-0.42228	0.0873147	0.20453	-0.0464765	0.212413	-0.0337928	-0.0464878	-0.470354	-0.290225	-0.403001	0.0209669	0.371108	-0.0468115	-0.260883	0.151617	0.695434	-0.0107573	1.0876
A0A0R4IUB7	A0A0R4IUB7|A5WVX8	metap2b	31	23	57.3	366.34	DANRE	54065.1	Methionine aminopeptidase 2	SUBCELLULAR LOCATION: Cytoplasm {ECO:0000256|HAMAP-Rule:MF_03175}. Note=About 30% of expressed METAP2 associates with polysomes. {ECO:0000256|HAMAP-Rule:MF_03175}.	0.523358	0.000966837	0.0095658	0.82683	3.3036e-05	0.00215061	0.338507	0.0244732	0.212208	0.035034	0.780247	0.854794	0.0510625	0.205834	-0.242564	-0.0560404	0.573393	-0.33854	0.448882	0.351414	-0.287186	-0.121153	0.845295	0.219801	-0.446557	0.359018	-0.333613
F1Q6S1	F1Q6S1	npepl1	52	23	55	364.46	DANRE	56521.3	Aminopeptidase-like 1	NA	0.0162995	0.918012	0.947626	-0.329827	0.0712506	0.24526	-0.0210924	0.901858	0.979189	0.325034	0.0567818	0.152695	0.591333	0.225022	0.541384	-0.115547	-0.137277	0.135102	0.210685	0.0953991	0.291675	-0.246429	0.106732	-0.00258414	0.17276	0.00671976	0.448574
B0UYD6	B0UYD6|B0UYD5	qars1	36	24	38.3	364.36	DANRE	88635	Glutaminyl-tRNA synthetase	NA	-0.0531131	0.668753	0.766257	0.0191687	0.88595	0.951042	-0.14823	0.278607	0.67703	-0.220512	0.0925154	0.211936	-0.169055	0.25237	-0.065373	0.0829885	-0.162751	0.256193	0.143481	0.196478	0.0166201	0.0434875	0.105565	0.143424	0.342595	0.115708	0.451362
B0UYD7	B0UYD7	B0UYD7	2	2	22.3	39.17	DANRE	25555	Glutaminyl-tRNA synthetase 1 (Fragment)	NA	-1.63807	0.000918029	0.00928803	-0.697333	0.115458	0.323734	0.145749	0.729861	0.927188	-0.794986	0.0582479	0.155189	0.0738386	-0.949138	-0.402694	1.39706	-0.685984	0.0594259	-1.09089	-1.01447	-0.365103	1.49229	-0.79102	-1.40881	0.294819	-0.634446	-0.638754
A0A0A0MPG9	A0A0A0MPG9|Q7ZUN6	A0A0A0MPG9	48	24	28.4	364.27	DANRE	119658	AIR carboxylase	NA	-0.549297	0.0736337	0.164085	-0.286199	0.364697	0.612635	0.00411568	0.989425	0.996971	-0.258982	0.375289	0.53273	0.129089	-0.090559	0.068665	-0.17038	-0.0110802	-0.0912075	-0.234192	-0.100629	0.488794	-0.297228	-0.166819	-0.311804	0.905092	-0.0629269	1.19378
X1WET9	X1WET9|F1QX66|F1RA36	eif3ba	33	21	39.9	363.43	DANRE	80103.2	Eukaryotic translation initiation factor 3 subunit B	SUBCELLULAR LOCATION: Cytoplasm {ECO:0000256|HAMAP-Rule:MF_03001, ECO:0000256|PIRNR:PIRNR036424}.	0.194107	0.124947	0.235347	0.046035	0.724355	0.873602	-0.187322	0.166532	0.546942	-0.0392503	0.745268	0.830618	-0.000766532	0.328661	0.0356557	-0.144042	-0.0740043	-0.103004	0.211036	0.214548	0.170811	-0.133786	0.0780956	0.321578	0.251769	0.171336	0.285756
Q6GQL7	Q6GQL7|A0A2R8Q5D9|A0A140LFQ9	fhl1a	53	22	66.3	362.84	DANRE	36155.5	Fhla protein	NA	0.659654	0.00634069	0.031221	0.957148	0.000775349	0.0148087	0.389275	0.0987854	0.425392	0.0917801	0.657901	0.771261	-0.216256	0.430302	-0.143822	-0.54898	0.278081	-0.663223	1.04539	-0.103992	-0.294923	-0.527025	0.559304	0.624741	-0.506077	0.00221943	-0.103262
E7FAL7	E7FAL7|Q6DBU4	E7FAL7	50	27	50.8	362.61	DANRE	56721.7	Zgc:92380	NA	0.250613	0.213473	0.339821	-0.408029	0.0704263	0.243637	0.117782	0.578771	0.869682	0.776424	0.00140161	0.0124109	0.484516	0.0336538	0.512399	-0.271895	0.350534	0.894173	0.475725	0.230047	0.331426	-0.251446	-0.383462	-0.367436	-0.175956	0.223003	-0.183886
Q803F6	Q803F6|J9JI05	rpsa	57	20	63.3	362.43	DANRE	34182.9	40S ribosomal protein SA	SUBCELLULAR LOCATION: Cell membrane {ECO:0000255|HAMAP-Rule:MF_03016}. Cytoplasm {ECO:0000255|HAMAP-Rule:MF_03016}. Nucleus {ECO:0000255|HAMAP-Rule:MF_03016}. Note=67LR is found at the surface of the plasma membrane, with its C-terminal laminin-binding domain accessible to extracellular ligands. 37LRP is found at the cell surface, in the cytoplasm and in the nucleus. {ECO:0000255|HAMAP-Rule:MF_03…	0.44734	0.235916	0.365903	0.111564	0.77859	0.902896	-0.496704	0.223777	0.622453	-0.160928	0.662063	0.773328	0.071542	0.72516	0.0881186	-0.62744	-0.477332	-0.806556	0.395122	0.520362	0.270383	-0.654244	0.134519	0.461246	0.633101	0.349793	0.915783
Q5RH26	Q5RH26	atp5f1c	101	20	70.2	362.43	DANRE	32318.8	ATP synthase subunit gamma	NA	1.3057	0.000977407	0.00962545	1.47867	0.000670363	0.0137029	-0.00965217	0.97724	0.993871	-0.182628	0.562507	0.6958	0.0260135	0.341856	-0.597643	-0.30989	0.398028	-1.4246	0.447765	0.668725	-1.64773	-0.716719	0.857256	0.640778	-1.13187	0.657982	-0.754967
Q5RI09	Q5RI09	tprb	32	31	14.4	361.99	DANRE	266319	Nucleoprotein TPR	NA	-0.263806	0.00919794	0.039723	0.0698649	0.466129	0.698918	-0.0115694	0.902936	0.979416	-0.34524	0.00152898	0.0132449	-0.0950423	-0.115622	-0.06245	0.4289	-0.0407108	-0.121813	-0.100748	-0.0787907	-0.238908	0.112303	-0.0376069	-0.0308825	0.188291	0.032818	0.133252
E7F4R9	E7F4R9	idh2	156	21	81.3	361.57	DANRE	25672.8	IDP	NA	0.689772	0.00287798	0.0187394	0.649673	0.00704776	0.0581142	0.191085	0.3636	0.743856	0.231184	0.240433	0.395379	0.201761	0.172985	-0.00948386	-0.0090413	0.6231	-0.208139	0.108429	0.453041	-0.460085	-0.531958	0.860531	0.241797	-0.570668	0.490583	-0.289016
Q503K1	Q503K1	tgfbi	36	23	45.7	361.26	DANRE	74816.6	Transforming growth factor-beta-induced protein ig-h3	SUBCELLULAR LOCATION: Secreted, extracellular space, extracellular matrix {ECO:0000256|ARBA:ARBA00004498}.	0.200391	0.255957	0.387602	-0.380491	0.0571069	0.214905	-0.2633	0.172046	0.553866	0.317582	0.0823806	0.196677	0.477061	0.216345	0.440322	-0.0284615	-0.415722	0.171498	0.533124	0.168653	0.28201	0.176688	-0.230708	0.382893	-0.027263	0.134235	-0.0204028
Q6PC68	Q6PC68	atp6v1ba	39	8	50	361.02	DANRE	56327.2	Vacuolar proton pump subunit B	NA	0.0398332	0.812274	0.871943	0.161708	0.379006	0.624318	-0.0960357	0.597682	0.878854	-0.217911	0.207902	0.361946	-0.0914912	0.428174	-0.0732316	-0.194783	-0.169368	-0.217741	0.229492	-0.0270618	-0.0517242	-0.148999	0.0993591	0.18279	0.22907	0.0128838	0.552165
A4FUM8	A4FUM8|F6P5H1	atp6v1b2	5	4	37.9	253.77	DANRE	56819	Vacuolar proton pump subunit B	NA	-0.282563	0.0119265	0.0473122	-0.159379	0.15062	0.374961	-0.216674	0.0583533	0.326923	-0.339859	0.00383837	0.024218	-0.102197	0.153657	-0.0352955	0.191686	-0.0736735	0.193301	-0.223972	0.131842	0.0924535	0.368592	-0.0692949	-0.0158604	0.532733	0.107805	0.414686
B2GTW6	B2GTW6|Q7ZVY5	cs	112	20	44	360.6	DANRE	52010.7	Citrate synthase	SUBCELLULAR LOCATION: Mitochondrion matrix {ECO:0000256|ARBA:ARBA00004305}.	0.857969	9.73765e-05	0.00249423	0.415284	0.0272344	0.134156	0.110842	0.517765	0.844221	0.553527	0.00338344	0.0226238	0.330218	0.319926	0.0888899	-0.169268	0.420037	-0.307128	0.273769	0.371417	0.117795	-0.61281	0.724377	0.342454	-0.760741	0.413746	-0.441514
A0A0R4IN46	A0A0R4IN46|A0A2R8QKL9|F8W5T1	tgm1l1	42	28	37.9	359.9	DANRE	91774.6	Transglutaminase 1-like 1 (Fragment)	NA	0.00120607	0.990907	0.992472	-0.146014	0.21567	0.458914	-0.524203	0.00045103	0.0241428	-0.376983	0.00310835	0.0212164	-0.043973	0.345212	-0.222464	0.227839	-0.279783	-0.176476	-0.114111	0.110344	-0.274457	0.248438	-0.582174	0.135563	0.145228	0.204269	0.169059
A2AWA1	A2AWA1|A2AWA0	ddx39aa	43	8	60.6	359.8	DANRE	49502.9	RNA helicase	NA	0.360467	0.0101794	0.0424162	0.199809	0.146691	0.369849	0.0515098	0.696973	0.918007	0.212168	0.100167	0.222267	0.238534	0.264964	0.24288	-0.124655	0.0939042	-0.243887	0.366555	0.264588	0.178499	-0.248029	0.450987	0.258783	-0.087069	0.220887	0.0271052
Q803W0	Q803W0|F6NVB9	ddx39ab	15	9	57.3	333.18	DANRE	49517	RNA helicase	NA	0.442832	0.0105043	0.0433147	0.0354317	0.82797	0.92379	-0.0944048	0.564832	0.86477	0.312995	0.0544976	0.148632	0.176045	0.436899	0.271517	-0.299946	-0.0981637	-0.0703274	0.427072	0.244679	0.417502	-0.206071	0.373439	0.354502	-0.162849	0.278002	0.211621
Q7SXU7	Q7SXU7	ddx39b	8	5	29.4	169.19	DANRE	50115.5	RNA helicase	NA	0.0285783	0.823569	0.879898	0.0367498	0.790756	0.907381	-0.134262	0.340585	0.729705	-0.142433	0.277486	0.434347	-0.376173	-0.124232	-0.162723	0.10116	0.00509474	0.181942	0.0144177	0.0231718	-0.00173452	-0.0547495	-0.17828	0.12567	0.0260952	0.300746	0.138537
Q5TYX2	Q5TYX2|A0A2R8Q3Z8|A0A2R8QJM9	zpax1	53	26	29.6	359.3	DANRE	105942	Zona pellucida protein AX 1	NA	-1.90417	0.0744807	0.165333	-1.23053	0.266514	0.518336	-0.804726	0.461147	0.814714	-1.47836	0.155921	0.298516	-2.13162	-0.832025	-1.64241	-1.23164	-1.75939	-1.16384	-1.88834	-1.98723	1.58064	-1.16485	-2.56179	-0.258947	2.20815	-1.98226	2.74454
F1Q555	F1Q555|F1R2R0|A0A2R8Q776	gpd2	36	27	40.7	359.3	DANRE	81050.3	Glycerol-3-phosphate dehydrogenase, mitochondrial	NA	0.3745	0.00922391	0.0397333	0.306049	0.0377456	0.165522	-0.0207967	0.877358	0.972094	0.0476547	0.703193	0.802719	0.224853	0.131253	0.0302218	-0.0375332	0.283727	-0.221575	0.160959	0.255897	-0.362326	-0.00247027	0.226841	0.258668	-0.299923	0.332739	-0.179518
A0A0R4IJP7	A0A0R4IJP7|A0A0R4ISB0	znf185	41	27	29.6	359.24	DANRE	117300	Zinc finger protein 185 with LIM domain	NA	0.262815	0.143254	0.259949	-0.250102	0.193036	0.431457	0.0738153	0.691801	0.914995	0.586732	0.00414101	0.0255429	0.83749	0.0594841	0.719434	-0.272398	0.167952	-0.108622	0.100695	0.119611	0.182705	-0.179466	0.204302	0.0203808	-0.192911	0.135862	-0.0711455
Q6PC13	Q6PC13	phb2a	56	13	79.1	358.76	DANRE	33357	Prohibitin	SUBCELLULAR LOCATION: Cell membrane {ECO:0000256|ARBA:ARBA00004236}. Mitochondrion inner membrane {ECO:0000256|ARBA:ARBA00004273, ECO:0000256|RuleBase:RU366048}.	0.227097	0.223781	0.352863	0.29525	0.148187	0.372057	0.150065	0.448364	0.805182	0.0819113	0.652447	0.767617	0.361951	0.254818	0.0536869	-0.113299	0.429223	-0.238888	0.0252605	0.172749	0.0146066	-0.467272	0.574785	0.289179	0.142382	0.0553529	0.3019
F1R9C6	F1R9C6|A0A2R8QL65|A0A0R4IPS0	phb2b	22	10	66.6	299.18	DANRE	33784.5	Prohibitin	SUBCELLULAR LOCATION: Cell membrane {ECO:0000256|ARBA:ARBA00004236}. Mitochondrion inner membrane {ECO:0000256|ARBA:ARBA00004273, ECO:0000256|RuleBase:RU366048}.	0.17307	0.198477	0.322328	0.144501	0.313881	0.56915	-0.401475	0.0122755	0.14129	-0.372905	0.012055	0.0531576	-0.18853	0.310992	-0.173962	0.183391	0.109866	-0.199386	-0.515207	0.341771	-0.410273	0.173689	0.10973	0.357851	0.0591483	0.201138	0.103243
A0A0R4IAH3	A0A0R4IAH3|A0A0R4IG25|A0A0R4IG15|A0A0R4IVE3	eci2	44	19	57.9	358.63	DANRE	43409.2	Enoyl-CoA delta isomerase 2	NA	0.651163	0.00337626	0.0207081	0.514662	0.0211579	0.11707	-0.0115099	0.954074	0.989685	0.124991	0.50319	0.648277	0.238628	0.282053	-0.31091	-0.0036931	0.319768	-0.0674945	0.205812	0.111909	-0.708223	-0.299407	0.382407	0.465814	-0.507423	0.396913	-0.537441
Q6PC77	Q6PC77	atp5pd	122	22	87.5	358.6	DANRE	18257.5	ATP synthase subunit d, mitochondrial	SUBCELLULAR LOCATION: Mitochondrion inner membrane {ECO:0000256|PIRNR:PIRNR005514}.	1.18334	0.000445131	0.00606788	0.940703	0.00442131	0.0432362	-0.233113	0.408685	0.778577	0.00952286	0.970515	0.982759	0.175501	0.375882	-0.306182	-0.274368	0.177968	-1.06685	0.284762	0.850822	-0.908166	-0.787154	0.78011	0.712157	-0.770143	0.650711	-0.31212
A0A0R4IJ30	A0A0R4IJ30|A0A2R8Q0F5|A0A2R8Q487|Q5U3A7|A0A0R4ILJ7	opa1	37	26	28.8	355.73	DANRE	119030	Dynamin-like 120 kDa protein, form S1	SUBCELLULAR LOCATION: Membrane {ECO:0000256|ARBA:ARBA00004167}; Single-pass membrane protein {ECO:0000256|ARBA:ARBA00004167}. Mitochondrion inner membrane {ECO:0000256|ARBA:ARBA00004434}; Single-pass membrane protein {ECO:0000256|ARBA:ARBA00004434}. Mitochondrion membrane {ECO:0000256|ARBA:ARBA00004325}.	0.340775	0.00302316	0.019308	0.154471	0.150201	0.374382	-0.367986	0.00302844	0.0649929	-0.181682	0.0741444	0.182582	0.0178351	0.239416	-0.211834	0.0792005	-0.0271038	-0.216575	-0.138695	0.393513	-0.341225	0.00997638	0.0653623	0.269822	-0.0908445	0.435277	-0.0234035
A0A0R4IIR1	A0A0R4IIR1|T1SXK0|Q4V8Z7|A5WVX3	dnm2a	36	8	34	354.84	DANRE	97387.7	Dynamin GTPase	NA	0.0786761	0.366616	0.501527	0.0740602	0.429594	0.669959	0.00260965	0.977513	0.993871	0.00722549	0.932831	0.959692	0.0371211	0.140203	0.199864	-0.0321287	0.0284823	-0.103887	0.197143	0.173076	0.119217	0.0709589	0.185792	0.113913	0.0372967	0.110926	0.147286
A0A0R4IG45	A0A0R4IG45|F8W429	A0A0R4IG45	6	6	25.7	256.15	DANRE	95042.8	Dynamin GTPase	NA	0.223545	0.135232	0.249184	0.448419	0.011193	0.0779084	0.00885801	0.954261	0.989685	-0.216017	0.147742	0.288523	-0.216684	0.0111867	-0.206167	0.26141	0.304155	-0.379475	-0.0500883	0.238124	-0.458073	-0.0165152	0.145893	0.251549	-0.258653	-0.00301224	-0.382574
A0A0G2KXI9	A0A0G2KXI9	dnm2b	10	7	40.5	260.38	DANRE	50262.8	Dynamin GTPase	NA	-0.368394	0.0426496	0.11181	-0.273884	0.14571	0.368842	-0.169445	0.355614	0.737981	-0.263954	0.131202	0.26667	0.211209	-0.0982196	0.231021	0.198361	-0.274851	-0.135962	-0.368594	-0.289193	-0.679456	0.0868779	-0.458098	-0.224698	0.155296	-0.178834	0.242095
Q5RHR9	Q5RHR9	dnm3a	4	3	14.6	167.63	DANRE	93757.3	Dynamin GTPase	NA	0.627305	0.149207	0.266841	-0.148805	0.741555	0.88202	-0.342021	0.452617	0.807547	0.434089	0.30788	0.465046	0.367206	0.633766	0.513134	-0.842307	-0.76969	-0.511139	0.659347	0.606065	0.502511	-0.643058	0.317712	0.693255	-0.220923	-0.28851	0.841645
A0A2R8PX39	A0A2R8PX39	A0A2R8PX39	8	5	66.8	128.92	DANRE	17388.6	Dynamin-type G domain-containing protein	NA	-0.284882	0.0197926	0.0664856	-0.46947	0.00139014	0.0213874	-0.148017	0.223181	0.62134	0.0365704	0.738163	0.82676	0.383517	0.178024	0.422473	0.293076	-0.364104	0.321297	0.0234473	0.119514	0.367842	0.472541	0.0535955	0.00923517	0.199317	-0.0974548	0.383915
A0A0R4INZ8	A0A0R4INZ8|A0A2R8Q4A3	dbt	55	24	48.1	353.87	DANRE	58849.2	Dihydrolipoamide acetyltransferase component of pyruvate dehydrogenase complex (Fragment)	NA	0.772356	6.06767e-05	0.00194349	0.489095	0.00458387	0.0441737	-0.199658	0.18544	0.57425	0.0836038	0.537911	0.675157	0.0718409	0.356835	-0.212563	-0.297258	0.219455	-0.387851	0.13372	0.507301	-0.295335	-0.52328	0.496178	0.54548	-0.3384	0.521485	0.00061505
Q7ZU69	Q7ZU69	psmd13	47	21	56.6	352.04	DANRE	43420.4	26S proteasome non-ATPase regulatory subunit 13	NA	-0.128796	0.236758	0.366762	-0.105629	0.363383	0.612241	-0.130573	0.265238	0.665385	-0.153741	0.162608	0.307243	0.216047	0.243145	0.0840758	0.141985	-0.00616323	0.061037	0.0927584	0.177579	0.14081	0.0470715	-0.027005	0.0609652	0.449778	0.120058	0.478098
A0A0R4IMZ8	A0A0R4IMZ8	kpnb1	38	23	29.2	351.64	DANRE	98721	Karyopherin (importin) beta 1	SUBCELLULAR LOCATION: Cytoplasm {ECO:0000256|ARBA:ARBA00004496}.	-0.317529	0.0363241	0.10126	-0.0450627	0.76368	0.89391	-0.0561517	0.708211	0.922855	-0.328618	0.0312081	0.101735	0.00639929	0.104081	0.0528653	0.169129	-0.1491	-0.0102194	0.113736	0.0330431	0.13669	0.0546185	0.0394776	0.161383	0.548209	-0.0684165	0.728251
A3KQX1	A3KQX1	cndp2	50	23	53.1	351.44	DANRE	53628.5	Carnosine dipeptidase 2	NA	-0.222284	0.18013	0.303421	0.0839625	0.628433	0.818757	-0.103098	0.553303	0.859639	-0.409345	0.021775	0.0799048	-0.132636	0.440291	-0.102999	-0.0459042	-0.162513	-0.234378	0.0464142	-0.177404	-0.0763657	0.235027	-0.0417973	0.0211057	0.215574	-0.0821267	0.686306
Q5RIN3	Q5RIN3|Q5RIN4	txlnba	37	26	31.9	351.44	DANRE	90937	Taxilin beta a	NA	1.02019	1.49841e-05	0.000888124	0.192396	0.260834	0.51237	-0.123202	0.46488	0.816468	0.704598	0.000469798	0.00592244	0.289023	0.330738	0.124806	-0.306431	0.142754	-0.0568838	0.54345	0.442367	0.0731492	-0.401468	0.213553	0.668306	-0.862874	0.251072	-0.817524
Q6PBY1	Q6PBY1	rps3a	57	22	63.2	351.29	DANRE	30426.9	40S ribosomal protein S3a	SUBCELLULAR LOCATION: Cytoplasm {ECO:0000255|HAMAP-Rule:MF_03122}.	-0.198392	0.406832	0.539325	0.303497	0.246389	0.494867	-0.325792	0.215194	0.610904	-0.827681	0.00344498	0.0228262	-0.21613	0.406483	-0.330193	-0.0879225	-0.320356	-0.792053	0.152345	0.188438	-0.285944	-0.0109103	-0.139739	0.0832713	0.972536	0.214643	0.812701
A0A0G2KSV9	A0A0G2KSV9	A0A0G2KSV9	40	30	41.1	351.17	DANRE	109123	MIF4G domain-containing protein	NA	-0.0487377	0.670193	0.76666	0.0430052	0.727586	0.875783	-0.130913	0.29839	0.694455	-0.222656	0.0682305	0.172102	0.00698753	0.14055	0.0697924	0.0439359	-0.105942	-0.163182	0.145554	0.19759	0.0231409	-0.0076296	0.0419578	0.142932	0.30148	0.151339	0.489576
E7FE19	E7FE19|A0A2R8Q784|A0A0R4IRJ5|A0A0R4IMW7|A0A0R4IU23|A0A0R4IPC8|A0A0R4IAJ6|A0A0R4ITR6	cnp	42	19	66	350.95	DANRE	46804.8	2',3'-cyclic nucleotide 3' phosphodiesterase	NA	-0.198044	0.518307	0.641636	-0.362185	0.28136	0.535928	-0.42754	0.20748	0.602595	-0.263398	0.393269	0.548023	0.158102	0.403177	-0.0535391	-0.267243	-0.435755	-0.198808	0.296449	0.0820144	0.477465	-0.144239	-0.659834	0.0878244	0.748796	0.0716223	1.0995
A0A2R8Q740	A0A2R8Q740|F6NHI0|E7FDY7	g6pd	45	26	52.4	350.86	DANRE	60803.2	Glucose-6-phosphate 1-dehydrogenase	NA	-0.00428537	0.983246	0.986743	0.00373002	0.986499	0.993622	0.546413	0.025467	0.214776	0.538398	0.0187395	0.0724599	-0.0175912	-0.331692	0.196455	-0.129178	0.617206	1.05264	0.152756	-0.0859438	0.108203	-0.430998	0.246011	-0.213369	-0.159439	-0.200018	-0.0942669
B8JIS8	B8JIS8	gstm.1	82	10	77.1	350.11	DANRE	26460.8	Glutathione transferase	NA	-0.14688	0.618953	0.727599	-0.088096	0.781689	0.904238	-0.0760597	0.810833	0.953036	-0.134844	0.647717	0.763841	0.0872411	0.0254153	0.197578	-0.414949	-0.129011	0.0835061	0.102048	0.0107855	-0.121174	-0.55908	-0.0519617	0.130048	0.701495	0.032758	1.05906
A8KBR8	A8KBR8	gstm.2	25	9	73	275.21	DANRE	26518	Glutathione transferase	NA	0.0675709	0.768871	0.840576	-0.102953	0.679022	0.847574	-0.0114471	0.963177	0.990831	0.159077	0.492446	0.639035	0.178223	0.184689	0.464371	-0.438832	-0.162339	-0.0290649	0.398862	0.0868087	0.287289	-0.344154	0.130232	0.17156	0.338525	0.0917377	0.708973
B8JIS5	B8JIS5|B8JIS6	gstm.3	21	11	70.3	257.39	DANRE	26211.5	Glutathione transferase	NA	0.0665772	0.803157	0.865527	0.00404536	0.988798	0.99386	-0.149186	0.606554	0.882206	-0.0866546	0.745824	0.830722	0.414912	0.522197	0.323081	-0.320803	-0.177518	-0.170705	0.156944	0.131585	-0.205434	-0.151198	0.304101	-0.278521	0.456678	0.599521	0.723796
F1R1C0	F1R1C0|Q0P4F7|E9QDF8|E9QEB7|E9QHF9	acsf2	38	20	42.2	348.62	DANRE	68771.1	Medium-chain acyl-CoA ligase ACSF2, mitochondrial	NA	-0.542028	0.0228608	0.0732979	-0.0871571	0.706669	0.864046	-0.557965	0.0287178	0.227408	-1.01284	0.000342644	0.0047647	-0.253628	-0.133767	-0.424425	0.904575	-0.338894	-0.76129	-0.69164	0.333068	-0.307921	0.880608	-0.541385	-0.139338	0.622406	0.0760061	-0.103506
Q9PVK4	Q9PVK4	ldhba	90	12	58	347.82	DANRE	36417.4	L-lactate dehydrogenase B-A chain	SUBCELLULAR LOCATION: Cytoplasm {ECO:0000250}.	0.328596	0.019977	0.0669632	0.0601708	0.659984	0.837899	-0.00237236	0.986107	0.995993	0.266053	0.0511842	0.142513	0.304517	0.201708	0.291831	-0.195499	0.200873	0.0312836	0.113744	0.241755	0.0552885	-0.370843	0.378086	0.261846	-0.0456578	0.227783	0.230709
Q9PVK5	Q9PVK5	ldha	56	14	51.6	297.58	DANRE	36530.7	L-lactate dehydrogenase A chain	SUBCELLULAR LOCATION: Cytoplasm {ECO:0000250}.	0.382665	0.0447321	0.115887	-0.0799158	0.674252	0.846249	0.471129	0.0250873	0.213968	0.93371	0.000121742	0.0024585	0.668249	0.0803496	0.862537	-0.553558	0.373022	0.241442	0.421363	0.0350566	0.435609	-0.688993	0.621745	-0.262917	-0.330796	0.151169	0.0463439
Q6DGK2	Q6DGK2|E9QGA6|E9QH54	ldhbb	12	5	35	192.38	DANRE	36880.1	L-lactate dehydrogenase B-B chain	SUBCELLULAR LOCATION: Cytoplasm {ECO:0000250|UniProtKB:P07195}.	-2.37635	0.0187908	0.0642086	1.47309	0.147143	0.370398	0.000759946	0.999377	0.999815	-3.84868	0.000807466	0.00854782	-2.10141	-2.40982	-2.25635	1.69217	-2.52188	-5.13098	-2.00472	-1.89013	-5.36119	1.54203	-2.19157	-2.79786	-0.659615	-1.8628	-2.02981
F1Q740	F1Q740	vars1	36	27	21	347.56	DANRE	145033	Valyl-tRNA synthetase	NA	-0.026767	0.839363	0.892712	-0.0484563	0.734432	0.879017	-0.192895	0.191137	0.583066	-0.171205	0.208915	0.363338	-0.0642376	0.210409	0.00936783	-0.0910359	-0.109942	-0.0558218	0.015539	0.114716	0.16474	-0.0735404	-0.0104302	0.188419	0.441987	0.118258	0.46146
A0A140LGU1	A0A140LGU1|E7FAZ5|A0A0R4IWH8	hp1bp3	38	23	40	347.4	DANRE	67287.2	Heterochromatin protein 1-binding protein 3	NA	0.788598	0.00573025	0.0292315	0.420018	0.126855	0.34041	-0.0195938	0.940463	0.986217	0.348986	0.166951	0.313028	0.0970231	-0.00320073	-0.191128	-0.368124	-0.221323	-0.315372	0.863152	0.47655	-0.404755	-0.319699	0.00755054	0.589788	-0.6598	-0.118922	-0.862556
Q6TLG8	Q6TLG8	rps3	72	24	75.9	347.08	DANRE	27049.2	DNA-(apurinic or apyrimidinic site) lyase	SUBCELLULAR LOCATION: Cytoplasm, cytoskeleton, spindle {ECO:0000256|ARBA:ARBA00004186}. Membrane {ECO:0000256|ARBA:ARBA00004170}; Peripheral membrane protein {ECO:0000256|ARBA:ARBA00004170}. Mitochondrion inner membrane {ECO:0000256|ARBA:ARBA00004637}; Peripheral membrane protein {ECO:0000256|ARBA:ARBA00004637}.	0.224138	0.285526	0.419961	0.165433	0.460092	0.693353	-0.192009	0.393015	0.767396	-0.133303	0.519173	0.660396	0.0184542	0.469069	0.055151	-0.255147	-0.126637	-0.398456	0.362721	0.250648	0.187062	-0.291657	0.156873	0.435668	0.468661	0.136594	0.473568
F6NZP4	F6NZP4	esyt1b	30	25	18.8	346.95	DANRE	175590	Extended synaptotagmin-like protein 1b	SUBCELLULAR LOCATION: Cell membrane {ECO:0000256|ARBA:ARBA00004202}; Peripheral membrane protein {ECO:0000256|ARBA:ARBA00004202}. Endoplasmic reticulum membrane {ECO:0000256|ARBA:ARBA00004477}; Multi-pass membrane protein {ECO:0000256|ARBA:ARBA00004477}. Membrane {ECO:0000256|ARBA:ARBA00004141}; Multi-pass membrane protein {ECO:0000256|ARBA:ARBA00004141}. Membrane {ECO:0000256|ARBA:ARBA00004170};…	-0.0164627	0.921572	0.950498	-0.204886	0.268411	0.520488	0.238455	0.201482	0.596361	0.426878	0.0220732	0.0805791	0.521109	0.0722484	0.554526	-0.184199	-0.0129141	-0.166431	0.368482	-0.144646	0.488277	-0.035957	0.0778844	0.0727797	0.00781564	-0.376265	-0.0976919
Q8AW07	Q8AW07	psmd12	49	25	51.5	346.94	DANRE	53212.3	Proteasome (Prosome, macropain) 26S subunit, non-ATPase, 12	NA	0.591711	0.000149767	0.00328658	0.399643	0.00565623	0.0503031	0.0763237	0.537453	0.852871	0.268391	0.0319371	0.103113	0.0256657	0.279217	-0.0438479	-0.427758	0.195491	-0.220011	0.567685	0.191164	-0.0096491	-0.503495	0.249871	0.201279	-0.268395	0.373775	-0.121761
Q6TH15	Q6TH15|Z4YIM6|I3ITC9|I3ITA1	eif3d	31	22	51.4	346.18	DANRE	64773.4	Eukaryotic translation initiation factor 3 subunit D	SUBCELLULAR LOCATION: Cytoplasm {ECO:0000255|HAMAP-Rule:MF_03003}.	0.231292	0.196307	0.319964	0.0428236	0.818932	0.919153	-0.315551	0.109145	0.448429	-0.127082	0.46739	0.617313	0.208452	0.54057	0.00480694	-0.0830502	-0.155904	-0.410111	0.245005	0.383768	0.277057	-0.104482	0.0995222	0.302133	0.359506	0.287231	0.41656
A0A0R4IXA9	A0A0R4IXA9	cap2	39	21	52.3	344.7	DANRE	51943.1	Adenylyl cyclase-associated protein	SUBCELLULAR LOCATION: Cell membrane {ECO:0000256|ARBA:ARBA00004202}; Peripheral membrane protein {ECO:0000256|ARBA:ARBA00004202}.	1.05969	1.17012e-05	0.00078946	0.595016	0.00337864	0.0372591	0.0481912	0.775984	0.944042	0.512861	0.00541483	0.0304933	-0.0161414	0.226964	-0.115125	-0.3858	0.160087	-0.131061	0.934089	0.486745	-0.153098	-0.789577	0.379303	0.404207	-0.62164	0.653958	-0.669852
Q6NXA6	Q6NXA6	adh5	52	20	55.3	344.4	DANRE	40773.2	S-(hydroxymethyl)glutathione dehydrogenase	NA	-0.168572	0.374588	0.50892	-0.29488	0.160457	0.388787	-0.389809	0.0709093	0.359281	-0.263501	0.174406	0.321111	0.136826	0.0140009	0.0923853	-0.128606	-0.268758	-0.135041	-0.128366	0.241552	0.0901019	-0.052909	-0.349312	0.217309	0.615921	0.0911258	0.803869
Q7ZVZ6	Q7ZVZ6|F1QNA0|A0A2R8QU26	Q7ZVZ6	36	28	26.8	344.24	DANRE	115826	Presequence protease, mitochondrial	NA	0.355951	0.00167753	0.0135874	0.287801	0.0111249	0.0779084	-0.117275	0.248946	0.65194	-0.0491248	0.594128	0.721303	0.0530458	0.194367	-0.183514	-0.00367539	0.184773	-0.146375	0.0650059	0.403524	-0.144036	-0.201335	0.297966	0.315098	-0.0359878	0.286437	0.0166189
A0A0R4IH79	A0A0R4IH79	lonp1	38	18	27.7	343.61	DANRE	108300	Lon protease homolog, mitochondrial	SUBCELLULAR LOCATION: Mitochondrion matrix {ECO:0000256|ARBA:ARBA00004305, ECO:0000256|HAMAP-Rule:MF_03120}.	0.0723646	0.503331	0.628	0.0019308	0.98669	0.993622	-0.0857746	0.463498	0.815509	-0.0153407	0.886204	0.930676	0.19351	0.157479	0.0629217	0.121216	0.196642	0.0955773	-0.153674	0.259818	0.0368455	-0.103614	0.254466	0.165504	0.187261	0.156875	0.245354
A0A0R4IPW4	A0A0R4IPW4	A0A0R4IPW4	2	2	31.9	98.42	DANRE	28697.4	Lon peptidase 1, mitochondrial (Fragment)	NA	-0.757031	0.000476385	0.00628797	-0.587541	0.00544226	0.0490887	0.159992	0.380136	0.758358	-0.00949701	0.954424	0.973418	-0.0334709	-0.360432	0.382069	0.42449	-0.00403447	0.563972	-0.613467	-0.306165	0.650109	0.259017	0.0268866	-0.473308	0.455404	-0.287549	0.461756
Q24JW4	Q24JW4	flj13639	56	21	62.8	343.13	DANRE	35790.6	Flj13639	NA	0.53866	0.0231993	0.0739348	0.858668	0.00224876	0.0293402	0.252699	0.283532	0.679808	-0.0673086	0.752613	0.835783	-0.0801477	-0.169278	-0.670356	-0.343735	-0.157314	-0.789764	0.574172	0.326249	-0.642844	-0.213855	0.521813	0.254732	-0.614193	-0.17094	-0.742095
B0UYL5	B0UYL5	dhrs12	7	6	21.6	94.61	DANRE	35822.9	Dehydrogenase/reductase (SDR family) member 12	NA	-0.673775	0.0168813	0.0596386	0.0425981	0.874845	0.94488	0.18321	0.501833	0.833716	-0.533162	0.0492192	0.139152	-0.130675	-0.00333308	-0.0784099	-0.135594	0.0822151	0.0341744	-0.00587929	-0.3504	0.047109	-0.0206339	-0.0443924	-0.125981	1.02978	-0.210536	1.13129
X1WFH2	X1WFH2	si:ch211-165b10.3	4	4	18	94.5	DANRE	39898.1	Si:ch211-165b10.3	NA	0.763234	0.000322399	0.00504029	0.928342	0.000111843	0.00482448	0.579763	0.00464352	0.0836625	0.414655	0.0204903	0.0768355	-0.114359	-0.273052	-0.305554	-0.459935	0.524213	-0.510706	0.597068	-0.00998184	-0.577744	-0.705283	0.532471	0.317941	-1.0288	-0.148957	-0.972971
A6NA21	A6NA21|A3KP36	cavin1b	55	19	40.5	342.67	DANRE	51773.3	Caveolae-associated protein 1b	SUBCELLULAR LOCATION: Membrane, caveola {ECO:0000256|ARBA:ARBA00004345}.	0.265068	0.0184101	0.0634362	-0.090974	0.406774	0.652836	0.551451	0.000179793	0.0165651	0.907494	5.0178e-07	9.00957e-05	0.599142	-0.00811201	0.68425	-0.287096	0.446736	0.581679	0.572913	-0.207016	0.370918	-0.44152	0.384421	0.0488749	-0.440467	-0.167459	-0.224902
E7F0K3	E7F0K3	cavin1a	43	19	41.4	311.34	DANRE	46723.7	Caveolae-associated protein 1a	SUBCELLULAR LOCATION: Membrane, caveola {ECO:0000256|ARBA:ARBA00004345}.	1.14456	8.05761e-05	0.00227587	0.70132	0.00683101	0.0570691	-0.260638	0.253226	0.656191	0.182605	0.381993	0.538271	0.139601	0.550127	-0.149327	-0.421111	0.171674	-0.721462	0.579388	0.556257	-0.751388	-0.807843	0.240963	0.879518	-0.657808	0.37935	-0.326234
Q9PTH5	Q9PTH5|A0A2R8QIT4	psme1	65	21	76.2	342.45	DANRE	28497.3	Proteasome activator subunit 1	NA	0.265521	0.0318698	0.0922915	0.548452	0.000512752	0.0117715	0.146069	0.242119	0.645447	-0.136862	0.236798	0.391536	-0.0895072	0.177491	-0.157348	-0.261523	0.199037	-0.253857	0.439892	0.1451	-0.417868	-0.172961	0.317493	0.0207957	-0.0299082	0.347565	0.0932612
A4VAK4	A4VAK4|K7DYC3	hspb1	69	21	66.3	341	DANRE	22522.3	Heat shock 27 kDa protein	SUBCELLULAR LOCATION: Cytoplasm, cytoskeleton, spindle {ECO:0000256|ARBA:ARBA00004186}.	2.09843	1.26212e-05	0.000825189	0.822641	0.0274938	0.134833	0.0349254	0.917548	0.982431	1.31071	0.000926154	0.00944171	-0.285427	0.434279	-0.246217	-1.47366	-0.15068	0.440823	1.07502	0.572006	-0.718078	-1.75449	0.93691	1.15789	-1.65789	0.177791	-1.1657
A0A2R8Q7V9	A0A2R8Q7V9|F1QGJ3	A0A2R8Q7V9	37	21	70.1	340.86	DANRE	46923.6	Perilipin	NA	-0.135822	0.337001	0.471906	-0.394079	0.0191258	0.109357	-0.0287171	0.848256	0.963229	0.229539	0.116038	0.244798	0.272015	0.423055	0.459387	0.0478956	-0.259527	0.305146	0.112604	-0.155231	0.463065	0.256574	0.0893969	-0.14967	0.0661494	-0.0799868	0.210838
Q6IMW7	Q6IMW7	pvalb4	552	20	94.4	340.59	DANRE	11637.9	Parvalbumin 4	NA	0.973776	0.000395145	0.00563148	0.263473	0.255666	0.506779	0.405177	0.0906297	0.410299	1.11548	0.000119014	0.00241109	0.440367	-0.141779	0.356867	-0.682984	0.579788	0.383419	0.314527	0.715646	0.192016	-1.08471	0.925606	-0.0977786	-0.927274	0.329765	-0.394283
A0A0R4ITN2	A0A0R4ITN2|F1QM90	gc	36	22	46	340.36	DANRE	53571	Gc-globulin	SUBCELLULAR LOCATION: Secreted {ECO:0000256|ARBA:ARBA00004613}.	0.481013	0.0439488	0.114137	-0.122327	0.607844	0.804999	0.0286927	0.903715	0.979887	0.632033	0.0117446	0.0522318	0.593707	0.15292	0.954493	-0.429701	0.276339	-0.367024	0.127462	0.096205	0.254063	-0.267871	0.305647	0.463031	-0.159525	0.119004	-0.235794
A0A0R4J8E6	A0A0R4J8E6|A0A286YA65	prpf8	38	33	14.4	340.25	DANRE	275682	Pre-mRNA-processing factor 8	NA	-0.126215	0.191598	0.314715	-0.0453574	0.654136	0.835509	0.177109	0.0969271	0.421613	0.0962515	0.312517	0.470147	0.357371	-0.106333	0.234781	0.166081	0.131623	0.00648657	0.0399425	-0.0118388	0.120408	0.0926648	0.231648	-0.115937	0.00750948	0.0632885	0.0677855
F1Q8D2	F1Q8D2	nsfl1c	45	22	56.7	340.08	DANRE	40761.4	NSFL1 cofactor p47	SUBCELLULAR LOCATION: Golgi apparatus, Golgi stack {ECO:0000256|ARBA:ARBA00004348}.	0.323572	0.0232694	0.0740304	0.0830332	0.551293	0.76689	0.168193	0.237383	0.638458	0.408731	0.00639671	0.034316	0.172264	-0.0228568	0.209901	-0.298889	0.0201103	0.19826	0.263392	0.242035	0.10912	-0.43263	0.482756	0.115717	-0.305899	0.0140109	0.0920384
Q6DG42	Q6DG42|A0A0R4IRH8	Q6DG42	32	8	43.1	340.07	DANRE	57591.8	Non-specific serine/threonine protein kinase	NA	0.154089	0.276004	0.409551	-0.0505871	0.735064	0.879441	-0.0364098	0.807362	0.952461	0.168266	0.23629	0.391205	0.287405	0.291612	0.281078	-0.232073	0.00630001	-0.0159469	0.264367	0.152928	0.282263	-0.171229	0.203671	0.163328	0.174587	0.170221	0.39045
A5WVS2	A5WVS2|A5WVS3	pak2b	2	2	26.8	237.46	DANRE	59855.9	Non-specific serine/threonine protein kinase	SUBCELLULAR LOCATION: Cytoplasm {ECO:0000256|ARBA:ARBA00004496}.	0.164893	0.226926	0.356053	-0.265769	0.0810303	0.264171	-0.178658	0.225567	0.623687	0.252003	0.0747486	0.183713	0.466282	0.295402	0.353732	-0.098142	-0.176884	0.272273	0.172385	0.33602	0.172159	-0.19232	0.155528	0.150832	0.23079	0.13375	0.316105
A0A0R4IC19	A0A0R4IC19|A0A0R4IH73	A0A0R4IC19	3	3	15.5	134.04	DANRE	64566.6	Non-specific serine/threonine protein kinase	NA	-0.220776	0.00988497	0.0416272	0.0140894	0.860904	0.937888	-0.166485	0.0548651	0.316898	-0.40135	0.000107687	0.00223231	-0.127796	0.0753065	-0.0613012	0.369402	-0.0115464	0.00260695	-0.118971	0.113548	-0.121248	0.424237	-0.0580179	0.106357	0.284945	0.119347	0.219078
B8A4V2	B8A4V2|Q7T391	anxa11a	40	21	40.3	339.73	DANRE	56032.1	Annexin	NA	0.30579	0.0555664	0.134917	-0.0803582	0.61718	0.810549	0.0750715	0.640311	0.895053	0.46122	0.00742252	0.037926	0.595234	0.218489	0.492127	-0.307001	0.117558	0.143921	0.481674	0.232671	0.230725	-0.297689	0.2562	0.259649	-0.0659806	0.12948	0.287799
A0A2R8Q3D1	A0A2R8Q3D1	A0A2R8Q3D1	35	26	35.9	339.29	DANRE	99814.8	Uncharacterized protein	NA	0.22487	0.0759008	0.167372	0.138779	0.290152	0.544981	-0.119933	0.357955	0.738565	-0.0338417	0.775988	0.851599	0.134466	0.132491	-0.0161344	0.222075	-0.0519766	0.0963898	0.118114	0.275154	-0.161388	0.0515382	0.3902	0.44935	-0.0115387	0.231186	-0.0733748
F1QR17	F1QR17	aldh7a1	52	20	45.2	338.9	DANRE	59656.4	Aldehyde dehydrogenase 7 family, member A1	NA	0.397475	0.00849392	0.0377531	0.265343	0.077517	0.257483	-0.148551	0.30244	0.699008	-0.0164186	0.899927	0.938704	0.214816	0.279585	-0.0502351	-0.197715	0.122904	-0.290615	0.102197	0.414804	-0.151476	-0.253026	0.362795	0.312113	0.0304647	0.371563	0.20844
E7F049	E7F049|F1R9S8|F1QJA1	ktn1	35	25	21.1	338.68	DANRE	142472	Kinectin 1	NA	-0.138259	0.0942238	0.194141	-0.116568	0.182114	0.418097	-0.011137	0.894869	0.97704	-0.0328287	0.674928	0.782112	0.131076	0.0398397	0.128102	0.18835	0.0934884	0.0659821	0.0219157	-0.0287988	0.08825	0.186408	-0.155049	-0.0689547	0.0991112	0.0496017	0.0708558
F1Q8J9	F1Q8J9|F6N9I0	pkp3a	39	22	26	337.71	DANRE	95939.2	Plakophilin 3a	NA	0.422772	0.0363855	0.101298	-0.10624	0.596034	0.796848	0.576298	0.0114528	0.137044	1.10531	3.97729e-05	0.00120095	0.896937	-0.231115	0.833982	-0.603912	0.307903	-0.144408	0.426504	-0.148071	0.509696	-0.616518	0.519028	-0.039693	-0.636237	-0.215065	-0.468364
F1QWE6	F1QWE6|A0A286YB85	pkp3b	22	18	23.2	253.65	DANRE	87435.6	Plakophilin 3b	NA	0.0915504	0.40921	0.541232	-0.00486515	0.967163	0.985591	-0.14721	0.226613	0.623687	-0.0507942	0.643903	0.760475	0.077387	0.167938	0.21579	0.0589272	0.110024	-0.0804977	0.146298	0.107905	0.111215	-0.0168205	-0.0279964	0.460022	0.170036	0.157408	0.314928
Q6ZM34	Q6ZM34|A0A1L1QZM6	vps35	34	23	29.6	336.82	DANRE	96249	Vacuolar protein sorting-associated protein 35	NA	0.236221	0.0298528	0.0879467	0.00391907	0.970646	0.987224	0.0694581	0.517821	0.844221	0.301761	0.00824606	0.0407865	0.202033	0.202538	0.216304	-0.219006	0.0871482	-0.0712523	0.241292	-0.0255524	0.241683	-0.200649	0.124893	0.130877	-0.208014	0.0187483	0.00939403
Q5RH29	Q5RH29|Q5RH28	itih2	40	21	25.3	336.62	DANRE	106689	Inter-alpha-trypsin inhibitor heavy chain 2	SUBCELLULAR LOCATION: Secreted {ECO:0000256|ARBA:ARBA00004613}.	0.219151	0.168988	0.290204	0.558926	0.00446313	0.0434727	0.135113	0.420606	0.785478	-0.204663	0.196862	0.349138	-0.0554512	0.336226	0.106294	0.0243289	0.229894	-0.499217	0.699023	0.0383582	-0.302129	-0.107567	0.184984	0.407387	0.112508	0.162779	0.0388764
F1RCW3	F1RCW3|I3ISF1	faah	29	19	43.8	336.24	DANRE	66122	Fatty acid amide hydrolase	NA	0.470209	0.473447	0.600761	0.413674	0.557924	0.771282	-0.423406	0.548829	0.857576	-0.366871	0.574397	0.705726	-0.868995	-1.14925	-0.96737	0.315322	0.364343	0.258923	-1.67336	1.58261	-1.09195	0.234833	0.547986	-0.58258	-0.798455	0.828143	-0.953615
A8WIP5	A8WIP5	hcfc1b	33	13	12.9	336.22	DANRE	205719	Host cell factor C1b	SUBCELLULAR LOCATION: Nucleus {ECO:0000256|ARBA:ARBA00004123}.	-0.203793	0.0291566	0.086772	-0.0180865	0.843268	0.930265	-0.0250284	0.784543	0.946232	-0.210735	0.0249226	0.0870447	-0.0697654	0.0936127	0.0580726	0.274176	0.012916	0.172341	0.0630105	0.00947185	0.106423	0.135877	0.0701168	0.0176045	0.373149	0.174149	0.326807
F1Q750	F1Q750|A0A2R8Q6N1	hcfc1a	15	13	14	305.71	DANRE	186585	Host cell factor C1a	SUBCELLULAR LOCATION: Nucleus {ECO:0000256|ARBA:ARBA00004123}.	0.0518252	0.539034	0.660335	0.0761397	0.406399	0.652399	-0.0266255	0.768833	0.941937	-0.05094	0.545886	0.681123	0.0188784	0.25886	0.117846	0.0463687	0.0209418	-0.0442672	0.147769	0.103412	0.150077	0.059546	0.241609	0.151355	0.129719	0.139969	0.210662
A0A0R4IPH8	A0A0R4IPH8|Q7T2C8	txnrd3	31	20	44.3	335.77	DANRE	67096.5	Thioredoxin-disulfide reductase	NA	-0.218999	0.127952	0.24008	-0.0683674	0.64597	0.831	0.0827228	0.579074	0.869682	-0.0679088	0.622343	0.744251	0.00843647	-0.0273076	0.164151	-0.000425824	0.0670823	0.0701894	0.0948364	-0.0323033	0.266609	-0.162399	0.0150191	-0.0569859	0.416824	0.0216228	0.527022
F1QFL1	F1QFL1|F1QVW1	mars1	36	26	24.9	335.58	DANRE	108353	Methionine--tRNA ligase, cytoplasmic	NA	-0.606703	0.293861	0.428867	-0.191739	0.753933	0.888797	0.320666	0.601404	0.879434	-0.0942979	0.867568	0.917946	-0.875039	-0.750928	-0.805702	0.558917	0.581777	1.79082	-0.78742	-0.797195	-0.691061	0.401559	-0.805307	-0.796844	-0.293938	-0.285632	-0.870325
F1R9B8	F1R9B8	si:ch211-241e1.3	37	30	19.8	334.94	DANRE	152622	Si:ch211-241e1.3 (Fragment)	NA	0.0252965	0.772345	0.843066	-0.472005	0.000211831	0.00692867	-0.0193713	0.837352	0.95961	0.47793	9.38564e-05	0.00205222	0.485217	0.0100994	0.665146	-0.0491685	0.0522091	0.403611	0.00305381	5.31496e-05	0.401949	0.135494	-0.0043352	0.167613	-0.0448753	-0.0323768	0.00275333
F1QGW6	F1QGW6|E9QBU9	eif2s3	37	13	52.5	334.73	DANRE	51791.1	Eukaryotic translation initiation factor 2 subunit 3	NA	0.200639	0.0113223	0.0455334	-0.0204336	0.784991	0.905259	-0.225804	0.00893454	0.122558	-0.00473154	0.945522	0.967337	0.0260143	0.248529	0.0152286	-0.018111	-0.0176444	0.0533667	0.0829788	0.309931	0.0505064	0.074194	-0.0177982	0.19852	0.0994617	0.209619	0.00849741
F1QUS0	F1QUS0	calb2b	44	17	68.7	334.56	DANRE	31072.6	Calretinin	NA	0.553544	0.0168201	0.0594943	0.040486	0.855341	0.935919	-0.525236	0.0315518	0.236247	-0.0121785	0.952738	0.97221	0.42443	0.446839	-0.352668	0.0254644	0.389771	-0.539207	-0.31954	0.566566	0.114409	-0.114315	-0.21355	0.570597	-0.212349	0.32585	-0.00312247
Q6PC44	Q6PC44	calb2a	8	3	46.8	189.12	DANRE	31238.8	Calretinin	NA	0.320531	0.0187852	0.0642086	0.246085	0.0786093	0.259235	0.346982	0.0185738	0.181889	0.421428	0.00373719	0.0239369	0.108724	-0.0580552	0.0996723	-0.0480764	0.625885	0.416007	0.338533	0.206981	0.152643	-0.208087	0.356623	0.280394	-0.381822	-0.0558596	-0.27068
E7EYA8	E7EYA8	fubp3	38	23	41.3	334.08	DANRE	62464.3	Far upstream element (FUSE)-binding protein 3	SUBCELLULAR LOCATION: Nucleus {ECO:0000256|ARBA:ARBA00004123}.	-0.0525913	0.669158	0.766444	0.126044	0.349831	0.599535	0.0133036	0.920009	0.98276	-0.165331	0.192764	0.344509	-0.0428987	0.031294	-0.0766919	-0.170036	0.0411538	-0.0259964	0.0712299	0.0294527	-0.137919	-0.144792	0.0531176	0.0843372	0.267417	0.0223702	0.425231
Q7SYD0	Q7SYD0	cbr1	39	18	77.5	329.3	DANRE	30346	Carbonyl reductase 1	NA	-0.064377	0.752226	0.828356	-0.537342	0.0271988	0.134156	-0.325654	0.155143	0.525597	0.147312	0.473748	0.623443	0.756036	0.0655829	0.0134188	-0.0624501	-0.340499	0.130334	-0.0903425	-0.357996	0.271587	0.0182223	-0.302654	0.451143	0.555831	0.165892	0.070526
A8KC02	A8KC02	cbr1l	39	16	79.4	333.94	DANRE	30435.3	Carbonyl reductase 1-like	NA	-0.0188117	0.947831	0.964732	0.329575	0.299087	0.555673	0.432887	0.179054	0.562715	0.0845003	0.769199	0.846934	0.0543534	0.0405422	0.398111	-0.436235	0.0720763	-0.399203	0.935825	0.0309053	0.464735	-0.435454	0.369321	0.0619587	0.244929	-0.0286577	0.806756
Q6DI22	Q6DI22	hadh	69	18	58.8	333.54	DANRE	33449.9	Hydroxyacyl-CoA dehydrogenase	NA	0.5531	0.00957728	0.0407645	0.854818	0.000809402	0.0150954	0.413775	0.0553956	0.319075	0.112057	0.548427	0.683217	-0.0672223	0.0990652	0.0134854	-0.121252	0.707621	-0.276341	0.29234	0.366418	-0.734529	-0.488797	0.766038	0.0336201	-0.706418	0.200462	-0.196368
F1RD80	F1RD80	cdh17	32	21	30.9	333.13	DANRE	97154.9	Cadherin 17, LI cadherin (liver-intestine)	NA	0.0310414	0.935394	0.957435	-0.696878	0.109822	0.315018	-2.10831	0.000180225	0.0165651	-1.38039	0.00286089	0.019979	-1.5267	-0.10967	-1.18789	0.58343	-0.852734	-0.929295	-2.39106	0.246268	-1.09797	0.887519	-2.40322	0.794906	-0.242252	-0.0276192	-0.448978
Q5SPD1	Q5SPD1|Q5SPD0|Q5SPC9|U3JAB2|U3JAV1	eef1db	13	9	54	267.2	DANRE	30497.5	Elongation factor-1, delta, b	NA	-0.0929758	0.554907	0.673535	-0.0492168	0.771124	0.898676	0.0842004	0.619852	0.888585	0.0404413	0.796189	0.865085	0.202319	-0.0164604	0.269818	-0.0409901	-0.0839278	-0.176702	0.113687	0.0768073	0.451825	-0.0485337	0.383035	0.0738188	0.202303	0.0794252	0.472715
Q6IQE2	Q6IQE2	eef1b2	34	12	59.5	254.33	DANRE	24704.4	Elongation factor 1-beta	NA	1.2014	0.00166749	0.0135406	0.341229	0.316647	0.571226	-0.42013	0.222213	0.620007	0.440044	0.170688	0.317297	0.305206	0.549567	0.143108	-0.884087	-0.25993	-0.974898	0.57341	0.81148	0.0360287	-1.03409	0.342291	0.742388	-0.450266	0.451445	0.117718
A0A0R4IPX4	A0A0R4IPX4	eef1da	3	3	25.8	79.14	DANRE	26731.7	Eukaryotic translation elongation factor 1 delta a (guanine nucleotide exchange protein) (Fragment)	NA	2.44309	0.00294667	0.0190498	1.82742	0.0251227	0.128705	0.097744	0.894253	0.97704	0.713412	0.304834	0.461656	-0.337378	-0.50931	-0.929715	-2.16297	-0.881074	-2.36309	1.40559	0.941792	-1.36767	-2.34274	1.20935	2.19191	-1.53639	-0.703545	-1.80941
Q503E2	Q503E2	prep	30	19	36.2	331.24	DANRE	81305.2	Post-proline cleaving enzyme	NA	0.119686	0.385037	0.51845	-0.259315	0.0947724	0.286168	-0.206486	0.174816	0.555175	0.172515	0.217712	0.372107	0.312772	0.377217	0.268126	0.00211827	-0.0493779	0.155439	0.0336476	-0.209109	0.235378	-0.142247	-0.0334273	0.374931	0.101002	0.217359	0.320783
Q8AWD0	Q8AWD0	vdac2	90	16	65.7	330.89	DANRE	30340.5	Voltage-dependent anion-selective channel protein 2	SUBCELLULAR LOCATION: Mitochondrion outer membrane {ECO:0000256|ARBA:ARBA00004294}.	0.902206	0.000703519	0.00782245	0.854376	0.00193302	0.0267626	-0.672159	0.00933835	0.125209	-0.624328	0.00916209	0.0438798	-0.299333	0.456771	-0.820424	0.222146	0.0376406	-0.962118	0.0187179	0.759856	-1.33868	-0.206582	-0.0586485	0.620251	-0.48345	0.848704	-0.455359
Q7ZV39	Q7ZV39	Q7ZV39	33	14	70.4	271.69	DANRE	30101.3	Voltage-dependent anion-selective channel protein 3	SUBCELLULAR LOCATION: Mitochondrion outer membrane {ECO:0000256|ARBA:ARBA00004294}.	1.11824	0.000265972	0.00446242	0.625601	0.0232378	0.123306	-0.604826	0.0272933	0.221915	-0.112184	0.626223	0.747249	0.201861	0.406724	-0.551087	-0.0803548	-0.0343952	-0.784258	0.141779	0.811737	-1.01462	-0.636388	0.158338	0.832326	-0.65543	0.722814	-0.327201
A0A2R8PXE0	A0A2R8PXE0|A8E5C1	serpina7	73	7	50.7	330.88	DANRE	47276	Serpin peptidase inhibitor, clade A (alpha-1 antiproteinase, antitrypsin), member 7	NA	0.195282	0.583776	0.698681	0.97682	0.0221036	0.119897	0.89134	0.0338751	0.2456	0.109802	0.757068	0.838381	-0.625772	-0.552089	-0.219232	-0.30547	0.648583	0.758525	0.259217	0.221027	-1.2155	-0.232255	1.04617	-0.614801	-0.649863	-0.0142012	-0.553603
A8KBW0	A8KBW0	A8KBW0	13	5	41.3	260.45	DANRE	42868.7	Zgc:174260	NA	0.222127	0.22116	0.349769	0.362205	0.0745077	0.252649	0.691516	0.0026991	0.0611345	0.551438	0.00718367	0.0370942	0.138668	0.0273328	0.645093	-0.627821	0.526471	0.315788	0.722081	-0.391323	-0.235324	-0.301402	0.486233	-0.0270272	-0.2673	-0.0619986	-0.145002
A0A2R8PZC2	A0A2R8PZC2|E7FF11	LOC110439158	5	5	26.6	190.22	DANRE	47469.3	SERPIN domain-containing protein	NA	-0.334326	0.180437	0.303618	-0.0982864	0.706128	0.864046	0.544965	0.0523962	0.308826	0.308926	0.213517	0.368044	0.107098	0.162708	0.79165	-0.290142	-0.112758	0.437499	0.720828	-0.796092	0.0806085	0.0343358	0.159712	-0.231468	0.219649	-0.291298	0.21731
A0A286Y8E9	A0A286Y8E9|Q6P1S3|A3KQQ1	xpnpep1	36	22	38.5	330.74	DANRE	70720.2	X-prolyl aminopeptidase (aminopeptidase P) 1, soluble	NA	-0.391349	0.00329171	0.020385	-0.264184	0.0425941	0.178277	-0.101726	0.401959	0.773841	-0.228891	0.0554383	0.150421	-0.0221883	-0.0636841	-0.0409263	0.333409	-0.0891145	0.461972	-0.120191	0.0447907	0.109691	0.348754	-0.201834	-0.144919	0.283392	0.0225282	0.458558
A0A0R4IJ61	A0A0R4IJ61|Q6AZB2|F1REG7|B0S6X0	oxct1a	62	18	47.4	330.61	DANRE	61891.3	Succinyl-CoA:3-ketoacid-coenzyme A transferase	NA	0.62383	0.000981087	0.00964455	0.757982	0.000375223	0.00944163	0.0389002	0.810127	0.953036	-0.095252	0.527982	0.667296	-0.13951	0.22221	-0.26528	-0.197828	0.141873	-0.482651	0.692959	0.34893	-0.699296	-0.511956	0.24906	0.483901	-0.255259	0.234548	-0.240688
A8KBV1	A8KBV1	oxct1b	10	8	27.7	158.69	DANRE	58187.7	Succinyl-CoA:3-ketoacid-coenzyme A transferase	NA	-1.85402	0.00125307	0.0112883	-0.0986759	0.842455	0.929854	0.327524	0.512769	0.840599	-1.42782	0.00750462	0.0382223	-0.833686	-1.484	-0.595241	1.52299	-1.03802	-0.738086	-1.15736	-0.847531	-1.51163	1.18983	-0.859634	-1.7258	0.43937	-1.32611	-1.11957
Q7T2J4	Q7T2J4	adh8b	48	17	57.1	311.16	DANRE	41736.7	Alcohol dehydrogenase 8b	NA	-0.524002	0.0562321	0.136116	-0.0318502	0.907808	0.961484	-0.0862998	0.754096	0.936939	-0.578452	0.0377282	0.115684	-0.219045	-0.304432	-0.0966874	0.443952	-0.203435	-0.217201	-0.119776	-0.367144	-0.712774	0.878579	-0.706621	-0.0199424	0.249179	-0.33639	-0.50361
Q6P0S5	Q6P0S5	adh8a	65	16	59.6	330.6	DANRE	41370.2	Alcohol dehydrogenase 8a	NA	0.256663	0.261487	0.393835	0.138273	0.568113	0.780079	0.0310673	0.897311	0.97704	0.149457	0.506133	0.650068	0.233242	0.183005	0.362884	-0.160528	-0.108772	-0.518955	0.554385	-0.0656701	-0.146387	0.0653646	-0.0827048	0.463551	-0.187058	-0.221278	-0.384823
F8W5L3	F8W5L3|F1QV62	oat	33	21	55.4	330.42	DANRE	49164.4	Ornithine--oxo-acid aminotransferase	NA	0.57597	0.0515085	0.128054	0.15035	0.612635	0.808475	-0.0800205	0.786796	0.946842	0.3456	0.220369	0.374727	0.456537	0.43866	0.155561	-0.540701	-0.0834026	-0.443077	0.468895	0.429725	0.423842	-0.803509	0.510205	0.410343	0.127695	0.235618	0.426979
A2BEN1	A2BEN1	atp6v1aa	36	2	41.6	330.21	DANRE	68719.2	H(+)-transporting two-sector ATPase	NA	-0.093241	0.603152	0.714098	-0.0101616	0.957941	0.982984	0.0251874	0.896025	0.97704	-0.057892	0.746042	0.830814	0.0603988	0.41847	0.099691	-0.175192	0.0239816	0.143115	0.243343	-0.0741238	0.203704	-0.126523	0.0823725	0.0493654	0.360167	-0.028198	0.680025
E7FCD8	E7FCD8	atp6v1ab	4	3	41.1	327.64	DANRE	68662.2	H(+)-transporting two-sector ATPase	NA	-0.00766864	0.971787	0.9806	-0.143346	0.543497	0.75941	-0.0708848	0.762562	0.94034	0.0647928	0.765479	0.844304	0.162439	0.601404	0.251747	-0.154674	0.0436353	0.294376	0.264078	0.0729026	0.478518	-0.207475	0.152559	0.233382	0.441623	-0.0104537	0.848436
A0A286Y8C1	A0A286Y8C1|F1R6C8|A0A0R4IIJ7|A2BGY1	ctnnd1	32	23	31.2	329.28	DANRE	103773	Catenin (cadherin-associated protein), delta 1	NA	0.100805	0.3334	0.468207	-0.0753235	0.49922	0.724383	-0.0874158	0.434368	0.795469	0.0887124	0.392652	0.547812	0.263194	0.26273	0.254718	-0.0647055	0.0507667	-0.115098	0.123635	0.153206	0.138861	-0.0273995	0.00588475	0.0464409	0.0919865	0.127668	0.186944
F1R972	F1R972|A1L260	cavin4a	67	20	53.2	328.89	DANRE	40571.1	Muscle-restricted coiled-coil protein (Fragment)	SUBCELLULAR LOCATION: Cytoplasm, myofibril, sarcomere {ECO:0000256|ARBA:ARBA00004204}. Membrane, caveola {ECO:0000256|ARBA:ARBA00004345}.	1.20515	5.72287e-05	0.00193542	0.861463	0.00189936	0.0264119	-0.0316442	0.888501	0.973909	0.312042	0.151991	0.293387	0.201728	0.396212	-0.258967	-0.768357	0.217027	-0.685981	0.848117	0.644412	-0.628506	-0.951077	0.490451	0.698197	-0.574974	0.461883	-0.325484
B8A5M6	B8A5M6|A0A2R8Q5I0	pdia2	36	19	41.6	328.77	DANRE	63681.8	Protein disulfide-isomerase	SUBCELLULAR LOCATION: Endoplasmic reticulum lumen {ECO:0000256|ARBA:ARBA00004319}.	-1.7169	0.0043096	0.0240919	0.0812739	0.881818	0.948677	0.516384	0.353096	0.737036	-1.28179	0.0229289	0.0820962	-1.53486	-1.56273	-1.42676	0.522246	0.385975	0.537668	-1.5107	-1.42823	-0.217403	0.841988	-0.612473	-1.28283	0.457135	-0.108002	0.664452
A7MCR1	A7MCR1	uqcrfs1	56	21	65.2	328.18	DANRE	29998.6	Cytochrome b-c1 complex subunit Rieske, mitochondrial	SUBCELLULAR LOCATION: Membrane {ECO:0000256|ARBA:ARBA00004167}; Single-pass membrane protein {ECO:0000256|ARBA:ARBA00004167}. Mitochondrion inner membrane {ECO:0000256|RuleBase:RU004495}.	0.98134	0.00133954	0.0118013	0.917837	0.00375242	0.0396138	0.545063	0.0563079	0.321426	0.608565	0.0253411	0.0881229	0.378083	-0.0192815	-0.136297	-0.409091	0.475671	-0.675259	0.546726	0.398756	-0.276738	-0.740385	1.19846	0.360106	-1.25286	0.0413091	-0.742134
A0A2R8Q4D3	A0A2R8Q4D3|A0A2R8Q7E9|F1R7X5	SUCLG2	36	23	60.3	328.08	DANRE	47115.5	Succinate--CoA ligase [GDP-forming] subunit beta, mitochondrial	SUBCELLULAR LOCATION: Mitochondrion {ECO:0000256|HAMAP-Rule:MF_03221}.	-0.0854917	0.571242	0.688356	0.410039	0.0230612	0.122574	-0.0132254	0.934955	0.985128	-0.508756	0.00432813	0.0262968	-0.196702	-0.124084	-0.375366	0.323016	-0.0347471	-0.593523	-0.0620402	0.122516	-0.395185	0.229411	0.156323	0.251475	0.231484	-0.117626	-0.309663
Q5RHQ7	Q5RHQ7	hnrnpub	31	21	30.5	328.08	DANRE	89176.1	Heterogeneous nuclear ribonucleoprotein Ub	NA	0.000463037	0.99597	0.996284	0.198493	0.0620807	0.22546	0.0067774	0.945437	0.987269	-0.191252	0.0534228	0.146837	-0.0124617	0.0952638	0.030272	0.121148	-0.0743303	-0.174057	0.120808	0.11951	-0.174699	0.0653834	0.300792	0.0980194	0.0718492	0.123123	0.175684
E7F3J2	E7F3J2	hnrnpua	10	8	13.9	87.7	DANRE	85814.6	Heterogeneous nuclear ribonucleoprotein Ua	NA	0.0275082	0.87722	0.917587	0.0934683	0.628424	0.818757	0.271067	0.174446	0.555175	0.205107	0.261306	0.417487	-0.184773	-0.334635	-0.0871335	-0.0115477	0.297134	0.596385	-0.00642666	-0.123433	-0.306524	-0.0910802	0.003164	-0.0588019	-0.320726	-0.175568	-0.379118
Q8JH68	Q8JH68|B8JKI3	mxa	33	10	39.9	328	DANRE	73774.5	Interferon-induced GTP-binding protein MxA	SUBCELLULAR LOCATION: Cytoplasm {ECO:0000250}.	-0.392392	0.250588	0.381659	0.487931	0.189579	0.427497	1.22038	0.00427157	0.0798037	0.340062	0.316268	0.473177	-0.0567731	-0.615667	0.106477	-0.181757	0.362312	0.500061	-0.392927	-0.707592	-0.254454	-0.225286	1.71589	-0.659327	-0.422295	-0.651917	-0.235599
B8JKI4	B8JKI4|Q800G8|X1WFC1	mxb	8	7	36.8	268.27	DANRE	71698.8	Interferon-induced GTP-binding protein MxB	NA	-0.709765	0.07419	0.164979	0.819274	0.0584494	0.218659	1.81257	0.000520614	0.0251456	0.283528	0.451507	0.60368	-0.562629	-1.27845	-0.181704	-0.604511	0.100889	0.0602721	-0.277971	-1.23489	-0.154715	-0.408768	2.00582	-1.33185	-0.370696	-0.966767	-0.588913
Q64HD0	Q64HD0	shbg	43	19	47.5	327.98	DANRE	42527	Sex hormone-binding globulin	NA	0.205801	0.0965659	0.197746	0.312536	0.0257771	0.130538	0.433437	0.00402293	0.0761596	0.326702	0.0139169	0.0584416	0.104593	-0.0881644	0.334792	-0.129854	0.495906	0.395045	0.538599	0.350096	-0.0331922	-0.173685	0.504032	-0.0314886	-0.154518	0.0871929	-0.0475125
Q6VN46	Q6VN46|H0WE38	mb	64	19	95.9	326.88	DANRE	15639.8	Myoglobin	NA	-0.444835	0.460657	0.58996	-0.053536	0.93377	0.973694	1.75318	0.0159417	0.16493	1.36188	0.0369261	0.113996	0.6076	-1.89916	0.122919	0.441586	1.27731	1.05082	-0.520421	-0.575345	0.173037	0.0995674	0.548285	-1.66568	-1.76208	-1.13232	-2.27223
A0A0G2KI51	A0A0G2KI51	lama2	34	22	31.9	326.52	DANRE	97128.7	Laminin, alpha 2	SUBCELLULAR LOCATION: Membrane {ECO:0000256|ARBA:ARBA00004370}. Secreted, extracellular space, extracellular matrix, basement membrane {ECO:0000256|ARBA:ARBA00004302}.	0.246258	0.179621	0.302956	0.212357	0.277852	0.531801	0.0594077	0.756314	0.937924	0.0933093	0.599883	0.725374	0.0535522	-0.109554	-0.21172	0.0925908	0.0336424	0.228583	0.0525177	0.0289447	-0.585932	-0.033606	0.164272	0.125936	-0.473334	0.0509519	-0.474406
Q7ZUV5	Q7ZUV5|A0A2R8RUB5|F1RBB0|A0A0R4IQQ8|Q7T3A4|A8WHV3|Q6DGH8|Q6DI36|A8WHV0|E9QDA3|A0A0G2L3I9|A5PLA1|A1A5H9|Q6P977|Q0P3V5|Q6DGB3	rab1ba	50	4	92	326.44	DANRE	22612.2	ZRAB1B, member RAS oncogene family a	NA	-0.0635111	0.528661	0.650547	-0.0189073	0.861123	0.937888	0.0830653	0.447186	0.805081	0.0384615	0.70136	0.801464	0.0866617	0.0215474	-0.0178045	-0.161003	0.0706062	-0.0267836	0.162971	-0.20942	0.120708	0.0360956	-0.168213	-0.00457532	-0.00207985	-0.0526606	0.135923
B8JLC8	B8JLC8	rab1aa	6	4	75.1	245.74	DANRE	22542.2	RAB1A, member RAS oncogene family a	NA	-0.35008	0.00709619	0.0338122	0.0847815	0.486052	0.715758	-0.248476	0.0558925	0.320497	-0.683337	3.20633e-05	0.00107573	-0.466452	-0.0882693	-0.333427	0.297372	-0.121299	-0.318267	-0.358867	-0.169271	-0.558888	0.445632	-0.523266	-0.151961	0.175049	0.0654964	0.138261
Q7ZVX4	Q7ZVX4|F1QBP2	rab14	16	12	54.4	179.39	DANRE	24102.7	Ras-related protein Rab-14	SUBCELLULAR LOCATION: Cytoplasmic vesicle, phagosome {ECO:0000256|ARBA:ARBA00004262}. Early endosome membrane {ECO:0000256|ARBA:ARBA00004438}; Lipid-anchor {ECO:0000256|ARBA:ARBA00004438}; Cytoplasmic side {ECO:0000256|ARBA:ARBA00004438}. Endosome membrane {ECO:0000256|ARBA:ARBA00004238}; Lipid-anchor {ECO:0000256|ARBA:ARBA00004238}; Cytoplasmic side {ECO:0000256|ARBA:ARBA00004238}. Golgi apparat…	0.0972975	0.314509	0.449939	0.0611455	0.553109	0.767579	-0.12662	0.229685	0.627601	-0.090468	0.348381	0.505974	0.0074414	0.227002	-0.0253407	-0.0997994	0.0493137	-0.167347	0.063418	0.0290689	-0.0885424	0.208139	-0.134636	0.190066	0.0155386	0.0311359	-0.035795
A9ULS4	A9ULS4|A0A0R4IH39|E9QE54|A0A2R8PWM6|Q5BJD1|A0A0R4IT88|F1RDG8|A8KBS0	rab6a	3	3	47.5	122.54	DANRE	23631.4	RAB6A, member RAS oncogene family	NA	0.880414	5.93319e-05	0.00193737	0.19345	0.254772	0.505786	-0.293378	0.0941105	0.41658	0.393585	0.0213972	0.0789294	0.161927	0.32248	-0.018239	-0.449999	0.00507889	-0.584869	0.151798	0.2597	-0.306177	-0.460471	-0.137044	0.353949	-0.864879	0.263828	-0.546348
Q6DGV5	Q6DGV5	rab10	10	6	43.7	137.68	DANRE	22869.9	RAB10, member RAS oncogene family	NA	0.780177	0.000166118	0.00340963	0.219094	0.196112	0.434598	-0.568094	0.00373035	0.0725701	-0.00701012	0.963134	0.978258	-0.106106	0.382435	-0.263816	-0.24194	-0.169427	-0.469488	0.293587	0.403708	-0.533224	-0.391112	-0.496356	0.437211	-0.437236	0.552759	-0.274306
A5PLC7	A5PLC7	rab8b	3	2	41.6	120.01	DANRE	23901	RAB8B, member RAS oncogene family	NA	0.582255	0.083058	0.177538	0.161568	0.637275	0.825865	-0.503626	0.156473	0.528408	-0.0829398	0.793127	0.863237	0.0940155	1.05721	-0.122061	-0.635771	-0.515451	-0.651865	0.537067	0.371823	0.10407	-0.30968	0.0312085	0.566177	0.0318133	0.0897296	0.669555
B8JLR8	B8JLR8|A0A0G2L264|A0A2R8QQ30	rab35b	5	4	36.8	111.28	DANRE	23192.9	RAB35, member RAS oncogene family b	NA	0.37188	0.0232466	0.0740304	0.297993	0.0786166	0.259235	-0.090168	0.573086	0.868977	-0.0162808	0.911949	0.945457	-0.0819924	0.0767742	-0.314787	-0.0437878	-0.00461554	-0.219242	0.306316	0.298518	-0.382585	-0.171274	-0.156677	0.136447	-0.0697629	0.0422972	-0.648659
A4FVK4	A4FVK4	A4FVK4	4	2	33.8	108.73	DANRE	23744.9	RAB8A, member RAS oncogene family	NA	0.106193	0.498681	0.62404	0.233672	0.179913	0.414847	-0.0503688	0.764694	0.941139	-0.177848	0.264814	0.421978	-0.131329	0.200582	-0.247726	-0.403337	-0.0996869	-0.611769	-0.0120041	-0.158664	-0.131191	-0.252666	-0.0288051	0.13532	0.028808	-0.163092	0.216571
Q5RGB5	Q5RGB5	rab3ab	2	2	24	56.73	DANRE	25152.7	RAB3A, member RAS oncogene family, b	SUBCELLULAR LOCATION: Cell membrane {ECO:0000256|ARBA:ARBA00004342, ECO:0000256|RuleBase:RU367096}; Lipid-anchor {ECO:0000256|ARBA:ARBA00004342, ECO:0000256|RuleBase:RU367096}; Cytoplasmic side {ECO:0000256|ARBA:ARBA00004342, ECO:0000256|RuleBase:RU367096}.	0.185153	0.385875	0.519295	-0.0881327	0.698883	0.859011	0.032574	0.886017	0.973909	0.305859	0.162248	0.307121	-0.0955895	-0.132433	-0.0635649	0.0693935	0.293056	0.175508	-0.0944843	0.0109009	0.423505	0.107186	-0.133076	0.466282	-0.458632	-0.387719	-0.501525
Q6PHI9	Q6PHI9|G1K2H7|Q68EK7	rab4a	2	2	16.4	44.58	DANRE	24287.1	Ras-related protein Rab-4A	SUBCELLULAR LOCATION: Cell membrane {ECO:0000305}; Lipid-anchor {ECO:0000305}; Cytoplasmic side {ECO:0000305}.	0.391053	0.137011	0.25157	-0.227465	0.408612	0.654791	-0.260032	0.346825	0.731724	0.358486	0.169923	0.316534	0.456802	0.547887	0.51341	-0.471651	-0.178132	-0.230562	0.353091	0.384654	0.672047	-0.363017	0.201417	0.387489	0.186422	0.221934	0.626
Q502Q0	Q502Q0	rab12	2	2	11.4	25.76	DANRE	26718.2	RAB12, member RAS oncogene family	NA	0.291796	0.136772	0.251277	0.107244	0.598343	0.799598	-0.634884	0.00711602	0.109061	-0.450332	0.0294623	0.0976534	-0.311995	0.213402	-0.0497308	0.356677	-0.00823118	-0.3931	-0.427779	0.423381	-0.935964	-0.0363253	-0.51035	0.177178	-0.0913766	0.46376	-0.118437
Q8AW60	Q8AW60|A0A286Y9D4|E7FGP9|E9QEY6	ivd	56	21	43.7	326.41	DANRE	46414.7	Butyryl-CoA dehydrogenase	NA	0.585856	0.00250716	0.0171526	0.566122	0.00530759	0.0482331	0.220863	0.214048	0.61011	0.240598	0.148289	0.289235	0.310047	0.138327	-0.0297416	-0.260371	0.491289	-0.348241	0.222862	0.191743	-0.519731	-0.491793	0.543464	0.204456	-0.534796	0.258844	-0.263096
E9QI36	E9QI36	hars	40	26	39.3	325.94	DANRE	58040.6	Histidine--tRNA ligase	SUBCELLULAR LOCATION: [Isoform 1]: Cytoplasm {ECO:0000269|PubMed:28934368}.; SUBCELLULAR LOCATION: [Isoform 2]: Mitochondrion {ECO:0000269|PubMed:28934368}.	0.0500041	0.642796	0.74554	0.00894013	0.938548	0.975783	0.177064	0.143796	0.506457	0.218128	0.0590392	0.156182	0.372065	-0.107982	0.201707	-0.0212065	-0.0318585	0.0513023	0.321289	0.1385	0.100676	-0.13267	0.281702	0.0389579	-0.0690678	-0.0162203	0.0761831
A0A286YAZ1	A0A286YAZ1|F1QUM3|A0A2R8Q7H5	A0A286YAZ1	75	20	25.3	325.92	DANRE	81950.6	Actin-depolymerizing factor	NA	0.381984	0.0114567	0.0458498	0.0949436	0.5095	0.734091	0.204925	0.167153	0.546999	0.491965	0.00227401	0.0172095	0.463649	0.165175	0.319141	-0.175292	0.2397	0.1839	0.610445	-0.0305339	0.00878705	-0.337274	0.166294	0.244006	-0.4071	0.156906	-0.0727179
Q52PJ5	Q52PJ5|E9QDU7	dpysl3	48	22	49	325.84	DANRE	61942.3	Dihydropyrimidinase-related protein 3	SUBCELLULAR LOCATION: Cytoplasm {ECO:0000250|UniProtKB:Q62952}. Cell projection, growth cone {ECO:0000250|UniProtKB:Q62952}.	0.332319	0.00520757	0.0274762	0.199553	0.0847127	0.269525	0.126097	0.25915	0.660581	0.258863	0.0214728	0.0791164	0.15284	0.132555	0.261361	-0.218608	0.257387	0.148134	0.453499	0.162912	-0.122741	-0.177357	0.217468	0.316158	-0.169059	0.121792	-0.0308356
F1R1P6	F1R1P6	nansa	38	21	56.5	325.83	DANRE	40606.8	N-acetylneuraminic acid synthase a	SUBCELLULAR LOCATION: Secreted {ECO:0000256|ARBA:ARBA00004613}.	-0.683878	0.049163	0.12422	-0.243718	0.486275	0.715902	-0.127774	0.713161	0.923223	-0.567934	0.0947004	0.214813	-0.209527	0.0736184	-0.163889	-0.221541	-0.341166	-0.312563	-0.139576	-0.343457	0.493485	-0.0909443	-0.394784	-0.0616657	1.05025	-0.324767	1.34148
Q6P0V6	Q6P0V6|B0S6P5	rpl8	55	21	59.9	325.65	DANRE	28294.5	60S ribosomal protein L8	SUBCELLULAR LOCATION: Cytoplasm.	0.481927	0.0806713	0.17406	0.300818	0.293259	0.548866	-0.275899	0.333409	0.724018	-0.094789	0.715229	0.810447	-0.0101441	0.555053	-0.126201	-0.540136	-0.176902	-0.557956	0.48436	0.486486	0.0851131	-0.562366	0.138102	0.524624	0.496697	0.131513	0.375773
F1R2V0	F1R2V0|F1QZP4	aoc2	37	18	33.1	324.98	DANRE	85758.7	Amine oxidase (Fragment)	NA	0.431699	0.0100796	0.0421667	0.240626	0.144003	0.365989	-0.384924	0.0273614	0.221928	-0.193851	0.199086	0.351789	-0.18382	0.207048	-0.294209	0.052501	-0.124104	-0.200683	0.284486	0.390305	-0.49838	0.111765	-0.321322	0.454094	-0.231842	0.273661	-0.334112
B5DDF0	B5DDF0	aoc2	2	2	24.2	71.56	DANRE	25757.3	Amine oxidase	NA	0.0280389	0.917339	0.947492	0.459955	0.132283	0.349717	-0.855592	0.0105792	0.131491	-1.28751	0.000324863	0.00462911	-0.319065	0.210333	-0.959657	0.373673	-0.429877	-1.20451	-0.14698	0.283633	-1.63074	0.594176	-1.12876	0.258219	0.185037	0.396031	-0.116825
Q1LXK4	Q1LXK4|A0A2R8QPU7|A0A2R8QF93|Q1LXK5	mov10b.1	30	27	30.3	324.9	DANRE	116975	Putative helicase mov-10-B.1	SUBCELLULAR LOCATION: Cytoplasm, P-body {ECO:0000250}.	-0.0902882	0.635086	0.740696	0.39754	0.0694011	0.241532	0.375244	0.0844373	0.394621	-0.112585	0.554988	0.689089	-0.0492971	-0.136163	-0.132491	0.086088	0.0377844	-0.206402	-0.138265	-0.067236	-0.0943458	0.209389	0.931199	-0.0372841	-0.214494	-0.152667	-0.11318
E7FAV9	E7FAV9	E7FAV9	5	4	6.2	40.81	DANRE	114834	RNA helicase	NA	0.319105	0.150615	0.268044	0.914203	0.00140389	0.0214508	0.989215	0.000759937	0.0308943	0.394117	0.0818537	0.196064	-0.281501	-0.806054	-0.0392671	-0.523258	0.328565	-0.524899	0.589518	-0.10061	-0.288389	-0.362564	0.973985	0.0290207	-0.868576	-0.556461	-0.956126
A9C3T0	A9C3T0|A0A2R8QQ34|A0A2R8Q5X2|A0A2R8QKE2|A0A140LGB8|Q6NW93	prkar2aa	30	22	53.4	324.88	DANRE	45260.3	Protein kinase, cAMP-dependent, regulatory, type II, alpha A	SUBCELLULAR LOCATION: Cell membrane {ECO:0000256|ARBA:ARBA00004236}. Membrane {ECO:0000256|ARBA:ARBA00004370}.	0.553325	0.000170885	0.00346247	0.311079	0.0176516	0.104802	-0.0432983	0.711016	0.922911	0.198948	0.0830264	0.197735	0.175826	0.29695	0.067521	-0.288809	0.264839	-0.0448022	0.295205	0.432267	-0.198812	-0.387604	0.372991	0.376944	-0.148673	0.311079	0.0290281
Q4VBU0	Q4VBU0	bckdha	46	20	58.9	324.84	DANRE	51006.4	2-oxoisovalerate dehydrogenase subunit alpha	NA	0.879678	0.000166127	0.00340963	0.546135	0.0100925	0.0738139	-0.107836	0.561989	0.862977	0.225706	0.201675	0.35482	0.135271	0.298757	-0.0415129	-0.388702	0.169917	-0.437616	0.237574	0.6183	-0.282105	-0.546887	0.761442	0.723804	-0.461921	0.349063	-0.131279
F1QSU0	F1QSU0	cavin4b	69	19	72.6	324.52	DANRE	35135.2	Muscle-restricted coiled-coil protein	SUBCELLULAR LOCATION: Cytoplasm, myofibril, sarcomere {ECO:0000256|ARBA:ARBA00004204}. Membrane, caveola {ECO:0000256|ARBA:ARBA00004345}.	0.929168	9.6282e-06	0.000726929	0.429088	0.0102376	0.0741151	0.31938	0.0435965	0.277043	0.81946	3.41969e-05	0.00112127	0.421746	0.216342	0.166786	-0.703434	0.332192	0.107443	0.819423	0.378513	0.0750256	-0.82869	0.7139	0.311464	-0.643452	0.303513	-0.331263
A0A2R8QA71	A0A2R8QA71|A0A2R8Q8M1|Q6PBK9	prdx6	59	20	70.6	324.49	DANRE	26375	Peroxiredoxin 6	NA	-0.088682	0.775202	0.845602	0.0376639	0.91047	0.962855	0.131954	0.694449	0.916765	0.00560839	0.985567	0.991592	0.21408	0.193451	0.185476	-0.567297	-0.0350757	-0.169016	0.470912	-0.0355027	0.420345	-0.480332	0.165319	0.222214	0.725655	-0.106439	0.950427
O42364	O42364|E9QBB8	apoeb	55	21	66.9	324.37	DANRE	31730.2	Apolipoprotein Eb	SUBCELLULAR LOCATION: Secreted {ECO:0000250|UniProtKB:P02649}. Secreted, extracellular space {ECO:0000250|UniProtKB:P02649}. Secreted, extracellular space, extracellular matrix {ECO:0000250|UniProtKB:P02649}.	0.485037	0.544067	0.664319	0.065919	0.938707	0.975783	-0.773548	0.374464	0.753246	-0.354431	0.656432	0.770394	-0.31403	1.57362	-0.620676	-1.48295	-1.26985	-0.782445	1.36384	-1.5101	-0.474919	-0.984947	-1.54029	1.08289	0.616247	0.0193925	1.07731
F1QQL4	F1QQL4	si:ch211-125o16.4	29	2	22.4	324.33	DANRE	168674	Si:ch211-125o16.4	NA	-0.428916	0.0507411	0.126694	-0.954874	0.000687314	0.0138357	0.36266	0.115709	0.460892	0.888618	0.00065916	0.00750401	1.11867	-0.426014	0.988583	-0.105888	0.0849269	0.505716	0.340028	-0.30149	0.907328	-0.131827	-0.649353	-0.729961	0.0354618	-0.292373	0.16808
A0A2R8Q0D2	A0A2R8Q0D2	A0A2R8Q0D2	2	2	22	310.38	DANRE	168560	Uncharacterized protein	NA	0.594043	0.0885583	0.185359	-0.0307521	0.930973	0.972501	-0.443072	0.225713	0.623687	0.181723	0.582592	0.712618	0.438575	0.24672	0.242651	0.126743	-0.021837	-0.692859	-0.034306	0.617809	0.104055	-1.12625	0.0332036	0.460293	-0.319281	0.41688	0.684317
E7F2U7	E7F2U7	zp3.2	51	3	41.8	324.05	DANRE	48127.7	Zona pellucida sperm-binding protein 3	SUBCELLULAR LOCATION: Secreted, extracellular space, extracellular matrix {ECO:0000256|RuleBase:RU367066}. Cell membrane {ECO:0000256|RuleBase:RU367066}; Single-pass type I membrane protein {ECO:0000256|RuleBase:RU367066}.	-1.81468	0.122474	0.232346	-1.48775	0.231822	0.477267	-0.88417	0.469156	0.817852	-1.2111	0.290042	0.445424	-1.83896	-1.14174	-1.59228	-1.80667	-2.1086	-1.6336	-2.14201	-1.94532	1.82262	-1.70974	-2.64432	-0.30265	2.15909	-2.26685	2.95949
A0A2R8RWR2	A0A2R8RWR2	zp3.2	6	2	35.8	295.2	DANRE	47506.1	Zona pellucida sperm-binding protein 3	SUBCELLULAR LOCATION: Secreted, extracellular space, extracellular matrix {ECO:0000256|RuleBase:RU367066}. Cell membrane {ECO:0000256|RuleBase:RU367066}; Single-pass type I membrane protein {ECO:0000256|RuleBase:RU367066}.	-2.49252	0.0970454	0.198472	-1.70933	0.276467	0.530255	-1.29979	0.403271	0.773841	-2.08298	0.158828	0.302663	-2.92109	-1.68835	-3.22183	-2.22891	-2.52807	-2.07311	-3.18002	-2.9377	1.02515	-2.28572	-4.81306	-0.0226239	2.5968	-4.18037	3.05889
F1QIH9	F1QIH9	zp3.2	7	2	30.6	264.9	DANRE	47390.9	Zona pellucida sperm-binding protein 3	SUBCELLULAR LOCATION: Secreted, extracellular space, extracellular matrix {ECO:0000256|RuleBase:RU367066}. Cell membrane {ECO:0000256|RuleBase:RU367066}; Single-pass type I membrane protein {ECO:0000256|RuleBase:RU367066}.	-1.74231	0.185359	0.308866	-1.79703	0.204626	0.445123	-1.11206	0.423317	0.788219	-1.05735	0.41124	0.56627	-2.19819	-1.25706	-1.52785	-2.23724	-2.46547	-1.98807	-2.31977	-2.0026	2.18054	-2.23409	-3.25602	-0.338417	2.38362	-2.67536	2.78353
F1QYE3	F1QYE3	zp3.2	14	5	36.1	252.57	DANRE	48047.7	Zona pellucida sperm-binding protein 3	SUBCELLULAR LOCATION: Secreted, extracellular space, extracellular matrix {ECO:0000256|RuleBase:RU367066}. Cell membrane {ECO:0000256|RuleBase:RU367066}; Single-pass type I membrane protein {ECO:0000256|RuleBase:RU367066}.	-1.65194	0.0878803	0.184442	-1.30338	0.200509	0.440849	-0.661719	0.505429	0.836054	-1.01028	0.279214	0.435604	-1.08868	-0.829703	-0.90721	-1.15917	-1.51282	-1.29302	-1.48941	-1.43569	1.7045	-1.11127	-2.0962	-0.101696	1.9716	-1.78395	2.75556
Q5RHR0	Q5RHR0|Q499A8	parp1	30	24	27.8	323.23	DANRE	113686	Poly [ADP-ribose] polymerase	SUBCELLULAR LOCATION: Chromosome {ECO:0000256|PIRNR:PIRNR000489}. Nucleus {ECO:0000256|ARBA:ARBA00004123, ECO:0000256|PIRNR:PIRNR000489}.	-0.650743	0.00553771	0.028658	-0.0469169	0.827653	0.92379	-0.00779406	0.971122	0.991985	-0.61162	0.00811867	0.0402821	-0.355276	-0.399808	-0.301431	0.665853	-0.0158273	0.25577	-0.484195	-0.339939	-0.527135	0.339872	-0.336783	-0.539931	0.242648	0.195114	0.270034
F1Q931	F1Q931|X1WDE4|A0A2R8RRR9	larp1b	31	23	24.2	322.99	DANRE	121847	La ribonucleoprotein 1B	NA	0.476801	0.00244149	0.0168854	0.227653	0.120762	0.331769	-0.330612	0.0315237	0.236247	-0.0814646	0.531927	0.670967	-0.1095	0.258859	-0.123809	0.071397	-0.0904992	-0.320404	0.218234	0.434415	-0.300958	0.0650689	-0.0857781	0.384034	-0.194624	0.301083	-0.470655
Q6NXC1	Q6NXC1	rbm4.3	52	23	70.3	322.54	DANRE	38348.6	RNA-binding motif protein 4.3	NA	0.0865934	0.408752	0.540852	0.334432	0.00937158	0.0700768	0.195854	0.0973757	0.422462	-0.0519849	0.616866	0.739004	-6.33227e-07	0.0637094	0.0562862	-0.0860309	0.060555	-0.176472	0.310416	0.0258537	-0.127785	-0.118329	0.446345	0.0950768	-0.0131887	0.121701	0.177516
F1R818	F1R818|Q4VBV9	nit2	38	19	69.7	322.38	DANRE	31394.2	Omega-amidase NIT2	NA	0.172309	0.357432	0.492469	-0.0564074	0.776958	0.902053	-0.12699	0.526323	0.847838	0.101726	0.582764	0.712692	0.219219	0.0508989	0.161726	-0.115944	-0.0794548	-0.0871036	0.0838815	0.350311	0.339961	-0.162018	0.301704	0.667738	0.126567	-0.152815	0.378292
F1QE25	F1QE25|E9QI84	naa15a	33	15	27.3	322.35	DANRE	102027	N-alpha-acetyltransferase 15, NatA auxiliary subunit a	NA	-0.309417	0.0144566	0.0538365	-0.53794	0.000566086	0.0123778	0.0883056	0.468615	0.817852	0.316828	0.0127063	0.0548472	0.88266	-0.0941471	0.495598	0.311036	0.0432691	0.501699	0.0411863	-0.0141015	0.400192	0.285759	0.0118374	-0.19653	0.0942235	0.0799465	0.321818
A0A0R4I9S5	A0A0R4I9S5|F1QVJ2|B8A5C4	naa15b	11	11	22.6	236.05	DANRE	101901	N-alpha-acetyltransferase 15, NatA auxiliary subunit b	NA	0.610697	0.00417876	0.023578	0.321673	0.114153	0.321424	-0.285943	0.156049	0.527821	0.0030812	0.986275	0.991592	0.0808428	0.513233	-0.105427	-0.434995	-0.189612	-0.619309	0.365404	0.385744	-0.19922	-0.424783	0.156894	0.429474	-0.164758	0.258901	0.169098
B0S6P6	B0S6P6|B0S6P7	ddx3xa	30	6	34.5	322.13	DANRE	78676.1	RNA helicase	NA	-0.0142303	0.928482	0.953901	-0.139253	0.42212	0.663706	-0.0144358	0.932819	0.984841	0.110587	0.489618	0.636594	0.139407	0.18374	0.13194	-0.213006	-0.0511818	0.232912	-0.0391594	0.0448366	0.302226	-0.237551	0.277446	0.101084	0.327881	-0.0224453	0.486813
F1RCB2	F1RCB2|X1WFB0|X1WHB2	ddx3xb	7	7	32.1	319.45	DANRE	76230.4	RNA helicase	NA	-0.202759	0.173794	0.296087	-0.0898886	0.564715	0.776927	0.11345	0.469089	0.817852	0.00057976	0.996778	0.997637	-0.00530188	-0.0694063	-0.0199625	-0.129115	-0.0836368	0.24644	-0.310084	-0.228818	-0.026125	-0.150112	0.270343	-0.171134	0.101607	-0.148946	0.37035
Q1L8R2	Q1L8R2|I3ITB4|A0A2R8Q1G3|I3ITQ3	sfpq	42	24	41.8	321.56	DANRE	72039.7	Splicing factor proline/glutamine-rich	SUBCELLULAR LOCATION: Nucleus speckle {ECO:0000256|ARBA:ARBA00004324}.	0.239088	0.0256038	0.0793206	0.169293	0.12217	0.334111	0.0102941	0.92139	0.982895	0.0800891	0.413198	0.568349	0.0402924	0.213724	-0.0119927	-0.168977	0.0518128	0.0672712	0.101767	0.0151116	-0.263233	-0.225495	0.228553	0.112791	-0.105027	0.126708	0.0114803
F1QLT9	F1QLT9|A0A2R8QMS9|F1QCM2|F1QL29|E9QJM9	rars1	35	22	38.4	321.43	DANRE	76382.4	Arginine--tRNA ligase, cytoplasmic	NA	-0.196742	0.0513259	0.127851	0.103104	0.316324	0.571032	-0.15973	0.130551	0.486339	-0.459576	0.000245228	0.00390214	-0.266149	0.177638	-0.176471	0.102573	-0.13031	-0.159355	0.0045206	-0.0604714	-0.183652	0.173073	-0.15412	0.109673	0.427976	0.0388693	0.349056
A0A1L1QZE0	A0A1L1QZE0	A0A1L1QZE0	9	4	23.5	232.37	DANRE	78631.7	Uncharacterized protein	NA	-0.672919	0.450226	0.580125	-1.03139	0.289411	0.544468	-1.0071	0.300423	0.696376	-0.648631	0.466387	0.616244	-1.10895	0.836751	-0.678665	-1.36133	-1.18778	-0.735932	-1.12624	-0.961888	1.35247	-1.44034	-1.65846	-0.0146729	1.73001	-1.12842	2.4951
A0A1L1QZV6	A0A1L1QZV6	si:dkey-172k15.19	10	4	23.7	214.73	DANRE	84113.2	Uncharacterized protein	NA	-1.2924	0.259408	0.3918	-1.48822	0.230805	0.475987	-1.21543	0.323199	0.716939	-1.01961	0.369056	0.526218	-1.6619	0.718984	-1.15049	-1.8817	-1.8151	-1.32811	-2.16079	-1.93614	1.41723	-1.60139	-2.5312	-0.134425	2.03265	-2.46284	2.80562
F1QP99	F1QP99	pdia7	53	20	40.5	321.08	DANRE	55290.2	Protein disulfide-isomerase	SUBCELLULAR LOCATION: Endoplasmic reticulum lumen {ECO:0000256|ARBA:ARBA00004319}.	0.30128	0.126926	0.238579	0.438451	0.0468457	0.19005	-0.177272	0.390264	0.76597	-0.314443	0.112559	0.239589	-0.369286	0.374446	-0.258063	-0.284581	0.073268	-0.196561	0.283136	0.349167	-0.232545	-0.438256	0.166607	0.268999	0.322784	0.413825	0.601368
Q6DRD1	Q6DRD1	atp5po	105	18	78.9	321.02	DANRE	22539.1	ATP synthase subunit O, mitochondrial	SUBCELLULAR LOCATION: Mitochondrion inner membrane {ECO:0000256|ARBA:ARBA00004273}.	1.00244	0.000151858	0.0033073	0.77795	0.00223636	0.0292387	0.206338	0.331367	0.723093	0.430832	0.0406251	0.121914	0.263163	0.249791	-0.0871635	-0.337863	0.595866	-0.397786	0.324335	0.511078	-0.462532	-0.90192	0.90041	0.40906	-0.837692	0.432199	-0.330173
A5WWJ4	A5WWJ4|A5WWJ5	matn1	40	23	56.6	320.88	DANRE	54057	Matrilin 1	NA	0.418691	0.22616	0.355466	0.435272	0.243068	0.491334	-0.64304	0.0941479	0.41658	-0.659621	0.0667923	0.169888	-0.164649	0.243563	-0.669732	0.0667034	-1.17988	-0.872725	0.91448	0.636598	-0.390276	0.203651	-0.001816	0.518401	0.188828	0.817305	0.0819218
Q5NJJ5	Q5NJJ5|Q6PYX2	matn4	19	12	17.6	195.1	DANRE	109144	Matrilin-4	NA	0.248248	0.154351	0.272445	0.286715	0.129861	0.345988	-0.0326751	0.85653	0.967601	-0.0711423	0.671628	0.779714	0.408985	0.250542	0.0527831	0.0283791	0.0730969	-0.442511	0.302351	0.351443	0.00773627	-0.152439	0.504942	0.450856	0.134554	0.251713	0.30107
Q98TZ8	Q98TZ8	flot2a	26	14	54.6	320.64	DANRE	47262.5	Flotillin-2a	SUBCELLULAR LOCATION: Membrane {ECO:0000250}. Endosome {ECO:0000250}. Note=In neuronal cells, associated with GPI-anchored cell-adhesion molecules. {ECO:0000250}.	0.572658	0.0273214	0.0827865	0.599983	0.0314189	0.147904	-0.23835	0.355014	0.737981	-0.265674	0.269056	0.426201	-0.0407812	0.187998	-0.317271	-0.0903485	-0.163902	-0.757811	0.425653	0.0578036	-1.21792	-0.271705	-0.212139	0.526112	-0.485713	0.247637	-0.423316
Q6PFT0	Q6PFT0	flot2b	3	3	28.2	165.13	DANRE	47367.7	Flotillin	SUBCELLULAR LOCATION: Endosome {ECO:0000256|ARBA:ARBA00004177, ECO:0000256|RuleBase:RU366054}. Membrane {ECO:0000256|RuleBase:RU366054}.	0.667469	0.0352769	0.0993016	0.423281	0.1907	0.428722	-0.206076	0.513107	0.840599	0.038112	0.895196	0.936211	-0.187454	-0.25291	-0.54274	-0.00517138	0.0325534	-0.347368	0.063518	0.0626096	-1.05746	-0.120593	-0.427496	0.0261163	-1.16035	0.546589	-1.00135
A5PL98	A5PL98	sdhb	65	24	65	318.6	DANRE	32652.1	Succinate dehydrogenase [ubiquinone] iron-sulfur subunit, mitochondrial	SUBCELLULAR LOCATION: Mitochondrion inner membrane {ECO:0000250}; Peripheral membrane protein {ECO:0000250}; Matrix side {ECO:0000250}.	0.733095	0.000541393	0.00671681	0.5086	0.0116862	0.080212	0.11949	0.502307	0.833716	0.343985	0.0515867	0.143281	0.23564	0.102512	0.0680976	-0.26303	0.400006	-0.16549	0.164371	0.407009	-0.417928	-0.579659	0.751663	0.426854	-0.528248	0.340385	-0.284682
Q5PR98	Q5PR98	ndrg2	46	19	45.1	318.27	DANRE	40752.4	Protein NDRG2	SUBCELLULAR LOCATION: Cytoplasm {ECO:0000250}.	0.43774	0.00189915	0.0147062	0.196187	0.130546	0.346794	-0.0203413	0.869588	0.971381	0.221212	0.0711601	0.17709	0.249944	0.18496	0.234713	-0.0136047	0.241459	-0.147748	0.299124	0.455411	-0.0697403	-0.110996	0.248356	0.146865	-0.222217	0.346048	-0.270859
B8JIS1	B8JIS1	atp5pb	87	20	49.6	317.99	DANRE	28283.3	ATP synthase F(0) complex subunit B1, mitochondrial	NA	0.925174	0.00225283	0.0161989	0.923359	0.00389438	0.0403655	-0.167638	0.534766	0.852693	-0.165824	0.507645	0.650426	0.0684804	0.27589	-0.341667	0.0479257	0.156206	-0.883286	0.220459	0.679598	-1.06029	-0.372108	0.73084	0.62863	-0.748993	0.563106	-0.480295
Q6P5M3	Q6P5M3|F6P0J0|A3KQ06	rps9	53	25	67	317.43	DANRE	22522.9	40S ribosomal protein S9	NA	0.292634	0.167271	0.288504	0.446218	0.0595762	0.221049	-0.0903917	0.682366	0.911077	-0.243976	0.244207	0.399617	-0.0886991	0.334352	-0.416127	-0.409567	-0.0474829	-0.417828	0.470784	0.289355	-0.113702	-0.414866	0.138085	0.337104	0.51868	0.149271	0.2453
Q6DRE5	Q6DRE5|G1K2N3|E7EZW9	nop56	25	19	44.1	317.18	DANRE	60900	NOP56	SUBCELLULAR LOCATION: Nucleus, nucleolus {ECO:0000256|ARBA:ARBA00004604}.	-0.109159	0.644425	0.747019	0.0877678	0.730689	0.877626	-0.124788	0.625401	0.889718	-0.321715	0.187343	0.337143	0.037784	0.216452	-0.0230699	-0.192422	-0.0312203	-0.277226	-0.0135569	0.0921898	0.119439	-0.271391	0.200776	0.330713	0.679203	0.0677934	0.928395
F1Q898	F1Q898	lsm14b	54	19	53.1	316.7	DANRE	41653.3	LSM family member 14B	NA	-2.28264	0.0866551	0.182943	-0.994301	0.467765	0.700377	-0.855526	0.530996	0.849969	-2.14386	0.105302	0.228749	-2.72327	-2.33807	-2.52609	-2.45839	-2.72315	-2.28081	-2.817	-2.70693	-0.0025732	-2.31455	-3.09231	-0.00444183	2.73891	-3.0384	3.07674
Q1LXE1	Q1LXE1|B3DIH3|Q1LXE2	hapln1a	42	18	55.6	316.37	DANRE	38257.3	Hyaluronan and proteoglycan link protein 1a	NA	0.758488	0.015101	0.0553671	0.150685	0.614843	0.809817	-0.315587	0.300028	0.695969	0.292216	0.299967	0.456914	0.589746	0.598518	0.0608334	-0.695872	-0.186351	-0.0548876	0.874634	0.33404	-0.543104	-0.351497	-0.196787	0.630754	-0.0598053	0.354366	-0.00910043
A0A2R8QBI6	A0A2R8QBI6|E7FBW8|A0A2R8PWS0|A0A0G2L6W2|A0A2R8Q314	A0A2R8QBI6	5	4	16.8	78.34	DANRE	40937.7	Uncharacterized protein	NA	-0.0418489	0.672886	0.768632	-0.186476	0.0983943	0.29303	-0.0909842	0.400495	0.772722	0.0536427	0.589244	0.71702	0.06694	-0.00856545	-0.0345406	0.115168	-0.170788	0.232392	0.0371532	0.0532895	0.21323	0.18667	-0.0672766	0.167043	0.0234181	-0.115712	-0.0618048
F1R2D9	F1R2D9	si:ch211-51c14.1	36	21	58.8	315.48	DANRE	45758.5	Si:ch211-51c14.1	NA	0.788693	3.29799e-05	0.00140375	0.350689	0.0238137	0.125002	-0.210694	0.147873	0.510565	0.22731	0.0963305	0.217177	0.157405	0.481417	0.0441775	-0.193832	0.136598	-0.275775	0.414961	0.547047	-0.116775	-0.594826	0.357284	0.629856	-0.158256	0.396247	-0.153292
B8JLW8	B8JLW8|Q6PH36	gmps	25	23	41.6	315.41	DANRE	77675.9	Glutamine amidotransferase	NA	-0.0571195	0.62449	0.731668	-0.0196903	0.875322	0.944912	0.0698433	0.579996	0.870177	0.0324141	0.780483	0.854905	0.146148	0.130583	0.276784	-0.142908	0.0336614	-0.00388358	0.212629	-0.0037059	0.150621	-0.0215611	0.12189	0.00760204	0.212978	0.0770557	0.391504
Q7ZUP5	Q7ZUP5|A0A0R4IH71	dnaja2a	40	13	51.2	315.14	DANRE	46164.2	DnaJ (Hsp40) homolog, subfamily A, member 2	NA	0.0278465	0.738244	0.818311	-0.12175	0.190467	0.428584	0.0241443	0.788337	0.947391	0.173741	0.0530754	0.146199	0.247757	0.0960142	0.251088	0.0150949	0.0660556	0.322203	0.0399292	0.158413	0.0957679	-0.0340325	0.216377	0.0462375	0.0790865	0.0325741	0.161704
A5WVI9	A5WVI9|A0A2R8QPX2|A0A2R8RM85	dnaja2b	7	7	34.6	217.81	DANRE	46220.1	DnaJ heat shock protein family (Hsp40) member A2b	NA	-0.345096	0.00675872	0.0327205	-0.20975	0.0930646	0.282841	-0.113929	0.342562	0.729772	-0.249275	0.036879	0.11398	0.0763145	-0.0298195	0.173417	0.238457	-0.233935	-0.0184466	-0.179205	0.0274426	0.300835	0.416789	0.182979	0.0401249	0.397307	0.111088	0.476668
A0A2R8Q696	A0A2R8Q696|F1R7V9|X1WFN0|A0A2R8Q335	eml2	35	20	27.1	314.75	DANRE	93234.3	EMAP-like 2	NA	0.179872	0.0787966	0.171492	0.0759455	0.468795	0.701258	-0.0118139	0.909345	0.981067	0.0921121	0.346154	0.503548	0.148867	0.0704784	0.0539963	-0.225866	0.0367851	-0.26151	0.133064	0.0463641	-0.0121721	-0.0618508	0.00487285	0.139697	-0.133334	0.0236784	-0.0182166
Q7SZC2	Q7SZC2	cse1l	33	23	25.1	313.41	DANRE	110710	Exportin-2	SUBCELLULAR LOCATION: Cytoplasm {ECO:0000305|PubMed:20933420}. Nucleus {ECO:0000250|UniProtKB:P55060}. Apical cell membrane {ECO:0000269|PubMed:20933420}; Peripheral membrane protein {ECO:0000305|PubMed:20933420}. Basal cell membrane {ECO:0000269|PubMed:20933420}; Peripheral membrane protein {ECO:0000305|PubMed:20933420}. Lateral cell membrane {ECO:0000269|PubMed:20933420}; Peripheral membrane pr…	-0.0460203	0.717045	0.801886	-0.0150652	0.912328	0.963697	-0.0760713	0.580485	0.870446	-0.107026	0.404692	0.559074	0.0184227	0.149774	0.0892875	0.000569657	-0.0541118	-0.163681	0.0306688	-0.0244611	0.145609	-0.160977	0.0454761	0.0725655	0.209379	0.135784	0.468772
F1QW60	F1QW60|F1QQN9|F1QNN4	2021-09-02	43	12	47.6	312.94	DANRE	46354	Septin 2 (Fragment)	SUBCELLULAR LOCATION: Cell projection, cilium membrane {ECO:0000256|ARBA:ARBA00004309}. Cleavage furrow {ECO:0000256|ARBA:ARBA00004626}. Cytoplasm, cytoskeleton, spindle {ECO:0000256|ARBA:ARBA00004186}. Membrane {ECO:0000256|ARBA:ARBA00004370}. Midbody {ECO:0000256|ARBA:ARBA00004214}.	0.294018	0.0378675	0.103649	0.297896	0.049284	0.1963	-0.0533497	0.70373	0.920407	-0.0572275	0.659806	0.772368	-0.0336151	0.281036	0.00996848	-0.21677	-0.0421393	-0.329355	0.329952	0.149487	-0.124199	-0.243111	0.247974	0.346009	-0.0227045	0.151249	0.234294
Q7SY26	Q7SY26	Q7SY26	13	6	48.9	197.55	DANRE	31865.1	Zgc:63587	SUBCELLULAR LOCATION: Cell projection, cilium membrane {ECO:0000256|ARBA:ARBA00004309}. Cleavage furrow {ECO:0000256|ARBA:ARBA00004626}. Cytoplasm, cytoskeleton, spindle {ECO:0000256|ARBA:ARBA00004186}. Membrane {ECO:0000256|ARBA:ARBA00004370}. Midbody {ECO:0000256|ARBA:ARBA00004214}.	0.195798	0.084025	0.178881	0.0313009	0.786005	0.905259	0.0348973	0.762204	0.940129	0.199394	0.0791019	0.191349	0.232294	0.296028	0.200966	-0.0984021	-0.0106119	0.00323754	0.330361	-0.0466526	0.0979845	-0.124121	0.175015	0.131399	-0.13834	0.139321	0.097768
A0A0G2KQA6	A0A0G2KQA6|E7FAB6|E9QBI1	sept4b	8	6	26.1	127.31	DANRE	49376.6	Septin-type G domain-containing protein	NA	-0.240913	0.0669318	0.154133	-0.601845	0.000489731	0.011375	-0.0471654	0.722619	0.926826	0.313767	0.0219175	0.0802737	0.572982	-0.189554	0.569372	0.295312	-0.255431	0.324138	0.0274893	0.00346936	0.263235	-0.0124163	-0.280299	-0.0670928	-0.0687749	-0.235816	0.260537
A0A0R4IEM0	A0A0R4IEM0|E9QC85	A0A0R4IEM0	4	4	18	56.37	DANRE	34152.2	Zgc:162239	NA	-1.09944	0.0987587	0.200553	-0.295782	0.664865	0.841323	-0.0998491	0.883344	0.973741	-0.903504	0.167579	0.313641	-1.36729	-1.43387	-0.970109	0.983111	-0.452968	0.847911	-1.58028	-1.00703	-1.97938	0.784693	-1.45574	-1.61409	-0.373082	-0.197612	-1.24957
A0A0R4IG09	A0A0R4IG09|F1QYM4|A0A0R4ICV9|F1R2E7	eif4h	33	19	59.5	312.89	DANRE	28061.1	Eukaryotic translation initiation factor 4H	SUBCELLULAR LOCATION: Cytoplasm, perinuclear region {ECO:0000256|ARBA:ARBA00004556}.	-0.221408	0.0747786	0.165878	0.020067	0.873254	0.943483	0.19056	0.146566	0.509885	-0.0509144	0.663028	0.774107	0.0361804	-0.142827	0.0233903	-0.0430129	-0.0899483	0.304512	0.157794	-0.116377	0.00125793	0.0214069	0.266361	-0.0198907	0.34882	-0.037538	0.241785
A0A0N4SU18	A0A0N4SU18|F1R8R0|A0A2R9YJI9|X1WGB2	A0A0N4SU18	62	18	47.5	312.2	DANRE	40453.9	Zgc:123103 (Fragment)	NA	0.485453	0.0538751	0.132074	0.514596	0.0578622	0.216846	0.409187	0.121917	0.470264	0.380044	0.120837	0.250874	-0.230797	0.187012	0.224059	-0.569973	0.321437	0.555959	0.747148	-0.0353986	-0.523711	-0.758991	0.494336	0.321266	0.0203907	-0.0257323	-0.186091
F1QHT9	F1QHT9|A0A0R4IQ70|A0A0R4IKV2	ddx19	31	15	53.5	311.64	DANRE	55188	RNA helicase	NA	0.392516	0.00143607	0.0123409	0.0465648	0.664419	0.84127	0.120946	0.269838	0.669527	0.466898	0.000355889	0.00486356	0.383655	0.0354473	0.275026	-0.27902	0.162039	0.0232121	0.197263	0.160136	0.0256587	-0.372055	0.311056	0.188836	-0.310265	0.0256061	-0.198698
B3DFU8	B3DFU8|F1Q5T4|A0A0J9YIV9	LOC563448	3	2	18.8	100.68	DANRE	53852.9	RNA helicase	NA	-0.971026	0.000335874	0.00513526	-0.630985	0.0122685	0.0824097	0.200527	0.371713	0.751337	-0.139513	0.499079	0.644338	-0.132059	-0.660522	0.265166	0.357859	-0.128112	0.472215	-0.607937	-0.664637	0.411491	0.00863816	-0.394296	-0.888776	0.511353	-0.0953028	0.697016
Q7ZUZ2	Q7ZUZ2|Q4V943	actr1	34	21	59.3	311.55	DANRE	42518.9	Actin-related protein 1, centractin	NA	0.063915	0.577431	0.693967	0.131966	0.29461	0.550183	0.0065644	0.957487	0.990094	-0.0614864	0.591806	0.719364	0.0663917	0.247273	0.166996	-0.080725	0.0231582	-0.121171	0.292691	0.0726827	-0.0142813	-0.0944915	0.153499	0.100906	0.204327	0.178679	0.31477
A0A0R4IMY9	A0A0R4IMY9|F1RBV6|A0A0R4IAV8|A0A0R4IWK8	dtnba	38	23	34.9	311.55	DANRE	70347	Dystrobrevin	SUBCELLULAR LOCATION: Cytoplasm {ECO:0000256|ARBA:ARBA00004496, ECO:0000256|PIRNR:PIRNR038204}.	0.502989	0.00386357	0.0223158	0.309493	0.0666915	0.235201	-0.108677	0.494215	0.829321	0.0848186	0.563366	0.69622	0.109292	0.343519	-0.148991	-0.106589	-0.0992844	-0.250832	0.326465	0.35237	-0.03519	-0.076203	0.457008	0.505935	-0.46518	0.145136	-0.0170236
F1R319	F1R319	slc25a11	52	23	64.6	311.42	DANRE	34039	Solute carrier family 25 member 11	SUBCELLULAR LOCATION: Membrane {ECO:0000256|ARBA:ARBA00004141}; Multi-pass membrane protein {ECO:0000256|ARBA:ARBA00004141}.	0.6224	0.00710847	0.0338199	0.286713	0.19604	0.434598	-0.301214	0.1758	0.557462	0.0344731	0.862161	0.913464	0.274859	0.268456	-0.360923	0.212504	0.242381	-0.298934	0.0425652	0.363158	-0.479101	-0.124488	-0.0728816	0.258448	-0.612063	0.597547	-0.477944
B8A4X7	B8A4X7	limch1a	37	24	24.1	310.77	DANRE	115510	LIM and calponin homology domains 1a	NA	-0.0394157	0.948488	0.965075	0.510607	0.443816	0.684023	0.081892	0.901123	0.979029	-0.468131	0.448161	0.601257	-1.09333	-0.746318	-1.13035	0.499966	0.6558	0.825818	-0.631494	-0.438369	-1.99364	0.442609	-1.03612	-0.520144	-1.08721	0.0281844	-1.37435
Q7T1D8	Q7T1D8	phb	45	18	57.9	310.37	DANRE	29741.5	Prohibitin	SUBCELLULAR LOCATION: Cell membrane {ECO:0000256|ARBA:ARBA00004236}. Mitochondrion inner membrane {ECO:0000256|ARBA:ARBA00004273, ECO:0000256|RuleBase:RU366048}.	0.256711	0.169186	0.290386	0.268758	0.18171	0.417624	-0.0233652	0.904188	0.979898	-0.0354123	0.843861	0.901007	0.183335	0.310093	0.0441814	-0.160096	0.346414	-0.283019	-0.0537894	0.343052	8.94359e-05	-0.419692	0.47209	0.275035	0.333412	0.184899	0.332612
Q0P4B4	Q0P4B4	tagln	67	16	88.9	288.23	DANRE	22287	Transgelin	NA	-0.764265	0.101543	0.204246	-0.231366	0.629378	0.819316	-0.204914	0.668755	0.905433	-0.737813	0.112695	0.239798	-0.585114	0.248242	-0.0601543	0.572226	0.745119	0.291002	-0.827894	-1.11785	-0.631805	1.02117	-1.35088	-0.120044	-0.156375	-0.102226	0.528162
A0A2R8QQS8	A0A2R8QQS8|Q803W9	A0A2R8QQS8	48	15	79.6	310.27	DANRE	24625.9	Transgelin	NA	0.304011	0.0780991	0.170618	-0.164699	0.354596	0.604088	-0.00464439	0.978809	0.993871	0.464066	0.0120298	0.0531204	0.499648	0.358487	0.512805	-0.386601	0.0197256	-0.0950322	0.327221	0.0640202	0.349451	-0.244719	0.109111	0.14077	-0.176056	0.063377	0.217985
B8JLZ3	B8JLZ3	anxa1b	44	19	62.8	310.02	DANRE	37644.2	Annexin	SUBCELLULAR LOCATION: Basolateral cell membrane {ECO:0000256|ARBA:ARBA00004187}. Cell membrane {ECO:0000256|ARBA:ARBA00004236}. Cell projection, cilium {ECO:0000256|ARBA:ARBA00004138}. Cytoplasm {ECO:0000256|ARBA:ARBA00004496}. Lateral cell membrane {ECO:0000256|ARBA:ARBA00004124}. Membrane {ECO:0000256|ARBA:ARBA00004370}. Nucleus {ECO:0000256|ARBA:ARBA00004123}.	0.361312	0.132748	0.246021	-0.675377	0.0158491	0.0980482	0.0772014	0.755906	0.937785	1.11389	0.000277709	0.0042229	1.24385	0.00302817	1.15006	-0.683379	0.129132	0.312649	0.296552	0.0947577	0.677052	-0.575525	0.0858935	0.0602184	-0.0830828	0.215294	0.270038
[truncated: 5,358 more rows]

## Sheet: adjP < 0.05 
											1.5 mo KO to 1.5 mo WT			4 mo KO to 4 mo WT			4 mo KO to 1.5 mo KO			4 mo WT to 1.5 mo WT			TMT Log2 Values
[truncated: 6,343 more rows]

## Sheet: Raw data
id	Proteome_onVera_20201216_126C	Proteome_onVera_20201216_127N	Proteome_onVera_20201216_127C	Proteome_onVera_20201216_128N	Proteome_onVera_20201216_128C	Proteome_onVera_20201216_129N	Proteome_onVera_20201216_129C	Proteome_onVera_20201216_130C	Proteome_onVera_20201216_131N	Proteome_onVera_20201216_131C	Proteome_onVera_20201216_132N	Proteome_onVera_20201216_132C	Proteome_onVera_20201216_133N	Proteome_onVera_20201216_133C	Proteome_onVera_20201216_134N	tr1M_KO - tr1M_WT.logFC	tr1M_KO - tr1M_WT.P.Value	tr1M_KO - tr1M_WT.adj.P.Val	tr1M_KO - tr1M_WT.Q.Value	tr4M_KO - tr4M_WT.logFC	tr4M_KO - tr4M_WT.P.Value	tr4M_KO - tr4M_WT.adj.P.Val	tr4M_KO - tr4M_WT.Q.Value	tr4M_KO - tr1M_KO.logFC	tr4M_KO - tr1M_KO.P.Value	tr4M_KO - tr1M_KO.adj.P.Val	tr4M_KO - tr1M_KO.Q.Value	tr4M_WT - tr1M_WT.logFC	tr4M_WT - tr1M_WT.P.Value	tr4M_WT - tr1M_WT.adj.P.Val	tr4M_WT - tr1M_WT.Q.Value	accession_number	numColumnsProteinObserved	numSpectraProteinObserved	numPepsUnique	numPepsUniqueSubgroupSpecificCI	accession_numbers	species	protein_mw	percentCoverage	groupNum	subgroupNum	scoreUnique	scoreUniqueSubgroupSpecificCI	entry_name	gene	subcellular_location
[truncated: 6,342 more rows]
