# Supplementary material for: Dynamic regulation of inter-organelle communication by ubiquitylation controls skeletal muscle development and disease onset
Source: eLife. 2023 Jul 11;12:e81966. doi: 10.7554/eLife.81966 (PMC10356137; doi:10.7554/eLife.81966)
Supplement: Supplementary file 2. [file elife-81966-supp2.xlsx]

## Sheet: Formatted data
							Ub site-level statistic (Ubiquitylome data)						Protein-level statistics (Proteomics data)
							1.5 mo KO to 1.5 mo WT			4 mo KO to 4 mo WT			1.5 mo KO to 1.5 mo WT			4 mo KO to 4 mo WT			TMT Log2 Values
Ub identifier	Protein accession number	Primary and Secondary Accession number	Gene	Modified site	Peptide sequence	Ambiguopus modification? (> 0 means yes)	Log2 fold-change	p-value	Adj p-value	Log2 fold-change	p-value	Adj p-value	Log2 fold-change	p-value	Adj p-value	Log2 fold-change	p-value	Adj p-value	KLHL KO 1.5 month, rep 1	KLHL KO 1.5 month, rep 2	KLHL KO 1.5 month, rep 3	KLHL KO 1.5 month, rep 4	KLHL KO 1.5 month, rep 2	KLHL KO 1.5 month, rep 3	KLHL KO 1.5 month, rep 4	Wild Type 1.5 month, rep 1	Wild Type 1.5 month, rep 2	Wild Type 1.5 month, rep 3	Wild Type 1.5 month, rep 4	Wild Type 4 month, rep 1	Wild Type 4 month, rep 2	Wild Type 4 month, rep 3	Wild Type 4 month, rep 4
A0A097_K16k_1_0_15_16	A0A097	A0A0R4IPR9|A0A097	tmsb1	K16k	AEVQNFDKk	1	-0.161683	0.609764	0.769096	-0.289717	0.365341	0.702707	0.596503	0.0149166	0.0550646	0.0930124	0.691654	0.854595	0.9196	0.1874	0.1948	-0.5308	-0.2051	0.1181	-0.491	0.4376	0.4306	0.1951	NA	0.4466	0.2564	-0.3131	-0.0017
A0A097_K32k_1_1_32_32	A0A097	A0A097	tmsb1	K32k	NVLPTkEDIEQEK	0	-0.1469	0.633284	0.787306	-0.0992167	0.764908	0.930767	0.596503	0.0149166	0.0550646	0.0930124	0.691654	0.854595	-0.6864	-0.4671	-0.951	-1.0196	0.4512	0.3225	-0.1268	-0.0143	-0.5565	-0.7035	-1.2622	0.9651	0.5451	-0.1287	-0.1221
A0A097_K40k_1_0_39_40	A0A097	A0A097	tmsb1	K40k	EDIEQEKk	1	-0.9817	0.0757782	0.240015	0.368467	0.454252	0.765363	0.596503	0.0149166	0.0550646	0.0930124	0.691654	0.854595	-0.4889	-0.8686	-1.3195	0.5786	0.3463	-0.2237	0.2872	0.8367	0.0775	NA	NA	NA	-1.0267	0.1771	0.154
A0A0A0MPG9_K921k_1_1_921_921	A0A0A0MPG9	A0A0A0MPG9	A0A0A0MPG9_K921k_1_1_921_921	K921k	VNSAHkGPDETLR	0	-0.00606667	0.981584	0.991565	-0.357183	0.1623	0.497462	-0.549297	0.0736337	0.164085	-0.286199	0.364697	0.612635	0.6344	0.2509	0.5097	NA	-0.0668	-0.2758	-0.4468	0.5528	0.3425	0.5179	NA	0.5175	-0.3776	0.0384	0.1979
A0A0A0MPR3_K174k_1_1_174_174	A0A0A0MPR3	A0A0A0MPM8|A0A2R8QLP4|A0A0R4IE08|A0A2R8QIT3|A0A2R8QL81|A0A0R4ISN2|A0A2R8QT21|A0A0R4IFV6|A0A0A0MPV2|A0A2R8Q908|A0A0G2KV54|F1R8Z6|A0A0R4IJJ3|A0A2R8Q7B7|A0A0R4IBE1|E9QJG9|F1QW25|A0A0H2UKS5|A0A2R8Q1C8|E7EYZ8|F1R906|A0A2R8QAH6|E9QIY5|A0A0R4IM74|A0A0R4IJV0|A0A0R4IG29|A0A0R4IPW3|A0A2R8QRN8|A0A2R8QQI4|A0A0R4IE62|H0WEA7|A0A2R8RK90|F1QC83|A0A2R8QGN8|A0A0A0MPS0|A0A0R4IFM5|A0A2R8QFV8|A0A0R4I9L8|A0A0R4IAQ6|A0…	A0A0A0MPR3_K174k_1_1_174_174	K174k	TVLTkGIAGIGK	0	-0.481175	0.126355	0.3133	0.145108	0.657857	0.887874	0.289558	0.0698291	0.158616	0.224994	0.178611	0.412999	-0.9097	0.0579	-0.5409	-0.3744	0.0461	0.851	-0.3996	0.2151	-0.1989	-0.1978	0.3392	0.5403	0.0298	-0.3503	-0.1369
A0A0A0MPR3_K417k_1_1_417_417	A0A0A0MPR3	A0A2R8QF99|A0A0G2KN74|A0A2R8QN13|A0A0G2KD52|A0A2R8QB35|A0A2R8QE06|A0A2R8QLP4|A0A0R4IE08|A0A2R8QL81|H2ZRH4|A0A2R8QT21|F1QW25|A0A0R4IJJ3|A0A0R4IBE1|E9QJG9|A0A2R8Q908|A0A0H2UKS5|A0A2R8Q1C8|E7EYZ8|A0A0G2KV54|A0A2R8QQI4|A0A0R4IJV0|A0A0R4IG29|A0A0R4IFM5|A0A2R8Q6K3|A0A0R4I9L8|A0A0R4IAQ6|A0A0R4IPW3|A0A2R8QRN8|F1R906|A0A2R8QAH6|E9QIY5|E7FCN0|F1QC83|A0A2R8QGN8|F1R2P3|A0A0R4IVV9|A0A2R8RT22|A0A0R4IG99|A0A0R4…	A0A0A0MPR3_K417k_1_1_417_417	K417k	QkYEERDPEK	0	-0.179225	0.619081	0.775326	-0.0249167	0.937236	0.989668	0.289558	0.0698291	0.158616	0.224994	0.178611	0.412999	-0.2738	-0.1883	-0.1552	-0.2984	-0.0025	0.2936	-0.6342	0.3609	-0.4603	NA	NA	0.4626	0.0895	-0.5999	-0.31
A0A0A0MPU2_K602k_1_1_602_602	A0A0A0MPU2	F1QX95|A0A0A0MPU2|A0A2R8QJD6	obsl1b	K602k	ICSVNkYGR	0	0.57645	0.013347	0.089645	0.613375	0.0145191	0.150654	0.697403	0.000172971	0.00348249	0.498083	0.00437196	0.0431145	0.453	0.6892	0.4647	0.6881	0.1836	0.2956	0.7727	0.1632	0.0767	0.0632	-0.3139	-0.3777	-0.2907	0.1637	-0.2796
A0A0G2KCW6_K204k_1_1_204_204	A0A0G2KCW6	A0A0G2KCW6	ddb1	K204k	EFNkGPWK	0	0.0145917	0.94684	0.976657	-0.176183	0.426135	0.744626	0.106144	0.442512	0.573284	-0.0063334	0.965756	0.985591	-0.5304	-0.5539	-0.3426	-0.737	0.2902	0.1368	-0.1253	-0.435	-0.5585	-0.6732	NA	0.4688	0.4411	-0.1002	0.2973
A0A0G2KCW6_K70k_1_1_70_70	A0A0G2KCW6	A0A0G2KCW6	ddb1	K70k	IAVMELFRPkGESK	0	-0.0881	0.73622	0.860611	-0.0810167	0.774149	0.934043	0.106144	0.442512	0.573284	-0.0063334	0.965756	0.985591	-0.2524	-0.1791	0.1302	0.2942	0.3419	0.2404	-0.1646	0.4869	0.3148	0.165	-0.6214	0.4609	0.4371	-0.036	0.019
A0A0G2KCW6_K723k_1_1_723_723	A0A0G2KCW6	A0A0G2KCW6	ddb1	K723k	TVPLYESPkR	0	-0.3748	0.213936	0.42232	-0.416725	0.169727	0.505646	0.106144	0.442512	0.573284	-0.0063334	0.965756	0.985591	0.7227	-0.2765	0.3093	-0.2203	0.1459	-0.5377	-0.3009	0.6338	0.3971	0.4949	NA	0.1626	0.6721	-0.0792	-0.0122
A0A0G2KH95_K176k_1_1_176_176	A0A0G2KH95	A0A0G2KH95	psmd2	K176k	AQQEVLLkLVK	0	1.85627	0.000374356	0.0113944	0.0941417	0.789091	0.940882	0.669911	4.41562e-06	0.000451675	0.439569	0.000514225	0.0117715	1.998	1.0512	1.0287	1.367	-1.0958	-0.3802	-1.2838	-0.9194	-0.0707	NA	NA	-1.1597	-0.5738	-1.5263	-0.7965
A0A0G2KH95_K282k_1_1_282_282	A0A0G2KH95	A0A0G2KH95	psmd2	K282k	DIVIQkQMAFMLGR	0	1.53827	0.0387107	0.165556	1.12018	0.147548	0.475055	0.669911	4.41562e-06	0.000451675	0.439569	0.000514225	0.0117715	0.4885	-0.2104	0.3703	0.8424	-0.1322	1.1418	1.0713	-1.6064	-2.4632	-0.221	-0.3717	-2.8875	0.2661	0.2264	0.6888
A0A0G2KH95_K56k_1_1_56_56	A0A0G2KH95	A0A0G2KH95	psmd2	K56k	LGEkDTSLYRPALEELRR	0	0.084225	0.841353	0.921481	0.0320833	0.94369	0.989668	0.669911	4.41562e-06	0.000451675	0.439569	0.000514225	0.0117715	0.278	-0.6656	-0.4548	-1.388	0.7277	0.2661	0.6938	-0.1487	0.4433	-1.1254	-1.7365	0.4501	0.6797	0.3986	0.5934
A0A0G2KQU1_K347k_1_1_347_347	A0A0G2KQU1	A0A0G2KQU1	snta1	K347k	LGTkQGVETHLFR	0	0.0317	0.902062	0.95416	0.618442	0.0282599	0.212685	0.528136	0.00348701	0.0210615	0.395246	0.0281274	0.137303	-0.2201	0.1878	0.047	0.4345	0.3194	0.893	0.2314	0.2203	0.3725	-0.351	NA	-0.0662	-0.1652	0.0004	-0.3177
A0A0G2KQU1_K6k_1_1_6_6	A0A0G2KQU1	A0A0G2KQU1	snta1	K6k	AAAVkPVK	0	-0.5041	0.0828128	0.251573	0.258642	0.354188	0.697953	0.528136	0.00348701	0.0210615	0.395246	0.0281274	0.137303	-0.3489	-0.4715	-0.1589	0.4577	0.1297	-0.1657	0.137	0.7349	0.4051	-0.0189	NA	0.1197	-0.2388	-0.4773	-0.3035
A0A0G2KS67_K187k_1_1_187_187	A0A0G2KS67	A0A0G2KS67	LOC100536537	K187k	LTPANYkCFNRAPIPFGGTAGTAR	0	NA	NA	NA	NA	NA	NA	0.579069	0.0263471	0.080776	0.110222	0.665675	0.841323	0.1394	0.1249	NA	0.8675	NA	NA	NA	NA	NA	NA	NA	NA	NA	NA	NA
A0A0G2KSV9_K730k_1_1_730_730	A0A0G2KSV9	A0A0G2KSV9	A0A0G2KSV9_K730k_1_1_730_730	K730k	VQQQLMSkK	0	0.129708	0.71591	0.844658	0.417133	0.252123	0.603011	-0.0487377	0.670193	0.76666	0.0430052	0.727586	0.875783	0.4442	0.562	0.3631	1.1334	0.1317	0.5087	-0.5101	0.2986	0.2555	0.9338	NA	-0.6583	-0.0694	0.2776	-1.0447
A0A0G2KUC9_K233k_1_1_233_233	A0A0G2KUC9	A0A0G2KUC9	otud1	K233k	QNkYLHDR	0	1.71322	0.0431684	0.17752	1.78344	0.00483095	0.0769106	-0.862775	0.19852	0.322328	0.345862	0.623318	0.814871	-0.3595	-0.2364	0.0534	1.3782	-0.2383	1.7929	0.6527	NA	-1.5043	NA	NA	-0.3408	-1.0593	-1.6391	-1.1515
A0A0G2KXI9_K119k_1_0_119_122	A0A0G2KXI9	A0A0G2KXI9	dnm2b	K119k	EVEEYkNFKPDDPARK	1	-0.216642	0.38533	0.59499	-0.119942	0.627515	0.873402	-0.368394	0.0426496	0.11181	-0.273884	0.14571	0.368842	0.0846	-0.0012	0.6323	0.564	-0.1531	-0.2048	-0.0269	0.5662	0.1001	0.9434	NA	-0.0233	0.0302	0.0327	-0.0729
A0A0G2KXI9_K197k_1_1_197_197	A0A0G2KXI9	A0A0G2KXI9	dnm2b	K197k	EISYAIkNIHGVR	0	0.22845	0.528286	0.71279	-0.152508	0.695506	0.900378	-0.368394	0.0426496	0.11181	-0.273884	0.14571	0.368842	-0.0175	0.4872	0.2959	0.2266	0.332	0.1807	0.4724	-0.9605	-0.3186	0.1492	1.2083	0.6352	0.8905	0.0666	0.3312
A0A0G2L009_K680k_1_1_680_680	A0A0G2L009	A0A0G2L009	dync1h1	K680k	GWENHVEGLkLK	0	-0.0004	0.998624	0.998876	0.392775	0.131633	0.451931	0.25085	0.0570025	0.137456	-0.0644617	0.627217	0.818014	0.7295	0.7896	0.1474	0.2056	0.1593	0.2382	0.1524	0.6467	0.6413	0.1882	0.3975	0.2066	-0.1107	-0.3147	-0.6191
A0A0G2L1F5_K2085k_1_1_2085_2085	A0A0G2L1F5	A0A0G2L1F5	sptbn1	K2085k	GkGSQSATLPTK	0	-0.54265	0.0641508	0.223006	0.518175	0.0976542	0.393939	0.492707	0.00315298	0.0198572	0.252917	0.108988	0.313706	-0.2701	0.2952	0.2764	0.1601	0.5746	-0.212	0.4807	0.3924	0.2777	0.8552	1.1069	0.2176	-0.7447	-0.1315	-0.2897
A0A0G2L1U5_K17k_1_1_17_17	A0A0G2L1U5	A0A0G2L1U5	A0A0G2L1U5_K17k_1_1_17_17	K17k	FSLDLLkQLCQK	0	-0.43885	0.541683	0.721653	0.184933	0.769323	0.931683	-0.498369	0.366328	0.501343	1.20829	0.0559084	0.212285	-1.558	-1.7973	-1.4246	-1.4125	-0.8684	1.7562	-1.6314	NA	-0.9796	-1.2389	NA	-0.9808	-1.0451	-0.007	0.3017
A0A0H2UKD8_K601k_1_1_601_601	A0A0H2UKD8	A5PF48|A0A0H2UKD8	myo1ca	K601k	LMDILMSkEPSYVR	0	0.1805	0.794859	0.894076	-0.704908	0.260893	0.611587	0.254654	0.0511387	0.127485	0.230696	0.0947329	0.286168	0.9181	-1.4768	0.4661	-0.1616	-0.8954	-0.6237	0.1009	NA	-0.4861	-0.002	NA	-0.9342	-0.4242	1.1907	1.0964
A0A0H2UKD8_K902k_1_1_902_902	A0A0H2UKD8	A0A0H2UKD8	myo1ca	K902k	VLQTLGSDNkVK	0	-0.115	0.655387	0.80444	-0.404983	0.158299	0.490819	0.254654	0.0511387	0.127485	0.230696	0.0947329	0.286168	0.412	-0.1164	0.6935	0.2089	0.1381	-0.6748	-0.2296	0.4417	0.407	0.7779	0.0314	0.1846	0.4336	-0.2519	0.2319
A0A0H2UKW6_K291k_1_1_291_291	A0A0H2UKW6	F1QML8|A0A0H2UKS3|R4GEY4|A0A0H2UKW6	akap8l	K291k	QTLSAGDEPESkMGK	0	-0.3032	0.470747	0.671574	-0.011475	0.967769	0.991969	0.399358	0.00760594	0.035383	0.445163	0.00626739	0.0538503	-0.2275	-0.09	-0.1654	0.2501	-0.1158	0.2553	-0.4413	NA	0.245	NA	NA	-0.4516	0.4226	0.0649	-0.3924
A0A0H2UKW6_K352k_1_1_352_352	A0A0H2UKW6	A0A0H2UKS3|A0A0H2UKW6	akap8l	K352k	QNTPTLAkIR	0	0.155275	0.547261	0.724553	-0.0576583	0.835195	0.954248	0.399358	0.00760594	0.035383	0.445163	0.00626739	0.0538503	0.4499	0.4283	0.9063	0.8907	0.0091	-0.0924	-0.0905	0.5099	0.0146	0.5918	0.9378	-0.5622	0.262	0.3957	-0.0966
A0A0H2UKW6_K514k_1_1_514_514	A0A0H2UKW6	A0A0H2UKW6	akap8l	K514k	SILNHkVIGK	0	-0.7713	0.0681413	0.228344	0.281108	0.517365	0.804747	0.399358	0.00760594	0.035383	0.445163	0.00626739	0.0538503	-0.7988	-0.0173	0.2491	0.2532	0.5613	0.517	0.1929	-0.0955	-0.1343	1.5572	1.444	0.7518	-0.0319	-0.0605	-0.0889
A0A0H2UKW6_K518k_1_1_518_518	A0A0H2UKW6	A0A0H2UKW6	akap8l	K518k	VIGkKLER	0	-0.912625	0.0219795	0.120098	0.887067	0.143662	0.469759	0.399358	0.00760594	0.035383	0.445163	0.00626739	0.0538503	0.5715	1.1436	1.5292	0.7321	-2.1148	-1.5144	-1.4364	1.2668	1.4057	2.648	2.3064	-2.5756	NA	NA	NA
A0A0N4STT5_K107k_1_1_107_107	A0A0N4STT5	A0A2R8QK05|A0A0G2L365|A0A2R8Q9I2|A0A2R8QGS1|A0A2R8Q9M0|A0A0N4STT5|A0A0G2L354|A0A2R8Q7G9|A0A0G2L6C1|A0A2R8QHZ3|F1QE01|A0A2R8Q8V2|A0A0N4SU68|A0A2R8Q9D2|F1QZW1|A0A0R4INI3	A0A0N4STT5_K107k_1_1_107_107	K107k	IEDMAMFTFLHEPAVLFNLkER	0	NA	NA	NA	-1.44043	0.167164	0.50233	-0.251505	0.172097	0.294268	0.184932	0.34304	0.594242	0.5202	NA	-0.8387	NA	NA	NA	-1.5306	NA	NA	NA	NA	NA	-1.495	0.777	0.4475
A0A0N4STT5_K1281k_1_1_1281_1281	A0A0N4STT5	A0A0G2L6C1|A0A2R8Q8V2|A0A0N4STT5|A0A2R8Q7G9|A0A0R4INI3|B6IDE1	A0A0N4STT5_K1281k_1_1_1281_1281	K1281k	TINDFTMQkAK	0	0.20365	0.350981	0.566354	0.0503833	0.828471	0.950927	-0.251505	0.172097	0.294268	0.184932	0.34304	0.594242	0.4423	0.0724	0.379	0.497	0.3546	0.1704	-0.2144	0.0988	0.4592	-0.0959	0.114	0.4388	-0.0485	-0.0848	-0.0929
A0A0N4STT5_K1283k_1_1_1283_1283	A0A0N4STT5	A0A2R8Q4Q8|A0A0G2L6C1|A0A2R8QHZ3|A0A2R8Q8V2|A0A2R8Q9I2|A0A2R8QGS1|A0A0N4STT5|A0A0G2L354|A0A2R8Q7G9|A0A0N4SU68|A0A2R8Q9D2|A0A0R4INI3|B6IDE1	A0A0N4STT5_K1283k_1_1_1283_1283	K1283k	AkLQTENGELSR	0	1.64688	0.00101992	0.0204813	0.700783	0.0634331	0.320906	-0.251505	0.172097	0.294268	0.184932	0.34304	0.594242	0.0256	0.4589	0.9189	0.9789	0.3681	0.0524	0.7904	NA	-1.6928	-0.4098	NA	-0.3379	-0.5381	-0.4494	0.1368
A0A0N4STT5_K1309k_1_1_1309_1309	A0A0N4STT5	A0A2R8QGS1|A0A0N4STT5|A0A2R8Q7G9|A0A0N4SU68|A0A0R4INI3|B6IDE1	A0A0N4STT5_K1309k_1_1_1309_1309	K1309k	GkQSYTQQIEDLK	0	0.8343	0.0280717	0.138988	0.614792	0.118065	0.426398	1.32354	0.0403904	0.107795	0.0217449	0.972867	0.987506	0.3813	0.4005	0.1603	0.4937	0.8855	0.6357	-0.0285	-0.0132	-0.01	-0.1565	-1.7217	0.3094	-0.2842	-0.1852	-0.3089
A0A0N4STT5_K1367k_1_1_1367_1367	A0A0N4STT5	A0A0G2L365|A0A2R8Q9I2|A0A2R8QGS1|A0A2R8Q9M0|A0A0N4STT5|A0A0G2L354|A0A0N4SU68|A0A2R8Q9D2|A0A2R8Q4Q8|A0A0G2L6C1|A0A2R8QHZ3|A0A2R8QK05|B6IDE1	A0A0N4STT5_K1367k_1_1_1367_1367	K1367k	SLSkANSEVAQWR	0	0.462825	0.261071	0.47363	0.5647	0.206845	0.552089	-0.251505	0.172097	0.294268	0.184932	0.34304	0.594242	-0.3815	0.6434	0.5918	1.2279	-0.0852	0.4994	0.8212	-0.0551	-0.2267	0.5613	-0.0492	-1.328	0.3506	0.0254	0.3404
A0A0N4STT5_K1414k_1_1_1414_1414	A0A0N4STT5	A0A0N4STT5|A0A0G2L354|A0A0N4SU68|A0A2R8Q9D2|B6IDE1	A0A0N4STT5_K1414k_1_1_1414_1414	K1414k	LQDAEEAVEAVNAkCSSLEK	0	0.0927083	0.831322	0.916802	-0.108925	0.802442	0.943942	1.32354	0.0403904	0.107795	0.0217449	0.972867	0.987506	0.1236	-0.4165	0.6966	0.1046	-0.5492	0.1835	0.1077	-0.4414	0.158	0.3865	NA	-1.2025	-0.0522	0.7919	0.5545
A0A0N4STT5_K1420k_1_1_1420_1420	A0A0N4STT5	A0A2R8Q4Q8|A0A2R8QK05|A0A0G2L365|B8JLS3|A0A2R8Q9I2|A0A2R8Q9D2|F1QZW1|A0A0R4INI3|B6IDE1|A0A2R8QGS1|A0A2R8Q9M0|E7FD18|R4GDZ5|A0A0N4STT5|A0A0G2L354|A0A2R8Q7G9|A0A0N4SU68|F1QSE1	A0A0N4STT5_K1420k_1_1_1420_1420	K1420k	CSSLEkTK	0	1.429	0.0541151	0.202343	1.49751	0.0448441	0.265518	1.32354	0.0403904	0.107795	0.0217449	0.972867	0.987506	0.6305	0.6226	0.7837	0.764	0.7334	-0.3695	0.7315	0.215	-0.4154	NA	-1.986	-3.2699	-1.2199	-0.0169	-0.0228
A0A0N4STT5_K1448k_1_1_1448_1448	A0A0N4STT5	A0A2R8QGS1|A0A2R8Q9M0|A0A0N4STT5|A0A0G2L354|A0A2R8Q8V2|A0A2R8QK05|A0A0G2L365|A0A2R8Q9I2|A0A2R8Q7G9|A0A0N4SU68|A0A2R8Q9D2|F1QZW1|A0A0R4INI3|B6IDE1	A0A0N4STT5_K1448k_1_1_1448_1448	K1448k	SNAAAAALDkK	0	-0.237833	0.562912	0.737378	-0.257242	0.531914	0.813789	1.32354	0.0403904	0.107795	0.0217449	0.972867	0.987506	-0.0268	0.0539	-0.0426	-0.5749	0.0706	-0.4253	-0.4831	0.7277	0.7461	-1.2031	NA	0.259	0.0134	0.0453	-0.4058
A0A0N4STT5_K1487k_1_1_1487_1487	A0A0N4STT5	A0A2R8Q4Q8|A0A2R8Q9I2|A0A2R8QGS1|A0A2R8Q9M0|A0A0N4STT5|A0A2R8Q7G9|A0A0N4SU68|E9QF07|A0A2R8Q9D2|A0A2R8Q8V2|A0A2R8QK05|A0A0G2L365|B8JLS3|A0A0R4INI3|B6IDE1|F1QSE1	A0A0N4STT5_K1487k_1_1_1487_1487	K1487k	SLSTELFkLK	0	0.752875	0.0114108	0.0819257	0.880292	0.00702814	0.0950386	1.32354	0.0403904	0.107795	0.0217449	0.972867	0.987506	0.551	0.9709	0.9962	0.9646	0.5674	0.4522	0.2919	0.098	-0.4083	0.1115	0.67	-1.0571	-0.4737	-0.0725	-0.1692
A0A0N4STT5_K1489k_1_1_1489_1489	A0A0N4STT5	A0A2R8QGS1|A0A2R8Q9M0|A0A0N4STT5|A0A0N4SU68	A0A0N4STT5_K1489k_1_1_1489_1489	K1489k	LkNSYEESLDHLESMKR	0	0.166975	0.545241	0.723364	0.427542	0.1629	0.497638	1.32354	0.0403904	0.107795	0.0217449	0.972867	0.987506	0.2018	0.5374	0.2242	0.7098	0.6296	0.0765	0.2088	0.8811	0.4302	0.1712	-0.4772	-0.3726	-0.1298	0.1923	-0.1802
A0A0N4STT5_K1503k_1_1_1503_1503	A0A0N4STT5	A0A2R8Q4Q8|A0A0G2L6C1|A0A2R8QHZ3|A0A2R8QK05|A0A0G2L365|A0A2R8Q9I2|A0A2R8QGS1|A0A2R8Q9M0|A0A0N4STT5|A0A0N4SU68|A0A2R8Q9D2|B6IDE1	A0A0N4STT5_K1503k_1_1_1503_1503	K1503k	NSYEESLDHLESMkR	0	-0.007225	0.985359	0.992527	-0.408367	0.344316	0.687693	-0.251505	0.172097	0.294268	0.184932	0.34304	0.594242	-0.0914	0.7756	-0.0507	0.0671	0.236	-0.3468	-0.355	0.1344	0.5381	1.2197	-1.1627	0.3757	0.3887	0.0774	0.1706
A0A0N4STT5_K1507k_1_1_1507_1507	A0A0N4STT5	A0A0G2L6C1|A0A0N4STT5	A0A0N4STT5_K1507k_1_1_1507_1507	K1507k	ENkNLQEEISDLTEQLGESGK	0	1.10445	0.00896367	0.0717127	-0.238017	0.467012	0.772884	-0.251505	0.172097	0.294268	0.184932	0.34304	0.594242	0.0576	-0.6409	0.2723	0.1378	-0.1164	-0.0286	0.1145	-1.0246	-1.2709	NA	NA	-0.3901	-0.1258	0.7944	0.6329
A0A0N4STT5_K1525k_1_1_1525_1525	A0A0N4STT5	A0A0G2L6C1|A0A0N4STT5|B6IDE1	A0A0N4STT5_K1525k_1_1_1525_1525	K1525k	NLQEEISDLTEQLGESGkNIHELEK	0	NA	NA	NA	-1.18431	0.00825034	0.104173	-0.251505	0.172097	0.294268	0.184932	0.34304	0.594242	0.2977	NA	-0.4788	-0.4179	-0.8908	-1.531	-0.0707	NA	NA	NA	NA	0.2959	-0.1191	0.4426	0.7945
A0A0N4STT5_K1561k_1_1_1561_1561	A0A0N4STT5	A0A0G2L6C1|A0A0N4STT5|B6IDE1	A0A0N4STT5_K1561k_1_1_1561_1561	K1561k	QEIQTALEEAEGSLEHEEGkILR	0	0.611675	0.386051	0.595531	-0.339183	0.582394	0.847145	-0.251505	0.172097	0.294268	0.184932	0.34304	0.594242	0.5597	-0.8632	0.5749	-0.8227	-0.1417	-0.4819	-0.1946	-0.9403	NA	NA	-0.5587	-1.6429	-0.3159	1.0233	1.2013
A0A0N4STT5_K1573k_1_1_1573_1573	A0A0N4STT5	A0A2R8Q7G9|A0A0N4SU68|A0A2R8Q9D2|A0A0R4INI3|A0A2R8Q8V2|A0A2R8Q9I2|A0A2R8QGS1|A0A0N4STT5|B6IDE1	A0A0N4STT5_K1573k_1_1_1573_1573	K1573k	AQLEFNQVkADIERK	0	0.700675	0.00469274	0.0510392	0.729358	0.00600711	0.0868683	1.32354	0.0403904	0.107795	0.0217449	0.972867	0.987506	0.393	0.4149	-0.2071	0.4915	1.0282	0.6812	0.4885	-0.6962	-0.3658	-0.2516	-0.3968	0.1055	-0.1718	0.1395	-0.0601
A0A0N4STT5_K1591k_1_1_1591_1591	A0A0N4STT5	A0A2R8QK05|A0A0G2L365|A0A2R8Q9M0|A0A0N4STT5	A0A0N4STT5_K1591k_1_1_1591_1591	K1591k	LSEKDEEMEQAkR	0	-0.3551	0.0866348	0.257969	0.06825	0.748796	0.924581	0.47291	0.118407	0.227007	0.863993	0.0143376	0.0914633	0.2245	0.5638	0.3852	0.2808	0.1868	0.4217	0.0899	0.4992	0.6257	0.7831	0.9667	-0.0597	-0.0105	0.4333	0.2951
A0A0N4STT5_K1621k_1_1_1621_1621	A0A0N4STT5	A0A2R8Q4Q8|A0A2R8QM44|A0A0N4STT5|A0A2R8Q7G9|A0A0N4SU68|A0A2R8Q9D2|B8JLS3|A0A2R8Q9I2|A0A2R8QGS1|A0A2R8Q9M0|A0A0G2L6C1|A0A2R8QHZ3|A0A2R8Q8V2|A0A2R8QK05|A0A0G2L365	A0A0N4STT5_K1621k_1_1_1621_1621	K1621k	kMEGDLNEMEIQLSQANR	0	1.45633	0.0197716	0.112831	0.247708	0.687236	0.899436	-0.251505	0.172097	0.294268	0.184932	0.34304	0.594242	0.9433	0.308	1.3675	0.8351	-1.0248	0.3806	0.5096	-1.2255	-0.826	-0.4657	0.1458	-2.2969	0.0061	0.3301	0.7904
A0A0N4STT5_K1645k_1_1_1645_1645	A0A0N4STT5	A0A2R8QHZ3|A0A2R8Q8V2|A0A2R8QK05|A0A0G2L365|A0A2R8Q7G9|A0A0N4SU68|A0A2R8Q9D2|A0A0R4INI3|A0A2R8Q9I2|A0A2R8QGS1|A0A2R8Q9M0|A0A0N4STT5|B6IDE1	A0A0N4STT5_K1645k_1_1_1645_1645	K1645k	QASEAQkQLK	0	0.73475	0.0137381	0.0916489	0.868333	0.00805711	0.103289	0.0445521	0.824543	0.880791	-0.640635	0.0101402	0.0739003	0.0375	0.1329	0.5557	0.6618	0.6666	0.4627	0.6276	-0.5308	-0.1791	-0.5413	-0.2999	-1.1383	-0.0266	0.0036	0.0305
A0A0N4STT5_K1648k_1_1_1648_1648	A0A0N4STT5	A0A2R8Q4Q8|A0A0G2L6C1|A0A2R8QHZ3|A0A2R8Q8V2|A0A2R8Q9I2|A0A2R8QGS1|A0A0N4STT5|A0A2R8Q7G9|A0A0N4SU68|A0A2R8Q9D2	A0A0N4STT5_K1648k_1_1_1648_1648	K1648k	QLkGLHGHLK	0	0.0145	0.948369	0.976657	0.6026	0.0228736	0.191009	-0.251505	0.172097	0.294268	0.184932	0.34304	0.594242	0.5663	0.1932	0.3856	0.8929	0.2229	0.5462	0.4801	0.4692	0.2758	0.5189	0.7161	-0.4146	-0.3258	0.3035	-0.3079
A0A0N4STT5_K1655k_1_1_1655_1655	A0A0N4STT5	A0A0N4SU68|A0A2R8Q9D2|A0A0R4INI3|B6IDE1|A0A2R8Q9I2|A0A2R8QGS1|A0A0N4STT5|A0A2R8Q7G9|A0A2R8Q4Q8|A0A0G2L6C1|A0A2R8QHZ3|A0A2R8Q8V2	A0A0N4STT5_K1655k_1_1_1655_1655	K1655k	GLHGHLkDAQLQLDDALRGNDDLK	0	-0.1245	0.513057	0.701817	0.120475	0.557321	0.829649	-0.251505	0.172097	0.294268	0.184932	0.34304	0.594242	-0.299	-0.0791	-0.525	-0.0586	0.6228	0.4811	0.4663	-0.0436	-0.103	-0.1441	-0.173	0.6643	0.4692	0.3677	0.1105
A0A0N4STT5_K1704k_1_1_1704_1704	A0A0N4STT5	A0A0G2L6C1|A0A2R8QHZ3|A0A2R8Q8V2|A0A2R8QK05|A0A2R8Q4J2|A0A0N4STT5|A0A2R8Q7G9|A0A0N4SU68|A0A0G2L365|A0A2R8Q9I2|A0A2R8QGS1|A0A2R8Q9M0|A0A2R8Q9D2|A0A0R4INI3|B6IDE1	A0A0N4STT5_K1704k_1_1_1704_1704	K1704k	kLAEQELMDVSER	0	0.7674	0.182934	0.386172	0.411067	0.499271	0.794717	-0.251505	0.172097	0.294268	0.184932	0.34304	0.594242	-0.2655	-0.4729	-0.0364	0.3835	0.5745	0.4932	0.6695	-0.9826	-0.1579	0.7135	-3.0339	-0.0436	0.2635	-0.099	0.5511
A0A0N4STT5_K1731k_1_1_1731_1731	A0A0N4STT5	A0A2R8QM44|F1QSE1|A0A2R8Q4Q8|A0A0G2L6C1|A0A2R8QHZ3|A0A2R8Q8V2|A0A2R8QK05|A0A0G2L365|A0A0N4STT5|A0A2R8Q7G9|A0A0N4SU68|A0A2R8Q9D2|F1QZW1|A0A0R4INI3|B6IDE1	A0A0N4STT5_K1731k_1_1_1731_1731	K1731k	VQLLHSQNTSLLNQkK	0	0.09735	0.725365	0.852002	-0.126742	0.672271	0.893803	-0.251505	0.172097	0.294268	0.184932	0.34304	0.594242	-0.1663	-0.0145	0.295	0.3893	0.0659	0.3948	0.4526	-0.1422	-0.6252	0.3198	0.5617	-0.0238	0.3055	0.6511	0.7919
A0A0N4STT5_K1788k_1_1_1788_1788	A0A0N4STT5	A0A2R8QHZ3|A0A2R8Q8V2|A0A2R8QK05|A0A0G2L365|A0A2R8Q7G9|A0A0N4SU68|A0A2R8Q9D2|F1QZW1|B8JLS3|A0A2R8Q9I2|A0A2R8QGS1|A0A2R8Q9M0|E7FD18|R4GDZ5|A0A2R8Q4J2|A0A0N4STT5	A0A0N4STT5_K1788k_1_1_1788_1788	K1788k	kNMEQTIK	0	0.547725	0.269772	0.482249	0.26835	0.582391	0.847145	0.0445521	0.824543	0.880791	-0.640635	0.0101402	0.0739003	0.2457	-0.1213	0.7688	0.1741	0.4335	-0.4137	0.1224	-0.0189	0.778	-1.6018	NA	-0.7582	-0.6136	-0.0596	0.5476
A0A0N4STT5_K1795k_1_1_1795_1795	A0A0N4STT5	A0A0N4STT5|A0A2R8Q7G9|A0A0N4SU68|A0A2R8Q9D2|F1QZW1|A0A0R4INI3|B6IDE1|F1QSE1	A0A0N4STT5_K1795k_1_1_1795_1795	K1795k	NMEQTIkDLQHR	0	-0.4151	0.262256	0.475063	0.0234167	0.948398	0.989668	1.32354	0.0403904	0.107795	0.0217449	0.972867	0.987506	-0.2124	0.5025	-1.1755	-0.4374	0.7903	0.338	-0.1453	0.3662	0.3247	-0.4377	NA	0.4809	0.1718	0.331	0.2333
A0A0N4STT5_K1810k_1_1_1810_1810	A0A0N4STT5	A0A2R8Q4J2|A0A0N4STT5|A0A2R8Q7G9|A0A0N4SU68|A0A2R8Q9D2|F1QZW1|A0A0R4INI3|B6IDE1|A0A0G2L365|A0A2R8Q9I2|A0A2R8QGS1|A0A2R8Q9M0|A0A0G2L6C1|A0A2R8QHZ3|A0A2R8Q8V2|A0A2R8QK05|F1QSE1	A0A0N4STT5_K1810k_1_1_1810_1810	K1810k	DLQHRLDEAEQIAMkGGK	0	0.838875	0.0197939	0.112831	1.52893	0.000513268	0.020375	-0.251505	0.172097	0.294268	0.184932	0.34304	0.594242	0.8969	1.2423	1.1438	1.7144	-0.0786	0.2973	0.4752	0.6701	-0.0162	0.3388	0.6492	-2.0511	-1.7908	-0.6726	-0.676
A0A0N4STT5_K1818k_1_1_1818_1818	A0A0N4STT5	A0A0G2L6C1|A0A2R8QHZ3|A0A2R8Q4J2|A0A0N4STT5	A0A0N4STT5_K1818k_1_1_1818_1818	K1818k	QVQkLESR	0	1.84802	0.0032851	0.0402348	0.562367	0.341361	0.685058	-0.251505	0.172097	0.294268	0.184932	0.34304	0.594242	-0.0017	0.5407	0.8512	1.1462	0.3511	0.1355	0.8975	-0.0408	-0.3253	-1.4238	-3.0658	-0.9105	-0.1932	0.4398	0.2599
A0A0N4STT5_K1842k_1_1_1842_1842	A0A0N4STT5	A0A0G2L6C1|A0A0N4STT5|B6IDE1	A0A0N4STT5_K1842k_1_1_1842_1842	K1842k	ASDSVkGVR	0	1.0688	0.000619679	0.0148523	1.05503	0.00131564	0.0367677	-0.251505	0.172097	0.294268	0.184932	0.34304	0.594242	0.125	0.5752	0.9529	1.2341	0.5585	0.4416	0.4174	-0.1599	-0.6477	-0.4988	-0.0816	-0.5872	-0.7901	-0.1968	-0.756
A0A0N4STT5_K1852k_1_1_1852_1852	A0A0N4STT5	E7F5L1|A0A2R8Q8V2|A0A2R8QK05|A0A0G2L365|A0A0N4SU68|E9QF07|A0A2R8Q9D2|F1QZW1|A0A2R8Q4Q8|A0A2R8QM44|A0A0G2L6C1|A0A2R8QHZ3|A0A2R8Q9I2|A0A2R8QGS1|A0A2R8Q9M0|E7FD18|R4GDZ5|A0A2R8Q4J2|A0A0N4STT5|A0A2R8Q7G9|A0A0R4INI3|B6IDE1|F1QSE1	A0A0N4STT5_K1852k_1_1_1852_1852	K1852k	IkELTYQTEEDRK	0	0.918925	0.00222844	0.0326507	0.566858	0.0530148	0.291651	-0.251505	0.172097	0.294268	0.184932	0.34304	0.594242	0.2631	0.4674	0.8562	1.2166	0.3016	0.4152	0.423	0.2251	-0.2048	-0.0657	-0.827	-0.3353	-0.193	-0.1227	-0.0967
A0A0N4STT5_K1863k_1_1_1863_1863	A0A0N4STT5	A0A2R8QM44|E7FD18|R4GDZ5|F1QSE1|A0A2R8Q4Q8|A0A0G2L6C1|A0A2R8Q9I2|A0A2R8QGS1|A0A2R8Q9M0|A0A2R8Q4J2|A0A0N4STT5|A0A2R8Q7G9|A0A0N4SU68|A0A2R8Q9D2	A0A0N4STT5_K1863k_1_1_1863_1863	K1863k	ELTYQTEEDRkNLAR	0	0.199625	0.602433	0.764029	0.46755	0.266569	0.617039	-0.251505	0.172097	0.294268	0.184932	0.34304	0.594242	0.2297	1.2426	0.2285	0.799	0.1984	-0.4216	0.4737	0.6488	0.9417	0.9915	-0.8807	-0.3104	-0.5476	-0.398	-0.2802
A0A0N4STT5_K1899k_1_1_1899_1899	A0A0N4STT5	A0A0G2L6C1|A0A0N4STT5|B6IDE1	A0A0N4STT5_K1899k_1_1_1899_1899	K1899k	RTAEEAEEQANSNLGkFR	0	0.443275	0.0984644	0.27623	0.171633	0.537278	0.816631	-0.251505	0.172097	0.294268	0.184932	0.34304	0.594242	0.3704	0.1883	0.9244	0.5564	0.4488	0.004	-0.1362	0.3786	0.3786	0.0484	-0.5392	-0.1404	-0.2555	-0.1276	0.2591
A0A0N4STT5_K1923k_1_1_1923_1923	A0A0N4STT5	F1QZW1|A0A2R8Q4Q8|A0A2R8QM44|A0A0G2L6C1|A0A2R8QHZ3|A0A2R8QK05|A0A0G2L365|A0A0N4STT5|A0A0N4SU68|A0A2R8Q9D2|B6IDE1	A0A0N4STT5_K1923k_1_1_1923_1923	K1923k	LQHELDEAEERADIAESQVNkLR	0	0.001775	0.995324	0.996414	-0.17905	0.506331	0.798248	-0.251505	0.172097	0.294268	0.184932	0.34304	0.594242	-0.4053	0.1955	0.0907	0.4806	0.3052	-0.1223	-0.1508	0.1671	0.0101	NA	NA	0.3741	-0.2137	0.137	0.4616
A0A0N4STT5_K214k_1_1_214_214	A0A0N4STT5	A0A2R8Q9I2|A0A2R8QGS1|A0A2R8Q9M0|A0A0N4STT5|A0A0G2L6C1|A0A2R8QHZ3|A0A2R8QK05|A0A0G2L365|A0A0G2L354|A0A0N4SU68|A0A2R8Q9D2|B6IDE1	A0A0N4STT5_K214k_1_1_214_214	K214k	kGTLEDQIIQCNPALEAFGNAK	0	0.46055	0.558237	0.733969	0.429167	0.42737	0.745852	-0.251505	0.172097	0.294268	0.184932	0.34304	0.594242	0.5925	0.2851	0.5854	0.2052	0.1547	-0.4494	-0.1131	NA	-0.0435	NA	NA	-1.5509	-1.6595	0.8643	0.0857
A0A0N4STT5_K235k_1_1_235_235	A0A0N4STT5	A0A2R8QGS1|A0A2R8Q9M0|A0A0N4STT5|A0A0G2L354|A0A0N4SU68|A0A2R8Q9D2|B6IDE1	A0A0N4STT5_K235k_1_1_235_235	K235k	KGTLEDQIIQCNPALEAFGNAkTIR	0	-1.06282	0.0589088	0.21205	0.696567	0.147992	0.475755	1.32354	0.0403904	0.107795	0.0217449	0.972867	0.987506	-1.4381	-0.6439	-1.1665	-1.1382	1.1548	0.4247	0.1505	-0.4639	0.3962	NA	NA	-1.4992	0.6127	0.1626	0.2443
A0A0N4STT5_K279k_1_1_279_279	A0A0N4STT5	A0A0G2L6C1|A0A2R8Q8V2|A0A0N4STT5|A0A2R8Q7G9|A0A0R4INI3|B6IDE1	A0A0N4STT5_K279k_1_1_279_279	K279k	VTYQLkAER	0	0.793325	0.0620932	0.217767	0.074475	0.863309	0.964293	-0.251505	0.172097	0.294268	0.184932	0.34304	0.594242	-0.2424	-0.3826	-0.5214	0.2161	0.7684	0.6752	0.0672	-0.4732	-0.4346	-1.0592	-2.1366	0.7242	1.2634	-0.299	0.0279
A0A0N4STT5_K352k_1_1_352_352	A0A0N4STT5	A0A2R8Q4Q8|A0A0G2L6C1|A0A2R8Q9I2|A0A2R8QGS1|A0A0N4STT5|A0A0N4SU68|B6IDE1	A0A0N4STT5_K352k_1_1_352_352	K352k	NSIYkLTGAIMHYGNMK	0	0.600625	0.15497	0.353835	0.335075	0.451293	0.763447	-0.251505	0.172097	0.294268	0.184932	0.34304	0.594242	-0.0327	-0.2455	0.2699	0.4967	0.0819	0.8739	0.4434	-1.0369	-0.8968	0.065	-0.0454	-1.2369	0.6987	0.4321	0.6314
A0A0N4STT5_K364k_1_1_364_364	A0A0N4STT5	A0A2R8Q4Q8|A0A2R8QM44|A0A0G2L6C1|B8JLS3|A0A2R8Q9I2|A0A2R8QGS1|A0A0N4STT5	A0A0N4STT5_K364k_1_1_364_364	K364k	LTGAIMHYGNMkFK	0	0.942725	0.00860389	0.0704651	1.78997	8.65097e-05	0.00684243	-0.251505	0.172097	0.294268	0.184932	0.34304	0.594242	-0.5923	0.7957	0.2979	1.1399	0.799	1.3182	0.8593	-0.467	-0.504	-0.4792	-0.6795	-1.1151	-0.5995	-1.048	-0.4286
A0A0N4STT5_K451k_1_1_451_451	A0A0N4STT5	A0A2R8Q8V2|A0A2R8Q9I2|A0A2R8QGS1|A0A0N4STT5|A0A0G2L354|A0A2R8Q7G9|A0A0N4SU68|A0A2R8Q9D2	A0A0N4STT5_K451k_1_1_451_451	K451k	INQSLDTkQPR	0	-1.15043	0.0654849	0.225456	-0.574583	0.249737	0.600629	1.32354	0.0403904	0.107795	0.0217449	0.972867	0.987506	-0.9525	NA	-1.3361	NA	0.5623	-0.0888	-1.2551	0.4361	-0.1471	-0.2706	NA	0.8149	1.1062	-0.6441	-0.0208
A0A0N4STT5_K49k_1_1_49_49	A0A0N4STT5	A0A0G2L6C1|F1QE01|A0A0N4STT5	A0A0N4STT5_K49k_1_1_49_49	K49k	ECFVPDPEVEYVkASVTSR	0	0.275525	0.62954	0.78341	-0.3866	0.360864	0.701476	-0.251505	0.172097	0.294268	0.184932	0.34304	0.594242	0.2334	-0.4557	0.2665	0.0535	-1.2057	-0.1801	0.5375	NA	-0.2511	NA	NA	NA	-0.1757	0.1122	0.375
A0A0N4STT5_K566k_1_1_566_566	A0A0N4STT5	A0A0G2L6C1|A0A0N4STT5|B6IDE1	A0A0N4STT5_K566k_1_1_566_566	K566k	NPNFQkPR	0	-0.11375	0.653264	0.80283	-0.0487583	0.846848	0.956096	-0.251505	0.172097	0.294268	0.184932	0.34304	0.594242	0.4155	0.3497	0.3401	-0.1207	0.0933	-0.3124	0.2229	0.1042	0.6711	0.3044	NA	-0.2046	-0.122	0.4618	0.0649
A0A0N4STT5_K661k_1_1_661_661	A0A0N4STT5	A0A2R8QGS1|A0A2R8Q9M0|E7FD18|R4GDZ5|A0A0N4STT5|A0A0G2L354|A0A2R8Q7G9|A0A0N4SU68|E9QF07|A0A2R8Q9D2|F1QZW1|A0A0R4INI3	A0A0N4STT5_K661k_1_1_661_661	K661k	ENLNkLMTNLR	0	-1.05212	0.00176104	0.0282052	-0.353075	0.257152	0.608636	1.32354	0.0403904	0.107795	0.0217449	0.972867	0.987506	0.0438	-0.1694	-0.2283	-0.3584	0.6063	-0.2649	-0.5265	1.1984	1.1632	0.3451	0.7895	0.6197	0.131	-0.1072	0.522
A0A0N4STT5_K711k_1_1_711_711	A0A0N4STT5	A0A2R8Q4Q8|A0A2R8QM44|A0A2R8QGS1|A0A2R8Q9M0|E7FD18|R4GDZ5|A0A0N4STT5|A0A0G2L354|A0A2R8Q7G9|A0A0N4SU68|E9QF07|A0A2R8Q9D2|F1QZW1|A0A0R4INI3	A0A0N4STT5_K711k_1_1_711_711	K711k	kGFPNR	0	0.14205	0.578601	0.748555	0.301283	0.282415	0.631741	1.32354	0.0403904	0.107795	0.0217449	0.972867	0.987506	0.5962	0.9638	0.779	0.6662	0.2937	0.0671	-0.1393	0.4321	0.9824	0.7608	0.2617	-0.7903	-0.4564	0.2234	0.1135
A0A0N4STT5_K845k_1_1_845_845	A0A0N4STT5	A0A0G2L6C1|A0A2R8Q8V2|A0A0N4STT5|A0A2R8Q7G9|A0A0R4INI3|B6IDE1	A0A0N4STT5_K845k_1_1_845_845	K845k	IKPLLkTAETEK	0	0.201683	0.525164	0.711047	0.237667	0.45527	0.766016	-0.251505	0.172097	0.294268	0.184932	0.34304	0.594242	-0.1868	-0.839	-0.7741	-0.0147	0.8572	0.631	-0.0426	-0.4557	-0.7963	-0.714	NA	-0.105	0.8111	0.3751	-0.1044
A0A0N4STT5_K857k_1_1_857_857	A0A0N4STT5	A0A0G2L6C1|A0A2R8Q8V2|A0A0N4STT5|A0A2R8Q7G9|A0A0R4INI3|B6IDE1	A0A0N4STT5_K857k_1_1_857_857	K857k	EMANMkEEFTK	0	-0.06635	0.742829	0.864812	0.0235417	0.914029	0.9849	-0.251505	0.172097	0.294268	0.184932	0.34304	0.594242	0.4652	-0.0136	0.4763	0.3536	0.1265	0.0517	0.1622	0.306	0.1727	0.2498	0.8184	0.1425	-0.005	0.2525	-0.0303
A0A0N4STT5_K869k_1_1_869_869	A0A0N4STT5	A0A0G2L354|A0A2R8Q7G9|K7DY49|A0A0N4SU68|A0A2R8Q9I2|A0A2R8QGS1|A0A2R8Q9M0|A0A0N4STT5|A0A2R8Q9D2|F1QZW1|A0A0R4INI3|B6IDE1|F1QSE1	A0A0N4STT5_K869k_1_1_869_869	K869k	EAYAkSEAR	0	0.118517	0.71938	0.847741	0.346508	0.301843	0.648885	1.32354	0.0403904	0.107795	0.0217449	0.972867	0.987506	-0.2904	0.6895	0.0333	0.0718	0.9928	0.3535	-0.1189	0.4167	-0.1464	-0.2477	NA	-0.4599	0.2472	0.4095	0.0537
A0A0N4SUC0_K494k_1_1_494_494	A0A0N4SUC0	A0A0N4SUC0	abcc3	K494k	TYQVEQMkYKDDR	0	-1.72855	0.00377534	0.0447163	-0.241417	0.664637	0.8911	1.55665	0.212837	0.339319	-0.810818	0.538333	0.756218	-0.0169	-0.1056	0.5779	0.112	0.6241	-1.5391	-0.6782	1.7684	1.4619	2.403	1.8483	1.414	-0.9445	-0.8296	-0.7985
A0A0R4I9B2_K88k_1_1_88_88	A0A0R4I9B2	Q803D2|A0A0R4I9B2	pafah1b1b	K88k	EEITLGGPVGQkRDPK	0	0.45025	0.169517	0.37139	-0.274758	0.427674	0.746071	-0.275974	0.00628564	0.0310464	-0.216977	0.0338886	0.153821	0.1993	0.2294	-0.2192	0.2731	0.0298	0.0527	-0.4636	0.3202	0.1904	-0.485	-1.344	0.373	0.2981	0.0163	-0.0965
A0A0R4I9Q9_K123k_1_1_123_123	A0A0R4I9Q9	Q1LWS2|A0A0R4I9Q9	hcls1	K123k	GFGGkFGVQK	0	0.039725	0.936202	0.972986	0.09625	0.826086	0.950588	0.0459702	0.723283	0.807013	0.0695949	0.620547	0.812604	-0.0382	-0.2445	0.2969	-0.8439	-0.3459	0.8378	-0.5579	NA	-0.6383	0.144	NA	0.3626	0.3699	-1.0235	-0.182
A0A0R4I9Q9_K197k_1_1_197_197	A0A0R4I9Q9	Q1LWS2|A0A0R4I9Q9	hcls1	K197k	GFGGkYGVEK	0	-0.76	0.00969541	0.0759968	0.721892	0.0199256	0.176967	0.0459702	0.723283	0.807013	0.0695949	0.620547	0.812604	-0.7639	-0.7774	-0.4626	-0.0653	0.7266	0.6681	0.1331	0.3884	-0.0547	0.2559	0.3812	0.0956	0.1712	-0.3199	-0.7974
A0A0R4I9Q9_K86k_1_1_86_86	A0A0R4I9Q9	Q1LWS2|A0A0R4I9Q9	hcls1	K86k	ASYGYGGkFGVEK	0	0.0320333	0.919768	0.965147	0.3513	0.279561	0.628834	0.0459702	0.723283	0.807013	0.0695949	0.620547	0.812604	0.4741	0.1751	0.1959	-0.1783	-0.0497	0.5551	-0.095	-0.5242	0.0862	0.842	NA	0.0545	-0.1176	-0.5946	-0.2003
A0A0R4I9S7_K1196k_1_1_1196_1196	A0A0R4I9S7	X1WCY2|X1WEB8|A0A0R4I9S7	A0A0R4I9S7_K1196k_1_1_1196_1196	K1196k	SkAFNSETDNFK	0	-0.81045	0.00243843	0.0339801	-0.2997	0.232654	0.584703	0.0724808	0.650758	0.752161	0.158033	0.366736	0.614067	-0.3567	0.4963	0.2929	0.2411	-0.0605	-0.5657	-0.1535	1.0511	0.916	0.6883	1.26	0.2119	0.0796	0.0123	-0.1446
A0A0R4IA72_K1028k_1_1_1028_1028	A0A0R4IA72	Q5RGQ4|A0A0R4IA72	A0A0R4IA72_K1028k_1_1_1028_1028	K1028k	QGWTYGIQQDLkNRR	0	0.780975	0.00222099	0.0326507	0.005375	0.981612	0.994251	-0.0411615	0.861428	0.906316	-0.400233	0.133233	0.35098	0.6373	1.2196	0.7952	1.1365	-0.2656	-0.2315	0.0231	0.3916	0.4312	0.0642	-0.2223	-0.3455	-0.2434	0.04	-0.1046
A0A0R4IA72_K1220k_1_1_1220_1220	A0A0R4IA72	Q5RGQ4|A0A0R4IA72|A0A2R8QEE5	A0A0R4IA72_K1220k_1_1_1220_1220	K1220k	MNLGkDASTFK	0	-1.11702	0.00453465	0.0499696	0.422275	0.223147	0.57178	-0.0411615	0.861428	0.906316	-0.400233	0.133233	0.35098	-0.3726	-0.7777	-0.6087	-0.1375	0.4673	-0.4028	0.723	0.3669	0.3848	1.177	NA	-0.0948	0.4346	-0.5251	-0.4538
A0A0R4IA72_K2540k_1_1_2540_2540	A0A0R4IA72	Q5RGQ4|A0A0R4IA72	A0A0R4IA72_K2540k_1_1_2540_2540	K2540k	MPIkLLTNHYEQNWK	0	1.71812	0.0042555	0.0475558	0.0425583	0.939567	0.989668	-0.0411615	0.861428	0.906316	-0.400233	0.133233	0.35098	0.3103	-0.1342	-0.3637	0.2777	-0.4506	0.3353	1.2398	-1.4866	-2.2033	-2.1256	-0.9669	-1.4153	0.9676	1.2883	0.4885
A0A0R4IA72_K2574k_1_1_2574_2574	A0A0R4IA72	Q5RGQ4|A0A0R4IA72	A0A0R4IA72_K2574k_1_1_2574_2574	K2574k	YYCLPTGLGSYGMASEEELHLTkK	0	NA	NA	NA	0.0886417	0.720281	0.909189	-0.0411615	0.861428	0.906316	-0.400233	0.133233	0.35098	-0.6065	NA	-0.7994	-0.9625	0.2975	-0.1422	0.4962	NA	NA	NA	NA	-0.0735	0.1126	0.0796	0.3954
A0A0R4IA72_K2725k_1_1_2725_2725	A0A0R4IA72	Q5RGQ4|A0A0R4IA72	A0A0R4IA72_K2725k_1_1_2725_2725	K2725k	TkEGEAMFQQR	0	-0.196275	0.393952	0.601412	-0.14955	0.545126	0.823847	-0.0411615	0.861428	0.906316	-0.400233	0.133233	0.35098	0.8325	0.8055	0.1143	0.3893	-0.2639	-0.3476	0.037	0.9353	0.5961	1.015	0.3803	0.1393	0.0028	-0.0351	-0.2748
A0A0R4IA72_K3227k_1_1_3227_3227	A0A0R4IA72	Q5RGQ4|A0A0R4IA72	A0A0R4IA72_K3227k_1_1_3227_3227	K3227k	ILNNNLGIENAPWMkR	0	0.220633	0.451428	0.653917	-0.264775	0.368297	0.704744	-0.0411615	0.861428	0.906316	-0.400233	0.133233	0.35098	0.6567	-0.0691	0.1211	-0.1687	-0.0554	0.1905	0.0821	0.2403	-0.1639	-0.3333	NA	0.1085	-0.1747	0.5565	0.8584
A0A0R4IA72_K3366k_1_1_3366_3366	A0A0R4IA72	Q5RGQ4|A0A0R4IA72	A0A0R4IA72_K3366k_1_1_3366_3366	K3366k	REEQNFVVQNEINNLAFLAGDSkSK	0	NA	NA	NA	0.456333	0.192697	0.532319	-0.0411615	0.861428	0.906316	-0.400233	0.133233	0.35098	0.3641	0.0791	-0.2485	-0.0376	-0.0915	0.2284	0.4095	NA	NA	NA	NA	-1.2272	0.0818	0.1075	-0.0589
A0A0R4IA72_K3473k_1_1_3473_3473	A0A0R4IA72	Q5RGQ4|A0A0R4IA72	A0A0R4IA72_K3473k_1_1_3473_3473	K3473k	DIVLkSEGPPDPEQNVER	0	-1.9925	0.00357457	0.0431206	0.129233	0.756434	0.926733	-0.0411615	0.861428	0.906316	-0.400233	0.133233	0.35098	NA	-0.0382	NA	NA	-1.0826	-0.6668	NA	1.7494	1.7103	2.4032	NA	-0.3656	-1.1417	NA	-1.5045
A0A0R4IA72_K4451k_1_1_4451_4451	A0A0R4IA72	Q5RGQ4|A0A0R4IA72	A0A0R4IA72_K4451k_1_1_4451_4451	K4451k	SQkVAAEKPESEPEK	0	0.786325	0.0544572	0.20343	-0.430275	0.270166	0.62193	-0.0411615	0.861428	0.906316	-0.400233	0.133233	0.35098	0.1779	-0.4158	0.0735	0.6881	-0.0922	-0.2263	0.1334	0.0979	-0.6951	-1.369	NA	-0.3428	0.7511	0.8587	0.2073
A0A0R4IA72_K841k_1_1_841_841	A0A0R4IA72	Q5RGQ4|A0A0R4IA72	A0A0R4IA72_K841k_1_1_841_841	K841k	MRVEPVkEYKR	0	-0.269625	0.35491	0.569352	0.331617	0.294188	0.643567	-0.0411615	0.861428	0.906316	-0.400233	0.133233	0.35098	0.319	-0.2352	0.2474	-0.1725	0.2553	-0.0028	1.0332	0.3729	0.7223	-0.0848	0.2268	0.2043	-0.1092	0.633	-0.3403
A0A0R4IA72_K909k_1_1_909_909	A0A0R4IA72	Q5RGQ4|A0A0R4IA72	A0A0R4IA72_K909k_1_1_909_909	K909k	IELGWMYGkVR	0	0.564067	0.0739345	0.238173	-0.707217	0.0217712	0.185121	-0.0411615	0.861428	0.906316	-0.400233	0.133233	0.35098	0.577	NA	0.69	0.2883	-0.6293	-0.8752	0.1423	-0.2029	0.0568	0.0092	NA	0.2159	-0.0956	0.6121	0.2802
A0A0R4IA93_K184k_1_1_184_184	A0A0R4IA93	A0A0R4IA93|A0A0R4IQI9	ckap5	K184k	DEAkLLAVEIYR	0	-1.57165	0.0931191	0.268255	-1.67755	0.190191	0.530459	-0.382403	0.0492769	0.12431	-0.439815	0.0380514	0.166301	-0.9191	0.4164	-1.6662	-0.6805	0.7625	NA	-2.0114	-0.0657	1.7843	NA	NA	1.0531	NA	NA	NA
A0A0R4IAH0_K994k_1_1_994_994	A0A0R4IAH0	F1QRR4|A0A0R4IAH0	hdac4	K994k	VLEVQSkYWR	0	-0.243525	0.321544	0.536687	-0.038775	0.881906	0.970074	-0.22966	0.559566	0.677116	0.499713	0.249315	0.498081	0.3189	-0.0003	0.3999	0.7826	0.3782	0.2378	0.635	0.2386	0.3817	1.1861	0.6688	0.6456	0.4459	0.2684	0.4632
A0A0R4IAH3_K302k_1_1_302_302	A0A0R4IAH3	A0A0R4IAH3	eci2	K302k	ASEVLLFNkK	0	-0.5416	0.403993	0.609765	-0.37635	0.438269	0.754699	0.651163	0.00337626	0.0207081	0.514662	0.0211579	0.11707	NA	1.1449	0.0274	0.4681	0.1433	NA	-1.0383	NA	NA	1.0884	NA	0.6873	-0.1307	-0.5852	-0.256
A0A0R4IAS2_K1635k_1_1_1635_1635	A0A0R4IAS2	A0A0R4IAS2|A0A286YAI4	ppl	K1635k	LQkSLAAMR	0	NA	NA	NA	0.0471833	0.932983	0.988641	0.105089	0.455105	0.585333	-0.637036	0.000855708	0.0155921	NA	NA	NA	NA	NA	0.3372	-1.4183	NA	NA	NA	NA	NA	-0.6591	-0.8908	-0.2133
A0A0R4IAS2_K571k_1_1_571_571	A0A0R4IAS2	A0A0R4IAS2|A0A286YAI4	ppl	K571k	EAEAFLkSSPK	0	-0.8334	0.0723891	0.236085	-0.421917	0.282109	0.631732	0.105089	0.455105	0.585333	-0.637036	0.000855708	0.0155921	-0.6821	-1.8979	-1.5094	-1.1096	0.1831	0.3905	-0.4982	0.2676	-1.2003	NA	NA	0.5772	0.6335	0.1727	0.4048
A0A0R4IAS2_K69k_1_1_69_69	A0A0R4IAS2	A0A0R4IAS2|A0A286YAI4	ppl	K69k	INEGKPPLYQEDTSkR	0	-0.58355	0.0302658	0.143563	-0.346075	0.174953	0.51295	0.105089	0.455105	0.585333	-0.637036	0.000855708	0.0155921	0.1905	-0.2821	0.0696	-0.6538	-0.2186	-0.029	-0.2621	0.6644	0.3218	0.2576	NA	0.003	0.2323	0.0089	0.4605
A0A0R4IAW3_K674k_1_1_674_674	A0A0R4IAW3	A0A0R4IAW3|X1WDM1|B3DH85	A0A0R4IAW3_K674k_1_1_674_674	K674k	DIEEGkAAFTK	0	0.55225	0.0304242	0.143641	-0.389183	0.139884	0.464287	0.0986414	0.515272	0.638751	-0.426215	0.019219	0.1095	-0.2674	-0.2439	-0.1843	0.1722	0.2993	0.0293	0.2662	-0.5272	-0.6757	-1.3032	-0.2263	0.5831	0.8564	0.4124	0.4979
A0A0R4IBD8_K400k_1_1_400_400	A0A0R4IBD8	A0A0R4IBD8	A0A0R4IBD8_K400k_1_1_400_400	K400k	FIIGLQDQASATQNkEFDPLGPLPHGWEK	0	0.516133	0.126397	0.3133	-0.353208	0.204006	0.5461	-0.131375	0.259373	0.3918	-0.178435	0.161982	0.389802	-0.3691	NA	-1.0752	-0.6364	0.1865	-0.2006	0.2243	-1.3301	-1.0893	NA	NA	0.4835	-0.0142	0.7829	0.4409
A0A0R4IBD8_K414k_1_1_414_414	A0A0R4IBD8	A0A0R4IBD8	A0A0R4IBD8_K414k_1_1_414_414	K414k	EFDPLGPLPHGWEkR	0	-0.0439	0.917764	0.964066	0.187308	0.684165	0.898302	-0.131375	0.259373	0.3918	-0.178435	0.161982	0.389802	0.1117	1.5918	-0.8917	-0.2335	0.9039	-0.3608	0.0759	-0.0231	0.1678	0.606	0.0032	0.2724	0.1588	-0.2348	-0.1203
A0A0R4IBK5_K2169k_1_1_2169_2169	A0A0R4IBK5	A0A0R4IBK5	rnf213a	K2169k	SPkEVLELEMR	0	0.964167	0.00525464	0.0536621	0.0753333	0.756508	0.926733	-0.807376	0.00247289	0.0170283	0.0335448	0.887453	0.95185	-0.9482	-0.6635	-0.4008	NA	0.457	0.4142	0.3688	-1.3907	-1.8793	NA	NA	0.6228	0.4596	0.167	0.1026
A0A0R4IBK5_K2631k_1_1_2631_2631	A0A0R4IBK5	A0A0R4IBK5	rnf213a	K2631k	MYIkQIVER	0	-0.30695	0.343162	0.558203	0.414258	0.24014	0.591967	-0.807376	0.00247289	0.0170283	0.0335448	0.887453	0.95185	0.3103	0.4172	0.634	0.4454	0.1658	0.6683	0.1812	0.7835	-0.0808	0.866	1.466	-0.846	0.056	0.2839	0.2028
A0A0R4IBL4_K173k_1_1_173_173	A0A0R4IBL4	A0A0R4IBL4	dcun1d1	K173k	MEQELkDQGK	0	-0.238742	0.44272	0.643886	0.0702083	0.819668	0.948417	-0.187994	0.29702	0.431942	-0.253661	0.197894	0.436923	-0.945	-0.982	-0.4416	-0.9013	0.5347	-0.5963	-0.0118	-0.3358	-0.6795	-0.7209	NA	0.4806	-0.0004	-0.3733	-0.4856
A0A0R4IBL4_K81k_1_1_81_81	A0A0R4IBL4	A0A0R4IBL4	dcun1d1	K81k	LDVATDNFFQHPDLYVQNLkGTLDRK	0	0.0402083	0.923649	0.966654	-0.0971167	0.817085	0.948176	-0.187994	0.29702	0.431942	-0.253661	0.197894	0.436923	-1.2566	-1.2637	-1.5171	-1.0631	0.5658	0.8693	-0.232	-0.4061	-1.2642	-2.2757	NA	1.0873	0.7564	0.3086	-0.1597
A0A0R4IBL4_K87k_1_1_87_87	A0A0R4IBL4	A0A2R8QEZ7|B0V224|A0A0R4IBL4|A0A2R8QJK6|B0V225|B0V226|Q6P007	dcun1d1	K87k	kKLEQLYNR	0	0.5416	0.0963219	0.273285	0.013325	0.968306	0.991969	-0.187994	0.29702	0.431942	-0.253661	0.197894	0.436923	0.4179	0.409	0.6732	0.364	0.2747	0.2153	-0.0235	0.3634	0.5863	-0.1568	-1.0952	0.5104	-0.2674	0.228	0.0977
A0A0R4IBX9_K17k_1_1_17_17	A0A0R4IBX9	A0A0R4IBX9	si:ch73-1a9.3	K17k	ANNDAEVSEPkR	0	-0.324267	0.485358	0.681603	-0.462075	0.301291	0.648697	0.552042	0.00661363	0.0322079	0.314086	0.112388	0.318328	NA	-0.1088	0.7998	NA	-0.6818	NA	-0.8291	0.5845	0.621	0.8038	NA	-0.1448	-1.2491	0.4686	-0.2482
A0A0R4IBX9_K26k_1_1_26_26	A0A0R4IBX9	A0A0R4IBX9	si:ch73-1a9.3	K26k	LVNkPAPPK	0	0.10445	0.776723	0.883727	-0.601983	0.117764	0.426398	0.552042	0.00661363	0.0322079	0.314086	0.112388	0.318328	0.0995	-1.2616	0.16	-0.2009	-0.0786	-0.2536	0.015	-0.0513	0.0745	-1.2388	NA	0.643	0.377	0.4207	0.5443
A0A0R4IBX9_K6k_1_1_6_6	A0A0R4IBX9	A0A0R4IBX9	si:ch73-1a9.3	K6k	SkANNDAEVSEPK	0	-0.6234	0.0261539	0.133404	0.114367	0.681294	0.897262	0.552042	0.00661363	0.0322079	0.314086	0.112388	0.318328	0.2887	0.9136	0.9522	0.4104	-0.2199	-0.588	-0.5914	1.1482	1.378	1.3464	1.1859	-0.1354	-0.3172	-0.6068	-1.2638
A0A0R4IC31_K134k_1_1_134_134	A0A0R4IC31	A0A2R8QBS2|A0A2R8Q9F2|A0A0A0MPJ0|A0A0R4IC31|F2Z4T4	akap12b	K134k	QEEANEVGFkK	0	0.568675	0.0243022	0.128515	0.117308	0.639525	0.878725	0.384521	0.0144974	0.0538935	0.253499	0.108664	0.313222	-0.4359	-0.7955	-0.2743	0.2719	0.6405	0.3893	0.3944	-0.5987	-1.1558	-0.8204	-0.9336	0.4173	0.5079	0.2409	0.2636
A0A0R4IC31_K446k_1_1_446_446	A0A0R4IC31	A0A2R8QBS2|A0A2R8Q9F2|A0A0R4IC31|F2Z4T4	akap12b	K446k	LFTGAGLkK	0	-0.2684	0.38096	0.590547	-0.108725	0.739664	0.919263	0.384521	0.0144974	0.0538935	0.253499	0.108664	0.313222	0.1061	-0.1014	0.3227	0.7342	0.1253	-0.024	0.2095	0.0155	-0.012	0.6933	1.4384	0.2938	0.3225	-0.1012	0.3342
A0A0R4IC31_K537k_1_1_537_537	A0A0R4IC31	A0A2R8QBS2|A0A2R8Q9F2|A0A0R4IC31|F2Z4T4	akap12b	K537k	EGILPWSSFkK	0	-0.257425	0.270128	0.482667	-0.0550667	0.823681	0.950588	0.384521	0.0144974	0.0538935	0.253499	0.108664	0.313222	-0.2908	0.2041	0.3771	0.0979	0.306	0.3001	0.1836	-0.0901	0.3704	0.9256	0.2121	0.3061	0.4238	0.2516	0.2917
A0A0R4IC54_K51k_1_1_51_51	A0A0R4IC54	A0A0R4IC54	hspb7	K51k	GLFADDFGSFMCPkDALGFPNR	0	NA	NA	NA	0.721092	0.149709	0.477767	1.16415	5.32605e-06	0.000504147	1.07056	2.76907e-05	0.0020181	-1.183	NA	NA	NA	0.5159	-0.0284	0.1532	NA	NA	NA	NA	-0.9147	-0.1426	0.5386	-1.5114
A0A0R4IC81_K495k_1_1_495_495	A0A0R4IC81	A0A2R8RY78|A0A0R4IC81	abcc1	K495k	TYQVAQMkSK	0	1.128	0.125549	0.312371	0.420225	0.584112	0.847651	-1.89466	0.000672627	0.0077	-0.531877	0.268077	0.520158	0.694	0.9353	0.9242	1.4914	0.0663	0.857	1.1383	-1.3498	-0.8498	0.4651	1.2674	-2.2387	1.4213	1.141	0.7443
A0A0R4ICE9_K399k_1_1_399_399	A0A0R4ICE9	Q7SXP2|A0A0R4ICE9|F1QR83	A0A0R4ICE9_K399k_1_1_399_399	K399k	LFCkNAAFLR	0	-0.25655	0.513436	0.702069	0.396033	0.318153	0.662446	-0.173002	0.0853729	0.181142	-0.324621	0.00658343	0.0557657	0.1805	-0.1085	0.1045	0.2677	0.2188	0.6928	0.4034	NA	-0.815	1.224	0.6938	-0.0354	0.554	-0.294	-0.0554
A0A0R4ID81_K101k_1_1_101_101	A0A0R4ID81	A0A0R4IK26|A0A0R4ID81	rab11fip2	K101k	FLGQkLINLNEIFDNK	0	NA	NA	NA	-1.03377	0.104958	0.404302	0.291864	0.470665	0.598188	-0.756901	0.0979797	0.292175	-0.3756	NA	-0.2759	NA	-1.3158	-0.4432	-1.1937	NA	NA	NA	NA	NA	-1.4153	1.0113	0.5526
A0A0R4ID82_K277k_1_1_277_277	A0A0R4ID82	A0A0R4ID82	vps33a	K277k	KQGEGGkDLPTEPK	0	-0.528725	0.17144	0.373467	-0.452667	0.18341	0.523744	-0.113316	0.438106	0.569125	-0.00237996	0.987823	0.99386	-0.1034	-1.0208	0.009	-0.8473	0.1859	-0.4561	-0.3753	NA	0.0431	0.0331	NA	0.7759	0.287	0.1636	-0.2765
A0A0R4IDE1_K569k_1_1_569_569	A0A0R4IDE1	A0A0R4IDE1|E7FH53	myot	K569k	NNQQkISYEER	0	-1.34333	0.0101733	0.0772469	0.0845667	0.794748	0.941885	0.858195	4.03245e-05	0.00158115	0.285406	0.083298	0.267304	0.0211	0.448	0.075	0.0554	-0.6604	0.4496	0.0662	NA	NA	NA	1.4932	NA	0.1842	-0.1285	-0.454
A0A0R4IDZ8_K1543k_1_1_1543_1543	A0A0R4IDZ8	A0A0R4IDZ8|Q5U7N6	tln1	K1543k	SIkAIDGAFNQENR	0	0.06395	0.856211	0.92901	-0.504392	0.198185	0.537381	0.259148	0.143813	0.260407	0.127358	0.491354	0.718914	0.0971	0.1546	0.415	-0.0567	-0.0947	-0.4259	-0.0145	0.51	0.6111	0.5192	-1.2861	0.6496	0.3703	0.0909	0.1933
A0A0R4IDZ8_K334k_1_1_334_334	A0A0R4IDZ8	A0A0R4IDZ8|Q5U7N6	tln1	K334k	LLGITkESVMR	0	-0.555575	0.1907	0.394773	-0.341292	0.353843	0.697701	0.259148	0.143813	0.260407	0.127358	0.491354	0.718914	0.1893	-0.126	0.4837	-0.9183	-0.2691	-0.0557	-0.444	-0.1835	1.109	NA	NA	0.1079	0.3197	-0.1394	0.0519
A0A0R4IDZ8_K889k_1_1_889_889	A0A0R4IDZ8	A0A0R4IDZ8|Q5U7N6	tln1	K889k	GAAANPDSEEQQQkLR	0	NA	NA	NA	-0.861067	0.0355902	0.233718	0.259148	0.143813	0.260407	0.127358	0.491354	0.718914	NA	NA	NA	NA	-0.8398	-1.0219	-0.5133	NA	NA	NA	NA	NA	0.284	NA	-0.1452
A0A0R4IE10_K439k_1_1_439_439	A0A0R4IE10	A0A0R4IE10|A0A2R8Q469	eef1a1l2	K439k	QTVAVGVIkAVDK	0	-0.0488333	0.861999	0.932648	-0.370542	0.200406	0.540257	1.06407	0.0123312	0.0483689	0.737437	0.0849204	0.269978	0.3942	0.6986	-0.4719	-0.0409	-0.1356	-0.1151	0.3822	0.1982	-0.006	0.3893	NA	0.4585	0.1718	0.5765	0.4507
A0A0R4IE55_K424k_1_1_424_424	A0A0R4IE55	A5PMU4|A0A0R4IE55	anks1b	K424k	NLGFSQDkR	0	0.107725	0.693027	0.829285	0.544758	0.0789874	0.358269	0.322355	0.0706784	0.159574	0.0765603	0.671876	0.84464	0.4533	0.6823	0.6607	0.188	0.4836	0.0658	0.246	0.6771	0.814	0.4174	-0.3551	-0.5124	-0.5489	0.2263	-0.2835
A0A0R4IEA2_K240k_1_1_240_240	A0A0R4IEA2	A0A2R8QKU6|A0A0R4IEA2	exoc6b	K240k	IRkEGYGSTEVDR	0	-0.61025	0.11809	0.30198	-0.421208	0.269739	0.62129	0.540955	0.194546	0.318239	0.265	0.545577	0.760369	-0.5574	-0.6346	0.16	-0.3966	0.5096	-0.5002	-0.4058	0.0528	0.0263	0.6802	NA	0.9277	0.5805	0.2258	-0.5777
A0A0R4IEK3_K321k_1_1_321_321	A0A0R4IEK3	Q5PYH5|A0A0R4IEK3|A0A0R4IVS8	dlg1l	K321k	VMEIkLIK	0	1.83642	1.76288e-05	0.00224966	0.152725	0.546654	0.824307	0.314735	0.0162052	0.0580967	0.0526148	0.675607	0.846249	0.0138	0.4173	0.2284	0.9794	0.2683	0.153	0.4679	-1.3261	-1.5273	NA	NA	0.0431	0.2441	0.2954	-0.0079
A0A0R4IEK3_K361k_1_1_361_361	A0A0R4IEK3	E7FAT1|A0A0R4IVD3|A0A2U3TW57|A0A0R4IEK3|A0A0R4IVS8|F1QCS0	dlg1l	K361k	IIEGGAAHkDGR	0	-0.135083	0.505542	0.698544	0.230183	0.26367	0.613827	0.314735	0.0162052	0.0580967	0.0526148	0.675607	0.846249	0.5489	0.5755	0.4264	0.2514	-0.055	-0.3141	0.083	0.556	0.7645	0.4364	NA	-0.3951	-0.3904	-0.3256	-0.1911
A0A0R4IEM0_K198k_1_1_198_198	A0A0R4IEM0	E9QC85|A0A0R4IEM0	A0A0R4IEM0_K198k_1_1_198_198	K198k	YYkDEVGVNR	0	0.005625	0.987543	0.993015	-0.0935167	0.768884	0.931683	-1.09944	0.0987587	0.200553	-0.295782	0.664865	0.841323	0.2335	0.4098	0.5123	1.1979	-0.2483	-0.6482	0.3596	NA	0.2659	0.8996	NA	0.1149	-0.0488	-0.4723	0.0644
A0A0R4IEP9_K363k_1_1_363_363	A0A0R4IEP9	A0A0R4IEP9|B0UY93	A0A0R4IEP9_K363k_1_1_363_363	K363k	LQVANkER	0	0.013925	0.969101	0.986656	0.822108	0.035326	0.233718	-0.138226	0.352593	0.487688	0.292308	0.0818052	0.265263	0.4894	-0.361	0.9285	0.3932	0.2875	1.2893	0.865	0.4703	0.3548	0.2207	NA	-0.3185	-0.5342	0.1135	0.7065
A0A0R4IET1_K164k_1_1_164_164	A0A0R4IET1	A0A0R4IET1	gga3a	K164k	TLIPSPkTK	0	-0.560442	0.0844288	0.254506	-0.584183	0.0733194	0.344568	-0.885641	0.0758213	0.167255	0.0733528	0.884548	0.950485	-1.1307	-0.4893	0.3348	-0.5575	-0.3455	0.2302	0.1437	-0.002	0.2256	0.0757	NA	0.7725	0.8014	0.2902	0.5105
A0A0R4IET1_K166k_1_1_166_166	A0A0R4IET1	A0A0R4IET1	gga3a	K166k	TkNPVFDNEEK	0	0.2693	0.260925	0.47363	0.178033	0.485588	0.788192	-0.885641	0.0758213	0.167255	0.0733528	0.884548	0.950485	0.2783	0.2888	0.4941	0.4221	0.1243	0.3029	0.3283	-0.2878	-0.0155	-0.1127	0.8221	0.1972	0.2189	0.0586	-0.1795
A0A0R4IET1_K203k_1_1_203_203	A0A0R4IET1	A0A0R4IET1	gga3a	K203k	NMVkEDEALQQK	0	-0.110425	0.739055	0.861828	-0.0233333	0.947948	0.989668	-0.885641	0.0758213	0.167255	0.0733528	0.884548	0.950485	-0.0851	0.8052	0.8642	-0.6824	-0.551	0.4967	0.0344	0.1088	0.223	0.3203	0.6915	-0.0003	0.2267	-0.0086	-0.151
A0A0R4IET1_K211k_1_1_211_211	A0A0R4IET1	A0A0R4IET1	gga3a	K211k	EDEALQQkVSNR	0	0.137317	0.760259	0.87557	-0.460833	0.314007	0.659531	-0.885641	0.0758213	0.167255	0.0733528	0.884548	0.950485	-0.8748	-0.7027	-1.47	-0.3759	0.2777	0.366	0.3816	-0.1506	-0.3721	-2.4568	NA	1.0758	0.7814	0.6238	0.7294
A0A0R4IET1_K221k_1_1_221_221	A0A0R4IET1	A0A0R4IET1	gga3a	K221k	VSTLEkVNNSVK	0	0.041325	0.851681	0.926859	-0.224758	0.353278	0.6973	-0.885641	0.0758213	0.167255	0.0733528	0.884548	0.950485	0.369	0.2258	0.2938	0.3039	-0.1707	0.4098	0.4199	0.0631	0.5003	-0.1913	0.6551	0.4021	0.5331	0.3804	0.4621
A0A0R4IET1_K250k_1_1_250_250	A0A0R4IET1	A0A0R4IET1	gga3a	K250k	ELLkDLYNDCDNLR	0	-0.136267	0.69068	0.827227	-0.22455	0.514058	0.802987	-0.885641	0.0758213	0.167255	0.0733528	0.884548	0.950485	0.4202	-0.4719	0.4703	0.0278	0.0398	0.3924	0.4402	NA	-0.2203	-0.0891	1.053	0.0962	0.3729	0.7859	0.8064
A0A0R4IFJ1_K351k_1_1_351_351	A0A0R4IFJ1	F1QNW8|A0A0R4IFJ1|A0A2R8RZS4	dnajc7	K351k	AIkLDETYIK	0	-0.1616	0.596225	0.760614	0.0338	0.917905	0.984987	-0.349117	0.00951085	0.0406454	-0.167582	0.199231	0.438655	0.3634	-0.4496	-0.1007	-0.2319	0.2328	0.5232	0.1197	-0.5952	-0.2988	0.1755	0.9461	0.2399	0.5938	0.0176	0.1811
A0A0R4IFJ1_K413k_1_1_413_413	A0A0R4IFJ1	F1QNW8|A0A0R4IFJ1	dnajc7	K413k	DYYkVLGVDK	0	0.34905	0.253621	0.467314	0.117792	0.693955	0.90001	-0.349117	0.00951085	0.0406454	-0.167582	0.199231	0.438655	-0.0371	0.048	-0.0077	0.2346	0.3635	0.6947	0.0409	0.4391	-0.9311	-0.3768	NA	0.2966	-0.048	0.2466	0.4991
A0A0R4IFK0_K229k_1_1_229_229	A0A0R4IFK0	F1QMV0|A0A0R4IFK0	capn2a	K229k	SAPTNLFQIIkK	0	0.4313	0.0795846	0.246118	0.373483	0.15244	0.482016	0.371046	0.0786363	0.171437	-0.191895	0.377076	0.623702	0.2152	0.6148	0.4089	0.742	0.2653	0.299	0.6856	-0.1032	-0.0113	0.42	-0.0498	-0.4782	0.147	0.4252	0.0786
A0A0R4IFL5_K418k_1_1_418_418	A0A0R4IFL5	A0A0R4IFL5	A0A0R4IFL5_K418k_1_1_418_418	K418k	QLAQYHAkDPNNLFMVR	0	-0.47645	0.45589	0.658211	-0.0217667	0.959755	0.991969	0.358268	0.00139857	0.0121728	0.325273	0.00474238	0.0448159	-0.5287	-1.9538	-0.5156	-0.4065	0.3319	0.3237	-0.6573	NA	-0.3747	NA	NA	-0.1606	0.6597	-0.4907	0.0764
A0A0R4IFT8_K1340k_1_1_1340_1340	A0A0R4IFT8	A0A0R4IFT8	usp47	K1340k	ALkIYLDGGPTK	0	NA	NA	NA	1.22783	0.00223017	0.049994	-0.1514	0.213349	0.339771	-0.396816	0.00739479	0.0595991	-0.5723	NA	0.2592	NA	0.4069	0.4805	0.2956	NA	NA	NA	NA	-0.8334	-0.3718	-0.7648	-1.364
A0A0R4IFU8_K313k_1_1_313_313	A0A0R4IFU8	A0A0R4IFU8|E7F9I0|A0A2R8PZM0|E9QD53|Q567H4|Q803K8	A0A0R4IFU8_K313k_1_1_313_313	K313k	TLIEELkALK	0	0.138975	0.529802	0.713862	-0.180375	0.45159	0.763641	0.0699845	0.674738	0.769776	0.0419597	0.815361	0.917679	-0.3147	0.2018	0.0881	-0.2025	0.2474	0.5366	0.1286	-0.024	0.029	-0.406	-0.3822	0.876	0.5648	0.2643	0.2332
A0A0R4IG31_K165k_1_1_165_165	A0A0R4IG31	A0A0R4IG31	cryabb	K165k	TTVAGPQkR	0	-0.1489	0.745469	0.86661	-0.01585	0.972308	0.992673	0.0896995	0.392886	0.525893	0.0890145	0.431428	0.671169	0.375	NA	0.4524	NA	NA	-0.3929	-0.743	NA	0.5626	NA	NA	NA	NA	NA	-0.5521
A0A0R4IGG3_K13k_1_1_13_13	A0A0R4IGG3	Q90XG0|E9QBF0|A0A2R8QNR8|A0A0R4IGG3	tpi1b	K13k	FFVGGNWkMNGDKK	0	-0.2194	0.464373	0.667051	0.174883	0.587693	0.849	0.652942	0.0289514	0.0864046	-0.292894	0.325983	0.578846	0.5437	0.9837	0.6102	0.327	0.0989	-0.1798	-0.2607	0.7572	1.2748	0.7364	0.5738	0.5157	-1.0827	-0.3706	-0.2174
A0A0R4IGG3_K141k_1_1_141_141	A0A0R4IGG3	A0A2R8QNR8|A0A0R4IGG3	tpi1b	K141k	LDEREAGITEkVVFAQTK	0	0.544025	0.0534614	0.201039	0.945383	0.00417713	0.0708711	0.652942	0.0289514	0.0864046	-0.292894	0.325983	0.578846	1.1231	0.7533	0.6781	1.3107	-0.2977	0.4753	0.1741	0.2723	-0.1572	0.8439	0.7301	-1.0019	-0.844	-0.5529	-0.9138
A0A0R4IGG3_K155k_1_1_155_155	A0A0R4IGG3	A0A2R8QNR8|A0A0R4IGG3	tpi1b	K155k	FIADNVkDWSK	0	-0.563825	0.309504	0.522354	0.187958	0.749953	0.925142	0.652942	0.0289514	0.0864046	-0.292894	0.325983	0.578846	-0.5896	-0.5558	-0.8261	-0.56	0.9178	-0.6057	-0.7035	0.8024	0.3048	-0.478	-0.9054	1.463	-0.5072	-1.0484	-1.1811
A0A0R4IGG3_K174k_1_1_174_174	A0A0R4IGG3	E9QBF0|A0A2R8QNR8|A0A0R4IGG3	tpi1b	K174k	VVLAYEPVWAIGTGkTASPQQAQEVHDK	0	0.8682	0.0442027	0.180646	0.1604	0.712526	0.905589	0.652942	0.0289514	0.0864046	-0.292894	0.325983	0.578846	0.6398	0.2882	0.1399	0.2982	-0.4938	0.4904	0.262	-1.0187	-0.7283	-0.5828	0.2231	-1.4021	0.488	0.5516	0.0657
A0A0R4IGG3_K68k_1_1_68_68	A0A0R4IGG3	E9QBF0|A0A2R8QNR8|A0A0R4IGG3	tpi1b	K68k	LNPNIDVAAQNCYkVAK	0	-0.1278	0.686269	0.824482	-0.672642	0.0630549	0.320906	0.652942	0.0289514	0.0864046	-0.292894	0.325983	0.578846	-0.4059	-0.3093	-0.8041	-0.8406	-0.1397	0.2919	-0.2403	-0.97	-0.7405	-0.2909	0.1527	-0.2405	1.0093	0.9958	0.8085
A0A0R4IGG3_K71k_1_1_71_71	A0A0R4IGG3	Q90XG0|E9QBF0|A0A2R8QNR8|A0A0R4IGG3	tpi1b	K71k	VAkGAFTGEISPAMIK	0	0.526675	0.188623	0.392434	0.227642	0.589702	0.849341	0.652942	0.0289514	0.0864046	-0.292894	0.325983	0.578846	0.4967	0.0773	0.5618	0.5246	-0.4782	0.0118	0.4096	-0.2686	-0.7158	-0.0034	0.5415	-1.5596	0.2336	0.0711	0.2686
A0A0R4IGP9_K1104k_1_1_1104_1104	A0A0R4IGP9	A0A0R4IGP9|F1QNZ9|Q0IJ38	A0A0R4IGP9_K1104k_1_1_1104_1104	K1104k	YTCkAINDLGEDEVECRLEVR	0	0.271575	0.397382	0.604865	0.209358	0.543435	0.822114	-0.225236	0.333024	0.46799	0.0249728	0.919348	0.966444	-0.4281	0.3714	-0.7905	-0.8691	0.6205	0.7423	0.3143	0.0951	-0.6107	-1.0455	-1.2415	0.1299	0.2685	0.4648	0.5355
A0A0R4IGP9_K136k_1_1_136_136	A0A0R4IGP9	A0A0R4IGP9|F1QNZ9|Q0IJ38	A0A0R4IGP9_K136k_1_1_136_136	K136k	VVDGDAGGYRCEVTSkDK	0	-0.320825	0.235914	0.449339	1.16283	0.000858903	0.0297564	-0.225236	0.333024	0.46799	0.0249728	0.919348	0.966444	0.0858	0.4102	-0.5798	0.0377	0.5202	0.9301	0.363	-0.2411	0.6635	0.3155	0.4993	-0.8822	-0.562	-0.4833	-0.3061
A0A0R4IGP9_K207k_1_1_207_207	A0A0R4IGP9	A0A0R4IGP9|F1QNZ9|Q0IJ38	A0A0R4IGP9_K207k_1_1_207_207	K207k	NAkPCDYEK	0	0.205575	0.510304	0.70169	-0.0687833	0.824439	0.950588	-0.225236	0.333024	0.46799	0.0249728	0.919348	0.966444	-0.4567	-0.4923	0.2005	-0.502	0.0849	0.3298	-0.1688	-0.3977	0.0786	-1.2355	NA	-0.1502	0.0991	0.3732	0.2809
A0A0R4IGP9_K277k_1_1_277_277	A0A0R4IGP9	A0A0R4IGP9|F1QNZ9|Q0IJ38	A0A0R4IGP9_K277k_1_1_277_277	K277k	WLkNGQEIKPSAK	0	-1.01075	0.000202203	0.00791995	0.27835	0.233647	0.585015	-0.225236	0.333024	0.46799	0.0249728	0.919348	0.966444	-0.5044	-0.1097	-0.2787	-0.2056	0.3346	0.5106	0.2285	0.6495	0.4401	1.0227	0.8323	0.2143	-0.3739	0.2491	0.2287
A0A0R4IGP9_K776k_1_1_776_776	A0A0R4IGP9	A0A0R4IGP9|Q0IJ38	A0A0R4IGP9_K776k_1_1_776_776	K776k	ANETPVEkNSFR	0	0.1069	0.817801	0.909387	0.0166417	0.96753	0.991969	-0.225236	0.333024	0.46799	0.0249728	0.919348	0.966444	0.0925	0.4214	0.6262	0.0327	-0.259	0.0859	-0.5587	-0.0049	0.3775	NA	NA	0.8418	0.0632	-1.1141	-0.8332
A0A0R4IGP9_K87k_1_1_87_87	A0A0R4IGP9	A0A0R4IGP9	A0A0R4IGP9_K87k_1_1_87_87	K87k	GkWLDLASK	0	0.5268	0.437425	0.640571	-0.352967	0.623984	0.87197	-0.225236	0.333024	0.46799	0.0249728	0.919348	0.966444	0.2595	-0.718	0.3006	0.0363	-1.3461	0.7177	0.2884	NA	-2.4634	-0.0432	0.835	NA	0.497	0.0487	0.1732
A0A0R4IGP9_K94k_1_1_94_94	A0A0R4IGP9	A0A0R4IGP9|F1QNZ9|Q0IJ38	A0A0R4IGP9_K94k_1_1_94_94	K94k	WLDLASkAGK	0	0.133567	0.828361	0.914934	-0.0161667	0.980399	0.994226	-0.225236	0.333024	0.46799	0.0249728	0.919348	0.966444	0.3034	-0.0051	-0.6743	-0.028	-1.6653	1.361	0.5252	-0.877	NA	-0.7642	0.9375	NA	0.1446	0.0507	0.0741
A0A0R4IGQ7_K163k_1_1_163_163	A0A0R4IGQ7	A0A0R4IGQ7	fkbp3	K163k	PLSFkVGMGK	0	NA	NA	NA	0.539475	0.172134	0.508517	-0.117178	0.325736	0.461303	-0.166848	0.201283	0.44164	NA	NA	NA	-0.1936	0.2346	0.1177	-0.1849	NA	NA	NA	NA	0.0922	0.046	-0.9118	-1.1611
A0A0R4IGQ8_K108k_1_1_108_108	A0A0R4IGQ8	A0A0R4IGQ8|A0A140LH33	myom1b	K108k	AkVSAGYVSGR	0	-0.04135	0.853208	0.92775	0.1439	0.522502	0.809531	0.386956	0.145113	0.261982	0.23899	0.391327	0.637238	0.014	-0.0792	0.1527	0.0635	0.2085	0.3597	0.066	0.2716	0.3395	-0.3738	NA	-0.0622	0.2758	-0.0112	0.0676
A0A0R4IGQ8_K1176k_1_1_1176_1176	A0A0R4IGQ8	A0A0R4IGQ8|A0A0R4IUZ8	myom1b	K1176k	DSTALWYkDGREVK	0	0.4237	0.199915	0.404595	1.07048	0.00676628	0.0933034	0.386956	0.145113	0.261982	0.23899	0.391327	0.637238	0.8585	0.6748	0.5616	1.179	-0.2505	0.7031	0.2107	0.1114	0.4503	0.7512	0.2662	0.1559	-1.1245	-1.0627	-1.3662
A0A0R4IGQ8_K1311k_1_1_1311_1311	A0A0R4IGQ8	A0A0R4IGQ8|A0A0R4IUZ8	myom1b	K1311k	GkYAIEFFDGK	0	-0.338425	0.290088	0.500474	0.117108	0.730249	0.915432	0.386956	0.145113	0.261982	0.23899	0.391327	0.637238	0.0919	0.5887	-0.8537	0.4776	-0.2058	0.6657	0.3727	0.5838	0.4398	-0.035	0.6696	0.4915	-0.0953	0.0844	0.1611
A0A0R4IGQ8_K1320k_1_1_1320_1320	A0A0R4IGQ8	A0A0R4IGQ8|A0A0R4IUZ8	myom1b	K1320k	YAIEFFDGkGGLRR	0	0.0791333	0.759685	0.875417	-0.35695	0.181139	0.520805	0.386956	0.145113	0.261982	0.23899	0.391327	0.637238	0.3685	0.8972	0.5437	0.2794	-0.1691	-0.1397	-0.2312	NA	0.8352	0.2054	0.2886	0.6031	0.2821	0.0587	-0.2361
A0A0R4IGQ8_K1391k_1_1_1391_1391	A0A0R4IGQ8	A0A0R4IGQ8|A0A0R4IUZ8	myom1b	K1391k	SLNLTCNIWGDPVPEVTWLkNER	0	NA	NA	NA	-0.247833	0.630836	0.876522	0.386956	0.145113	0.261982	0.23899	0.391327	0.637238	NA	NA	-0.6228	NA	NA	NA	-0.3588	NA	NA	NA	NA	NA	0.1905	0.088	-0.6114
A0A0R4IGQ8_K171k_1_1_171_171	A0A0R4IGQ8	A0A0R4IGQ8|A0A140LH33	myom1b	K171k	RQNEDSLMHTPEFVIkPR	0	0.003775	0.988847	0.993098	0.713558	0.0175373	0.164335	0.386956	0.145113	0.261982	0.23899	0.391327	0.637238	0.4947	0.3127	0.017	0.1267	0.5932	0.4107	0.0975	-0.2133	0.5334	0.3819	NA	-0.1402	-0.8179	0.0255	-0.4531
A0A0R4IGQ8_K201k_1_1_201_201	A0A0R4IGQ8	A0A0R4IGQ8|A0A0R4IUZ8	myom1b	K201k	VVWYkNNVSIDPMSNPGK	0	-1.6573	4.66918e-06	0.00126274	-1.02908	0.00118579	0.0347611	0.386956	0.145113	0.261982	0.23899	0.391327	0.637238	-0.3642	0.0009	-0.7294	-0.6259	-0.2083	-0.3002	-0.589	0.8905	0.9612	1.5686	1.4903	1.0536	0.426	0.6946	0.4788
A0A0R4IGQ8_K262k_1_1_262_262	A0A0R4IGQ8	A0A0R4IGQ8	myom1b	K262k	RFkGEFDESLPSPR	0	0.246975	0.278382	0.48663	0.243325	0.321206	0.665594	0.386956	0.145113	0.261982	0.23899	0.391327	0.637238	0.5149	0.5494	0.1707	0.5798	0.4011	0.1562	0.1756	0.1505	0.1922	0.2463	0.2379	0.4818	0.266	-0.3046	-0.4393
A0A0R4IGQ8_K554k_1_1_554_554	A0A0R4IGQ8	A0A0R4IGQ8|A0A0R4IUZ8	myom1b	K554k	GHEGVMYYVEkCVSGTDSWQR	0	0.859725	0.00836777	0.069253	0.244542	0.437031	0.754234	0.386956	0.145113	0.261982	0.23899	0.391327	0.637238	0.625	-0.1253	-0.1241	-0.0806	0.0545	0.9629	0.6562	-0.9722	-1.2426	-0.6821	-0.247	-0.1838	0.5224	0.4388	0.4759
A0A0R4IGQ8_K585k_1_1_585_585	A0A0R4IGQ8	A0A0R4IGQ8|A0A0R4IUZ8	myom1b	K585k	FALFDLAEGkSYR	0	0.5028	0.246484	0.460165	0.0088	0.981154	0.994226	0.386956	0.145113	0.261982	0.23899	0.391327	0.637238	0.5444	-0.1365	0.482	0.2731	-0.3965	0.3374	0.0783	NA	-0.4661	0.042	NA	-1.0142	0.0125	0.6838	0.3083
A0A0R4IGQ8_K765k_1_1_765_765	A0A0R4IGQ8	A0A0R4IGQ8|A0A0R4IUZ8	myom1b	K765k	EVTGGVPGkWHEANIK	0	-0.281817	0.272183	0.483877	0.487017	0.0682197	0.333696	0.386956	0.145113	0.261982	0.23899	0.391327	0.637238	-0.5452	-0.419	-0.6122	-0.541	0.7868	0.6626	0.2356	-0.0781	0.045	-0.7095	NA	0.4469	-0.2399	0.0508	0.0408
A0A0R4IGQ8_K785k_1_1_785_785	A0A0R4IGQ8	A0A0R4IGQ8|A0A0R4IUZ8	myom1b	K785k	VSELkENMLYQFQVR	0	0.36455	0.159092	0.358229	0.251858	0.358303	0.700409	0.386956	0.145113	0.261982	0.23899	0.391327	0.637238	0.4533	0.0122	0.6855	0.2051	0.3544	0.6091	-0.031	-0.2847	0.367	-0.1925	0.0081	-0.4573	0.073	0.3519	0.2683
A0A0R4IGQ8_K876k_1_1_876_876	A0A0R4IGQ8	A0A0R4IGQ8|A0A0R4IUZ8	myom1b	K876k	GVNEkATDK	0	0.697275	0.205592	0.411754	1.31648	0.0135418	0.143714	0.386956	0.145113	0.261982	0.23899	0.391327	0.637238	-0.5436	-0.3132	-1.0862	0.0175	0.3125	0.8717	0.6039	-0.8278	-1.5295	NA	NA	-2.0304	-0.8191	0.3699	-0.4022
A0A0R4IGQ8_K884k_1_1_884_884	A0A0R4IGQ8	A0A0R4IGQ8|A0A0R4IUZ8	myom1b	K884k	AFFkVNDLK	0	-0.343675	0.39862	0.605633	0.450192	0.273181	0.625175	0.386956	0.145113	0.261982	0.23899	0.391327	0.637238	0.2011	0.1168	0.1376	0.2018	0.7092	-0.0559	0.1854	0.9037	0.3845	0.2358	NA	0.8174	-1.3618	0.1245	-0.2626
A0A0R4IGQ8_K889k_1_1_889_889	A0A0R4IGQ8	A0A0R4IGQ8|A0A0R4IUZ8	myom1b	K889k	VNDLkGGESYVFR	0	-0.177875	0.40139	0.607136	-0.156817	0.491679	0.790153	0.386956	0.145113	0.261982	0.23899	0.391327	0.637238	0.2827	0.7609	0.4605	0.2979	0.0696	-0.3457	0.0563	0.4143	0.9306	0.6703	0.4983	0.155	-0.0434	-0.1412	0.3638
A0A0R4IGQ8_K903k_1_1_903_903	A0A0R4IGQ8	A0A0R4IGQ8|A0A0R4IUZ8	myom1b	K903k	AQNkAGVGK	0	1.44907	0.00241806	0.0339214	1.13865	0.0182969	0.167835	0.386956	0.145113	0.261982	0.23899	0.391327	0.637238	0.6861	-0.0017	-0.1917	0.8498	-0.4062	1.3736	0.8221	-0.3124	-0.8597	-1.987	-1.2947	-0.716	-0.7231	-0.2989	-0.4306
A0A0R4IGQ8_K956k_1_1_956_956	A0A0R4IGQ8	A0A0R4IGQ8|A0A0R4IUZ8	myom1b	K956k	FVWSkNYEEMTEPER	0	0.819725	0.0030496	0.0386637	1.19903	0.0002437	0.013961	0.386956	0.145113	0.261982	0.23899	0.391327	0.637238	1.4406	1.5003	0.9796	1.2754	-0.3995	0.5569	0.0497	0.4101	0.3716	0.5938	0.5415	-0.8323	-1.5187	-0.9849	-1.1841
A0A0R4IGQ8_K972k_1_1_972_972	A0A0R4IGQ8	A0A0R4IGQ8|A0A0R4IUZ8	myom1b	K972k	NYEEMTEPERMTLETkGSK	0	0.124975	0.481098	0.677908	0.455917	0.0275068	0.210033	0.386956	0.145113	0.261982	0.23899	0.391327	0.637238	0.8797	0.8491	0.9014	0.7362	-0.0567	-0.2252	-0.1283	0.7615	0.8578	0.7428	0.5044	-0.4806	-0.8193	-0.4365	-0.6342
A0A0R4IH04_K164k_1_1_164_164	A0A0R4IH04	A0A0R4IH04	aglb	K164k	EVNLHSGITAGkLALNK	0	-0.940683	0.00395885	0.0455503	-0.269542	0.247325	0.597319	0.218582	0.249258	0.380055	0.443919	0.0411957	0.175317	-2.5635	NA	-2.4027	-2.5207	0.4824	0.244	0.0621	NA	-1.3505	-1.7594	NA	0.5498	0.5673	0.267	0.7454
A0A0R4IH04_K169k_1_1_169_169	A0A0R4IH04	A0A0R4IH04	aglb	K169k	LALNkLHQELAENGFTQVYVDQLDEDTVAVTR	0	NA	NA	NA	-0.801667	0.180613	0.520663	0.218582	0.249258	0.380055	0.443919	0.0411957	0.175317	-0.9218	NA	-0.8662	NA	-1.2237	-0.7334	-0.4782	NA	NA	NA	NA	NA	-1.3972	0.3137	1.0532
A0A0R4IH04_K275k_1_1_275_275	A0A0R4IH04	A0A2R8RZY5|A0A0R4IH04	aglb	K275k	EHIQLkESQIVK	0	-0.471133	0.110816	0.294045	0.283033	0.32394	0.668286	0.218582	0.249258	0.380055	0.443919	0.0411957	0.175317	-0.1081	0.6635	-0.0063	0.1737	-0.0068	-0.0773	-0.0223	0.6504	0.3203	0.9848	NA	0.1596	-0.876	-0.1819	-0.3757
A0A0R4IH96_K195k_1_1_195_195	A0A0R4IH96	A0A0R4IH96|A0A0R4IPQ5|Q7ZTS0	bco1	K195k	kIDPVTLETQEK	0	-0.152925	0.535083	0.716383	-0.353333	0.163791	0.498267	-0.322638	0.0534765	0.1313	0.167892	0.32452	0.577672	0.2174	0.1864	0.1435	0.3802	0.1678	-0.2114	-0.2745	0.6767	0.2119	0.2658	NA	0.6883	-0.1663	0.0919	0.3753
A0A0R4IHE1_K237k_1_1_237_237	A0A0R4IHE1	A0A0R4IHE1|A0A0R4IV65	uba2	K237k	ATASDQDGDIkR	0	-1.0623	0.00990006	0.0767934	0.105542	0.789848	0.940882	-0.153729	0.417702	0.550169	-0.0958663	0.636907	0.82581	-0.4617	-1.0836	-0.0361	0.0315	0.7507	-0.1875	0.4396	0.2067	-0.0725	1.3575	1.2076	0.0968	0.7442	-0.1484	0.2223
A0A0R4IHN7_K106k_1_1_106_106	A0A0R4IHN7	A0A0R4IHN7|A0A2R8PYV3	A0A0R4IHN7_K106k_1_1_106_106	K106k	IEDMAMMTHLNEPCVLYNLkER	0	-0.0983	0.802621	0.898972	-0.921067	0.0337466	0.23057	0.965925	0.185351	0.308866	-0.764188	0.324225	0.57749	-1.1733	NA	-0.1686	-0.3024	-0.2799	-0.132	-0.5797	-0.8146	NA	-0.9424	0.4076	NA	0.9049	0.365	0.5017
A0A0R4IHN7_K205k_1_1_205_205	A0A0R4IHN7	A0A0R4IHN7	A0A0R4IHN7_K205k_1_1_205_205	K205k	RVIQYFATVGAMSGAkK	0	-0.1669	0.62215	0.77813	0.389483	0.294105	0.643567	0.965925	0.185351	0.308866	-0.764188	0.324225	0.57749	0.2039	-0.8709	0.0031	0.6949	0.8439	0.2669	0.1865	0.5735	0.3058	-0.0004	-0.1803	0.5524	0.0968	-0.6331	0.1557
A0A0R4IHN7_K206k_1_1_206_206	A0A0R4IHN7	A0A2R8QLD9|A0A0R4IHN7	A0A0R4IHN7_K206k_1_1_206_206	K206k	kQEPVAGK	0	-0.861575	0.0755744	0.239775	0.184717	0.64666	0.882134	0.965925	0.185351	0.308866	-0.764188	0.324225	0.57749	0.4043	-0.5286	0.6372	-0.0072	0.6385	-0.7098	-0.479	0.5786	1.3974	NA	NA	-0.3404	-1.0048	-0.134	0.0066
A0A0R4IHV1_K114k_1_1_114_114	A0A0R4IHV1	A0A0R4IHV1	pkmb	K114k	EAIESFGAGTIDYRPVAIALDTkGPEIR	0	-0.097475	0.902914	0.954551	-0.812833	0.181686	0.521663	1.65088	2.03414e-05	0.0010116	1.04584	0.00212331	0.0281084	0.2238	-1.0716	-0.0023	-0.9746	-1.4262	0.3753	-0.2103	NA	NA	-0.3587	NA	NA	-0.667	0.87	0.9743
A0A0R4IHV1_K124k_1_1_124_124	A0A0R4IHV1	A0A0R4IHV1	pkmb	K124k	TGLIkGSGTEEVK	0	-0.717192	0.0746547	0.238173	0.0307	0.935484	0.989668	1.65088	2.03414e-05	0.0010116	1.04584	0.00212331	0.0281084	0.1919	-0.7057	-0.3419	0.2192	0.4816	0.0156	-0.5638	0.6347	1.2662	-0.2267	NA	0.4439	-0.2358	-0.0752	-0.3445
A0A0R4IHV1_K183k_1_1_183_183	A0A0R4IHV1	A0A0R4IHV1	pkmb	K183k	VVQQGSHIYVDDGLISLkVK	0	-0.362558	0.0955309	0.27169	-0.780633	0.00176072	0.0429124	1.65088	2.03414e-05	0.0010116	1.04584	0.00212331	0.0281084	-0.2667	-0.0322	-0.1474	-0.3746	-0.1405	-0.0407	-0.4513	0.3344	0.1962	-0.0586	NA	0.6721	0.6662	0.4313	0.5096
A0A0R4IHV1_K205k_1_1_205_205	A0A0R4IHV1	A0A0R4IHV1	pkmb	K205k	EIGSDFLNCEIENGGMLGSkK	0	-0.1613	0.530675	0.714389	-0.865558	0.00607455	0.0873745	1.65088	2.03414e-05	0.0010116	1.04584	0.00212331	0.0281084	0.0035	-0.3587	-0.1272	-0.3174	0.2286	-0.335	-0.0956	0.1677	0.4933	-0.0634	-0.7522	0.8887	0.6032	1.0214	0.6796
A0A0R4IHV1_K206k_1_1_206_206	A0A0R4IHV1	A0A0R4IHV1	pkmb	K206k	kGVNLPGANVDLPAVSEK	0	-1.02523	0.000881266	0.0185441	-0.773425	0.00680266	0.0934975	1.65088	2.03414e-05	0.0010116	1.04584	0.00212331	0.0281084	-0.4494	-0.3301	-0.0411	-0.6311	0.2164	-0.6286	-0.408	0.7005	0.7684	0.518	NA	0.5691	0.2657	0.4255	0.7398
A0A0R4IHV1_K269k_1_1_269_269	A0A0R4IHV1	A0A0R4IGP6|Q7ZVT2|A0A0R4IHV1	pkmb	K269k	IISkLENHEGVR	0	-0.387425	0.185013	0.38746	-0.320567	0.304061	0.649655	1.65088	2.03414e-05	0.0010116	1.04584	0.00212331	0.0281084	-0.6184	-0.5499	-0.3323	-0.2817	0.3413	-0.0241	0.1791	0.209	0.6698	-0.9594	-0.152	0.5682	0.639	0.4169	0.3199
A0A0R4IHV1_K321k_1_1_321_321	A0A0R4IHV1	A0A0R4IHV1	pkmb	K321k	IGkPIICATQMLESMIK	0	-1.19417	0.145116	0.339893	-0.866017	0.123944	0.435885	1.65088	2.03414e-05	0.0010116	1.04584	0.00212331	0.0281084	0.3659	-0.7345	-0.198	0.2635	-0.6224	-1.3804	-0.2228	NA	NA	NA	1.1184	-0.3855	-1.1597	1.0136	1.0282
A0A0R4IHV1_K432k_1_1_432_432	A0A0R4IHV1	A0A0R4IHV1	pkmb	K432k	CCASAIICLTkTGR	0	-0.982258	0.0210531	0.117067	-1.26693	0.00474245	0.0761699	1.65088	2.03414e-05	0.0010116	1.04584	0.00212331	0.0281084	-1.0005	-1.4237	-1.4032	-0.1759	-0.2407	-0.4282	-0.4763	0.4686	0.4877	-1.012	NA	0.955	0.6523	1.2274	0.7061
A0A0R4IHV6_K146k_1_1_146_146	A0A0R4IHV6	B0S7K9|A0A0R4IHV6|A0AUR9	gps1	K146k	LDTDLkNYK	0	2.0369	1.20311e-07	0.000475952	0.411233	0.102006	0.399909	0.437219	0.000475119	0.00628797	0.225997	0.0447879	0.183819	1.4358	1.3991	1.2998	1.3437	-0.2246	-0.1992	-0.3147	-0.5283	-0.3501	-0.9619	-0.8289	-0.1764	-0.4835	-0.967	-1.0027
A0A0R4IHV6_K154k_1_1_154_154	A0A0R4IHV6	B0S7K9|A0A0R4IHV6|A0AUR9	gps1	K154k	GNSIkESIR	0	-0.681592	0.0708756	0.232491	-0.982525	0.0136639	0.144644	0.437219	0.000475119	0.00628797	0.225997	0.0447879	0.183819	0.3465	-0.395	0.8425	-0.7961	-0.5345	-1.0816	-0.7329	0.5975	0.8429	0.6028	NA	0.5815	-0.2857	0.3612	0.1411
A0A0R4IHV6_K484k_1_1_484_484	A0A0R4IHV6	B0S7K9|A0A0R4IHV6	gps1	K484k	NQIHVkSPPR	0	-0.944025	0.00836676	0.069253	-0.172592	0.584175	0.847651	0.437219	0.000475119	0.00628797	0.225997	0.0447879	0.183819	-1.0777	-1.4926	-0.0881	-0.9605	0.1941	-0.0531	0.2239	0.0344	0.2927	-0.2092	NA	0.7275	0.4164	0.0528	-0.0198
A0A0R4IHZ5_K371k_1_1_371_371	A0A0R4IHZ5	A0A0R4IHZ5|A0A0R4ITI5|A0A0R4IHN8	hnrnpr	K371k	TFSQFGkLER	0	0.08525	0.699717	0.833395	0.203808	0.397848	0.729636	0.293277	0.0053209	0.027891	0.130898	0.189922	0.427814	0.0665	0.3918	0.4392	0.593	0.2704	0.006	0.1299	0.6568	0.5081	0.1601	-0.1755	-0.2537	-0.2068	0.1027	0.0843
A0A0R4II06_K2507k_1_1_2507_2507	A0A0R4II06	A0A0R4IXL3|A0A0R4II06	si:dkey-151j17.4	K2507k	TGSTDkDDIAFHFNPR	0	-0.603442	0.108484	0.290958	-0.329892	0.364601	0.701919	0.697182	0.0323104	0.0931422	-0.223311	0.489305	0.717715	0.2951	-0.2903	0.2521	-0.5212	0.2782	-0.5049	-0.5625	-0.0053	0.2154	NA	1.402	0.3516	0.0549	-0.2747	0.1355
A0A0R4II06_K494k_1_1_494_494	A0A0R4II06	A0A0R4II06|A0A0R4IPJ7	si:dkey-151j17.4	K494k	EQCIFkHR	0	-0.3745	0.380669	0.590547	0.74785	0.0921211	0.383313	0.697182	0.0323104	0.0931422	-0.223311	0.489305	0.717715	0.3368	0.0249	-1.5076	-0.4737	1.2919	0.2622	-0.1099	-0.2271	0.4695	NA	-0.3336	-0.3383	-0.3099	-0.1228	-0.2948
A0A0R4II06_K633k_1_1_633_633	A0A0R4II06	A0A0R4II06|A0A0R4IPJ7	si:dkey-151j17.4	K633k	ELCTFkHR	0	0.1573	0.674636	0.816829	0.700258	0.0616871	0.317681	0.697182	0.0323104	0.0931422	-0.223311	0.489305	0.717715	-0.6208	NA	-0.7543	-1.3577	1.4077	0.3762	0.1053	-1.2147	-0.5602	-1.4298	NA	0.231	-0.2355	0.1147	-0.3923
A0A0R4II16_K143k_1_0_142_143	A0A0R4II16	A0A0R4II16	psmf1	K143k	SSLLPSKkEER	1	-0.8449	0.00502941	0.0521672	0.402817	0.168125	0.503617	-0.522	0.00087002	0.00900109	0.0458928	0.731193	0.877792	0.3368	1.1284	0.9178	0.1782	-0.2711	-0.0404	-0.687	1.3679	1.2419	1.5724	1.7586	-0.3157	-1.0312	-0.6875	-0.9082
A0A0R4II89_K306k_1_1_306_306	A0A0R4II89	Q9PT92|A0A0R4II89|A0A0R4IGK9	cat	K306k	VWSHkEFPLIPVGR	0	-0.7074	0.0302206	0.143521	-0.472283	0.159867	0.493981	-0.984867	0.000809798	0.00854532	0.00888239	0.971565	0.987224	-0.1865	-0.2729	0.3053	-0.0419	-0.4395	-0.7258	0.0432	1.0343	1.2333	0.3165	0.0495	0.6039	0.1227	0.0215	-0.3551
A0A0R4II89_K424k_1_1_424_424	A0A0R4II89	Q9PT92|A0A0R4II89|A0A0R4IGK9	cat	K424k	CkVSPDVAR	0	-0.7364	0.0326934	0.149354	0.0668917	0.84587	0.956096	-0.984867	0.000809798	0.00854532	0.00888239	0.971565	0.987224	0.3787	0.0217	0.1183	0.949	0.2864	0.8766	-0.2076	0.2728	1.2131	1.5735	1.3539	0.0417	0.4886	0.3929	0.0831
A0A0R4II97_K101k_1_1_101_101	A0A0R4II97	A0A0R4II97|Q568Q7|Q1RLQ1	A0A0R4II97_K101k_1_1_101_101	K101k	MAEEkLNQK	0	-0.132475	0.7001	0.833395	0.198575	0.59382	0.851623	-1.56073	0.036712	0.101939	-0.213671	0.772305	0.899061	0.4359	-0.1455	0.7122	-0.2043	0.2952	0.7629	-0.3438	0.1835	0.3427	0.5361	0.2659	0.3787	0.7007	-0.8971	-0.0242
A0A0R4II97_K105k_1_1_105_105	A0A0R4II97	A0A0R4II97|Q568Q7|Q1RLQ1	A0A0R4II97_K105k_1_1_105_105	K105k	LNQkMEANK	0	-0.34685	0.405608	0.61127	0.82425	0.079218	0.358269	-1.56073	0.036712	0.101939	-0.213671	0.772305	0.899061	-0.4768	0.4894	0.3898	0.0322	0.2203	1.4488	-0.3761	-0.0512	0.2508	0.8183	0.8041	-0.3823	0.491	-0.5215	-1.1602
A0A0R4IIH0_K226k_1_1_226_226	A0A0R4IIH0	A0A0R4IIH0|A3KNV8	ubfd1	K226k	LEQDQLWIGTkER	0	-0.491425	0.0256406	0.131738	0.718317	0.00435595	0.0730406	0.138741	0.163749	0.284503	-0.23563	0.037323	0.163782	0.2502	0.4951	0.3101	0.5032	0.3006	0.5418	0.1166	0.6466	0.5705	1.0926	1.2146	-0.3819	-0.5345	-0.3311	-0.3471
A0A0R4IIH0_K286k_1_1_286_286	A0A0R4IIH0	A0A0R4IIH0|A3KNV8	ubfd1	K286k	DTVLGkWQYF	0	1.38982	0.00470242	0.0510392	0.481992	0.203994	0.5461	0.138741	0.163749	0.284503	-0.23563	0.037323	0.163782	0.0402	-0.7576	-0.49	0.2059	0.2293	0.6187	0.8085	-1.5847	-1.6957	NA	NA	-0.8273	0.7589	-0.0605	0.4096
A0A0R4IJ30_K534k_1_0_534_542	A0A0R4IJ30	A0A2R8Q487|A0A0R4IJ30|A0A2R8Q0F5	opa1	K534k	SIVTDLVSQMDPQGkRTIFVLTK	1	1.0662	0.0197542	0.112831	-1.0661	0.0389521	0.245176	0.340775	0.00302316	0.019308	0.154471	0.150201	0.374382	0.4748	0.2233	0.5314	-0.1332	-0.824	0.5534	0.0027	-1.6979	-1.3023	-0.5747	0.4064	NA	1.2353	0.9408	0.7543
A0A0R4IJ49_K30k_1_1_30_30	A0A0R4IJ49	A0A0R4IJ49|E9QHH0|Q6PBW7	rps19	K30k	ALAAFLkK	0	NA	NA	NA	1.6072	0.052022	0.288079	0.133444	0.660007	0.759666	0.183572	0.576218	0.784944	NA	-0.3848	NA	NA	NA	0.5952	NA	NA	NA	NA	NA	NA	-1.012	NA	NA
A0A0R4IJ49_K36k_1_1_36_36	A0A0R4IJ49	A0A0R4IJ49|E9QHH0|Q6PBW7	rps19	K36k	LkVPDWVDIVK	0	0.005275	0.990451	0.993716	-0.0518	0.913368	0.984531	0.133444	0.660007	0.759666	0.183572	0.576218	0.784944	-0.1848	-0.3127	0.4023	-1.0916	0.3457	0.6699	-0.9175	-0.2282	-0.5889	-0.6213	0.2305	1.0054	0.4887	-0.7381	-0.418
A0A0R4IJP7_K707k_1_1_707_707	A0A0R4IJP7	A0A0R4ISB0|A0A0R4IJP7	znf185	K707k	LLEEIkTTIK	0	NA	NA	NA	-0.567492	0.133785	0.456326	0.262815	0.143254	0.259949	-0.250102	0.193036	0.431457	NA	NA	NA	NA	-0.755	0.0123	-1.0899	NA	NA	NA	NA	0.0117	-0.4824	0.4857	-0.1885
A0A0R4IJP7_K817k_1_1_817_817	A0A0R4IJP7	A0A0R4ISB0|A0A0R4IJP7	znf185	K817k	LVEEIkTTIK	0	NA	NA	NA	-0.3246	0.397743	0.729636	0.262815	0.143254	0.259949	-0.250102	0.193036	0.431457	NA	NA	NA	NA	-0.4977	-0.415	NA	NA	NA	NA	NA	0.1383	-0.5543	0.4153	-0.5263
A0A0R4IJT8_K326k_1_1_326_326	A0A0R4IJT8	A0A0R4IJT8|Q7ZU96	cct8	K326k	LCkTVGATALPR	0	-0.250575	0.178118	0.381261	-0.0996083	0.61073	0.862154	0.326584	0.0368506	0.102191	0.0645973	0.676724	0.846838	0.2091	0.4359	0.4241	0.2529	0.266	-0.0929	-0.0229	0.6803	0.5545	0.5313	0.5582	0.2457	0.299	-0.1256	0.1796
A0A0R4IJT8_K537k_1_1_537_537	A0A0R4IJT8	A0A0R4IJT8	cct8	K537k	APkQQGHWDK	0	0.46825	0.127031	0.313888	-0.008925	0.977638	0.993758	0.326584	0.0368506	0.102191	0.0645973	0.676724	0.846838	0.863	0.2436	0.6171	0.5659	-0.1414	0.005	0.2909	0.5521	0.5858	-0.6841	-0.0372	-0.5117	0.2138	0.1764	0.3632
A0A0R4IK14_K32k_1_1_32_32	A0A0R4IK14	A0A0R4IK14	sh3d21	K32k	AkEEGWLEGDLR	0	-0.9554	0.00680017	0.0611398	-0.526875	0.130402	0.449175	-0.108843	0.420208	0.552437	-0.197854	0.184807	0.422205	-0.5093	-0.9222	-0.5827	-0.4874	0.0601	0.045	-0.5848	0.6873	0.5461	0.4556	-0.369	1.1995	0.3093	0.0833	-0.1242
A0A0R4IKD0_K158k_1_1_158_158	A0A0R4IKD0	A0A0R4IKD0	rsu1	K158k	LAkLQILSLR	0	-0.28875	0.52342	0.710088	-0.55425	0.230994	0.581928	0.255289	0.0705926	0.15955	-0.0211883	0.881913	0.948677	-0.2697	-0.2052	-0.242	-0.6567	0.2058	-0.6312	NA	0.3461	-0.4554	NA	NA	0.603	0.8893	-0.7323	0.6062
A0A0R4IKE0_K176k_1_1_176_176	A0A0R4IKE0	A0A0R4IKE0|F1QNI9	casq1a	K176k	LVGFFkSAK	0	0.5113	0.262334	0.475063	0.878967	0.0397537	0.247596	1.0369	2.69041e-05	0.00121067	0.59047	0.00530718	0.0482331	0.2033	0.1921	-0.5549	0.7293	-0.0442	0.7348	0.5585	NA	-0.4797	-0.258	NA	0.0792	-1.4684	-0.2509	-0.2103
A0A0R4IKF0_K224k_1_1_224_224	A0A0R4IKF0	A0A0R4IKF0	apoa1b	K224k	VkSGELRK	0	1.7396	0.00125268	0.0232657	2.35794	0.000166516	0.0112586	0.383073	0.187469	0.310588	0.0496203	0.86998	0.942445	1.6943	1.4074	0.2616	1.1317	-0.7607	1.3041	-0.2189	0.0246	-0.1317	-1.4147	-0.9416	-2.5788	-1.8731	-2.1443	-2.4029
A0A0R4IKF0_K252k_1_1_252_252	A0A0R4IKF0	A0A0R4IKF0	apoa1b	K252k	ALQkFASKE	0	0.196425	0.559255	0.734777	0.9265	0.0197236	0.175918	0.383073	0.187469	0.310588	0.0496203	0.86998	0.942445	1.3245	0.9961	-0.0271	0.4954	-0.0727	0.8796	-0.0668	0.7554	0.358	0.6037	0.2861	-1.3262	-0.4131	-0.8039	-0.176
A0A0R4IKG8_K415k_1_1_415_415	A0A0R4IKG8	A0A0R4IKG8	si:ch211-217a12.1	K415k	IHLPPkAILK	0	0.0120417	0.976132	0.989969	-0.0186167	0.963109	0.991969	0.0257035	0.909888	0.942277	-0.503592	0.0567447	0.21405	0.2957	-0.2832	-0.6501	-0.3233	0.3917	0.152	-0.0873	-0.9881	0.2968	-0.0655	NA	1.224	-0.3602	-0.285	0.1042
A0A0R4IKG8_K466k_1_1_466_466	A0A0R4IKG8	A0A0R4IKG8	si:ch211-217a12.1	K466k	MTILPLkDK	0	-0.53405	0.367438	0.579955	-0.250333	0.575683	0.843319	0.0257035	0.909888	0.942277	-0.503592	0.0567447	0.21405	-0.4902	NA	0.3379	NA	-0.4216	-0.6337	-0.4808	NA	0.7042	0.2116	NA	0.6042	-0.2484	-1.489	0.0864
A0A0R4IKG8_K69k_1_1_69_69	A0A0R4IKG8	A0A0R4IKG8	si:ch211-217a12.1	K69k	ANIGDCHAMGQkPITFFR	0	0.0901	0.906933	0.956244	-0.0559917	0.9153	0.984987	0.0257035	0.909888	0.942277	-0.503592	0.0567447	0.21405	0.0835	-0.8579	-0.3556	-0.2652	0.1789	-0.0744	-0.3603	NA	-0.4389	NA	NA	-0.0867	-1.6677	0.636	1.0013
A0A0R4IKI3_K198k_1_1_198_198	A0A0R4IKI3	A0A2R8RV27|A0A0R4IKI3|A0A2R8QU90|A0A2R8QTG3	A0A0R4IKI3_K198k_1_1_198_198	K198k	QkTDLTDK	0	-0.3729	0.744128	0.86556	-0.515883	0.609741	0.862068	-0.135324	0.155898	0.274044	0.0399162	0.687341	0.853089	-5.4953	-1.083	-4.4043	-1.4734	-1.3647	-1.5089	-0.269	-1.1516	-4.3306	NA	NA	-1.2452	-0.2637	-0.6992	0.0815
A0A0R4IKJ0_K90k_1_1_90_90	A0A0R4IKJ0	A0A0R4IKJ0	myl10	K90k	LkGTDPEETILNAFK	0	NA	NA	NA	-0.14815	0.709972	0.905302	0.19753	0.232893	0.362694	-0.0809826	0.642591	0.83045	0.3201	NA	-0.1078	0.7555	-0.0514	0.0131	-0.907	NA	NA	NA	NA	-0.2353	-0.0986	NA	NA
A0A0R4IL71_K287k_1_1_287_287	A0A0R4IL71	A0A0R4IL71	ide	K287k	VVPIkDIR	0	0.5649	0.0677815	0.22817	0.256192	0.384666	0.717902	-0.163421	0.226233	0.355493	-0.117409	0.413298	0.656987	1.0205	0.8161	0.7167	1.2171	0.0215	-0.0421	0.1408	0.6149	-0.179	0.6972	NA	-0.4377	-0.539	0.4549	-0.3427
A0A0R4IL71_K537k_1_1_537_537	A0A0R4IL71	A0A0R4IL71	ide	K537k	DTAMSkVWFK	0	0.72635	0.113382	0.297282	0.534008	0.180569	0.520663	-0.163421	0.226233	0.355493	-0.117409	0.413298	0.656987	0.0063	0.5366	-0.6299	0.8356	-0.0532	1.0553	0.4647	-0.7694	-0.309	NA	NA	-0.623	-0.0223	0.3531	0.1119
A0A0R4IL71_K847k_1_1_847_847	A0A0R4IL71	A0A0R4IL71	ide	K847k	VEAFLkTMEK	0	-0.507767	0.354423	0.569033	0.0875167	0.846044	0.956096	-0.163421	0.226233	0.355493	-0.117409	0.413298	0.656987	-0.8241	NA	NA	-0.4767	-0.5013	0.2763	0.5822	-0.2167	-0.8778	0.6666	NA	0.8485	0.1725	-0.825	-0.0698
A0A0R4IL71_K997k_1_1_997_997	A0A0R4IL71	A0A0R4IL71	ide	K997k	PHINFMAAkL	0	1.8835	0.0952706	0.271144	1.49483	0.0798243	0.358269	-0.163421	0.226233	0.355493	-0.117409	0.413298	0.656987	0.5917	NA	0.0907	0.7687	NA	0.6818	0.6173	NA	-1.3998	NA	NA	-2.2692	-2.0541	0.4516	0.4906
A0A0R4ILA8_K113k_1_1_113_113	A0A0R4ILA8	F1QUQ7|A0A0R4ILA8	psmc3	K113k	CAVIkTSTR	0	0.524925	0.139671	0.331299	0.391733	0.298278	0.646526	0.438131	0.0105225	0.0433618	0.288951	0.0909891	0.279551	0.3522	0.4072	0.1356	0.2978	-0.077	0.7141	0.4256	-0.0952	0.0914	0.484	-1.3871	0.219	0.1581	-0.5517	0.0246
A0A0R4ILA8_K134k_1_1_134_134	A0A0R4ILA8	F1QUQ7|A0A0R4ILA8	psmc3	K134k	LkPGDLVGVNK	0	0.303675	0.629439	0.78341	-0.241983	0.721381	0.909899	0.438131	0.0105225	0.0433618	0.288951	0.0909891	0.279551	-0.1709	-0.3249	-0.0735	-0.4602	0.3957	0.26	-0.3675	0.9109	0.4489	-0.3865	-3.2175	0.4364	0.2539	0.1832	0.4787
A0A0R4ILA8_K161k_1_1_161_161	A0A0R4ILA8	F1QUQ7|A0A0R4ILA8	psmc3	K161k	VkAMEVDERPTEQYSDIGGLDK	0	-0.0925	0.662948	0.810148	0.31205	0.185154	0.525501	0.438131	0.0105225	0.0433618	0.288951	0.0909891	0.279551	0.5722	0.5824	0.0188	0.0127	0.2284	0.3902	0.228	0.5013	0.3356	0.5171	0.2021	0.028	0.3029	-0.2504	-0.1999
A0A0R4ILA8_K197k_1_1_197_197	A0A0R4ILA8	F1QUQ7|A0A0R4ILA8	psmc3	K197k	QIQELVEAIVLPMNHkEK	0	NA	NA	NA	0.2042	0.704341	0.903242	0.438131	0.0105225	0.0433618	0.288951	0.0909891	0.279551	NA	NA	NA	NA	NA	NA	-0.2813	NA	NA	NA	NA	NA	-0.7698	NA	-0.2012
A0A0R4ILA8_K264k_1_0_264_266	A0A0R4ILA8	F1QUQ7|A0A0R4ILA8	psmc3	K264k	DAFALAkEK	1	-0.50655	0.13794	0.32873	-0.540708	0.0779525	0.356633	0.438131	0.0105225	0.0433618	0.288951	0.0909891	0.279551	0.0398	0.2282	0.1189	-0.0221	0.1613	-0.8965	-0.1991	0.5215	0.674	NA	NA	0.1113	-0.1731	0.7557	0.2232
A0A0R4ILA8_K288k_1_1_288_288	A0A0R4ILA8	F1QUQ7|A0A0R4ILA8	psmc3	K288k	RFDSEkAGDREVQR	0	-0.231675	0.328021	0.543405	0.723258	0.010473	0.120122	0.438131	0.0105225	0.0433618	0.288951	0.0909891	0.279551	0.2798	0.1727	0.6413	0.1273	0.7434	0.3142	0.1164	0.3554	0.1754	0.6158	1.0012	-0.1995	-0.3697	-0.5945	-0.164
A0A0R4ILA8_K41k_1_1_41_41	A0A0R4ILA8	F1QUQ7|A0A0R4ILA8	psmc3	K41k	LLDSEIkIMK	0	-0.476642	0.0550212	0.204957	-0.200083	0.394568	0.725769	0.438131	0.0105225	0.0433618	0.288951	0.0909891	0.279551	-0.2277	-0.2611	0.0183	-0.4694	0.1956	-0.266	0.1801	0.2019	0.505	0.0181	NA	0.5186	0.0998	0.0035	0.3247
A0A0R4ILA8_K44k_1_1_44_44	A0A0R4ILA8	F1QUQ7|A0A0R4ILA8	psmc3	K44k	IMkSEVLR	0	1.84803	0.0105186	0.0781111	0.586458	0.40444	0.73168	0.438131	0.0105225	0.0433618	0.288951	0.0909891	0.279551	0.445	0.8996	0.6342	0.5348	0.6299	0.2882	0.7731	-1.6685	-0.1636	0.6645	-3.7109	0.0441	0.137	-0.1731	-0.0989
A0A0R4ILA8_K58k_1_1_58_58	A0A0R4ILA8	F1QUQ7|A0A0R4ILA8	psmc3	K58k	VTHELQAMkDK	0	0.0469	0.851886	0.926859	-0.0971083	0.720828	0.909606	0.438131	0.0105225	0.0433618	0.288951	0.0909891	0.279551	0.2166	0.8366	-0.199	-0.1485	0.0757	-0.0034	0.2831	0.1745	0.1489	0.3349	-0.1402	0.617	0.2854	0.0143	-0.0544
A0A0R4ILA8_K67k_1_1_67_67	A0A0R4ILA8	F1QUQ7|A0A0R4ILA8	psmc3	K67k	ENTEkIK	0	-0.0313083	0.939515	0.973932	1.55934	0.00175933	0.0429124	0.438131	0.0105225	0.0433618	0.288951	0.0909891	0.279551	-0.092	0.2576	0.0244	0.2461	0.4281	-0.1522	1.227	NA	-0.5502	0.0365	0.9347	-1.568	-1.4987	-0.8837	-0.2831
A0A0R4IM03_K344k_1_1_344_344	A0A0R4IM03	A0A0R4IM03	si:ch73-18b11.1	K344k	ELEEkVMELHK	0	-0.092575	0.674106	0.816829	-0.581075	0.02482	0.19856	0.0883512	0.40499	0.537848	0.0563537	0.619729	0.812573	0.2442	0.033	-0.0178	0.3879	-0.1503	-0.0318	-0.1578	-0.2317	0.5374	0.6368	0.0751	0.6997	0.4254	0.3177	0.4283
A0A0R4IM03_K468k_1_1_468_468	A0A0R4IM03	A0A0R4IM03|E7F9M7	si:ch73-18b11.1	K468k	LTSPEQPTkSK	0	-0.194142	0.593322	0.758134	0.542242	0.149104	0.477496	0.0883512	0.40499	0.537848	0.0563537	0.619729	0.812573	-1.169	-0.1512	-0.4422	-0.5155	0.5046	0.861	0.2021	-0.3726	-0.749	-0.0044	NA	0.6808	-0.7503	-0.3649	0.3557
A0A0R4IM03_K477k_1_1_477_477	A0A0R4IM03	A0A0R4IM03|F1Q8U6	si:ch73-18b11.1	K477k	FLTLGSkFR	0	-0.478525	0.243705	0.457396	0.505192	0.219682	0.565941	0.0883512	0.40499	0.537848	0.0563537	0.619729	0.812573	-0.1557	0.2981	0.6375	0.0896	-0.1566	0.0558	0.0104	1.0105	0.0933	0.9839	NA	-0.4317	-0.2644	-1.7117	0.2665
A0A0R4IM99_K149k_1_1_149_149	A0A0R4IM99	A0A0R4IMN8|Q1LXM2|F1R412|A0A0R4IM99	A0A0R4IM99_K149k_1_1_149_149	K149k	MEIQEMQLkEAK	0	-0.234475	0.263242	0.47617	-0.199492	0.374386	0.711012	-0.350504	0.224471	0.353333	-0.190414	0.532205	0.752109	-0.1281	0.3826	0.0104	0.0792	0.4696	0.4274	0.058	0.4985	0.2846	0.3272	0.1717	0.7781	0.7198	0.3056	0.2678
A0A0R4IM99_K205k_1_1_205_205	A0A0R4IM99	Q1LXM2|A0A2R8Q7U4|F1R412|A0A0R4IM99	A0A0R4IM99_K205k_1_1_205_205	K205k	NVTNNLkSLEAQAEK	0	0.97955	0.000584467	0.0147345	0.633017	0.020343	0.177554	-0.350504	0.224471	0.353333	-0.190414	0.532205	0.752109	0.313	0.6893	0.0893	0.8366	0.2499	0.5733	0.7367	-0.5939	-0.5647	-0.4582	-0.3732	-0.187	0.3638	-0.3783	-0.2507
A0A0R4IM99_K213k_1_1_213_213	A0A0R4IM99	A0A0R4IM99|Q6IQD7	A0A0R4IM99_K213k_1_1_213_213	K213k	SLEAQAEkYSTK	0	1.857	0.000180269	0.00745152	1.28514	0.00363514	0.0665725	0.317478	0.0850847	0.180669	0.560534	0.00943316	0.0703424	0.6151	0.0837	0.3759	1.1741	0.0874	0.6496	1.1901	-0.7289	-1.591	-1.5645	NA	-1.3948	-0.2791	-0.26	-0.6372
A0A0R4IM99_K37k_1_1_37_37	A0A0R4IM99	A0A0R4INL7|A0A0R4IM99|Q6IQD7	A0A0R4IM99_K37k_1_1_37_37	K37k	CkQLEEELLALQK	0	0.429725	0.273007	0.483877	0.697058	0.108029	0.410741	0.317478	0.0850847	0.180669	0.560534	0.00943316	0.0703424	0.6139	0.8604	0.7441	0.6841	0.0877	-0.7506	0.8193	1.0402	0.6228	0.1886	-0.668	-0.0422	-0.9725	-1.1084	-0.4566
A0A0R4IM99_K48k_1_1_48_48	A0A0R4IM99	A0A0R4INL7|A0A0R4IM99|Q6IQD7	A0A0R4IM99_K48k_1_1_48_48	K48k	QLEEELLALQkK	0	-0.615175	0.103088	0.283008	-0.683817	0.0942612	0.388659	0.317478	0.0850847	0.180669	0.560534	0.00943316	0.0703424	-0.6424	0.2706	0.059	-0.6407	0.519	-1.167	-0.1484	0.9941	0.4281	-0.1067	0.1917	0.8111	0.1619	0.1484	0.552
A0A0R4IM99_K51k_1_1_51_51	A0A0R4IM99	A0A0R4INL7|A0A0R4IM99|Q6IQD7	A0A0R4IM99_K51k_1_1_51_51	K51k	LkGVEDELDK	0	-0.009775	0.976338	0.989969	0.0973	0.768163	0.931683	0.317478	0.0850847	0.180669	0.560534	0.00943316	0.0703424	-0.1078	0.0746	0.1171	0.4746	0.0583	-0.8487	0.2291	0.1781	0.2539	0.0162	NA	0.3573	-0.0018	-0.8423	-0.6508
A0A0R4IM99_K59k_1_1_59_59	A0A0R4IM99	A0A0R4INL7|A0A0R4IM99|Q6IQD7	A0A0R4IM99_K59k_1_1_59_59	K59k	GVEDELDkYSESLK	0	-0.204775	0.623807	0.779463	-0.192483	0.6692	0.892861	0.317478	0.0850847	0.180669	0.560534	0.00943316	0.0703424	-0.0592	-0.0457	0.1018	-0.6419	1.156	-1.0141	-0.0682	0.6965	0.3082	-0.1812	-0.6494	0.6012	-0.1305	-0.2155	0.613
A0A0R4IM99_K5k_1_1_5_5	A0A0R4IM99	F1R412|A0A0R4IM99|F1QKG7|Q6IQD7	A0A0R4IM99_K5k_1_1_5_5	K5k	MEAIkK	0	0.756175	0.0143887	0.0942843	0.740283	0.0241428	0.196521	0.317478	0.0850847	0.180669	0.560534	0.00943316	0.0703424	0.7027	0.8076	0.7516	1.1094	-0.1761	-0.4145	0.8055	0.6511	-0.0294	0.0125	-0.2876	-0.3998	-0.6744	-0.6988	-0.9016
A0A0R4IM99_K65k_1_1_65_65	A0A0R4IM99	A0A0R4INL7|A0A0R4IM99|Q6IQD7	A0A0R4IM99_K65k_1_1_65_65	K65k	YSESLkDAQEK	0	1.59795	0.00312565	0.0392542	-0.49385	0.330878	0.676935	0.317478	0.0850847	0.180669	0.560534	0.00943316	0.0703424	-0.6451	-0.7843	-1.274	-0.035	0.079	-0.1828	-0.0135	-2.2855	-0.6822	-2.7137	-3.4488	0.7462	0.9024	0.2441	-0.0737
A0A0R4IM99_K70k_1_1_70_70	A0A0R4IM99	A0A0R4INL7|A0A0R4IM99|Q6IQD7	A0A0R4IM99_K70k_1_1_70_70	K70k	DAQEkLEQAEK	0	-1.05759	0.142161	0.335956	-1.50891	0.0434663	0.260301	0.317478	0.0850847	0.180669	0.560534	0.00943316	0.0703424	-1.7985	-1.3373	-1.1956	-2.3599	-0.2591	-3.1384	-0.6334	0.2408	-0.3001	-1.7864	NA	1.123	0.2999	-1.0841	0.3223
A0A0R4IMM3_K396k_1_1_396_396	A0A0R4IMM3	Q6PBY7|A0A0R4IMM3	trappc13	K396k	LTDTFLkR	0	-0.312875	0.219266	0.42875	0.0729667	0.785722	0.940533	0.722397	0.000850706	0.00884456	0.817564	0.000583775	0.0126771	0.4548	0.6916	0.1308	0.8518	0.2875	0.0487	0.3468	0.4016	0.8045	0.6986	1.4758	0.398	0.1959	0.1105	-0.0856
A0A0R4IMR9_K374k_1_1_374_374	A0A0R4IMR9	Q5TZ57|A0A0R4IMR9|Q7ZW35	fam49a	K374k	HLNDESTPkNIR	0	-0.4518	0.131928	0.320849	0.00466667	0.988047	0.995345	0.137728	0.403294	0.536204	0.133456	0.452176	0.688415	0.1094	-0.335	0.6979	-0.5721	0.3804	-0.1378	-0.1113	0.3682	-0.0612	0.6266	0.7738	-0.2732	-0.0743	0.2904	0.2135
A0A0R4IMS3_K131k_1_1_131_131	A0A0R4IMS3	Q8JGR4|A0A0R4IMS3	rpl24	K131k	QTTQSSkAPAK	0	-0.7952	0.134666	0.323858	0.539267	0.161925	0.496919	0.751959	0.0129091	0.0498901	0.533714	0.080671	0.263678	0.1816	0.468	-0.7819	-0.6745	-0.5573	0.0102	-0.1677	0.5935	NA	NA	NA	-0.5539	-1.0292	NA	-0.7495
A0A0R4IMS3_K69k_1_1_69_69	A0A0R4IMS3	Q8JGR4|A0A0R4IMS3	rpl24	K69k	GQSEEVSkK	0	1.4303	0.00419008	0.047225	1.06789	0.0116649	0.130398	0.751959	0.0129091	0.0498901	0.533714	0.080671	0.263678	0.834	0.5182	-0.534	0.9612	0.0064	0.6965	-0.1462	-0.9579	-1.013	NA	NA	-0.8838	-0.3932	-1.3729	-0.8794
A0A0R4IMW9_K121k_1_1_121_121	A0A0R4IMW9	A0A0R4IMW9|E7EZP3	sox13	K121k	LLNTDWkEK	0	-0.0478	0.889878	0.94872	0.302408	0.422338	0.742946	-0.738877	0.0665748	0.153589	0.456256	0.272662	0.52533	-0.3073	-0.6026	-0.4007	-0.0416	0.3907	1.4371	0.0737	-0.243	-0.5099	-0.6243	0.2162	1.1359	0.5082	-0.1282	-0.1902
A0A0R4IMY9_K201k_1_1_201_201	A0A0R4IMY9	A0A0R4IMY9|F1RBV6|A0A0R4IAV8	dtnba	K201k	SCFPQQkK	0	0.0493	0.870979	0.936557	0.374783	0.26301	0.613827	0.502989	0.00386357	0.0223158	0.309493	0.0666915	0.235201	0.268	0.5203	0.3963	-0.01	0.4879	-0.5801	0.8663	0.6256	0.3888	0.2011	-0.2381	-0.0809	-0.5664	0.1203	0.06
A0A0R4IMY9_K304k_1_1_304_304	A0A0R4IMY9	A0A0R4IMY9|F1RBV6	dtnba	K304k	AISkSLGCVPSREPSHPIYPEYPEK	0	0.921467	0.00570576	0.0560098	0.336875	0.253593	0.604102	0.502989	0.00386357	0.0223158	0.309493	0.0666915	0.235201	-0.1012	0.2009	-0.0431	0.1074	0.3403	0.4153	0.5458	-0.5333	-0.4201	-1.688	NA	0.335	-0.1439	-0.0446	0.2412
A0A0R4IMY9_K427k_1_1_427_427	A0A0R4IMY9	A0A0R4IMY9|F1RBV6|A0A0R4IAV8	dtnba	K427k	LATDPGHTARPADFSYDTNkQQR	0	1.00178	0.0242182	0.128419	-0.00015	0.999704	0.999832	0.502989	0.00386357	0.0223158	0.309493	0.0666915	0.235201	0.7294	0.4448	1.0625	0.5592	-0.9853	0.0784	0.5949	0.2283	-1.2839	0.1472	NA	-0.3441	-0.1986	0.097	0.0303
A0A0R4IMZ8_K835k_1_1_835_835	A0A0R4IMZ8	A0A0R4IMZ8	kpnb1	K835k	DVMkLVEVRPQINDLLTEGR	0	NA	NA	NA	NA	NA	NA	-0.317529	0.0363241	0.10126	-0.0450627	0.76368	0.89391	NA	NA	NA	NA	NA	NA	NA	NA	NA	NA	NA	NA	-0.5231	NA	-0.3367
A0A0R4IN41_K719k_1_1_719_719	A0A0R4IN41	A0A0R4IN41|A0A0R4IZ16|A0A0R4IAB7	A0A0R4IN41_K719k_1_1_719_719	K719k	HLSkMQQNGYENPTYK	0	-0.1695	0.52377	0.710088	0.0298917	0.916537	0.984987	0.363016	0.101259	0.204063	-0.0253725	0.910806	0.962855	0.106	0.4673	0.2209	0.0311	0.3178	0.0152	0.0395	0.7297	0.7467	0.4585	-0.4316	0.3541	0.167	-0.3005	0.1565
A0A0R4IN41_K731k_1_1_731_731	A0A0R4IN41	A0A0R4IN41|A0A0R4IZ16|A0A0R4IAB7	A0A0R4IN41_K731k_1_1_731_731	K731k	MQQNGYENPTYkFFEQMHN	0	0.803733	0.107161	0.289372	-0.152033	0.678807	0.896344	0.363016	0.101259	0.204063	-0.0253725	0.910806	0.962855	0.0555	0.7273	1.0509	NA	-0.1122	-0.6236	-0.5015	NA	-0.1925	NA	NA	NA	-0.2152	NA	-0.3056
A0A0R4IN46_K254k_1_1_254_254	A0A0R4IN46	A0A0R4IN46|A0A2R8QKL9	tgm1l1	K254k	YTLTVVTQCLkTNESTTHDPEK	0	0.240625	0.418845	0.622212	0.254425	0.393432	0.725235	0.00120607	0.990907	0.992472	-0.146014	0.21567	0.458914	0.2843	0.2905	0.7456	0.9253	NA	0.0433	0.171	NA	0.1857	0.4559	NA	-0.4798	0.2315	-0.1878	-0.153
A0A0R4IN46_K305k_1_1_305_305	A0A0R4IN46	A0A0R4IN46|A0A2R8QKL9	tgm1l1	K305k	IYYGTEkQIGAR	0	-0.21635	0.375463	0.586624	0.025825	0.920937	0.985593	0.00120607	0.990907	0.992472	-0.146014	0.21567	0.458914	0.4147	0.6394	0.4146	0.6886	0.129	-0.4709	0.1562	1.0932	1.0386	0.7782	0.1127	0.0804	-0.2465	-0.1251	-0.0597
A0A0R4IN46_K731k_1_1_731_731	A0A0R4IN46	A0A0R4IN46|A0A2R8QKL9	tgm1l1	K731k	LRTPDLQIEPIGEAYVGkEASAK	0	-0.515175	0.269089	0.481682	-0.81265	0.0594021	0.310426	0.00120607	0.990907	0.992472	-0.146014	0.21567	0.458914	-1.3044	-0.0728	0.7274	0.3485	-0.277	-0.7931	-0.0393	NA	0.3856	0.4941	NA	0.6696	0.3358	0.5464	0.2196
A0A0R4IN87_K244k_1_1_244_244	A0A0R4IN87	A0A0R4IN87|Q1LVI0	gatad2ab	K244k	KTDTDMLMkSSPAER	0	-1.07163	0.00676531	0.061104	0.00734167	0.982975	0.994308	0.244419	0.046752	0.119654	0.238039	0.0691017	0.240701	-0.073	-0.474	0.1237	-1.0924	0.4517	-0.05	-0.1042	0.6667	0.3205	1.0909	NA	0.7907	-0.1943	0.0231	-0.2522
A0A0R4INK2_K181k_1_1_181_181	A0A0R4INK2	E9QCE6|F1QZD3|A0A0R4INK2	uap1	K181k	DFFIQHkYFGLK	0	0.301508	0.353992	0.568572	0.277042	0.393266	0.725235	-1.45804	2.68773e-05	0.00121067	0.095272	0.706852	0.864046	0.4367	0.319	0.2817	0.0433	0.8083	0.1613	0.5663	0.6979	-0.4736	-0.3183	NA	-0.0917	-0.1357	0.381	0.7861
A0A0R4INL5_K105k_1_1_105_105	A0A0R4INL5	Q568J5|A0A0R4INL5	lypla1	K105k	ALIDQEVkNGIPSHR	0	-0.743275	0.0599666	0.213527	-0.20635	0.528071	0.810869	0.253982	0.239454	0.369314	0.628227	0.0144961	0.0921038	-1.0207	0.2601	-0.5693	-0.8896	0.0089	-0.3533	0.0534	0.4205	-0.0437	NA	NA	0.4044	0.2542	-0.387	0.1658
A0A0R4INL5_K154k_1_1_154_154	A0A0R4INL5	A0A0R4INL5	lypla1	K154k	NSLSkSVISK	0	-0.548733	0.0653878	0.225326	0.144358	0.607297	0.860902	0.253982	0.239454	0.369314	0.628227	0.0144961	0.0921038	-0.3249	-0.3082	0.2203	-0.0716	-0.2008	-0.5607	0.2804	0.2702	0.8385	0.1742	NA	-0.208	-0.2619	-0.7457	-0.0033
A0A0R4IP25_K314k_1_1_314_314	A0A0R4IP25	A2BGE2|A0A0R4IP25	A0A0R4IP25_K314k_1_1_314_314	K314k	TSGTWFIQSLCENLkEGSK	0	-0.985025	0.117838	0.301923	-0.893267	0.0588501	0.309147	-0.237467	0.191786	0.31486	0.613995	0.005867	0.0515987	-0.1755	0.3024	-0.63	-0.8598	-1.2165	0.2558	-0.1513	NA	NA	NA	0.6443	NA	0.0554	0.7634	0.749
A0A0R4IPH8_K45k_1_1_45_45	A0A0R4IPH8	A0A0R4IPH8|Q7T2C8	txnrd3	K45k	DLFkELNVK	0	0.635575	0.0605503	0.214022	0.191117	0.549347	0.825102	-0.218999	0.127952	0.24008	-0.0683674	0.64597	0.831	-0.2474	-0.408	0.1998	-0.0933	0.5885	0.4122	-0.0876	-1.1214	0.053	-1.25	NA	0.3344	0.1189	0.1943	-0.1946
A0A0R4IPK7_K226k_1_1_226_226	A0A0R4IPK7	A0A0R4IPK7|A5WWM0|Q08BZ6	A0A0R4IPK7_K226k_1_1_226_226	K226k	EAVILPIKFPHLFTGkR	0	-1.13385	0.0363879	0.158188	NA	NA	NA	0.104783	0.415645	0.547836	-0.0785328	0.569546	0.780632	NA	0.4706	0.5577	NA	-0.4087	-0.5584	NA	NA	NA	1.648	NA	NA	NA	NA	NA
A0A0R4IPK7_K280k_1_1_280_280	A0A0R4IPK7	A0A0R4IPK7|A5WWM0	A0A0R4IPK7_K280k_1_1_280_280	K280k	LVkSLFTLAR	0	-0.6591	0.104309	0.285173	-0.0169583	0.967697	0.991969	0.104783	0.415645	0.547836	-0.0785328	0.569546	0.780632	0.5105	1.016	-0.1877	0.027	0.3949	-0.3003	-0.6326	0.6509	0.9465	2.19	0.2148	-0.3703	0.0223	-0.2607	-0.0408
A0A0R4IPQ7_K181k_1_1_181_181	A0A0R4IPQ7	Q642H3|A4FUM1|A0A0R4IPQ7|F1QVB3|F1QJK2|E9QC83|F1R3Q3	2021-09-06	K181k	KLDSkVNIIPIIAK	0	0.37635	0.138571	0.32944	0.4564	0.0775292	0.355583	0.375378	0.00344555	0.0208708	0.168584	0.161023	0.389267	-0.1255	0.3605	-0.3017	0.1589	0.3472	0.7174	0.4384	-0.6229	-0.3632	-0.0738	NA	-0.1047	0.4127	-0.1172	-0.0124
A0A0R4IPV1_K217k_1_1_217_217	A0A0R4IPV1	A0A0R4IPV1	alad	K217k	DAAQSkPAFGDRR	0	-0.003675	0.992693	0.994956	-0.397442	0.272841	0.625175	-0.287955	0.173164	0.295534	-0.297179	0.191715	0.429717	-0.0504	-0.7164	-0.1815	-0.1136	0.1792	-0.6416	0.0434	0.2897	-0.8133	NA	NA	-0.2477	0.8142	0.5038	-0.0392
A0A0R4IPW9_K29k_1_1_29_29	A0A0R4IPW9	F1QKS0|A0A286YAD0|A0A0R4IPW9	myo5b	K29k	SAEIIkDYK	0	0.0175	0.962209	0.982576	-0.147517	0.712176	0.905502	-1.96289	1.48217e-05	0.000886787	-0.570282	0.0931195	0.282841	-0.2076	-0.4079	0.9271	0.5236	0.4047	0.4449	-0.1796	-0.3151	-0.0423	0.8956	0.227	0.5683	0.9912	-0.4164	0.3403
A0A0R4IQ11_K12k_1_1_12_12	A0A0R4IQ11	A0A0R4IQ11	scinla	K12k	EFQNAGkEPGLQIWR	0	-0.193175	0.375997	0.586638	-0.2688	0.258135	0.609911	0.200231	0.148745	0.266254	-0.0604743	0.674598	0.846249	-0.0065	0.0792	0.0273	-0.3527	0.3035	0.0861	-0.1868	0.0514	0.4738	-0.1373	0.1321	0.6635	0.4328	0.118	0.1313
A0A0R4IQ11_K599k_1_1_599_599	A0A0R4IQ11	A0A0R4IQ11	scinla	K599k	DYQTSkNLQK	0	0.00515	0.983178	0.991838	0.0066	0.980042	0.994226	0.200231	0.148745	0.266254	-0.0604743	0.674598	0.846249	0.3383	0.7044	-0.0761	0.2871	0.1923	0.1013	0.3457	0.7129	0.3565	0.0495	0.1142	0.6862	-0.1159	0.3188	-0.0631
A0A0R4IQ11_K616k_1_1_616_616	A0A0R4IQ11	A5PMZ3|A0A0R4IQ11	scinla	K616k	LFGCSNkTGR	0	-0.40325	0.0453042	0.18363	-0.360975	0.0904821	0.380442	0.200231	0.148745	0.266254	-0.0604743	0.674598	0.846249	0.2253	0.2477	0.2709	-0.1818	-0.2336	0.0211	0.2497	0.5886	0.4019	0.5781	0.6065	0.3701	0.2402	0.4893	0.3939
A0A0R4IQ11_K669k_1_1_669_669	A0A0R4IQ11	A0A0R4IQ11	scinla	K669k	IAkDYVDSDPSK	0	-0.178325	0.757607	0.874298	0.302692	0.554501	0.827507	0.200231	0.148745	0.266254	-0.0604743	0.674598	0.846249	0.5024	0.6281	-1.0634	-0.3698	0.0564	0.0081	0.3011	-0.1705	0.3758	NA	NA	0.5764	0.4142	-1.5418	-0.1721
A0A0R4IQ11_K678k_1_1_678_678	A0A0R4IQ11	A0A0R4IQ11	scinla	K678k	DYVDSDPSkR	0	-0.650717	0.129364	0.317471	-0.107817	0.752699	0.925753	0.200231	0.148745	0.266254	-0.0604743	0.674598	0.846249	-0.5703	NA	0.0184	0.312	0.3297	-0.4392	-0.7586	0.6761	0.4654	NA	NA	0.3773	-0.4743	-0.5569	-0.0723
A0A0R4IQB8_K209k_1_1_209_209	A0A0R4IQB8	A0A0R4IQB8	ftsj3	K209k	PQASRNESAEIFVVCQGFLAPDKIDNk	0	1.39455	0.0396499	0.167939	-1.37243	0.0553488	0.297317	-0.141208	0.507872	0.632049	-0.0673334	0.768446	0.89704	0.0472	-2.3574	0.13	-0.7076	-1.7242	0.3424	-0.0642	-2.1698	-2.2937	-1.886	NA	NA	0.0137	1.2547	1.4029
A0A0R4IQG7_K298k_1_1_298_298	A0A0R4IQG7	A0A0R4IQG7	nos1	K298k	AVQNGSPSkCPR	0	NA	NA	NA	NA	NA	NA	-0.501581	0.048898	0.12393	-0.394245	0.137699	0.357816	NA	NA	NA	NA	NA	NA	NA	NA	0.5951	NA	NA	0.4815	-0.6358	NA	NA
A0A0R4IQN8_K897k_1_1_897_897	A0A0R4IQN8	Q8JIU7|F1RE85|A0A2R8QLG5|A0A0R4IQN8|E9QCS9	naca	K897k	AMSkLGLR	0	0.0786	0.815849	0.908131	0.237308	0.517674	0.804824	1.86779	5.88625e-05	0.00193737	0.73449	0.0526224	0.20421	-0.9412	0.1534	0.2475	0.1167	0.5764	0.998	0.283	-0.0163	-0.0987	-0.596	-0.027	0.9445	0.8462	-0.3727	0.1093
A0A0R4IQN8_K915k_1_1_915_915	A0A0R4IQN8	Q8JIU7|F1RE85|A0A2R8QLG5|A0A0R4IQN8	naca	K915k	SkNILFVITKPDVYK	0	-0.453325	0.0556609	0.205804	-0.213783	0.379535	0.715382	1.86779	5.88625e-05	0.00193737	0.73449	0.0526224	0.20421	-0.174	0.2229	0.273	0.256	0.4329	0.5439	-0.2581	0.5848	0.4796	0.8083	0.5185	0.5498	0.7092	0.2015	0.3529
A0A0R4IQN8_K959k_1_0_957_959	A0A0R4IQN8	A0A0R4IQN8|Q8JIU7|F1RE85|A0A2R8QLG5	naca	K959k	IEDLSQQAQLAAAEKFk	1	-0.395775	0.381301	0.590613	-0.791733	0.139585	0.463879	1.86779	5.88625e-05	0.00193737	0.73449	0.0526224	0.20421	0.653	0.0819	0.9027	-0.9271	-0.9347	0.571	-0.6895	0.4994	0.01	0.3156	1.4686	NA	0.2273	0.2822	0.8125
A0A0R4IQR0_K330k_1_1_330_330	A0A0R4IQR0	A0A0R4IQR0|E9QIF0|Q6P020|Q6NUY9|B0S585	mapre2	K330k	ERDFYFGkLR	0	0.004525	0.986869	0.992893	-0.0406333	0.891206	0.974168	-0.0503765	0.696037	0.787272	-0.174254	0.223353	0.467266	0.4691	1.4072	0.641	0.3699	0.0767	-0.2028	-0.0054	0.6327	0.6651	0.4234	1.1479	0.3865	-0.1232	0.2505	-0.5266
A0A0R4IR43_K23k_1_1_23_23	A0A0R4IR43	A0A0R4IR43	ano1a	K23k	GIDEDNSkGTR	0	-1.29525	0.0740112	0.238173	-0.324775	0.441397	0.757094	0.113242	0.88318	0.921962	0.77826	0.357861	0.607062	NA	NA	-0.5526	-0.8963	-0.1584	-0.2096	0.956	0.5708	NA	NA	NA	0.0964	-0.1349	1.014	1.1076
A0A0R4IRN5_K107k_1_1_107_107	A0A0R4IRN5	A0A0R4IJB0|A0A0R4IRN5|E7F290	si:ch211-222l21.1	K107k	RPAEEEEAVETkK	0	0.0957833	0.851435	0.926859	0.204533	0.689878	0.90001	0.336341	0.277069	0.410267	0.327535	0.325005	0.578243	-0.4079	-1.0557	-1.5211	-0.8523	0.528	0.8339	-1.2475	-1.1655	-0.8622	-1.1374	NA	0.9065	0.116	-0.846	-0.8421
A0A0R4IRS1_K400k_1_1_400_400	A0A0R4IRS1	F1R3L9|A0A2R8QFD9|F1Q997|A0A0R4IRS1	ap1m1	K400k	IIEkSGYQALPWVR	0	-0.481192	0.0299019	0.142964	0.05825	0.774285	0.934043	0.38082	0.0229654	0.0735684	-0.0682837	0.675236	0.846249	0.1051	-0.0626	-0.0783	0.0097	0.0647	-0.276	0.0406	0.6394	0.299	0.4856	NA	-0.0925	-0.0673	-0.3591	0.0583
A0A0R4IS57_K1270k_1_1_1270_1270	A0A0R4IS57	Q696W0|F1R3X9|A0A0R4IS57|Q1LYE8	spega	K1270k	GAFSYVkR	0	0.5681	0.144671	0.339197	-0.0542167	0.893679	0.976108	-0.541104	0.392711	0.525881	0.389357	0.565934	0.778098	1.3333	1.3547	1.0684	0.4676	-0.1046	-0.0422	-0.2665	1.1352	0.9218	0.6818	-0.7872	0.134	-0.7045	0.3116	-0.0753
A0A0R4IS57_K2227k_1_1_2227_2227	A0A0R4IS57	A0A0R4IS57	spega	K2227k	VSGFSLRKQSQSEGEGTk	0	-0.184875	0.406016	0.611653	-0.181667	0.44878	0.762271	-0.541104	0.392711	0.525881	0.389357	0.565934	0.778098	-0.0231	0.2088	0.3529	-0.0482	0.1928	-0.0284	-0.0482	-0.0804	0.6779	0.3603	0.2721	0.6152	-0.0818	0.1173	0.2309
A0A0R4IS70_K261k_1_1_261_261	A0A0R4IS70	Q6PHK6|A0A0R4IS70|A2BFY7	purba	K261k	VSEVkPSYR	0	-0.196825	0.53989	0.720825	-0.0621417	0.856974	0.96106	0.875266	0.0118346	0.047027	0.464428	0.173803	0.407188	-0.3107	0.398	0.093	-0.1011	0.1097	0.0148	-0.0989	0.3215	0.7637	0.502	-0.7207	0.6517	0.2486	-0.178	-0.4396
A0A0R4IS70_K277k_1_1_277_277	A0A0R4IS70	A0A0R4IS70|A2BFY7	purba	K277k	AWSkFGGAFCR	0	-0.152225	0.466542	0.668493	-0.269183	0.240106	0.591967	0.875266	0.0118346	0.047027	0.464428	0.173803	0.407188	0.1723	-0.018	0.406	0.259	0.13	-0.1159	-0.0001	0.4754	0.5985	0.3174	0.0369	0.6033	0.0619	0.4112	0.019
A0A0R4IS70_K84k_1_1_84_84	A0A0R4IS70	Q6PHK6|A0A0R4IS70|A2BFY7	purba	K84k	IAEVGAGGSkSR	0	-0.2792	0.384606	0.594336	-0.210825	0.540665	0.819643	0.875266	0.0118346	0.047027	0.464428	0.173803	0.407188	0.227	-0.2257	0.4891	-0.1122	0.0235	-0.2492	-0.3815	0.7185	1.1617	-0.0912	-0.294	0.4942	-0.2371	-0.3205	0.0971
A0A0R4ISC7_K102k_1_1_102_102	A0A0R4ISC7	A0A0R4ISC7|Q6DGY8|Q7SXN6	psma6b	K102k	YEAANWkYK	0	0.0685	0.87051	0.93646	0.856117	0.0741683	0.346615	0.30664	0.353422	0.48843	0.300174	0.398902	0.643786	0.2932	0.6021	0.8017	0.6919	-0.2253	1.1153	0.1071	-0.3336	-0.0839	1.0737	1.4587	-1.3628	-0.0095	-0.4448	-0.2779
A0A0R4ISK8_K37k_1_1_37_37	A0A0R4ISK8	A0A0R4ISK8|A2CE73|Q6NW56	A0A0R4ISK8_K37k_1_1_37_37	K37k	DSLDSSFTHAMkLLSAEIER	0	-0.1757	0.851442	0.926859	-0.994	0.165406	0.500638	0.152755	0.182842	0.305868	0.372816	0.00733137	0.0594852	0.2112	-1.2651	0.2709	-0.5406	-2.3946	0.109	0.548	NA	NA	NA	-0.1552	NA	0.1625	0.4291	0.6528
A0A0R4ISK8_K48k_1_1_48_48	A0A0R4ISK8	A0A0R4ISK8|A2CE73|Q6NW56	A0A0R4ISK8_K48k_1_1_48_48	K48k	VQkGEPKK	0	1.13515	0.000525974	0.0137803	1.22903	0.000515039	0.020375	0.152755	0.182842	0.305868	0.372816	0.00733137	0.0594852	0.5016	0.3136	0.1448	0.6509	0.1493	1.0738	0.7722	-0.4933	-0.4118	-1.2412	-0.7834	-0.7697	-0.6389	-0.1014	-0.7457
A0A0R4ISK8_K78k_1_1_78_78	A0A0R4ISK8	A0A0R4ISK8|A2CE73	A0A0R4ISK8_K78k_1_1_78_78	K78k	VLIPVkQYPR	0	-0.064625	0.859128	0.930644	0.448883	0.263675	0.613827	0.152755	0.182842	0.305868	0.372816	0.00733137	0.0594852	-0.2438	-0.6171	0.4139	0.4104	0.2793	0.169	0.5409	0.2425	0.066	0.9853	-1.0719	0.1491	-0.3508	-0.157	-0.1179
A0A0R4ISK8_K88k_1_1_88_88	A0A0R4ISK8	A0A0R4ISK8|A2CE73|Q6NW56	A0A0R4ISK8_K88k_1_1_88_88	K88k	FNFVGkILGPQGSTIK	0	-0.5025	0.192273	0.396033	-0.333917	0.346447	0.689753	0.152755	0.182842	0.305868	0.372816	0.00733137	0.0594852	0.0335	0.2883	-1.145	NA	-0.1339	-0.0787	-0.0018	0.7889	0.1716	-0.2762	NA	0.1531	0.0764	0.5926	0.2277
A0A0R4ISK8_K98k_1_1_98_98	A0A0R4ISK8	A0A0R4ISK8|A2CE73|Q6NW56	A0A0R4ISK8_K98k_1_1_98_98	K98k	ILGPQGSTIkR	0	-0.5548	0.16282	0.361255	0.327208	0.435446	0.752429	0.152755	0.182842	0.305868	0.372816	0.00733137	0.0594852	-0.4124	-1.0892	0.6877	0.5387	0.5213	0.2639	0.0966	0.5017	0.0007	0.5938	0.8478	0.7237	0.0867	-0.6381	-0.3054
A0A0R4ITL8_K4k_1_1_4_4	A0A0R4ITL8	A0A0R4ITL8	fundc2	K4k	SEkESFDVLELAEK	0	0.368175	0.40622	0.611727	-0.263242	0.579977	0.846541	2.06883	0.000343866	0.00521074	1.0086	0.0485917	0.194172	0.883	0.6543	0.7841	0.4354	-0.5748	0.2268	0.3805	0.1258	-0.0446	0.5194	0.6835	-1.3453	1.1713	0.9645	0.3058
A0A0R4ITP2_K117k_1_1_117_117	A0A0R4ITP2	A0A0R4ITP2	atxn3	K117k	AFICNYkEHWFTVR	0	0.982275	0.00286214	0.0370021	0.178667	0.558366	0.830287	-0.202311	0.0685111	0.156858	-0.307188	0.0153309	0.0959657	-0.1795	-0.3856	-0.2565	0.2521	0.7158	0.8322	0.2891	-1.0767	-0.8711	-0.6512	-1.8996	0.685	0.7228	0.0841	0.2429
A0A0R4IU05_K570k_1_1_570_570	A0A0R4IU05	A0A0R4IU05|B0R024	ap1g1	K570k	AVEYNALFkK	0	-0.34935	0.4113	0.615162	0.453925	0.289696	0.639814	-0.280334	0.00836272	0.0373495	-0.17918	0.0886866	0.274994	-0.2235	0.7891	0.5189	-0.3307	0.3261	0.403	0.1157	-0.2179	0.2837	1.5476	NA	0.2828	0.024	-0.0929	-0.9032
A0A0R4IU36_K14k_1_1_14_14	A0A0R4IU36	F1Q9D1|A0A0R4IU36	alyref	K14k	MDMSLDDIIkQNR	0	0.030925	0.910998	0.959275	-0.676425	0.0259131	0.204958	0.14397	0.235525	0.365565	0.0690797	0.589822	0.792418	0.0247	0.1337	0.034	-0.1683	-0.296	-0.2036	-0.1112	-0.1953	-0.4849	NA	0.6055	0.0348	0.3613	0.6777	0.8175
A0A0R4IUB5_K185k_1_1_185_185	A0A0R4IUB5	A0A0R4IUB5	srsf11	K185k	LNPLAAGLNLTPGLkADASNK	0	-0.7044	0.190458	0.394496	-0.699267	0.16965	0.505646	0.383218	0.120051	0.229078	0.0439818	0.862292	0.938193	0.3036	-1.8504	-0.3433	0.1089	-0.4269	-0.2733	0.3421	NA	NA	0.3901	0.1281	NA	0.2314	0.8945	0.6138
A0A0R4IUB6_K107k_1_1_107_107	A0A0R4IUB6	F1Q5Z9|F1QH06|A0A0R4IUB6	epn1	K107k	ENIYAVQTLkDFQYIDRDGK	0	1.63613	0.0248785	0.129499	0.942983	0.169835	0.505646	0.664621	0.00186869	0.014611	0.337383	0.0900031	0.277853	-1.0357	-0.5601	-0.6492	0.2562	0.2594	1.1726	0.963	-1.1839	-3.4387	-1.7774	NA	-2.1464	0.2687	0.7654	0.5337
A0A0R4IUB6_K117k_1_1_117_117	A0A0R4IUB6	F1Q5Z9|F1QH06|A0A0R4IUB6	epn1	K117k	DFQYIDRDGkDQGVNVR	0	-0.1788	0.427618	0.631496	-0.0340167	0.887721	0.972887	0.664621	0.00186869	0.014611	0.337383	0.0900031	0.277853	-0.0908	0.2872	-0.0343	0.2256	0.3472	-0.0486	0.3591	0.718	0.2862	0.3304	-0.2317	0.3237	0.1602	0.1011	0.428
A0A0R4IUB6_K128k_1_1_128_128	A0A0R4IUB6	F1QH06|A0A0R4IUB6	epn1	K128k	AkQLVTLLK	0	0.3607	0.483977	0.680872	0.166667	0.711914	0.905502	0.664621	0.00186869	0.014611	0.337383	0.0900031	0.277853	0.2032	-0.5392	-0.9351	0.2439	-0.2939	0.9026	0.353	-1.1279	NA	-0.1071	NA	-0.8619	0.3354	0.5183	0.6238
A0A0R4IUB6_K209k_1_1_209_209	A0A0R4IUB6	F1Q5Z9|F1QH06|A0A0R4IUB6	epn1	K209k	EEAEQkRPCCDK	0	-0.718367	0.0742716	0.238173	-0.0208833	0.956092	0.991327	0.664621	0.00186869	0.014611	0.337383	0.0900031	0.277853	-1.6546	-1.6492	-1.3824	-1.0266	0.5397	0.295	-0.329	-0.0419	-0.2487	-1.8389	NA	0.2766	0.2143	0.2436	0.0233
A0A0R4IUB7_K425k_1_1_425_425	A0A0R4IUB7	A0A0R4IUB7	metap2b	K425k	LGETkYLMALK	0	0.237925	0.484531	0.681167	-0.143758	0.694116	0.90001	0.523358	0.000966837	0.0095658	0.82683	3.3036e-05	0.00215061	-0.3319	0.065	0.0178	-0.0158	-0.1091	0.5698	0.4581	-1.0018	-0.6533	0.5578	-0.1193	-0.3364	0.5943	0.6803	0.8619
A0A0R4IUF6_K176k_1_1_176_176	A0A0R4IUF6	A0A0R4IUF6	A0A0R4IUF6_K176k_1_1_176_176	K176k	ENQAkLK	0	2.14222	0.000762988	0.0171499	1.85332	0.00237051	0.0517561	0.814339	7.67347e-05	0.00220931	0.719576	0.000458898	0.0108577	0.7792	0.005	0.4316	1.5555	-0.3143	0.8178	1.1102	-0.5992	-1.5237	-2.2253	NA	-2.1498	-1.6127	-0.4559	-1.0433
A0A0R4IUF6_K185k_1_1_185_185	A0A0R4IUF6	A0A0R4IUF6	A0A0R4IUF6_K185k_1_1_185_185	K185k	ADLSESkLSK	0	-0.102383	0.787672	0.890294	0.1924	0.613943	0.86451	0.814339	7.67347e-05	0.00220931	0.719576	0.000458898	0.0108577	0.3994	-0.1813	-0.7592	-0.1359	0.7403	-0.2505	0.0103	0.2366	-0.2093	-0.2279	NA	0.6645	0.4101	-0.6371	-0.5403
A0A0R4IUF6_K45k_1_1_45_45	A0A0R4IUF6	A0A0R4IUF6	A0A0R4IUF6_K45k_1_1_45_45	K45k	DIIACMkDR	0	-0.029075	0.944288	0.976381	0.255675	0.57148	0.840864	0.814339	7.67347e-05	0.00220931	0.719576	0.000458898	0.0108577	-0.2146	1.4004	0.0969	-0.2559	1.3144	-0.4028	-0.0758	0.7107	-0.0332	0.6699	-0.2043	0.3742	-0.0625	-0.2074	-0.0126
A0A0R4IUF6_K66k_1_1_66_66	A0A0R4IUF6	A0A0R4IUF6	A0A0R4IUF6_K66k_1_1_66_66	K66k	WkSITETRPLYGSLLR	0	0.85895	0.0312189	0.145432	0.4211	0.202662	0.543544	0.814339	7.67347e-05	0.00220931	0.719576	0.000458898	0.0108577	0.4291	1.1436	0.6715	1.0512	-0.2813	0.4804	-0.1001	NA	-0.6666	0.5964	NA	-0.3484	-0.255	-0.3888	-0.5602
A0A0R4IUU4_K3k_1_1_3_3	A0A0R4IUU4	A0A0R4ICP0|A0A0R4IGH4|A0A0R4IJ18|A0A0R4IB33|A0A0R4IUU4	si:ch1073-205c8.3	K3k	MIkLFSLK	0	0.322933	0.655937	0.804616	-1.80913	0.0326378	0.228497	0.227358	0.133056	0.24652	0.0170137	0.913232	0.96417	-0.3756	-0.7797	0.7011	-0.1046	-1.6977	-0.2621	-0.9124	-2.629	NA	-0.1554	1.3965	NA	0.6156	0.9256	1.014
A0A0R4IUU4_K74k_1_1_74_74	A0A0R4IUU4	A0A0R4ICP0|A0A0R4IGH4|A0A0R4IJ18|A0A0R4IUU4	si:ch1073-205c8.3	K74k	LIISPDEGFYkGGK	0	0.06805	0.789471	0.891055	-0.0283083	0.918014	0.984987	0.227358	0.133056	0.24652	0.0170137	0.913232	0.96417	0.4032	0.5929	0.2828	1.0893	-0.5279	-0.1191	-0.3692	0.8235	0.4758	0.5508	0.2459	0.2153	-0.167	-0.75	-0.54
A0A0R4IV67_K1333k_1_1_1333_1333	A0A0R4IV67	A0A0R4IV67	agla	K1333k	IQkNFEK	0	-0.901825	0.161356	0.359539	0.2736	0.660631	0.889284	0.369486	0.00699095	0.0334869	0.760606	3.95665e-05	0.00243584	-0.1366	-0.9864	-0.0165	-2.0826	0.6873	-1.2225	0.5166	0.9134	0.6255	-1.25	NA	-0.4309	-0.7717	0.2306	-0.1472
A0A0R4IV67_K151k_1_1_151_151	A0A0R4IV67	A0A0R4IV67	agla	K151k	VAkEAGYNMIHFTPLQTLGESR	0	-0.0147	0.979718	0.991244	-1.47237	0.0231333	0.191863	0.369486	0.00699095	0.0334869	0.760606	3.95665e-05	0.00243584	-0.5554	-0.9939	-1.336	NA	-1.8785	-0.2413	0.467	NA	-1.9173	-0.9041	-0.0198	NA	0.848	0.7489	1.1674
A0A0R4IVK5_K48k_1_1_48_48	A0A0R4IVK5	A0A0R4IVK5|F1Q9D8	bin2a	K48k	GGANVLAkR	0	-0.294925	0.227221	0.438054	-0.0247917	0.923246	0.98639	-0.115524	0.596312	0.709001	-0.543686	0.0344026	0.154934	0.4999	0.7385	0.7083	1.1003	-0.3565	-1.0097	0.0967	1.2363	1.2148	0.8463	0.9293	-0.3019	-0.482	-0.4337	-0.3759
A0A0R4IVZ0_K25k_1_1_25_25	A0A0R4IVZ0	A0A0R4IVZ0	nup153	K25k	GkQQPGLITR	0	0.0345667	0.88592	0.946705	-0.0202167	0.928506	0.987285	-0.141071	0.207738	0.333484	-0.121065	0.311275	0.566695	0.041	NA	0.2663	0.0216	0.1625	-0.1129	-0.1254	-0.0922	0.3788	-0.0614	NA	-0.0144	0.2686	0.0082	-0.2826
A0A0R4IWA8_K283k_1_1_283_283	A0A0R4IWA8	A0A0R4IWA8|A0A286YBR1	A0A0R4IWA8_K283k_1_1_283_283	K283k	CPVEYQEkLGR	0	-0.747075	0.0710677	0.232735	-0.390033	0.362718	0.701827	0.632495	0.123681	0.233783	0.149838	0.723675	0.873396	1.3881	1.6241	1.3218	0.2997	-1.6324	-1.5123	-2.2335	1.1902	1.9762	2.1958	2.2598	-0.3508	-1.8883	-1.3787	-1.993
A0A0R4IWJ1_K342k_1_1_342_342	A0A0R4IWJ1	A8E7E7|A0A0R4IWJ1	A0A0R4IWJ1_K342k_1_1_342_342	K342k	RENFERGNLELEkR	0	-0.4425	0.262389	0.475063	-0.368467	0.253631	0.604102	-0.284626	0.0027061	0.017952	-0.19514	0.0353583	0.157587	NA	NA	-0.5447	-0.8724	0.2034	0.1098	-0.119	NA	-0.5487	0.0166	NA	0.8237	0.5454	NA	-0.0695
A0A0R4IWM4_K980k_1_1_980_980	A0A0R4IWM4	A0A0R4IWM4	zc3h7a	K980k	YSFLLkDIK	0	NA	NA	NA	0.3403	0.332375	0.677354	-0.178807	0.182586	0.305611	-0.114328	0.419451	0.662437	NA	NA	NA	NA	-0.0738	0.0679	-0.3238	NA	NA	NA	NA	-0.1745	-1.0427	-0.1334	NA
A0A0R4IWN8_K6k_1_1_6_6	A0A0R4IWN8	A0A0R4IWN8	si:ch73-281n10.2	K6k	SkANNDTEAAGPK	0	0.9872	0.00445896	0.0494108	0.799792	0.0242271	0.196521	0.195558	0.498273	0.623652	0.999157	0.00588861	0.051717	0.3971	0.594	0.5061	0.5173	0.3208	0.9352	-0.1581	-0.4678	-0.6069	-0.5669	-0.2927	-1.3333	0.1823	-0.3776	-0.2067
A0A0R4IX34_K2356k_1_1_2356_2356	A0A0R4IX34	A0A0R4IX34	zzef1	K2356k	AAVVDVkTR	0	-0.71395	0.047473	0.189341	0.0242583	0.946775	0.989668	0.571502	0.0141536	0.052957	-0.23285	0.304161	0.559364	0.584	0.4481	0.5349	-0.8531	0.1452	-0.4313	-0.1287	0.9902	1.5371	0.4936	0.5488	-0.3091	0.0038	0.1751	-0.5199
A0A0R4IX34_K2568k_1_1_2568_2568	A0A0R4IX34	A0A0R4IX34|A2CES1	zzef1	K2568k	AMYELQMkR	0	0.325275	0.407906	0.612396	0.0301417	0.942737	0.989668	0.571502	0.0141536	0.052957	-0.23285	0.304161	0.559364	0.4187	1.0201	0.6068	0.7783	0.205	-0.3426	0.175	-0.6054	-0.3243	1.1637	1.2888	-0.4339	0.3947	-0.1784	0.1469
A0A0R4IX34_K2579k_1_1_2579_2579	A0A0R4IX34	A0A0R4IX34|A2CES1	zzef1	K2579k	RTDSFFLEVQkR	0	-0.950575	0.076654	0.241316	0.0424083	0.938464	0.989668	0.571502	0.0141536	0.052957	-0.23285	0.304161	0.559364	-1.214	-1.2391	-1.6107	-1.0267	-0.6291	-0.9426	-0.7904	1.287	0.1286	-0.768	-1.9358	-0.194	-0.4924	-1.2249	-1.4078
A0A0R4IX34_K2587k_1_1_2587_2587	A0A0R4IX34	A0A0R4IX34|A2CES1	zzef1	K2587k	RFDGDAIkTDETIR	0	0.492	0.414749	0.61915	-0.159008	0.805246	0.945267	0.571502	0.0141536	0.052957	-0.23285	0.304161	0.559364	-0.5787	-0.4498	-0.6402	-0.3772	0.4664	-0.2624	0.1523	0.1941	-0.0686	-0.5637	-3.5757	0.1324	0.6915	0.0713	0.2159
A0A0R4IX34_K2598k_1_1_2598_2598	A0A0R4IX34	A0A0R4IX34|A2CES1	zzef1	K2598k	TLAQkWQPSK	0	-0.445442	0.0552503	0.205473	0.307883	0.170488	0.506312	0.571502	0.0141536	0.052957	-0.23285	0.304161	0.559364	0.2084	-0.139	-0.3881	-0.3824	-0.0974	0.133	0.3902	0.3191	0.2821	0.2093	NA	-0.2234	-0.1426	-0.2378	-0.06
A0A0R4IX34_K2603k_1_1_2603_2603	A0A0R4IX34	A0A0R4IX34|A2CES1	zzef1	K2603k	WQPSkRPR	0	0.0874583	0.72473	0.852002	0.457967	0.080777	0.360216	0.571502	0.0141536	0.052957	-0.23285	0.304161	0.559364	-0.0612	0.4998	0.4588	0.1663	0.1106	-0.1812	0.3879	0.0405	0.1638	0.3311	NA	-0.7251	-0.1381	-0.5022	-0.0434
A0A0R4IXB7_K1351k_1_1_1351_1351	A0A0R4IXB7	E7FD81|A0A0R4IXB7	fer1l4	K1351k	IPINPLNLVTSPIkK	0	-0.220075	0.690468	0.827227	-0.944	0.0565306	0.301303	0.289694	0.213388	0.339771	0.225102	0.363619	0.612295	0.5884	0.1063	0.3057	0.0433	NA	-1.0276	-0.5492	NA	NA	0.481	NA	NA	-0.7641	0.7689	0.462
A0A0R4IXD9_K208k_1_1_208_208	A0A0R4IXD9	A0A0R4IXD9	tbcd	K208k	DAASVLVSkFVTRPDVK	0	-0.2273	0.647917	0.799239	-0.591583	0.190924	0.531091	-0.0252634	0.927873	0.95378	-0.0705246	0.815192	0.917652	0.5957	-0.1019	0.0175	-0.5553	-1.0257	-0.0127	0.3357	NA	NA	0.13	0.3026	-0.6081	0.12	0.8858	1.0317
A0A0R4IXL0_K214k_1_1_214_214	A0A0R4IXL0	A0A0R4IXL0	polr2b	K214k	DSkYAYTGECR	0	-0.8378	0.294052	0.503271	0.086725	0.881592	0.969982	-0.0892326	0.316299	0.451693	0.120116	0.216625	0.459575	NA	1.0364	-0.2111	-0.0021	0.4628	NA	-0.8806	NA	1.1122	NA	NA	0.8697	-0.6174	-0.6664	-0.7684
A0A0R4IXR0_K396k_1_1_396_396	A0A0R4IXR0	A0A2R8QQX2|A0A0R4IXR0	mfn1b	K396k	NQLNLLIQDIkK	0	-0.2098	0.654355	0.803672	-0.133117	0.792095	0.941174	0.0943259	0.373277	0.50801	0.183754	0.120386	0.331465	-0.3455	-0.3617	-0.6774	-0.0001	0.6715	0.1288	-0.2293	0.9105	0.8357	-0.9376	-1.3541	0.5803	0.9467	-0.1412	-0.092
A0A0R4IYL8_K309k_1_1_309_309	A0A0R4IYL8	A0A0R4IYL8	tpra	K309k	LLkEAMEANK	0	0.48005	0.10237	0.28182	-0.767225	0.00714731	0.0960306	-0.777394	1.44837e-05	0.000886787	-0.848914	1.29537e-05	0.00130581	0.602	0.3159	0.5156	0.5125	-0.5812	-0.3798	-0.6137	0.2764	-0.2635	NA	NA	-0.2345	0.5858	0.2307	0.3873
A0A0R4IYL8_K581k_1_1_581_581	A0A0R4IYL8	A0A0R4IYL8	tpra	K581k	VQkELEQIK	0	-0.385158	0.36267	0.577809	-0.430025	0.311233	0.655623	-0.777394	1.44837e-05	0.000886787	-0.848914	1.29537e-05	0.00130581	-0.857	-0.9475	-0.1518	-0.9114	-0.0692	-0.2274	-0.7441	0.5749	-0.067	-1.5032	NA	0.3651	0.2457	-0.442	0.1637
A0A0R4IYN3_K719k_1_1_719_719	A0A0R4IYN3	A0A0R4IYN3|A3KGU1|A0A2R8QG67	tnksb	K719k	LLLkHGADPSK	0	1.16447	0.0019671	0.0300458	0.514792	0.146862	0.473937	-0.77132	0.0982511	0.199842	0.289783	0.545964	0.760369	0.2074	0.6555	0.7881	1.4459	0.0952	1.0225	0.6435	-0.2542	-0.4511	0.2115	-1.0672	0.1742	0.3082	0.0209	-0.2142
A0A0R4IYT0_K222k_1_1_222_222	A0A0R4IYT0	Q9PW80|A0A0R4IYT0	igf2bp3	K222k	NITkQTHSK	0	-0.0687667	0.864977	0.933656	-0.3502	0.393643	0.725235	-1.53889	0.0944736	0.194367	-0.849966	0.37283	0.620014	0.0496	NA	0.9612	1.6948	0.0094	0.1226	-0.5815	0.9956	0.6846	NA	1.2317	-0.1744	0.6329	NA	0.1426
A0A0R4IYT0_K478k_1_1_478_478	A0A0R4IYT0	Q9PW80|A0A0R4IYT0	igf2bp3	K478k	IAPADGIDAkQR	0	-0.6375	0.149534	0.346189	-0.408117	0.382219	0.716895	-1.53889	0.0944736	0.194367	-0.849966	0.37283	0.620014	0.4612	0.4886	0.9282	0.5164	-0.3624	-0.3433	-0.5497	0.4867	1.3341	1.3234	1.8002	-0.7461	1.5998	-0.3596	-0.5355
A0A0R4IZ33_K63k_1_1_63_63	A0A0R4IZ33	Q7ZV43|A0A0R4IZ33|A0A0R4IVK4	tollip	K63k	LSITVVQAkLAK	0	-0.028875	0.928666	0.96883	-0.324692	0.358228	0.700409	0.116196	0.226512	0.355666	-0.0572255	0.572447	0.782195	-0.1747	0.0717	0.1209	0.1541	0.1511	0.2979	-0.1978	-0.7114	-0.0889	0.5028	0.585	1.2501	0.3189	-0.1029	0.1676
A0A0R4IZ84_K700k_1_1_700_700	A0A0R4IZ84	A0A0R4IZ84	smg6	K700k	GELGkFLR	0	NA	NA	NA	-0.675967	0.0663777	0.328519	1.11839	0.00416704	0.023569	0.775636	0.0440281	0.181549	NA	NA	NA	NA	-0.085	-0.7376	-0.7308	NA	NA	NA	NA	0.5318	NA	0.0865	-0.1438
A0A0R4IZ84_K867k_1_1_867_867	A0A0R4IZ84	A0A0R4IZ84	smg6	K867k	YREQASESANYGkAR	0	NA	NA	NA	-0.3124	0.624894	0.872312	1.11839	0.00416704	0.023569	0.775636	0.0440281	0.181549	NA	NA	NA	NA	NA	NA	-0.4958	NA	NA	NA	NA	NA	-0.1834	NA	NA
A0A0R4J755_K30k_1_1_30_30	A0A0R4J755	A0A0R4J755|E7F0I7	hck	K30k	NVAHYTkDPTTGAK	0	-0.128875	0.757902	0.874382	0.3945	0.294303	0.643567	-0.0352355	0.841609	0.894051	-0.11643	0.543658	0.75941	-0.348	-0.2483	0.3175	-0.1377	-0.0273	0.7631	-0.3548	0.7222	-0.6727	NA	NA	0.0945	-0.084	-0.4989	-0.5816
A0A0R4J7R2_K1312k_1_1_1312_1312	A0A0R4J7R2	E7F632|A0A0R4J7R2	myo18aa	K1312k	DLQVkFDALK	0	0.6181	0.0330165	0.14939	0.264867	0.267627	0.618805	0.575199	8.26835e-05	0.00229991	0.129182	0.260725	0.51237	0.307	0.4244	-0.0244	0.353	0.3918	0.1981	0.3457	-0.3975	-0.3087	NA	NA	0.1545	0.423	-0.0429	-0.3466
A0A0R4J7R2_K1977k_1_1_1977_1977	A0A0R4J7R2	E7F632|A0A0R4J7R2	myo18aa	K1977k	GSTkTLSDDGPQK	0	-0.456425	0.0504511	0.195713	0.2291	0.33882	0.684499	0.575199	8.26835e-05	0.00229991	0.129182	0.260725	0.51237	0.176	0.4347	0.0873	0.695	-0.1577	0.144	0.5756	1.0507	0.7189	0.8692	0.5799	0.033	0.0075	0.0388	-0.2465
A0A0R4J7R2_K1986k_1_1_1986_1986	A0A0R4J7R2	E7F632|A0A0R4J7R2	myo18aa	K1986k	TLSDDGPQkTTR	0	-1.2677	0.00238323	0.0336808	-0.643408	0.0816923	0.360943	0.575199	8.26835e-05	0.00229991	0.129182	0.260725	0.51237	-0.6405	-0.2874	-0.5243	-1.4946	-0.2588	-0.3005	-0.027	1.2351	0.4997	-0.1418	NA	0.8322	0.2756	0.1128	0.5713
A0A0R4J7R2_K794k_1_1_794_794	A0A0R4J7R2	A0A0R4J7R2	myo18aa	K794k	QVkTQIQR	0	-0.183958	0.389484	0.598142	0.468383	0.0401208	0.248797	0.575199	8.26835e-05	0.00229991	0.129182	0.260725	0.51237	0.4452	0.0645	0.2882	0.3908	0.2197	0.0437	0.4981	0.3417	0.7579	0.3438	NA	-0.1537	-0.2714	-0.1464	-0.2867
A0A140LFP0_K1116k_1_1_1116_1116	A0A140LFP0	A0A140LFP0	obscnb	K1116k	SkSMAELK	0	-0.112033	0.783612	0.888243	0.6011	0.155223	0.485593	0.696976	0.000567675	0.00689692	0.422097	0.0244121	0.126725	0.3197	-0.4246	-0.0068	-0.3575	0.6541	-0.5216	0.8284	0.7221	0.2831	-1.021	NA	-0.0697	-0.3878	-0.2502	-0.4155
A0A140LFP0_K1349k_1_1_1349_1349	A0A140LFP0	A0A140LFP0	obscnb	K1349k	ESTTLSAGkK	0	0.6222	0.320525	0.535245	0.576067	0.325308	0.66979	0.696976	0.000567675	0.00689692	0.422097	0.0244121	0.126725	NA	-1.4517	-1.3345	0.2491	0.6349	0.7312	0.4098	-0.9762	-0.4007	-3.0268	NA	0.0969	0.4492	0.214	-0.6965
A0A140LFP0_K501k_1_1_501_501	A0A140LFP0	A0A140LFP0	obscnb	K501k	ATGNILWkHNGK	0	-0.42225	0.187207	0.390401	-0.0663917	0.843288	0.956096	0.696976	0.000567675	0.00689692	0.422097	0.0244121	0.126725	0.2648	0.0976	0.4646	-0.2427	-0.0304	-0.0986	-0.2702	1.1886	1.0868	0.4842	-0.4863	0.0269	-0.081	-0.202	-0.0106
A0A140LFP6_K28k_1_1_28_28	A0A140LFP6	A0A140LFP6	obscnb	K28k	NTLVLTDGkK	0	0.0016	0.995407	0.996414	0.128375	0.669883	0.892861	1.03592	9.44208e-06	0.000726929	0.918132	6.73841e-05	0.00353126	0.1407	0.2398	0.0063	-0.324	0.3867	0.609	0.1341	0.4374	0.3213	-0.3057	-0.3966	0.8868	0.3133	0.0401	-0.2473
A0A140LG01_K218k_1_1_218_218	A0A140LG01	A0A140UHW3|A0A140LG01|A0A140LGF4	myg1	K218k	VSYLNPQWNSkEQDTEEGFRK	0	-0.422083	0.175031	0.37796	-0.783917	0.0188599	0.170791	0.0377447	0.762235	0.835481	-0.205378	0.143832	0.365989	0.309	-0.0994	-0.2943	0.1689	-0.5469	-0.0488	-0.7905	0.5754	0.6654	0.0886	NA	0.8248	0.3244	0.4666	-0.3284
A0A140LGF7_K80k_1_1_80_80	A0A140LGF7	A0A140LGF7	si:dkey-1k23.3	K80k	SGFLAPLLQASGPAVFSkPHR	0	0.955775	0.0192115	0.11095	-0.412117	0.113905	0.420443	0.469323	0.108741	0.214506	-0.353937	0.250477	0.499772	-1.1059	-0.6414	-1.1774	-1.0454	0.1656	-0.0585	-0.1619	NA	-1.9483	NA	NA	0.0014	0.5286	0.3464	0.699
A0A140LGL3_K257k_1_1_257_257	A0A140LGL3	A0A140LGL3|A0A2R8QPD1	utrn	K257k	KYFAkHPR	0	-0.4497	0.145224	0.339944	0.594725	0.0794516	0.358269	-0.171924	0.168252	0.289331	-0.300257	0.0347479	0.155825	0.5187	0.0899	0.0735	0.4715	0.1432	0.2756	0.7032	1.0091	0.4928	0.62	0.8305	-1.0814	-0.4143	0.4428	0.17
A0A140LGX4_K157k_1_1_157_157	A0A140LGX4	A0A140LGX4	obscnb	K157k	IkITSESDSSSLR	0	-1.26015	0.0499194	0.194755	-0.504467	0.344667	0.687693	0.788516	6.5746e-05	0.00203396	0.644654	0.000758773	0.0146242	-0.3259	-0.3789	-0.102	-0.51	0.1679	-0.8695	-1.1154	0.9184	0.9435	NA	NA	1.6705	-0.7514	-0.5677	-0.7562
A0A140LGX4_K57k_1_1_57_57	A0A140LGX4	A0A140LGX4	obscnb	K57k	FkTVEDGDIYR	0	-0.124125	0.811077	0.905112	0.42205	0.421381	0.741901	0.788516	6.5746e-05	0.00203396	0.644654	0.000758773	0.0146242	-0.5477	-0.3002	-1.0145	-1.0373	0.6026	0.4716	0.1663	0.1101	0.0197	-1.9322	NA	1.1945	0.1478	-0.7259	-0.6506
A0A140LGX4_K695k_1_1_695_695	A0A140LGX4	A0A140LGX4	obscnb	K695k	SkTTHTLVIR	0	0.679525	0.281203	0.490062	1.8392	0.00146562	0.0388852	0.788516	6.5746e-05	0.00203396	0.644654	0.000758773	0.0146242	0.2755	-0.7898	-0.4839	-0.7301	1.0142	0.6157	0.7323	NA	-1.1116	NA	NA	-0.1461	-1.035	NA	-1.9743
A0A140LGX4_K872k_1_1_872_872	A0A140LGX4	A0A140LGX4	obscnb	K872k	EQTEITEDkR	0	0.057475	0.874858	0.939197	0.25945	0.42577	0.744626	0.788516	6.5746e-05	0.00203396	0.644654	0.000758773	0.0146242	-0.0599	-0.5886	-0.6189	-0.8559	0.6408	-0.188	0.4187	-0.9459	-0.2307	NA	NA	0.6447	-0.0502	-0.1085	-0.3618
A0A140LH11_K137k_1_1_137_137	A0A140LH11	E7F8J2|A0A2R8Q0U0|X1WCD4|A0A140LH11	A0A140LH11_K137k_1_1_137_137	K137k	VKKPAATSVkK	0	0.677125	0.0289343	0.141132	0.0826417	0.788721	0.940882	0.953205	1.96372e-05	0.0010116	0.46295	0.011434	0.0788933	1.5001	1.6016	0.8219	1.2528	-0.7123	-0.6321	-0.9279	1.1643	0.9854	0.4234	-0.1052	-0.433	-1.0599	-1.0438	-0.8236
A0A140LH11_K37k_1_1_37_37	A0A140LH11	X1WCD4|X1WGK9|A0A140LH11|F1R9N6	A0A140LH11_K37k_1_1_37_37	K37k	DLIVkTVTASK	0	0.17135	0.674821	0.816829	0.472242	0.292125	0.641481	1.43659	0.00821364	0.0368916	0.723641	0.169374	0.4	0.4487	1.0855	-0.0453	0.3383	0.0494	0.7154	0.3307	-0.0784	0.2527	0.7014	0.2661	-1.5843	0.3795	0.2818	0.4947
A0A140LH11_K43k_1_1_43_43	A0A140LH11	A0A140LH11|F1R9N6|E7FAK0|A0A140LH34|R4GEY3|E9QFU6|A0A140LH63|A0A140LGZ1|E7F5A4	A0A140LH11_K43k_1_1_43_43	K43k	TVTASkER	0	-0.565433	0.0911358	0.265488	-0.0623667	0.844329	0.956096	1.43659	0.00821364	0.0368916	0.723641	0.169374	0.4	-0.18	0.7722	0.4367	-0.4353	0.3086	-0.8188	-0.0033	0.7178	0.6514	0.7723	NA	0.0115	-0.2158	-0.1341	-0.0968
A0A140LH11_K88k_1_1_88_88	A0A140LH11	A0A140LH24|A0A140LFZ1|A0A140LH11|A0A140LH34	A0A140LH11_K88k_1_1_88_88	K88k	ALVTNGTLAQTkGTGASGSFK	0	-0.130883	0.672865	0.81627	-0.184675	0.552616	0.826218	1.43659	0.00821364	0.0368916	0.723641	0.169374	0.4	-0.1116	0.8725	0.2818	0.3167	0.3872	-0.8468	0.0669	0.5443	0.6267	0.2412	NA	0.3353	-0.0749	-0.0876	0.0423
A0A140LH11_K97k_1_1_97_97	A0A140LH11	A0A140LH11|F1R9N6|E7FAK0|A0A140LH34|E7F8J2|E7FAU1|A0A2R8Q0U0|X1WCD4	A0A140LH11_K97k_1_1_97_97	K97k	GTGASGSFkLNKK	0	0.481375	0.0767811	0.241377	0.370267	0.196068	0.53545	0.953205	1.96372e-05	0.0010116	0.46295	0.011434	0.0788933	0.737	1.3768	0.3096	0.945	-0.3373	0.5129	0.0757	0.58	0.032	0.3334	0.4975	-0.4873	-0.0924	-0.1929	-0.3734
A0A1D5NS25_K211k_1_1_211_211	A0A1D5NS25	E9QDI4|A0A1D5NS25	A0A1D5NS25_K211k_1_1_211_211	K211k	QkYEVISLR	0	1.11769	0.00265924	0.035068	0.6645	0.0481777	0.276527	-0.575285	0.0009566	0.009564	-1.19857	1.83488e-06	0.000430924	1.3041	0.7004	0.5048	1.078	-0.3225	-0.0446	0.2645	-0.01	0.0473	-0.6999	NA	-0.0604	-0.7636	-0.7885	-1.1823
A0A1D5NSC5_K624k_1_1_624_624	A0A1D5NSC5	A0A1D5NSC5	si:dkey-10f23.2	K624k	LCHEDSCGPCSLTSSIkCR	0	-0.456925	0.18696	0.390297	-0.000983333	0.997838	0.999235	-0.855556	0.0295189	0.0873848	0.187256	0.628125	0.818693	-0.0427	0.4385	0.7475	0.7531	-0.1824	0.1324	0.6316	0.5102	0.1798	1.3526	1.6815	0.1606	0.68	-0.0639	0.0027
A0A1D5NSQ6_K709k_1_1_709_709	A0A1D5NSQ6	A0A1D5NSQ6	A0A1D5NSQ6_K709k_1_1_709_709	M706m K709k	SPLPPRLmEEkHIFPPPK	0	-0.5072	0.572299	0.743763	-1.00293	0.133465	0.455979	-1.15587	0.176729	0.299684	0.058726	0.947419	0.97869	0.0337	NA	0.6376	0.4744	-2.0362	0.4274	0.8166	NA	NA	NA	0.8891	NA	0.6599	0.8321	0.7246
A0A1D5NSV3_K1169k_1_0_1164_1169	A0A1D5NSV3	A0A1D5NSV3	si:dkey-38l22.2	K1169k	KQTTGkTALYTISSGGSK	1	-0.578575	0.113988	0.297943	-0.314975	0.410981	0.734696	0.62718	0.000392695	0.00561074	0.298656	0.0565584	0.213766	-0.0091	0.2795	-0.9409	-0.0534	-0.2529	0.2638	0.4694	0.3105	0.9147	-0.0117	0.3769	1.4065	0.4318	0.1947	-0.1327
A0A1D5NT24_K283k_1_1_283_283	A0A1D5NT24	A0A1D5NT24|A0A1D5NSQ9|A0A0R4IVX1	adam10a	K283k	IkINTTIDEK	0	-0.290975	0.319766	0.534656	0.408492	0.200965	0.541068	0.184905	0.180617	0.303766	-0.151482	0.302623	0.558803	-0.4268	0.5401	-0.3103	-0.0176	0.2712	0.0322	-0.356	0.8793	-0.0076	-0.0562	0.1338	-0.0131	-0.2563	-0.6979	-0.7368
A0A1L1QZF2_K219k_1_1_219_219	A0A1L1QZF2	A0A1L1QZF2	taldo1	K219k	TYEPHEDPGVLSVTkIYNYYK	0	1.09445	0.0660851	0.226153	-0.1722	0.776802	0.935465	-0.021004	0.851643	0.900487	0.0484158	0.690537	0.854046	0.4035	0.3031	0.5178	0.712	-1.1074	0.6343	0.807	-0.9998	-2.0309	0.0165	0.5728	-0.9895	0.6086	0.8484	0.6665
A0A1L1QZF2_K67k_1_1_67_67	A0A1L1QZF2	A0A1L1QZF2	taldo1	K67k	MPAYQPLVDQAIkYGTANGGTEDEQVTNAMDK	0	-0.621575	0.0359483	0.157281	-0.0693833	0.815104	0.948176	-0.021004	0.851643	0.900487	0.0484158	0.690537	0.854046	-0.4036	-0.7028	-0.928	-0.2391	0.6413	0.2395	0.5099	0.0197	-0.2821	0.7717	-0.2965	0.7439	0.9106	0.2833	0.194
A0A1L1QZG0_K45k_1_1_45_45	A0A1L1QZG0	A0A1L1QZG0	cct2	K45k	STLGPkGMDK	0	-0.744275	0.0816519	0.249625	-0.474767	0.287805	0.637336	1.06981	0.00194658	0.0149214	0.961774	0.00669503	0.056298	0.0565	0.078	0.4855	-0.3455	0.2296	-1.1251	-0.0596	1.4387	1.287	0.9559	-0.43	0.6644	-0.3357	0.0064	0.2905
A0A286Y868_K91k_1_1_91_91	A0A286Y868	A0A286Y868|E9QH70	tnni4b.1	K91k	VAkNEIEIQTLTQK	0	0.283983	0.398684	0.605633	-0.399233	0.241177	0.592633	-0.130618	0.647633	0.749806	-0.620399	0.0605339	0.223296	-0.0967	0.0642	0.2151	0.2568	-0.0747	-1.0173	-0.1417	0.1283	-0.168	-0.4827	NA	0.8628	-0.4115	-0.2393	-0.26
A0A286Y8C1_K344k_1_1_344_344	A0A286Y8C1	A0A286Y8C1|F1R6C8	ctnnd1	K344k	kGPAPTAWRQPELPEVIAMLNYR	0	NA	NA	NA	1.8777	0.00576773	0.0866306	0.100805	0.3334	0.468207	-0.0753235	0.49922	0.724383	-0.1727	NA	0.3614	-0.9558	NA	1.0348	0.0689	NA	NA	NA	NA	NA	NA	-1.3064	-1.3453
A0A286Y8C1_K384k_1_1_384_384	A0A286Y8C1	A0A286Y8C1|F1R6C8	ctnnd1	K384k	SNAAAYLQHLTFkNDK	0	0.09845	0.832973	0.917128	0.350908	0.489695	0.789153	0.100805	0.3334	0.468207	-0.0753235	0.49922	0.724383	0.045	0.0747	-0.2157	-0.2572	0.2996	1.2719	0.1494	-0.7997	-1.321	0.5499	0.8238	-0.8491	0.6616	0.6734	0.405
A0A286Y8C1_K606k_1_1_606_606	A0A286Y8C1	A0A286Y8C1|F1R6C8	ctnnd1	K606k	YLESIPVNQGPLPSQkGGCFSSR	0	-0.7195	0.0145103	0.0944202	-0.555567	0.0670365	0.329948	0.100805	0.3334	0.468207	-0.0753235	0.49922	0.724383	-0.046	-0.2203	-0.1942	-0.6792	0.2323	0.2482	-0.8485	0.067	0.3822	0.5677	0.7214	0.5467	0.5002	0.1887	0.496
A0A286Y8C1_K624k_1_1_624_624	A0A286Y8C1	A0A286Y8C1|F1R6C8	ctnnd1	K624k	GkREDDGTSDTIDIPK	0	0.104325	0.733132	0.858068	-0.0776583	0.814034	0.948161	0.100805	0.3334	0.468207	-0.0753235	0.49922	0.724383	0.075	-0.1671	-0.1089	-0.0154	0.1262	0.4013	-0.4124	0.479	0.2496	-0.2618	-1.1005	0.4283	-0.0724	0.15	-0.0418
A0A286Y8C1_K638k_1_1_638_638	A0A286Y8C1	A0A286Y8C1|F1R6C8	ctnnd1	K638k	GKREDDGTSDTIDIPkR	0	-0.731875	0.0225045	0.122123	0.0544083	0.851665	0.959121	0.100805	0.3334	0.468207	-0.0753235	0.49922	0.724383	-0.2207	-0.4039	0.4193	-0.1154	0.3402	-0.3011	-0.0591	0.5033	0.8436	0.6082	NA	0.0183	-0.4298	-0.3777	0.5449
A0A286Y8C1_K644k_1_1_644_644	A0A286Y8C1	A0A286Y8C1|F1R6C8	ctnnd1	K644k	RTTPAkGYELLFQPEVVR	0	-0.21935	0.485067	0.681437	0.190817	0.542748	0.821371	0.100805	0.3334	0.468207	-0.0753235	0.49922	0.724383	0.3424	-0.4005	0.712	0.1243	-0.1741	0.2735	0.2944	0.371	0.0337	0.837	NA	-0.5836	0.0306	-0.0062	0.321
A0A286Y8C1_K666k_1_1_666_666	A0A286Y8C1	A0A286Y8C1|F1R6C8	ctnnd1	K666k	ESkNPSVLEAAAGAVQNLCAGR	0	NA	NA	NA	-0.08055	0.873706	0.967354	0.100805	0.3334	0.468207	-0.0753235	0.49922	0.724383	NA	1.0582	0.6369	0.5326	NA	NA	-0.5612	NA	NA	NA	NA	NA	NA	-0.1211	-0.8402
A0A286Y9F1_K201k_1_1_201_201	A0A286Y9F1	A0A286Y9F1	cltb	K201k	LCDFNPkTSR	0	-0.173675	0.508558	0.700019	0.03685	0.895936	0.977209	0.508242	0.0763913	0.168045	-0.0119238	0.967251	0.985591	0.2449	-0.4591	0.3505	0.1372	0.4872	-0.046	0.2119	0.0902	0.3227	0.5483	0.007	0.6876	0.1338	-0.3576	0.2596
A0A286Y9N0_K166k_1_1_166_166	A0A286Y9N0	A0A286Y9N0	A0A286Y9N0_K166k_1_1_166_166	K166k	ETGYNMIHFTPLQkLGMSK	0	1.87387	0.00691422	0.0618838	0.266567	0.532479	0.814183	0.391065	0.0299768	0.0880629	0.330664	0.0786913	0.259346	-0.581	-0.1869	-1.0164	-0.609	-0.8704	0.8361	0.6145	NA	NA	-2.4722	NA	NA	0.1323	-0.1535	-0.1983
A0A286Y9W0_K774k_1_1_774_774	A0A286Y9W0	A0A286Y9W0	itgb1a	K774k	MNAkWDTTENPIYK	0	0.679175	0.0263137	0.133404	-0.223925	0.463837	0.770235	-0.127684	0.572389	0.689345	-0.0961975	0.692791	0.855166	0.9379	0.815	0.6879	0.6189	-0.5872	0.19	0.0447	0.5733	0.5621	-0.6358	-0.1566	0.4007	0.1179	-0.0181	-0.0748
A0A286Y9Z9_K163k_1_1_163_163	A0A286Y9Z9	B7ZDD1|A0A286Y9Z9|A0A2R8QK11|F1QKW9|A0A286YAZ9|A0A2R8QRD0|A0A2R8QHW2|A8WGP5	si:ch211-200p22.4	K163k	TMNTEkLIK	0	0.235	0.669537	0.813349	-0.87275	0.0562391	0.300597	0.283097	0.0998735	0.201997	-0.0237312	0.892652	0.955326	NA	0.0274	0.0177	NA	0.3707	-1.4491	-1.327	-0.279	-0.1459	NA	NA	0.5904	-0.1944	-0.1542	0.042
A0A286Y9Z9_K343k_1_1_343_343	A0A286Y9Z9	B7ZDD1|A0A286Y9Z9	si:ch211-200p22.4	K343k	LQALkNQR	0	-0.177467	0.507228	0.699375	0.488933	0.0817117	0.360943	0.283097	0.0998735	0.201997	-0.0237312	0.892652	0.955326	0.6837	0.6473	0.1653	0.4769	-0.0727	0.0843	0.0971	1.116	0.7436	0.1527	NA	-0.4834	-0.763	-0.5213	-0.0431
A0A286YAZ1_K103k_1_1_103_103	A0A286YAZ1	A0A286YAZ1|A0A2R8Q7H5|F1QUM3	A0A286YAZ1_K103k_1_1_103_103	K103k	EVQGHESkAFLGYFK	0	0.256875	0.433303	0.636756	0.669858	0.0708438	0.340341	0.381984	0.0114567	0.0458498	0.0949436	0.5095	0.734091	0.5743	1.0764	0.9085	0.7978	0.1111	0.2292	0.5109	0.0465	0.1383	1.0025	1.1422	-1.2883	-0.3159	0.022	0.0377
A0A286YAZ1_K110k_1_1_110_110	A0A286YAZ1	A0A286YAZ1|A0A2R8Q7H5|F1QUM3	A0A286YAZ1_K110k_1_1_110_110	K110k	AFLGYFkK	0	0.34055	0.259619	0.472208	0.628617	0.0636243	0.320954	0.381984	0.0114567	0.0458498	0.0949436	0.5095	0.734091	0.4055	1.4	0.8245	0.9892	-0.0421	0.235	0.4373	0.2867	0.0735	0.834	1.0628	-0.3013	-1.0646	-0.1324	-0.1759
A0A286YAZ1_K111k_1_1_111_111	A0A286YAZ1	A0A286YAZ1|A0A2R8Q7H5	A0A286YAZ1_K111k_1_1_111_111	K111k	kGLQYMQGGVASGFK	0	0.36685	0.172713	0.375207	0.0818	0.771645	0.932669	0.381984	0.0114567	0.0458498	0.0949436	0.5095	0.734091	0.5476	-0.0322	0.822	0.2957	0.149	-0.192	0.4975	-0.2603	0.3093	0.212	-0.0953	-0.3127	-0.0844	0.1063	0.5696
A0A286YAZ1_K187k_1_1_187_187	A0A286YAZ1	A0A286YAZ1|A0A2R8Q7H5	A0A286YAZ1_K187k_1_1_187_187	K187k	LkATQLAK	0	-0.000125	0.999512	0.999512	-0.1204	0.58698	0.848783	0.381984	0.0114567	0.0458498	0.0949436	0.5095	0.734091	0.0375	0.4059	0.4211	0.2673	0.1243	0.0277	0.1609	0.6599	0.4886	0.1098	-0.126	0.2648	0.2978	0.131	0.2052
A0A286YAZ1_K193k_1_1_193_193	A0A286YAZ1	A0A286YAZ1|A0A2R8Q7H5|F1QUM3	A0A286YAZ1_K193k_1_1_193_193	K193k	ATQLAkGIRDNER	0	-0.0433	0.921947	0.965384	0.372592	0.439653	0.755469	0.381984	0.0114567	0.0458498	0.0949436	0.5095	0.734091	-0.4048	-0.4303	-0.6424	-0.6962	0.3661	0.9284	-0.2548	0.2597	-0.3332	0.2139	-2.1409	0.4113	0.0612	-0.4798	-0.0968
A0A286YAZ1_K308k_1_1_308_308	A0A286YAZ1	A0A286YAZ1|F1QUM3	A0A286YAZ1_K308k_1_1_308_308	K308k	AAMkAADEFIK	0	1.26602	0.00056384	0.0143906	0.733467	0.0338624	0.23057	0.381984	0.0114567	0.0458498	0.0949436	0.5095	0.734091	0.4273	0.9116	0.3704	0.8655	0.1396	-0.0877	0.9965	-0.9761	-0.3415	-0.5492	-0.6225	0.2156	-0.1736	-0.8231	-0.7549
A0A286YAZ1_K315k_1_1_315_315	A0A286YAZ1	A0A286YAZ1|F1QUM3	A0A286YAZ1_K315k_1_1_315_315	K315k	AADEFIkK	0	-0.012325	0.958588	0.981202	0.180942	0.483981	0.788192	0.381984	0.0114567	0.0458498	0.0949436	0.5095	0.734091	0.0174	0.0406	0.1578	-0.0175	0.329	0.6332	-0.2009	0.4383	-0.0183	0.2545	-0.4269	0.2017	-0.0262	-0.1709	0.2867
A0A286YAZ4_K1613k_1_1_1613_1613	A0A286YAZ4	A0A286YAZ4|F1R966|E9QD79	cltca	K1613k	EYLSkVDKLETSESLRK	0	-1.0013	0.00628165	0.0588868	-0.00851667	0.975468	0.993504	0.177629	0.332554	0.467641	0.0816304	0.675427	0.846249	-0.3377	-0.5808	-0.9626	-0.2565	0.2758	0.0335	-0.3278	0.2951	0.6387	NA	NA	0.1234	0.3717	-0.4927	0.007
A0A286YAZ4_K450k_1_1_450_450	A0A286YAZ4	A0A286YAZ4|F1R966	cltca	K450k	QLLEkWLK	0	0.676958	0.106544	0.288888	0.00818333	0.983664	0.994328	0.177629	0.332554	0.467641	0.0816304	0.675427	0.846249	0.7781	-0.138	0.7657	0.1295	0.2269	-0.2754	0.0186	-0.7036	0.6814	-0.8572	NA	-0.0445	-0.429	-0.3191	0.72
A0A286YAZ4_K456k_1_0_453_456	A0A286YAZ4	A0A286YAZ4|F1R966|E9QD79|E9QBV1|A0A2R8PXZ0	cltca	K456k	WLKEDkLECSEELGDLVK	1	-0.568175	0.192388	0.396033	0.148008	0.691318	0.90001	0.177629	0.332554	0.467641	0.0816304	0.675427	0.846249	-0.2787	0.0724	-0.0229	-0.4093	-0.132	0.7304	-0.0376	NA	-0.0177	0.8348	NA	0.2671	-0.9413	0.4879	0.342
A0A286YBE9_K2196k_1_1_2196_2196	A0A286YBE9	A0A286YBE9|A0A2R8PZA9|A0A2R8RIJ1|A0A0R4INC4|A0A2R8PVX9|A0A2R8QEG3|E7F8G7|A0A2R8QLG6	A0A286YBE9_K2196k_1_1_2196_2196	K2196k	VkQIQAAEEEAAR	0	-0.51905	0.0923794	0.267247	-0.350775	0.242392	0.592829	0.934542	0.0066291	0.0322406	0.462339	0.162612	0.390564	-0.1109	-0.0978	0.4602	0.0463	-0.2048	-0.1621	-0.0822	1.0124	0.1153	0.6528	NA	0.4879	0.6565	-0.3774	0.0373
A0A286YBE9_K2881k_1_1_2881_2881	A0A286YBE9	A5WV02|A0A2R8PVX9|A0A2R8QEG3|E7F8G7|A0A2R8QLG6|A0A286YBE9|A0A2R8PZA9|A0A2R8RIJ1|A0A0R4INC4|A0A2R8QKW7	A0A286YBE9_K2881k_1_1_2881_2881	K2881k	GkTTVQELSK	0	-0.0984	0.752676	0.871658	0.406075	0.155855	0.486481	0.934542	0.0066291	0.0322406	0.462339	0.162612	0.390564	-0.2072	0.3557	-0.0958	-0.2369	-0.2527	0.4375	0.2421	-0.205	0.3097	NA	NA	0.0444	-0.1815	-0.7104	-0.2076
A0A286YBE9_K3723k_1_1_3723_3723	A0A286YBE9	E7F8G7|A0A2R8QLG6|A0A286YBE9|A0A2R8PZA9|A0A2R8RIJ1|A0A0R4INC4|A0A2R8QKW7	A0A286YBE9_K3723k_1_1_3723_3723	K3723k	GFTDPNKDENVTYkQLK	0	-0.320975	0.202322	0.407801	0.304467	0.259909	0.611587	0.934542	0.0066291	0.0322406	0.462339	0.162612	0.390564	0.4016	0.6688	0.1205	0.0486	0.3414	0.3527	0.1269	0.5817	1.2299	0.4766	0.2352	0.3404	-0.1748	-0.2762	-0.0126
A0A286YBE9_K4028k_1_1_4028_4028	A0A286YBE9	A0A2R8QLG6|A0A286YBE9|A0A2R8PZA9|A0A2R8RIJ1	A0A286YBE9_K4028k_1_1_4028_4028	K4028k	GYMNkETSER	0	-0.535125	0.0902853	0.264318	-0.469792	0.161837	0.496919	0.934542	0.0066291	0.0322406	0.462339	0.162612	0.390564	0.4731	0.425	0.5969	-0.2051	-0.0739	-0.4516	0.027	0.7141	0.0414	1.0483	1.6266	0.4903	0.2477	0.0844	0.3921
A0A286YBE9_K518k_1_1_518_518	A0A286YBE9	A5WV02|A0A2R8PVX9|A0A2R8QEG3|E7F8G7|A0A2R8QLG6|A0A286YBE9|A0A2R8PZA9|A0A2R8RIJ1	A0A286YBE9_K518k_1_1_518_518	K518k	FKETELPAkETDK	0	-1.04222	0.00928789	0.0736467	-0.834433	0.0159455	0.156909	0.934542	0.0066291	0.0322406	0.462339	0.162612	0.390564	-0.48	0.207	-0.5336	-0.8723	-0.3856	0.063	-0.9342	0.6987	0.5463	NA	NA	0.7859	0.2522	0.2233	0.4006
A0A286YBH9_K2304k_1_1_2304_2304	A0A286YBH9	A5WUQ7|A0A286YBH9	apobb.2	K2304k	IkYSFDHPDSRGGGDAENTLK	0	1.08272	0.00556459	0.0553104	-0.35935	0.296229	0.644773	0.183781	0.418683	0.551003	-0.116228	0.632922	0.822241	0.5099	0.2039	0.3974	0.6281	-0.655	0.1584	0.0373	-1.0283	-0.354	-0.5614	NA	-0.7464	0.5201	0.5641	0.4872
A0A286YBP4_K47k_1_1_47_47	A0A286YBP4	A0A286YBP4|F1QFV6	A0A286YBP4_K47k_1_1_47_47	K47k	QTYSTEPNNLkAR	0	0.14025	0.574615	0.745755	-0.91235	0.00218466	0.049632	0.750969	0.0626052	0.14689	0.337423	0.411824	0.656589	0.4872	0.7371	0.3859	0.3288	-0.3869	-0.671	-0.6788	0.6383	0.6001	-0.2049	NA	0.5677	0.4259	0.1802	0.16
A0A286YBP4_K86k_1_1_86_86	A0A286YBP4	A0A286YBP4	A0A286YBP4_K86k_1_1_86_86	K86k	SGQRkPASSYGK	0	-0.8068	0.0771765	0.241926	NA	NA	NA	0.750969	0.0626052	0.14689	0.337423	0.411824	0.656589	0.2561	1.31	1.2092	-0.2504	-1.361	-1.4593	-1.9618	1.1095	0.5708	1.9851	2.0867	NA	NA	NA	NA
A0A286YBP4_K98k_1_1_98_98	A0A286YBP4	A0A286YBP4|F1QFV6	A0A286YBP4_K98k_1_1_98_98	K98k	ITINkNSR	0	-0.215708	0.449269	0.651745	-0.375125	0.197222	0.53581	0.750969	0.0626052	0.14689	0.337423	0.411824	0.656589	0.5516	0.4924	0.3093	0.6736	-0.0786	-0.0655	-1.0004	1.0517	0.9119	0.2037	NA	0.2285	-0.0101	-0.1017	-0.1422
A0A2R8PV64_K5k_1_1_5_5	A0A2R8PV64	X1WFZ2|A0A2R8PV64|B3DFQ1	A0A2R8PV64_K5k_1_1_5_5	K5k	MFMTkIIK	0	0.0932	0.861124	0.932295	-0.020825	0.949984	0.99029	0.28107	0.0976679	0.199168	-0.189124	0.286148	0.540985	-0.6267	0.3147	NA	NA	0.3525	-0.0681	-0.4389	NA	-0.2492	NA	NA	0.2289	-0.51	-0.0212	0.1796
A0A2R8PVJ3_K106k_1_1_106_106	A0A2R8PVJ3	A0A2R8PVJ3	A0A2R8PVJ3_K106k_1_1_106_106	K106k	IkDIAWTEDSK	0	NA	NA	NA	0.8849	0.0809456	0.360216	0.346003	0.0697941	0.158593	0.140421	0.470667	0.703131	-0.0354	-0.3513	0.1673	NA	-0.5862	1.117	NA	NA	NA	NA	NA	-0.8191	-0.1046	-1.0445	-0.5098
A0A2R8PVJ3_K38k_1_1_38_38	A0A2R8PVJ3	A0A2R8PVJ3	A0A2R8PVJ3_K38k_1_1_38_38	K38k	GNNFLYTNGkSVIIR	0	-0.724075	0.0478271	0.189964	0.630025	0.103107	0.40207	0.346003	0.0697941	0.158593	0.140421	0.470667	0.703131	-0.3487	-0.2767	-0.459	-0.5108	0.5368	1.441	-0.2375	0.4591	-0.2059	0.7322	0.3157	0.6407	-0.3224	-0.5283	0.0103
A0A2R8PVL4_K310k_1_1_310_310	A0A2R8PVL4	A0A2R8PYK7|A0A2R8PVL4|A0A0R4IPN9	fnbp1b	K310k	TLWPFIkK	0	-0.104925	0.759816	0.875417	0.933892	0.0214607	0.182852	0.607755	0.00355525	0.0213315	0.27797	0.155785	0.382585	-0.0042	1.1803	0.9178	1.1648	-0.0135	0.2093	0.0231	0.1726	0.7165	1.4072	1.3821	-0.3357	-0.7019	-1.4856	-0.9205
A0A2R8PVL4_K502k_1_1_502_502	A0A2R8PVL4	A0A2R8PYK7|A0A2R8PVL4|A0A0R4IPN9|A0A0R4IPU0	fnbp1b	K502k	MPVkSDTSR	0	-0.275958	0.391437	0.600203	0.0522667	0.869384	0.966033	0.607755	0.00355525	0.0213315	0.27797	0.155785	0.382585	0.5305	-1.0578	0.1682	0.1658	0.0459	-0.0979	0.09	0.2901	0.3788	0.014	NA	-0.2306	-0.1581	0.12	0.1103
A0A2R8PW20_K71k_1_1_71_71	A0A2R8PW20	A0A2R8Q4D0|F1RDR1|A0A2R8PZ81|A0A2R8PW20	tnpo2	K71k	SLSGLILkNNVK	0	-0.540325	0.0222033	0.120999	-0.159517	0.496706	0.793518	0.204813	0.115595	0.223643	-0.0546798	0.68342	0.850719	-0.1866	0.0142	-0.5083	-0.2574	0.3336	0.1274	0.0644	0.2052	0.412	0.5293	0.0767	0.7967	0.3313	0.0059	0.2047
A0A2R8PWM9_K101k_1_1_101_101	A0A2R8PWM9	A0A2R8PWM9|Q6IQ92	A0A2R8PWM9_K101k_1_1_101_101	K101k	EITDLNIkITELR	0	0.553208	0.117212	0.301446	-0.228175	0.50242	0.795457	-0.71624	0.00116184	0.0107964	-0.399415	0.0516144	0.201431	0.3418	0.0516	0.1091	0.8174	0.1524	-0.3924	0.4272	0.2443	-0.8018	-0.1122	NA	-0.2214	0.0714	0.8599	0.4524
A0A2R8PWM9_K87k_1_1_87_87	A0A2R8PWM9	A0A2R8PWM9|Q6IQ92	A0A2R8PWM9_K87k_1_1_87_87	K87k	IDVVDEERYDIAAkVSK	0	1.4988	0.000993631	0.0203404	-1.202	0.0122024	0.133209	-0.71624	0.00116184	0.0107964	-0.399415	0.0516144	0.201431	-0.2538	-1.0598	-0.7487	0.577	-0.7471	0.5585	0.108	-1.3938	-1.648	-2.1807	-2.258	NA	1.1756	1.3311	1.0187
A0A2R8PX02_K544k_1_1_544_544	A0A2R8PX02	Q90YM8|A0A2R8PX02|B3DIT1|F1QE65|A5A5E1	A0A2R8PX02_K544k_1_1_544_544	K544k	GGFDIkVPR	0	0.135225	0.564749	0.737829	-0.134758	0.594938	0.851647	-0.00838497	0.91819	0.947626	-0.289996	0.00527655	0.0482331	0.5449	0.2478	0.1934	0.6038	-0.3601	-0.6148	0.2704	0.1799	0.2427	0.4061	0.2203	0.364	-0.255	-0.1643	-0.345
A0A2R8PXK4_K718k_1_1_718_718	A0A2R8PXK4	A0A2R8PXK4|Q1LX72	synm	K718k	TTkPYETDFAK	0	NA	NA	NA	0.171533	0.669522	0.892861	1.30953	2.88863e-06	0.000339253	0.946724	0.000157403	0.00570337	NA	NA	0.4479	-0.083	-0.32	0.3831	-0.7949	NA	NA	NA	NA	-0.3464	0.048	-0.948	NA
A0A2R8PXK4_K891k_1_1_891_891	A0A2R8PXK4	A0A2R8PXK4|Q1LX72	synm	K891k	EELAFFTkGR	0	-0.490125	0.0861401	0.257379	0.243933	0.410768	0.734696	1.30953	2.88863e-06	0.000339253	0.946724	0.000157403	0.00570337	-0.2171	-0.3442	-0.3593	0.6324	0.161	0.6897	0.581	0.5221	0.4976	0.4049	0.2477	-0.3238	0.3138	0.725	0.2182
A0A2R8PXU1_K141kK145k_2_2_141_145	A0A2R8PXU1	A0A2R8PXU1|A0A2R8QKF0|Q6NXA3	gtf2e2	K141k K145k	PkYHLkDK	0	2.72342	0.00505875	0.0521672	1.2997	0.0814465	0.360775	-2.29741	0.0522779	0.129144	-0.833091	0.485541	0.715504	1.4536	1.5905	0.4779	2.2769	NA	1.5805	-0.2034	NA	NA	-1.2737	NA	-0.4653	NA	NA	-0.757
A0A2R8PYN1_K180k_1_1_180_180	A0A2R8PYN1	A0A2R8Q3A3|A0A2R8PYN1|Q7ZU67	A0A2R8PYN1_K180k_1_1_180_180	K180k	FLSSkYIK	0	-0.8987	0.0203062	0.114432	1.13948	0.00816108	0.10367	0.364382	0.0263522	0.080776	-0.120532	0.456101	0.691073	-0.8985	0.3647	-0.282	0.1438	0.3855	0.9406	0.3209	0.6501	0.7588	0.5034	1.0105	0.1414	-0.1838	-1.5219	-0.7976
A0A2R8PYT0_K36k_1_1_36_36	A0A2R8PYT0	A0A2R8PYT0|F1R6E5	rad23b	K36k	GkDGFPVAGQK	0	0.4331	0.121855	0.307434	0.958183	0.00428977	0.0722197	0.131444	0.0916071	0.190312	0.0653356	0.416715	0.660188	0.1824	0.5313	0.3404	0.8414	0.3213	0.4753	0.1788	-0.3218	-0.0876	0.546	0.0265	0.0214	-0.6084	-1.1195	-0.8257
A0A2R8PYT0_K51k_1_1_51_51	A0A2R8PYT0	A0A2R8PYT0|F1R6E5	rad23b	K51k	LIYAGkILSDDTALK	0	0.084275	0.849966	0.926555	-0.0945833	0.844186	0.956096	0.131444	0.0916071	0.190312	0.0653356	0.416715	0.660188	0.0934	-0.9335	-0.1205	-0.3756	0.4772	-0.4386	0.6849	-0.1207	0.2968	-1.0854	-0.764	-0.7382	-0.1342	0.9733	1.2421
A0A2R8PYT0_K60k_1_1_60_60	A0A2R8PYT0	A0A2R8PYT0|F1R6E5	rad23b	K60k	ILSDDTALkEYK	0	0.463075	0.219361	0.42875	-0.1977	0.619805	0.868871	0.131444	0.0916071	0.190312	0.0653356	0.416715	0.660188	-0.6234	-0.6154	-0.3831	0.3294	0.2088	0.1889	-0.3257	-0.1666	-0.3233	-1.1262	-1.5287	0.8803	0.5985	-0.4673	-0.1247
A0A2R8PYT0_K67k_1_1_67_67	A0A2R8PYT0	A0A2R8PYT0|F1R6E5|Q1L8N2	rad23b	K67k	IDEkNFVVVMVTKPK	0	0.795	0.056489	0.207686	0.571383	0.189368	0.528815	0.131444	0.0916071	0.190312	0.0653356	0.416715	0.660188	0.2072	-0.427	0.2194	0.3914	0.1703	1.0668	0.6398	-0.473	-0.584	-0.6378	-1.0942	-1.3731	0.4881	0.4515	0.6505
A0A2R8PYT0_K76k_1_1_76_76	A0A2R8PYT0	A0A2R8PYT0|F1R6E5	rad23b	K76k	NFVVVMVTkPK	0	1.14365	0.0248617	0.129499	1.03846	0.0535337	0.292314	0.131444	0.0916071	0.190312	0.0653356	0.416715	0.660188	0.8584	0.8779	0.979	1.2362	-0.577	1.1657	0.483	-0.4976	-0.9245	0.5999	0.1991	-2.0701	-0.077	-0.33	-0.2478
A0A2R8PZ91_K607k_1_1_607_607	A0A2R8PZ91	A0A0R4IMD1|A0A2R8PZ91|A0A0R4IP04|A0A0R4IYQ8	A0A2R8PZ91_K607k_1_1_607_607	K607k	DLkASSGR	0	0.434575	0.304556	0.51687	0.840392	0.0102906	0.119167	0.0320184	0.829997	0.884531	-0.091652	0.571493	0.782008	0.5543	-0.1587	-0.1255	-0.1426	0.2252	0.6276	-0.2094	-0.4027	NA	NA	NA	-0.9636	-0.5547	-0.4499	-0.5355
A0A2R8Q106_K709k_1_1_709_709	A0A2R8Q106	A0A2R8Q106|F1QPZ8	A0A2R8Q106_K709k_1_1_709_709	K709k	AkLPNLK	0	0.16435	0.49204	0.688056	0.0193167	0.939927	0.989668	-0.916891	0.167554	0.288523	-0.696568	0.322497	0.576428	0.4925	0.11	0.7422	0.4234	0.1004	0.5609	0.0838	0.3865	0.6066	0.0054	0.1122	-0.2788	0.3067	0.4608	0.4275
A0A2R8Q157_K336k_1_1_336_336	A0A2R8Q157	A0A2R8Q157|F1QN60|F1QEG3	A0A2R8Q157_K336k_1_1_336_336	K336k	LQkLIQLHAK	0	0.298042	0.359106	0.573526	0.545808	0.104359	0.403573	0.0516681	0.868805	0.912165	-0.367396	0.28765	0.542693	-0.2694	-0.2626	0.0673	-0.7538	1.0132	0.7931	0.2911	-1.2321	-0.3704	-0.2055	NA	0.6337	-0.1882	-0.1277	0.2955
A0A2R8Q1C6_K97k_1_1_97_97	A0A2R8Q1C6	P61485|A0A2R8Q736|A0A2R8Q1C6|A0A2R8RI07	A0A2R8Q1C6_K97k_1_1_97_97	K97k	DSLYAQGkR	0	-0.4521	0.188678	0.392434	-0.428375	0.211519	0.557499	0.616939	0.00110479	0.0103955	0.459107	0.0129921	0.0859949	0.5335	-0.7075	0.6543	0.0301	-0.1437	-1.0401	-0.7296	0.6717	0.6757	0.3917	NA	0.2222	-0.3461	-0.3012	-0.4126
A0A2R8Q1X2_K197k_1_1_197_197	A0A2R8Q1X2	A0A2R8Q1X2|E9QCX7|Q6PC12|P85001|F8W5U5	eno1a	K197k	NVIkEK	0	0.023325	0.937471	0.973593	0.941925	0.00925809	0.112167	0.429257	0.495012	0.620919	-0.670144	0.32881	0.581586	0.3906	0.3852	0.0244	0.2423	0.2447	0.6057	0.3892	0.9653	0.1876	-0.2269	0.0232	0.2805	-0.6303	-0.8622	-0.9029
A0A2R8Q1X2_K202k_1_1_202_202	A0A2R8Q1X2	A0A2R8Q1X2|E9QCX7|Q6PC12	eno1a	K202k	YGkDATNVGDEGGFAPNILENK	0	0.101125	0.810007	0.904544	0.27765	0.458558	0.768614	0.429257	0.495012	0.620919	-0.670144	0.32881	0.581586	0.1698	0.3119	-0.1143	-0.0833	0.6734	-0.2705	0.0996	-0.3233	0.2631	NA	NA	0.8886	-0.3983	-0.7535	-0.1774
A0A2R8Q1X2_K233k_1_1_233_233	A0A2R8Q1X2	A0A2R8Q1X2|E9QCX7|Q6PC12	eno1a	K233k	NAISkAGYTDK	0	-0.5601	0.0143281	0.0941562	-0.185125	0.410386	0.734696	0.429257	0.495012	0.620919	-0.670144	0.32881	0.581586	-0.1531	-0.007	-0.0852	0.2585	-0.1736	0.118	-0.4601	0.5624	0.2246	0.5623	0.9043	-0.0614	0.0779	0.1075	-0.0711
A0A2R8Q1X2_K256k_1_1_256_256	A0A2R8Q1X2	A0A2R8Q1X2|E9QCX7|Q6PC12	eno1a	K256k	GGkYDLDFK	0	0.891908	0.033719	0.151648	0.591425	0.14099	0.466479	0.429257	0.495012	0.620919	-0.670144	0.32881	0.581586	0.7533	-0.1161	0.2953	0.7914	0.3097	0.2633	0.2967	0.3522	-0.5099	-1.2251	NA	0.487	-0.2985	-0.595	-0.7996
A0A2R8Q1X2_K281k_1_1_281_281	A0A2R8Q1X2	A0A2R8Q1X2|E9QCX7|Q6PC12	eno1a	K281k	LADLYkSFVK	0	1.77978	0.0245963	0.129137	1.53394	0.00705633	0.095113	0.429257	0.495012	0.620919	-0.670144	0.32881	0.581586	0.285	0.7178	0.3789	1.1202	0.3319	-0.162	1.0915	NA	-1.1543	NA	NA	0.2506	-1.19	-1.8325	-1.682
A0A2R8Q1X2_K358k_1_1_358_358	A0A2R8Q1X2	A0A2R8Q1X2|Q6PC12	eno1a	K358k	VNQIGSVTESLQACkMAQTNGWGVMVSHR	0	-0.096875	0.84135	0.921481	-0.529317	0.319164	0.662842	0.429257	0.495012	0.620919	-0.670144	0.32881	0.581586	0.4357	-1.3072	0.0017	0.2574	-0.4822	0.4475	-0.5127	0.171	-0.8132	-0.4376	0.8549	-0.7957	0.9579	0.9475	0.2777
A0A2R8Q1X2_K426k_1_1_426_426	A0A2R8Q1X2	A0A2R8Q1X2|Q6PC89	eno1a	K426k	FAGkNFR	0	-0.89785	0.00289704	0.0373312	0.132492	0.634799	0.878261	0.429257	0.495012	0.620919	-0.670144	0.32881	0.581586	0.0485	-0.1499	0.0866	0.0521	0.4244	0.3385	0.0524	1.1889	0.8567	0.4877	1.0954	0.9085	0.0022	-0.2125	-0.1411
A0A2R8Q3B4_K413k_1_1_413_413	A0A2R8Q3B4	A0A2R8Q3B4|A0A2R8QAE3|A0A2R8Q555|X1WBL0	chd3	K413k	CTCPPIkGR	0	-0.2762	0.367228	0.579955	0.0631417	0.834397	0.953886	0.140023	0.295614	0.430589	-0.0565223	0.690357	0.854046	0.4157	-0.458	0.7557	0.285	0.0902	-0.6986	0.1076	0.663	0.3375	0.5769	NA	0.0877	-0.3712	-0.273	-0.3638
A0A2R8Q3C0_K2022k_1_1_2022_2022	A0A2R8Q3C0	X1WC87|A0A2R8Q3C0	piezo2a.2	K2022k	ELLMEkLR	0	0.307125	0.286366	0.495783	-0.616583	0.0576992	0.305013	-1.40143	0.0673457	0.154917	-0.170214	0.825735	0.923064	0.4771	0.2985	0.5076	0.6424	-0.0613	-0.0761	0.5954	-0.4588	0.2254	0.9205	0.01	0.5138	0.9923	0.5047	1.0662
A0A2R8Q3R9_K310k_1_0_308_310	A0A2R8Q3R9	F1QFS9|A0A2R8Q3R9	usp13	K310k	ISDWEVIQEAGLKLkPVYGSGYTGIK	1	0.252092	0.425172	0.62972	-0.0157	0.959926	0.991969	-0.357992	0.130193	0.243105	-1.28916	0.000129502	0.00522565	-0.0431	0.7518	-0.2083	-0.0295	0.4179	0.2212	0.0443	0.2713	-0.6938	0.0194	NA	-0.3213	0.489	0.3655	0.4408
A0A2R8Q3R9_K387k_1_1_387_387	A0A2R8Q3R9	F1QFS9|A0A2R8Q3R9	usp13	K387k	LGHGLLSGQYSKPPMkSELIEQVMK	0	-0.15845	0.664201	0.810731	-0.284842	0.381667	0.716895	-0.357992	0.130193	0.243105	-1.28916	0.000129502	0.00522565	-0.29	-0.614	-0.3356	-0.6802	0.3687	0.0327	-0.0608	NA	-1.0657	0.4227	NA	0.6665	0.0974	0.3203	0.5093
A0A2R8Q3R9_K410k_1_1_410_410	A0A2R8Q3R9	F1QFS9|A0A2R8Q3R9	usp13	K410k	GISPkMFK	0	0.956792	0.0120556	0.0842614	0.353275	0.305528	0.650682	-0.357992	0.130193	0.243105	-1.28916	0.000129502	0.00522565	0.9968	1.4788	0.376	1.0565	-0.4893	-0.0552	0.5241	0.3975	0.3054	-0.6422	NA	-0.0714	-0.5639	-0.2964	-0.5086
A0A2R8Q3R9_K413k_1_1_413_413	A0A2R8Q3R9	F1QFS9|A0A2R8Q3R9	usp13	K413k	MFkALVSK	0	0.530433	0.140579	0.333013	0.156833	0.651344	0.885262	-0.357992	0.130193	0.243105	-1.28916	0.000129502	0.00522565	0.7687	0.543	0.6281	0.5178	0.1666	-0.8735	0.8462	0.2629	0.4755	-0.4865	NA	-0.1345	-0.1973	0.005	-0.1148
A0A2R8Q3R9_K734k_1_1_734_734	A0A2R8Q3R9	A0A2R8Q3R9	usp13	K734k	ALkASNNNLER	0	-0.0707417	0.840457	0.921481	0.127183	0.717853	0.908788	-0.357992	0.130193	0.243105	-1.28916	0.000129502	0.00522565	0.5609	-0.504	0.2562	0.1254	-0.2001	-0.027	0.4774	0.939	-0.6625	0.2646	NA	-0.0048	0.0331	-0.1295	-0.0738
A0A2R8Q3R9_K80k_1_1_80_80	A0A2R8Q3R9	A0A2R8Q3R9	usp13	K80k	EkATGAAGGAIPR	0	-0.119442	0.599492	0.762776	-0.0103333	0.963582	0.991969	-0.357992	0.130193	0.243105	-1.28916	0.000129502	0.00522565	0.2351	0.2622	0.3159	-0.0059	0.1621	-0.3511	-0.1156	0.541	0.1126	0.3102	NA	-0.036	0.2403	-0.34	-0.2291
A0A2R8Q420_K198k_1_1_198_198	A0A2R8Q420	A0A2R8QEJ6|A0A2R8Q420|F1QV13	gga1	K198k	LIkEMVQEDQK	0	-0.343975	0.187669	0.390953	-0.072575	0.791131	0.940882	-0.16318	0.173847	0.296087	-0.0161353	0.897166	0.957571	-0.131	-0.1549	0.2546	0.1102	0.0629	0.5293	-0.2829	0.1838	0.075	0.6497	0.5463	0.4461	0.5655	-0.2896	-0.0193
A0A2R8Q420_K206k_1_1_206_206	A0A2R8Q420	A0A2R8QEJ6|A0A2R8Q420|F1QV13	gga1	K206k	EMVQEDQkR	0	-0.518875	0.105178	0.286934	-0.37745	0.263717	0.613827	-0.16318	0.173847	0.296087	-0.0161353	0.897166	0.957571	-0.7508	0.3327	0.5271	0.6738	-0.3539	-0.5675	0.1342	0.4541	1.1736	0.5817	0.6489	-0.1693	-0.0395	0.3857	0.2833
A0A2R8Q449_K1071k_1_1_1071_1071	A0A2R8Q449	A0A2R8Q449	A0A2R8Q449_K1071k_1_1_1071_1071	K1071k	IPDIkPTPSSK	0	0.020775	0.927043	0.968158	0.0494167	0.840279	0.956096	-0.402178	0.0448366	0.115968	-0.971061	0.000267922	0.0077575	0.0259	-0.5613	-0.2792	0.2104	0.0438	0.5878	0.0778	0.0306	0.0546	-0.3681	-0.4044	0.0242	0.3847	0.2129	0.1264
A0A2R8Q449_K131k_1_1_131_131	A0A2R8Q449	A0A2R8Q449	A0A2R8Q449_K131k_1_1_131_131	K131k	LDVVTYYDDLEAEGkAPGPPSK	0	0.3918	0.32015	0.534845	-0.466892	0.185859	0.525723	-0.402178	0.0448366	0.115968	-0.971061	0.000267922	0.0077575	-0.6819	-1.0444	-1.4559	-0.8158	-0.2386	-0.2857	0.5247	-1.3775	-1.4051	NA	NA	-0.3103	1.1126	0.4879	0.5779
A0A2R8Q449_K177k_1_1_177_177	A0A2R8Q449	A0A2R8Q449	A0A2R8Q449_K177k_1_1_177_177	K177k	VNTkVPIR	0	0.162375	0.527014	0.712045	0.885958	0.00324437	0.0638517	-0.402178	0.0448366	0.115968	-0.971061	0.000267922	0.0077575	-0.2321	0.5255	-0.5382	0.1259	0.7084	0.553	0.6227	-0.1668	-0.0683	-0.3412	NA	-0.2463	0.0128	-0.4359	-0.3623
A0A2R8Q449_K17k_1_1_17_17	A0A2R8Q449	A0A2R8Q449	A0A2R8Q449_K17k_1_1_17_17	K17k	APGAPMDIkIHDANR	0	0.1383	0.720155	0.848165	-0.0178667	0.965748	0.991969	-0.402178	0.0448366	0.115968	-0.971061	0.000267922	0.0077575	-0.6347	0.0225	-0.3815	0.3993	0.2065	-0.1381	0.1414	0.1498	0.5561	-0.5745	-1.279	0.9203	-0.0466	-0.21	-0.3125
A0A2R8Q449_K382k_1_1_382_382	A0A2R8Q449	A0A2R8Q449	A0A2R8Q449_K382k_1_1_382_382	K382k	QPIHSGGAEVTDYYIDkCNVAK	0	0.363625	0.236786	0.450348	-0.3509	0.252787	0.603464	-0.402178	0.0448366	0.115968	-0.971061	0.000267922	0.0077575	-0.2035	-1.1157	-0.3236	-1.3367	0.1568	-0.0294	0.22	-1.3575	-0.7466	-1.2214	NA	0.3722	0.3254	0.3381	0.8311
A0A2R8Q449_K404k_1_1_404_404	A0A2R8Q449	A0A2R8Q449	A0A2R8Q449_K404k_1_1_404_404	K404k	ERLHkVGGLTAGSVYQFR	0	0.39265	0.149913	0.346412	0.487608	0.0793438	0.358269	-0.402178	0.0448366	0.115968	-0.971061	0.000267922	0.0077575	0.6262	0.9859	0.8957	0.6908	0.3217	-0.6276	0.0933	0.7367	0.26	0.2243	NA	-0.7267	-0.7731	-0.3987	-0.3354
A0A2R8Q449_K604k_1_1_604_604	A0A2R8Q449	A0A2R8Q449	A0A2R8Q449_K604k_1_1_604_604	K604k	kSYQEITDFSK	0	1.05383	0.000838627	0.018222	1.11494	0.000996987	0.0317053	-0.402178	0.0448366	0.115968	-0.971061	0.000267922	0.0077575	0.7019	0.4597	0.1436	-0.0003	0.8621	0.8757	0.5928	-0.0087	-0.7886	-1.0127	-1.1004	-0.1862	-0.4827	-0.5561	-0.1273
A0A2R8Q449_K619k_1_1_619_619	A0A2R8Q449	A0A2R8Q449	A0A2R8Q449_K619k_1_1_619_619	K619k	GIAVkTSGSNSTLLFK	0	0.77035	0.0120142	0.084121	1.08641	0.00200903	0.0470494	-0.402178	0.0448366	0.115968	-0.971061	0.000267922	0.0077575	0.4544	1.2931	1.1175	0.9387	0.383	0.536	0.2559	0.7877	0.4555	-0.1273	-0.3936	-0.5921	-0.9775	-0.8007	-0.4088
A0A2R8Q449_K684k_1_1_684_684	A0A2R8Q449	A0A2R8Q449	A0A2R8Q449_K684k_1_1_684_684	K684k	TELAYkILER	0	0.758342	0.0498133	0.194725	-0.106117	0.76838	0.931683	-0.402178	0.0448366	0.115968	-0.971061	0.000267922	0.0077575	0.4255	-0.2774	-0.474	-0.3282	0.1812	0.2938	0.0144	-0.4822	-0.4582	-1.8252	NA	-0.1967	0.5344	0.0187	0.7206
A0A2R8Q449_K68k_1_1_68_68	A0A2R8Q449	A0A2R8Q449	A0A2R8Q449_K68k_1_1_68_68	K68k	ICkYPVQGLFEGHSYYFR	0	0.828433	0.0072967	0.0641461	1.01968	0.00173011	0.0429124	-0.402178	0.0448366	0.115968	-0.971061	0.000267922	0.0077575	0.4795	0.6592	1.0138	0.5031	0.0861	0.7362	0.6054	-0.266	-0.3185	0.0909	NA	-1.0084	-0.702	-0.3345	-0.1302
A0A2R8Q449_K820k_1_1_820_820	A0A2R8Q449	A0A2R8Q449	A0A2R8Q449_K820k_1_1_820_820	K820k	ESAFHWYkDDVEVIPEVPADLTSGVCK	0	0.854525	0.00833979	0.069253	1.07599	0.00171573	0.0428116	-0.402178	0.0448366	0.115968	-0.971061	0.000267922	0.0077575	0.3521	-0.314	-0.7906	-0.8682	1.0237	0.9895	0.6348	-1.4393	-1.3473	-0.9925	NA	-0.2079	-0.1149	-0.2707	-0.1798
A0A2R8Q449_K847k_1_1_847_847	A0A2R8Q449	A0A2R8Q449	A0A2R8Q449_K847k_1_1_847_847	K847k	FPLTNFSkNDVGLYK	0	0.0355	0.906043	0.956141	0.125767	0.699319	0.902291	-0.402178	0.0448366	0.115968	-0.971061	0.000267922	0.0077575	0.2582	0.2741	-0.4741	-0.1303	-0.0658	0.3147	0.7704	0.3125	0.2814	0.1802	-0.9882	0.2132	0.1084	0.2628	0.2716
A0A2R8Q449_K910k_1_1_910_910	A0A2R8Q449	A0A2R8Q449	A0A2R8Q449_K910k_1_1_910_910	K910k	EAkISASER	0	-0.265775	0.257651	0.470869	-0.161425	0.485371	0.788192	-0.402178	0.0448366	0.115968	-0.971061	0.000267922	0.0077575	0.1696	-0.2431	-0.4349	-0.5095	0.2608	-0.0838	0.0978	0.1649	0.116	-0.247	NA	0.2756	0.0997	0.4595	0.1773
A0A2R8Q449_K94k_1_1_94_94	A0A2R8Q449	A0A2R8Q449	A0A2R8Q449_K94k_1_1_94_94	K94k	AVNSHGIGkPSR	0	0.79085	0.120565	0.305241	0.796125	0.0298503	0.217771	-0.402178	0.0448366	0.115968	-0.971061	0.000267922	0.0077575	0.2616	-0.3207	0.2703	-0.0862	0.4223	-0.5152	0.7529	NA	-0.7596	NA	NA	-0.7469	-0.5755	-0.8756	-0.1065
A0A2R8Q449_K950k_1_1_950_950	A0A2R8Q449	A0A2R8Q449	A0A2R8Q449_K950k_1_1_950_950	K950k	GMYTFEIVDAEkTHTR	0	-0.079925	0.753897	0.872051	0.480275	0.0958661	0.390545	-0.402178	0.0448366	0.115968	-0.971061	0.000267922	0.0077575	0.2936	0.8069	-0.0465	0.7066	-0.2756	0.247	0.3544	0.3902	0.6352	0.3218	0.7331	-0.7647	-0.318	0.0764	-0.4804
A0A2R8Q449_K970k_1_1_970_970	A0A2R8Q449	A0A2R8Q449	A0A2R8Q449_K970k_1_1_970_970	K970k	GkVVGGLPDVVTIMEK	0	-0.18165	0.506635	0.699076	0.68245	0.0225838	0.189145	-0.402178	0.0448366	0.115968	-0.971061	0.000267922	0.0077575	0.0917	-0.1666	-0.3698	-0.0455	0.2878	0.4595	0.648	0.3959	-0.1005	-0.1181	NA	-0.7784	-0.1842	0.3592	-0.266
A0A2R8Q449_K984k_1_1_984_984	A0A2R8Q449	A0A2R8Q449	A0A2R8Q449_K984k_1_1_984_984	K984k	VVGGLPDVVTIMEkK	0	0.332383	0.583844	0.752342	-0.397083	0.513827	0.802987	-0.402178	0.0448366	0.115968	-0.971061	0.000267922	0.0077575	0.4213	-0.2615	-0.0699	-1.6229	-0.6789	0.1808	-0.03	NA	-1.3873	-0.8485	0.0889	-1.361	0.1076	1.1064	1.0312
A0A2R8Q483_K154k_1_1_154_154	A0A2R8Q483	A0A2R8Q9K7|A0A140LG50|A0A2R8Q483	vimr2	K154k	CLQMkCDQVVEHR	0	-0.969933	0.0047745	0.0511077	0.0156083	0.957824	0.991732	0.661629	0.0126614	0.0491726	0.0053698	0.982972	0.992828	-0.3777	0.4135	0.0328	-0.0094	-0.1951	-0.2458	-0.0495	1.307	0.2822	1.365	NA	-0.3803	0.0085	-0.4572	0.1127
A0A2R8Q483_K321k_1_1_321_321	A0A2R8Q483	A0A2R8Q9K7|A0A140LG50|A0A2R8Q483	vimr2	K321k	KHGDELESEVkAR	0	-1.27547	0.000154893	0.0068799	-0.401167	0.129959	0.448386	0.661629	0.0126614	0.0491726	0.0053698	0.982972	0.992828	-0.4378	-0.6824	-0.3766	-0.7919	0.1895	-0.5588	-0.3452	1.13	0.5886	0.3913	NA	0.0263	0.274	0.3335	0.0182
A0A2R8Q483_K55k_1_1_55_55	A0A2R8Q483	A0A2R8Q9K7|A0A140LG50|A0A2R8Q483	vimr2	K55k	ALNkEGASR	0	-0.219275	0.599655	0.762776	-0.40995	0.332344	0.677354	0.661629	0.0126614	0.0491726	0.0053698	0.982972	0.992828	0.2642	0.1486	0.477	0.3287	0.3061	-1.4621	-0.0668	1.1504	0.478	-0.0567	NA	-0.624	-0.2056	0.3897	0.4493
A0A2R8Q4J6_K98k_1_1_98_98	A0A2R8Q4J6	A0A2R8Q4J6	A0A2R8Q4J6_K98k_1_1_98_98	K98k	VLVNFEkVSVMEGDPVK	0	-0.3551	0.543068	0.722143	0.099975	0.800805	0.943598	-0.952783	0.130472	0.243105	0.395382	0.545609	0.760369	-0.8701	0.1392	-0.5306	0.3091	0.3626	0.6234	0.1876	NA	0.117	NA	NA	-0.2896	1.1419	-0.2159	0.5285
A0A2R8Q516_K1115k_1_0_1115_1116	A0A2R8Q516	A0A2R8Q516|A0A2R8RK01|A0A0R4IS53|A0A2R8QK98|E7F237	gapvd1	K1115k	TFSFSDIkK	1	-0.4248	0.176319	0.379085	0.175067	0.596207	0.852422	0.00340547	0.975593	0.982565	-0.00521972	0.965371	0.985591	-0.5723	-0.0385	-0.2206	0.07	0.3072	0.3636	-0.1276	0.401	0.3281	-0.3464	0.5551	0.5235	0.3866	-0.84	-0.0461
A0A2R8Q516_K24k_1_1_24_24	A0A2R8Q516	A0A2R8Q516|A0A2R8RK01	gapvd1	K24k	LYVASEkQLIQR	0	-0.2848	0.169547	0.37139	-0.274792	0.216902	0.563353	0.00340547	0.975593	0.982565	-0.00521972	0.965371	0.985591	0.2405	-0.2538	0.4243	0.3017	-0.0182	0.0546	-0.2136	0.4236	0.3797	0.4266	0.622	0.368	0.0541	0.0311	0.4097
A0A2R8Q516_K49k_1_1_49_49	A0A2R8Q516	A0A2R8Q516|A0A2R8RK01|A0A0R4IS53|A0A2R8QK98|Q6DH32|E7F237	gapvd1	K49k	AAWIAkQQR	0	-0.44475	0.137615	0.328312	0.104492	0.680353	0.896586	0.00340547	0.975593	0.982565	-0.00521972	0.965371	0.985591	0.1436	0.2892	-0.0402	0.6958	-0.0807	0.2866	0.0121	NA	0.5973	0.8364	NA	0.1883	0.2613	-0.2477	-0.3292
A0A2R8Q5H4_K210k_1_1_210_210	A0A2R8Q5H4	A0A2R8Q5H4|Q7ZYX7	A0A2R8Q5H4_K210k_1_1_210_210	K210k	DIkDTTVGTLSQR	0	-0.345475	0.285822	0.495057	-0.6734	0.064209	0.322549	0.583714	0.00010937	0.00265757	0.27512	0.0325645	0.150724	-0.4376	-0.0587	-0.3584	-0.6958	0.0703	-0.1795	-0.12	0.2857	0.3916	0.3055	-1.1514	0.5868	1.0151	0.1929	0.5932
A0A2R8Q5H4_K239k_1_1_239_239	A0A2R8Q5H4	A0A2R8Q5H4|Q7ZYX7	A0A2R8Q5H4_K239k_1_1_239_239	K239k	LLDIkSYLEK	0	0.838525	0.0212276	0.11745	0.197983	0.582383	0.847145	0.583714	0.00010937	0.00265757	0.27512	0.0325645	0.150724	0.0251	-0.0231	-0.0385	0.3057	0.4931	0.4782	-0.2083	-0.204	-0.508	-0.6485	-1.7244	0.6495	0.2797	-0.5029	-0.2009
A0A2R8Q5H4_K309k_1_1_309_309	A0A2R8Q5H4	A0A2R8Q5H4|Q7ZYX7	A0A2R8Q5H4_K309k_1_1_309_309	K309k	SVVALHNLINNkIANR	0	NA	NA	NA	-1.48103	0.0332442	0.228834	0.583714	0.00010937	0.00265757	0.27512	0.0325645	0.150724	NA	NA	NA	NA	-1.2975	NA	-1.5993	0.4024	0.8458	NA	NA	0.2789	1.3926	-1.0596	-0.4814
A0A2R8Q5H4_K45k_1_1_45_45	A0A2R8Q5H4	A0A2R8Q5H4|Q7ZYX7	A0A2R8Q5H4_K45k_1_1_45_45	K45k	VVGVLLGSWQkK	0	-0.538675	0.493918	0.68995	-0.381058	0.626975	0.873402	0.583714	0.00010937	0.00265757	0.27512	0.0325645	0.150724	0.6223	-0.1799	0.405	-0.1601	-1.415	0.1746	0.022	NA	-0.8313	0.8381	2.1247	-2.3227	0.7807	0.6137	0.828
A0A2R8Q5I2_K183k_1_1_183_183	A0A2R8Q5I2	A0A2R8Q5I2	vti1a	K183k	ETDANLGkSSR	0	-0.932	0.14644	0.341378	-0.827758	0.0279943	0.21216	-0.533422	0.0365734	0.101598	-0.00940905	0.970185	0.987224	-1.2627	NA	NA	NA	-0.824	-1.1563	-0.2491	NA	-0.3307	NA	NA	0.1353	0.3939	0.2689	-0.4596
A0A2R8Q5K7_K140k_1_1_140_140	A0A2R8Q5K7	F1Q5V8|A0A2R8Q5K7|Q52PJ7	dpysl5a	K140k	ACCDYALHMGVTWWGPkAR	0	-1.379	1.20279e-05	0.00216283	-0.126967	0.594435	0.851647	0.337214	0.0504718	0.126219	-0.105076	0.544404	0.75941	0.2675	-0.2801	-0.2411	-0.1927	0.1932	-0.4899	-0.1514	1.0011	1.2673	1.4955	1.3057	-0.3086	0.1985	-0.0536	0.0741
A0A2R8Q5P5_K423k_1_1_423_423	A0A2R8Q5P5	A0A2R8QBF8|A0A2R8Q5P5|Q1LUP1|Q1LUP2	A0A2R8Q5P5_K423k_1_1_423_423	K423k	FPLkLLQQR	0	-1.0678	0.0324851	0.149258	-0.333742	0.411912	0.734696	0.181327	0.152669	0.270456	0.0018123	0.988991	0.99386	-0.2283	-1.6572	-1.4093	-2.1432	0.2557	0.0475	0.4301	NA	-0.7468	0.1634	NA	0.1456	0.8009	0.5577	0.8085
A0A2R8Q5S0_K220k_1_1_220_220	A0A2R8Q5S0	A0A2R8Q5S0|A0A0R4IML0	A0A2R8Q5S0_K220k_1_1_220_220	K220k	DTDRHGkAQITNVNEGEETQEMLK	0	0.270275	0.244498	0.457796	0.9939	0.000524927	0.020375	0.249894	0.0777115	0.170323	0.102439	0.479807	0.711293	-0.1832	-0.4778	-0.5254	-0.4041	0.7415	0.9153	0.8458	-0.3415	-0.5227	-1.1395	NA	-0.1856	-0.2899	0.0103	-0.1736
A0A2R8Q650_K213k_1_1_213_213	A0A2R8Q650	A0A2R8Q650|Q803M1	tpm3	K213k	TLQASEEkYSQK	0	-0.560375	0.135348	0.324901	-0.780258	0.0258564	0.204958	0.420866	0.0151842	0.0555673	0.124055	0.458494	0.69305	-0.9474	-0.4975	-0.0867	-0.8419	0.0238	-0.7175	-0.423	NA	0.4822	-0.5482	NA	0.7098	0.3694	0.1059	0.447
A0A2R8Q6F8_K1146k_1_1_1146_1146	A0A2R8Q6F8	F1RCR6|A0A2R8Q6F8|F1Q529	trip12	K1146k	SPTTTQSPkSSFLASLNPK	0	-0.270925	0.268974	0.481682	0.233525	0.374143	0.710974	0.569553	0.120146	0.229163	0.124629	0.74133	0.88202	0.0905	0.6387	-0.1831	-0.1205	0.1501	0.6842	0.2076	0.3834	0.3151	0.339	0.4718	-0.3589	0.4768	0.1723	0.1649
A0A2R8Q6F8_K1160k_1_1_1160_1160	A0A2R8Q6F8	F1RCR6|A0A2R8Q6F8|F1Q529	trip12	K1160k	TWGkLGTQANSANSEPSR	0	-0.3928	0.548689	0.725473	0.217842	0.593083	0.85111	0.569553	0.120146	0.229163	0.124629	0.74133	0.88202	0.127	NA	NA	-0.722	0.3861	-0.274	-0.3588	NA	0.0953	NA	NA	0.6726	-0.5311	-0.7467	-0.5951
A0A2R8Q6L8_K212k_1_1_212_212	A0A2R8Q6L8	F1R881|A0A2R8Q6L8	skiv2l	K212k	NTkSEVNLLSLLSTFDDVLDAPPEDK	0	NA	NA	NA	-2.90983	0.000245553	0.013961	-0.747915	0.00142198	0.0122696	-0.367825	0.0885519	0.274845	-2.1875	NA	-2.0392	-2.3564	-1.7168	-0.5712	-2.477	NA	NA	NA	NA	NA	NA	1.074	1.569
A0A2R8Q6L8_K314k_1_1_314_314	A0A2R8Q6L8	F1R881|A0A2R8Q6L8	skiv2l	K314k	RIPDPAFkYPFELDVFQK	0	-0.08045	0.88372	0.945119	-0.0680333	0.842857	0.956096	-0.747915	0.00142198	0.0122696	-0.367825	0.0885519	0.274845	NA	NA	-0.0046	-0.0043	-0.1236	-0.0419	0.2551	NA	0.076	NA	NA	-0.5609	-0.1333	0.9006	0.1852
A0A2R8Q718_K311k_1_1_311_311	A0A2R8Q718	F1QY43|A0A2R8Q718|F1QK93	A0A2R8Q718_K311k_1_1_311_311	K311k	AGSSPAGkTADAKDEPK	0	-0.00235833	0.994977	0.996414	-0.141392	0.70656	0.903923	0.947582	8.87278e-05	0.00235801	0.567903	0.00831376	0.0640553	-0.4212	-0.0599	-0.3427	-0.8735	0.1572	0.4595	-0.0304	0.6139	-0.5657	-1.3141	NA	0.5512	0.5617	0.1837	0.0507
A0A2R8Q718_K721k_1_1_721_721	A0A2R8Q718	F1QY43|A0A2R8Q718|F1QK93	A0A2R8Q718_K721k_1_1_721_721	K721k	VINDkHDDVMAK	0	-0.1731	0.48477	0.681261	-0.16555	0.535445	0.815916	0.947582	8.87278e-05	0.00235801	0.567903	0.00831376	0.0640553	-0.072	0.1969	-0.113	-0.0446	0.2754	-0.1862	0.0416	0.2096	0.4124	0.3624	-0.3247	0.7766	0.2901	-0.088	-0.1421
A0A2R8Q784_K277k_1_1_277_277	A0A2R8Q784	E7FE19|A0A2R8Q784	A0A2R8Q784_K277k_1_1_277_277	K277k	FCDYGkAEGAK	0	-0.8838	0.0231037	0.124351	-0.2615	0.499104	0.794717	-0.198044	0.518307	0.641636	-0.362185	0.28136	0.535928	-0.2564	-1.1659	0.368	-0.5881	-0.5377	0.1521	-0.1274	0.6674	-0.3228	0.4621	1.0861	0.1692	0.3807	0.289	-0.4769
A0A2R8Q7G9_K362k_1_1_362_362	A0A2R8Q7G9	A0A2R8Q8V2|A0A2R8Q7G9|A0A0R4INI3	A0A2R8Q7G9_K362k_1_1_362_362	K362k	LTGAIMHFGNMkFK	0	0.970425	0.168188	0.369845	0.8422	0.0870279	0.374175	0.180075	0.749475	0.826208	-0.00978806	0.987152	0.99386	-1.0011	-0.4312	0.7333	0.3259	-0.0431	1.2543	0.0281	NA	-1.0637	NA	NA	-0.0242	-0.4611	-0.1544	-1.0767
A0A2R8Q7M1_K510k_1_1_510_510	A0A2R8Q7M1	A0A2R8Q7M1|A0A0G2L2K5	scarb2b	K510k	VDDQDEkNGTYIGMTPVDKS	0	0.9527	0.00173797	0.0280857	0.368175	0.194256	0.533861	0.208745	0.141456	0.257569	-0.0669513	0.649502	0.832721	0.3454	0.2318	0.8444	0.5307	0.5906	0.2109	0.4945	-1.0034	-0.126	-0.7381	0.009	0.1934	-0.2888	0.279	0.0717
A0A2R8Q7N4_K86k_1_1_86_86	A0A2R8Q7N4	Q6DRE6|A0A2R8Q7N4	A0A2R8Q7N4_K86k_1_1_86_86	K86k	ALkEPPRDR	0	-0.120925	0.766744	0.878945	-0.472417	0.25697	0.608628	0.439693	0.0451288	0.116344	0.567079	0.0202017	0.112863	0.51	0.1917	0.129	0.174	-0.133	-0.7274	-1.1633	-0.3152	0.7691	0.6624	NA	-0.4512	0.2291	0.5842	-1.1707
A0A2R8Q7Y2_K273k_1_1_273_273	A0A2R8Q7Y2	A0A2R8Q7Y2|F1Q4M2	rdh12l	K273k M276m	AAkAAmDDEVAQR	0	0.660083	0.579258	0.749116	-0.103242	0.930512	0.987771	-0.0625039	0.735801	0.81624	-0.178147	0.379639	0.624946	-1.1199	-5.9434	-2.0918	-4.0895	0.7382	0.7246	0.4522	-5.8049	-0.5157	-5.5931	NA	0.5279	1.0116	0.6448	0.782
A0A2R8Q7Y8_K207k_1_1_207_207	A0A2R8Q7Y8	A0A2R8Q7Y8|Q7T3C1	tcea1	K207k	ISNLkDAK	0	-0.4359	0.386378	0.595603	-0.106967	0.752346	0.925753	0.180694	0.0621078	0.146263	0.279492	0.0119469	0.0813695	-0.6249	-0.0252	-0.2681	-0.8118	-0.2879	0.4311	-0.8928	NA	0.0034	NA	NA	-0.366	0.3286	-0.2211	-0.3131
A0A2R8Q8F2_K109k_1_1_109_109	A0A2R8Q8F2	A0A2R8Q8F2|Q6DHL8|F6NPQ0	A0A2R8Q8F2_K109k_1_1_109_109	K109k	DINELkLK	0	-0.66305	0.0202234	0.114428	0.117742	0.675651	0.894669	1.39357	9.71242e-05	0.00249423	1.15232	0.000963675	0.0166958	-0.2823	0.1805	0	0.0996	0.0632	0.4174	0.4211	0.068	0.3543	1.347	0.8807	0.1311	0.025	0.158	0.4172
A0A2R8Q8P2_K452k_1_1_452_452	A0A2R8Q8P2	A0A2R8Q8P2|F6NIA2	kdm1a	K452k	DLLNkMVTTK	0	0.3243	0.36281	0.577809	-0.491408	0.175901	0.513944	-0.399734	0.157853	0.276625	1.00208	0.00414127	0.0417485	0.2937	0.6248	0.1949	-0.1554	0.9042	0.3456	-0.3046	-0.7709	0.6773	-0.1608	NA	1.0017	0.71	0.8063	0.7079
A0A2R8Q8S1_K128k_1_1_128_128	A0A2R8Q8S1	A0A2R8Q8S1|Q6AZA4	kras	K128k	CDLQSHNVDSkQAQDLAR	0	0.539375	0.132608	0.321641	-0.516375	0.105126	0.404302	0.553563	0.00762976	0.0354127	0.147429	0.449846	0.687558	-0.1732	0.3113	-0.0269	-0.0005	-0.0222	-0.2104	-0.4664	-1.0808	0.0574	NA	NA	0.5721	-0.1801	0.1796	0.5619
A0A2R8Q944_K112k_1_1_112_112	A0A2R8Q944	A0A2R8QTM1|A0A2R8Q8U5|Q5TYZ5|A0A2R8Q944|A8E7M5	cand2	K112k	LLEDkNGEVQNLAVK	0	0.09265	0.689514	0.827227	-0.429308	0.100915	0.398756	0.33291	0.0106151	0.0435821	-0.0869167	0.483028	0.71346	0.3375	0.714	0.3118	0.2964	-0.0491	0.0907	-0.3567	-0.1955	0.3297	0.4344	0.7205	0.6775	0.3012	0.1933	0.1251
A0A2R8Q944_K1184k_1_1_1184_1184	A0A2R8Q944	A0A2R8QTM1|A0A2R8Q8U5|A0A2R8Q944|A8E7M5	cand2	K1184k	AGSVkQEFEK	0	0.17105	0.522525	0.709371	0.658208	0.0339365	0.23057	0.33291	0.0106151	0.0435821	-0.0869167	0.483028	0.71346	0.3536	0.3387	-0.3522	0.0737	0.1963	0.4931	0.6784	0.5611	-0.3987	-0.4239	-0.0089	0.1077	-0.0476	-0.2994	-0.5698
A0A2R8Q9G7_K831k_1_1_831_831	A0A2R8Q9G7	A0A2R8Q9G7|R4GDM7	A0A2R8Q9G7_K831k_1_1_831_831	K831k	CQPkTVLDK	0	-0.249875	0.403263	0.608897	-0.132475	0.6789	0.896344	0.109692	0.277718	0.411036	-0.0835645	0.438542	0.678242	0.1602	-0.1189	-0.2043	0.4356	0.0219	0.2967	-0.5829	0.4802	-0.1042	0.4797	0.4164	0.4257	0.4589	-0.7409	0.0338
A0A2R8Q9G7_K923k_1_1_923_923	A0A2R8Q9G7	A0A286Y9H2|E7F5R7|A0A2R8Q9G7|R4GDM7	A0A2R8Q9G7_K923k_1_1_923_923	K923k M924m	VLQALGNEkmK	0	-0.4455	0.132376	0.321474	-0.192667	0.533693	0.814638	0.109692	0.277718	0.411036	-0.0835645	0.438542	0.678242	-0.231	-0.0391	-0.0128	0.258	0.2549	-0.2376	-0.1678	1.0492	0.8272	-0.0457	-0.0736	0.5213	0.2525	-0.316	0.1122
A0A2R8Q9J9_K229k_1_1_229_229	A0A2R8Q9J9	Q6TLF6|A0A2R8Q9J9	rgn	K229k	IDPQTGkR	0	-0.58525	0.0865847	0.257969	0.138275	0.694048	0.90001	-0.460934	0.00118077	0.0108714	-0.232115	0.0755161	0.254165	0.0208	-0.2526	0.0969	-0.3679	0.0242	0.0185	0.4439	1.2993	0.5932	0.614	-0.6683	0.0709	-0.2085	0.1535	0.0798
A0A2R8Q9M0_K1654k_1_1_1654_1654	A0A2R8Q9M0	A0A2R8QK05|A0A0G2L365|A0A2R8Q9M0	A0A2R8Q9M0_K1654k_1_1_1654_1654	K1654k	SLQGHLkDAQMQLDDALR	0	0.296225	0.39164	0.600281	0.306183	0.411866	0.734696	0.47291	0.118407	0.227007	0.863993	0.0143376	0.0914633	0.0866	0.1121	0.0671	-0.0955	0.5643	0.2507	0.542	-0.2144	-0.1849	0.7136	-1.3289	-0.2536	0.202	-0.0565	0.6927
A0A2R8Q9M0_K1817k_1_1_1817_1817	A0A2R8Q9M0	A0A2R8Q8V2|A0A2R8QK05|A0A0G2L365|A0A2R8Q9M0|A0A2R8Q7G9|F1QZW1|A0A0R4INI3|F1QSE1	A0A2R8Q9M0_K1817k_1_1_1817_1817	K1817k	QVQkLEAR	0	0.6528	0.0410701	0.172444	0.355225	0.278057	0.628218	0.180075	0.749475	0.826208	-0.00978806	0.987152	0.99386	0.5873	0.4583	0.8536	1.1312	0.0604	-0.0667	1.0122	0.3589	0.2982	0.3109	-0.5488	-0.3968	-0.1977	0.2659	0.2489
A0A2R8Q9M0_K1841k_1_1_1841_1841	A0A2R8Q9M0	A0A2R8QK05|A0A0G2L365|A0A2R8Q9M0	A0A2R8Q9M0_K1841k_1_1_1841_1841	K1841k	ASESVkGIR	0	0.168708	0.520396	0.707453	0.4818	0.0805827	0.360216	0.47291	0.118407	0.227007	0.863993	0.0143376	0.0914633	-0.2241	0.2508	0.2355	0.5689	0.5168	-0.1086	0.4312	0.3963	-0.1632	-0.1159	NA	-0.2067	0.0759	-0.4094	-0.2678
A0A2R8Q9M0_K66k_1_1_66_66	A0A2R8Q9M0	A0A2R8QK05|A0A0G2L365|A0A2R8Q9M0	A0A2R8Q9M0_K66k_1_1_66_66	K66k	VTCETEkGK	0	0.483575	0.181148	0.384242	0.2665	0.4229	0.743137	0.47291	0.118407	0.227007	0.863993	0.0143376	0.0914633	0.3666	0.7608	0.2625	0.2114	0.1914	-0.1394	-0.1816	NA	-0.2504	0.0839	NA	NA	-0.8568	0.4009	-0.4732
A0A2R8Q9M0_K999kK1000k_2_0_997_1000	A0A2R8Q9M0	A0A0G2L365|A0A2R8Q9M0|A0A2R8QK05	A0A2R8Q9M0_K999kK1000k_2_0_997_1000	M985m K999k K1000k	NLTEEmAALDEIIARLTKEkk	2	0.482075	0.674855	0.816829	-2.11587	0.0250378	0.199921	0.47291	0.118407	0.227007	0.863993	0.0143376	0.0914633	-0.1441	-2.2997	-0.0896	-1.5607	-3.1492	-0.0724	-0.6476	-1.5056	NA	NA	NA	NA	-0.1386	1.1138	1.5032
A0A2R8QAL3_K248k_1_1_248_248	A0A2R8QAL3	F1QA09|A0A2R8QAL3|X1WCY4	fat3a	K248k	YDLEIQAVDRGMKLYGNNGVSSTAk	0	-1.47117	0.179665	0.382743	0.497558	0.665757	0.891932	1.59629	0.0217804	0.0710919	0.474982	0.484928	0.715099	-1.1278	0.4132	-1.3909	-1.2471	2.3776	-1.8404	-1.1545	1.393	2.1866	0.2607	-1.3082	2.4027	-2.0273	-1.6454	-1.5433
A0A2R8QAN7_K368k_1_1_368_368	A0A2R8QAN7	A0A2R8QAN7|E7FG88|A0A2R8PVI0	asxl2	K368k	KVDLWkEQFFESYYGEHSGLCIEESK	0	0.80145	0.00723277	0.0638679	0.231992	0.418607	0.739487	-0.998939	3.87663e-06	0.000423889	0.276705	0.0712124	0.24526	0.6417	0.7048	0.9677	1.6448	0.1895	0.0926	0.5539	0.1357	0.2261	-0.0348	0.4262	-0.0959	-0.409	0.2235	0.4681
A0A2R8QB02_K5k_1_1_5_5	A0A2R8QB02	A0A2R8QB02|F1R6L2|X1WBM9|A0A2R8QJ16	A0A2R8QB02_K5k_1_1_5_5	K5k	VkSSMQQVPNPIPK	0	-0.39065	0.36753	0.579955	-0.333183	0.474474	0.779692	-0.519449	0.000840928	0.00877165	0.174163	0.202002	0.442037	-0.6427	-0.1135	-0.5896	-0.3502	0.6706	-0.0003	-0.3815	0.5423	0.3324	-0.359	-0.6491	1.8863	-0.0585	0.1628	-0.2728
A0A2R8QBA1_K1075k_1_1_1075_1075	A0A2R8QBA1	A0A0R4IFH8|A0A2R8PZF8|E9QEQ4|F1RA12|A0A2R8QBA1|A0A2R8QPP7|F1QMW3|F8W4E9|Q7SZN5|Q9DEG6|Q9DEG7|Q1RLQ4|Q6NZ25	A0A2R8QBA1_K1075k_1_1_1075_1075	K1075k	GGLVDEkALAQALK	0	-0.0909	0.711835	0.842111	-0.410775	0.136014	0.460185	0.263848	0.241912	0.372018	0.555353	0.0328925	0.151625	0.3416	-0.0863	0.0688	-0.4916	0.1207	0.4049	0.291	-0.2145	0.0413	0.3054	0.0639	0.0703	0.8587	0.8645	0.9384
A0A2R8QBA1_K1082k_1_1_1082_1082	A0A2R8QBA1	F8W3U1|A0A0R4IFH8|A0A2R8PZF8|E9QEQ4|F1RA12|A0A2R8QBA1|A0A2R8QPP7|F1QMW3|Q1RLQ4|Q6NZ25	A0A2R8QBA1_K1082k_1_1_1082_1082	K1082k	ALAQALkEGR	0	-0.784575	0.0106827	0.0789918	-0.0930667	0.753511	0.925753	0.263848	0.241912	0.372018	0.555353	0.0328925	0.151625	0.1941	-0.3651	0.2146	-0.8008	0.0664	0.7051	0.2231	0.4419	0.2491	0.8463	0.8438	0.4772	0.8052	0.0875	0.3285
A0A2R8QBL5_K339k_1_1_339_339	A0A2R8QBL5	A0A2R8QBL5|E9QFR8	actn2b	K339k	VQEkCQLEISFNTLQTK	0	-0.4501	0.183794	0.386695	0.788558	0.0390737	0.245213	0.758248	0.000901326	0.00917661	0.719427	0.00238449	0.0306695	-0.6526	-0.4064	-0.4391	-0.3801	1.1213	0.5953	0.9709	-0.3302	-0.2572	1.2224	-0.7128	0.1216	0.3061	-0.0368	0.0382
A0A2R8QC99_K50k_1_1_50_50	A0A2R8QC99	A0A2R8QC99|E7EY90	A0A2R8QC99_K50k_1_1_50_50	K50k	MGkVAPSVFSGVR	0	0.698175	0.0870399	0.257969	1.28727	0.00692523	0.0945104	2.30705	1.20732e-06	0.000230803	0.690208	0.0344655	0.155107	0.1034	-0.035	0.5827	0.1174	0.5177	1.2215	0.8672	0.3311	0.2754	-1.4815	-1.1492	-0.7815	0.1376	-0.7064	-0.3236
A0A2R8QCE4_K521k_1_1_521_521	A0A2R8QCE4	A0A2R8QCE4|A0A2R8QMJ2|A0A0G2KUL6	A0A2R8QCE4_K521k_1_1_521_521	K521k	LVYNSTTkPI	0	-0.2042	0.269685	0.482249	-0.259475	0.197527	0.536291	-0.158463	0.412777	0.544928	0.562205	0.0157817	0.0978141	-0.1515	0.1657	0.0852	-0.2864	0.1077	0.1802	0.04	0.2525	0.2883	0.1231	-0.0341	0.5259	0.3458	0.3478	0.2556
A0A2R8QCG5_K42k_1_1_42_42	A0A2R8QCG5	A0A2R8QCG5|A0A0R4ITY2	si:ch1073-185p12.2	K42k	LVLLGkTGAGK	0	-0.29795	0.495807	0.6904	-0.0713583	0.879058	0.967957	-0.228482	0.59646	0.709044	0.12958	0.780121	0.903732	-1.0063	-0.0273	-0.835	-0.0092	0.1289	1.7893	-0.5392	-0.1273	-0.4044	0.5479	-0.7022	0.2506	0.7107	0.3506	0.8122
A0A2R8QCL7_K1045k_1_1_1045_1045	A0A2R8QCL7	A0A2R8QCL7|E7F0X6|Q6DRM9	A0A2R8QCL7_K1045k_1_1_1045_1045	K1045k	ISAPNMkAMEK	0	-0.37445	0.352226	0.567118	0.123033	0.77152	0.932669	0.129244	0.356966	0.49204	0.0987709	0.510993	0.735028	0.0161	-0.2579	-1.002	-0.9636	-0.0652	0.6269	0.0028	-0.3717	-0.4857	0.3252	NA	0.4966	0.5306	NA	-0.8318
A0A2R8QCL7_K90k_1_1_90_90	A0A2R8QCL7	A0A2R8QCL7|E7F0X6|Q6DRM9|Q6NYA8	A0A2R8QCL7_K90k_1_1_90_90	K90k	DLIHGAPVGkPAANR	0	0.12295	0.738721	0.861804	0.457175	0.226394	0.575913	0.129244	0.356966	0.49204	0.0987709	0.510993	0.735028	0.735	0.5231	-0.9787	-0.0652	0.553	0.4024	0.3667	-0.2465	0.093	-0.0547	NA	0.4981	0.1188	-0.1153	-0.5675
A0A2R8QEN7_K104k_1_1_104_104	A0A2R8QEN7	A0A2R8QEN7|Q0P3Z4	A0A2R8QEN7_K104k_1_1_104_104	K104k	NNkDIHELK	0	-0.0811417	0.830682	0.916391	-0.177625	0.640778	0.878725	-0.117416	0.673407	0.769088	0.0644129	0.830052	0.925182	-0.1024	-0.6979	0.161	-0.3386	0.5667	-0.6181	0.4825	-0.5192	0.1689	-0.1397	NA	-0.4409	0.5956	0.1475	0.9831
A0A2R8QEN7_K110k_1_1_110_110	A0A2R8QEN7	A0A2R8QEN7|Q0P3Z4	A0A2R8QEN7_K110k_1_1_110_110	K110k	DIHELkLK	0	0.0709	0.737588	0.860737	0.0353167	0.877021	0.967354	-0.117416	0.673407	0.769088	0.0644129	0.830052	0.925182	0.2775	-0.3529	-0.2477	-0.2191	0.5872	0.6153	0.3481	-0.4287	-0.017	-0.215	-0.1651	0.1481	0.7983	0.5528	0.427
A0A2R8QEN7_K119k_1_1_119_119	A0A2R8QEN7	A0A2R8Q8F2|Q6DHL8|A0A2R8QEN7|Q0P3Z4|F6NPQ0	A0A2R8QEN7_K119k_1_1_119_119	K119k	VQDLGGkFK	0	0.856667	0.00357522	0.0431206	0.22315	0.378548	0.714486	-0.117416	0.673407	0.769088	0.0644129	0.830052	0.925182	0.4262	0.2188	0.5188	0.6778	0.36	0.0388	0.3416	-0.6298	0.0774	-0.6364	NA	-0.326	0.3373	-0.0157	0.099
A0A2R8QEN7_K155k_1_1_155_155	A0A2R8QEN7	A0A2R8QEN7|Q0P3Z4|F6NPQ0|E7F5J9	A0A2R8QEN7_K155k_1_1_155_155	K155k	ANLkSVKK	0	1.13857	0.00148483	0.0257696	0.955325	0.00875985	0.108176	-0.117416	0.673407	0.769088	0.0644129	0.830052	0.925182	0.9945	1.6078	1.1618	1.5948	-0.3913	0.7471	0.0255	0.0685	0.3506	0.0471	0.3384	-1.4581	-1.0427	-0.2356	-0.5765
A0A2R8QEN7_K98k_1_1_98_98	A0A2R8QEN7	A0A2R8QEN7|Q0P3Z4	A0A2R8QEN7_K98k_1_1_98_98	K98k	IDSVDEERYDFEAkVVK	0	0.55125	0.102018	0.281242	-0.39315	0.268196	0.619436	-0.117416	0.673407	0.769088	0.0644129	0.830052	0.925182	-0.2667	-0.7918	-0.5708	-0.1828	0.565	0.2443	0.2758	-0.757	-0.4223	-0.7118	-2.126	0.5728	1.185	0.5366	0.725
A0A2R8QEN9_K117k_1_1_117_117	A0A2R8QEN9	A0A2R8QEN9|A0A0R4IMF8|Q6NYR4	A0A2R8QEN9_K117k_1_1_117_117	K117k	VQVEYkGESK	0	-0.6761	0.0238326	0.127064	-0.04665	0.874614	0.967354	-0.331685	0.00595826	0.029895	-0.231284	0.0537005	0.206749	0.1674	-0.464	0.1037	-0.4861	0.3514	-0.6288	-0.1003	0.9921	0.3593	0.11	0.564	0.124	-0.2834	-0.3156	0.158
A0A2R8QEN9_K168k_1_1_168_168	A0A2R8QEN9	A0A2R8Q860|Q1LY29|A0A2R8QEN9|A0A0R4IMF8|F1R9V3|R4GEU2|Q6NYR4	A0A2R8QEN9_K168k_1_1_168_168	K168k	QATkDAGTISGLNVLR	0	-0.24425	0.296935	0.506326	0.0866083	0.727739	0.913109	-0.331685	0.00595826	0.029895	-0.231284	0.0537005	0.206749	-0.0171	0.4716	-0.2229	-0.1671	0.5743	0.6594	-0.1269	0.1826	0.2967	0.4307	0.1315	0.3616	0.4704	0.0367	0.2606
A0A2R8QEN9_K255k_1_1_255_255	A0A2R8QEN9	A0A2R8Q860|A0A2R8QEN9|A0A0R4IMF8|Q6NYR4	A0A2R8QEN9_K255k_1_1_255_255	K255k	MVNHFITEFkR	0	-0.455925	0.0993234	0.277274	0.47295	0.11223	0.418936	-0.331685	0.00595826	0.029895	-0.231284	0.0537005	0.206749	-0.007	0.7915	-0.1499	0.2916	0.2352	0.6764	0.2836	0.7395	0.1484	0.9536	0.9084	0.287	-0.0416	-0.4437	-0.0999
A0A2R8QEN9_K334k_1_1_334_334	A0A2R8QEN9	Q90473|A0A2R8Q860|A0A2R8QEN9|A0A0R4IMF8|B0UXR9|A5PMG2|Q6NYR4|Q6PH56|B0S610|Q6PGX4	A0A2R8QEN9_K334k_1_1_334_334	K334k	ALRDAkMDK	0	-0.836325	0.100603	0.2787	0.763483	0.159921	0.493981	-0.331685	0.00595826	0.029895	-0.231284	0.0537005	0.206749	0.2075	-0.6175	0.2717	-0.2249	0.4568	-1.1847	1.1753	1.4959	0.5558	0.3965	0.5339	-1.3041	-1.3248	0.1681	0.0034
A0A2R8QEN9_K357k_1_1_357_357	A0A2R8QEN9	A0A2R8Q860|A0A2R8QEN9|A0A0R4IMF8|Q6NYR4	A0A2R8QEN9_K357k_1_1_357_357	K357k	IQkLLQDYFNGK	0	-0.4216	0.14645	0.341378	0.212333	0.486183	0.788731	-0.331685	0.00595826	0.029895	-0.231284	0.0537005	0.206749	-0.3327	-0.2748	-0.1767	0.2499	0.3155	1.029	-0.1729	0.0685	-0.1486	0.7605	0.4717	0.4157	0.1336	-0.0923	0.2558
A0A2R8QEN9_K3k_1_1_3_3	A0A2R8QEN9	Q90473|Q1LY29|A0A2R8QEN9|A0A0R4IMF8|F1R9V3|Q6NYR4	A0A2R8QEN9_K3k_1_1_3_3	K3k	SkGPAVGIDLGTTYSCVGVFQHGK	0	1.0687	0.0675316	0.227728	0.218958	0.713896	0.905998	-0.497962	0.10151	0.204246	0.256526	0.415534	0.659715	0.0293	-0.1534	0.327	0.4481	-0.0098	0.9439	0.8081	-2.0951	-1.562	-0.096	0.1293	-1.3278	0.9967	0.785	0.9932
A0A2R8QEN9_K460k_1_1_460_460	A0A2R8QEN9	A0A2R8QEN9|A0A0R4IMF8|B0UXR9|F1R9V3	A0A2R8QEN9_K460k_1_1_460_460	K460k	AMTkDNNLLGK	0	-0.73165	0.215361	0.424077	-0.243133	0.578899	0.845261	-0.497962	0.10151	0.204246	0.256526	0.415534	0.659715	NA	NA	-2.0571	-2.2527	-0.3146	0.3727	-0.3402	-0.864	-1.9825	NA	NA	0.4853	0.9989	-0.7685	-0.1193
A0A2R8QEN9_K509k_1_1_509_509	A0A2R8QEN9	A0A2R8Q860|A0A2R8QEN9|A0A0R4IMF8|F1R9V3	A0A2R8QEN9_K509k_1_1_509_509	K509k	ENkITITNDK	0	-0.303	0.397695	0.605108	-0.482725	0.218552	0.565015	-0.331685	0.00595826	0.029895	-0.231284	0.0537005	0.206749	-0.4709	-0.5348	-0.4345	-0.66	0.0892	0.1075	-0.2375	0.7339	0.3822	-0.9985	-1.0058	0.6478	0.3414	0.0628	0.8245
A0A2R8QEN9_K516k_1_1_516_516	A0A2R8QEN9	Q90473|A0A2R8Q860|A0A2R8QEN9|A0A0R4IMF8|B0UXR9|F1R9V3|A5PMG2|Q1LY27|B0UXS6|Q6NYR4|Q6PH56|B0S610|Q6PGX4	A0A2R8QEN9_K516k_1_1_516_516	K516k	ITITNDkGR	0	-1.1229	0.0134432	0.0901377	0.307608	0.314711	0.660213	-0.331685	0.00595826	0.029895	-0.231284	0.0537005	0.206749	NA	NA	-0.7164	-0.9152	0.3555	0.3869	-0.3505	0.6695	-0.0553	NA	NA	-0.4425	0.2567	-0.2191	-0.303
A0A2R8QEN9_K533k_1_1_533_533	A0A2R8QEN9	Q90473|A0A2R8Q860|A0A2R8QEN9|A0A0R4IMF8|F1R9V3|Q1LY27|Q6NYR4	A0A2R8QEN9_K533k_1_1_533_533	K533k	MVQEAEkYKAEDDVQR	0	-0.0111	0.974345	0.988843	-0.321483	0.394388	0.725757	-0.331685	0.00595826	0.029895	-0.231284	0.0537005	0.206749	-0.2794	-0.2082	-0.1952	-0.4674	0.2434	-0.0348	-0.0143	0.6341	-0.0018	-0.2644	-1.4737	0.3549	0.5172	-0.0544	0.7273
A0A2R8QEN9_K535k_1_1_535_535	A0A2R8QEN9	A0A2R8Q860|A0A2R8QEN9|A0A0R4IMF8|F1R9V3	A0A2R8QEN9_K535k_1_1_535_535	K535k	YkAEDDVQR	0	-0.254583	0.474003	0.673306	-0.263733	0.458565	0.768614	-0.331685	0.00595826	0.029895	-0.231284	0.0537005	0.206749	-0.0165	-0.9319	0.2583	0.0735	0.1446	0.3762	-0.6697	0.4535	0.4093	-0.5615	NA	0.425	0.1747	0.1923	0.0644
A0A2R8QEN9_K548k_1_1_548_548	A0A2R8QEN9	Q90473|A0A2R8Q860|A0A2R8QEN9|A0A0R4IMF8|Q1LY27|Q6NYR4	A0A2R8QEN9_K548k_1_1_548_548	K548k	VSAkNGLESYAFNMK	0	0.782	0.0147227	0.0950524	0.0720583	0.81744	0.948176	-0.331685	0.00595826	0.029895	-0.231284	0.0537005	0.206749	-0.0496	0.2018	-0.2081	0.3562	0.2421	1.0942	0.2229	-0.3339	-0.7474	-0.3133	-1.4331	0.1624	0.7978	0.3752	0.4553
A0A2R8QEN9_K566k_1_1_566_566	A0A2R8QEN9	Q90473|A0A2R8Q860|A0A2R8QEN9|A0A0R4IMF8	A0A2R8QEN9_K566k_1_1_566_566	K566k	STVEDEkLK	0	-0.962258	0.0169928	0.103895	-0.559908	0.137589	0.462125	-0.331685	0.00595826	0.029895	-0.231284	0.0537005	0.206749	-1.6299	-0.3186	-0.6044	-1.3588	0.1994	-0.0596	-0.7345	-0.2974	0.4605	-0.2101	NA	0.6067	0.7145	-0.0429	0.1684
A0A2R8QEN9_K592k_1_1_592_592	A0A2R8QEN9	Q90473|A0A2R8Q860|A0A2R8QEN9|A0A0R4IMF8|Q6NYR4	A0A2R8QEN9_K592k_1_1_592_592	K592k	CNEVIGWLDkNQTAEREEFEHQQK	0	-0.458525	0.070545	0.231862	-0.258975	0.324952	0.669621	-0.331685	0.00595826	0.029895	-0.231284	0.0537005	0.206749	-0.3975	-0.1924	-0.426	-0.3225	0.2681	0.2631	-0.2435	0.6152	0.2045	0.055	-0.379	0.326	0.745	0.0497	0.2988
A0A2R8QEN9_K606k_1_1_606_606	A0A2R8QEN9	Q90473|A0A2R8Q860|A0A2R8QEN9|A0A0R4IMF8	A0A2R8QEN9_K606k_1_1_606_606	K606k	NQTAEREEFEHQQkELEK	0	-1.11668	0.0270476	0.135877	-0.12995	0.795508	0.942292	-0.331685	0.00595826	0.029895	-0.231284	0.0537005	0.206749	-1.324	-0.529	-1.834	-1.4055	0.0006	0.0088	-0.9934	0.6859	-0.3126	-0.5442	-0.4549	1.0139	0.1311	-1.3356	-0.6016
A0A2R8QEN9_K610k_1_1_610_610	A0A2R8QEN9	Q90473|A0A2R8Q860|A0A2R8QEN9|A0A0R4IMF8|Q6NYR4|Q6PGX4	A0A2R8QEN9_K610k_1_1_610_610	K610k	ELEkVCNPIITK	0	-0.5217	0.210078	0.416993	-0.816258	0.0772323	0.355387	-0.331685	0.00595826	0.029895	-0.231284	0.0537005	0.206749	-0.5574	-0.7471	-0.7721	-1.1821	0.2092	-0.7703	0.0159	0.1464	0.4232	-0.4322	-1.3093	0.8482	0.3138	-0.1538	1.5299
A0A2R8QF90_K97k_1_1_97_97	A0A2R8QF90	A0A2R8QF90	A0A2R8QF90_K97k_1_1_97_97	K97k	RIFIIDTPGLFDTMLEkQEIK	0	-0.1179	0.791063	0.892088	-1.06987	0.0279419	0.21216	-0.228482	0.59646	0.709044	0.12958	0.780121	0.903732	-0.2048	-0.7274	-0.6466	-0.1236	-0.4761	-0.0015	0.1585	-0.9344	-0.5308	0.5421	NA	-0.1596	1.7509	1.5108	0.7519
A0A2R8QFM8_K521k_1_1_521_521	A0A2R8QFM8	A8DZ95|A0A2R8QFM8	dpysl2b	K521k	TSPAkQPGQPVR	0	-0.354967	0.307932	0.520589	0.0823167	0.809751	0.947374	0.459026	0.00327285	0.0203295	0.204006	0.162155	0.389922	0.5795	0.3042	0.0108	0.0623	0.4082	-0.2388	-0.6225	0.5635	1.2353	-0.0163	NA	0.1914	-0.5367	-0.6047	0.0166
A0A2R8QGJ9_K150k_1_1_150_150	A0A2R8QGJ9	A0A2R8QGJ9	ube2kb	K150k	QNPEMFkQTAR	0	-0.12525	0.641658	0.793292	0.242592	0.407759	0.734246	-0.346889	0.00066457	0.00764918	-0.284639	0.00493623	0.0461661	0.7152	0.2016	0.9077	0.2598	-0.5664	-0.0589	0.3309	0.4602	0.9543	0.3987	0.7721	0.0625	-0.4882	-0.7829	-0.1543
A0A2R8QGJ9_K184k_1_1_184_184	A0A2R8QGJ9	A0A2R8QGJ9|Q5PR60	ube2kb	K184k	LCAMGFDkNAVIVALSSK	0	2.53575	0.00546377	0.0546785	-0.0547667	0.947501	0.989668	-0.346889	0.00066457	0.00764918	-0.284639	0.00493623	0.0461661	1.3478	-0.1657	0.6246	1.6271	-2.3256	0.4018	0.8113	-2.4231	NA	-2.5031	-0.1057	NA	-1.0723	0.1952	-0.0711
A0A2R8QH08_K111k_1_1_111_111	A0A2R8QH08	Q8JH71|E9QF34|A0A2R8QH08|E9QBQ4	A0A2R8QH08_K111k_1_1_111_111	K111k	VDkGTAGLAGTDGETTTQGLDGLSER	0	-0.746	0.0627977	0.219459	-0.34645	0.363936	0.701827	-1.13636	0.015473	0.0563642	0.0938197	0.834418	0.927252	-0.3618	-0.3695	0.4748	-0.4123	-0.1395	-0.9796	-0.6146	1.1901	0.8049	-0.2586	NA	0.3218	-0.1576	-0.681	-0.409
A0A2R8QH08_K46k_1_1_46_46	A0A2R8QH08	E9QF34|A0A2R8QH08|E9QBQ4|A0A0R4IU94	A0A2R8QH08_K46k_1_1_46_46	K46k	RFQkINVENTEENRR	0	-0.3951	0.0625388	0.218941	-0.16575	0.446828	0.761626	-1.13636	0.015473	0.0563642	0.0938197	0.834418	0.927252	0.4371	0.647	0.1805	0.6744	0.2852	0.3497	0.0734	1.0634	0.8552	0.7667	0.8341	0.455	0.7432	0.2514	0.1578
A0A2R8QH08_K90k_1_1_90_90	A0A2R8QH08	E9QF34|A0A2R8QH08|E9QBQ4|A0A0R4IU94	A0A2R8QH08_K90k_1_1_90_90	K90k	SDkGVLFPK	0	-1.03778	0.0382306	0.164035	-0.2965	0.524141	0.81039	-1.13636	0.015473	0.0563642	0.0938197	0.834418	0.927252	0.0029	-0.6109	-0.221	-0.7876	-0.2015	-1.1667	-0.4441	0.8816	1.6818	-0.6625	NA	0.1591	-0.0873	-0.542	-0.7602
A0A2R8QHQ4_K161k_1_1_161_161	A0A2R8QHQ4	A0A2R8QHQ4|X1WHE2|Q6DRD0	ebna1bp2	K161k	LLLkQEVMEK	0	-0.54935	0.294126	0.503271	-0.6599	0.302773	0.649126	1.22966	0.00328593	0.0203708	0.925787	0.0262574	0.131828	-0.0334	NA	NA	0.721	-0.6926	NA	NA	0.9083	NA	0.878	NA	NA	0.5442	NA	-0.6096
A0A2R8QHZ3_K1088k_1_0_1087_1088	A0A2R8QHZ3	A0A2R8QHZ3|A0A0G2L354|A0A2R8Q9D2	LOC100329748	K1088k	KkDFEISQLSSR	1	NA	NA	NA	0.530967	0.388268	0.720484	0.0445521	0.824543	0.880791	-0.640635	0.0101402	0.0739003	NA	NA	0.4756	0.0687	NA	NA	-0.1181	NA	NA	NA	NA	-0.7493	-1.2919	NA	0.094
A0A2R8QHZ3_K1282k_1_1_1282_1282	A0A2R8QHZ3	A0A2R8QHZ3|A0A0G2L354|A0A2R8Q9D2	LOC100329748	K1282k	SINDFTMQkAK	0	0.2305	0.467259	0.668637	0.438733	0.208404	0.553281	0.0445521	0.824543	0.880791	-0.640635	0.0101402	0.0739003	0.0646	0.2768	0.7826	0.7966	0.2488	-0.0471	0.4815	-0.0868	-0.1554	0.2873	0.9535	-0.9841	-0.0137	-0.0721	0.2259
A0A2R8QHZ3_K1310k_1_1_1310_1310	A0A2R8QHZ3	A0A2R8QHZ3|A0A0G2L354|A0A2R8Q9D2	LOC100329748	K1310k	GkQSYTQQIEDLRR	0	2.58793	0.000332873	0.0108367	0.792933	0.190878	0.531091	0.0445521	0.824543	0.880791	-0.640635	0.0101402	0.0739003	0.0576	0.8285	1.2287	1.7976	0.0305	-1.189	1.1554	NA	-2.3897	-1.3695	-1.0703	NA	-1.3468	-0.53	-0.5051
A0A2R8QHZ3_K1477k_1_1_1477_1477	A0A2R8QHZ3	A0A2R8Q4Q8|A0A2R8QHZ3|A0A2R8QK05	LOC100329748	K1477k	QKYEESQSELESSQkEAR	0	-0.559	0.194282	0.398227	-0.149767	0.684399	0.898302	0.0445521	0.824543	0.880791	-0.640635	0.0101402	0.0739003	0.1316	-0.2943	0.0772	0.2969	0.2268	-1.3661	-0.0981	0.435	0.7887	NA	NA	0.2334	-0.3719	-0.7707	-0.1416
A0A2R8QHZ3_K1508k_1_1_1508_1508	A0A2R8QHZ3	A0A2R8Q4Q8|A0A2R8QHZ3|A0A2R8QK05|A0A0G2L365|A0A2R8Q9I2|A0A2R8QGS1|A0A2R8Q9M0|A0A0N4SU68	LOC100329748	K1508k	RENkNLQEEIADLTEQIGESGK	0	NA	NA	NA	0.05725	0.892337	0.975151	0.0445521	0.824543	0.880791	-0.640635	0.0101402	0.0739003	0.2435	NA	-0.5038	0.794	-0.9025	-0.3608	0.2736	NA	NA	NA	NA	-1.1855	-0.4256	0.0038	0.0587
A0A2R8QHZ3_K1526k_1_1_1526_1526	A0A2R8QHZ3	A0A2R8Q4Q8|A0A2R8QHZ3|A0A2R8QK05|A0A0G2L365|A0A2R8Q9I2|A0A2R8QGS1|A0A2R8Q9M0|A0A0N4SU68|A0A2R8Q9D2	LOC100329748	K1526k	NLQEEIADLTEQIGESGkNIHELEK	0	NA	NA	NA	-3.03925	2.48665e-05	0.00343446	0.0445521	0.824543	0.880791	-0.640635	0.0101402	0.0739003	NA	NA	-2.915	NA	-1.9573	-2.3257	-2.2165	NA	NA	NA	NA	NA	NA	1.0385	0.707
A0A2R8QHZ3_K1562k_1_1_1562_1562	A0A2R8QHZ3	A0A2R8Q4Q8|A0A2R8QHZ3|A0A2R8Q8V2|A0A2R8Q9I2|A0A2R8QGS1|A0A2R8Q7G9|A0A0N4SU68|A0A2R8Q9D2	LOC100329748	K1562k	AEIQTALEEAEGSLEHEEGkILR	0	NA	NA	NA	-0.95	0.166037	0.501098	0.0445521	0.824543	0.880791	-0.640635	0.0101402	0.0739003	-0.6718	NA	-1.0003	NA	-1.0306	-0.9629	-0.9165	NA	NA	NA	NA	-1.7605	NA	1.0766	0.6239
A0A2R8QHZ3_K1843k_1_1_1843_1843	A0A2R8QHZ3	A0A2R8QHZ3|A0A2R8Q8V2|A0A2R8Q9I2|A0A2R8QGS1	LOC100329748	K1843k	ASESVkGVR	0	1.80917	0.0024545	0.0339801	1.10674	0.0575909	0.305013	0.0445521	0.824543	0.880791	-0.640635	0.0101402	0.0739003	-0.1365	0.8503	1.1455	1.3521	0.0955	0.0362	0.8153	-0.3222	-0.6318	-0.4885	-2.5828	-1.8558	-0.6467	-0.6163	-0.0455
A0A2R8QHZ3_K1900k_1_1_1900_1900	A0A2R8QHZ3	A0A2R8Q4Q8|A0A2R8QHZ3|A0A2R8Q8V2|A0A2R8Q9I2	LOC100329748	K1900k	RAAEEAEEQANSNLGkFRK	0	0.29415	0.355588	0.569623	0.796467	0.0303834	0.219599	0.0445521	0.824543	0.880791	-0.640635	0.0101402	0.0739003	0.4541	1.2508	0.6034	0.4699	-0.1017	0.4566	0.0872	0.4559	0.8041	-0.1288	0.4704	-0.1988	-0.8947	-1.3982	-0.1047
A0A2R8QHZ3_K363k_1_1_363_363	A0A2R8QHZ3	A0A2R8QHZ3|A0A2R8QK05|A0A0G2L365	LOC100329748	K363k	LIGAIMHYGNMkFK	0	0.23645	0.743572	0.865168	1.71613	0.0164629	0.158992	0.0445521	0.824543	0.880791	-0.640635	0.0101402	0.0739003	-1.4618	0.4459	0.3035	1.4102	0.6589	-0.0022	1.0843	NA	-0.3233	0.1993	NA	-2.1935	-0.3837	-1.7763	-0.1897
A0A2R8QHZ3_K559k_1_1_559_559	A0A2R8QHZ3	A0A0G2L365|A0A2R8Q9I2|A0A2R8QGS1|A0A2R8Q9M0|A0A0G2L354|A0A0N4SU68|A0A2R8Q9D2|F1QZW1|A0A2R8Q4Q8|A0A2R8QM44|A0A2R8QHZ3|A0A2R8QK05	LOC100329748	K559k	LYDNHLGkSNNFQK	0	0.454283	0.24235	0.456323	0.514758	0.188237	0.528173	0.0445521	0.824543	0.880791	-0.640635	0.0101402	0.0739003	-0.0168	-0.5793	0.0079	0.8188	-0.0151	-0.1124	0.8047	0.1198	-1.153	-0.1567	NA	-0.6124	-0.3612	-0.2421	0.0596
A0A2R8QHZ3_K598k_1_1_598_598	A0A2R8QHZ3	A0A2R8Q4Q8|A0A2R8QM44|A0A2R8QHZ3|A0A2R8QK05|A0A2R8Q9M0|A0A0G2L354|A0A0N4SU68|A0A2R8Q9D2	LOC100329748	K598k	NkDPLNETVVGLYQK	0	-0.656825	0.0054872	0.0546785	-0.1993	0.377363	0.713535	0.0445521	0.824543	0.880791	-0.640635	0.0101402	0.0739003	0.0095	0.4016	0.2661	-0.133	0.032	-0.2603	-0.2382	0.8846	0.8913	0.8295	0.5661	-0.2486	-0.1172	0.3509	0.1901
A0A2R8QHZ3_K59k_1_1_59_59	A0A2R8QHZ3	A0A2R8QHZ3	LOC100329748	K59k	DGDkVTCETSK	0	0.187475	0.673444	0.816722	-0.181283	0.705799	0.903698	0.0445521	0.824543	0.880791	-0.640635	0.0101402	0.0739003	-0.1467	-0.3511	1.0136	-0.2873	0.0144	-0.5149	0.189	0.0334	0.0172	-0.4964	-0.0756	-1.4727	0.3299	0.6236	0.829
A0A2R8QHZ3_K611k_1_1_611_611	A0A2R8QHZ3	A0A2R8Q4Q8|A0A2R8QHZ3|A0A2R8QK05|A0A0G2L365|A0A2R8Q9I2|A0A2R8QGS1|A0A2R8Q9M0|A0A0G2L354|A0A0N4SU68|A0A2R8Q9D2	LOC100329748	K611k	NKDPLNETVVGLYQkSTMK	0	0.574925	0.241857	0.456323	0.398692	0.446247	0.761626	0.0445521	0.824543	0.880791	-0.640635	0.0101402	0.0739003	0.0402	0.3251	0.3104	0.6849	0.0586	0.4831	0.3342	-0.7037	-0.5353	-0.1126	0.4125	-2.0342	0.5751	0.4893	0.5429
A0A2R8QHZ3_K858k_1_1_858_858	A0A2R8QHZ3	A0A2R8QHZ3|A0A2R8QK05|A0A0G2L365|A0A2R8Q9I2	LOC100329748	K858k	EMANMkEEFLK	0	0.1276	0.640362	0.792886	0.695583	0.0207874	0.179672	0.0445521	0.824543	0.880791	-0.640635	0.0101402	0.0739003	-0.1044	0.3683	0.5648	0.7217	0.0964	0.0304	0.5648	0.0607	0.193	0.5263	NA	-0.7325	-0.037	-0.7346	-0.3561
A0A2R8QHZ3_K915k_1_1_915_915	A0A2R8QHZ3	A0A0G2L365|A0A2R8Q9I2|A0A2R8QGS1|A0A2R8Q9M0|A0A2R8Q4Q8|A0A2R8QM44|A0A2R8QHZ3|A0A2R8QK05	LOC100329748	K915k	CEGLIkNK	0	0.3473	0.571884	0.743468	0.125725	0.763391	0.930568	0.0445521	0.824543	0.880791	-0.640635	0.0101402	0.0739003	-0.0511	0.8586	0.2933	0.334	-0.1086	-1.4792	0.356	NA	0.0114	NA	NA	-0.9289	-0.8237	-0.3132	-0.0795
A0A2R8QI77_K1619k_1_1_1619_1619	A0A2R8QI77	A0A2R8QI77	prx	K1619k	GGAGGDVDVEGHGGkFK	0	0.4782	0.118598	0.302234	0.0829833	0.793934	0.941868	0.477246	0.00647976	0.0317021	0.413468	0.0220483	0.119699	0.4292	0.9375	0.4921	0.7369	0.5932	0.1727	-0.3845	0.3603	0.3025	-0.3198	0.3399	0.4636	0.3435	0.0802	-0.7107
A0A2R8QI77_K1852k_1_1_1852_1852	A0A2R8QI77	A0A2R8QI77	prx	K1852k	AEGGVDVkAHGGK	0	-0.19775	0.60207	0.764029	0.0203417	0.951247	0.990576	0.477246	0.00647976	0.0317021	0.413468	0.0220483	0.119699	-0.5106	-0.3784	0.6095	0.3835	0.0188	-0.6168	0.2016	0.5511	-0.1036	NA	NA	0.1821	-0.3278	-0.3216	-0.1426
A0A2R8QI77_K347k_1_1_347_347	A0A2R8QI77	A0A2R8QI77	prx	K347k	MTIPTFkLPK	0	0.096075	0.812104	0.906002	-0.60825	0.176534	0.514267	0.477246	0.00647976	0.0317021	0.413468	0.0220483	0.119699	0.1247	-0.3199	0.432	0.7404	-0.9717	-0.0093	0.4173	0.2522	0.3529	-0.4935	0.4813	-0.0454	-0.3726	0.7308	1.3686
A0A2R8QI77_K3849k_1_1_3849_3849	A0A2R8QI77	A0A2R8QI77	prx	K3849k	IPkFGIPLPSLTSPEANITPLQIK	0	-0.6452	0.0144319	0.0943681	0.236375	0.363365	0.701827	0.477246	0.00647976	0.0317021	0.413468	0.0220483	0.119699	0.9894	1.7618	1.2032	0.8308	-1.3149	-0.9771	-1.6344	1.7258	1.5744	2.0454	2.0204	-1.4558	-1.7547	-1.4817	-1.4885
A0A2R8QI77_K4058kK4072k_2_0_4055_4058	A0A2R8QI77	A0A2R8QI77	prx	K4058k K4072k	KPGkDEEVQEIGTLVSSk	2	-3.21782	0.00194232	0.0298421	-1.97732	0.0134212	0.142796	0.477246	0.00647976	0.0317021	0.413468	0.0220483	0.119699	NA	-3.0504	-3.3686	-3.24	-3.1347	-3.3067	-3.4006	-0.4129	0.4092	NA	NA	1.0567	-1.2524	-2.6795	-2.3382
A0A2R8QI77_K828k_1_1_828_828	A0A2R8QI77	A0A2R8QI77	prx	K828k	THFETEGNSkSGMK	0	-0.2578	0.543874	0.722536	-0.103783	0.780504	0.938409	0.477246	0.00647976	0.0317021	0.413468	0.0220483	0.119699	1.108	-0.2701	0.8402	0.3301	-0.1702	-1.1161	0.0703	0.6295	0.8902	NA	NA	-0.4525	-0.0867	-0.702	0.035
A0A2R8QI77_K864k_1_1_864_864	A0A2R8QI77	A0A2R8QI77	prx	K864k	EETIDIkSGK	0	-0.370933	0.397167	0.60477	0.13425	0.693589	0.90001	0.477246	0.00647976	0.0317021	0.413468	0.0220483	0.119699	0.0347	NA	-0.8076	-0.1143	-0.3703	-0.2303	-0.0138	NA	0.0752	NA	NA	NA	-0.2948	NA	-0.3833
A0A2R8QI78_K16k_1_1_16_16	A0A2R8QI78	A0A2R8QI78|Q803E5	A0A2R8QI78_K16k_1_1_16_16	K16k	ADDPSAADRNVEIWkIK	0	-3.39668	0.000878975	0.0185441	-1.1229	0.186523	0.526795	-0.122845	0.111472	0.218021	-0.119513	0.147969	0.37174	-1.3298	0.5855	-2.8785	-2.5474	-2.504	-2.3355	-1.258	2.4544	1.8539	1.2541	NA	0.2767	-0.6424	-2.9657	-0.307
A0A2R8QI78_K171k_1_1_171_171	A0A2R8QI78	A0A0R4IPP6|A0A2R8QI78|Q803E5	A0A2R8QI78_K171k_1_1_171_171	K171k	EVLHkFTVDLPK	0	0.238675	0.398805	0.605633	-0.128258	0.671839	0.893718	-0.122845	0.111472	0.218021	-0.119513	0.147969	0.37174	0.3847	-0.0622	0.3973	0.1424	-0.0769	0.3496	0.3062	0.3369	0.4042	0.0293	-0.8629	-0.1158	0.4547	0.6051	0.3409
A0A2R8QIA5_K89k_1_1_89_89	A0A2R8QIA5	A0A2R8QAE5|A0A2R8QQF4|A0A2R8QIA5|E7F8A0	A0A2R8QIA5_K89k_1_1_89_89	K89k	FFSNIkDNLK	0	2.426	0.233008	0.445544	0.1865	0.920136	0.984987	-1.72	0.28679	0.421174	-0.9356	0.585309	0.790341	0.7418	-4.0052	0.7327	2.0933	-2.3556	0.2805	2.1718	-2.1654	-2.9053	NA	NA	NA	-4.2963	1.0172	2.8163
A0A2R8QIN6_K77k_1_1_77_77	A0A2R8QIN6	A0A2R8QEX8|A0A2R8QIN6|Q803J2|Q7T3F3	A0A2R8QIN6_K77k_1_1_77_77	K77k	FMTkIYHPNVDK	0	0.5517	0.0232753	0.124766	1.31355	5.30079e-05	0.00529431	-0.285217	0.129451	0.242105	0.194205	0.325869	0.578846	1.0231	0.8239	0.5669	1.4935	0.2414	0.6089	0.5138	0.6895	0.4089	0.1865	0.4157	-0.804	-0.7605	-1.0789	-0.792
A0A2R8QIN6_K85k_1_1_85_85	A0A2R8QIN6	A0A2R8QEX8|A0A2R8QIN6|Q803J2|Q7T3F3	A0A2R8QIN6_K85k_1_1_85_85	K85k	IYHPNVDkLGR	0	0.244733	0.809882	0.904544	1.7844	0.0954087	0.389985	-0.285217	0.129451	0.242105	0.194205	0.325869	0.578846	1.3251	-0.2637	0.3911	1.1643	0.806	-0.4311	0.4297	0.1077	0.5855	0.5352	NA	-0.0725	-0.6086	-5.4405	0.0568
A0A2R8QIN6_K95k_1_1_95_95	A0A2R8QIN6	A0A2R8QEX8|A0A2R8QIN6|Q803J2|Q7T3F3	A0A2R8QIN6_K95k_1_1_95_95	K95k	ICLDILkDKWSPALQIR	0	0.4935	0.342119	0.556776	-0.172667	0.75504	0.925887	-0.285217	0.129451	0.242105	0.194205	0.325869	0.578846	0.0159	-0.2172	-0.0525	0.2303	0.1335	0.1893	0.2641	0.4816	-0.0304	0.0976	-2.5463	0.941	0.8289	-0.2066	-0.0901
A0A2R8QIN6_K97k_1_1_97_97	A0A2R8QIN6	A0A2R8QIN6|Q803J2|Q7T3F3	A0A2R8QIN6_K97k_1_1_97_97	K97k	DkWSPALQIR	0	1.0549	0.101211	0.279994	0.1827	0.679751	0.896433	-0.285217	0.129451	0.242105	0.194205	0.325869	0.578846	1.3366	0.5386	1.323	1.0366	-1.6996	-0.6721	0.0398	NA	0.0038	NA	NA	-1.2897	NA	-1.1578	-0.4325
A0A2R8QIW0_K90k_1_1_90_90	A0A2R8QIW0	A0A2R8QIW0|F1R653|A0A0R4IDY9	hdac1	K90k	SIRPDNMSEYSkQMQR	0	-0.3283	0.123999	0.310395	0.0609167	0.78339	0.93957	-0.0430095	0.768441	0.840251	0.20258	0.212739	0.45512	0.0932	-0.0126	0.2683	0.159	0.5537	0.423	0.1098	0.1914	0.2189	0.6007	0.8101	0.3166	0.5405	0.2082	0.1397
A0A2R8QIZ3_K176k_1_1_176_176	A0A2R8QIZ3	A0A2R8QKE9|A0A2R8QIZ3|A0A0H2UKR5|Q9DDE0	meis1b	K176k	YISCLkGK	0	0.005125	0.977537	0.990317	-0.232917	0.246942	0.597319	-0.375835	0.00809279	0.0367118	-0.0669679	0.614347	0.809554	0.3516	0.6801	0.5186	0.2045	0.0149	-0.0665	0.2146	0.4396	0.4082	0.2657	0.6208	0.3945	0.2308	0.2211	0.3026
A0A2R8QJ70_K154k_1_1_154_154	A0A2R8QJ70	F1R3I6|A0A2R8QJ70	setb	K154k	EFHLNESGDPSSkSTEIK	0	-0.516575	0.0999982	0.277766	-0.0176833	0.956438	0.991327	0.352488	0.0109426	0.0446287	0.133734	0.315702	0.570333	-0.7205	-0.3885	-0.7118	-0.4613	0.2607	-0.0027	-0.2005	0.1683	0.105	-0.3381	-0.151	0.895	0.362	-0.5052	-0.6044
A0A2R8QJD2_K144k_1_1_144_144	A0A2R8QJD2	A0A2R8QJD2|Q5U3J4	A0A2R8QJD2_K144k_1_1_144_144	K144k	VkELIEFVQDDDRLR	0	NA	NA	NA	-0.7541	0.162952	0.497638	0.39629	0.0081929	0.0368886	0.223955	0.126467	0.340068	NA	NA	NA	NA	NA	-0.8442	NA	NA	NA	NA	NA	NA	NA	-0.019	-0.1612
A0A2R8QJG5_K208k_1_1_208_208	A0A2R8QJG5	Q561X9|A0A2R8QJG5	si:dkey-162b23.4	K208k	IQARPDPEQAFkDFMAR	0	0.1644	0.44903	0.651637	0.406908	0.0950439	0.389912	-0.166691	0.0870374	0.183447	-0.326095	0.00525635	0.0482331	0.3686	0.467	0.4455	-0.2529	0.6088	0.3474	0.6378	0.1361	0.1253	-0.0612	0.1704	0.0966	0.3474	-0.2276	0.2813
A0A2R8QJH4_K456k_1_1_456_456	A0A2R8QJH4	A0A2R8QJH4|F1Q4P9|A2BIP1	atp2a3	K456k	MNVFkTDLSGLSK	0	-0.13865	0.512961	0.701817	0.0456333	0.840951	0.956096	0.610343	0.00192575	0.0148038	0.0576874	0.739329	0.88202	0.1545	0.127	-0.1769	0.3688	0.5573	0.1862	0.5913	0.3289	0.2043	0.0907	0.4041	0.7657	0.311	0.4686	0.0519
A0A2R8QJH5_K101k_1_1_101_101	A0A2R8QJH5	A0A2R8QKN3|A0A2R8QRL2|A0A2R8QAQ7|I3ITC0|A0A0R4IDA7|A0A2R8QJH5|I3IT45|A3KNM2	A0A2R8QJH5_K101k_1_1_101_101	K101k	kTSETLSQVGQK	0	-0.792625	0.00928961	0.0736467	-1.03775	0.00145777	0.0388852	0.135084	0.383779	0.517416	0.194206	0.251719	0.501618	-0.5726	-0.3931	-0.2088	-0.5196	-0.5023	-0.9324	-0.6047	-0.023	0.8093	0.321	NA	0.9225	0.1483	0.1409	0.2201
A0A2R8QJH5_K184k_1_1_184_184	A0A2R8QJH5	A0A2R8QKN3|A0A2R8QRL2|I3ITC0|A0A0R4IDA7|A0A2R8QJH5|A3KNM2	A0A2R8QJH5_K184k_1_1_184_184	K184k	NTPSFkSFEEK	0	0.0116	0.96681	0.984986	-0.0582	0.846831	0.956096	0.135084	0.383779	0.517416	0.194206	0.251719	0.501618	0.1852	0.6151	0.1348	0.1425	0.2539	-0.1438	-0.5055	0.5481	0.2239	-0.0217	0.2809	0.6772	0.0057	-0.3762	-0.6011
A0A2R8QJH5_K189k_1_1_189_189	A0A2R8QJH5	A0A0R4IDA7|A0A2R8QJH5|I3IT45|A3KNM2	A0A2R8QJH5_K189k_1_1_189_189	K189k	SFEEkVETLK	0	-0.0502	0.845924	0.923931	-0.64455	0.0327934	0.228497	0.135084	0.383779	0.517416	0.194206	0.251719	0.501618	0.0232	0.1387	-0.3192	0.0422	0.1244	-0.1601	-0.399	-0.2836	-0.0461	0.0025	0.4129	1.072	0.7305	0.0023	0.1938
A0A2R8QJH5_K63k_1_1_63_63	A0A2R8QJH5	I3ITC0|A0A0R4IDA7|A0A2R8QJH5|I3IT45	A0A2R8QJH5_K63k_1_1_63_63	K63k	VEEEIQTLSQVLAAkEK	0	NA	NA	NA	-0.851667	0.0287985	0.21481	0.135084	0.383779	0.517416	0.194206	0.251719	0.501618	0.324	-0.3044	-0.0132	0.0258	-0.7845	-0.728	-0.3138	NA	NA	NA	NA	-0.6871	0.1504	0.7642	0.7441
A0A2R8QJH5_K73k_1_1_73_73	A0A2R8QJH5	A0A2R8QJH5|I3IT45|A3KNM2	A0A2R8QJH5_K73k_1_1_73_73	K73k	kLGITPLNELK	0	-1.66038	0.117678	0.301706	-0.051675	0.959363	0.991969	0.135084	0.383779	0.517416	0.194206	0.251719	0.501618	-1.6276	-1.7941	-1.5904	-1.2169	0.3535	-2.3024	-1.475	0.7374	0.5226	-0.9506	NA	2.2174	-0.7602	-3.0326	-2.7831
A0A2R8QJH5_K83k_1_1_83_83	A0A2R8QJH5	A0A2R8QKN3|A0A2R8QRL2|A0A2R8QAQ7|I3ITC0|A0A0R4IDA7|A0A2R8QJH5|I3IT45|A3KNM2	A0A2R8QJH5_K83k_1_1_83_83	K83k	LGITPLNELkQNLSK	0	-0.114292	0.767154	0.879102	-0.326717	0.402614	0.731264	0.135084	0.383779	0.517416	0.194206	0.251719	0.501618	0.2092	0.4645	-0.9485	-0.2945	0.4698	-0.1705	-0.1894	0.3155	-0.1735	-0.2261	NA	1.2729	0.1678	-0.0088	0.0215
A0A2R8QJI1_K322k_1_1_322_322	A0A2R8QJI1	A0A2R8QJI1	A0A2R8QJI1_K322k_1_1_322_322	K322k	QkYEKR	0	0.6673	0.240033	0.453751	-0.975608	0.118445	0.427301	0.289558	0.0698291	0.158616	0.224994	0.178611	0.412999	0.0668	0.2449	0.7669	-0.4785	-0.4197	-0.9999	-0.2332	-1.5278	-1.1884	0.4163	0.2308	-1.2929	0.5415	1.1778	1.2723
A0A2R8QJK6_K160k_1_1_160_160	A0A2R8QJK6	B0V224|A0A2R8QJK6|B0V225|B0V226	dcun1d2a	K160k	LEQDLkDSGK	0	-0.0745167	0.897569	0.951697	0.174825	0.718763	0.908788	0.328165	0.0316656	0.0917838	-0.235357	0.133714	0.351526	-1.0412	-0.9967	-0.683	NA	0.5933	-1.2715	0.7139	-1.1507	-0.5142	NA	NA	0.517	-0.9221	-0.3926	0.146
A0A2R8QJK6_K68k_1_1_68_68	A0A2R8QJK6	A0A2R8QJK6|B0V225|B0V226|Q6P007	dcun1d2a	K68k	ESMkSSVDR	0	0.112117	0.690218	0.827227	0.0870333	0.756753	0.926762	0.328165	0.0316656	0.0917838	-0.235357	0.133714	0.351526	-0.5298	-0.091	-0.2344	0.0814	0.3659	0.7211	-0.1881	-0.0786	-0.1969	-0.6412	NA	0.5375	0.326	0.2251	-0.2382
A0A2R8QK17_K3359k_1_1_3359_3359	A0A2R8QK17	A0A2R8QK17	LOC795051	K3359k	FSFSSPTkTTK	0	0.291117	0.492682	0.68871	-0.287483	0.419889	0.740606	0.325386	0.064755	0.150928	0.221173	0.226156	0.470336	-0.097	NA	-0.5633	-0.2059	-0.1738	-0.2223	0.1311	-0.1635	-0.9962	NA	NA	1.0565	0.2829	-0.3617	-0.1811
A0A2R8QK93_K105k_1_1_105_105	A0A2R8QK93	A0A2R8QBX6|A0A2R8RPN8|F6NLJ7|B8A5B7|E7FB41|A0A2R8QK93|F1QEB4	ssrp1a	K105k	DMCVkGWNWGTAK	0	-0.721875	0.0644468	0.223642	-0.02385	0.952144	0.990576	0.582819	0.101136	0.203944	-0.577024	0.129774	0.345988	-0.2007	0.1195	0.2615	0.4646	-0.1218	0.7816	-0.4243	0.1178	0.404	1.3928	1.6178	0.4533	0.5188	-0.342	-0.2207
A0A2R8QLB0_K184k_1_1_184_184	A0A2R8QLB0	E9QD74|A0A0R4IGD7|F1RBD7|A0A2R8QLB0	plcd1a	K184k	kCDTSNSGTLEGSEIK	0	0.102583	0.780741	0.886259	-0.611242	0.0652995	0.325488	0.0112376	0.934723	0.957258	-0.414029	0.0138532	0.0892825	0.3127	NA	0.1044	-0.5694	-0.1794	-0.7312	-0.343	0.0742	-0.3809	NA	NA	-0.0088	-0.247	0.3767	0.6526
A0A2R8QLB0_K326k_1_1_326_326	A0A2R8QLB0	E9QD74|A0A0R4IGD7|F1RBD7|A0A2R8QLB0	plcd1a	K326k	GPSSTEAYIkALMK	0	0.512125	0.126895	0.313773	-0.674375	0.0675253	0.330926	0.0112376	0.934723	0.957258	-0.414029	0.0138532	0.0892825	-0.0818	0.1673	-0.1156	-0.5024	-0.1614	-0.1129	0.2854	-1.0392	-0.8421	-0.1963	-0.5034	-0.302	0.6299	1.3646	1.0198
A0A2R8QLB0_K621k_1_1_621_621	A0A2R8QLB0	E9QD74|A0A0R4IGD7|F1RBD7|A0A2R8QLB0	plcd1a	K621k	FLPNGkSGYILKPEFLR	0	-0.203075	0.655699	0.804573	-0.5589	0.177921	0.51687	0.0112376	0.934723	0.957258	-0.414029	0.0138532	0.0892825	-1.207	-0.2193	-0.6185	0.0049	-0.4381	0.1554	0.013	NA	-0.3509	-0.2629	NA	-0.6402	0.6884	1.0232	0.8046
A0A2R8QM39_K116k_1_1_116_116	A0A2R8QM39	A0A2R8QM39|A8WHY1|Q6NYD6	rab5b	K116k	AWVkELQR	0	-0.44905	0.0617335	0.216697	-0.265067	0.287368	0.637042	0.522244	0.0250323	0.0781211	0.00569779	0.979951	0.990537	0.1157	0.4262	0.8192	0.461	-0.291	-0.0914	-0.0963	0.8468	0.4237	1.2486	1.0992	0.1048	-0.1501	0.3214	0.1459
A0A2R8QME3_K118k_1_1_118_118	A0A2R8QME3	A0A2R8QME3|Q567V5	A0A2R8QME3_K118k_1_1_118_118	K118k	NPLITGk	0	-0.482925	0.0946197	0.27022	0.530767	0.0894792	0.379548	-0.275763	0.248636	0.379323	-0.474039	0.0769228	0.256855	0.4369	0.3914	0.3873	0.1825	0.24	0.6297	-0.0706	1.5483	0.5163	0.4376	0.8276	-0.3617	0.1541	-0.103	-0.747
A0A2R8QMI5_K27k_1_1_27_27	A0A2R8QMI5	A0A0R4IN54|F8W5X7|F1QRX4|A0A2R8QMI5	bin1b	K27k	AQEkVMQK	0	-0.579242	0.0486131	0.191547	0.262542	0.344375	0.687693	1.71197	9.90894e-06	0.000734121	0.897282	0.00479908	0.0450829	0.1406	0.5585	-0.0883	0.1857	-0.1454	-0.0332	-0.0936	1.4414	0.535	0.3587	NA	-0.3932	-0.5516	-0.0643	-0.404
A0A2R8QMI5_K280k_1_1_280_280	A0A2R8QMI5	F8W278|F1QRX4|A0A2R8QMI5	bin1b	K280k	LNQNLSDIMTkLEEQR	0	-0.299067	0.652338	0.801943	-1.28763	0.0534873	0.292314	1.71197	9.90894e-06	0.000734121	0.897282	0.00479908	0.0450829	0.0933	NA	-0.3575	0.283	-0.7595	-0.8045	-1.3101	0.1247	-0.1023	0.8936	NA	-1.0381	-0.7492	2.0855	1.0202
A0A2R8QMI5_K298k_1_1_298_298	A0A2R8QMI5	F1QRX4|A0A2R8QMI5	bin1b	K298k	KGVTTASTGkSDDAANHNQETSDAPK	0	1.37005	0.00517539	0.053041	0.989425	0.0451753	0.267101	1.71197	9.90894e-06	0.000734121	0.897282	0.00479908	0.0450829	1.0129	0.8362	0.346	0.967	-0.0071	0.1324	1.2715	0.222	-1.2075	-0.2301	-1.1025	-1.682	-0.1737	0.1102	-0.3498
A0A2R8QMI5_K34k_1_1_34_34	A0A2R8QMI5	F1QK94|A0A0R4IN54|A0A2R8QHM9|F8W5X7|F1QRX4|A0A2R8QMI5|E9QF57|E7FD40	bin1b	K34k	LGkADETK	0	0.889475	0.00148865	0.0257696	0.560542	0.0390749	0.245213	1.71197	9.90894e-06	0.000734121	0.897282	0.00479908	0.0450829	0.2289	0.2479	0.0144	0.6888	0.3801	0.5624	0.2358	-0.5075	-0.405	-0.6459	-0.8195	-0.708	-0.1241	0.2661	-0.1051
A0A2R8QMI5_K575k_1_1_575_575	A0A2R8QMI5	F8W278|F1QRX4|A0A2R8QMI5	bin1b	K575k	GVFPENFTQkL	0	0.569925	0.438037	0.640571	-0.65315	0.411197	0.734696	1.71197	9.90894e-06	0.000734121	0.897282	0.00479908	0.0450829	-0.1733	-1.1255	-0.3319	-0.2819	-1.4156	-0.268	0.6084	-0.7197	-1.4727	-1.0547	-0.9452	-2.5159	0.3185	1.6151	1.7613
A0A2R8QMI5_K59k_1_1_59_59	A0A2R8QMI5	A0A2R8QMI5|F8W5F8	bin1b	K59k	QMNEGTkLQK	0	-0.528725	0.127837	0.315249	-0.36915	0.220378	0.566415	1.71197	9.90894e-06	0.000734121	0.897282	0.00479908	0.0450829	-1.0026	0.1575	-0.2822	-0.3186	0.2045	-0.0095	-0.3786	NA	0.3877	-0.0532	NA	0.6614	0.1383	0.2114	0.2207
A0A2R8QMV9_K162k_1_1_162_162	A0A2R8QMV9	A0A2R8QMV9|A7YYE9	srp68	K162k	HGDQLEkLCESPNVDAK	0	NA	NA	NA	-0.60165	0.451838	0.763751	-0.0716248	0.581195	0.696643	-0.00443293	0.974629	0.988345	NA	NA	-0.6067	NA	-0.8657	NA	NA	NA	NA	NA	NA	NA	0.4891	NA	-1.0172
A0A2R8QN11_K399k_1_1_399_399	A0A2R8QN11	F1Q8X5|A0A2R8RR15|A0A2R8QN11	fermt2	K399k	KLTLkGYK	0	0.51285	0.0923875	0.267247	1.21466	0.00129641	0.0367199	0.0545465	0.589508	0.703284	0.000995141	0.992686	0.996127	0.0987	0.4274	0.1301	0.5406	0.5243	0.98	0.9894	0.4589	0.0604	-0.7423	-0.6316	0.1133	-0.4539	-0.8548	-0.3383
A0A2R8QN11_K402k_1_1_402_402	A0A2R8QN11	F1Q8X5|A0A2R8RR15|A0A2R8QN11	fermt2	K402k	GYkQYWCTFK	0	1.1877	0.000322506	0.0107213	0.88485	0.0060095	0.0868683	0.0545465	0.589508	0.703284	0.000995141	0.992686	0.996127	0.3767	0.7993	0.1462	1.0659	0.9598	0.5626	0.613	-0.9458	-0.2496	-0.1675	-0.9998	-0.0094	-0.3454	-0.0713	-0.2661
A0A2R8QN59_K31k_1_1_31_31	A0A2R8QN59	A0A2R8QN59|A0A2R8RUD6|E9QE61	A0A2R8QN59_K31k_1_1_31_31	K31k	VLkSGELGIVEK	0	0.2439	0.78206	0.886992	-0.770667	0.155753	0.486481	0.1307	0.776829	0.846212	-0.0830285	0.86746	0.94096	-0.1358	NA	NA	NA	-0.4863	-1.1578	-0.3512	NA	-0.3797	NA	NA	1.2145	-0.5053	NA	-0.3925
A0A2R8QN78_K177k_1_1_177_177	A0A2R8QN78	B8A436|A0A2R8QNA6|A0A2R8QU03|A0A2R8PWS1|A0A2R8QP02|A0A2R8QQ83|A0A2R8RNW6|F1Q5K7|A0A2R8QN78	sorbs2b	K177k	DWYkTMFK	0	NA	NA	NA	0.592133	0.137149	0.462125	-0.136912	0.211336	0.33776	-0.245031	0.0485311	0.194172	0.1308	0.2778	0.3796	0.6934	-0.3513	0.5872	0.0482	NA	NA	NA	NA	-0.6369	NA	0.2476	-1.103
A0A2R8QNE6_K314k_1_1_314_314	A0A2R8QNE6	Q6NYE2|A0A2R8QNE6	rcc2	K314k	TkDGQVLPVPNVVAR	0	-0.39225	0.181807	0.385027	-0.165242	0.593089	0.85111	0.0277197	0.84817	0.898313	0.193697	0.228787	0.474253	0.398	-0.4525	-0.032	0.0658	-0.5448	0.5216	0.0506	0.5028	0.1371	0.6818	0.2266	-0.4126	0.5716	0.216	0.3225
A0A2R8QNE6_K37k_1_1_37_37	A0A2R8QNE6	Q6NYE2|E9QCP1|E9QGE3|A0A2R8QNE6	rcc2	K37k	KVTDVSGNGGLkR	0	-0.338975	0.231172	0.443941	0.179492	0.549875	0.825601	0.0277197	0.84817	0.898313	0.193697	0.228787	0.474253	0.7657	-0.2316	0.5446	-0.1667	-0.0264	0.1128	0.188	0.6508	0.9019	0.4934	0.2218	0.2334	0.1383	-0.6649	-0.0589
A0A2R8QNE6_K425k_1_1_425_425	A0A2R8QNE6	Q6NYE2|A0A2R8QNE6	rcc2	K425k	AVQDLCGWkIR	0	0.140425	0.497038	0.690722	0.594617	0.0154885	0.154364	0.0277197	0.84817	0.898313	0.193697	0.228787	0.474253	0.4081	0.3361	0.5652	0.496	0.2645	-0.0355	0.7087	0.3071	0.043	0.305	0.5886	-0.2961	-0.4519	-0.1265	-0.2537
A0A2R8QNL1_K413k_1_1_413_413	A0A2R8QNL1	F1R4L5|F8W4R4|A0A2R8QNL1|A0A2R8PYS8	A0A2R8QNL1_K413k_1_1_413_413	K413k	QLQMSLkESNNAQR	0	-0.722233	0.274456	0.485333	0.4776	0.274563	0.625175	0.130442	0.396658	0.529713	-0.310898	0.0753706	0.253945	-0.5993	NA	0.2716	-0.7002	-0.0456	0.6981	-0.2721	0.3796	NA	NA	NA	0.458	-1.2531	-0.2475	-0.3606
A0A2R8QNL1_K531k_1_1_531_531	A0A2R8QNL1	F1R4L5|F8W4R4|A0A2R8QNL1|A0A2R8PYS8	A0A2R8QNL1_K531k_1_1_531_531	K531k	ISELLSkLEQR	0	NA	NA	NA	-0.775625	0.193527	0.532675	0.130442	0.396658	0.529713	-0.310898	0.0753706	0.253945	0.4262	NA	-0.697	NA	-0.5919	-0.8222	-1.246	NA	NA	NA	NA	-1.6561	-0.1768	0.9217	0.4669
A0A2R8QNL1_K553k_1_1_553_553	A0A2R8QNL1	F1R4L5|F8W4R4|A0A2R8QNL1	A0A2R8QNL1_K553k_1_1_553_553	K553k	LQkTDSSSSSTR	0	-0.530375	0.430589	0.633709	-0.171175	0.706738	0.903923	0.130442	0.396658	0.529713	-0.310898	0.0753706	0.253945	-0.5588	-0.0679	0.2134	-0.0702	-1.3086	0.237	0.1767	NA	0.4095	NA	NA	-1.1428	-0.066	0.2058	0.4945
A0A2R8QP51_K385k_1_1_385_385	A0A2R8QP51	A0A2R8QP51|A0A2R8QM73|B0V1L8	A0A2R8QP51_K385k_1_1_385_385	K385k	DGkFAWAVLLDR	0	2.15393	0.224392	0.434703	-1.08967	0.346012	0.689392	0.222125	0.0421433	0.110856	-0.0647973	0.552798	0.767579	-0.328	NA	-1.6734	-0.2227	-3.408	0.1734	-0.2658	NA	-2.8953	NA	NA	-3.2545	1.222	0.6527	1.0713
A0A2R8QPG3_K105k_1_1_105_105	A0A2R8QPG3	A0A2R8QPG3|B3DKC5	lmna	K105k	LQLELSkVR	0	-0.0203833	0.940868	0.974365	-0.183958	0.506601	0.798373	0.101204	0.48968	0.615554	0.0468193	0.765538	0.895195	0.4	-0.0516	0.2286	-0.5076	0.0685	-0.2984	0.4383	-0.1656	0.0668	0.212	NA	0.5794	0.1212	0.3646	-0.0515
A0A2R8QPG3_K132k_1_1_132_132	A0A2R8QPG3	A0A2R8QPG3|B3DKC5	lmna	K132k	LkDLESLLNSK	0	-0.089275	0.661107	0.808645	-0.2964	0.189363	0.528815	0.101204	0.48968	0.615554	0.0468193	0.765538	0.895195	0.387	-0.0448	0.1172	0.2188	-0.0651	-0.1197	0.1848	0.5394	0.1656	0.4175	-0.0872	0.5267	0.298	0.0701	0.2908
A0A2R8QPG3_K141k_1_1_141_141	A0A2R8QPG3	A0A2R8QPG3|B3DKC5	lmna	K141k	DLESLLNSkDASLSTALGEK	0	0.446675	0.0801606	0.246923	-0.49725	0.0721848	0.342191	0.101204	0.48968	0.615554	0.0468193	0.765538	0.895195	-0.4228	0.189	-0.1318	0.0574	-0.2527	0.2204	0.2591	-0.1035	-0.9783	-0.2988	-0.7143	0.3245	0.7849	0.4419	0.7401
A0A2R8QPG3_K168k_1_1_168_168	A0A2R8QPG3	A0A2R8QPG3|B3DKC5	lmna	K168k	AQLAkLEGSLNDAKK	0	-0.0171	0.925456	0.967345	-0.37655	0.0713631	0.341111	0.101204	0.48968	0.615554	0.0468193	0.765538	0.895195	0.4616	0.5046	0.418	0.184	-0.1706	-0.1112	0.0373	0.1329	0.422	0.4289	0.6528	0.2351	0.2235	0.2562	0.4654
A0A2R8QPG3_K177k_1_1_177_177	A0A2R8QPG3	A0A2R8QPG3|B3DKC5	lmna	K177k	LEGSLNDAkK	0	-0.263575	0.377099	0.587788	-0.0514667	0.871505	0.966494	0.101204	0.48968	0.615554	0.0468193	0.765538	0.895195	0.2801	0.2747	0.2174	-0.1464	0.2404	-0.5897	0.7754	0.2172	0.2948	0.3837	0.7844	0.5339	-0.4242	0.2375	0.4268
A0A2R8QPG3_K198k_1_1_198_198	A0A2R8QPG3	A0A2R8QPG3|B3DKC5	lmna	K198k	IQTLkEELEFQK	0	-0.463975	0.0319774	0.147096	-0.468867	0.0429127	0.258835	0.101204	0.48968	0.615554	0.0468193	0.765538	0.895195	-0.5657	-0.2063	-0.4533	-0.3168	0.0046	0.1031	0.1366	0.21	-0.1833	0.2204	0.0667	0.2968	0.9217	0.3335	0.6492
A0A2R8QPG3_K237k_1_1_237_237	A0A2R8QPG3	A0A2R8QPG3|B3DKC5	lmna	K237k	QQDYESkLADALTDLR	0	0.990592	0.0756436	0.23978	-1.15623	0.0418498	0.254733	0.101204	0.48968	0.615554	0.0468193	0.765538	0.895195	0.354	-2.1909	-0.4476	-0.8114	-0.1889	-0.4844	-0.3036	-1.8827	-2.4386	-0.9724	NA	-0.1161	1.1874	1.107	1.1441
A0A2R8QPG3_K267k_1_1_267_267	A0A2R8QPG3	A0A2R8QPG3|B3DKC5	lmna	K267k	TYNSkLENAR	0	-0.137133	0.678802	0.818701	-0.358867	0.287044	0.637042	0.101204	0.48968	0.615554	0.0468193	0.765538	0.895195	0.4287	0.7906	-0.1722	-0.6731	-0.1375	-0.0071	0.0886	0.593	-0.316	0.4149	NA	0.2016	0.2823	0.3035	0.5734
A0A2R8QPG3_K308k_1_1_308_308	A0A2R8QPG3	A0A2R8QPG3|B3DKC5	lmna	K308k	VRMEGVSSQLSQLQkQLAAR	0	0.40565	0.143537	0.338397	0.259392	0.375348	0.711651	0.101204	0.48968	0.615554	0.0468193	0.765538	0.895195	0.6908	0.338	0.8058	0.6656	-0.1837	0.0761	0.4393	-0.2291	0.2279	0.8437	0.0351	-0.4092	-0.2671	-0.3302	0.4112
A0A2R8QPG3_K475k_1_1_475_475	A0A2R8QPG3	A0A2R8QPG3|B3DKC5	lmna	K475k	LNNkSDQDQSLGHWQVK	0	0.044525	0.856027	0.92901	-0.3998	0.145653	0.472218	0.101204	0.48968	0.615554	0.0468193	0.765538	0.895195	-0.4443	-0.3552	-0.8906	-0.4579	0.1468	0.0959	0.2607	-0.128	-0.4204	-0.4628	-1.3149	0.4903	0.6622	0.393	0.7249
A0A2R8QPG3_K94k_1_1_94_94	A0A2R8QPG3	A0A2R8QPG3|B3DKC5	lmna	K94k	TLDSVAkER	0	0.23115	0.38031	0.590352	-0.236933	0.404486	0.73168	0.101204	0.48968	0.615554	0.0468193	0.765538	0.895195	0.2876	0.0097	0.2448	-0.5324	0.1759	-0.0984	0.1474	0.2194	0.1193	-0.795	-0.4586	0.118	0.3041	0.2835	0.542
A0A2R8QPW3_K35k_1_1_35_35	A0A2R8QPW3	B0S6R1|A0A2U3TVM3|T1ECV5|A0A2R8QPW3	A0A2R8QPW3_K35k_1_1_35_35	K35k	IYNIkK	0	0.174125	0.36423	0.578248	0.527058	0.0191781	0.172151	-0.860461	6.77524e-07	0.000153459	-0.830985	2.32238e-06	0.000507801	0.2688	0.8165	0.4577	0.6853	0.2366	0.1965	0.509	0.3889	0.149	0.4825	0.5114	-0.1738	-0.144	-0.2325	-0.3018
A0A2R8QPX7_K107k_1_1_107_107	A0A2R8QPX7	Q7ZVK4|F1QFF9|A0A2R8QPX7|E9QGR9|E9QH92	A0A2R8QPX7_K107k_1_1_107_107	K107k	YSYIkLSFK	0	1.03405	0.0199272	0.113264	0.656858	0.146563	0.473704	-0.19427	0.0232566	0.0740304	-0.30134	0.00273832	0.0329533	1.1222	0.7903	0.8287	1.7153	-0.1157	0.3307	0.2828	-0.6255	-0.371	0.645	0.6718	-1.6481	0.2425	-0.4238	-0.1343
A0A2R8QPX7_K147k_1_1_147_147	A0A2R8QPX7	Q7ZVK4|F1QFF9|A0A2R8QPX7|E9QGR9	A0A2R8QPX7_K147k_1_1_147_147	K147k	RWENTPVSQPIPTGTGPkAGR	0	-0.422217	0.22523	0.435276	0.454608	0.193454	0.532675	-0.19427	0.0232566	0.0740304	-0.30134	0.00273832	0.0329533	-0.1209	0.1875	0.1778	-0.7522	0.8814	0.1461	-0.2537	0.3923	0.4251	0.0684	NA	-0.4251	-0.0392	-0.6892	0.3668
A0A2R8QPX7_K326k_1_1_326_326	A0A2R8QPX7	Q7ZVK4|F1QFF9|A0A2R8QPX7	A0A2R8QPX7_K326k_1_1_326_326	K326k	IFESLkLPLR	0	NA	NA	NA	0.2726	0.62903	0.874591	-0.19427	0.0232566	0.0740304	-0.30134	0.00273832	0.0329533	-0.9983	NA	0.4738	NA	-0.7134	-0.0353	0.2931	NA	NA	NA	NA	NA	-1.4972	0.1176	0.1062
A0A2R8QPZ9_K635k_1_1_635_635	A0A2R8QPZ9	A0A2R8QPZ9|A0A0R4IDX7	tshz3b	K635k	NSGKSSPLKYMFSGEELLSPTk	0	-0.0264	0.942488	0.975531	-0.571875	0.161809	0.496919	0.218187	0.567521	0.684783	0.153489	0.708584	0.864895	0.2558	0.4933	1.6376	0.4699	-0.2847	-0.5304	-1.2876	0.6405	1.1236	0.8245	0.3736	-0.9687	-0.0927	0.544	0.0013
A0A2R8QQY8_K128k_1_1_128_128	A0A2R8QQY8	A0A2R8QQY8|Q6P603	anxa2a	K128k	ASIkGLGTDEESLIEILCSR	0	-0.351133	0.663397	0.810148	-0.0232667	0.976914	0.993504	0.520878	0.180316	0.303575	-0.152342	0.70748	0.864046	-0.122	2.3212	-0.9026	-0.0334	0.3825	-1.5223	-0.4834	-0.402	NA	1.9869	0.4159	-2.1645	-0.274	0.1344	0.2329
A0A2R8QQY8_K187k_1_1_187_187	A0A2R8QQY8	A0A2R8QQY8|Q6P603	anxa2a	K187k	LLLALVEAkR	0	NA	NA	NA	-0.202867	0.769701	0.931683	0.520878	0.180316	0.303575	-0.152342	0.70748	0.864046	NA	NA	-0.198	-1.3192	NA	-1.3764	0.1818	NA	NA	NA	NA	NA	0.0016	-1.4761	0.2912
A0A2R8QQY8_K213k_1_1_213_213	A0A2R8QQY8	A0A2R8QQY8|Q6P603	anxa2a	K213k	ALYDAGVkR	0	0.0733	0.72743	0.852914	0.270608	0.24352	0.593399	0.520878	0.180316	0.303575	-0.152342	0.70748	0.864046	-0.177	0.0148	0.5273	0.3727	0.1645	0.1106	0.4732	0.1855	0.1355	0.2132	-0.0896	0.2356	-0.1376	-0.2247	0.042
A0A2R8QQY8_K58k_1_1_58_58	A0A2R8QQY8	A0A2R8QQY8|Q6P603	anxa2a	K58k	TkGVDEQTIIDILTK	0	-0.36835	0.0891573	0.262831	-0.335767	0.145905	0.472668	0.520878	0.180316	0.303575	-0.152342	0.70748	0.864046	-0.6004	-0.2003	0.2169	-0.1563	0.2991	0.127	-0.0825	0.2499	0.216	0.2921	-0.0247	0.5057	0.616	0.3672	0.3123
A0A2R8QR17_K1467k_1_1_1467_1467	A0A2R8QR17	A0A0R4IJ71|E9QCV2|A0A2R8QR17|E7F4T0	A0A2R8QR17_K1467k_1_1_1467_1467	K1467k	NLSEQQIkSK	0	0.68985	0.11843	0.302204	0.214867	0.458155	0.768542	-0.0154146	0.936887	0.958036	0.205009	0.338488	0.591608	0.3135	0.9353	0.2621	-0.1719	-0.1614	-0.0539	0.1537	NA	-0.3551	NA	NA	-0.514	-0.3399	0.1526	-0.2403
A0A2R8QR17_K1614k_1_1_1614_1614	A0A2R8QR17	A0A2R8QR17|E7F4T0	A0A2R8QR17_K1614k_1_1_1614_1614	K1614k	SASAELQSkR	0	-0.44175	0.16889	0.37036	0.0330583	0.921567	0.985764	-0.0154146	0.936887	0.958036	0.205009	0.338488	0.591608	0.4757	-0.4421	0.7189	1.0387	-0.2033	0.3093	-0.3561	0.6734	0.5383	1.3714	0.9751	-0.2334	-0.4212	-0.0485	0.2374
A0A2R8QR17_K2073k_1_1_2073_2073	A0A2R8QR17	A0A0R4IJ71|E9QCV2|A0A2R8QR17|E7F4T0	A0A2R8QR17_K2073k_1_1_2073_2073	K2073k	QIYAAkEAAEK	0	-0.670725	0.0783094	0.243805	0.111375	0.724874	0.911188	-0.0154146	0.936887	0.958036	0.205009	0.338488	0.591608	-0.5201	-0.6038	-0.5669	-0.9895	0.2401	0.1676	-0.4755	-0.4072	0.4085	NA	NA	0.3149	0.1952	-0.3789	-0.6671
A0A2R8QR17_K2642k_1_1_2642_2642	A0A2R8QR17	A0A0R4IJ71|E9QCV2|A0A2R8QR17|E7F4T0	A0A2R8QR17_K2642k_1_1_2642_2642	K2642k	ITQEIHIQTDCkK	0	0.42405	0.0626717	0.219212	0.2476	0.294296	0.643567	-0.0154146	0.936887	0.958036	0.205009	0.338488	0.591608	-0.2093	0.4061	-0.0866	-0.0968	0.6666	0.603	0.2031	-0.5162	-0.2431	-0.4262	-0.4973	0.604	0.3121	-0.0075	0.0646
A0A2R8QR17_K2885k_1_1_2885_2885	A0A2R8QR17	A0A0R4IJ71|E9QCV2|A0A2R8QR17|E7F4T0	A0A2R8QR17_K2885k_1_1_2885_2885	K2885k	GFYDPNTEENLTYSQLMkR	0	NA	NA	NA	-0.3583	0.597928	0.853718	-0.0154146	0.936887	0.958036	0.205009	0.338488	0.591608	NA	NA	NA	NA	-0.461	NA	NA	NA	NA	NA	NA	NA	NA	0.4727	-0.6781
A0A2R8QR17_K3017k_1_1_3017_3017	A0A2R8QR17	A0A0R4IJ71|E9QCV2|A0A2R8QR17|E7F4T0	A0A2R8QR17_K3017k_1_1_3017_3017	K3017k	LQkGQLLVK	0	-0.3471	0.219713	0.429211	0.0175083	0.949252	0.989998	-0.0154146	0.936887	0.958036	0.205009	0.338488	0.591608	-0.6597	-0.2968	-0.2381	-0.1398	0.1712	0.7164	0.2135	-0.4559	-0.0463	0.5427	NA	0.1739	0.7329	0.3033	0.188
A0A2R8QR17_K3391k_1_1_3391_3391	A0A2R8QR17	A0A2R8QKW7|A0A0R4IJ71|E9QCV2|A0A2R8QR17|E7F4T0	A0A2R8QR17_K3391k_1_1_3391_3391	K3391k	VSIYQAMkK	0	-0.2347	0.675959	0.817184	0.194233	0.604822	0.859171	-0.0154146	0.936887	0.958036	0.205009	0.338488	0.591608	NA	-0.2332	-0.1758	NA	0.5646	-0.1492	-0.6184	NA	0.0302	NA	NA	0.1732	-0.6782	NA	-0.2807
A0A2R8QR17_K3794k_1_1_3794_3794	A0A2R8QR17	A0A0R4IJ71|A5WV02|A0A2R8PVX9|A0A286YBE9|A0A2R8PZA9|A0A2R8QKW7|A0A2R8QR17|E7F4T0	A0A2R8QR17_K3794k_1_1_3794_3794	K3794k	VISLFQAMkK	0	NA	NA	NA	-0.727975	0.071217	0.340801	-0.0154146	0.936887	0.958036	0.205009	0.338488	0.591608	0.0245	-1.44	-0.3754	0.2008	-0.4746	-0.5248	-0.1706	NA	NA	NA	NA	-0.0144	0.0682	0.6024	0.6957
A0A2R8QR17_K3838k_1_1_3838_3838	A0A2R8QR17	E9QCV2|A0A2R8QR17|E7F4T0	A0A2R8QR17_K3838k_1_1_3838_3838	K3838k	GYINkETNEK	0	-0.09385	0.735536	0.860118	-0.433817	0.161442	0.496527	-0.0154146	0.936887	0.958036	0.205009	0.338488	0.591608	0.0725	-0.406	0.0392	-0.158	0.3361	-0.8059	0.2902	0.0775	0.365	0.0762	-0.5956	0.5593	0.36	0.2697	0.3068
A0A2R8QR17_K4379k_1_1_4379_4379	A0A2R8QR17	A0A2R8RIJ1|A0A0R4INC4|A0A2R8QKW7|A0A2R8QR17|E7F8G7|A0A2R8QLG6|A0A286YBE9|A0A2R8PZA9|E7F4T0	A0A2R8QR17_K4379k_1_1_4379_4379	K4379k	MSAAQALkK	0	-0.233075	0.528646	0.713032	0.121658	0.759555	0.928025	-0.0154146	0.936887	0.958036	0.205009	0.338488	0.591608	-0.3687	0.9176	0.5447	-0.1279	0.2191	0.45	0.1125	-0.3854	0.27	0.5852	1.4282	0.4158	0.4365	-0.341	0.0442
A0A2R8QR17_K4443k_1_1_4443_4443	A0A2R8QR17	A0A0R4IJ71|E7F8G7|A0A2R8QLG6|A0A286YBE9|A0A2R8PZA9|A0A2R8RIJ1|A0A0R4INC4|A0A2R8QKW7|A0A2R8QR17|E7F4T0	A0A2R8QR17_K4443k_1_1_4443_4443	K4443k	YLTCPkTK	0	-0.03185	0.879936	0.942601	0.278625	0.232381	0.584369	-0.0154146	0.936887	0.958036	0.205009	0.338488	0.591608	0.3678	0.6224	0.4065	0.5552	-0.0588	-0.0282	0.5316	0.7459	0.3035	0.4722	0.5577	-0.3907	-0.3108	-0.0056	0.1854
A0A2R8QRE7_K153k_1_1_153_153	A0A2R8QRE7	A0A2R8QRE7|Q7ZV49	A0A2R8QRE7_K153k_1_1_153_153	K153k	TLLELLkQYNPK	0	0.3963	0.334525	0.550646	-0.489183	0.184069	0.524197	-0.0481084	0.718411	0.802936	-0.390773	0.016035	0.0987167	-0.2015	-0.5867	0.4598	-0.444	-0.1128	-0.2082	-0.5062	-0.4021	-0.7767	NA	NA	-0.7001	0.2704	0.7154	0.5681
A0A2R8QRE7_K161k_1_1_161_161	A0A2R8QRE7	A0A2R8QRE7|Q7ZV49	A0A2R8QRE7_K161k_1_1_161_161	K161k	MVkVASLLVK	0	-0.911933	0.37045	0.582102	-2.06197	0.0132823	0.141678	-0.0481084	0.718411	0.802936	-0.390773	0.016035	0.0987167	-0.8834	NA	-0.4141	-0.6745	-3.2842	0.2523	-1.2399	NA	NA	NA	0.2546	NA	0.558	0.5849	0.7712
A0A2R8QRU4_K411k_1_1_411_411	A0A2R8QRU4	A0A2R8QRU4	cald1a	K411k	NIkSMFEK	0	-0.56205	0.0484271	0.19142	-0.288642	0.28574	0.635786	0.130511	0.373465	0.508156	0.023081	0.882331	0.948925	-0.1666	-0.0703	0.2582	0.1201	0.2647	-0.6726	-0.0036	0.5538	0.7202	0.5182	NA	0.5584	0.0647	0.211	-0.2282
A0A2R8QRU4_K437k_1_1_437_437	A0A2R8QRU4	A0A2R8QRU4	cald1a	K437k	DAAGIkVGVAGR	0	0.244425	0.277721	0.486604	-0.0170667	0.942925	0.989668	0.130511	0.373465	0.508156	0.023081	0.882331	0.948925	0.0682	0.7687	0.5792	0.5713	0.0055	-0.0664	0.0013	0.5187	0.4784	-0.0698	0.0824	0.0048	-0.2488	0.3281	-0.0953
A0A2R8QRW5_K45k_1_1_45_45	A0A2R8QRW5	A0A2R8QRW5|B0V1J9	gstt2	K45k	KGEQkTPEFTK	0	-1.09388	0.000682936	0.0159591	0.00519167	0.983892	0.994328	0.37347	0.00923373	0.0397333	0.103851	0.44493	0.684023	-0.3926	-0.4598	0.012	-0.2494	-0.3762	0.4407	-0.2914	0.6673	0.855	0.942	NA	-0.0032	-0.5061	0.1419	0.0441
A0A2R8QS07_K2730k_1_1_2730_2730	A0A2R8QS07	A0A2R8PWZ0|A0A2R8Q4H1|A0A2R8QS07	A0A2R8QS07_K2730k_1_1_2730_2730	K2730k	PYkCLSEK	0	-0.0357833	0.947053	0.976657	-1.19591	0.0402359	0.249141	-1.61478	0.0332848	0.0953013	0.211984	0.77659	0.902053	-0.2643	-1.3633	-0.4374	0.1508	0.0519	-0.4835	0.4699	-0.03	-0.281	-1.0173	NA	-0.4234	1.3707	2.1297	1.7577
A0A2R8QT19_K698k_1_1_698_698	A0A2R8QT19	E7F4S3|A0A0R4IQ17|E7F173|A0A2R8QT19|A0A2R8Q7M9|Q7ZVL1	osbpl1a	K698k	FWGkSVEAEPK	0	-0.777725	0.0291958	0.141425	-0.01245	0.971981	0.992673	1.58034	0.00132296	0.0117019	1.54432	0.00274699	0.0329533	-0.6403	0.717	0.2534	0.1243	0.3888	0.0581	0.2965	0.8667	0.6958	1.1465	0.8563	1.0053	0.225	-0.5968	0.4075
A0A2R8QT99_K259k_1_1_259_259	A0A2R8QT99	A0A2R8Q6Z5|A0A0R4IRL4|A0A2R8QT99	abcd3a	K259k	MTVTEQkYEGEYR	0	-0.758175	0.054724	0.204234	0.102942	0.797028	0.943123	-0.665318	0.01015	0.0423624	-0.188303	0.444322	0.684023	0.2936	-0.4023	-0.0717	0.4799	0.2974	-0.493	0.3977	1.7185	0.9098	0.7996	-0.0957	0.6536	-0.119	-0.4555	-0.2214
A0A2R8QTF0_K342k_1_1_342_342	A0A2R8QTF0	A0A2R8QTS1|A0A2R8QRZ0|A0A2R8QTF0	csde1	K342k	VPTkNQNDPLPGR	0	-0.398858	0.104473	0.285425	-0.278333	0.245802	0.596041	0.221838	0.123126	0.233303	-0.0606126	0.683207	0.850719	-0.0448	-0.0085	-0.1625	-0.2659	-0.0795	-0.1244	0.0514	0.2502	0.2724	0.3127	NA	0.6652	0.3469	-0.3153	0.2132
A0A2R8RHQ9_K397k_1_1_397_397	A0A2R8RHQ9	A0A2R8RHQ9|A0A0R4IEQ0|B3DI16|F6PAM1	gna11a	K397k	DTILQHNLkEYNLV	0	0.0477	0.86615	0.934412	0.384233	0.22036	0.566415	0.179119	0.0888435	0.185894	-0.251013	0.0330121	0.151798	0.2437	0.5192	0.5796	0.6975	0.699	-0.3226	0.4337	0.4419	0.5966	-0.2535	1.0642	-0.0749	0.0523	-0.2606	-0.1736
A0A2R8RHU1_K418k_1_1_418_418	A0A2R8RHU1	A0A2R8RHU1|A0A0R4IVY2	A0A2R8RHU1_K418k_1_1_418_418	K418k	IREIVQQVkQQER	0	NA	NA	NA	0.23935	0.580584	0.847051	-0.969452	0.0450311	0.116249	-0.233634	0.628609	0.818819	-0.1401	NA	NA	NA	-0.4435	NA	0.2017	NA	NA	NA	NA	NA	-0.1355	NA	-0.585
A0A2R8RIN6_K146k_1_1_146_146	A0A2R8RIN6	Q6NWC6|A0A2R8RIN6	cpsf6	K146k	LMDLLSkR	0	-0.0463	0.91252	0.960343	0.55655	0.150665	0.480248	0.0573253	0.53635	0.657886	0.0963084	0.341301	0.593578	0.7661	-0.0716	0.9236	-0.3701	0.3869	0.2521	0.1722	0.8383	-0.1217	NA	NA	-0.3404	-0.1159	-0.8688	0.1805
A0A2R8RJ84_K174k_1_1_174_174	A0A2R8RJ84	A0A2R8RJ84|F1R5P8|A0A0R4IWU8	si:dkey-73n8.3	K174k	IHFEDLNSEkNYHPVK	0	-0.686333	0.0667825	0.227129	-0.225358	0.524713	0.81039	0.65941	0.00446953	0.0248073	0.663984	0.00697663	0.0577233	-0.4608	-0.0515	-0.2743	-0.3378	0.6133	-0.3714	-0.305	0.7288	0.755	-0.2681	NA	0.9192	0.2356	-0.201	-0.1365
A0A2R8RJW1_K831k_1_1_831_831	A0A2R8RJW1	A0A2R8RJW1|A0A0R4IJ92	si:ch1073-296d18.1	K831k	IENkILR	0	NA	NA	NA	-0.131275	0.833934	0.953886	1.53138	0.00568991	0.0291424	0.740955	0.161763	0.389802	NA	NA	-1.4097	NA	-0.2792	-0.0272	-0.9401	NA	NA	NA	NA	0.9892	0.0742	-1.9727	-0.2276
A0A2R8RK22_K120k_1_1_120_120	A0A2R8RK22	A0A2R8RK22|A0JMP4|Q5U3A4|Q642Z0	atp2a1l	K120k	NAESAIEALkEYEPEMGK	0	-0.2827	0.59167	0.756756	-0.775808	0.110662	0.415574	1.22744	0.000476902	0.00628797	0.416812	0.16828	0.398604	-0.8305	-0.6623	-0.7235	-1.0239	-0.3044	0.3708	-0.3821	-0.407	-0.6477	NA	NA	-0.8154	1.6498	1.2008	0.6471
A0A2R8RK22_K128k_1_1_128_128	A0A2R8RK22	A2BIP1|A0JMP4|Q5U3A4|Q642Z0|A0A0R4IVG9|A9C3Q5|A0A2R8RK22|Q6ZM60|A0A2R8QJH4|F1Q4P9|A9C3Q4|A0A0R4IQS8	atp2a1l	K128k	EYEPEMGkVYR	0	-1.0539	0.00662258	0.0605056	-0.364367	0.28984	0.639814	1.22744	0.000476902	0.00628797	0.416812	0.16828	0.398604	-0.0071	0.13	-0.2303	-0.3502	0.4548	-0.7955	-0.42	1.3271	1.0629	0.4285	NA	0.7461	-0.1613	-0.0452	-0.0964
A0A2R8RK22_K135k_1_1_135_135	A0A2R8RK22	A0A2R8RK22	atp2a1l	K135k	SDRkSVQMIK	0	-0.587975	0.0147288	0.0950524	0.19785	0.404451	0.73168	1.22744	0.000476902	0.00628797	0.416812	0.16828	0.398604	0.8349	1.42	0.9334	1.0747	-0.9116	-1.0307	-0.7667	1.5398	1.531	1.9088	1.6353	-1.3819	-1.3979	-0.8428	-0.7808
A0A2R8RK22_K141k_1_1_141_141	A0A2R8RK22	A0A2R8RK22|A0JMP4	atp2a1l	K141k	SVQMIkAR	0	2.08465	0.0648528	0.224264	1.34813	0.251541	0.602399	1.22744	0.000476902	0.00628797	0.416812	0.16828	0.398604	1.5148	0.9404	0.6732	1.2809	-0.1565	-0.1051	0.3105	-0.5263	0.4181	-0.4304	-3.3907	-5.4775	-0.2125	0.6822	-0.3195
A0A2R8RK22_K205k_1_1_205_205	A0A2R8RK22	A0A0R4IVG9|A9C3Q5|A0A2R8RK22|Q6ZM60|A9C3Q4|A0A0R4IQS8|A0JMP4|Q5U3A4|Q642Z0	atp2a1l	K205k	kNMLFSGTNIAAGK	0	0.3291	0.248538	0.462472	-0.05395	0.857875	0.96106	1.22744	0.000476902	0.00628797	0.416812	0.16828	0.398604	0.8674	0.2976	0.7825	0.2547	0.5131	-0.4884	0.3089	0.2664	0.7589	0.0917	-0.2312	0.466	-0.0822	0.2422	0.0346
A0A2R8RK22_K365k_1_1_365_365	A0A2R8RK22	A0A2R8RK22|A0JMP4	atp2a1l	K365k	TGTLTTNQMCVTkMFVIDR	0	0.481175	0.32182	0.536687	-0.128283	0.693871	0.90001	1.22744	0.000476902	0.00628797	0.416812	0.16828	0.398604	-0.013	-0.5896	-0.6949	-1.4062	0.4948	0.0134	0.4508	NA	-1.1571	NA	NA	0.0483	0.7587	0.4973	0.4875
A0A2R8RK22_K397k_1_1_397_397	A0A2R8RK22	A0A2R8RK22|A0JMP4	atp2a1l	K397k	YTPEGEVTkLGAK	0	0.0303	0.8883	0.948385	-0.591067	0.0208517	0.179747	1.22744	0.000476902	0.00628797	0.416812	0.16828	0.398604	0.226	0.1349	-0.0622	-0.1466	0.1448	-0.3229	0.1686	-0.0363	0.1803	0.3328	-0.4459	0.6075	0.4079	0.593	0.7432
A0A2R8RK22_K456k_1_1_456_456	A0A2R8RK22	A0A2R8RK22|A0JMP4	atp2a1l	K456k	MNVFkSNVGNLSK	0	0.060725	0.82688	0.914748	-0.144058	0.632037	0.876979	1.22744	0.000476902	0.00628797	0.416812	0.16828	0.398604	0.4272	0.6065	0.1575	0.3476	0.4155	-0.2002	0.1512	0.5707	0.6574	0.3058	-0.238	0.8581	0.0779	0.4395	-0.3106
A0A2R8RK22_K464k_1_1_464_464	A0A2R8RK22	A0A2R8RK22|A0JMP4	atp2a1l	K464k	SNVGNLSkVER	0	-0.617875	0.0099706	0.0768439	-0.19725	0.397578	0.729636	1.22744	0.000476902	0.00628797	0.416812	0.16828	0.398604	-0.119	0.1828	-0.3309	0.1477	0.2134	-0.1753	-0.1368	0.8001	0.4508	0.3451	0.7561	0.2533	0.4395	0.1313	-0.1667
A0A2R8RK22_K476k_1_1_476_476	A0A2R8RK22	A0A2R8RK22|A0JMP4	atp2a1l	K476k	ANACCSVVkQLMK	0	-0.01195	0.964433	0.984085	0.0002	0.999449	0.999832	1.22744	0.000476902	0.00628797	0.416812	0.16828	0.398604	0.3639	-0.2371	-0.2242	-0.6876	0.3535	0.1039	0.6736	0.0698	-0.0247	-0.4397	-0.3426	0.8284	0.5765	-0.0587	0.161
A0A2R8RK22_K492k_1_1_492_492	A0A2R8RK22	A0A2R8RK22|A0JMP4	atp2a1l	K492k	DRkSMSVYCTPVKGDAGSK	0	0.346925	0.223608	0.433412	0.310517	0.309483	0.654454	1.22744	0.000476902	0.00628797	0.416812	0.16828	0.398604	0.8384	0.9324	0.8445	0.3166	0.3983	0.1061	0.1342	-0.1719	0.887	0.8711	-0.042	0.2619	-0.1981	-0.0071	-0.4473
A0A2R8RK22_K502k_1_1_502_502	A0A2R8RK22	A0A2R8RK22|A0JMP4	atp2a1l	K502k	SMSVYCTPVkGDAGSK	0	0.131725	0.67027	0.81387	-0.0669333	0.840868	0.956096	1.22744	0.000476902	0.00628797	0.416812	0.16828	0.398604	0.1458	0.2048	-0.1815	-0.2466	0.7429	-0.1016	0.4482	-0.139	0.346	-0.472	-0.3394	1.1232	0.4127	0.5633	-0.3788
A0A2R8RK22_K508k_1_1_508_508	A0A2R8RK22	A0A2R8RK22|A0JMP4	atp2a1l	K508k	SMSVYCTPVKGDAGSkMFVK	0	0.47595	0.19285	0.396526	0.0174833	0.963633	0.991969	1.22744	0.000476902	0.00628797	0.416812	0.16828	0.398604	0.386	0.5656	0.2044	0.0989	0.7549	-0.6519	0.4068	-0.5805	0.5584	0.097	-0.7238	0.7467	-0.1034	0.3072	-0.3407
A0A2R8RK22_K512k_1_1_512_512	A0A2R8RK22	A0A2R8QJH4|F1Q4P9|A9C3Q4|A0A0R4IQS8|A0A0R4IVG9|A9C3Q5|A0A2R8RK22|Q6ZM60	atp2a1l	K512k	MFVkGAPEGVIDR	0	-0.289175	0.23978	0.453751	0.06895	0.790694	0.940882	1.22744	0.000476902	0.00628797	0.416812	0.16828	0.398604	0.0559	-0.2211	-0.0299	0.1856	0.3828	0.0019	0.089	0.6984	0.5468	0.2531	-0.3511	0.3653	0.0747	0.1104	-0.1946
A0A2R8RK22_K539k_1_1_539_539	A0A2R8RK22	A0A2R8RK22|A0JMP4	atp2a1l	K539k	VGSTRVPLTGAVkDK	0	-0.07455	0.845728	0.923931	0.173575	0.675629	0.894669	1.22744	0.000476902	0.00628797	0.416812	0.16828	0.398604	0.3209	0.4192	0.0248	-0.1157	0.4041	-0.6111	0.5955	0.8723	0.5583	0.284	-0.7672	0.7351	-0.5835	0.0497	-0.3776
A0A2R8RK22_K547k_1_1_547_547	A0A2R8RK22	A0A2R8RK22|A0JMP4	atp2a1l	K547k	IMNVIkEWGTGRDTLR	0	0.747375	0.0303551	0.143641	-0.0402833	0.906654	0.981585	1.22744	0.000476902	0.00628797	0.416812	0.16828	0.398604	-0.1392	-0.3462	0.2437	0.2222	0.7813	-0.0746	0.582	-1.1131	0.2809	-1.1317	-1.0451	0.7717	0.327	0.5237	0.257
A0A2R8RK22_K569k_1_1_569_569	A0A2R8RK22	A0A2R8RK22|A0JMP4	atp2a1l	K569k	DSPLkVEEMNLEDSTK	0	0.253725	0.33349	0.549866	-0.5267	0.0739446	0.346321	1.22744	0.000476902	0.00628797	0.416812	0.16828	0.398604	0.1535	0.2344	-0.171	-0.1219	0.41	-0.2009	0.012	-0.0184	0.0725	-0.3702	-0.6038	1.189	0.6833	0.4123	0.117
A0A2R8RK22_K626k_1_1_626_626	A0A2R8RK22	A0A0R4IVG9|A9C3Q5|A0A2R8RK22|Q6ZM60|A0A2R8QJH4|F1Q4P9|A9C3Q4|A0A0R4IQS8	atp2a1l	K626k	VIMITGDNkGTAVAICRR	0	1.10947	0.000856746	0.018222	0.290025	0.331756	0.677123	1.22744	0.000476902	0.00628797	0.416812	0.16828	0.398604	1.5102	1.3531	1.4002	1.4516	-1.0884	-0.4231	-0.1655	0.0477	-0.154	0.9737	0.4098	-1.1711	-0.7943	-0.9434	-0.4873
A0A2R8RK22_K648k_1_1_648_648	A0A2R8RK22	A0A2R8RK22|A0JMP4	atp2a1l	K648k	IGIFSEDEDVTGkAYTGR	0	-1.04348	0.00881227	0.0711456	-0.941242	0.00560093	0.0866306	1.22744	0.000476902	0.00628797	0.416812	0.16828	0.398604	-0.9707	NA	-0.4424	-0.2208	-0.2582	-0.7626	-0.3198	0.4809	0.5168	NA	NA	0.777	0.8791	0.0928	0.2286
A0A2R8RK22_K683k_1_1_683_683	A0A2R8RK22	A0A2R8RK22|A0JMP4	atp2a1l	K683k	SkIVEFLQGYDEITAMTGDGVNDAPALK	0	-0.163625	0.802279	0.898947	-0.919925	0.173229	0.510673	1.22744	0.000476902	0.00628797	0.416812	0.16828	0.398604	0.0923	-0.9603	0.2072	-0.1989	-0.4706	-0.9668	-0.497	-0.2496	-0.3301	0.4258	NA	-1.7906	-0.223	1.7584	1.3557
A0A2R8RK94_K4k_1_1_4_4	A0A2R8RK94	A0A2R8RK94|A0A2R8QFW2|A0A2R8Q4N6|F1QYK8	LOC100005129	K4k	SGkTWVLLVAGSK	0	NA	NA	NA	NA	NA	NA	-0.857375	0.370011	0.504973	2.10778	0.0546537	0.209528	NA	NA	NA	NA	NA	-1.4429	NA	NA	NA	NA	NA	NA	NA	NA	NA
A0A2R8RK94_K73k_1_1_73_73	A0A2R8RK94	A0A2R8RK94|A0A2R8QFW2|A0A2R8Q4N6	LOC100005129	K73k	SVVDQTNVYkSVPLDYTGNK	0	-0.420567	0.596512	0.760735	0.297933	0.687768	0.89957	-0.857375	0.370011	0.504973	2.10778	0.0546537	0.209528	-0.8742	-0.9256	-0.9725	NA	-0.9929	1.8075	-2.358	-0.7751	-1.1695	0.434	NA	-1.303	-0.1803	-0.9259	-0.8404
A0A2R8RK94_K87k_1_1_87_87	A0A2R8RK94	A0A2R8RK94	LOC100005129	K87k	SkNFLAVLR	0	NA	NA	NA	0.5783	0.38266	0.717402	-0.857375	0.370011	0.504973	2.10778	0.0546537	0.209528	NA	NA	NA	NA	NA	-0.6526	NA	NA	NA	NA	NA	NA	-1.2309	NA	NA
A0A2R8RKP9_K634k_1_1_634_634	A0A2R8RKP9	A0A2R8RKP9|A2CER9	A0A2R8RKP9_K634k_1_1_634_634	K634k	RQDSkSALFLLEHQADINVR	0	-0.171975	0.772456	0.881661	-0.308583	0.558328	0.830287	0.578365	0.0555246	0.134867	0.988197	0.00551342	0.0495373	-0.2782	-0.395	2.1518	-0.0461	-0.8616	-0.4172	-0.3515	NA	1.0426	0.0176	NA	-0.3575	0.0353	-0.1167	-0.5005
A0A2R8RL78_K141k_1_1_141_141	A0A2R8RL78	A7MBL8|A0A2R8RL78|A0A2R8RQU7|A0A0R4IJB4|A0A2R8QG56|Q08BD6	A0A2R8RL78_K141k_1_1_141_141	K141k	kQADIELK	0	NA	NA	NA	-0.57285	0.300679	0.648235	-0.0486553	0.725467	0.808172	-0.181626	0.237002	0.484056	NA	NA	NA	NA	-0.4603	-0.0489	-2.0315	NA	-1.0466	NA	0.3383	0.2506	0.1445	-0.8066	-0.6847
A0A2R8RN29_K210k_1_1_210_210	A0A2R8RN29	F1QMR5|A0A0R4IW45|Q7ZW09|A0A2R8RN29|A8KC22	A0A2R8RN29_K210k_1_1_210_210	K210k	IEYAkPTR	0	-0.64805	0.255408	0.468728	0.805383	0.0504554	0.282934	0.0254914	0.785037	0.851497	0.020426	0.839538	0.929059	-0.0149	-0.4328	0.2526	-1.0983	0.4288	0.3909	0.621	NA	0.3247	NA	NA	-0.992	0.2164	-0.6609	0.1359
A0A2R8RN29_K482k_1_1_482_482	A0A2R8RN29	A0A2R8RN29	A0A2R8RN29_K482k_1_1_482_482	K482k	SPVSVkLFTGK	0	-0.427825	0.42761	0.631496	0.1087	0.828616	0.950927	0.161492	0.422147	0.554182	0.183854	0.398184	0.643301	-0.2827	-0.7988	-1.0372	0.3046	-0.1641	0.8067	0.4793	NA	-0.9672	NA	0.9158	NA	0.6527	0.3078	-0.1647
A0A2R8RN29_K487k_1_1_487_487	A0A2R8RN29	A0A2R8RN29	A0A2R8RN29_K487k_1_1_487_487	K487k	LFTGkVDR	0	-0.15075	0.514722	0.703119	0.447167	0.0867241	0.373482	0.161492	0.422147	0.554182	0.183854	0.398184	0.643301	0.5232	1.1069	0.0618	0.7402	0.27	-0.0688	0.2379	0.7626	0.5592	0.7342	0.9791	-0.4124	-0.0362	-0.3646	-0.39
A0A2R8RNP8_K703k_1_1_703_703	A0A2R8RNP8	E7FBU7|A0A2R8RNP8|E7F0E8	xpo1b	K703k	QLGSILkTNVR	0	0.06875	0.762328	0.876677	-0.0937167	0.702966	0.903242	-0.263055	0.0237569	0.0751624	-0.173655	0.141372	0.363518	0.6523	0.5602	0.227	0.3823	0.3446	0.0395	-0.1917	0.3911	0.6408	0.5309	-0.016	0.6017	0.0676	-0.1229	0.085
A0A2R8RQC2_K590k_1_1_590_590	A0A2R8RQC2	E7EYA8|A0A2R8RQC2|F1QXP8	fubp1	K590k	AWEEYYkK	0	-0.691025	0.0537778	0.201654	0.198425	0.502272	0.795457	0.0906397	0.317702	0.453186	0.249124	0.0203879	0.113634	0.1146	-0.3742	-0.3332	0.0193	-0.3817	0.3397	-0.0999	0.4533	0.642	NA	NA	0.4649	-0.5021	-0.5037	-0.442
A0A2R8RR81_K11k_1_1_11_11	A0A2R8RR81	A0A2R8RR81|Q803M1	A0A2R8RR81_K11k_1_1_11_11	K11k	AGSNSIDAVkRK	0	-0.5137	0.0316823	0.146456	0.0181917	0.939144	0.989668	0.452215	0.0734479	0.163728	0.196017	0.448182	0.686289	0.4595	0.6626	0.6477	0.4156	-0.2435	-0.1148	-0.3909	0.7015	0.8103	1.3418	1.3866	-0.2582	0.0755	-0.6197	-0.2693
A0A2R8RRA6_K440k_1_1_440_440	A0A2R8RRA6	A0A2R8RRA6|B8JL43	A0A2R8RRA6_K440k_1_1_440_440	K440k	GSGLTWNNLEGkK	0	-0.429625	0.10954	0.292206	-0.0913583	0.72182	0.909926	0.702834	0.0162515	0.0581971	-0.802049	0.0120669	0.081761	0.0471	0.2543	-0.0374	-0.4605	0.0416	-0.1237	-0.2948	0.6029	0.4617	0.0769	NA	0.4348	-0.2381	-0.025	-0.3088
A0A2R8RRA6_K533kK544k_2_0_525_544	A0A2R8RRA6	A0A2R8RRA6|B8JL43|A0A0R4IHQ0|E7FBJ1|Q6P3G0	A0A2R8RRA6_K533kK544k_2_0_525_544	K533k K544k	CLAEKAGDVAFIkHTVVGDYTDGk	2	-0.7901	0.597074	0.760893	-0.943942	0.346593	0.689753	0.702834	0.0162515	0.0581971	-0.802049	0.0120669	0.081761	-0.2327	NA	-0.1564	-2.4069	-2.0669	-0.6625	-1.0754	NA	NA	NA	-0.1419	-3.2935	-0.0382	1.0022	1.0322
A0A2R8RTK5_K31k_1_1_31_31	A0A2R8RTK5	A0A2R8QJK1|A0A2R8RTK5|A0A2R8RYQ3	A0A2R8RTK5_K31k_1_1_31_31	K31k	EAFSLFDKDGDGTITTkELGTVMR	0	-2.0852	0.00117502	0.0221351	-0.2929	0.649223	0.883905	0.359729	0.0644465	0.150431	-0.170921	0.38989	0.636196	-0.3671	1.5601	0.8205	-1.1372	-1.4015	-1.8374	NA	1.7377	2.3314	2.3717	2.7763	-1.2352	-2.4356	-0.8323	-0.8031
A0A2R8RTK5_K78k_1_1_78_78	A0A2R8RTK5	Q6PI52|A0A2R8QP29|A0A2R8RTK5	A0A2R8RTK5_K78k_1_1_78_78	K78k	MkDTDSEEEIREAFR	0	-0.125067	0.676098	0.817184	-0.12075	0.68661	0.899263	0.359729	0.0644465	0.150431	-0.170921	0.38989	0.636196	-0.7718	-0.8731	-0.8686	-0.6365	0.3262	0.208	-0.0005	-0.2303	-0.3382	-1.4188	NA	0.623	0.6065	-0.0655	0.0306
A0A2R8RTK5_K95k_1_1_95_95	A0A2R8RTK5	Q6PI52|A0A2R8QP29|A0A2R8RTK5	A0A2R8RTK5_K95k_1_1_95_95	K95k	VFDkDGNGYISAAELR	0	-0.04505	0.896548	0.951125	-0.18385	0.624555	0.872131	0.359729	0.0644465	0.150431	-0.170921	0.38989	0.636196	-0.3948	-0.5752	-0.3131	-0.5562	0.2661	0.1985	0.3232	-0.3415	0.255	0.0441	-1.6167	-0.0937	0.6963	0.2562	0.927
A0A2R8RUC9_K171k_1_1_171_171	A0A2R8RUC9	F1QFG2|A0A2R8RUC9	papss2a	K171k	AGQIkGFTGIDSEYEHPEAPELVLR	0	-1.66005	0.0112676	0.0810444	-0.0703667	0.911328	0.983728	0.540507	0.376737	0.510527	0.359819	0.582247	0.787686	-0.7385	0.3977	-0.2716	-1.6815	0.6635	0.4569	-1.2067	0.852	0.8511	2.5954	0.0478	0.8911	-0.2567	-0.707	0.239
A0A2R8RUW2_K213k_1_1_213_213	A0A2R8RUW2	A0A2R8RUW2	copb2	K213k	LVkIWDYQNK	0	NA	NA	NA	1.0619	0.104041	0.403268	-0.214669	0.0751937	0.166295	-0.0804355	0.513674	0.737029	NA	NA	NA	NA	-0.1819	0.6413	NA	NA	-1.0022	NA	NA	-0.0883	-0.5432	NA	-1.8651
A0A2R8RVC8_K461kK466kK480k_3_0_461_466	A0A2R8RVC8	A0A2R8RVC8	A0A2R8RVC8_K461kK466kK480k_3_0_461_466	K461k K466k K480k	GEATkNVLKkICSPLNRNWEGEFk	3	NA	NA	NA	-2.75055	0.00242118	0.0525885	1.3377	1.80523e-07	7.41231e-05	0.275093	0.0766878	0.25634	NA	NA	NA	NA	NA	-2.5732	NA	NA	NA	NA	NA	NA	NA	0.411	-0.0563
A0A2R8RVZ9_K135k_1_1_135_135	A0A2R8RVZ9	F8W4F0|A0A2R8RVZ9|A9JRP8	A0A2R8RVZ9_K135k_1_1_135_135	K135k	ENDWWLSkHIK	0	0.162125	0.561405	0.736868	0.525167	0.0950596	0.389912	0.259815	0.0700236	0.15882	-0.13988	0.34275	0.594242	0.2337	0.228	0.3669	0.6065	0.4693	0.3327	0.2953	0.2645	0.3887	0.3534	-0.22	-0.9786	0.4183	-0.3116	0.2343
A0A2R8RVZ9_K292k_1_1_292_292	A0A2R8RVZ9	A0A2R8RVZ9|A9JRP8	A0A2R8RVZ9_K292k_1_1_292_292	K292k	QSSkGNMSAMQHFR	0	-0.33375	0.136681	0.327109	0.171242	0.466695	0.772664	0.259815	0.0700236	0.15882	-0.13988	0.34275	0.594242	-0.3863	0.3013	-0.2722	0.108	0.3576	0.3473	0.0087	0.2542	0.6508	0.0834	0.0974	0.2261	-0.0234	-0.0394	0.1032
A0A2R8RVZ9_K87k_1_1_87_87	A0A2R8RVZ9	F8W4F0|A0A2R8RVZ9|A9JRP8	A0A2R8RVZ9_K87k_1_1_87_87	K87k	DGVWkPTLVLVR	0	-0.268758	0.534347	0.71595	-0.218475	0.612625	0.863041	0.259815	0.0700236	0.15882	-0.13988	0.34275	0.594242	-0.083	-1.2408	1.031	0.2319	-0.4696	-0.1483	0.1526	0.1011	0.3002	0.3593	NA	-0.4173	-0.2277	0.2532	0.6453
A0A2R8RWG9_K17k_1_1_17_17	A0A2R8RWG9	A0A2R8RWG9	A0A2R8RWG9_K17k_1_1_17_17	K17k	GEIYYEELYPEGkHGLR	0	0.625925	0.220447	0.430023	-0.937792	0.0149716	0.154364	-0.562898	0.00122083	0.0111207	-0.802681	0.000116758	0.00493576	-0.3854	-1.3607	-1.5158	-0.7016	-0.0471	-0.7571	-0.0381	NA	-1.6168	NA	NA	1.0246	0.8126	0.56	0.2309
A0A2R8RWG9_K78k_1_1_78_78	A0A2R8RWG9	A0A2R8RWG9	A0A2R8RWG9_K78k_1_1_78_78	K78k	ILAQLTGTDFMQDPDDENMkR	0	-0.6307	0.249562	0.463228	-0.0925583	0.852959	0.959379	-0.562898	0.00122083	0.0111207	-0.802681	0.000116758	0.00493576	-0.2525	NA	-0.5904	-0.3275	-0.0699	0.0547	-0.0254	NA	-0.0705	0.3763	0.4159	-1.598	0.0044	1.1702	0.7395
A0A2R8RWH8_K135k_1_1_135_135	A0A2R8RWH8	A0A2R8RWH8|Q503Y1	gpx4b	K135k	GRGTLGNNIkWNFTK	0	-0.304225	0.292958	0.50277	0.35135	0.262067	0.612365	-0.122067	0.505109	0.629476	0.0754314	0.701279	0.860612	0.1158	0.7173	0.5177	0.5725	0.2327	-0.0158	0.5433	0.1481	0.5871	0.9659	1.4391	0.4135	-0.2463	-0.3933	-0.1657
A0A2R8RWH8_K140k_1_1_140_140	A0A2R8RWH8	A0A2R8RWH8|Q503Y1	gpx4b	K140k	WNFTkFLIDR	0	NA	NA	NA	-0.3852	0.489496	0.789153	-0.122067	0.505109	0.629476	0.0754314	0.701279	0.860612	-0.7997	NA	NA	NA	-1.5136	0.0271	0.0075	NA	NA	NA	NA	NA	0.3222	-0.9852	0.3396
A0A2R8RX09_K113k_1_1_113_113	A0A2R8RX09	A0A2R8RX09|Q0D2W2	A0A2R8RX09_K113k_1_1_113_113	K113k	YDMEAkVAK	0	-1.79613	0.00397083	0.0455503	-1.18912	0.0281069	0.212295	-1.80081	5.73729e-05	0.00193542	-1.29611	0.00180984	0.0255595	-1.5271	NA	-0.623	-1.2101	-0.7133	-0.9228	-1.1622	1.1408	1.4934	-0.606	NA	-0.6964	0.9345	0.2622	0.5251
A0A2R8RX09_K116k_1_1_116_116	A0A2R8RX09	A0A2R8RX09|Q0D2W2	A0A2R8RX09_K116k_1_1_116_116	K116k	VAkADKEIEDLK	0	0.010175	0.977608	0.990317	-0.0207083	0.957823	0.991732	-1.80081	5.73729e-05	0.00193542	-1.29611	0.00180984	0.0255595	0.7661	2.5249	1.6201	0.4184	-1.0405	-0.9887	-1.054	1.0879	1.4201	1.2817	1.4991	-0.814	-1.5235	-0.8851	-0.8055
A0A2R8RXS8_K218k_1_1_218_218	A0A2R8RXS8	A0A2R8RXS8|Q7ZVE4	snap23.1	K218k	ITDkADMNK	0	-1.0502	0.0317643	0.146456	-0.0936833	0.822247	0.949287	-0.790167	0.00137181	0.0119835	0.148582	0.491556	0.718914	-1.0128	NA	-0.6769	-1.0106	-0.3164	0.2399	-0.1114	1.0625	0.4439	-1.0561	NA	-0.0462	0.1189	-0.4278	0.4793
A0A2R8RXS8_K63k_1_1_63_63	A0A2R8RXS8	E9QI05|A0A2R8RXS8|E9QDK6|Q7ZVE4	snap23.1	K63k	ETGVkTMTMLDEQGEQLRR	0	0.251792	0.278031	0.486604	-0.247833	0.285341	0.63555	-0.790167	0.00137181	0.0119835	0.148582	0.491556	0.718914	0.1465	0.2026	0.1485	-0.1335	0.0462	0.4171	0.2815	0.2354	-0.3767	-0.341	NA	0.3663	0.6954	0.2988	0.6239
A0A2R8RXT8_K100k_1_1_100_100	A0A2R8RXT8	A0A2R8RXT8|Q68EH2	ak1	K100k	EVkQGEEFEK	0	0.675475	0.113155	0.297282	-0.121542	0.76559	0.931327	1.25198	5.26943e-06	0.000504147	0.657661	0.00315704	0.0359472	-0.6769	-0.1083	-0.7543	-0.4414	0.1493	0.1449	-0.0514	-0.7059	-0.66	-2.1462	NA	1.088	0.4141	-0.2883	-0.4039
A0A2R8RXT8_K107k_1_1_107_107	A0A2R8RXT8	A0A2R8RXT8|Q68EH2	ak1	K107k	QGEEFEkK	0	-0.11015	0.711097	0.841489	0.187258	0.561265	0.832369	1.25198	5.26943e-06	0.000504147	0.657661	0.00315704	0.0359472	0.2274	-0.1383	-0.0017	0.1251	0.6768	-0.5221	0.4028	-0.598	0.288	0.4485	0.5146	0.2114	-0.3228	0.1861	-0.0804
A0A2R8RXT8_K127k_1_1_127_127	A0A2R8RXT8	A0A2R8RXT8|Q68EH2	ak1	K127k	KIGAPALLLYIDAKGETMVkR	0	0.8803	0.13465	0.323858	0.141667	0.809887	0.947374	1.25198	5.26943e-06	0.000504147	0.657661	0.00315704	0.0359472	0.8052	0.8893	1.4075	0.7986	NA	-0.5311	-0.5811	NA	-0.9265	NA	1.1162	NA	-1.6305	-0.0987	-0.3641
A0A2R8RXT8_K147k_1_1_147_147	A0A2R8RXT8	A0A2R8RXT8|Q68EH2	ak1	K147k	RGETSGRADDNEETIkK	0	0.67235	0.00506105	0.0521672	0.0262583	0.907241	0.981713	1.25198	5.26943e-06	0.000504147	0.657661	0.00315704	0.0359472	0.6934	0.7604	0.3652	0.5557	-0.0625	0.0084	0.1469	-0.1625	0.1936	-0.2549	-0.0909	0.261	0.2057	0.0189	-0.4669
A0A2R8RXT8_K27k_1_1_27_27	A0A2R8RXT8	A0A2R8RXT8|Q68EH2	ak1	K27k	GTQCEkIVAK	0	-0.246833	0.277161	0.48658	0.612117	0.0140204	0.146934	1.25198	5.26943e-06	0.000504147	0.657661	0.00315704	0.0359472	0.2068	-0.2073	-0.3987	-0.39	0.4783	0.4781	0.6005	0.1383	-0.1346	0.1449	NA	0.1254	-0.3814	-0.0818	-0.0348
A0A2R8RXT8_K83k_1_1_83_83	A0A2R8RXT8	A0A2R8RXT8|Q68EH2	ak1	K83k	DAMIAkADVSK	0	-0.0446667	0.860856	0.93226	-0.1549	0.545737	0.823847	1.25198	5.26943e-06	0.000504147	0.657661	0.00315704	0.0359472	0.4158	0.0315	0.1013	-0.1134	-0.3125	-0.6261	0.2231	0.0665	0.3163	0.0776	NA	-0.4917	0.0688	-0.0451	0.1336
A0A2R8RZN3_K33k_1_1_33_33	A0A2R8RZN3	A0A2R8RZN3|E9QIJ1|Q803B5	A0A2R8RZN3_K33k_1_1_33_33	K33k	GVSPYHVVEECkSR	0	NA	NA	NA	0.984	0.121925	0.432045	0.166359	0.449268	0.579353	-0.0228644	0.922423	0.967911	NA	NA	NA	NA	0.0131	NA	NA	0.0905	NA	0.1367	NA	-0.9709	NA	NA	NA
A0A2R8RZN3_K38k_1_1_38_38	A0A2R8RZN3	A0A0R4IAH2|A0A2R8RZN3|E9QIJ1|Q803B5	A0A2R8RZN3_K38k_1_1_38_38	K38k	LLkAGFTELK	0	-0.8643	0.0107307	0.0790517	0.341633	0.264726	0.61506	0.166359	0.449268	0.579353	-0.0228644	0.922423	0.967911	-1.0123	-0.6037	-0.5129	-0.7695	0.3566	1.1541	-0.028	0.6478	-0.0192	-0.2095	NA	-0.0819	0.3513	0.1389	0.2021
A0A2R8RZR0_K122k_1_1_122_122	A0A2R8RZR0	A0A2R8RZR0|Q6DHD5	A0A2R8RZR0_K122k_1_1_122_122	K122k	QLESSLkR	0	-0.1047	0.686304	0.824482	-0.137683	0.623388	0.871661	0.133168	0.304561	0.439983	-0.0603303	0.661209	0.83869	0.0909	0.4026	0.3796	0.0088	0.0108	-0.0674	0.01	0.4789	0.6579	0.6703	-0.5064	0.3412	0.2639	-0.1876	0.0711
A0A2R8RZX5_K401k_1_1_401_401	A0A2R8RZX5	A0A2R8RZX5|A0A2R8Q476|F1R047	A0A2R8RZX5_K401k_1_1_401_401	K401k	FEEAIkLR	0	-0.4155	0.569907	0.742117	-1.01537	0.0362797	0.235425	0.624644	0.264895	0.397908	-0.0898573	0.879019	0.946165	NA	NA	-0.5238	NA	-0.5767	0.2432	-1.0984	NA	-0.1083	NA	NA	0.8779	0.0625	NA	0.6738
A0A2R8RZX5_K706k_1_1_706_706	A0A2R8RZX5	A0A2R8RZX5	A0A2R8RZX5_K706k_1_1_706_706	K706k	NFGTkMGAK	0	-0.213225	0.519603	0.706618	1.05031	0.00573502	0.0866306	0.624644	0.264895	0.397908	-0.0898573	0.879019	0.946165	-0.7229	-0.0049	-0.8048	-0.6227	0.7374	0.2796	1.3672	-0.6084	-0.1313	-0.2371	NA	0.2056	0.1043	-0.7083	-0.6239
A0A2R8RZX5_K710k_1_1_710_710	A0A2R8RZX5	A0A2R8RZX5|A0A2R8Q476|F1R047	A0A2R8RZX5_K710k_1_1_710_710	K710k	MGAkAVLWLTDK	0	1.43595	0.0921393	0.267035	-0.343992	0.695571	0.900378	0.624644	0.264895	0.397908	-0.0898573	0.879019	0.946165	0.9519	-0.1666	1.3926	1.3025	-1.7406	-0.2777	0.651	-1.8474	-1.3285	-0.4374	1.3499	-2.5076	0.1883	1.1906	0.6816
A0A2R8RZX5_K778k_1_1_778_778	A0A2R8RZX5	A0A2R8RZX5	A0A2R8RZX5_K778k_1_1_778_778	K778k	LRPILkILAK	0	0.6346	0.273006	0.483877	0.0644	0.916286	0.984987	0.624644	0.264895	0.397908	-0.0898573	0.879019	0.946165	0.5228	1.3806	1.2073	1.3521	0.2333	-2.293	0.5009	-0.2793	1.2274	0.0704	0.9059	-0.1858	0.1824	-0.6546	-1.678
A0A2R8S0A2_K279k_1_1_279_279	A0A2R8S0A2	A0A2R8S0A2|Q6GQM6	elavl2	K279k	FRLDNLLNMAYGVkSR	0	NA	NA	NA	-0.955475	0.224243	0.573186	-1.62378	0.0386363	0.10458	-0.461322	0.555055	0.76864	NA	NA	NA	NA	-1.0816	NA	NA	NA	-0.1411	1.7941	2.1538	0.0957	0.0112	-0.2521	-0.3593
A0A2R8S0A2_K345k_1_1_345_345	A0A2R8S0A2	A0A0R4IEW8|Q1MT20|A0A0R4IXJ1|F1QM02|A0A2R8S0A2|Q1MT19|F1R133|F1QGR7|Q7ZTS8|Q6GQM6	elavl2	K345k	VIRDFNTNkCK	0	-0.9107	0.0419934	0.175052	0.168908	0.708114	0.904177	-1.62378	0.0386363	0.10458	-0.461322	0.555055	0.76864	-0.0595	1.0328	-0.2591	0.3918	0.4435	-0.4807	-0.7028	1.2101	1.8926	1.3468	0.2993	0.3561	-0.1362	-1.1537	-0.7285
A0A2R9YJG7_K142k_1_1_142_142	A0A2R9YJG7	A0A2R9YJG7	vclb	K142k	TSQGkGVEEALK	0	-0.1247	0.58257	0.751679	-0.270083	0.27763	0.628076	-0.246079	0.35678	0.491891	0.19876	0.487512	0.716121	0.0046	0.007	0.2338	-0.0928	0.1019	0.4766	-0.1157	-0.1634	0.2997	0.1635	0.3516	0.8428	0.5758	0.0562	0.2226
A0A2R9YJG7_K620k_1_1_620_620	A0A2R9YJG7	A0A2R9YJG7	vclb	K620k	NPGNQAAFEHFETMkNQWIDNVEK	0	-0.740825	0.0255664	0.131738	0.242917	0.426694	0.745292	-0.246079	0.35678	0.491891	0.19876	0.487512	0.716121	-0.6807	-0.4919	-1.3362	-0.4893	0.7918	0.8842	0.3084	0.2654	-0.0416	-0.2499	NA	0.9983	0.546	0.0826	0.0473
A0A2R9YJG7_K705k_1_1_705_705	A0A2R9YJG7	A0A2R9YJG7	vclb	K705k	FRETVkAASDELSR	0	0.9621	0.0791623	0.245621	-0.288392	0.399581	0.729866	-0.246079	0.35678	0.491891	0.19876	0.487512	0.716121	-0.4251	NA	-0.0532	-1.394	0.3092	0.2127	-0.2614	-1.5862	NA	NA	NA	0.1165	0.7251	0.3838	0.2755
A0A2R9YJG7_K730k_1_1_730_730	A0A2R9YJG7	A0A2R9YJG7	vclb	K730k	AVAANIkDQGLQR	0	-0.27295	0.290337	0.500686	-0.10705	0.696276	0.900378	-0.246079	0.35678	0.491891	0.19876	0.487512	0.716121	-0.1346	0.3827	0.1029	0.0904	0.6098	-0.5327	-0.1857	0.6936	0.551	0.3163	-0.0277	0.1908	0.1083	-0.0787	0.063
A0A2R9YJG7_K923k_1_1_923_923	A0A2R9YJG7	F6NHA0|A0A2R9YJG7	vclb	K923k	ILSTVkATMLGR	0	-1.13135	0.251754	0.465174	1.0201	0.137919	0.462155	-0.246079	0.35678	0.491891	0.19876	0.487512	0.716121	0.6035	-0.1878	0.9953	0.5232	0.152	0.4508	0.6086	NA	NA	NA	1.6149	-2.8675	-0.1899	0.4879	0.1043
A0A2R9YJH5_K291k_1_1_291_291	A0A2R9YJH5	A0A2R9YJH5|Q7ZUU6|A0A0R4IFJ7	ckmt2a	K291k	GLkQVEHLIQER	0	-1.65718	0.000142405	0.00647534	0.572492	0.0435888	0.260662	0.613029	0.00707711	0.0337466	0.227828	0.291042	0.546006	-0.9997	-0.8519	-1.2085	NA	0.1564	0.5503	0.3777	0.9008	0.3735	NA	NA	0.0476	-0.5821	0.1004	-0.41
A0A2R9YJH5_K343k_1_1_343_343	A0A2R9YJH5	A0A2R9YJH5|Q7ZUU6|A0A0R4IFJ7	ckmt2a	K343k	FGkILDNLR	0	0.1532	0.769839	0.880452	-0.200325	0.702341	0.903242	0.613029	0.00707711	0.0337466	0.227828	0.291042	0.546006	0.6775	0.5468	0.1932	0.1121	-1.0505	-0.3893	0.6097	0.2484	0.0459	0.3933	NA	-1.7019	-0.0713	0.6408	0.8269
A0A2R9YJH5_K407k_1_1_407_407	A0A2R9YJH5	A0A2R9YJH5|Q7ZUU6|A0A0R4IFJ7	ckmt2a	K407k	GQDIkVPAPLQQFKK	0	-0.24	0.417515	0.621638	0.221683	0.486816	0.788879	0.613029	0.00707711	0.0337466	0.227828	0.291042	0.546006	0.5156	0.67	0.1341	0.1936	-0.5304	0.1712	0.5636	1.2154	0.887	0.3965	-0.0256	-0.1666	-0.3746	0.0128	-0.0858
A0A2R9YJH5_K416k_1_1_416_416	A0A2R9YJH5	A0A2R9YJH5|Q7ZUU6|A0A0R4IFJ7	ckmt2a	K416k	VPAPLQQFkK	0	0.0289	0.912848	0.960433	-0.020525	0.942624	0.989668	0.613029	0.00707711	0.0337466	0.227828	0.291042	0.546006	0.0594	-0.1007	-0.0289	-0.0146	0.1455	-0.0716	0.7646	0.5032	0.3169	-0.6148	-0.4057	0.1438	0.3128	0.3053	0.4382
A0A2R9YJJ0_K378k_1_0_378_378	A0A2R9YJJ0	A0A2R9YJJ0|A5PF33|Q503Q8	tbl1xr1a	K378k	IWSMkQDTCVHDLQAHSK	1	-0.42375	0.124272	0.310561	0.296467	0.308311	0.653198	-0.497135	0.0001147	0.0027659	-0.0623192	0.537195	0.755456	0.2215	-0.2303	0.5269	-0.0207	0.3942	0.2807	0.4992	-0.1029	0.4028	1.1207	0.7718	0.4336	0.0177	-0.1056	0.0339
A0A2R9YJL1_K120k_1_1_120_120	A0A2R9YJL1	A0A2R9YJL1|Q801E6	mdh1aa	K120k	DLLkANVAIFK	0	1.12923	0.0292879	0.141425	-1.0667	0.0497263	0.282055	0.478923	0.0152749	0.0558672	0.231293	0.233315	0.479288	0.713	-0.0819	0.1093	0.156	-1.7795	0.235	-0.0379	-1.5913	NA	-0.2496	-0.8745	NA	1.0228	0.1087	0.4862
A0A2R9YJL1_K222k_1_1_222_222	A0A2R9YJL1	A0A2R9YJL1	mdh1aa	K222k	NGkEIAAFDAVNDESWLK	0	0.87635	0.149538	0.346189	0.52875	0.409531	0.734664	0.478923	0.0152749	0.0558672	0.231293	0.233315	0.479288	0.5307	-0.2442	-0.2091	0.1223	0.3894	0.4378	0.6128	-0.3042	-0.5937	-0.0664	-2.3414	-2.1111	0.7133	0.4709	0.7319
A0A2R9YJL1_K253k_1_1_253_253	A0A2R9YJL1	A0A2R9YJL1|Q801E6	mdh1aa	K253k	GAAVIkAR	0	0.448775	0.0805332	0.24716	0.593108	0.03669	0.237152	0.478923	0.0152749	0.0558672	0.231293	0.233315	0.479288	0.525	0.9357	0.2294	0.6249	0.6871	0.2242	0.0992	0.4164	0.2778	-0.0116	-0.1627	-0.7447	-0.1031	0.057	-0.2343
A0A2R9YJL1_K315k_1_1_315_315	A0A2R9YJL1	A0A2R9YJL1|Q801E6	mdh1aa	K315k	SWkVVDGLSINDFSR	0	0.0095	0.978205	0.990446	-0.306592	0.419534	0.740499	0.478923	0.0152749	0.0558672	0.231293	0.233315	0.479288	0.4465	0.5766	0.7284	-0.2763	-0.2675	-0.0569	0.1106	-0.6048	0.481	0.7931	0.7679	-0.4623	0.1133	0.7186	0.5717
A0A2R9YJL1_K329k_1_1_329_329	A0A2R9YJL1	A0A2R9YJL1|Q801E6	mdh1aa	K329k	GkMDATAAELVEER	0	-0.65755	0.0657957	0.225687	-0.394958	0.287258	0.637042	0.478923	0.0152749	0.0558672	0.231293	0.233315	0.479288	0.1022	0.0888	0.6701	-0.4568	-0.2141	-0.3028	-1.0351	1.6244	0.818	0.6023	-0.0102	0.1967	-0.3635	-0.0452	-0.2775
A0A5H1ZRJ2_K679k_1_1_679_679	A0A5H1ZRJ2	F1QGH7|A0A5H1ZRJ2|E7FC99	A0A5H1ZRJ2_K679k_1_1_679_679	K679k	MSEDKPQDYkK	0	-0.44815	0.202894	0.408265	-0.0575167	0.876416	0.967354	0.144937	0.18403	0.307137	-0.306815	0.0166625	0.101301	-0.0829	0.1281	-0.2396	0.2164	-0.3408	0.4318	-0.804	0.7128	0.8977	0.6168	-0.4127	0.1286	0.3558	-0.6929	-0.5121
A0AUR5_K423k_1_1_423_423	A0AUR5	A0AUR5	mindy3	K423k	TDDTPVkR	0	-0.40555	0.37131	0.582436	0.194742	0.622581	0.871214	0.989399	6.48847e-05	0.00202709	0.730909	0.00164211	0.023931	-0.77	-0.1745	-0.1205	-0.2616	0.6374	0.2473	-0.3586	-0.7589	0.9067	NA	NA	0.0612	0.3745	-0.5738	0.0606
A0AUS0_K195k_1_1_195_195	A0AUS0	A0AUS0	wdsub1	K195k	MMkGTDGCVQFR	0	0.291325	0.326468	0.541967	0.017825	0.954938	0.991112	-0.0144629	0.905966	0.939136	-0.274221	0.0546219	0.209528	0.1001	0.5945	0.0898	0.2022	0.2461	-0.2247	0.2657	0.2452	0.3006	0.2546	-0.9791	0.498	-0.2017	-0.0936	0.1088
A0AUS0_K319k_1_1_319_319	A0AUS0	A0AUS0	wdsub1	K319k	MEEGSSAQGkSLPDEK	0	-0.500467	0.0688074	0.229706	-0.0395667	0.878432	0.967557	-0.0144629	0.905966	0.939136	-0.274221	0.0546219	0.209528	-1.0577	-0.3202	-0.7116	-0.8497	0.2311	0.0321	0.2934	0.1949	-0.6774	-0.2205	NA	0.5066	0.2064	0.1966	-0.0092
A0JMN8_K679k_1_1_679_679	A0JMN8	A0JMN8	osbpl9	K679k	DVTMNLkLK	0	-0.238033	0.628236	0.783348	0.685142	0.150885	0.480248	0.0707316	0.586311	0.700953	0.0381562	0.784847	0.905259	NA	0.0475	-0.53	0.5495	0.7251	0.3041	0.138	-0.0115	-0.2663	1.0589	NA	0.5281	0.0057	-1.4283	-0.2898
A1A5V7_K81kK87k_2_2_81_87	A1A5V7	A1A5V7	A1A5V7_K81kK87k_2_2_81_87	K81k M83m K87k	IPkDmEDAkALGTVLSK	0	-3.0906	0.000768848	0.017184	0.061275	0.934952	0.989668	0.157838	0.403652	0.536567	0.114951	0.570444	0.781115	-1.6288	0.1331	NA	-1.2097	-0.5297	NA	-3.1289	2.419	2.2535	1.8939	NA	-0.4984	-2.053	-2.6769	-2.334
A1A5X4_K293k_1_1_293_293	A1A5X4	A0A0R4IT10|A1A5X4	add1	K293k	NLGPkSK	0	0.2199	0.475128	0.673401	0.65925	0.0600493	0.311618	0.378167	0.000955556	0.009564	0.149422	0.143257	0.365404	0.2533	0.4906	0.4662	0.9337	0.2783	0.364	0.201	-0.2721	0.0546	0.4723	1.0094	-1.0686	-0.4735	0.1415	-0.112
A1L1T1_K466k_1_1_466_466	A1L1T1	A1L1T1	niban2a	K466k	EDLCkNIQR	0	-0.47705	0.0859914	0.257129	-0.661758	0.0225496	0.189145	0.247374	0.0478931	0.121788	0.328496	0.018778	0.107979	-0.3266	-0.1692	0.0849	-0.5925	0.0217	-0.5589	-0.5621	0.2717	0.267	0.1399	NA	0.5862	0.3059	-0.235	0.5242
A1L1U1_K88k_1_1_88_88	A1L1U1	A1L1U1	strn	K88k	GQENLkK	0	1.92715	0.00548195	0.0546785	0.497117	0.226638	0.576148	-0.215894	0.130844	0.243561	-0.356975	0.0283257	0.138033	0.889	0.8162	-0.1265	0.6215	-0.1687	0.475	-0.1867	NA	-1.3771	NA	NA	-1.1903	-0.4807	0.5052	-0.6632
A1L223_K170k_1_1_170_170	A1L223	E9QIB1|E9QFQ7|A1L223	cbx5	K170k	WKDSDEADLVLAkEANHK	0	-0.0043	0.990726	0.99374	-0.257267	0.522565	0.809531	0.31019	0.0676862	0.155475	0.267463	0.135495	0.354067	-0.1831	-0.5159	0.0712	0.1528	-0.524	0.7239	-0.2022	-0.9719	-0.1369	0.1903	0.4607	-0.4306	0.816	-0.0075	0.6481
A2AWE1_K114k_1_1_114_114	A2AWE1	A2AWE1	prdx1	K114k	SISkDYGVLK	0	0.5519	0.324923	0.540536	-0.0195333	0.973838	0.993504	-0.617398	0.010597	0.0435556	-0.196576	0.394421	0.639408	-0.8267	-1.0463	-1.3295	-0.9749	0.9908	-0.0199	0.3901	-0.5133	-0.857	-1.1012	-3.9135	0.6542	0.3455	0.1975	0.6956
A2BG14_K208k_1_1_208_208	A2BG14	A2BG14	gda	K208k	EYPNVkPVVTPR	0	-0.981475	0.00575091	0.056076	-0.124433	0.711166	0.905502	-0.726763	0.117984	0.226402	-0.525018	0.28292	0.537163	0.2231	-0.2078	-0.2621	-0.2451	0.4779	-0.9081	-0.1204	1.5049	0.3401	0.5249	1.0641	-0.3474	-0.0444	0.0134	0.142
A2BG43_K57k_1_1_57_57	A2BG43	A2BG43	gltp	K57k	IkAVYDSNPTR	0	-0.481175	0.0522344	0.19793	-0.323342	0.209461	0.554681	-0.428426	0.0407971	0.10853	0.0618248	0.76608	0.895195	0.4939	0.3491	0.2656	0.1749	-0.0289	-0.0238	-0.4464	0.6367	0.8142	0.6699	1.0874	0.4132	-0.4856	0.4043	0.296
A2BG46_K106k_1_1_106_106	A2BG46	A2BG46	ankrd13a	K106k	DYLkASTALGGVPELLCK	0	-0.0742667	0.894824	0.950826	-0.364967	0.368099	0.704744	-0.190643	0.0526684	0.129919	-0.0688043	0.488387	0.716866	0.0187	NA	-0.1533	0.1377	-1.0079	0.6917	-0.3224	NA	NA	0.0753	NA	NA	0.1068	0.3269	0.0226
A2BG46_K244k_1_1_244_244	A2BG46	A2BG46	ankrd13a	K244k	RLTTSIVNTYLDTkDIAFER	0	-0.102675	0.830425	0.916391	0.152767	0.642121	0.879376	-0.190643	0.0526684	0.129919	-0.0688043	0.488387	0.716866	-0.2936	0.2877	0.4789	-0.0805	-0.3609	0.8293	0.1906	0.2008	NA	NA	NA	-0.2298	-0.2169	0.368	0.3463
A2BG46_K264k_1_1_264_264	A2BG46	A2BG46	ankrd13a	K264k	AkSGIWGWR	0	-0.026675	0.918296	0.964179	0.5053	0.0871778	0.374436	-0.190643	0.0526684	0.129919	-0.0688043	0.488387	0.716866	0.2029	0.0247	0.0003	0.3228	0.1393	1.1214	0.4079	-0.007	-0.0268	-0.1489	0.8401	0.0064	-0.1087	0.1958	0.1101
A2BGW3_K317k_1_1_317_317	A2BGW3	A2BGW3	camk2b1	K317k	NFSAAkTLLNK	0	-0.154825	0.590515	0.75595	-0.0733083	0.812794	0.94777	0.130097	0.377392	0.511087	-0.186064	0.247851	0.496092	-0.3768	-0.0684	0.3744	-0.0412	0.402	0.5057	-0.4575	0.5361	-0.3023	0.0102	0.2633	0.7993	0.0824	-0.0336	0.0454
A2BGX6_K1024k_1_1_1024_1024	A2BGX6	E7FAD0|B8A561|A0A2R8Q2N5|A2BGX6|B8A569	myhc4	K1024k	VNTLTkSK	0	2.4289	0.00526311	0.0536621	1.05458	0.123737	0.43552	-0.628766	0.00106869	0.0102227	-0.961182	5.15683e-05	0.0029459	0.4246	-0.3206	0.3315	0.5169	0.2974	-1.4013	1.7394	-3.3053	-1.0763	NA	NA	-1.1014	-1.2156	-0.1841	-0.8699
A2BGX6_K1028k_1_1_1028_1028	A2BGX6	B8A561|A0A2R8Q2N5|A2BGX6|B8A569|F1R6C7|Q6IQX1	myhc4	K1028k	TkLEQQVDDLEGSLEQEK	0	0.884075	0.0118346	0.0839028	0.404683	0.2439	0.593399	-0.628766	0.00106869	0.0102227	-0.961182	5.15683e-05	0.0029459	0.444	0.5417	0.3734	0.8327	0.2859	-0.1307	0.4098	-0.302	-0.1576	-0.5581	-0.3268	0.6881	0.0092	-0.3991	-1.1636
A2BGX6_K1062k_1_1_1062_1062	A2BGX6	A0A2R8Q2N5|A2BGX6|B8A569|F1R6C7	myhc4	K1062k	RKLEGDLkLAQESIMDLENDK	0	2.87715	0.0234642	0.125269	0.754633	0.515963	0.803575	-0.628766	0.00106869	0.0102227	-0.961182	5.15683e-05	0.0029459	0.9526	-0.1195	0.322	1.5107	-2.1341	0.6341	0.9841	-1.341	-3.6057	-1.6854	NA	-4.748	0.78	0.4063	-0.1447
A2BGX6_K1075k_1_1_1075_1075	A2BGX6	A0A2R8Q2N5|A2BGX6|B8A569|F1R6C7	myhc4	K1075k	LAQESIMDLENDkQQSEEK	0	0.014125	0.950604	0.976776	0.0992833	0.687648	0.89957	-0.628766	0.00106869	0.0102227	-0.961182	5.15683e-05	0.0029459	0.4265	0.2902	0.6073	-0.3108	0.1388	0.1809	0.1904	0.2886	0.4847	0.0146	0.1688	0.1751	-0.3165	0.1531	0.2713
A2BGX6_K108k_1_1_108_108	A2BGX6	F1R6C7|Q6IQX1|B8A568|A0A2R8QLD9|B8A561|A0A2R8Q2N5|A2BGX6|B8A569	myhc4	K108k	IEDMAMMTHLNEPSVLYNLkER	0	1.53062	0.105959	0.288092	-0.457517	0.64099	0.878725	-0.628766	0.00106869	0.0102227	-0.961182	5.15683e-05	0.0029459	-0.5824	-0.7238	-0.4188	-0.3167	-2.2519	0.6957	0.1301	-1.7141	-3.0838	-1.1147	-2.2516	-3.3947	1.7829	0.4455	1.0949
A2BGX6_K1108k_1_1_1108_1108	A2BGX6	E7FAD0|B8A561|A0A2R8Q2N5|A2BGX6|B8A569|F1R6C7|Q6IQX1	myhc4	K1108k	IEDEQSLGAQLQkK	0	1.4032	0.000915044	0.0189524	0.5462	0.125893	0.439421	-0.628766	0.00106869	0.0102227	-0.961182	5.15683e-05	0.0029459	0.4524	0.1675	0.1685	1.1472	0.2577	0.2342	0.5437	-0.532	-0.8618	-1.3641	NA	0.5229	-0.1116	-0.3928	-0.8225
A2BGX6_K1175k_1_1_1175_1175	A2BGX6	A0A2R8Q4Q8|E7FAD0|A0A2R8QM44|A0A0G2L365|A0A2R8Q9I2|A0A2R8QGS1|A0A2R8Q9M0|A0A0G2L6C1|A0A2R8QHZ3|A0A2R8Q8V2|A0A2R8QK05|A0A0N4STT5|A0A0G2L354|A0A2R8Q7G9|B8A561|F1R6C7|B6IDE1|Q6IQX1|B8A568|A0A0N4SU68|A0A2R8Q9D2|A0A2R8Q2N5|A2BGX6|F1QZW1|F1QVX3|B8A569|A0A0R4INI3	myhc4	K1175k	EAEFQkLR	0	-0.26995	0.23159	0.444502	0.224267	0.352804	0.697292	-0.628766	0.00106869	0.0102227	-0.961182	5.15683e-05	0.0029459	0.1626	-0.0856	0.1096	0.1218	0.5853	0.0755	0.5829	0.3722	0.6872	0.4218	-0.093	0.5219	-0.0415	0.198	0.0828
A2BGX6_K1197k_1_1_1197_1197	A2BGX6	B8A561|A0A2R8Q2N5|A2BGX6|F1QZW1	myhc4	K1197k	kQADSVAELGEQIDNLQR	0	-1.61462	0.00010714	0.00580613	-0.0572167	0.866963	0.965545	-0.628766	0.00106869	0.0102227	-0.961182	5.15683e-05	0.0029459	-0.0419	0.8186	0.3187	-0.5451	-0.1929	-0.8895	-0.8639	1.6195	2.264	1.619	1.5063	-0.1195	-1.1033	-0.7307	-0.4127
A2BGX6_K1227k_1_1_1227_1227	A2BGX6	E7FAD0|B8A561|A0A2R8Q2N5|A2BGX6|B8A569|F1R6C7|Q6IQX1|B8A568	myhc4	K1227k	SEYkMEIDDLSSNMEAVAK	0	1.04303	0.000439359	0.0125043	-0.0902667	0.724908	0.911188	-0.628766	0.00106869	0.0102227	-0.961182	5.15683e-05	0.0029459	0.4057	0.4485	0.2548	0.8743	0.2033	-0.0454	0.3636	-0.268	-0.4028	-0.5246	-0.9934	0.6608	0.377	0.1302	-0.1116
A2BGX6_K1242k_1_1_1242_1242	A2BGX6	E7FAD0|B8A561|A0A2R8Q2N5|A2BGX6|B8A569|F1R6C7|Q6IQX1|B8A568	myhc4	K1242k	MEIDDLSSNMEAVAkAK	0	1.8333	0.000748458	0.0170047	0.174908	0.715144	0.906947	-0.628766	0.00106869	0.0102227	-0.961182	5.15683e-05	0.0029459	0.0923	-0.3324	-0.0096	0.68	0.5679	0.4228	0.6009	-0.9523	-1.4079	-1.0599	-3.4828	0.3069	0.5933	0.5304	-0.0081
A2BGX6_K1244k_1_1_1244_1244	A2BGX6	A0A2R8Q4Q8|E7FAD0|A0A0G2L6C1|A0A2R8QHZ3|A0A2R8QK05|A0A0N4STT5|A0A0G2L354|B8A561|A0A0N4SU68|A0A2R8Q9D2|A0A2R8Q2N5|A2BGX6|B8A569	myhc4	K1244k	AkANLEK	0	0.803825	0.198218	0.40337	0.961625	0.0887723	0.378569	-0.628766	0.00106869	0.0102227	-0.961182	5.15683e-05	0.0029459	-0.1182	-0.1017	0.0532	-0.7634	0.1771	-0.3848	1.3255	-0.5292	-1.5435	NA	NA	-1.327	-1.5648	0.3842	0.1515
A2BGX6_K1249k_1_1_1249_1249	A2BGX6	A0A2R8QGS1|A0A0N4STT5|A0A0G2L354|B8A561|A0A0N4SU68|A0A2R8Q9D2|A0A2R8Q2N5|A2BGX6|B8A568	myhc4	K1249k	ANLEkMCR	0	1.57475	0.00149172	0.0257696	0.021525	0.957905	0.991732	-0.628766	0.00106869	0.0102227	-0.961182	5.15683e-05	0.0029459	0.9371	-0.1825	1.0641	0.9583	0.1384	-0.514	0.4806	-1.209	0.0613	-1.4938	NA	-0.2302	-0.1939	0.0976	0.3804
A2BGX6_K1262k_1_1_1262_1262	A2BGX6	A2BGX6|Q6IQX1	myhc4	K1262k	TVEDQLSEIkSKNDENLR	0	1.23175	0.000121562	0.00630293	-0.44765	0.104869	0.404302	-0.628766	0.00106869	0.0102227	-0.961182	5.15683e-05	0.0029459	0.2409	0.2355	-0.3951	0.4748	0.4987	-0.3317	-0.0011	-1.1233	-0.9899	-1.1054	-1.1523	0.8918	0.4136	0.4932	0.2132
A2BGX6_K1264k_1_1_1264_1264	A2BGX6	B8A569|A2BGX6|Q6IQX1|B8A568	myhc4	K1264k	SkNDENLRQINDLSAQR	0	4.10527	0.000791695	0.0174969	2.20818	0.0546898	0.296201	-0.628766	0.00106869	0.0102227	-0.961182	5.15683e-05	0.0029459	1.529	1.7586	1.275	1.7259	-0.3419	0.4116	0.7412	-2.6268	-4.5089	-1.634	-1.3629	-5.9518	-0.6718	-0.5506	-0.5773
A2BGX6_K1296k_1_1_1296_1296	A2BGX6	A2BGX6|B8A569|F1R6C7|Q6IQX1	myhc4	K1296k	LQTENGEFGRQLEEkEALVSQLTR	0	0.9452	0.0900377	0.264064	0.167233	0.784371	0.939721	-0.628766	0.00106869	0.0102227	-0.961182	5.15683e-05	0.0029459	2.2836	1.7365	1.9369	1.449	-3.9148	-1.5089	-1.3412	0.2413	0.1325	1.5104	1.741	-2.6776	NA	-2.0084	-2.5806
A2BGX6_K12k_1_1_12_12	A2BGX6	A0A2R8Q2N5|A2BGX6|B8A569|F1R6C7	myhc4	K12k	STDAEMAVYGkAAIYLRKPEK	0	1.6211	0.00341931	0.0416209	0.815758	0.126901	0.4411	-0.628766	0.00106869	0.0102227	-0.961182	5.15683e-05	0.0029459	2.1795	1.2294	1.9675	2.2059	-1.2881	-1.2271	-0.7229	-0.6492	-0.4176	0.1614	2.0033	-2.4801	-2.0426	-1.7447	-1.3131
A2BGX6_K1307k_1_1_1307_1307	A2BGX6	B8A561|A0A2R8Q2N5|A2BGX6|B8A569|F1R6C7|Q6IQX1|B8A568	myhc4	K1307k	GkQAFTQQIEELK	0	0.4548	0.0500304	0.194995	0.446958	0.0715629	0.341214	-0.628766	0.00106869	0.0102227	-0.961182	5.15683e-05	0.0029459	0.8729	1.0284	0.6141	0.9879	0.1905	0.136	0.2907	0.1683	0.2329	0.6364	0.6465	0.1996	-0.3509	-0.1992	-0.6144
A2BGX6_K1326k_1_1_1326_1326	A2BGX6	B8A561|A2BGX6|B8A568|A0A2R8Q4Q8|A0A0G2L6C1|A0A2R8QHZ3|A0A0G2L354|A0A2R8Q7G9|A0A0N4SU68|A0A2R8Q9D2|A0A2R8Q8V2|A0A2R8QK05|A0A0G2L365|B8JLS3|A0A2R8Q9I2|A0A2R8QGS1|A0A2R8Q9M0|A0A0N4STT5|A0A0R4INI3|B6IDE1	myhc4	K1326k	QIEEEVkAK	0	1.68413	7.52796e-05	0.00451221	0.303883	0.383022	0.71776	-0.628766	0.00106869	0.0102227	-0.961182	5.15683e-05	0.0029459	0.0785	0.1787	-0.1719	0.685	0.6567	0.165	0.487	-0.9182	-0.9556	-1.7521	-2.3403	0.5301	-0.0181	0.2473	-0.2299
A2BGX6_K1328k_1_1_1328_1328	A2BGX6	A0A2R8Q4Q8|E7FAD0|B8A561|A0A0N4SU68|A0A2R8Q9D2|A2BGX6|A0A2R8Q9M0|A0A0N4STT5|A0A0G2L354|A0A2R8Q7G9|Q6IQX1|B8A568	myhc4	K1328k	AkNALAHAVQSAR	0	0.742592	0.0123933	0.086014	0.168417	0.526171	0.81039	-0.628766	0.00106869	0.0102227	-0.961182	5.15683e-05	0.0029459	0.5101	0.0137	0.1853	0.2674	0.2183	0.4699	-0.0139	-0.1294	-1.0252	-0.3408	NA	-0.167	-0.192	0.2916	0.2928
A2BGX6_K1356k_1_1_1356_1356	A2BGX6	B8JLS3|A0A2R8Q7G9|B8A561|A0A2R8Q2N5|A2BGX6|B8A569|A0A0R4INI3|F1R6C7	myhc4	K1356k	EQFEEEQEAkAELQR	0	-0.0327167	0.901474	0.954048	-0.1684	0.526903	0.81039	-0.628766	0.00106869	0.0102227	-0.961182	5.15683e-05	0.0029459	0.1463	-0.3975	0.2896	-0.3018	0.2363	-0.3044	0.0153	0.0747	0.2235	-0.3976	NA	0.4203	0.2637	-0.2109	0.1301
A2BGX6_K1365k_1_1_1365_1365	A2BGX6	E7FAD0|B8A561|A0A2R8Q2N5|A2BGX6|F1QZW1|B8A569|F1R6C7|Q6IQX1|B8A568	myhc4	K1365k	GMSkANSEVAQWR	0	1.87825	0.00721853	0.0638679	0.578108	0.390298	0.722865	-0.628766	0.00106869	0.0102227	-0.961182	5.15683e-05	0.0029459	0.9058	0.9735	0.4997	1.0313	0.2057	0.508	0.5122	0.2408	-0.918	0.0966	-3.5221	-0.8793	0.0156	0.4877	-0.3019
A2BGX6_K1376k_1_1_1376_1376	A2BGX6	E7FAD0|B8A561|A0A2R8Q2N5|A2BGX6|B8A569	myhc4	K1376k	TkYETDAIQRTEELEESKK	0	0.912675	0.000427808	0.0122638	1.07282	0.000195254	0.0121014	-0.628766	0.00106869	0.0102227	-0.961182	5.15683e-05	0.0029459	1.1178	1.4089	1.0461	1.7068	-0.0663	-0.077	0.2419	0.3137	0.3906	0.5223	0.4023	-0.9964	-1.3601	-0.7816	-1.0217
A2BGX6_K1392k_1_1_1392_1392	A2BGX6	E7FAD0|B8A561|A0A2R8Q2N5|A2BGX6|B8A569|F1R6C7|Q6IQX1|B8A568	myhc4	K1392k	TEELEESkK	0	1.1703	0.0588332	0.21205	-0.0896667	0.886643	0.972477	-0.628766	0.00106869	0.0102227	-0.961182	5.15683e-05	0.0029459	-0.5297	-0.5164	-0.88	-0.6668	0.5711	0.276	0.1511	-0.6849	-0.5799	-1.7404	-4.2689	0.6003	0.6461	0.2691	0.1741
A2BGX6_K1412k_1_1_1412_1412	A2BGX6	B8A561|A0A2R8Q2N5|A2BGX6|B8A569|F1R6C7|Q6IQX1|B8A568	myhc4	K1412k	LQEAEEQIEAVNSkCASLEK	0	1.47408	0.00422617	0.0474964	0.37785	0.43696	0.754234	-0.628766	0.00106869	0.0102227	-0.961182	5.15683e-05	0.0029459	0.7102	0.7455	0.479	1.0694	-0.2992	0.1328	0.8756	-0.8309	-1.1572	-0.5134	-0.3907	-1.777	0.7115	0.503	-0.0033
A2BGX6_K1418k_1_1_1418_1418	A2BGX6	B8A561|E9QF07|A0A2R8Q2N5|A2BGX6|F1QVX3|B8A569|F1R6C7|Q6IQX1|B8A568	myhc4	K1418k	CASLEkTK	0	1.15397	0.0348972	0.154422	1.0559	0.0295716	0.2171	-0.628766	0.00106869	0.0102227	-0.961182	5.15683e-05	0.0029459	0.7534	0.676	0.8648	0.7193	0.3168	-0.1015	0.6103	-0.4893	-0.3119	NA	NA	-2.263	-0.663	-0.2508	0.054
A2BGX6_K1446k_1_1_1446_1446	A2BGX6	A0A2R8Q2N5|A2BGX6|F1QVX3|B8A569|Q6IQX1|B8A568	myhc4	K1446k	ANALAANLDkK	0	0.13205	0.872152	0.937308	-0.0598167	0.934099	0.989074	-0.628766	0.00106869	0.0102227	-0.961182	5.15683e-05	0.0029459	-1.2601	-0.3883	-0.7945	-2.7377	1.5085	-2.1558	-0.2724	-1.8522	-1.0022	NA	NA	0.0633	-0.581	-0.4985	0.0292
A2BGX6_K1453k_1_1_1453_1453	A2BGX6	A0A2R8Q4Q8|E7FAD0|A0A0G2L6C1|F1R6C7|B6IDE1|Q6IQX1|B8A568|A0A2R8Q9I2|A0A2R8QGS1|A0A2R8Q9M0|A0A0N4STT5|A2BGX6|F1QVX3|B8A569|A0A0R4INI3|A0A2R8Q7G9|B8A561|A0A0N4SU68|A0A2R8Q9D2|A0A2R8Q2N5	myhc4	K1453k	NFDkVLAEWK	0	2.33105	0.0091394	0.0727474	0.426783	0.619775	0.868871	-0.628766	0.00106869	0.0102227	-0.961182	5.15683e-05	0.0029459	1.2595	-0.0601	1.6507	0.727	-0.7672	-0.4149	0.5951	-1.7154	-1.0764	-1.3054	-1.6499	-3.9211	0.1582	0.4602	0.8129
A2BGX6_K1459k_1_1_1459_1459	A2BGX6	A0A2R8Q8V2|A0A2R8QK05|A0A0G2L365|A0A2R8Q9I2|A0A2R8QGS1|A0A2R8Q9M0|A0A0N4STT5|A0A2R8Q7G9|F1R6C7|B6IDE1|Q6IQX1|B8A568|A0A2R8Q4Q8|E7FAD0|A0A0G2L6C1|A0A2R8QHZ3|A2BGX6|F1QVX3|B8A569|A0A0R4INI3|B8A561|A0A0N4SU68|A0A2R8Q9D2|A0A2R8Q2N5	myhc4	K1459k	VLAEWkQK	0	2.17245	0.0169576	0.103895	0.218642	0.805944	0.945267	-0.628766	0.00106869	0.0102227	-0.961182	5.15683e-05	0.0029459	0.5615	0.7866	0.3171	1.0102	0.4355	-0.3387	0.339	0.3612	0.8167	-3.1516	-4.0407	-0.3241	-0.4286	0.0711	0.3881
A2BGX6_K1461k_1_1_1461_1461	A2BGX6	E7FAD0|B8A561|A0A2R8Q2N5|A2BGX6|B8A569|F1R6C7|Q6IQX1|B8A568	myhc4	K1461k	QkYEEGQAELEGAQK	0	0.0331167	0.919408	0.965024	-0.00650833	0.984133	0.994332	-0.628766	0.00106869	0.0102227	-0.961182	5.15683e-05	0.0029459	-0.0822	-0.1983	0.1778	0.5477	0.5302	-0.7639	0.1694	-0.0901	0.4448	-0.1203	NA	0.4685	-0.0149	-0.319	-0.1943
A2BGX6_K1474k_1_1_1474_1474	A2BGX6	E7FAD0|B8A561|A0A2R8Q2N5|A2BGX6|B8A569|F1R6C7|Q6IQX1|B8A568	myhc4	K1474k	QKYEEGQAELEGAQkEAR	0	0.925475	0.00385484	0.0449846	0.105667	0.723539	0.910287	-0.628766	0.00106869	0.0102227	-0.961182	5.15683e-05	0.0029459	0.392	0.0797	0.0677	0.7438	0.4459	-0.1181	0.7407	-0.3321	-0.1717	-0.5886	-1.3263	0.3653	0.3285	0.1421	0.1661
A2BGX6_K1485k_1_1_1485_1485	A2BGX6	F1QVX3|B8A569|F1R6C7|Q6IQX1|E7FAD0|B8A561|A0A2R8Q2N5|A2BGX6|B8A568	myhc4	K1485k	SLSTELFkMK	0	0.872775	0.0014502	0.0257696	0.436308	0.0921673	0.383313	-0.628766	0.00106869	0.0102227	-0.961182	5.15683e-05	0.0029459	0.7865	0.9493	0.8011	1.2413	0.1807	0.2692	0.2498	-0.2855	0.0104	0.2684	0.2938	-0.7725	-0.1146	0.0033	0.0715
A2BGX6_K1487k_1_1_1487_1487	A2BGX6	B8A561|A0A2R8Q2N5|A2BGX6|B8A569|F1R6C7|Q6IQX1|B8A568	myhc4	K1487k	MkNSYEETLDQLETLK	0	0.60035	0.0100484	0.0768439	-0.111433	0.620462	0.86902	-0.628766	0.00106869	0.0102227	-0.961182	5.15683e-05	0.0029459	0.6975	1.2129	0.5942	0.6343	0.0193	-0.1462	-0.0574	0.2264	0.401	0.2878	-0.1777	0.2207	-0.0063	0.1486	-0.163
A2BGX6_K1501k_1_1_1501_1501	A2BGX6	B8A561|A0A2R8Q2N5|A2BGX6|B8A569|F1R6C7|Q6IQX1|B8A568	myhc4	K1501k	NSYEETLDQLETLkR	0	0.664275	0.0194004	0.111714	0.121608	0.636547	0.878716	-0.628766	0.00106869	0.0102227	-0.961182	5.15683e-05	0.0029459	0.0956	0.4569	-0.3647	-0.3547	0.6235	0.3269	0.0907	-0.9561	-0.4119	-0.75	NA	0.4164	0.1357	0.2143	0.1353
A2BGX6_K1505k_1_1_1505_1505	A2BGX6	B8A561|A0A2R8Q2N5|A2BGX6|F1R6C7|E7FAD0|B8A569|Q6IQX1|B8A568	myhc4	K1505k	RENkNLQQEISDLTEQIGETGK	0	1.23467	0.00250282	0.0341419	-0.204358	0.587266	0.848904	-0.628766	0.00106869	0.0102227	-0.961182	5.15683e-05	0.0029459	0.1402	-0.3854	-0.5082	0.634	0.4178	0.1074	0.282	-0.4972	-0.7492	-1.5628	-2.2489	0.5319	0.4723	0.4937	0.3958
A2BGX6_K1523k_1_1_1523_1523	A2BGX6	F1R6C7|B8A561|A0A2R8Q2N5|A2BGX6|B8A568|E7FAD0|B8A569|Q6IQX1	myhc4	K1523k	NLQQEISDLTEQIGETGkSIHELEK	0	0.2341	0.495529	0.6904	-0.669558	0.0840849	0.367937	-0.628766	0.00106869	0.0102227	-0.961182	5.15683e-05	0.0029459	-0.4588	-0.8875	-0.2961	-0.8506	0.4531	-0.9706	0.5354	-0.4939	-0.5704	-1.0046	-1.3605	0.9223	0.074	0.7829	0.9229
A2BGX6_K1530k_1_1_1530_1530	A2BGX6	E7FAD0|A2BGX6|F1R6C7|Q6IQX1	myhc4	K1530k	SIHELEkAK	0	0.7863	0.0312199	0.145432	0.177583	0.626597	0.873402	-0.628766	0.00106869	0.0102227	-0.961182	5.15683e-05	0.0029459	0.4228	0.1427	0.4548	0.0873	0.3349	-0.2923	0.6565	0.1112	0.2292	-0.9881	-1.3899	0.0867	-0.1828	0.1126	0.2053
A2BGX6_K1539k_1_1_1539_1539	A2BGX6	A2BGX6|F1R6C7|Q6IQX1	myhc4	K1539k	TVETEkAEIQTALEEAEGTLEHEESK	0	0.1301	0.6285	0.783348	-0.440767	0.142077	0.467493	-0.628766	0.00106869	0.0102227	-0.961182	5.15683e-05	0.0029459	-0.314	-0.8694	-0.7511	-0.7777	0.517	-0.0152	0.3326	-0.2781	-1.1205	-0.3846	-1.4494	0.611	0.553	0.89	0.8216
A2BGX6_K1559k_1_1_1559_1559	A2BGX6	A0A2R8Q2N5|A2BGX6|B8A569|F1R6C7	myhc4	K1559k	AEIQTALEEAEGTLEHEESkILR	0	NA	NA	NA	-0.899133	0.123697	0.43552	-0.628766	0.00106869	0.0102227	-0.961182	5.15683e-05	0.0029459	-0.6067	NA	-0.0747	-0.9983	-0.5612	-0.6619	-0.7757	NA	NA	NA	NA	NA	-1.206	1.1269	0.7777
A2BGX6_K1571k_1_1_1571_1571	A2BGX6	A2BGX6|F1QVX3|F1R6C7|Q6IQX1	myhc4	K1571k	VQLELNQVkGEIDR	0	1.56098	7.44471e-07	0.000589026	0.451858	0.0470223	0.271886	-0.628766	0.00106869	0.0102227	-0.961182	5.15683e-05	0.0029459	0.7552	0.6242	0.2251	0.7771	0.5453	0.3972	0.4571	-0.8757	-0.9035	-0.8336	-1.2495	0.2496	0.0513	-0.0823	-0.1599
A2BGX6_K1577k_1_1_1577_1577	A2BGX6	E7FAD0|B8A561|A0A2R8Q2N5|A2BGX6|F1QVX3|B8A569	myhc4	K1577k	kLAEKDEEIEQIK	0	0.824125	0.00893624	0.0717127	-0.118208	0.695968	0.900378	-0.628766	0.00106869	0.0102227	-0.961182	5.15683e-05	0.0029459	0.2346	-0.0812	0.303	-0.2528	0.6293	-0.1288	0.0985	-0.5747	-0.6092	-0.3742	-1.5348	0.1777	0.0482	0.3346	0.711
A2BGX6_K1581k_1_1_1581_1581	A2BGX6	E7FAD0|B8A561|A0A2R8Q2N5|A2BGX6|F1QVX3|B8A569|F1R6C7	myhc4	K1581k	LAEkDEEIEQIK	0	0.0176167	0.940223	0.974207	-0.903642	0.00153653	0.0399276	-0.628766	0.00106869	0.0102227	-0.961182	5.15683e-05	0.0029459	-0.6288	-0.836	-0.8027	-0.9415	0.1723	-0.713	-0.1825	-0.7668	-0.7335	-0.9593	NA	0.8478	0.6149	0.4395	0.7481
A2BGX6_K1589k_1_1_1589_1589	A2BGX6	E7FAD0|B8A561|A0A2R8Q2N5|A2BGX6|F1QVX3|B8A569|F1R6C7	myhc4	K1589k	LAEKDEEIEQIkR	0	0.69935	0.00820968	0.0685179	0.319425	0.217841	0.564613	-0.628766	0.00106869	0.0102227	-0.961182	5.15683e-05	0.0029459	0.595	0.7557	0.5362	0.6425	0.2672	0.1104	0.4876	0.1994	0.2359	0.0572	-0.7605	-0.0795	-0.239	0.2477	-0.0533
A2BGX6_K1619k_1_1_1619_1619	A2BGX6	E7FAD0|B8A561|A0A2R8Q2N5|A2BGX6|F1QVX3|B8A569|F1R6C7|Q6IQX1|B8A568	myhc4	K1619k M1620m	kmEGDLNEMEIQLSHANR	0	1.24445	0.118647	0.302234	-0.161517	0.845053	0.956096	-0.628766	0.00106869	0.0102227	-0.961182	5.15683e-05	0.0029459	0.7378	0.2783	1.2326	0.4821	-0.9395	0.0246	-0.3759	-1.4404	-1.0668	0.0486	0.2116	-3.4193	0.479	0.9413	0.924
A2BGX6_K1643k_1_1_1643_1643	A2BGX6	A0A2R8Q2N5|A2BGX6|F1QVX3|B8A569	myhc4	K1643k	QAAEAQkQLR	0	0.329325	0.171012	0.373384	-0.1875	0.460306	0.769687	-0.628766	0.00106869	0.0102227	-0.961182	5.15683e-05	0.0029459	0.1549	-0.0008	0.0045	-0.2485	0.3631	0.0448	0.4324	-0.7138	-0.0672	-0.0564	-0.5698	0.0068	0.6174	0.8096	0.4366
A2BGX6_K1653k_1_1_1653_1653	A2BGX6	B8A561|A0A2R8Q2N5|A2BGX6|B8A569|Q6IQX1|B8A568	myhc4	K1653k	NVQAQLkDAQLHLDDAVRGQEDMK	0	-0.669725	0.00746938	0.0646923	-1.77832	1.58123e-06	0.00107539	-0.628766	0.00106869	0.0102227	-0.961182	5.15683e-05	0.0029459	-2.0726	-1.6335	-1.9782	-2.1787	-0.1435	-0.6379	-0.9337	-1.4119	-1.1923	-1.1368	-1.4431	1.3209	1.412	1.1905	0.9031
A2BGX6_K1670k_1_1_1670_1670	A2BGX6	E7FAD0|B8A561|A0A2R8Q2N5|A2BGX6|B8A569|Q6IQX1|B8A568	myhc4	K1670k	GQEDMkEQVAMVER	0	0.897275	0.0606387	0.214022	-1.36445	0.0119994	0.132722	-0.628766	0.00106869	0.0102227	-0.961182	5.15683e-05	0.0029459	-2.9155	-3.2908	-2.9946	-3.6655	0.0485	-0.2566	-0.4963	-4.88	-3.3709	-2.9729	-5.2317	0.4275	1.8439	1.0876	1.1596
A2BGX6_K1702k_1_1_1702_1702	A2BGX6	E7FAD0|B8A561|A0A2R8Q2N5|A2BGX6|F1QVX3|B8A569|F1R6C7|Q6IQX1|B8A568	myhc4	K1702k	GRkVAEQELVDASER	0	1.6088	1.62748e-06	0.000786267	0.792683	0.00351813	0.0661286	-0.628766	0.00106869	0.0102227	-0.961182	5.15683e-05	0.0029459	0.988	1.2041	0.9673	1.3738	0.2552	0.1868	0.3237	-0.1976	-0.3192	-0.3653	-1.0199	-0.3214	-0.6398	-0.4322	-0.7564
A2BGX6_K1729k_1_1_1729_1729	A2BGX6	E7FAD0|B8A561|A0A2R8Q2N5|A2BGX6|B8A569|F1R6C7|Q6IQX1|B8A568	myhc4	K1729k	VGLLHSQNTSLLNTkK	0	0.776725	0.00102577	0.0204946	0.667342	0.00562565	0.0866306	-0.628766	0.00106869	0.0102227	-0.961182	5.15683e-05	0.0029459	0.2479	0.4504	-0.0785	0.2654	0.5196	0.7842	0.8081	-0.7617	-0.4548	-0.2679	-0.7373	0.0596	-0.0666	0.1573	-0.0038
A2BGX6_K1731k_1_1_1731_1731	A2BGX6	A2BGX6	myhc4	K1731k	kLESDLVQIQGEVEDTVQEAR	0	0.7591	0.0342171	0.153126	-0.394858	0.279736	0.628834	-0.628766	0.00106869	0.0102227	-0.961182	5.15683e-05	0.0029459	0.5029	-0.9482	0.6524	-0.6753	0.2153	0.1063	0.1697	-1.1473	-0.3565	-0.8923	-1.1085	0.2797	0.629	0.6124	0.7134
A2BGX6_K1756k_1_1_1756_1756	A2BGX6	A0A2R8Q4Q8|E7FAD0|A0A2R8QM44|A0A0G2L6C1|A0A2R8QHZ3|A0A2R8Q7G9|A0A0N4SU68|E9QF07|A0A2R8Q9D2|E7FD18|R4GDZ5|A0A2R8Q4J2|A0A0N4STT5|B8JLS3|A0A2R8Q9I2|A0A2R8QGS1|A0A2R8Q9M0|A2BGX6|F1QZW1|F1QVX3|B8A569|A0A0R4INI3|F1R6C7|B6IDE1|Q6IQX1|F1QSE1	myhc4	K1756k	NAEEkAK	0	0.148733	0.890439	0.94897	2.06174	0.0130201	0.139592	-0.628766	0.00106869	0.0102227	-0.961182	5.15683e-05	0.0029459	-0.2714	NA	-1.6843	0.874	-1.0165	1.4629	1.2866	-0.5093	NA	NA	NA	-1.3033	-0.9905	-1.1411	-2.5014
A2BGX6_K1759k_1_1_1759_1759	A2BGX6	A0A2R8Q4Q8|E7F5L1|A0A2R8Q8V2|A0A2R8QK05|A0A0G2L365|E7FAD0|A0A2R8QM44|A0A0G2L6C1|A0A2R8QHZ3|B8JLS3|A0A2R8Q9I2|A0A2R8QGS1|A0A2R8Q9M0|E7FD18|R4GDZ5|A0A2R8Q4J2|A0A0N4STT5|B6IDE1|Q6IQX1|B8A568|F1QSE1|A0A2R8Q9D2|A0A2R8Q2N5|A2BGX6|F1QZW1|A0A2R8Q7G9|B8A561|A0A0N4SU68|E9QF07|F1QVX3|B8A569|A0A0R4INI3|F1R6C7	myhc4	K1759k	kAITDAAMMAEELKK	0	0.399875	0.378282	0.588472	-0.812567	0.108172	0.410741	-0.628766	0.00106869	0.0102227	-0.961182	5.15683e-05	0.0029459	0.2078	-0.4921	0.0519	-0.6743	0.1138	-0.0359	-0.6025	-0.6598	0.5516	-0.2129	-2.1851	0.25	0.5167	0.7644	1.0197
A2BGX6_K1772k_1_1_1772_1772	A2BGX6	A0A2R8Q9M0|E7FD18|R4GDZ5|A0A2R8Q4J2|A0A0N4STT5|A0A2R8Q7G9|B8A561|A0A0N4SU68|E9QF07|A0A2R8Q9D2|A0A2R8Q2N5|A2BGX6|F1QZW1|A0A2R8Q4Q8|E7FAD0|A0A2R8QM44|A0A0G2L6C1|A0A2R8QHZ3|E7F5L1|A0A2R8Q8V2|A0A2R8QK05|A0A0G2L365|B8JLS3|A0A2R8Q9I2|A0A2R8QGS1|F1QVX3|B8A569|A0A0R4INI3|F1R6C7|B6IDE1|Q6IQX1|B8A568|F1QSE1	myhc4	K1772k	AITDAAMMAEELkK	0	-0.008125	0.969812	0.986718	-0.915767	0.00111311	0.0332231	-0.628766	0.00106869	0.0102227	-0.961182	5.15683e-05	0.0029459	-0.236	-0.131	-0.5051	-0.2594	-0.053	0.1228	-0.4834	-0.5024	-0.5087	-0.0014	-0.0865	0.7123	1.025	0.8635	0.5108
A2BGX6_K1773k_1_1_1773_1773	A2BGX6	E7FD18|R4GDZ5|A0A2R8Q4J2|A0A0N4STT5|A0A2R8Q4Q8|E7FAD0|A0A2R8QM44|A0A0G2L6C1|A0A2R8QHZ3|A0A2R8Q8V2|A0A2R8QK05|A0A0G2L365|B8JLS3|A0A2R8Q9I2|A0A2R8QGS1|A0A2R8Q9M0|A0A2R8Q7G9|B8A561|A0A0N4SU68|A0A2R8Q9D2|A0A2R8Q2N5|A2BGX6|F1QZW1|F1QVX3|B8A569|A0A0R4INI3|F1R6C7|B6IDE1|Q6IQX1|B8A568|F1QSE1	myhc4	K1773k	AITDAAMMAEELKkEQDTSAHLER	0	-0.229692	0.38946	0.598142	-0.358408	0.187419	0.526934	-0.628766	0.00106869	0.0102227	-0.961182	5.15683e-05	0.0029459	0.0691	0.2627	0.1001	-0.0348	0.235	-0.431	-0.0852	-0.1172	0.4742	0.6299	NA	0.3655	-0.1934	0.5823	0.3043
A2BGX6_K1786k_1_1_1786_1786	A2BGX6	A2BGX6|B8A569|F1R6C7	myhc4	K1786k	kNLEITVK	0	-3.8438	4.60648e-07	0.000532246	0.166167	0.74176	0.920776	-0.628766	0.00106869	0.0102227	-0.961182	5.15683e-05	0.0029459	-1.5193	-0.8764	-1.2155	-1.3608	-1.7482	-1.6323	-1.4736	1.4771	1.4764	3.7803	3.6694	-1.3832	-2.1531	-1.828	-1.7725
A2BGX6_K1793k_1_1_1793_1793	A2BGX6	A2BGX6|B8A569|F1R6C7	myhc4	K1793k	NLEITVkDLQHRLDEAENLAMK	0	-0.350825	0.182407	0.385266	-1.32258	0.000197482	0.0121014	-0.628766	0.00106869	0.0102227	-0.961182	5.15683e-05	0.0029459	-2.1163	-2.0317	-2.0459	-1.8085	0.1754	-0.5842	-0.341	-1.5468	-1.7748	-1.5036	-1.7739	1.56	1.4575	0.6013	0.6718
A2BGX6_K1808k_1_1_1808_1808	A2BGX6	E7FAD0|B8A561|A0A2R8Q2N5|A2BGX6|B8A569|F1R6C7|Q6IQX1|B8A568	myhc4	K1808k	DLQHRLDEAENLAMkGGK	0	-0.932275	0.000717856	0.0165107	-1.06997	0.000421431	0.0194136	-0.628766	0.00106869	0.0102227	-0.961182	5.15683e-05	0.0029459	-1.0473	-0.966	-1.2461	-0.887	0.0129	-0.1007	-0.5662	-0.0877	0.3424	-0.2845	-0.3875	1.0836	0.8043	0.9891	0.5309
A2BGX6_K1808kK1811k_2_2_1808_1811	A2BGX6	E7FAD0|B8A561|A0A2R8Q2N5|A2BGX6|B8A569|F1R6C7|Q6IQX1|B8A568	myhc4	K1808k K1811k	LDEAENLAMkGGkK	0	0.33535	0.478932	0.676562	-0.6056	0.243462	0.593399	-0.628766	0.00106869	0.0102227	-0.961182	5.15683e-05	0.0029459	-1.1647	-0.2627	-1.7188	-0.4914	0.081	0.2063	0.1264	-0.1246	-0.823	-1.2331	-2.7983	1.2603	0.762	0.743	0.2087
A2BGX6_K1812k_1_1_1812_1812	A2BGX6	A0A2R8Q2N5|A2BGX6|B8A569|F1R6C7|Q6IQX1|B8A568	myhc4	K1812k	kQLQKLESR	0	-2.8366	0.0900771	0.264064	0.4837	0.788516	0.940882	-0.628766	0.00106869	0.0102227	-0.961182	5.15683e-05	0.0029459	NA	NA	-1.0673	NA	NA	-2.3279	NA	NA	-0.5536	3.2819	2.5796	NA	NA	NA	-2.8116
A2BGX6_K1816k_1_1_1816_1816	A2BGX6	E7FAD0|B8A561|A0A2R8Q2N5|A2BGX6|B8A569|F1R6C7|Q6IQX1|B8A568	myhc4	K1816k	QLQkLESR	0	-0.18245	0.435972	0.639727	-0.760392	0.00746079	0.0986613	-0.628766	0.00106869	0.0102227	-0.961182	5.15683e-05	0.0029459	-0.1015	-0.6631	-0.3164	0.1012	0.0589	-0.0688	-0.2207	-0.1171	0.1484	0.2695	-0.5508	0.8831	0.7361	0.6652	0.4497
A2BGX6_K1840k_1_1_1840_1840	A2BGX6	E7FAD0|B8A561|A0A2R8Q2N5|A2BGX6|F1QVX3|B8A569	myhc4	K1840k	RGADAVkGVR	0	3.96582	9.04367e-06	0.00178884	1.41031	0.0307569	0.221602	-0.628766	0.00106869	0.0102227	-0.961182	5.15683e-05	0.0029459	-0.2646	1.0874	0.9595	1.3295	0.7146	0.0966	1.0066	-2.0946	-2.515	-4.954	NA	-1.3132	-0.1781	-0.5148	-1.2114
A2BGX6_K1850k_1_1_1850_1850	A2BGX6	E7FAD0|B8A561|A0A2R8Q2N5|A2BGX6|F1QVX3|B8A569|F1R6C7|Q6IQX1	myhc4	K1850k	RVkELTYQTEEDK	0	1.3429	7.39308e-06	0.00161591	0.368433	0.111234	0.416331	-0.628766	0.00106869	0.0102227	-0.961182	5.15683e-05	0.0029459	0.6161	0.7964	0.8016	1.1341	0.2485	0.2431	0.1946	-0.448	-0.2225	-0.4624	-0.8905	-0.0047	0.0192	-0.1289	-0.4444
A2BGX6_K1860k_1_1_1860_1860	A2BGX6	E7FAD0|B8A561|A0A2R8Q2N5|A2BGX6	myhc4	K1860k	ELTYQTEEDkK	0	0.8067	0.246249	0.459944	-0.369858	0.41406	0.736418	-0.628766	0.00106869	0.0102227	-0.961182	5.15683e-05	0.0029459	-0.1983	-0.9201	-0.5646	NA	0.3726	-1.3878	0.1589	NA	-1.3677	NA	NA	0.5799	-0.2619	-0.4439	0.4636
A2BGX6_K1861k_1_1_1861_1861	A2BGX6	A2BGX6|F1R6C7	myhc4	K1861k	ELTYQTEEDKkNINR	0	-0.653425	0.359098	0.573526	-0.190375	0.802054	0.943911	-0.628766	0.00106869	0.0102227	-0.961182	5.15683e-05	0.0029459	-0.3807	2.8925	2.0802	-0.9025	-2.0169	-3.6077	-2.0866	0.9108	2.0354	1.578	1.779	-1.5247	-2.6523	-2.9388	-2.4043
A2BGX6_K1872k_1_1_1872_1872	A2BGX6	A0A0G2L365|B8JLS3|A0A2R8Q9I2|A0A2R8QGS1|A0A2R8Q9M0|A0A0N4SU68|A0A2R8Q9D2|A0A2R8Q2N5|A2BGX6|A0A2R8Q4J2|A0A0N4STT5|A0A2R8Q7G9|B8A561|F1R6C7|B6IDE1|Q6IQX1|B8A568|F1QSE1	myhc4	K1872k	LQDLVDkLQLK	0	-0.8651	0.479203	0.676562	0.5126	0.551541	0.826218	-0.628766	0.00106869	0.0102227	-0.961182	5.15683e-05	0.0029459	-0.7483	NA	-0.2573	NA	0.0769	NA	-0.9059	NA	0.3623	NA	NA	-1.8104	-2.1059	-1.0598	1.2677
A2BGX6_K1897k_1_1_1897_1897	A2BGX6	F1QAF1|B8A561|A0A2R8Q2N5|A2BGX6|B8A569|F1R6C7	myhc4	K1897k	QSEEAEEQANSHLSkLR	0	1.38055	2.97299e-05	0.0032011	-0.551725	0.0459854	0.268552	-0.628766	0.00106869	0.0102227	-0.961182	5.15683e-05	0.0029459	-0.0368	0.183	0.3303	0.5546	0.2521	-0.1951	-0.0645	-0.9804	-0.6167	-1.2491	-1.6449	0.7602	0.5408	0.567	0.3289
A2BGX6_K1900k_1_1_1900_1900	A2BGX6	F1QAF1|A2BGX6|F1R6C7	myhc4	K1900k	LRkVQHELEEAEERADISESQVNK	0	0.98295	0.00117298	0.0221351	-0.528508	0.0655353	0.325888	-0.628766	0.00106869	0.0102227	-0.961182	5.15683e-05	0.0029459	0.089	0.2063	0.4646	0.5576	0.2544	-0.3328	-0.1143	-0.6254	-0.1588	-0.4981	-1.332	0.3296	0.3417	0.6151	0.5707
A2BGX6_K1921k_1_1_1921_1921	A2BGX6	A2BGX6|F1R6C7	myhc4	K1921k	VQHELEEAEERADISESQVNkLR	0	0.7079	0.0213734	0.117927	-0.909458	0.00496678	0.0781505	-0.628766	0.00106869	0.0102227	-0.961182	5.15683e-05	0.0029459	-0.0378	-0.2088	0.4621	0.1473	-0.2804	-0.8466	-0.5483	-0.5457	-0.9836	-0.3223	NA	0.8841	-0.0135	0.3799	0.1536
A2BGX6_K215k_1_1_215_215	A2BGX6	A2BGX6	myhc4	K215k	EQAPGkMQGSLEDQIIAANPLLEAYGNAK	0	1.85022	0.000653724	0.0153936	-0.30465	0.485267	0.788192	-0.628766	0.00106869	0.0102227	-0.961182	5.15683e-05	0.0029459	0.3119	-0.3151	0.0572	0.209	0.1212	-0.4252	0.7012	-2.1603	-0.4982	-2.6949	NA	0.6527	0.5631	0.4096	0.1228
A2BGX6_K215kK238k_2_2_215_238	A2BGX6	A2BGX6	myhc4	K215k K238k	EQAPGkMQGSLEDQIIAANPLLEAYGNAkTVR	0	0.2224	0.727005	0.852914	-1.00461	0.0263113	0.205795	-0.628766	0.00106869	0.0102227	-0.961182	5.15683e-05	0.0029459	-1.1663	NA	-0.3379	NA	0.1203	-0.886	-1.2423	NA	-0.9745	NA	NA	-0.0747	0.2201	0.2784	0.9173
A2BGX6_K22k_1_1_22_22	A2BGX6	A0A2R8Q2N5|A2BGX6|B8A569|F1R6C7	myhc4	K22k	AAIYLRKPEkER	0	-0.459275	0.41875	0.622212	1.80094	0.00860541	0.106727	-0.628766	0.00106869	0.0102227	-0.961182	5.15683e-05	0.0029459	0.9732	0.969	1.0389	0.7411	-0.1211	0.1013	0.0692	1.0156	1.7633	1.5607	1.2197	-2.0289	-3.9797	-0.2331	-0.8962
A2BGX6_K238k_1_1_238_238	A2BGX6	A0A0R4IHN7|B8A561|A0A2R8Q2N5|A2BGX6	myhc4	K238k	MQGSLEDQIIAANPLLEAYGNAkTVR	0	0.618967	0.15171	0.349444	-0.671683	0.0280384	0.21216	-0.628766	0.00106869	0.0102227	-0.961182	5.15683e-05	0.0029459	-0.699	NA	-0.71	-1.1003	0.0396	-0.4986	-0.5605	NA	-1.4554	NA	NA	0.0428	0.0696	0.5742	0.6408
A2BGX6_K355k_1_1_355_355	A2BGX6	B8A561|A0A2R8Q2N5|A2BGX6|B8A569|F1R6C7|Q6IQX1|B8A568	myhc4	K355k	MGIYkFTGAVLHHGNMK	0	0.92335	0.100131	0.277782	0.447925	0.443632	0.759886	-0.628766	0.00106869	0.0102227	-0.961182	5.15683e-05	0.0029459	0.5357	0.4451	0.6038	0.3785	0.251	0.4992	0.4774	-1.9639	-1.1554	0.777	0.612	-1.3063	0.4602	0.2291	0.4621
A2BGX6_K367k_1_1_367_367	A2BGX6	B8A561|A0A2R8Q2N5|A2BGX6|B8A569|F1R6C7|Q6IQX1|B8A568	myhc4	K367k	FTGAVLHHGNMkFK	0	-0.164875	0.574461	0.745755	-0.410342	0.205709	0.549957	-0.628766	0.00106869	0.0102227	-0.961182	5.15683e-05	0.0029459	-0.1105	-0.2631	-0.4348	-0.1744	0.4814	0.2733	-0.3118	-0.9047	0.3209	0.5608	-0.3003	0.6626	0.689	0.3375	0.5428
A2BGX6_K371k_1_1_371_371	A2BGX6	A0A2R8Q2N5|A2BGX6|B8A569|F1R6C7|Q6IQX1|B8A568	myhc4	K371k	QkQREEQAEPDGTEEADK	0	1.12389	0.0245547	0.129137	-0.267242	0.558996	0.830351	-0.628766	0.00106869	0.0102227	-0.961182	5.15683e-05	0.0029459	-0.6672	-1.717	-1.0877	-0.7604	0.5418	0.405	-0.0218	-1.162	-1.789	-3.5949	NA	0.4142	0.7462	0.5335	0.6084
A2BGX6_K409k_1_1_409_409	A2BGX6	B8A561|A0A2R8Q2N5|A2BGX6|F1QVX3|B8A569|F1R6C7|Q6IQX1|B8A568	myhc4	K409k	VkVGNEFVTK	0	-0.840225	0.0360676	0.157281	-0.255767	0.526428	0.81039	-0.628766	0.00106869	0.0102227	-0.961182	5.15683e-05	0.0029459	-0.8328	-2.3565	-0.7457	-0.6017	0.5861	-0.1196	0.5218	0.038	0.1339	-0.5118	-0.8359	0.8941	0.2029	0.8511	0.3927
A2BGX6_K409kK417k_2_2_409_417	A2BGX6	B8A561|A0A2R8Q2N5|A2BGX6|B8A569|F1R6C7|Q6IQX1|B8A568	myhc4	K409k K417k	VkVGNEFVTkGQTVPQVYNSVSALSK	0	-0.483325	0.184557	0.386954	-0.447583	0.251622	0.602399	-0.628766	0.00106869	0.0102227	-0.961182	5.15683e-05	0.0029459	-0.3039	-0.8422	-0.5438	-1.4337	-0.0851	0.3519	-0.2123	0.1669	-0.2604	-0.1131	-0.9837	0.0932	1.4459	0.0293	0.2946
A2BGX6_K417k_1_1_417_417	A2BGX6	A2BGX6|B8A569|F1R6C7|Q6IQX1	myhc4	K417k	VGNEFVTkGQTVPQVYNSVSALSK	0	0.393725	0.206924	0.413429	-0.554833	0.10578	0.405545	-0.628766	0.00106869	0.0102227	-0.961182	5.15683e-05	0.0029459	-0.5457	-1.0195	-1.2368	-0.112	0.2747	0.3579	-0.0825	-1.0733	-1.2843	-0.9573	-1.174	-0.0532	1.348	0.9613	0.6967
A2BGX6_K433k_1_1_433_433	A2BGX6	A2BGX6	myhc4	K433k	GQTVPQVYNSVSALSkSIYEK	0	0.1656	0.774942	0.88318	-0.715292	0.176265	0.513944	-0.628766	0.00106869	0.0102227	-0.961182	5.15683e-05	0.0029459	-0.123	-1.9926	-1.1492	-0.1164	-0.432	-0.1892	-0.3108	NA	-0.6952	-1.3266	NA	-0.5673	1.5084	0.2016	0.4758
A2BGX6_K454k_1_1_454_454	A2BGX6	B8A561|A0A2R8Q2N5|A2BGX6|B8A569|F1R6C7|Q6IQX1|B8A568	myhc4	K454k	INQMLDTkQQR	0	0.254075	0.759904	0.875417	-0.964758	0.291106	0.64117	-0.628766	0.00106869	0.0102227	-0.961182	5.15683e-05	0.0029459	-0.1608	-1.6768	-1.7005	-2.3524	-0.0578	-0.6976	-0.3055	0.0403	0.1449	-3.3526	-3.7394	1.7303	1.2706	-0.3353	-0.2211
A2BGX6_K506k_1_1_506_506	A2BGX6	A0A2R8Q4Q8|F1Q9G9|E7FAD0|A0A2R8QM44|A0A2R8Q9M0|A0A2R8QLD9|A0A0N4STT5|A0A0G2L354|A0A0G2L365|B8JLS3|A0A2R8Q9I2|A0A2R8QGS1|A0A2R8Q7G9|A0A0R4IHN7|B8A561|A0A0N4SU68|A0A0G2L6C1|A0A2R8QHZ3|A0A2R8Q8V2|A0A2R8QK05|F1QVX3|B8A569|A0A0R4INI3|F1R6C7|A0A2R8Q9D2|A0A2R8Q2N5|A2BGX6|F1QZW1|B6IDE1|Q6IQX1|B8A568|F1QSE1	myhc4	K506k	LQQFFNHHMFVLEQEEYkK	0	2.54303	5.46784e-05	0.00379487	-0.137208	0.78543	0.940452	-0.628766	0.00106869	0.0102227	-0.961182	5.15683e-05	0.0029459	-0.3414	-0.0987	-0.5705	0.2193	0.3403	0.5097	0.6403	-1.8116	-1.4971	-4.1759	-3.4788	0.7278	0.9571	0.5246	0.3264
A2BGX6_K553k_1_1_553_553	A2BGX6	A2BGX6	myhc4	K553k	ATDVSFkNK	0	-0.205983	0.714919	0.844182	-0.1389	0.853872	0.959891	-0.628766	0.00106869	0.0102227	-0.961182	5.15683e-05	0.0029459	0.881	1.2098	-0.3257	NA	NA	NA	-0.6045	NA	0.1431	1.4456	NA	NA	-0.4168	NA	-0.5144
A2BGX6_K563k_1_1_563_563	A2BGX6	B8A561|A0A2R8Q2N5|A2BGX6|B8A569|F1R6C7|Q6IQX1	myhc4	K563k	LYDQHLGkCNAFQK	0	-0.31065	0.126284	0.3133	-0.287908	0.185093	0.525501	-0.628766	0.00106869	0.0102227	-0.961182	5.15683e-05	0.0029459	-0.1085	0.224	-0.0574	-0.1465	0.3109	-0.0034	-0.0469	0.1165	0.4206	0.462	0.1551	0.6663	0.4127	0.2186	0.2015
A2BGX6_K569k_1_1_569_569	A2BGX6	A2BGX6|F1R6C7	myhc4	K569k	CNAFQkPRPQK	0	-1.28372	0.0423618	0.175506	-0.654375	0.274198	0.625175	-0.628766	0.00106869	0.0102227	-0.961182	5.15683e-05	0.0029459	0.0886	-2.3784	0.0104	-0.7644	-0.027	-1.608	0.4557	0.6051	0.607	0.3562	NA	0.5756	-0.5888	0.5066	0.5517
A2BGX6_K574k_1_1_574_574	A2BGX6	A2BGX6|F1R6C7	myhc4	K574k	CNAFQKPRPQkGK	0	-0.66385	0.101895	0.2811	-0.431542	0.311021	0.655623	-0.628766	0.00106869	0.0102227	-0.961182	5.15683e-05	0.0029459	0.7771	1.1266	1.0119	0.6858	-0.8545	-0.8928	-1.9213	0.644	2.3094	1.6079	1.6955	0.1927	-1.3014	-0.8735	-1.1831
A2BGX6_K59k_1_1_59_59	A2BGX6	B8A561|A0A2R8Q2N5|A2BGX6|B8A569|F1R6C7|B8A568	myhc4	K59k	DGGkVTVITLDTK	0	0.808925	0.452381	0.654445	-0.241083	0.834295	0.953886	-0.628766	0.00106869	0.0102227	-0.961182	5.15683e-05	0.0029459	-0.0308	0.015	0.0819	-0.5069	-1.0342	0.0958	-0.3613	-2.3995	-2.2085	-0.0786	1.0101	-4.3396	1.4379	1.4437	0.6894
A2BGX6_K602k_1_1_602_602	A2BGX6	B8A561|A0A2R8Q2N5|A2BGX6|B8A569|F1R6C7|Q6IQX1|B8A568	myhc4	K602k	NkDPLNESVVQLYQK	0	0.4651	0.216526	0.42531	-0.684017	0.0993216	0.396908	-0.628766	0.00106869	0.0102227	-0.961182	5.15683e-05	0.0029459	-0.3704	-0.9731	-0.1732	-0.4417	0.2285	-0.3289	0.0684	-0.7166	-0.4778	-0.4987	-2.1257	-0.0946	0.7694	0.9626	1.056
A2BGX6_K602kK615k_2_2_602_615	A2BGX6	A0A2R8Q2N5|A2BGX6|B8A569|F1R6C7|Q6IQX1|B8A568	myhc4	K602k K615k	NkDPLNESVVQLYQkSSVK	0	0.270225	0.420753	0.624577	-0.649958	0.085053	0.369391	-0.628766	0.00106869	0.0102227	-0.961182	5.15683e-05	0.0029459	-0.3498	-1.2784	-0.3963	-0.6863	0.2177	0.0602	-0.2168	-0.7321	-0.511	-0.7379	-1.8107	0.327	1.3871	0.2296	0.7376
A2BGX6_K615k_1_1_615_615	A2BGX6	A0A2R8Q2N5|A2BGX6|B8A569|F1R6C7	myhc4	K615k	NKDPLNESVVQLYQkSSVK	0	0.41905	0.191105	0.395403	-0.370442	0.280124	0.628834	-0.628766	0.00106869	0.0102227	-0.961182	5.15683e-05	0.0029459	0.2566	0.3603	-0.1709	-0.0221	0.1059	0.5393	-0.2485	-0.9584	-0.6055	0.0914	0.2202	-0.0166	0.8353	0.9656	0.2264
A2BGX6_K619k_1_1_619_619	A2BGX6	B8A561|A0A2R8Q2N5|A2BGX6|B8A569|Q6IQX1|B8A568	myhc4	K619k	SSVkLLATLYPPVVEETGGGK	0	1.3276	0.0583276	0.211413	-0.0667667	0.925268	0.986736	-0.628766	0.00106869	0.0102227	-0.961182	5.15683e-05	0.0029459	0.7453	0.1073	0.4914	0.3565	-0.916	0.1359	0.4145	-1.6758	-1.5806	-0.4001	0.0466	-2.5841	0.8918	0.7719	0.7
A2BGX6_K642k_1_1_642_642	A2BGX6	B8A561|A0A2R8Q2N5|A2BGX6|B8A569|F1R6C7|Q6IQX1|B8A568	myhc4	K642k	kGGSMQTVSSQFR	0	1.04345	0.00183561	0.0289309	0.408908	0.191355	0.531233	-0.628766	0.00106869	0.0102227	-0.961182	5.15683e-05	0.0029459	0.703	0.3365	1.0903	0.7735	0.3989	0.7346	-0.1812	-0.6368	-0.0627	-0.3513	-0.2197	-0.7438	-0.0943	0.4113	0.0609
A2BGX6_K659k_1_1_659_659	A2BGX6	A0A2R8Q2N5|A2BGX6|F1QVX3|B8A569	myhc4	K659k	ENLGkLMTNLR	0	-1.92777	0.00111452	0.0212996	-1.0095	0.0507084	0.283426	-0.628766	0.00106869	0.0102227	-0.961182	5.15683e-05	0.0029459	-1.3318	-1.0646	-1.5874	-1.695	0.5803	-0.8708	-1.0832	0.1111	1.2236	0.1895	NA	1.7192	0.511	-0.1331	0.1093
A2BGX6_K681k_1_1_681_681	A2BGX6	E7FAD0|B8A561|A0A2R8Q2N5|A2BGX6	myhc4	K681k	CLIPNESkTPGLMENFLVIHQLR	0	0.88125	0.029723	0.142441	-0.832083	0.0531239	0.291868	-0.628766	0.00106869	0.0102227	-0.961182	5.15683e-05	0.0029459	-0.2592	-0.1444	0.1257	-0.05	-0.1669	-0.2296	-0.0728	-1.424	-1.0758	-1.4829	0.1298	-0.3848	1.1938	1.0682	0.8254
A2BGX6_K68k_1_1_68_68	A2BGX6	A0A2R8Q2N5|A2BGX6|B8A569|F1R6C7	myhc4	K68k	VTVITLDTkEER	0	-0.498233	0.198812	0.403748	-0.83945	0.0297769	0.217771	-0.628766	0.00106869	0.0102227	-0.961182	5.15683e-05	0.0029459	-0.8433	-0.6073	-0.7053	NA	-0.1471	-0.0117	-0.77	-0.2078	0.2218	NA	-0.6752	1.242	0.6375	0.5273	-0.2874
A2BGX6_K725k_1_1_725_725	A2BGX6	E7FAD0|B8A561|A0A2R8Q2N5|A2BGX6|B8A568	myhc4	K725k	YkVLNASVIPEGQFIDNK	0	-0.0237	0.969446	0.986656	-0.247908	0.711324	0.905502	-0.628766	0.00106869	0.0102227	-0.961182	5.15683e-05	0.0029459	0.1178	-0.145	0.1315	0.0053	-0.5737	0.1011	-0.0924	-0.5842	-0.3239	0.5739	0.5386	-2.5542	0.891	0.9371	0.9644
A2BGX6_K725kK741k_2_2_725_741	A2BGX6	A0A2R8Q2N5|A2BGX6|F1QVX3|B8A569|F1R6C7|Q6IQX1|B8A568	myhc4	K725k K741k	YkVLNASVIPEGQFIDNkK	0	0.483125	0.149095	0.346137	-0.417825	0.242171	0.592633	-0.628766	0.00106869	0.0102227	-0.961182	5.15683e-05	0.0029459	0.115	0.9624	1.0491	-0.3979	-0.0943	-0.3069	-0.2396	0.0596	0.1042	-0.4802	0.1125	-0.2686	0.8161	0.1081	0.1613
A2BGX6_K74k_1_1_74_74	A2BGX6	A2BGX6	myhc4	K74k	VVkEDDVHPMNPPKYDK	0	-0.1615	0.63625	0.788671	-1.09534	0.00838352	0.105317	-0.628766	0.00106869	0.0102227	-0.961182	5.15683e-05	0.0029459	-1.1565	-1.1889	-1.4235	-1.3191	0.0769	-0.3028	-0.4295	-0.4323	-0.2886	-1.8168	-1.9043	1.1801	0.8337	0.9542	0.5395
A2BGX6_K764k_1_1_764_764	A2BGX6	A0A0G2L354|B8A561|A0A0N4SU68|A0A2R8Q9D2|A0A2R8Q2N5|A2BGX6|F1QZW1|F1QVX3|A0A2R8QK05|A0A0G2L365|B8JLS3|A0A2R8Q9I2|A0A2R8QGS1|A0A2R8Q9M0|E7FD18|R4GDZ5|B8A569|F1R6C7|Q6IQX1|B8A568	myhc4	K764k	FGHTkVFFK	0	-0.852975	0.0460367	0.18546	0.048025	0.911272	0.983728	-0.628766	0.00106869	0.0102227	-0.961182	5.15683e-05	0.0029459	-0.5084	-0.6356	-0.313	-0.0606	0.4294	-1.0459	1.2054	0.8378	0.8917	0.0779	0.0869	0.3432	-0.4615	0.2664	0.445
A2BGX6_K768k_1_1_768_768	A2BGX6	E7FAD0|B8A561|A0A2R8Q2N5|A2BGX6|F1QVX3|B8A569|F1R6C7|Q6IQX1|B8A568	myhc4	K768k	VFFkAGLLGTLEEMRDEK	0	-0.591125	0.24989	0.463228	0.375825	0.491913	0.790153	-0.628766	0.00106869	0.0102227	-0.961182	5.15683e-05	0.0029459	-0.2576	-0.051	0.0306	0.4717	0.4036	0.4989	-0.3349	0.8679	0.8077	0.4711	0.4115	0.1733	-2.2375	0.5591	0.7586
A2BGX6_K782k_1_1_782_782	A2BGX6	A2BGX6|Q6IQX1	myhc4	K782k	AGLLGTLEEMRDEkLATLVTMTQALCR	0	NA	NA	NA	-2.1986	0.00220433	0.0496804	-0.628766	0.00106869	0.0102227	-0.961182	5.15683e-05	0.0029459	NA	NA	-1.3368	NA	NA	-1.3401	-2.2115	NA	NA	NA	NA	NA	NA	0.2632	0.5824
A2BGX6_K805k_1_1_805_805	A2BGX6	E7FAD0|A2BGX6|B8A569|F1R6C7|Q6IQX1|B8A568	myhc4	K805k	EFVkMMER	0	-1.86627	0.00129285	0.0237884	-1.09493	0.017699	0.164876	-0.628766	0.00106869	0.0102227	-0.961182	5.15683e-05	0.0029459	-2.7949	-2.4638	-1.1446	-1.428	0.009	-0.3589	-0.7617	0.1933	-0.3764	NA	NA	1.2426	0.9103	0.4987	0.246
A2BGX6_K827k_1_1_827_827	A2BGX6	E7FAD0|B8A561|A0A2R8Q2N5|A2BGX6|F1QVX3|B8A569	myhc4	K827k	SFMNVkHWPWMK	0	-0.305825	0.320149	0.534845	0.07725	0.81325	0.947902	-0.628766	0.00106869	0.0102227	-0.961182	5.15683e-05	0.0029459	-0.6413	-0.6807	-0.0693	0.3725	0.5135	0.5397	0.0919	-0.2319	0.2641	0.2029	-0.0306	0.5954	0.8291	-0.4368	0.2301
A2BGX6_K843k_1_1_843_843	A2BGX6	E7FAD0|B8A561|A0A2R8Q2N5|A2BGX6|F1QVX3|B8A569	myhc4	K843k	IKPLLkSAETEK	0	0.144325	0.666166	0.810937	-0.56785	0.129705	0.447876	-0.628766	0.00106869	0.0102227	-0.961182	5.15683e-05	0.0029459	-0.5519	-0.5577	-0.8483	-0.1246	-0.0462	0.047	0.1435	-0.2881	0.0716	-1.0997	-1.3436	1.3061	0.7957	0.293	0.069
A2BGX6_K849k_1_1_849_849	A2BGX6	B8A561|A0A2R8Q2N5|A2BGX6|B8A569|Q6IQX1	myhc4	K849k	SAETEkELATMK	0	0.82595	0.0975951	0.274599	-0.919217	0.0421707	0.255831	-0.628766	0.00106869	0.0102227	-0.961182	5.15683e-05	0.0029459	-0.8066	-2.2893	-1.4874	-0.5039	-0.2309	-0.4173	0.1041	NA	-1.7903	-2.4052	NA	0.1338	1.3719	0.864	0.5817
A2BGX6_K855k_1_1_855_855	A2BGX6	B8A561|A0A2R8Q2N5|A2BGX6|B8A569|Q6IQX1|B8A568	myhc4	K855k	ELATMkEDFVK	0	0.2144	0.448116	0.65055	-0.787808	0.018143	0.167523	-0.628766	0.00106869	0.0102227	-0.961182	5.15683e-05	0.0029459	0.0792	-0.0197	-0.3301	-0.1214	-0.0544	-0.3089	-0.0958	-0.3552	0.0248	-0.769	-0.1502	1.2811	0.8493	0.5631	-0.1544
A2BGX6_K85k_1_1_85_85	A2BGX6	A2BGX6	myhc4	K85k	VVKEDDVHPMNPPkYDK	0	0.23295	0.379139	0.589227	0.452975	0.099112	0.396818	-0.628766	0.00106869	0.0102227	-0.961182	5.15683e-05	0.0029459	0.2474	0.5515	0.6262	-0.0277	0.3078	0.0961	0.1154	-0.0939	0.5895	-0.1464	NA	0.0125	-0.3393	-0.6449	-0.1478
A2BGX6_K860k_1_1_860_860	A2BGX6	A2BGX6	myhc4	K860k	EDFVkCKEDLVK	0	-0.728825	0.0782846	0.243805	0.18275	0.667234	0.892682	-0.628766	0.00106869	0.0102227	-0.961182	5.15683e-05	0.0029459	0.2712	1.6893	1.054	-0.3625	-0.7151	-1.0332	-0.2122	1.6143	1.9792	0.9083	1.0655	-0.6991	-1.2781	-0.5679	-0.7999
A2BGX6_K867k_1_1_867_867	A2BGX6	A2BGX6|F1R6C7	myhc4	K867k	EDLVkAEAK	0	0.013475	0.96264	0.982762	-0.815658	0.0174522	0.164335	-0.628766	0.00106869	0.0102227	-0.961182	5.15683e-05	0.0029459	-0.4904	-0.4701	-0.5532	-0.2462	0.0657	-0.6449	-0.0644	0.0551	0.0183	-1.1211	-0.7661	0.9584	0.7887	0.4388	0.2186
A2BGX6_K912k_1_1_912_912	A2BGX6	A2BGX6|F1R6C7	myhc4	K912k	NDLQLAVASEAENLSDAEERCEGLIkSK	0	0.951625	0.00625333	0.0587722	-0.467925	0.168926	0.50545	-0.628766	0.00106869	0.0102227	-0.961182	5.15683e-05	0.0029459	-0.1435	-0.8267	-0.2716	0.523	-0.0191	0.0008	0.3123	-1.0336	-0.7021	-1.6952	-1.0944	0.8362	0.7522	0.7122	-0.0369
A2BGX6_K914k_1_1_914_914	A2BGX6	B8A561|A0A2R8Q2N5|A2BGX6|F1QVX3|B8A569|A0A0R4INI3|F1R6C7|Q6IQX1|E7FAD0|A0A2R8Q8V2|B8JLS3|A0A2R8Q7G9	myhc4	K914k	SkIQLEAK	0	-0.567375	0.0261074	0.133404	0.104117	0.681103	0.897262	-0.628766	0.00106869	0.0102227	-0.961182	5.15683e-05	0.0029459	-0.1732	0.0832	0.1118	-0.0514	0.3779	0.1355	0.1258	0.3284	0.673	1.0085	0.23	0.3376	-0.3756	0.4523	0.0215
A2BGX6_K920k_1_1_920_920	A2BGX6	E7FAD0|B8A561|A0A2R8Q2N5|A2BGX6|F1QVX3|B8A569	myhc4	K920k	IQLEAkLK	0	1.00042	0.0608181	0.214435	0.217383	0.664648	0.8911	-0.628766	0.00106869	0.0102227	-0.961182	5.15683e-05	0.0029459	0.707	-0.0631	0.4904	-0.1086	0.4954	-0.7746	0.8082	0.2549	-0.6358	-1.8511	NA	0.3581	-0.8342	0.3847	-0.0728
A2BGX6_K941k_1_1_941_941	A2BGX6	E7FAD0|B8A561|A0A2R8Q2N5|A2BGX6	myhc4	K941k	ETTERLEDEEEINAELTAkK	0	0.665	0.194	0.398117	-0.0438083	0.920092	0.984987	-0.628766	0.00106869	0.0102227	-0.961182	5.15683e-05	0.0029459	-0.0189	-1.0378	0.6148	-1.1455	-0.4227	0.4385	0.4467	-0.9955	-1.1282	NA	NA	-0.5033	0.6888	0.2971	0.3093
A2BGX6_K944k_1_1_944_944	A2BGX6	A0A2R8Q4Q8|F1QAF1|A0A0G2L354|A0A2R8Q7G9|B8A561|A0A0N4SU68|A0A2R8Q8V2|A0A2R8QK05|A0A0G2L365|B8JLS3|A0A2R8Q9I2|A0A2R8QGS1|A0A2R8Q9M0|A0A0N4STT5|A0A2R8Q9D2|A0A2R8Q2N5|A2BGX6|F1QZW1	myhc4	K944k	RkLEDECSELKK	0	1.48228	0.000733641	0.0167762	-0.0687833	0.85854	0.961272	-0.628766	0.00106869	0.0102227	-0.961182	5.15683e-05	0.0029459	0.3381	-0.133	0.0869	0.6885	0.1656	0.0782	0.3285	-0.5441	-0.4444	-1.6737	-2.2864	0.569	0.2137	0.3126	-0.0571
A2BGX6_K953k_1_1_953_953	A2BGX6	B8A569|A0A0R4INI3|F1R6C7|B6IDE1|A0A2R8QGS1|A0A2R8Q9M0|A0A0N4STT5|A0A0G2L354|A0A2R8Q7G9|B8A561|A0A0N4SU68|A0A2R8Q9D2|A0A2R8Q2N5|A2BGX6|F1QZW1|F1QVX3	myhc4	K953k	LEDECSELkK	0	1.04268	0.0737744	0.238173	-0.345233	0.56457	0.834513	-0.628766	0.00106869	0.0102227	-0.961182	5.15683e-05	0.0029459	-0.2555	-0.6615	-1.042	-0.0342	0.1479	0.5755	-0.0086	-0.8018	-0.2516	-1.3193	-3.7912	0.6866	0.5714	0.6994	0.3766
A2BGX6_K954k_1_1_954_954	A2BGX6	A0A2R8QM44|A0A0G2L6C1|A0A2R8QHZ3|A0A2R8Q8V2|A0A2R8Q2N5|A2BGX6|F1QZW1|F1QVX3|A0A2R8QK05|A0A0G2L365|B8JLS3|A0A2R8Q9I2|A0A2R8QGS1|A0A2R8Q9M0|A0A0N4STT5|A0A0G2L354|A0A2R8Q7G9|B8A561|A0A0N4SU68|A0A2R8Q9D2|B8A569|A0A0R4INI3|F1R6C7|B6IDE1|E9QF07	myhc4	K954k	kDIDDLELTLAK	0	NA	NA	NA	-0.474625	0.360946	0.701476	-0.628766	0.00106869	0.0102227	-0.961182	5.15683e-05	0.0029459	-0.3954	-2.1933	-0.6259	-0.8738	0.0547	-0.6783	-0.1126	NA	NA	NA	NA	-1.008	0.5358	0.4081	0.981
A2BGX6_K965k_1_1_965_965	A2BGX6	E7FD18|R4GDZ5|A0A2R8Q4Q8|F1QAF1|A0A0G2L354|A0A2R8Q7G9|B8A561|A0A0N4SU68|A0A2R8Q9I2|A0A2R8QGS1|A0A2R8Q9M0|A0A0N4STT5|A0A2R8Q9D2|A0A2R8Q2N5|A2BGX6|F1QZW1|A0A2R8Q8V2|A0A2R8QK05|A0A0G2L365|B8JLS3	myhc4	K965k	DIDDLELTLAkVEK	0	2.24582	0.0440148	0.180476	0.0359667	0.974435	0.993504	-0.628766	0.00106869	0.0102227	-0.961182	5.15683e-05	0.0029459	0.7563	-0.4442	0.8457	0.7435	-2.0267	0.2536	0.654	-3.3517	-2.2001	-1.2395	-0.2907	-4.2934	1.1658	0.952	0.5396
A2BGX6_K978k_1_1_978_978	A2BGX6	E7FAD0|A2BGX6|F1R6C7|Q6IQX1	myhc4	K978k	VkNLTEEMASQDESIAK	0	1.08268	0.00188207	0.0292823	0.4085	0.208861	0.553441	-0.628766	0.00106869	0.0102227	-0.961182	5.15683e-05	0.0029459	0.4812	0.2398	0.465	0.8911	0.0573	-0.0646	0.9358	-0.3608	-0.2099	-0.3996	-1.2833	0.3257	-0.2471	-0.136	-0.3386
A2BGX6_K993k_1_1_993_993	A2BGX6	E7FAD0|A2BGX6|F1R6C7|Q6IQX1	myhc4	K993k	NLTEEMASQDESIAkLTK	0	0.85155	0.00559939	0.0555168	0.201433	0.490397	0.789153	-0.628766	0.00106869	0.0102227	-0.961182	5.15683e-05	0.0029459	0.3662	-0.2199	0.4177	0.2282	0.3197	0.3333	0.7337	-0.4889	0.028	-1.2278	-0.9253	0.1413	0.5571	0.2398	0.105
A2BGX6_K999k_1_1_999_999	A2BGX6	B8A561|A0A2R8Q2N5|A2BGX6|F1QVX3	myhc4	K999k	kALQEAHQQTLDDLQAEEDK	0	1.41371	0.000408153	0.0120496	0.1593	0.612444	0.863041	-0.628766	0.00106869	0.0102227	-0.961182	5.15683e-05	0.0029459	0.638	0.2204	0.4082	0.6445	0.2736	-0.025	0.3787	-0.8986	-0.1939	-1.7153	NA	0.3594	0.1396	-0.0709	-0.2289
A2BHA3_K101k_1_1_101_101	A2BHA3	A2BHA3	ckma	K101k	DLFDPVISDRHGGYkATDK	0	1.05402	0.0825406	0.251177	0.414367	0.534743	0.815737	0.666682	0.00316703	0.0199259	-0.488866	0.0289556	0.140372	2.1568	1.8745	1.5205	1.8909	-4.0821	-2.0135	-1.7076	1.1683	0.8936	0.7198	0.4449	-1.4057	-4.3383	NA	-3.3023
A2BHA3_K105k_1_1_105_105	A2BHA3	A2BHA3	ckma	K105k	ATDkHKTDLNFENLK	0	-1.2509	0.00506375	0.0521672	0.631317	0.146443	0.473704	0.666682	0.00316703	0.0199259	-0.488866	0.0289556	0.140372	0.5636	1.5952	1.4899	-0.4653	-0.8163	-1.7026	-1.3413	2.0784	2.2455	2.1407	1.7224	-1.6691	-1.7986	-2.4341	-1.7704
A2BHA3_K107k_1_1_107_107	A2BHA3	A2BHA3	ckma	K107k	HkTDLNFENLK	0	-0.00428333	0.98736	0.993015	-0.362558	0.193672	0.532726	0.666682	0.00316703	0.0199259	-0.488866	0.0289556	0.140372	0.1718	-0.0026	0.0362	-0.3724	0.2943	-0.5309	-0.0422	0.1016	0.2395	-0.4535	NA	0.6573	0.0624	0.14	0.2188
A2BHA3_K116k_1_1_116_116	A2BHA3	A2BHA3	ckma	K116k	TDLNFENLkGGDDLDPNYVLSSR	0	1.15805	0.132087	0.320968	0.56335	0.484287	0.788192	0.666682	0.00316703	0.0199259	-0.488866	0.0289556	0.140372	0.4856	-0.1643	0.0408	-0.0762	-0.916	0.5523	0.8167	-0.8486	-1.5553	-0.8469	-1.0955	-3.4541	1.1503	0.5818	0.0726
A2BHA3_K156k_1_1_156_156	A2BHA3	A2BHA3	ckma	K156k	RAVEkLSVEALSSLDGEFK	0	0.8864	0.0964924	0.273285	-0.751433	0.0585931	0.308183	0.666682	0.00316703	0.0199259	-0.488866	0.0289556	0.140372	0.6223	-0.1347	-0.0959	-0.1245	-1.1966	-0.1765	-0.1086	NA	-0.8196	NA	NA	NA	-0.1392	0.3993	0.5125
A2BHA3_K25k_1_1_25_25	A2BHA3	A2BHA3	ckma	K25k	LNYSVDEEYPDLSkHNNHMAK	0	0.355475	0.141245	0.33439	-0.243517	0.340301	0.685058	0.666682	0.00316703	0.0199259	-0.488866	0.0289556	0.140372	0.2072	0.1721	-0.2758	-0.2583	0.1898	0.011	0.3678	-0.4156	0.0767	-0.2655	-0.9723	0.4609	0.4445	0.5109	0.3159
A2BHA3_K369k_1_1_369_369	A2BHA3	A2BHA3	ckma	K369k	KLEkGESIDSMIPAQK	0	0.465825	0.0511551	0.196666	-0.213042	0.383841	0.717902	0.666682	0.00316703	0.0199259	-0.488866	0.0289556	0.140372	0.6328	0.338	0.1675	-0.0631	0.2261	-0.2009	0.1933	-0.0091	0.0547	-0.2621	-0.5716	0.5527	0.1713	0.3407	0.0788
A2BHA3_K36k_1_1_36_36	A2BHA3	A2BHA3	ckma	K36k	VLTkEMYGK	0	0.168842	0.5517	0.728012	-0.00380833	0.989219	0.995345	0.666682	0.00316703	0.0199259	-0.488866	0.0289556	0.140372	0.1754	0.436	-0.0187	0.266	-0.3308	0.4135	0.1386	0.225	0.309	-0.3965	NA	0.4035	0.2135	0.1759	-0.4826
A2BHA3_K41k_1_1_41_41	A2BHA3	A2BHA3	ckma	K41k	EMYGkLRDK	0	1.40832	0.0592554	0.213104	2.34703	0.00411675	0.0708711	0.666682	0.00316703	0.0199259	-0.488866	0.0289556	0.140372	2.2531	2.1801	1.9352	1.8534	-5.4859	-2.2455	-1.5064	0.9354	-0.3311	1.3371	NA	-5.5253	-5.1981	-5.5104	-5.4714
A2BHB8_K13k_1_1_13_13	A2BHB8	A2BHB8	isg15	K13k	LLGGDVkR	0	-0.6882	0.0949168	0.270526	0.213775	0.536963	0.816631	-0.591729	0.0929572	0.192219	0.750828	0.0529172	0.204843	-1.6739	-1.2963	-0.9349	-1.2569	0.2299	0.6125	0.0903	-0.129	-1.0756	NA	NA	0.8416	0.0591	-0.5395	0.0273
A2BHB8_K40k_1_1_40_40	A2BHB8	A2BHB8	isg15	K40k	QVISQYFNVPTFkQK	0	-0.57305	0.183856	0.386695	0.437	0.340933	0.685058	-0.591729	0.0929572	0.192219	0.750828	0.0529172	0.204843	-1.3398	-0.2729	-1.4007	-1.1463	1.2441	0.9466	-0.0877	-0.0133	-0.4705	-0.3591	-1.0246	1.1996	-0.8163	0.2554	0.4173
A2BHB8_K90k_1_1_90_90	A2BHB8	A2BHB8	isg15	K90k	NEkGQVK	0	1.09425	0.215131	0.424045	1.96014	0.035508	0.233718	-0.591729	0.0929572	0.192219	0.750828	0.0529172	0.204843	-0.2558	-1.1537	-0.9866	2.1079	-1.7209	1.8978	0.8127	-0.1887	-2.0732	-1.237	NA	-2.4732	-1.2304	-1.4268	-1.3907
A2BHD8_K382k_1_1_382_382	A2BHD8	F1QTE2|F1QUU0|A2BHD8	hexb	K382k	LLDIVAATkK	0	NA	NA	NA	-0.3325	0.501704	0.795457	-0.117132	0.511455	0.635137	0.207312	0.288796	0.543883	NA	NA	0.1484	NA	NA	-0.5255	NA	NA	NA	NA	NA	NA	-0.2285	NA	-0.1575
A2BHN0_K154k_1_1_154_154	A2BHN0	A2BHN0	anxa3a	K154k	ELSAAYAEETkK	0	0.143225	0.529377	0.713531	-0.0256917	0.916264	0.984987	0.404157	0.014262	0.0532369	-0.273917	0.0991086	0.29394	-0.1944	-0.0542	-0.4307	-0.2951	0.2954	0.7154	-0.0291	-0.0525	-0.4405	-0.5014	-0.5529	0.5904	0.5947	-0.0258	0.2524
A2BHN0_K238k_1_1_238_238	A2BHN0	A0A2R8RX36|A0A0R4ISB3|A2BHN0	anxa3a	K238k	NFSkNTLQK	0	-0.6134	0.285687	0.495041	0.513108	0.310166	0.65469	0.404157	0.014262	0.0532369	-0.273917	0.0991086	0.29394	-0.9065	-0.5628	-1.2485	-2.0194	0.5102	1.1341	-0.6251	0.1149	-1.2567	NA	NA	0.5294	-0.0582	-0.4337	-0.731
A2BHN0_K313k_1_1_313_313	A2BHN0	A2BHN0	anxa3a	K313k	TLYkSSLYK	0	-0.364	0.417902	0.621978	0.512558	0.148902	0.477216	0.404157	0.014262	0.0532369	-0.273917	0.0991086	0.29394	-0.0089	-0.5754	NA	NA	-0.3559	0.8356	0.0679	NA	-0.164	0.3077	NA	-0.8249	-0.138	-0.0549	-0.3023
A2BHN0_K46k_1_1_46_46	A2BHN0	A2BHN0	anxa3a	K46k	kAIEGVGTNEK	0	-0.15125	0.684507	0.823357	-0.268892	0.472925	0.777756	0.404157	0.014262	0.0532369	-0.273917	0.0991086	0.29394	-1.0036	-1.1001	0.2382	-0.3335	0.5012	-0.1958	-0.296	-0.381	0.0236	-0.8381	NA	0.5372	-0.1088	-0.0868	0.7465
A2BIA5_K111k_1_1_111_111	A2BIA5	E9QEJ0|A2BIA5	bloc1s2	K111k	LTSLkYMEMK	0	0.087725	0.845137	0.92358	-0.0943667	0.773796	0.934043	-0.334776	0.00772912	0.0356755	-0.187673	0.125897	0.339389	0.2073	0.8487	0.0055	0.857	-0.632	0.076	-0.1136	NA	0.3919	NA	NA	0.1817	-0.2612	NA	-0.307
A2BIN8_K103k_1_1_103_103	A2BIN8	A2BIN8	nos2a	K103k	SLkIPGSTEQQAR	0	NA	NA	NA	1.1235	0.105104	0.404302	0.192042	0.653705	0.755017	-0.228982	0.620743	0.812604	NA	NA	NA	NA	0.5645	0.7251	-1.523	NA	NA	NA	NA	-0.0534	-1.0989	-2.0461	-1.6068
A2BIN8_K14k_1_1_14_14	A2BIN8	A2BIN8	nos2a	K14k	QAQTTIIENEkQTVQSK	0	-0.197733	0.593742	0.758425	0.0670417	0.855824	0.961054	0.192042	0.653705	0.755017	-0.228982	0.620743	0.812604	-0.1609	-0.1689	-1.3542	-0.8176	0.7211	0.4063	-0.3844	-0.1473	-0.0966	-1.0391	NA	0.6076	0.0959	-0.0276	0.0466
A2BIN8_K180k_1_1_180_180	A2BIN8	A2BIN8	nos2a	K180k	TAEDMFHALCTHLkYATNGGNLR	0	-0.8796	0.13256	0.321641	1.01763	0.0183883	0.168305	0.192042	0.653705	0.755017	-0.228982	0.620743	0.812604	-0.3619	NA	-1.0987	NA	0.7445	0.6815	-0.1165	NA	0.1493	NA	NA	NA	-0.9195	-0.1911	-0.6328
A2BIN8_K20k_1_1_20_20	A2BIN8	A2BIN8	nos2a	K20k	QTVQSkRPVDRPIR	0	-0.4659	0.586706	0.75387	0.68415	0.215296	0.56127	0.192042	0.653705	0.755017	-0.228982	0.620743	0.812604	-1.2007	NA	NA	NA	0.6962	0.9827	-0.7966	NA	-1.1777	-0.2919	NA	0.2925	-0.5765	-1.37	0.0938
A2BIN8_K54k_1_1_54_54	A2BIN8	A2BIN8	nos2a	K54k	AAkNTPCNSK	0	NA	NA	NA	1.78003	0.0294111	0.216498	0.192042	0.653705	0.755017	-0.228982	0.620743	0.812604	NA	NA	NA	-0.6524	-0.5036	0.9163	-0.1375	NA	NA	NA	NA	NA	NA	NA	-1.6883
A2BIN8_K635k_1_1_635_635	A2BIN8	A2BIN8	nos2a	K635k	DACEEFNIkK	0	0.08975	0.753023	0.871705	0.575667	0.076314	0.352957	0.192042	0.653705	0.755017	-0.228982	0.620743	0.812604	-0.5374	-0.2628	-0.7861	-0.603	1.0076	1.1506	-0.1012	-0.5542	-0.46	-0.5963	-0.9378	0.6076	0.0125	0.138	-0.3181
A2BIR4_K100k_1_1_100_100	A2BIR4	A2BIR4|A2BIR5|A2BIR3	A2BIR4_K100k_1_1_100_100	K100k	IEIIFPAEYPFkPPK	0	-0.92655	0.126807	0.313773	-0.253708	0.60124	0.856405	0.0539828	0.495114	0.620924	-0.143526	0.107917	0.311755	NA	NA	-0.1157	-0.8272	-0.5224	-0.2748	-0.0963	0.1018	1.1064	0.1571	NA	-1.4532	0.1547	0.2654	0.8566
A2BIR4_K109k_1_1_109_109	A2BIR4	A2BIR4|A2BIR5|A2BIR3|A0A2R8QI56|Q6IQK2	A2BIR4_K109k_1_1_109_109	K109k	TkIYHPNIDEK	0	0.7425	0.00750601	0.0646923	1.08924	0.000780118	0.0274811	0.0539828	0.495114	0.620924	-0.143526	0.107917	0.311755	0.9712	0.5949	0.4819	1.278	0.269	0.5359	0.3416	0.615	0.2486	-0.0903	-0.4173	-0.7549	-0.6867	-0.6488	-0.7379
A2BIR4_K118k_1_1_118_118	A2BIR4	A2BIR4|A2BIR5|A2BIR3|A0A2R8QI56|Q6IQK2	A2BIR4_K118k_1_1_118_118	K118k	IYHPNIDEkGQVCLPVISAENWKPATK	0	0.6432	0.0164379	0.101926	0.778408	0.00850498	0.105795	0.0539828	0.495114	0.620924	-0.143526	0.107917	0.311755	0.5764	0.0905	-0.0295	0.7657	0.4993	0.6386	0.7345	0.1961	-0.1634	-0.4736	-0.7288	-0.3508	-0.0996	-0.0324	-0.1343
A2BIR4_K167k_1_1_167_167	A2BIR4	A2BIR4|A2BIR5|A2BIR3|A0A2R8QI56|Q6IQK2	A2BIR4_K167k_1_1_167_167	K167k	TDQVIQSLIALVNDPQPEHPLRADLAEEYSkDR	0	NA	NA	NA	NA	NA	NA	0.0539828	0.495114	0.620924	-0.143526	0.107917	0.311755	NA	NA	NA	NA	NA	NA	NA	NA	NA	NA	NA	NA	NA	0.3093	-0.8878
A2BIR4_K174k_1_1_174_174	A2BIR4	A2BIR4|A2BIR5|A2BIR3|A0A2R8QI56	A2BIR4_K174k_1_1_174_174	K174k	FFkNAEEFTK	0	NA	NA	NA	0.6414	0.0929274	0.385313	0.0539828	0.495114	0.620924	-0.143526	0.107917	0.311755	0.2614	0.1042	-0.1331	0.4822	-0.4492	0.9822	-0.1475	NA	NA	NA	NA	-0.1265	-0.2121	-0.7348	-0.9782
A2BIR4_K181k_1_1_181_181	A2BIR4	A2BIR4|A2BIR5|A2BIR3|A0A2R8QI56|Q6IQK2	A2BIR4_K181k_1_1_181_181	K181k	NAEEFTkK	0	-0.807375	0.00391542	0.0454234	0.0594833	0.819621	0.948417	0.0539828	0.495114	0.620924	-0.143526	0.107917	0.311755	-0.5319	-0.5845	0.1785	0.261	0.3517	-0.4256	0.2123	0.6454	0.6325	0.6253	0.6494	0.0088	-0.1386	0.1055	-0.0291
A2BIR4_K56k_1_1_56_56	A2BIR4	A2BIR4|A2BIR3|A0A2R8QI56|Q6IQK2	A2BIR4_K56k_1_1_56_56	K56k	SGMkNFR	0	0.1254	0.587969	0.754462	0.879192	0.00264093	0.055947	0.0539828	0.495114	0.620924	-0.143526	0.107917	0.311755	0.5185	0.3862	0.4265	1.0322	0.4446	0.8069	0.3819	0.3388	0.0365	0.6112	0.8753	-0.2352	-0.2333	-0.5564	-0.314
A2CE51_K275k_1_1_275_275	A2CE51	A0A286Y8X9|A2CE51	A2CE51_K275k_1_1_275_275	K275k	YFDPSCGkFSK	0	0.148325	0.678597	0.818701	-0.381183	0.330595	0.676935	0.953058	3.72477e-05	0.00151426	0.291116	0.105953	0.3072	0.6016	0.48	0.284	0.3531	-0.266	-0.4786	0.2861	0.7033	0.1919	0.9084	-0.6782	-0.0122	-0.4456	0.3681	1.0031
A2CE51_K278k_1_1_278_278	A2CE51	A0A286Y8X9|A2CE51	A2CE51_K278k_1_1_278_278	K278k	FSkTANNADGK	0	0.811092	0.0351768	0.155312	0.442692	0.224057	0.573061	0.953058	3.72477e-05	0.00151426	0.291116	0.105953	0.3072	0.5174	0.5198	0.3979	0.1522	0.3686	-0.8244	0.9702	-0.1899	-0.4682	-0.5847	NA	-0.1905	-0.6723	-0.3863	0.1642
A2CE51_K317k_1_1_317_317	A2CE51	A0A286Y8X9|A2CE51	A2CE51_K317k_1_1_317_317	K317k	EETQkLIEK	0	-0.365175	0.440233	0.641932	-0.83245	0.0601382	0.311618	0.953058	3.72477e-05	0.00151426	0.291116	0.105953	0.3072	-0.3537	-0.4882	-0.3346	0.3836	0.3482	-1.7149	-0.5482	NA	-0.0262	0.3601	NA	0.6129	0.2225	-0.037	-0.0218
A2CE51_K608k_1_1_608_608	A2CE51	A2CE51	A2CE51_K608k_1_1_608_608	K608k	LYMkSRPFPDGLAEDIDKGDVSSR	0	0.103383	0.73699	0.860611	-0.1489	0.629352	0.874749	0.953058	3.72477e-05	0.00151426	0.291116	0.105953	0.3072	0.4995	0.3452	-0.7052	-0.2581	0.3031	0.2345	-0.0477	0.3539	-0.1478	-0.6052	NA	0.4078	0.2215	0.2448	0.3747
A2CEI3_K133k_1_1_133_133	A2CEI3	A2CEI3	rabep1	K133k	LQFQQkLEQER	0	-0.088575	0.799407	0.896913	-0.350367	0.358469	0.700409	-1.23142	0.137639	0.252139	0.264943	0.757495	0.89071	0.2655	0.2547	0.382	1.0403	-0.8402	0.5185	0.2738	-0.0882	0.4769	0.8113	1.0968	-0.2991	0.6868	0.3994	0.5505
A2CET2_K53k_1_1_53_53	A2CET2	X1WG01|E7FE03|A2CET2|F1Q9P4|Q1LVM0|Q7T2F5	A2CET2_K53k_1_1_53_53	K53k	AANMFkMAK	0	-0.1218	0.708023	0.838605	-0.259733	0.371425	0.708378	-0.078878	0.282731	0.41642	0.0795554	0.314427	0.569652	0.1385	1.0219	0.1684	0.7166	0.0493	-0.7081	-0.265	NA	0.8343	0.432	NA	-0.1687	0.2407	-0.0639	-0.2009
A2CEW4_K365k_1_1_365_365	A2CEW4	A2CEW4	atic	K365k	NGNYCVLkMDPEYEPDEEEVR	0	-1.47126	0.178198	0.381261	-1.35151	0.213893	0.559002	-0.518952	0.362982	0.498364	-0.124696	0.837088	0.928617	-1.1743	-1.289	-0.6628	-0.0464	-2.029	-1.029	-2.8635	-1.5157	NA	1.1529	2.3972	-2.5439	2.5657	-1.2985	-1.2126
A2CEW4_K405k_1_1_405_405	A2CEW4	A2CEW4	atic	K405k	ELFSNIVSkGK	0	-0.91085	0.0110207	0.0797501	-0.225792	0.516225	0.803575	-0.518952	0.362982	0.498364	-0.124696	0.837088	0.928617	-0.2921	-0.1565	0.2072	0.2907	-0.15	-0.0424	-0.0799	0.3349	0.3103	1.5375	1.51	0.3733	0.6348	-0.2739	-0.1941
A2RV40_K208k_1_1_208_208	A2RV40	A2RV40	rnf126	K208k	IkSLPTVQIK	0	0.170092	0.617952	0.775085	0.0222083	0.947845	0.989668	0.817061	0.00245282	0.0169302	-0.0929205	0.698887	0.859011	-0.429	-0.2434	-0.3192	-0.1403	0.23	0.3262	-0.4631	-0.4721	-0.0098	-0.8773	NA	0.7557	0.2792	-0.377	-0.6226
A3FKT8_K4k_1_1_4_4	A3FKT8	A3FKT8	icn2	K4k	SGkMSDTQK	0	0.507725	0.434923	0.638655	-0.0175917	0.979809	0.994226	1.27051	0.116726	0.225124	-0.312394	0.708035	0.864558	-0.4295	-0.3139	-0.9903	-1.1487	1.3298	-0.1665	0.1619	0.2374	-1.0759	-0.3944	-3.6804	1.0961	-0.0158	0.6061	0.1509
A3FKT8_K55k_1_1_55_55	A3FKT8	A3FKT8	icn2	K55k	TTDkASLDNIFK	0	-0.246625	0.473719	0.673306	-0.200692	0.587962	0.849	1.27051	0.116726	0.225124	-0.312394	0.708035	0.864558	0.0129	-0.2069	-0.1575	-0.547	0.6042	-0.2004	0.0229	0.6272	0.4914	0.1514	-1.182	0.0592	0.3613	0.5211	0.4301
A3KMS9_K30k_1_1_30_30	A3KMS9	A3KMS9	prkacaa	K30k	AKEDFLkK	0	0.4005	0.216813	0.425598	0.00773333	0.981918	0.994251	0.0795167	0.482466	0.609764	0.0761054	0.532848	0.75233	0.4054	0.1992	-0.2738	0.0124	-0.3723	0.2076	0.3703	0.5249	-0.1324	-0.6238	-1.0275	0.4867	0.0085	-0.2798	0.0278
A3KP47_K10k_1_1_10_10	A3KP47	A3KP47	A3KP47_K10k_1_1_10_10	K10k	ACIYGDIMkVGTTGASKK	0	0.037875	0.936585	0.972986	-1.14478	0.0155478	0.154364	-0.149869	0.702091	0.791021	-0.164092	0.698237	0.859011	-0.125	-0.4779	0.6954	0.52	-0.8403	-0.644	-0.8197	NA	-0.5897	0.8202	NA	-0.4396	0.22	0.8224	0.9043
A3KP47_K18k_1_1_18_18	A3KP47	A3KP47	A3KP47_K18k_1_1_18_18	K18k	VGTTGASkK	0	1.63135	0.0502127	0.195292	1.92555	0.00646521	0.0895594	-0.149869	0.702091	0.791021	-0.164092	0.698237	0.859011	-0.2421	NA	NA	1.5734	NA	0.2208	1.0005	-0.9657	NA	NA	NA	NA	-1.4826	-1.1864	-1.2757
A3KPI6_K38k_1_1_38_38	A3KPI6	A3KPI6	si:ch211-288g17.3	K38k	FTTEkASSHNARPSK	0	0.101025	0.746626	0.867191	-0.004025	0.990474	0.995345	0.347476	0.0526401	0.1299	0.632261	0.00332216	0.0368929	0.2268	0.1232	0.2456	0.3139	0.2806	0.4663	-0.1319	0.5181	0.1363	0.0031	-0.1521	-0.8993	0.7187	0.5741	0.4426
A3KPI6_K49k_1_1_49_49	A3KPI6	A3KPI6	si:ch211-288g17.3	K49k	kVDFFCPDIVIK	0	0.641175	0.209411	0.415878	-0.455467	0.402016	0.730495	0.347476	0.0526401	0.1299	0.632261	0.00332216	0.0368929	0.4254	0.0504	1.0472	0.218	0.0453	-0.4879	-0.0385	0.4775	0.6127	0.1018	-2.0157	-0.0869	-0.4185	0.8111	0.8747
A3KPI6_K60k_1_1_60_60	A3KPI6	A3KPI6	si:ch211-288g17.3	K60k	KVDFFCPDIVIkAK	0	-0.321717	0.167124	0.368119	-0.388592	0.100181	0.398756	0.347476	0.0526401	0.1299	0.632261	0.00332216	0.0368929	-0.1378	-0.4945	-0.4979	-0.5356	0.2372	-0.093	0.2993	-0.3842	0.2823	-0.1823	NA	0.3875	0.6321	0.6019	0.5242
A3KPR3_K25k_1_1_25_25	A3KPR3	A3KPR3	histh1l1	K25k	kPGPSVSDLIVK	0	-0.017575	0.971793	0.987801	-1.01195	0.0101515	0.118208	1.92062	0.000207409	0.00389988	1.4554	0.00336959	0.037224	-0.1209	-0.3929	0.2755	-0.7284	0.063	-1.1254	0.1315	NA	-0.2241	NA	NA	0.743	0.6726	0.8243	0.5667
A3KPR3_K53k_1_1_53_53	A3KPR3	A3KPR3	histh1l1	K53k	GVSLAALkK	0	NA	NA	NA	0.0988833	0.875281	0.967354	1.92062	0.000207409	0.00389988	1.4554	0.00336959	0.037224	0.3409	-1.6959	-0.2028	0.8257	NA	0.2067	-0.3694	NA	NA	NA	NA	NA	0.0804	-0.2884	-0.3327
A3KPR3_K96k_1_1_96_96	A3KPR3	A3KPR3	histh1l1	K96k	GTGASGSFkVSK	0	0.024425	0.924867	0.967336	-0.460292	0.114918	0.421835	1.92062	0.000207409	0.00389988	1.4554	0.00336959	0.037224	0.545	0.6537	0.2738	0.5628	-0.2288	-0.0696	-0.1089	1.0206	0.6841	0.306	-0.0731	0.3445	0.7449	0.4238	-0.2151
A3KPX2_K711k_1_1_711_711	A3KPX2	A3KPX2|A0A2R8QRC7	abcf1	K711k	LNPTkGEMR	0	-0.25725	0.401472	0.607136	-0.550417	0.107716	0.410122	0.192797	0.0741568	0.164979	0.0411918	0.706848	0.864046	-0.1387	-0.0361	0.071	-0.2162	0.2369	-0.1058	-0.7226	0.4682	0.6864	0.1989	-0.6445	0.6327	0.6543	-0.1459	0.2719
A3KQV2_K317k_1_1_317_317	A3KQV2	A3KQV2	brox	K317k	KLGAVIkNTLEK	0	0.160633	0.669635	0.813349	0.0257833	0.945225	0.989668	-1.30236	0.0745515	0.165432	0.191086	0.796202	0.909039	0.6051	-0.011	1.5303	0.568	-0.0745	0.0304	0.55	0.4296	-0.1551	1.2629	NA	0.296	0.3188	-0.0237	-0.0197
A3KQX1_K50k_1_1_50_50	A3KQX1	A3KQX1	cndp2	K50k	MMEMAGkDIER	0	0.17535	0.469285	0.670054	0.046975	0.856375	0.96106	-0.222284	0.18013	0.303421	0.0839625	0.628433	0.818757	0.6021	0.1555	0.2556	0.0368	0.2416	0.4217	0.162	0.5071	0.2289	-0.5581	0.1707	0.0552	0.4336	0.0345	0.3892
A3QK15_K24k_1_1_24_24	A3QK15	A3QK15	aacs	K24k	VLWYPDSkR	0	-0.297325	0.450353	0.652838	-0.141433	0.737598	0.918328	-0.0434674	0.936798	0.958036	-0.000651027	0.999123	0.999753	0.0798	-0.3927	-0.1401	-0.0179	0.0002	-0.2342	-0.2752	1.0388	0.2559	0.462	-1.0383	0.757	0.1957	-0.7245	-0.3414
A4FUL3_K105k_1_1_105_105	A4FUL3	E9QBL1|A4FUL3	rbx1	K105k	QVCPLDNREWEFQkYGH	0	-0.363408	0.116705	0.300968	-0.0364833	0.869129	0.966033	0.47946	0.0194395	0.0656821	-0.189155	0.347362	0.598051	-0.3087	0.4042	0.4198	0.09	0.0479	0.1861	0.0584	0.4118	0.5973	0.5351	NA	0.0391	0.2226	0.2569	0.0172
A4FUP0_K112k_1_1_112_112	A4FUP0	A4FUP0	sult2st3	K112k	LMPSSFYkSK	0	1.0139	0.031334	0.145661	2.06626	0.000436611	0.0194198	0.601048	0.66679	0.765252	0.556935	0.711587	0.867225	1.6376	1.2886	0.4812	0.65	0.3135	1.7219	-0.1351	-0.5284	-0.7569	0.7836	0.5035	-1.6983	-1.1281	-1.7248	-1.1801
A4FUP0_K222k_1_1_222_222	A4FUP0	A4FUP0	sult2st3	K222k	VVSNSTFkNMK	0	-0.944392	0.0291009	0.141256	-0.374917	0.351139	0.694983	0.601048	0.66679	0.765252	0.556935	0.711587	0.867225	-1.3097	-0.6585	-0.717	-1.5345	0.4652	0.2569	0.1192	0.2876	0.2978	-0.917	NA	1.6099	0.616	0.1858	0.2097
A4FUP0_K257k_1_1_257_257	A4FUP0	A4FUP0	sult2st3	K257k	GVAGDWkNFFSPELDAK	0	0.64495	0.115293	0.299625	-1.05597	0.0226054	0.189145	0.601048	0.66679	0.765252	0.556935	0.711587	0.867225	0.7884	0.3315	1.1279	0.3904	-0.2731	-0.7084	0.2207	-0.8235	-0.0494	NA	0.9167	0.831	NA	1.0993	0.4768
A4FVK4_K100k_1_1_100_100	A4FVK4	A4FVK4|A5PLC7	A4FVK4_K100k_1_1_100_100	K100k	SFDNIkNWIR	0	0.4174	0.085298	0.255829	-0.223175	0.37633	0.712224	0.106193	0.498681	0.62404	0.233672	0.179913	0.414847	0.8892	0.4347	0.8314	0.8583	-0.3369	-0.2556	0.4428	0.0468	0.7578	0.2932	0.2462	0.3666	0.1039	0.0431	0.1795
A4FVK4_K138k_1_1_138_138	A4FVK4	A4FVK4	A4FVK4_K138k_1_1_138_138	K138k	DRGEkLALEYGIK	0	-0.1761	0.466559	0.668493	-0.33345	0.209959	0.555141	0.106193	0.498681	0.62404	0.233672	0.179913	0.414847	0.6984	0.6824	0.5566	0.4069	-0.1043	-0.5084	0.1591	1.2132	0.3876	1.101	0.3469	0.15	0.0987	0.1074	0.3729
A4IG09_K379k_1_1_379_379	A4IG09	A4IG09|B0S5N0	ftr83	K379k	SMkADDVDMYK	0	-0.652575	0.0482076	0.1909	-0.274475	0.415605	0.737152	-0.669093	0.00452901	0.02502	-0.11892	0.581748	0.787594	-0.8979	-0.1816	-0.0435	-0.4131	0.6362	0.7241	-0.6568	0.5354	0.4819	0.1453	-0.0884	0.27	0.3343	0.8035	0.6281
A4IG09_K387k_1_1_387_387	A4IG09	A4IG09|B0S5N0	ftr83	K387k	ADDVDMYkSLSSAPR	0	-0.0443	0.873022	0.937734	-0.3956	0.168026	0.503617	-0.669093	0.00452901	0.02502	-0.11892	0.581748	0.787594	-0.4092	0.065	0.3429	-0.2719	0.2551	-0.2773	-0.0687	0.2408	0.2177	-0.5305	NA	0.1061	0.2034	0.6716	0.4801
A4IG09_K518k_1_1_518_518	A4IG09	A4IG09	ftr83	K518k	DQLEIkAPYSSR	0	0.916625	0.00248193	0.0339954	0.0336833	0.903514	0.980717	-0.669093	0.00452901	0.02502	-0.11892	0.581748	0.787594	0.3969	0.2909	0.3832	0.8109	0.3196	0.3463	0.2357	-0.0171	-0.1875	-0.2697	-1.3103	0.3138	0.2116	0.1884	0.3536
A4IG19_K618k_1_1_618_618	A4IG19	F1R5X0|E7F2Z5|F8W5B8|A4IG19	pygb	K618k	AAPGYHMAkMIIK	0	NA	NA	NA	0.30455	0.675812	0.894669	-2.09436	6.68649e-09	1.26992e-05	-0.0477626	0.78203	0.904238	NA	NA	NA	NA	NA	1.1197	-0.9502	NA	NA	NA	NA	NA	-0.0323	NA	-0.4073
A4QN90_K38k_1_1_38_38	A4QN90	E7F225|A4QN90	A4QN90_K38k_1_1_38_38	K38k	AGPGVGELIVkAVSASK	0	-0.3718	0.491007	0.687097	-0.254567	0.615283	0.865364	0.519788	0.0908518	0.189036	0.912276	0.0109766	0.0773698	0.2343	-1.3967	-0.2767	0.1085	0.3643	-0.4126	0.9034	NA	NA	-0.0221	0.1004	NA	-0.3279	0.8382	1.1085
A4QN90_K56k_1_1_56_56	A4QN90	E7F225|A4QN90	A4QN90_K56k_1_1_56_56	K56k	kALAASGYDVEK	0	0.38885	0.19655	0.400904	-0.0855	0.787	0.940882	0.519788	0.0908518	0.189036	0.912276	0.0109766	0.0773698	0.635	0.1026	0.6548	0.5559	0.355	-0.1825	0.1905	0.004	0.1954	0.5409	-0.3474	-0.629	0.3922	0.3406	0.7222
A4QN90_K82k_1_1_82_82	A4QN90	E7F225|A4QN90	A4QN90_K82k_1_1_82_82	M79m K82k	GmVTkGVLK	0	-0.100775	0.795624	0.894679	0.116975	0.733421	0.916121	0.519788	0.0908518	0.189036	0.912276	0.0109766	0.0773698	0.163	0.9297	-0.2692	0.5236	0.5376	-0.4747	-0.2558	0.5453	0.3298	NA	NA	0.3328	-0.3646	-0.1307	-0.5626
A4QNV2_K83k_1_1_83_83	A4QNV2	A4QNV2	jph2	K83k	GHWIYkGEWTHGFK	0	-0.111175	0.736446	0.860611	0.4769	0.193321	0.532675	0.470157	0.0579772	0.13936	0.284532	0.264655	0.516521	0.4198	0.8261	0.1688	0.4489	0.7652	-0.0521	0.2031	0.7175	0.5416	0.921	0.1282	0.7785	-0.0173	-0.6509	-0.7963
A4QNV2_K91k_1_1_91_91	A4QNV2	A0A0R4IT36|A4QNV2	jph2	K91k	GEWTHGFkGR	0	0.4704	0.292845	0.50277	0.4797	0.319679	0.662842	0.470157	0.0579772	0.13936	0.284532	0.264655	0.516521	0.0721	-0.154	0.2205	0.2015	0.9285	0.1516	0.8882	0.1989	0.5193	-0.3193	-1.9404	0.7667	0.4761	-0.3571	-0.1801
A4VAK4_K130k_1_1_130_130	A4VAK4	K7DYC3|A4VAK4	hspb1	K130k	DGVLEITGkHEER	0	0.1464	0.636045	0.788671	0.0926667	0.780998	0.938409	2.09843	1.26212e-05	0.000825189	0.822641	0.0274938	0.134833	-0.1507	0.2031	0.1373	-0.1132	0.293	0.2572	0.5621	0.4623	-0.0362	0.2111	-1.1463	0.6891	0.1065	-0.1344	0.4512
A5A4L9_K505k_1_1_505_505	A5A4L9	A5A4L9	supt16h	K505k	GGQQIQkVR	0	-1.0359	0.0256417	0.131738	-0.357467	0.294695	0.643629	0.0589942	0.589274	0.703238	0.20507	0.0984316	0.29303	NA	-0.3346	0.0178	NA	0.1382	-0.7501	-0.8696	0.8707	0.8843	NA	NA	NA	-0.3926	0.2156	-0.2321
A5D6S6_K67k_1_1_67_67	A5D6S6	A5D6S6	polr2l	K67k	LLNYAPLEk	0	0.055775	0.892512	0.950155	-0.624617	0.103594	0.403218	0.0827416	0.645557	0.748058	-0.0786012	0.685547	0.852077	-0.7366	-0.0678	0.7759	-0.1598	-0.755	-0.4791	-0.0234	-0.3894	0.1837	NA	NA	-0.1901	0.7179	-0.0927	0.3867
A5JV83_K124k_1_1_124_124	A5JV83	A5JV83|A0A0R4I9A8	hspb11	K124k	KQDDGkGSYSYR	0	0.5367	0.0916109	0.26648	1.15662	0.00263353	0.055947	1.6526	0.000881584	0.00904276	0.57952	0.18579	0.42271	0.6096	0.6542	0.1475	0.7078	0.5792	0.0058	1.2446	0.3359	0.3803	-0.7607	0.0168	-0.4626	-0.7229	-0.7407	-0.2608
A5PLC8_K15k_1_1_15_15	A5PLC8	A5PLC8	ptmab	K15k	VDSATEISAkDLK	0	-0.23685	0.293159	0.50277	-0.278983	0.253281	0.603957	-0.325637	0.182125	0.305162	0.52116	0.057106	0.214905	-0.2354	-0.95	-0.4724	-0.308	0.5253	0.4977	-0.0502	-0.1108	-0.0987	-0.5722	-0.2367	0.5402	0.7829	0.5764	0.5135
A5PLC8_K26k_1_1_26_26	A5PLC8	A5PLC8	ptmab	K26k	LIEEkENGK	0	-0.696525	0.0256223	0.131738	-0.1955	0.529634	0.811702	-0.325637	0.182125	0.305162	0.52116	0.057106	0.214905	-0.8658	-1.2015	-0.5909	-0.9524	0.4966	0.4939	-0.6188	0.049	-0.1027	-0.2628	-0.508	0.6683	0.6618	-0.0851	0.0326
A5PLC8_K5k_1_1_5_5	A5PLC8	A5PLC8	ptmab	K5k	ADAkVDSATEISAK	0	-0.319467	0.345709	0.561192	0.2115	0.500831	0.795457	-0.325637	0.182125	0.305162	0.52116	0.057106	0.214905	-0.5169	NA	0.276	-0.3302	0.1357	0.8062	0.1279	-0.4176	0.417	0.3879	NA	0.0054	0.3374	0.4541	-0.2165
A5PMJ7_K46k_1_1_46_46	A5PMJ7	A5PMJ7	stx12	K46k	GLVNQLGTkLDTSGLR	0	-0.10625	0.595271	0.759764	-0.100908	0.640078	0.878725	-0.0689406	0.605934	0.716148	0.0397344	0.78229	0.904238	-0.0952	0.3314	0.214	0.2605	0.1371	0.1711	0.1306	0.5706	0.3976	0.3561	-0.1886	0.3106	0.2829	0.1797	0.2155
A5PMM5_K165k_1_1_165_165	A5PMM5	A5PMM5	snx18a	K165k	GAQQAkSSATVSR	0	-0.469933	0.159139	0.358229	0.348567	0.236412	0.588162	0.168127	0.181865	0.304939	0.0567888	0.666233	0.841323	-0.4973	0.0294	0.3196	NA	0.1239	0.2049	0.3028	NA	0.1509	0.6901	NA	-0.235	0.0775	NA	-0.2566
A5PMM5_K556k_1_1_556_556	A5PMM5	A5PMM5	snx18a	K556k	VTGkLEEALQK	0	-0.174625	0.761759	0.876386	-0.292625	0.461417	0.769977	0.168127	0.181865	0.304939	0.0567888	0.666233	0.841323	-0.2931	-1.4225	-0.4288	-0.9009	-0.1107	0.1654	-0.4402	NA	NA	-0.5867	NA	0.4635	0.9647	-0.5352	-0.2365
A5PMP0_K399k_1_1_399_399	A5PMP0	A5PMP0	capn2b	K399k	EkGCSFVVGLIQK	0	1.39958	0.000165041	0.00702044	-0.100025	0.746772	0.92317	0.414524	0.0276391	0.0835895	-0.225998	0.232291	0.477922	0.068	-0.295	-0.1651	0.1626	0.5414	0.2213	0.5138	-1.1214	-1.0492	-1.174	-2.4832	0.3151	0.5313	0.5794	0.6763
A5PMP0_K455k_1_1_455_455	A5PMP0	A5PMP0	capn2b	K455k	NFFLTHGQkAR	0	-0.425725	0.056709	0.208108	0.165625	0.468743	0.775137	0.414524	0.0276391	0.0835895	-0.225998	0.232291	0.477922	-0.2276	0.2754	-0.4616	-0.1695	0.3338	0.3943	0.4479	0.1861	0.0248	0.4064	0.5023	0.3098	-0.0044	0.1157	0.4844
A5PMP0_K84k_1_1_84_84	A5PMP0	A5PMP0	capn2b	K84k	RPGELCQkPR	0	-0.54775	0.0698829	0.230958	0.342433	0.240182	0.591967	0.414524	0.0276391	0.0835895	-0.225998	0.232291	0.477922	0.0577	-0.6082	-0.5427	-0.4414	0.4723	0.4723	0.4277	0.6637	-0.3597	0.1883	NA	0.5266	-0.3013	0.2298	0.0049
A5PMP8_K1470k_1_1_1470_1470	A5PMP8	A5PMP8	c3b.2	K1470k	LNQRFkVGLLQPSTVK	0	-0.659017	0.238394	0.452927	-0.476242	0.304953	0.650567	0.0102275	0.959618	0.973744	0.0653606	0.764902	0.895044	0.8506	-0.6858	0.1896	NA	-0.4615	-0.8625	-0.3001	0.7519	0.8024	NA	NA	-0.6385	-0.9005	0.6761	0.6024
A5PMV7_K188k_1_1_188_188	A5PMV7	A5PMV7|Q642H5	ppp2r1ba	K188k	AAASkLGEFAK	0	0.309475	0.11189	0.295383	0.285442	0.169803	0.505646	0.471355	0.00148324	0.012559	0.195817	0.145894	0.368864	0.1634	0.4402	0.147	0.444	0.5716	0.1892	0.6122	-0.0513	0.0934	0.0823	-0.1677	0.2422	0.0936	0.3355	0.0176
A5PMV7_K255k_1_1_255_255	A5PMV7	A5PMV7|Q642H5	ppp2r1ba	K255k	QAAEDkSWR	0	0.176225	0.53864	0.7194	-0.058975	0.84804	0.956573	0.471355	0.00148324	0.012559	0.195817	0.145894	0.368864	0.5393	0.3336	0.5256	0.2995	-0.2242	-0.2976	0.5287	0.655	0.6218	0.3121	-0.5958	0.0693	0.3772	-0.0222	-0.1792
A5PMV7_K266k_1_1_266_266	A5PMV7	A5PMV7	ppp2r1ba	K266k	YMVADkFSDLQK	0	0.4945	0.171213	0.373384	-0.101658	0.788216	0.940882	0.471355	0.00148324	0.012559	0.195817	0.145894	0.368864	0.3758	-0.6045	0.5775	0.0777	0.2675	-0.0232	0.2218	-0.4366	0.4017	-0.2204	-1.2962	0.1594	-0.107	0.1125	0.8632
A5PMV7_K280k_1_1_280_280	A5PMV7	A5PMV7|Q642H5	ppp2r1ba	K280k	AVGPEITkNDLVPAFQNLLK	0	-0.576092	0.123595	0.310395	-0.5257	0.15709	0.488302	0.471355	0.00148324	0.012559	0.195817	0.145894	0.368864	0.4789	-0.8723	-0.2471	0.2184	0.3053	-0.5707	-0.2653	0.2488	0.3341	0.8288	NA	-0.2903	0.3654	0.5512	0.7689
A5PMV7_K33k_1_1_33_33	A5PMV7	A5PMV7|Q642H5	ppp2r1ba	K33k	LNSIkK	0	0.463425	0.123695	0.310395	1.26669	0.000887895	0.0300977	0.471355	0.00148324	0.012559	0.195817	0.145894	0.368864	0.0949	0.8921	-0.0967	0.5289	0.1593	0.6202	0.103	0.2005	0.3711	-0.7819	-0.2242	-1.1762	-1.187	-0.7215	-0.8054
A5PMZ3_K341k_1_1_341_341	A5PMZ3	A5PMZ3	scinlb	K341k	QFFSDWkDK	0	-0.996775	0.0109917	0.0797501	0.177692	0.639308	0.878725	-0.358127	0.210923	0.33737	-0.590718	0.0658429	0.23299	-0.8309	-1.8635	-0.7989	-1.8245	0.2191	1.0951	-0.0183	-0.2503	-1.1268	0.0298	0.0166	0.4703	0.1487	-0.0761	0.4742
A5PMZ3_K351k_1_1_351_351	A5PMZ3	A5PMZ3	scinlb	K351k	YQTTGPTkAYTIGK	0	-0.5924	0.024778	0.129499	-0.299983	0.260655	0.611587	-0.358127	0.210923	0.33737	-0.590718	0.0658429	0.23299	-0.9942	-1.5626	-1.4683	-1.4782	0.2557	0.4225	0.1107	-0.9603	-0.9187	-0.404	-0.8507	-0.027	0.9168	0.5371	0.8249
A5PMZ3_K503k_1_1_503_503	A5PMZ3	A5PMZ3	scinlb	K503k	KDGQTkPAATR	0	-0.856625	0.0854227	0.256009	0.980608	0.0699114	0.339356	-0.358127	0.210923	0.33737	-0.590718	0.0658429	0.23299	-0.2043	-0.4729	-1.0288	-1.7498	0.7376	1.1221	0.5599	-1.1164	0.2304	0.039	0.8177	-1.4552	0.0008	0.3662	0.3919
A5WV16_K48k_1_1_48_48	A5WV16	A5WV16	acsl4b	K48k	LFVHAVkSFNQAPCLGTR	0	0.3839	0.250275	0.463308	0.2668	0.453574	0.765144	0.283499	0.305937	0.44177	-0.272886	0.359535	0.608436	-0.481	0.1993	0.4765	0.2637	0.439	0.7716	0.2399	-1.1982	-0.2927	-0.0698	0.4836	-0.162	0.1653	0.5478	0.3157
A5WV25_K41k_1_1_41_41	A5WV25	A0A286YBG3|A5WV25	mpp1	K41k	SEkAAMQTYECK	0	0.387575	0.290848	0.501156	-0.0257	0.947305	0.989668	-0.116826	0.459263	0.588907	-0.227332	0.192812	0.431412	0.0248	0.3332	0.6963	1.1081	-0.0866	0.4613	0.1239	-0.5858	-0.0796	0.3774	0.9001	-0.0982	0.9592	0.3164	-0.4098
A5WVI9_K160k_1_1_160_160	A5WVI9	A0A2R8QPX2|A5WVI9	dnaja2b	K160k	TGAVQkCSTCR	0	-0.4384	0.42952	0.632842	0.0836917	0.806138	0.945267	-0.345096	0.00675872	0.0327205	-0.20975	0.0930646	0.282841	-0.112	NA	0.2856	NA	-0.7904	0.4631	-0.0361	NA	NA	0.5252	NA	-0.0143	-0.2455	-0.6457	0.0862
A5WVN8_K235k_1_1_235_235	A5WVN8	A5WVN8	si:dkey-238o13.4	K235k	NTSHTVFPVSCPADLkTVILEDNL	0	NA	NA	NA	-0.223333	0.68197	0.89787	-0.366298	0.349168	0.48445	0.265738	0.525501	0.746366	NA	NA	NA	NA	NA	-0.4938	NA	NA	NA	NA	NA	NA	0.3099	-0.4884	-0.6329
A5WW31_K19k_1_1_19_19	A5WW31	A5WW31|F6P9F0|E7FAE7	s100u	K19k	GkENLGGK	0	0.3072	0.219125	0.428714	0.304042	0.258252	0.609911	0.34342	0.116923	0.225318	0.558891	0.0252089	0.128813	0.4428	0.0524	0.0782	0.001	0.0918	0.3872	0.0684	0.2988	-0.2607	-0.5524	-0.1401	-0.6067	-0.257	0.1175	0.2599
A5WW31_K208k_1_1_208_208	A5WW31	A5WW31	s100u	K208k	KVEANQAVEkK	0	-0.307183	0.199782	0.404595	-0.296567	0.214866	0.561195	0.34342	0.116923	0.225318	0.558891	0.0252089	0.128813	-1.0923	-1.0448	-1.4882	-0.9485	0.2974	-0.0876	0.0636	-0.4599	-0.9155	-1.1334	NA	0.4562	0.5579	0.2931	0.2436
A5WW31_K25k_1_1_25_25	A5WW31	A5WW31|F6P9F0	s100u	K25k	ENLGGkEFQSLVK	0	-0.431042	0.191646	0.395695	-0.135475	0.672929	0.89411	0.34342	0.116923	0.225318	0.558891	0.0252089	0.128813	-0.0721	-0.4203	-0.4908	-0.3515	0.6262	0.0154	-0.4091	0.2005	0.3626	-0.271	NA	0.9757	0.0792	-0.1818	-0.0212
A6H8Q3_K180k_1_1_180_180	A6H8Q3	A0A0R4IJS3|A0A0R4IYH8|A8KBU7|A6H8Q3|A1L142	mybphb	K180k	YVIkNQTTGDRLNIR	0	-0.258275	0.334619	0.550646	-0.047825	0.866594	0.965545	-0.652356	0.0106172	0.0435821	-1.31485	9.48404e-05	0.00432098	0.1178	0.1259	-0.1557	0.2094	0.1191	0.0822	-0.0159	0.5593	0.5353	0.8187	-0.5828	0.2794	-0.0368	0.0342	0.1617
A6H8Q3_K416k_1_1_416_416	A6H8Q3	A8KBU7|A6H8Q3	mybphb	K416k	TGIDYkPPVYK	0	0.5357	0.0647896	0.224241	0.250692	0.401617	0.730402	-0.652356	0.0106172	0.0435821	-1.31485	9.48404e-05	0.00432098	0.0443	0.3251	0.1747	0.3716	0.3253	0.3677	0.2612	-0.1357	0.0927	-0.9939	-0.1902	0.5606	0.2911	0.0001	-0.5823
A6H8Q3_K421k_1_1_421_421	A6H8Q3	A8KBU7|A6H8Q3	mybphb	K421k	TGIDYKPPVYkEHDFSEAPK	0	0.64895	0.0276136	0.138036	0.270775	0.361155	0.701525	-0.652356	0.0106172	0.0435821	-1.31485	9.48404e-05	0.00432098	-0.1604	0.0472	-0.1161	0.34	0.2958	0.4721	0.5065	-0.4428	-0.4233	-0.53	-1.089	0.8433	0.2454	0.0439	-0.5165
A6H8Q3_K464k_1_1_464_464	A6H8Q3	A8KBU7|A6H8Q3|Q6NW94|Q6GMJ2	mybphb	K464k	IEWLkNQMIIGDDPK	0	-0.441125	0.0630867	0.220076	-0.35045	0.160582	0.495335	-0.652356	0.0106172	0.0435821	-1.31485	9.48404e-05	0.00432098	-0.0172	0.1509	0.2298	0.2424	-0.2921	0.3243	-0.22	0.1392	0.433	0.8541	0.9441	0.1571	0.3107	0.4582	0.2254
A6H8Q3_K490k_1_1_490_490	A6H8Q3	A8KBU7|A6H8Q3	mybphb	K490k	kPGNFDGGVYSCR	0	1.41295	0.000222312	0.00853852	0.804658	0.0225556	0.189145	-0.652356	0.0106172	0.0435821	-1.31485	9.48404e-05	0.00432098	0.9056	0.658	1.2556	0.8943	0.1657	0.3927	0.3447	-0.7561	0.156	-0.3244	-1.0138	-1.2425	-0.5732	-0.0702	-0.1286
A6H8Q3_K504k_1_1_504_504	A6H8Q3	A8KBU7|A6H8Q3	mybphb	K504k	AkNEHGEAVVTCK	0	2.67115	0.000109307	0.00584347	-0.369467	0.53544	0.815916	-0.652356	0.0106172	0.0435821	-1.31485	9.48404e-05	0.00432098	0.7483	0.0803	1.0825	0.8612	-1.0901	0.5496	0.5946	-2.6518	-2.968	-1.9108	-0.3817	NA	0.3163	0.555	0.2912
A6H8Q3_K529k_1_1_529_529	A6H8Q3	A8KBU7|A6H8Q3	mybphb	K529k	QPVIADADKk	0	0.16645	0.545448	0.723364	-0.488875	0.113165	0.419811	-0.652356	0.0106172	0.0435821	-1.31485	9.48404e-05	0.00432098	0.0741	0.2707	0.4857	0.4186	-0.2047	-0.3072	-0.1607	0.2082	0.4628	-0.3464	0.2587	0.8271	0.4317	0.341	-0.5411
A6NA21_K106k_1_1_106_106	A6NA21	A6NA21	cavin1b	K106k	SVTGIQGELTkLSK	0	-0.505075	0.107124	0.289372	-0.110858	0.73253	0.916098	0.265068	0.0184101	0.0634362	-0.090974	0.406774	0.652836	0.0655	-0.8785	0.1067	-0.252	-0.0116	-0.4495	0.7478	0.5524	0.2086	0.4305	-0.1295	0.2529	-0.0463	-0.003	0.6221
A6NA21_K109k_1_1_109_109	A6NA21	A6NA21|A3KP36	cavin1b	K109k	LSkSHTTTANTVNK	0	-0.1874	0.566279	0.738998	0.4187	0.243792	0.593399	0.265068	0.0184101	0.0634362	-0.090974	0.406774	0.652836	0.2392	0.2397	0.3143	0.3694	0.3698	-0.0743	0.7299	-0.0486	0.1272	0.8686	0.965	-1	0.0001	0.2377	0.4546
A6NA21_K120k_1_1_120_120	A6NA21	A6NA21|A3KP36	cavin1b	K120k	SHTTTANTVNkMLEK	0	0.022675	0.946093	0.976657	-0.347667	0.344504	0.687693	0.265068	0.0184101	0.0634362	-0.090974	0.406774	0.652836	-0.4648	0.4068	0.3243	0.0974	-0.1549	-0.025	-0.3357	0.0706	0.3218	-0.3083	0.1889	-0.8742	0.3271	0.2345	1.0158
A6NA21_K133k_1_1_133_133	A6NA21	A6NA21|A3KP36	cavin1b	K133k	VSVNVkSVR	0	0.44705	0.0870548	0.257969	0.22525	0.4066	0.73342	0.265068	0.0184101	0.0634362	-0.090974	0.406774	0.652836	0.2734	0.2961	0.4378	1.064	0.1672	0.0396	0.3986	-0.4234	0.0247	0.6262	0.0556	-0.1	0.1405	-0.1501	0.0158
A6NA21_K141k_1_1_141_141	A6NA21	A6NA21|A3KP36	cavin1b	K141k	GNLEkQAGQIK	0	0.119225	0.67724	0.817565	-0.156042	0.614499	0.865003	0.265068	0.0184101	0.0634362	-0.090974	0.406774	0.652836	-0.1527	-0.1918	-0.191	-0.701	0.3021	-0.3471	0.4195	-1.0717	-0.2163	0.2049	-0.6303	-0.0425	0.3322	0.2245	0.6093
A6NA21_K141kK147k_2_2_141_147	A6NA21	A6NA21|A3KP36	cavin1b	K141k K147k	GNLEkQAGQIkR	0	-1.18308	0.00174648	0.0280857	-0.454292	0.197221	0.53581	0.265068	0.0184101	0.0634362	-0.090974	0.406774	0.652836	-0.1196	0.8564	0.4526	-0.5457	-0.3597	-0.7027	-0.397	1.0797	1.1098	1.058	2.1285	0.1452	0.0298	0.0868	-0.3905
A6NA21_K158k_1_1_158_158	A6NA21	A6NA21|A3KP36	cavin1b	K158k	LESNENELLkR	0	-0.22565	0.278496	0.48663	0.0627083	0.776332	0.935167	0.265068	0.0184101	0.0634362	-0.090974	0.406774	0.652836	0.1049	0.1701	0.0482	0.2716	-0.1385	-0.3706	-0.0047	0.7404	0.3209	0.2307	0.2054	0.1205	-0.1693	-0.4641	-0.423
A6NA21_K163k_1_1_163_163	A6NA21	A6NA21	cavin1b	K163k	NFkVMIYQDEVK	0	-0.17665	0.425601	0.629883	-0.0568583	0.810501	0.947374	0.265068	0.0184101	0.0634362	-0.090974	0.406774	0.652836	-0.2633	-0.349	-0.4663	-0.5179	0.2116	0.3224	0.6197	-0.6577	-0.1829	0.0945	-0.1438	0.1527	0.6763	0.2205	0.7162
A6NA21_K172k_1_1_172_172	A6NA21	A6NA21	cavin1b	K172k	VMIYQDEVkVGSK	0	-0.334225	0.105448	0.287097	-0.296475	0.177539	0.516119	0.265068	0.0184101	0.0634362	-0.090974	0.406774	0.652836	-0.5648	-0.2454	-0.4483	-0.0471	0.2222	-0.1353	0.2878	-0.0519	-0.1503	0.1218	0.1117	0.4314	0.6847	0.318	0.2514
A6NA21_K176k_1_1_176_176	A6NA21	A6NA21	cavin1b	K176k	VGSkVNVAK	0	0.3687	0.468981	0.670021	-0.21245	0.697439	0.900975	0.265068	0.0184101	0.0634362	-0.090974	0.406774	0.652836	0.2908	-0.4837	0.0252	-0.3523	0.3978	-1.1066	0.8426	0.6527	0.3173	-1.5714	-1.3934	0.1136	-0.1292	0.545	0.4988
A6NA21_K181k_1_1_181_181	A6NA21	A6NA21	cavin1b	K181k	VNVAkSMKYPEPVEGEAEGELK	0	-1.16968	0.0104925	0.0781111	0.200817	0.649091	0.883905	0.265068	0.0184101	0.0634362	-0.090974	0.406774	0.652836	0.9803	2.0894	1.3721	0.5049	-2.7101	-1.8872	-2.5695	1.8515	1.7976	2.8321	3.1442	-1.8295	-3.1095	-2.4779	-2.9421
A6NA21_K184k_1_1_184_184	A6NA21	A6NA21	cavin1b	K184k	SMkYPEPVEGEAEGELK	0	-0.7886	0.0120971	0.0844022	-0.23335	0.446909	0.761626	0.265068	0.0184101	0.0634362	-0.090974	0.406774	0.652836	-0.2873	-0.4279	-0.2189	-0.2349	0.2954	-1.0164	0.5104	0.5992	0.3561	0.5454	0.4847	0.3892	-0.1225	0.0637	0.3222
A6NA21_K253k_1_1_253_253	A6NA21	A6NA21	cavin1b	K253k	TVFSkGNMEK	0	-0.5525	0.0262114	0.133404	-0.3734	0.143796	0.469831	0.265068	0.0184101	0.0634362	-0.090974	0.406774	0.652836	0.18	0.0782	-0.0434	0.5253	-0.1724	-0.1982	-0.1784	0.4729	0.2924	1.0529	1.1319	0.2926	0.3453	-0.063	0.1867
A6NA21_K264k_1_1_264_264	A6NA21	E7F0K3|A6NA21	cavin1b	K264k	TkENLEK	0	1.5983	0.00104798	0.02058	0.770783	0.0909378	0.381975	0.265068	0.0184101	0.0634362	-0.090974	0.406774	0.652836	0.1154	0.1324	-0.0277	0.3677	0.4686	0.1936	0.7008	-0.8452	-1.047	-2.3088	-1.6044	-1.4879	-0.5355	0.6133	0.1443
A6NA21_K269k_1_1_269_269	A6NA21	E7F0K3|A6NA21	cavin1b	K269k	ENLEkTK	0	0.485225	0.32679	0.542275	0.261633	0.435429	0.752429	0.265068	0.0184101	0.0634362	-0.090974	0.406774	0.652836	-0.218	-0.6296	-0.1132	-0.4267	0.1632	-0.6269	0.6108	NA	-0.8321	NA	NA	-0.4965	-0.6017	-0.0531	0.3009
A6NA21_K280k_1_1_280_280	A6NA21	E7F0K3|A6NA21	cavin1b	K280k	ENLEkTR	0	0.093825	0.825156	0.913614	0.162692	0.702174	0.903242	0.265068	0.0184101	0.0634362	-0.090974	0.406774	0.652836	0.1374	-0.6735	0.6286	0.1868	0.5813	-0.253	0.0265	-0.2612	0.0941	0.0951	NA	-1.1991	-0.1252	0.4157	0.7309
A6NA21_K348k_1_1_348_348	A6NA21	A6NA21	cavin1b	K348k	VMkSFTPDHTIYAR	0	0.612975	0.159239	0.358229	-0.0581583	0.898224	0.978122	0.265068	0.0184101	0.0634362	-0.090974	0.406774	0.652836	-0.012	0.4343	0.3686	0.6737	0.1665	0.5019	0.0557	-1.9008	-0.1826	0.6469	0.4492	0.2856	0.4601	0.0774	0.375
A6NA21_K366k_1_1_366_366	A6NA21	A6NA21	cavin1b	K366k	TAVYkVPPFTFHVK	0	0.311125	0.266729	0.479192	-0.195225	0.512984	0.802698	0.265068	0.0184101	0.0634362	-0.090974	0.406774	0.652836	0.1307	-0.0976	0.1599	0.2841	0.3207	0.0721	0.2591	-1.1583	-0.0965	0.1355	0.3519	0.4382	0.446	0.2789	0.487
A7E2K4_K41k_1_1_41_41	A7E2K4	A7E2K4	rplp2l	K41k	MSkVVAELNGK	0	-0.343	0.376912	0.587728	-0.334683	0.423625	0.743137	-0.756389	0.0145368	0.0539726	0.0797286	0.78727	0.905411	-0.452	0.0408	-0.1057	-0.1768	-0.1329	1.233	-0.877	-0.3911	0.4838	0.4369	0.1487	0.6619	0.7708	0.4757	-0.2722
A7MCL7_K43k_1_1_43_43	A7MCL7	A7MCL7|E7EYW5	cst14a.2	K43k	KFDVFTAkSFK	0	-0.262925	0.243051	0.457396	0.076725	0.747237	0.923472	0.340244	0.237837	0.367781	0.270823	0.37836	0.624318	0.4888	0.7231	0.5703	0.5692	0.0751	0.0953	0.0588	0.3711	0.6408	1.043	1.3482	0.1253	0.1679	-0.254	-0.0405
A7MCR5_K218k_1_1_218_218	A7MCR5	E9QDP2|A7MCR5	rfc3	K218k	QIAEkSGR	0	-0.462175	0.275452	0.485385	-0.107967	0.781937	0.938691	-0.100169	0.693308	0.785711	0.284597	0.308244	0.562545	0.1693	-0.7544	0.2356	0.456	0.1168	-0.3802	-0.4939	NA	-0.0791	NA	1.0567	NA	-0.5105	0.0987	-0.0216
A7YT51_K218k_1_1_218_218	A7YT51	A7YT51	sf3b2	K218k	ILQLkEMR	0	-0.414325	0.196601	0.400904	-0.05415	0.872314	0.966934	0.374506	0.238831	0.368622	0.136664	0.68329	0.850719	-0.2867	-0.2443	-0.1403	-0.4079	0.5021	0.5961	0.1279	0.1377	-0.2036	0.9076	-0.2636	0.5857	1.1957	-0.2604	0.3304
A7YT51_K468k_1_1_468_468	A7YT51	A7YT51	sf3b2	K468k	EALQEkEDAK	0	0.51015	0.239884	0.453751	-0.0308333	0.941919	0.989668	0.374506	0.238831	0.368622	0.136664	0.68329	0.850719	0.2081	-0.217	-0.9933	0.2688	0.1495	0.0021	0.0406	-0.7443	-0.317	-1.0192	NA	0.5879	0.9308	-0.9914	-0.1477
A7YY10_K44k_1_1_44_44	A7YY10	A7YY10	A7YY10_K44k_1_1_44_44	K44k	YTCSFCGkTK	0	0.718133	0.107261	0.289443	-0.4862	0.263484	0.613827	0.186545	0.365804	0.500848	0.414533	0.0762022	0.255796	0.4796	0.6999	0.2039	0.5902	0.2258	0.7651	-1.4826	0.0636	-0.1203	-0.6175	NA	0.3787	0.6078	0.4761	-0.1734
A8CYR1_K696k_1_1_696_696	A8CYR1	A0A0R4IRB1|F1QQP6|A0A0J9YJN1|Q1LWX7|A8CYR1	A8CYR1_K696k_1_1_696_696	K696k	QLSLDINRLPGEkLGR	0	0.182375	0.495568	0.6904	-0.000475	0.998678	0.999608	0.0706775	0.533602	0.655299	0.234891	0.0710453	0.24508	0.2237	0.6036	0.2273	-0.0085	0.5563	-0.1597	0.0279	0.6183	0.4188	-0.5354	-0.1851	0.0903	0.0522	0.2147	0.2107
A8DZA0_K756k_1_1_756_756	A8DZA0	A8DZA0	rbm25b	K756k	PELFNYPLDWSVVDTALMEkR	0	0.800308	0.0831069	0.251692	0.833483	0.0723283	0.342191	-0.170933	0.0962982	0.197326	-0.209503	0.0629025	0.226757	1.0349	0.8228	0.4038	0.7132	0.0308	0.4158	0.506	-0.0734	-0.4341	0.3376	NA	-1.7968	-0.8673	0.288	0.3123
A8DZE4_K14k_1_1_14_14	A8DZE4	A8DZE4	gpib	K14k	GLTSDPNFQNLEkWYK	0	-0.0873	0.900698	0.953482	-0.536525	0.260338	0.611587	0.591438	0.0364624	0.101423	-0.033935	0.90319	0.960366	-0.3743	NA	0.7435	-0.1217	-0.0675	-1.0538	-0.7081	NA	0.1698	NA	NA	-0.7202	-0.7251	0.1907	0.9615
A8DZE4_K366k_1_1_366_366	A8DZE4	A8DZE4	gpib	K366k	YITTkGTR	0	-0.178575	0.507913	0.699375	0.220142	0.358579	0.700409	0.591438	0.0364624	0.101423	-0.033935	0.90319	0.960366	0.3225	0.1717	-0.2311	-0.1242	0.1268	-0.3048	0.2862	0.0063	0.4203	NA	NA	-0.1272	-0.2871	-0.1422	-0.1798
A8DZE4_K437k_1_1_437_437	A8DZE4	A8DZE4	gpib	K437k	ILLANFLAQTEALMkGK	0	NA	NA	NA	0.39525	0.390933	0.723208	0.591438	0.0364624	0.101423	-0.033935	0.90319	0.960366	-0.4229	NA	0.0983	NA	NA	0.035	-0.3475	NA	NA	NA	NA	NA	-1.1439	-0.6993	0.1887
A8DZE4_K465k_1_1_465_465	A8DZE4	A8DZE4	gpib	K465k	ILPHkVFQGNKPTNSIVFK	0	0.324717	0.184596	0.386954	0.0462833	0.845221	0.956096	0.591438	0.0364624	0.101423	-0.033935	0.90319	0.960366	0.2086	0.0564	-0.3176	-0.5484	0.3002	0.0717	0.5627	-0.6153	-0.2897	-0.5199	NA	0.2483	0.3851	0.075	0.3526
A8DZE4_K64k_1_1_64_64	A8DZE4	A8DZE4	gpib	K64k	NLINEEVkK	0	0.501967	0.379989	0.590199	0.0851917	0.879931	0.968663	0.591438	0.0364624	0.101423	-0.033935	0.90319	0.960366	0.4075	0.5726	-0.2919	-0.7926	0.0936	0.3999	-0.0217	0.9395	-0.2512	-2.2725	NA	0.2426	0.2201	0.0007	-0.1751
A8E526_K46k_1_1_46_46	A8E526	A8E526	rpl14	K46k	ALVDGPCTGVkR	0	0.449425	0.175811	0.378406	-0.0818667	0.813898	0.948161	-0.107838	0.62841	0.735173	0.332045	0.18136	0.417272	0.5342	1.0951	0.389	0.8311	0.0532	-0.0591	0.3078	0.572	0.6677	0.6703	-0.8583	0.6105	-0.0233	0.0225	0.1203
A8E526_K53k_1_1_53_53	A8E526	A8E526	rpl14	K53k	RQALPFkCLQLTDYVIK	0	0.867767	0.0991692	0.277057	-0.769583	0.139629	0.463879	-0.107838	0.62841	0.735173	0.332045	0.18136	0.417272	0.9767	-0.9076	0.2456	0.5153	-0.5791	-0.1026	-0.1413	0.0886	-1.6673	-0.4021	NA	-0.5209	0.7585	0.9729	0.7705
A8E526_K93k_1_1_93_93	A8E526	A8E526	rpl14	K93k	KWEESSWAkK	0	0.3164	0.251896	0.46521	0.527675	0.0855908	0.370658	-0.107838	0.62841	0.735173	0.332045	0.18136	0.417272	0.7708	0.9122	0.6136	0.8955	0.2107	0.9804	-0.2497	0.6846	0.0777	0.8071	0.3571	-0.3887	0.2216	-0.3055	-0.3829
A8E7N5_K257k_1_1_257_257	A8E7N5	A8E7N5	vps45	K257k	VPGISkDLR	0	-1.09282	0.111926	0.295383	0.0285083	0.965337	0.991969	-0.0244362	0.813592	0.873063	-0.110068	0.334069	0.588261	-0.6129	0.7385	-0.724	-1.7002	0.6969	-1.0264	-0.1831	0.7377	0.3339	0.4829	NA	1.5158	-0.2498	-0.5853	-1.4782
A8E7N5_K450k_1_1_450_450	A8E7N5	A8E7N5	vps45	K450k	GSDLITPTDAVSITkQFFK	0	1.25499	0.000115089	0.00607056	-0.233233	0.363414	0.701827	-0.0244362	0.813592	0.873063	-0.110068	0.334069	0.588261	0.3249	0.2406	0.5382	-0.0092	-0.0596	0.3822	0.0532	-0.7595	-1.3135	-0.8711	NA	NA	0.1769	0.3825	0.5161
A8E7N8_K211k_1_1_211_211	A8E7N8	A8E7N8	psmb4	K211k	CLkVLYYR	0	0.82765	0.00623892	0.0587722	0.283958	0.329089	0.674922	0.60068	0.00426898	0.023938	0.446553	0.0332511	0.152015	0.4945	0.947	0.6211	0.8352	-0.1191	0.7898	-0.0817	-0.6148	-0.0264	0.3115	-0.0831	-0.3451	0.2293	0.0725	-0.3072
A8KBZ9_K267k_1_1_267_267	A8KBZ9	A8KBZ9	xpnpep3	K267k	ITAQAFkK	0	1.40412	0.0826354	0.251273	-0.234208	0.759858	0.928125	0.297638	0.16194	0.282072	0.403566	0.0855271	0.270083	-0.6788	-0.5808	-0.485	-0.4124	0.2706	0.4653	0.4094	-0.5873	-0.4615	-4.7813	NA	0.8932	1.1875	0.2444	0.1388
A8KC22_K463k_1_1_463_463	A8KC22	A0A0R4IB42|F1Q577|F1RC33|A8KC22	hnrnpl2	K463k	NPSNIkIFVAK	0	0.0544	0.785757	0.889908	0.259142	0.241061	0.592633	0.0254914	0.785037	0.851497	0.020426	0.839538	0.929059	-0.0067	0.365	0.4337	0.154	0.2317	0.5043	0.3565	0.3371	0.13	0.1019	0.1594	-0.1131	0.5244	0.0918	-0.083
A8WFT4_K345k_1_1_345_345	A8WFT4	A8WFT4	scly	K345k	LLAVFGkDK	0	0.20035	0.666185	0.810937	0.409392	0.21046	0.555922	-0.501845	0.0129386	0.0499737	-0.1485	0.443706	0.684023	0.3159	0.2624	-0.2172	0.6407	-0.1174	0.3692	0.1927	NA	0.0501	NA	NA	-0.63	0.3077	-0.7444	0.0218
A8WG70_K138k_1_1_138_138	A8WG70	A8WG70	dnajc18	K138k	GASDEDLkK	0	0.3554	0.610412	0.769224	1.12261	0.0322838	0.227451	0.333405	0.0471692	0.120478	-0.033372	0.841965	0.929764	0.3247	0.0792	-0.0045	0.3794	-0.2753	-0.1107	1.191	NA	-0.1607	NA	NA	-1.617	-1.5791	-0.3755	0.1545
A8WGA6_K115k_1_0_114_115	A8WGA6	E9QDI4|A0A1D5NS25|A0A1D5NSE8|E9QEG1|A8WGA6|Q7ZZW4|Q6P0T7|E9QIW4|A0A1D5NSK1|A0A1D5NSI6|B7ZVL6	A8WGA6_K115k_1_0_114_115	K115k	KkEEEELIALK	1	-0.1302	0.756121	0.873092	-0.968042	0.0457552	0.267885	-0.575285	0.0009566	0.009564	-1.19857	1.83488e-06	0.000430924	-1.0966	-1.1118	-0.9648	-1.7906	-0.1579	-0.0748	-0.3009	-1.4693	0.1712	-1.3676	-1.7773	-0.0505	1.3937	1.4444	0.3731
A8WGA6_K124k_1_1_124_124	A8WGA6	A8WGA6|Q7ZZW4|Q6P0T7	A8WGA6_K124k_1_1_124_124	K124k	KKEEEELIALkDR	0	0.233475	0.497822	0.691254	-1.27154	0.00318274	0.0634574	-0.575285	0.0009566	0.009564	-1.19857	1.83488e-06	0.000430924	-0.0675	-0.1895	-0.4186	-0.9061	-0.2842	-0.595	-0.801	-0.7892	0.1466	-0.9265	-0.9465	0.2312	1.6103	0.8212	0.1832
A8WGA6_K175k_1_1_175_175	A8WGA6	E9QIW4|E9QDI4|A0A1D5NS25|A0A1D5NSE8|E9QEG1|A0A1D5NSI6|B7ZVL6|A8WGA6|Q7ZZW4|Q6P0T7	A8WGA6_K175k_1_1_175_175	K175k	kSALSNMGSQYSSYLQK	0	1.3357	0.0424125	0.175506	-0.06185	0.925536	0.986736	-0.575285	0.0009566	0.009564	-1.19857	1.83488e-06	0.000430924	0.7976	-0.3488	1.2841	0.7565	-0.8921	-0.3089	0.478	-1.0931	-0.7273	-0.7619	-0.2711	-2.5527	0.5624	0.6779	0.5958
A8WGA6_K191k_1_1_191_191	A8WGA6	E9QIW4|E9QDI4|A0A1D5NS25|A8WGA6|Q7ZZW4|Q6P0T7	A8WGA6_K191k_1_1_191_191	K191k	SALSNMGSQYSSYLQkADSK	0	1.75685	0.00260253	0.0347988	0.562383	0.302727	0.649126	-0.575285	0.0009566	0.009564	-1.19857	1.83488e-06	0.000430924	1.2303	1.0267	1.3257	1.4492	-0.4909	0.0549	0.3533	-0.9898	-0.8738	-0.2318	0.0999	-2.5597	-0.0149	0.1812	0.0336
A8WGA6_K216k_1_1_216_216	A8WGA6	E9QIW4|A0A1D5NSI6|B7ZVL6|A8WGA6|Q7ZZW4|E9QDI4|A0A1D5NS25|A0A1D5NSE8|E9QEG1|Q6P0T7	A8WGA6_K216k_1_1_216_216	K216k	RkPLNIDHMNEDK	0	1.8544	1.76913e-06	0.000786267	0.134742	0.620273	0.86902	-0.575285	0.0009566	0.009564	-1.19857	1.83488e-06	0.000430924	1.6884	1.3853	1.9741	1.6463	-0.9511	-1.034	0.1274	-0.0313	-0.0692	-0.3177	-0.3053	-0.8667	-0.7922	-0.6034	-0.7536
A8WGA6_K233k_1_1_233_233	A8WGA6	B7ZVL6|A8WGA6|Q7ZZW4|Q6P0T7	A8WGA6_K233k_1_1_233_233	K233k	AkELWDWLYSLEAEK	0	1.0496	0.070631	0.231881	-0.68535	0.192595	0.532319	-0.575285	0.0009566	0.009564	-1.19857	1.83488e-06	0.000430924	0.3611	NA	0.2009	-0.7761	-0.0947	-0.6509	-0.5966	-1.3248	-1.0694	-0.9687	NA	-0.6647	-0.8008	1.4032	1.0141
A8WGA6_K252k_1_1_252_252	A8WGA6	E9QDI4|A0A1D5NS25|A0A1D5NSI6|B7ZVL6|A8WGA6|Q7ZZW4	A8WGA6_K252k_1_1_252_252	K252k	FEHMEkLK	0	1.85932	0.000336936	0.0108367	0.437275	0.331545	0.677123	-0.575285	0.0009566	0.009564	-1.19857	1.83488e-06	0.000430924	0.6129	-0.0116	0.3157	0.6077	0.3572	-0.1792	1.1696	-1.1195	-0.3703	-1.7834	-2.6394	0.1771	-0.3689	0.0253	0.2142
A8WGA6_K257k_1_1_257_257	A8WGA6	A0A1D5NSI6|B7ZVL6|A8WGA6|Q7ZZW4	A8WGA6_K257k_1_1_257_257	K257k	QkYEVTTQR	0	3.1206	0.00773159	0.0659185	4.47137	0.000545065	0.0209625	-0.575285	0.0009566	0.009564	-1.19857	1.83488e-06	0.000430924	2.4393	2.2204	2.6846	1.9105	-3.3294	-3.7422	-1.5124	-0.389	-0.2897	-1.742	NA	-5.2321	-9.8274	-5.0712	-9.2001
A8WGA6_K272k_1_1_272_272	A8WGA6	A8WGA6|Q7ZZW4|Q6P0T7	A8WGA6_K272k_1_1_272_272	K272k	RVEELSkYSK	0	3.25478	4.1629e-06	0.00126274	0.711742	0.135691	0.460185	-0.575285	0.0009566	0.009564	-1.19857	1.83488e-06	0.000430924	2.4863	2.2041	2.4797	1.3101	-2.2377	-2.8629	-1.3165	-1.2036	-0.2444	-1.9562	NA	-3.434	-2.4401	-2.8969	-2.6321
A8WGA6_K71k_1_1_71_71	A8WGA6	E9QIW4|E9QDI4|A0A1D5NS25|A0A1D5NSE8|E9QEG1|A0A1D5NSK1|A0A1D5NSI6|B7ZVL6|A8WGA6|Q7ZZW4|Q6P0T7	A8WGA6_K71k_1_1_71_71	K71k	PkFKPSAPK	0	0.947783	0.361594	0.576336	-1.19479	0.254209	0.605135	-0.575285	0.0009566	0.009564	-1.19857	1.83488e-06	0.000430924	0.0458	-4.8378	-1.1912	-0.2234	-0.1346	-0.4289	-0.8338	-4.5312	-1.2	-1.7671	NA	1.2646	1.2353	0.8182	-0.402
A8WGA6_K92k_1_1_92_92	A8WGA6	E9QIW4|E9QDI4|A0A1D5NS25|A0A1D5NSE8|E9QEG1|A0A1D5NSK1|A0A1D5NSI6|B7ZVL6|A8WGA6	A8WGA6_K92k_1_1_92_92	K92k	IPDGDKVDFDDIQkK	0	0.766025	0.029995	0.142964	-0.315292	0.375646	0.711894	-0.611567	0.00417776	0.023578	-1.90732	1.96266e-07	0.000124452	0.0406	-0.2539	0.2229	0.0319	0.3165	0.317	-0.4246	-1.2692	0.0474	-1.3862	-0.4146	0.7096	0.5946	0.411	-0.1755
A8WGC6_K113k_1_1_113_113	A8WGC6	A8WGC6	atp5f1b	K113k	GQkVLDTGAPIRIPVGPETLGR	0	NA	NA	NA	-0.1314	0.834915	0.954188	1.24259	0.000236601	0.00411007	0.897191	0.00512233	0.0474171	NA	NA	NA	NA	NA	-0.7158	NA	NA	NA	NA	NA	NA	NA	NA	-0.5844
A8WGC6_K187k_1_1_187_187	A8WGC6	A8WGC6	atp5f1b	K187k	VVDLLAPYAkGGK	0	0.238825	0.408586	0.612957	-0.0728333	0.798805	0.943598	1.24259	0.000236601	0.00411007	0.897191	0.00512233	0.0474171	-0.0379	-0.1757	-0.3062	-0.0897	0.1857	0.8678	-0.3513	-0.4571	-0.4607	-0.2558	NA	-0.0296	0.1501	0.7864	0.3207
A8WGC6_K248k_1_1_248_248	A8WGC6	A8WGC6	atp5f1b	K248k	TREGNDLYHEMIESGVINLkDTTSK	0	-0.4274	0.256318	0.469224	-0.477392	0.156483	0.487856	1.24259	0.000236601	0.00411007	0.897191	0.00512233	0.0474171	0.6269	-0.841	-0.2795	0.027	-0.3988	0.0294	-0.3493	0.3931	0.2284	NA	NA	0.0936	0.6416	-0.0935	0.3096
A8WGC6_K474k_1_1_474_474	A8WGC6	A8WGC6	atp5f1b	K474k	LVPLkETIK	0	-1.50945	0.0047305	0.0511077	-0.4294	0.286354	0.636478	1.24259	0.000236601	0.00411007	0.897191	0.00512233	0.0474171	-1.0793	-0.6375	NA	-0.6112	-0.5802	0.0605	-0.315	1.0318	0.4351	NA	NA	0.7611	0.4149	NA	-0.7225
A8WGM1_K192k_1_1_192_192	A8WGM1	A8WGM1	vapal	K192k	QLkDEGLR	0	0.0615083	0.837426	0.92065	-0.332117	0.277921	0.628218	0.11492	0.525694	0.647999	0.202662	0.306489	0.562015	-0.2461	-0.3428	-0.4578	-0.155	0.098	-0.0328	0.1626	-0.5449	0.3557	-0.8966	NA	0.7787	0.7223	0.0805	0.0507
A8WGM1_K3k_1_1_3_3	A8WGM1	A8WGM1	vapal	K3k	SkLEQILVLDPPNDLK	0	0.53465	0.451967	0.65433	-1.04344	0.109801	0.414298	0.11492	0.525694	0.647999	0.202662	0.306489	0.562015	0.1937	-0.2333	0.2695	-0.0913	-0.6597	-1.0334	-0.465	-0.0373	-0.9627	NA	NA	-1.0057	-0.9438	1.4377	1.8081
A8WGP3_K30k_1_1_30_30	A8WGP3	A9JRC7|A8WGP3|F8W259	A8WGP3_K30k_1_1_30_30	K30k	ENEVkALCAK	0	-0.3721	0.166208	0.367187	-0.0301917	0.914415	0.9849	0.151479	0.211485	0.337844	-0.0668056	0.600451	0.801402	-0.1405	-0.0524	-0.5362	-0.0289	0.5174	0.7622	-0.2178	0.2248	0.231	0.1828	0.0918	0.0823	0.9975	0.375	0.0817
A8WGS1_K20k_1_1_20_20	A8WGS1	Q6NZ09|E9QJJ5|E9QHX7|E9QIC6|A8WGS1	adrm1	K20k	SSSSkYLVEFR	0	0.829075	0.00897315	0.0717127	0.232183	0.449058	0.762435	1.15199	3.08585e-06	0.000355826	0.796053	0.000248457	0.00736517	1.1206	1.4138	0.6986	0.8378	0.083	0.0763	0.0796	-0.2789	0.4071	0.5683	0.058	-0.0963	0.4426	-0.8618	-0.0947
A8WGS1_K33k_1_1_33_33	A8WGS1	Q6NZ09|E9QJJ5|E9QHX7|E9QIC6|A8WGS1	adrm1	K33k	MTLkGSTVTPDK	0	-0.1568	0.535115	0.716383	-0.273042	0.322304	0.666222	1.15199	3.08585e-06	0.000355826	0.796053	0.000248457	0.00736517	0.0395	0.112	-0.2731	-0.0216	0.108	-0.1026	-0.2456	0.3976	0.1295	0.1109	-0.154	0.7255	0.5591	-0.3075	-0.2052
A8WGS1_K392k_1_1_392_392	A8WGS1	Q6NZ09|E9QJJ5|A8WGS1	adrm1	K392k	AMEGSDSkTDDGDSK	0	-0.34905	0.241399	0.455835	-0.368692	0.16527	0.500638	1.15199	3.08585e-06	0.000355826	0.796053	0.000248457	0.00736517	-0.4424	-0.3716	-0.3793	-0.3015	-0.628	-0.0832	-0.1104	0.1965	-0.2458	NA	NA	0.0155	0.6291	-0.0815	-0.1838
A8WGS1_K41k_1_1_41_41	A8WGS1	Q6NZ09|E9QJJ5|E9QHX7|E9QIC6|A8WGS1	adrm1	K41k	GSTVTPDkR	0	-0.4148	0.441496	0.642825	-0.657475	0.0894476	0.379548	1.15199	3.08585e-06	0.000355826	0.796053	0.000248457	0.00736517	0.062	-0.5845	-0.1297	-0.1894	-0.2359	-1.3451	-0.6003	NA	0.2044	NA	NA	-0.3698	0.1419	-0.7007	0.6501
A8WI00_K153k_1_1_153_153	A8WI00	A8WI00	stam2	K153k	EEGVTFPTANPQSSSTkPSSTPATSR	0	-0.546975	0.124048	0.310395	0.272758	0.369519	0.705706	-0.106074	0.434956	0.566425	-0.265706	0.0846358	0.269525	-0.4281	-0.3852	-1.2061	-0.1387	0.4799	0.606	0.2159	0.3938	-0.3789	NA	NA	-0.1838	0.1825	0.2084	0.4376
A8WIN6_K416k_1_1_416_416	A8WIN6	A8WIN6	mfn2	K416k	QLDLLTLDCkSK	0	0.090075	0.755912	0.873092	-0.147817	0.637447	0.878716	0.176038	0.0527465	0.130011	-0.40199	0.00060609	0.0129432	0.104	-0.0909	0.2761	0.5214	-0.0739	0.1096	0.0166	0.4949	0.0774	0.1467	-0.2687	-0.7647	0.6567	0.3087	0.4603
A9C3Q4_K502k_1_1_502_502	A9C3Q4	A9C3Q5|A9C3Q4	A9C3Q4_K502k_1_1_502_502	K502k	SMSVYCSPNkAK	0	-0.0364	0.902567	0.954439	0.0081	0.979874	0.994226	0.278401	0.23788	0.367781	0.451749	0.085996	0.270487	0.1288	0.1284	0.7414	0.6884	0.667	-0.4039	-0.0462	0.5358	1.1204	-0.0773	0.2537	0.2388	-0.079	0.272	-0.175
A9C3Q4_K532k_1_1_532_532	A9C3Q4	A9C3Q4	A9C3Q4_K532k_1_1_532_532	K532k	VGGSkVPLTQGIK	0	0.0824417	0.78598	0.889908	-0.0273917	0.928027	0.987203	0.278401	0.23788	0.367781	0.451749	0.085996	0.270487	0.4955	-0.3156	0.2502	0.5638	0.2357	-0.535	0.1059	-0.0566	0.7075	-0.1528	NA	0.2962	-0.0772	-0.2479	-0.1194
A9C3Q4_K540k_1_1_540_540	A9C3Q4	A9C3Q4	A9C3Q4_K540k_1_1_540_540	K540k	VGGSKVPLTQGIkDK	0	-0.7715	0.0149623	0.095933	0.0453083	0.883312	0.97111	0.278401	0.23788	0.367781	0.451749	0.085996	0.270487	-0.0704	1.0516	0.2613	0.0713	-0.2096	-0.2593	-0.2609	1.4374	1.2506	1.1682	0.5436	0.2996	-0.509	-0.4763	-0.4686
A9C3Q4_K570k_1_1_570_570	A9C3Q4	A9C3Q5|A9C3Q4	A9C3Q4_K570k_1_1_570_570	K570k	DNPLkK	0	0.440575	0.0593495	0.213248	0.152392	0.523567	0.81039	0.278401	0.23788	0.367781	0.451749	0.085996	0.270487	0.3241	0.0934	0.183	0.5851	0.4404	0.2028	0.0269	0.0825	0.0606	-0.1308	-0.589	-0.016	-0.234	0.2531	0.2808
A9C3T0_K53k_1_1_53_53	A9C3T0	A9C3T0	prkar2aa	K53k	SQDGSGAAAkTGGK	0	-0.119733	0.633258	0.787306	0.974158	0.00138618	0.038004	0.553325	0.000170885	0.00346247	0.311079	0.0176516	0.104802	-0.398	-0.0695	-0.4706	-0.2455	0.2389	0.0153	-0.0126	0.1231	0.0513	-0.7029	NA	-1.2668	-0.8065	-0.7746	-0.7266
A9C3W5_K145k_1_1_145_145	A9C3W5	A0A2R8QJZ5|A9C3W5|Q7ZV05	A9C3W5_K145k_1_1_145_145	K145k	FNVLkVTK	0	0.537	0.116834	0.300983	0.025775	0.942042	0.989668	-0.0337561	0.873996	0.915724	0.248038	0.291314	0.546311	0.3157	0.1568	0.1423	0.6737	0.0601	0.3524	0.6672	0.104	-0.9591	-0.0582	0.0538	-0.5617	0.987	0.6144	0.2968
A9JRG7_K110k_1_1_110_110	A9JRG7	A0A0R4IIU9|A9JRG7	A9JRG7_K110k_1_1_110_110	K110k	TSEkQEMILLNDR	0	-0.292517	0.243685	0.457396	-0.492658	0.0595378	0.310426	0.755348	0.00128221	0.011405	-0.00570628	0.977544	0.989718	-0.2868	-0.4541	-0.3594	-0.6107	0.0654	-0.0732	0.11	0.1997	-0.4769	-0.1285	NA	0.1456	0.9598	0.3584	0.6431
A9JRG7_K247k_1_1_247_247	A9JRG7	A9JRG7	A9JRG7_K247k_1_1_247_247	K247k	RVHkQEIEELMK	0	-0.886075	0.0165612	0.102529	-0.204508	0.484884	0.788192	0.755348	0.00128221	0.011405	-0.00570628	0.977544	0.989718	-0.3967	-0.0973	0.012	0.0519	0.093	-0.6751	-0.1035	1.0122	0.5449	NA	NA	0.5799	-0.2369	-0.3972	-0.0419
A9JRG7_K309k_1_1_309_309	A9JRG7	A0A0R4IIU9|A9JRG7	A9JRG7_K309k_1_1_309_309	K309k	FDDLNNkTSK	0	-0.688517	0.0761492	0.24042	-0.986225	0.0300726	0.218482	0.755348	0.00128221	0.011405	-0.00570628	0.977544	0.989718	-0.079	-0.1687	-0.3768	1.0199	-0.7155	-1.2269	NA	1.0828	1.0792	0.2001	NA	0.2309	0.2794	-0.4426	-0.0076
A9JRG7_K328k_1_1_328_328	A9JRG7	A9JRG7	A9JRG7_K328k_1_1_328_328	K328k	EGIASAkK	0	0.70185	0.0650629	0.224794	0.811	0.0501676	0.282839	0.755348	0.00128221	0.011405	-0.00570628	0.977544	0.989718	-0.107	0.3329	0.3321	1.1502	0.5964	0.4224	0.5793	-0.4638	0.0099	-0.8868	0.2415	-1.2463	-0.264	0.0499	0.3472
A9JRG7_K334k_1_1_334_334	A9JRG7	A0A0R4IIU9|A9JRG7	A9JRG7_K334k_1_1_334_334	K334k	DIQNkER	0	-0.4912	0.314527	0.528801	0.347183	0.416934	0.737152	0.755348	0.00128221	0.011405	-0.00570628	0.977544	0.989718	-0.6986	-0.8473	-1.3122	-0.2387	0.9486	-0.1893	0.1924	-0.0871	-0.4789	NA	NA	-1.0834	0.0699	0.1127	0.781
A9JRG7_K378k_1_1_378_378	A9JRG7	A9JRG7	A9JRG7_K378k_1_1_378_378	K378k	IEALQLELkSSK	0	-1.45597	4.69444e-05	0.00366042	-0.378142	0.155697	0.486481	0.755348	0.00128221	0.011405	-0.00570628	0.977544	0.989718	-0.5657	-0.352	-1.1702	-0.7968	0.144	0.0776	-0.3691	0.6904	0.5551	0.9589	NA	0.1656	0.0705	0.6606	0.4192
A9JRS6_K140k_1_1_140_140	A9JRS6	Q6NWF6|F1QK60|A0A2R8Q0V6|A0A2R8Q6V3|F1RDG4|A9JRS6	krt4	K140k	FLEQQNkMLETK	0	0.42425	0.471926	0.672286	-0.426767	0.502402	0.795457	0.500554	0.791442	0.856102	-0.464043	0.820386	0.919901	0.0506	-0.3037	0.3205	0.4635	0.0238	1.5721	0.2201	1.1199	-0.3973	-0.4175	-1.4712	2.2902	0.0098	0.0691	1.7593
A9JRS6_K16k_1_1_16_16	A9JRS6	F1QK60|A0A2R8Q0V6|A9JRS6	krt4	K16k	kGYTSQSAYAVPAGSTR	0	-1.604	0.0675227	0.227728	-0.239167	0.668895	0.892861	0.500554	0.791442	0.856102	-0.464043	0.820386	0.919901	-0.0272	-0.7812	0.1025	0.3919	-0.1003	1.5989	-0.3213	1.5255	NA	NA	NA	1.1325	-0.3259	0.0781	1.6417
A9JRS6_K189k_1_1_189_189	A9JRS6	F1QK60|A0A2R8Q0V6|A9JRS6	krt4	K189k	LEGELkNMQGLVEDFK	0	0.276275	0.612813	0.770395	-1.2992	0.0398092	0.247596	0.500554	0.791442	0.856102	-0.464043	0.820386	0.919901	-0.0481	-0.6467	-0.1951	-0.3755	-0.2829	-0.1876	0.484	0.7104	-1.3281	-1.1297	-0.6231	2.809	0.4507	0.0764	1.8787
A9JRS6_K199k_1_1_199_199	A9JRS6	F1QK60|A0A2R8Q0V6|A9JRS6	krt4	K199k	NMQGLVEDFkNKYEDEINK	0	-0.649975	0.199859	0.404595	-1.49913	0.0118024	0.131235	0.500554	0.791442	0.856102	-0.464043	0.820386	0.919901	-0.4717	-0.2241	-0.1364	-1.1519	-0.4213	-0.0429	-0.1394	1.3042	-0.3873	-0.2132	-0.0879	2.5836	0.5968	0.1284	1.8829
A9JRS6_K220k_1_1_220_220	A9JRS6	F1QK60|A0A2R8Q0V6|A9JRS6	krt4	K220k	ASVENEFVLLkK	0	-0.2379	0.629104	0.78341	-1.779	0.00382557	0.0690545	0.500554	0.791442	0.856102	-0.464043	0.820386	0.919901	0.1487	0.3213	0.3094	-1.3276	-0.5498	-0.5841	-0.0337	1.422	-0.5586	-0.1144	-0.3456	1.947	0.677	0.7769	2.1583
A9JRS6_K236k_1_1_236_236	A9JRS6	F1QK60|A0A2R8Q0V6|A9JRS6	krt4	K236k	VELEAkVDALQDEINFLR	0	NA	NA	NA	-0.67235	0.191802	0.53212	0.500554	0.791442	0.856102	-0.464043	0.820386	0.919901	NA	NA	NA	NA	-0.9134	NA	-0.4327	NA	NA	NA	NA	NA	-0.4547	-0.368	0.8206
A9JRS6_K327k_1_1_327_327	A9JRS6	F1QK60|A0A2R8Q0V6|A9JRS6	krt4	K327k	STkAEIAELNR	0	-0.3893	0.551714	0.728012	-0.561142	0.429175	0.747135	0.500554	0.791442	0.856102	-0.464043	0.820386	0.919901	-0.1399	-0.2014	-0.4576	-0.0931	-0.0519	1.0227	0.1975	1.7093	-0.1455	0.8549	-1.7535	2.4822	0.267	-0.2142	1.2673
A9JRS6_K348k_1_1_348_348	A9JRS6	F1QK60|A0A2R8Q0V6|A9JRS6	krt4	K348k	LQNEIDAVkAQR	0	-0.385658	0.51115	0.701817	-0.242067	0.678595	0.896344	0.500554	0.791442	0.856102	-0.464043	0.820386	0.919901	0.0719	-0.053	0.0482	0.5772	0.16	1.964	-0.4547	1.7633	-0.0083	-0.1148	NA	1.2091	0.0739	0.3161	1.5949
A9JRS6_K495k_1_1_495_495	A9JRS6	F1QK60|A0A2R8Q0V6|A9JRS6	krt4	K495k	TSVTTVSSkR	0	0.4985	0.235571	0.448901	0.249292	0.575758	0.843319	0.500554	0.791442	0.856102	-0.464043	0.820386	0.919901	0.5172	0.3327	0.8	0.7476	0.3314	2.012	-0.0122	0.0262	-0.0333	0.2105	0.2001	0.6367	-0.0462	-0.0192	1.5398
A9JRT4_K128k_1_1_128_128	A9JRT4	Q7ZUR2|A9JRT4	ube2d3	K128k	IYkTDTEK	0	0.262783	0.399983	0.606274	0.708692	0.0344749	0.232719	0.0153667	0.949768	0.966222	-0.346971	0.202594	0.442731	0.2763	-0.0921	0.3969	-0.0701	0.6469	-0.2877	0.9937	0.1508	-0.307	-0.2489	NA	-0.3325	-0.6206	-0.2397	0.1619
A9JRT4_K133k_1_1_133_133	A9JRT4	Q7ZUR2|A9JRT4	ube2d3	K133k	IYKTDTEkYNR	0	0.18445	0.511111	0.701817	1.24865	0.000736719	0.0266235	0.0153667	0.949768	0.966222	-0.346971	0.202594	0.442731	1.0958	1.6674	1.8311	0.838	-0.819	-0.4553	-0.6067	1.104	1.3495	1.1761	1.0649	-1.628	-2.6098	-1.4601	-1.8047
A9JRT4_K139k_1_1_139_139	A9JRT4	A9JRT4	ube2d3	K139k	MAkEWTEK	0	-0.495675	0.159697	0.358229	-0.765783	0.051423	0.285517	0.0153667	0.949768	0.966222	-0.346971	0.202594	0.442731	-0.1273	0.2795	-0.1001	-0.4802	-0.0179	-0.5763	-0.107	0.9573	1.1053	0.1404	-0.6484	0.7008	0.1459	0.7607	0.5208
A9JRT4_K144k_1_1_144_144	A9JRT4	A9JRT4	ube2d3	K144k M147m	EWTEkYAmL	0	1.66647	0.0164093	0.101907	0.787267	0.255987	0.608252	0.0153667	0.949768	0.966222	-0.346971	0.202594	0.442731	0.6837	0.4121	1.1757	0.9007	-1.3901	0.7233	1.327	-0.3561	-1.9448	-1.2731	0.0803	-2.2439	-0.3131	0.0415	0.2467
A9JTG5_K215k_1_1_215_215	A9JTG5	A9JTG5|A0A1D5NSY4	rbck1	K215k	AALSIQPSkR	0	-0.1513	0.531202	0.71458	0.550658	0.0473134	0.272442	0.158203	0.697724	0.787805	-0.231015	0.600438	0.801402	0.1496	-0.3386	0.3013	0.3116	0.3578	0.2578	0.6232	0.217	0.2924	0.333	0.1867	0.3222	-0.6855	0.1138	-0.3014
A9JTG7_K111k_1_1_111_111	A9JTG7	A2CE82|A9JTG7	ubac1	K111k	MTDISSEEkK	0	0.20185	0.437152	0.640557	-0.4703	0.0834041	0.36638	0.520865	0.00224704	0.016194	0.15458	0.315256	0.570176	-0.6147	-0.4417	-0.1236	0.2266	0.0388	-0.2769	-0.1477	-0.3901	-0.2353	-0.6952	NA	0.627	0.5547	0.1026	0.0825
A9JTG7_K178k_1_1_178_178	A9JTG7	A2CE82|A9JTG7	ubac1	K178k	LLALNPDAVELFkK	0	-0.12835	0.649419	0.799348	-1.02913	0.00359902	0.0665725	0.520865	0.00224704	0.016194	0.15458	0.315256	0.570176	0.0552	-0.5761	-0.0982	0.062	0.0635	0.1186	-0.9646	-0.2077	0.1974	-0.1285	0.0951	0.4391	0.4485	1.2539	0.9317
A9UH06_K58k_1_1_58_58	A9UH06	F1R687|A0A0R4IJN6|A5YC47|A9UH09|Q08BY7|B8JIV1|E7FD06|A5YC70|A9UH12|A9UH05|B7ZUV4|A9UH06	mbnl1	K58k	VIACFDSLkGR	0	-0.573683	0.0746318	0.238173	-0.278217	0.366195	0.702879	0.0968433	0.374189	0.508705	0.0919687	0.432978	0.67292	0.0283	0.0161	-0.1747	0.2373	0.2327	0.385	-0.6989	0.0768	NA	0.6915	1.033	0.4636	0.3619	0.2845	-0.1054
B0QZE8_K591k_1_1_591_591	B0QZE8	B0QZE8	dcaf6	K591k	SSSGGQkSGELEESQSREEPPGHK	0	0.17215	0.580522	0.750206	-0.0761833	0.805947	0.945267	0.372995	0.00761219	0.035383	0.332603	0.0217733	0.119375	-0.2659	0.2291	-0.1135	0.1273	-0.0304	0.0443	-0.0887	-0.2784	0.52	-0.7753	NA	0.62	-0.1249	0.0482	-0.3383
B0R0D7_K399k_1_1_399_399	B0R0D7	B0R0D7	coro1ca	K399k	HGYIPGkNR	0	-0.647333	0.0780425	0.243675	0.0843	0.794259	0.941868	-0.0287456	0.807517	0.869191	0.133292	0.305339	0.560555	0.5912	NA	0.0563	-0.2687	0.1462	-0.0749	-0.5159	0.263	0.9784	1.0794	NA	-0.7686	-0.316	-0.0781	0.2327
B0R0D7_K436k_1_1_436_436	B0R0D7	B0R0D7	coro1ca	K436k	TATSTPSIkSEAK	0	-0.2066	0.355233	0.569409	-0.128883	0.589798	0.849341	-0.0287456	0.807517	0.869191	0.133292	0.305339	0.560555	-0.6281	-0.8497	-0.572	-0.5864	0.2145	0.5005	-0.0155	-0.5477	-0.3697	-0.3515	-0.5409	0.6329	0.7418	-0.1273	0.2008
B0R0D7_K446k_1_1_446_446	B0R0D7	B0R0D7	coro1ca	K446k	LEEVLkEIK	0	-0.8044	0.511884	0.701817	-0.307975	0.639896	0.878725	-0.0287456	0.807517	0.869191	0.133292	0.305339	0.560555	-1.5479	NA	NA	NA	-0.4342	0.0656	-1.7164	NA	-0.7435	NA	NA	0.5841	0.5404	-1.7214	-0.9512
B0R0K9_K153k_1_1_153_153	B0R0K9	B0R0K9	si:ch211-103n10.5	K153k	ADETAAVkK	0	0.37755	0.398717	0.605633	0.17995	0.684525	0.898302	1.35016	0.0182207	0.0631107	1.30436	0.0311946	0.147395	0.6023	0.7547	-0.0741	0.2773	-0.1708	0.3829	-0.1554	0.6436	0.0142	-0.6203	NA	-1.2946	-0.1013	-0.1532	0.9049
B0R0K9_K35k_1_1_35_35	B0R0K9	B0R0K9	si:ch211-103n10.5	K35k	SGASVSDLILkIVSSSK	0	-1.34995	0.194217	0.398227	-1.1817	0.0985153	0.395571	1.35016	0.0182207	0.0631107	1.30436	0.0311946	0.147395	-1.8853	NA	NA	-1.8762	-0.7373	-0.9776	-0.8713	-0.5308	NA	NA	NA	NA	-1.4816	1.1683	1.2722
B0R0K9_K41k_1_1_41_41	B0R0K9	B0R0K9	si:ch211-103n10.5	K41k	IVSSSkER	0	0.706408	0.0490409	0.192963	-0.0372583	0.911152	0.983728	1.35016	0.0182207	0.0631107	1.30436	0.0311946	0.147395	0.4868	0.4264	0.1678	0.1201	0.1272	-0.2364	0.074	-0.0733	0.2025	-1.3476	NA	0.1364	-0.3381	-0.131	0.4348
B0R137_K294k_1_1_294_294	B0R137	Q6PH37|B0R137	sult1st1	K294k	NATVkFR	0	0.121475	0.602372	0.764029	-0.0747083	0.766028	0.931589	0.236988	0.0765829	0.168252	-0.0474862	0.726679	0.875189	0.5192	0.2666	0.4417	0.2491	0.1586	-0.2419	0.0757	0.4171	0.1786	0.415	-0.02	-0.4601	-0.0671	0.2439	0.572
B0R197_K144k_1_1_144_144	B0R197	B0R198|B0R197	vdac3	K144k	LGLDTSFVPNTGkK	0	-0.4677	0.0734048	0.237634	-0.3725	0.176272	0.513944	1.51793	9.02264e-05	0.00238423	1.16639	0.00158932	0.0234754	-0.0012	0.4564	0.6286	0.3941	-0.3468	-0.0273	0.2256	1.1641	0.8062	0.9028	0.4756	0.6121	0.6997	-0.0204	0.0006
B0R1B8_K277k_1_1_277_277	B0R1B8	A0A0R4IZ96|B0R1B8	neflb	K277k	GkVSTMAEDTAK	0	-0.6956	0.0255477	0.131738	0.774583	0.00718004	0.0961621	0.775145	8.24141e-05	0.00229991	0.936316	2.8007e-05	0.0020181	-0.646	-0.1478	-0.6299	-0.1781	0.2862	0.8409	0.4852	NA	0.1119	0.4784	NA	-0.3818	-0.3639	-0.3139	0.111
B0R1D0_K397k_1_1_397_397	B0R1D0	B0R1D0	psmc4	K397k	YIVLAkDFEK	0	NA	NA	NA	1.18915	0.0523015	0.288864	0.596199	0.00224193	0.0161922	0.318962	0.0823561	0.265761	-0.2156	NA	-1.3448	-0.8988	NA	0.8165	0.0428	NA	NA	NA	NA	NA	-1.2844	NA	-0.2346
B0R1D0_K418k_1_1_418_418	B0R1D0	B0R1D0	psmc4	K418k	KDEQEHEFYk	0	-0.548925	0.038505	0.164855	-0.63365	0.0284366	0.213631	0.596199	0.00224193	0.0161922	0.318962	0.0823561	0.265761	-0.4696	-0.529	-0.6203	-0.3	-0.0822	-0.2982	-0.6801	0.2274	-0.1342	-0.1388	0.3224	0.5677	0.7791	-0.1369	-0.0893
B0S553_K237k_1_1_237_237	B0S553	B0S553	nefmb	K237k	DLQkTDITSALR	0	-0.794225	0.00201575	0.0305529	0.0489917	0.819053	0.948417	0.854273	0.0001532	0.0033073	0.756513	0.00083022	0.0154018	-0.1038	-0.216	-0.1326	-0.6369	0.5095	0.1969	0.2589	0.5045	0.3642	0.697	NA	0.0821	0.2946	0.4132	0.3012
B0S553_K29k_1_1_29_29	B0S553	B0S553	nefmb	K29k	SWAkSSPLSFK	0	-0.0714	0.884838	0.946059	0.830208	0.0268946	0.207475	0.854273	0.0001532	0.0033073	0.756513	0.00083022	0.0154018	0.0824	-1.0504	-0.4374	-0.0246	0.4	0.5898	0.7668	NA	NA	-0.2861	NA	-0.336	0.2278	-0.8682	-0.0023
B0S5H3_K744k_1_1_744_744	B0S5H3	X1WCG5|A0A286Y8X6|B0S5H3|B2CZC0	B0S5H3_K744k_1_1_744_744	K744k	IRNEkGEIEQERIDK	0	0.65895	0.0516315	0.197275	1.00379	0.00928872	0.112214	-1.37133	0.00218828	0.0160272	-0.511478	0.210449	0.452051	1.16	0.8535	0.5139	1.2145	0.0497	-0.0378	0.7458	1.1049	0.1771	-0.2994	0.1235	-0.6676	-1.1745	-0.234	-0.9288
B0S6B5_K178k_1_1_178_178	B0S6B5	B0S6B5	ifi44c2	K178k	NVHWDSEkK	0	-0.87185	0.0549248	0.20479	0.429892	0.25966	0.611587	-0.0106592	0.962432	0.975507	0.661306	0.016451	0.100321	-0.5693	-0.6759	0.1472	0.0336	0.4687	-0.3137	-0.2205	0.8121	0.3994	NA	NA	0.2319	-1.3249	-0.1958	-0.5181
B0S6B5_K197k_1_1_197_197	B0S6B5	B0S6B5	ifi44c2	K197k	ALLSSISSWKPSVSSIkQAR	0	0.8616	0.193155	0.396945	-0.0687417	0.908626	0.98245	-0.0106592	0.962432	0.975507	0.661306	0.016451	0.100321	-0.0468	NA	0.1379	-0.7133	-0.5903	0.7588	-0.5815	-1.7603	-1.1031	-0.3436	NA	-1.4659	-0.6938	0.8243	1.0597
B0S6B5_K309k_1_1_309_309	B0S6B5	B0S6B5	ifi44c2	K309k	YQFNPSMPIQPDSPYFVkSPGLK	0	1.0785	0.265028	0.477871	0.429975	0.403149	0.731346	-0.0106592	0.962432	0.975507	0.661306	0.016451	0.100321	NA	NA	-0.0952	NA	-0.1499	1.0727	-1.2735	NA	-1.1737	NA	NA	-0.1223	-0.5389	-0.7374	-0.7889
B0S6K3_K218k_1_1_218_218	B0S6K3	B0S6K3	cacybp	K218k	AWVESQEkK	0	-0.7813	0.200791	0.405684	-0.456275	0.228596	0.578852	-0.448561	0.00227641	0.0162229	0.130213	0.326377	0.579221	NA	NA	NA	0.0461	-0.5264	-0.9909	-1.5985	0.6669	0.9879	NA	NA	-0.6177	-0.0732	-0.3328	-1.3056
B0S6P6_K47k_1_1_47_47	B0S6P6	B0S6P6	ddx3xa	K47k	DASkNDSPGWDGSR	0	-1.3342	0.0132993	0.0894762	0.374867	0.326524	0.671448	-0.0142303	0.928482	0.953901	-0.139253	0.42212	0.663706	-0.7149	NA	-1.056	NA	-0.405	0.438	-0.0034	0.3164	0.5811	NA	NA	0.0947	-0.0859	NA	-1.1038
B0S6Z1_K863k_1_1_863_863	B0S6Z1	B0S6Z1	dhx9	K863k	ILAkLPIEPR	0	-0.386175	0.16458	0.364343	-0.041325	0.877556	0.967354	-0.204369	0.0641581	0.149889	0.0906227	0.420867	0.662712	-0.531	0.0203	-0.1652	-0.238	0.2973	-0.0276	0.1098	0.2547	0.1563	0.0621	NA	0.8524	0.0709	-0.3264	0.0744
B0S751_K147k_1_1_147_147	B0S751	Q7ZUC7|A0A2R8Q6K2|B0S751	ptgesl	K147k	QEIkWSTYR	0	0.090575	0.721897	0.849948	0.234233	0.398851	0.729866	0.353805	0.00560666	0.0288616	0.308828	0.0189238	0.108495	0.5268	0.5832	0.3007	0.7925	0.3119	0.439	-0.2435	-0.0766	1.0944	0.3451	0.478	-0.3009	0.0335	0.0378	-0.0308
B0S757_K264k_1_1_264_264	B0S757	B0S757	ttn.2	K264k	EPVSAPGAVkK	0	-0.07255	0.78425	0.888712	-0.107717	0.68487	0.898302	0.0398949	0.882528	0.921619	-0.375108	0.212488	0.454892	-0.2257	0.1101	-0.3399	-0.0339	0.1934	-0.0091	0.1095	0.5099	-0.5232	-0.1361	NA	0.4814	0.4053	-0.0692	0.0051
B0S758_K6015k_1_1_6015_6015	B0S758	B0S758	ttn.2	K6015k	ISWYkNDAILSDGGNLR	0	-0.193225	0.494521	0.690306	0.753333	0.023159	0.191863	0.0298276	0.869291	0.91233	0.498587	0.022301	0.120452	-0.1845	0.305	0.2302	0.6224	0.8102	0.7293	0.2438	0.0116	0.0554	0.8099	0.8691	-0.6502	-0.2257	0.1939	0.0464
B0S758_K6687k_1_1_6687_6687	B0S758	B0S758	ttn.2	K6687k	MEFFkGIACLK	0	-0.0209	0.938511	0.973593	0.872158	0.00839121	0.105317	0.0298276	0.869291	0.91233	0.498587	0.022301	0.120452	-0.1163	0.386	0.3731	0.5023	0.7712	0.5497	0.6592	-0.089	0.3291	0.0563	0.9323	-0.5197	-0.6481	0.1148	0.2045
B0S768_K718k_1_1_718_718	B0S768	B0S768	mphosph8	K718k	QkTGTTALMHAADK	0	-0.29205	0.351053	0.566354	-0.0798667	0.810786	0.947374	0.472724	0.109464	0.215596	0.725468	0.0297958	0.143124	-0.1872	0.0661	0.8059	0.0397	0.2732	0.4573	-0.0584	-0.0625	0.518	0.9963	0.4409	0.2984	0.9135	-0.3517	0.3554
B0S768_K933k_1_1_933_933	B0S768	B0S768	mphosph8	K933k	LAESPTAkVK	0	-0.621825	0.0646212	0.22405	-0.485808	0.169778	0.505646	0.472724	0.109464	0.215596	0.725468	0.0297958	0.143124	-0.0125	-0.4298	-0.6317	0.0785	-0.0638	0.1511	-0.3742	0.5559	0.6592	0.1572	0.1195	1.122	0.8309	-0.4144	0.0222
B0S784_K162k_1_1_162_162	B0S784	B0S784	B0S784_K162k_1_1_162_162	K162k	HEAAFDNVVSDLSGkAK	0	-0.724125	0.00747413	0.0646923	-0.062375	0.808857	0.947374	2.03575	5.68505e-05	0.00193542	1.24913	0.00537737	0.0485725	0.053	-0.0076	0.2526	-0.5037	0.505	-0.2206	0.4818	0.6141	1.0056	0.3349	0.7362	0.2472	0.1594	0.3749	0.4896
B0S784_K164k_1_1_164_164	B0S784	B0S784	B0S784_K164k_1_1_164_164	K164k	AkSAAETMAK	0	-0.24045	0.69681	0.831046	0.14775	0.844364	0.956096	2.03575	5.68505e-05	0.00193542	1.24913	0.00537737	0.0485725	0.5444	-0.4795	NA	NA	-0.7731	NA	0.6976	0.5605	-0.0147	NA	NA	NA	NA	NA	-0.1855
B0S784_K172k_1_1_172_172	B0S784	B0S784	B0S784_K172k_1_1_172_172	K172k	SAAETMAkEGLTLLNSDK	0	0.380675	0.273597	0.484274	-0.0448167	0.903075	0.980717	2.03575	5.68505e-05	0.00193542	1.24913	0.00537737	0.0485725	0.4034	-0.0391	0.4147	0.1102	-0.1798	0.2851	0.7489	0.3906	0.269	-0.9254	-0.3677	-0.3075	0.1052	0.4899	1.0306
B0S789_K203k_1_1_203_203	B0S789	B0S791|B0S789	stat1b	K203k	EIQQEEMAIkR	0	0.226608	0.38979	0.598142	0.428392	0.11549	0.423194	0.178901	0.198503	0.322328	0.125532	0.394575	0.639408	0.2593	0.1139	0.3583	0.0776	0.288	0.4705	-0.1685	0.0799	0.2786	-0.4315	NA	-0.168	-0.0048	-0.7132	-0.0409
B0S7C3_K330k_1_1_330_330	B0S7C3	B0S7C2|B0S7C3	ubtfl	K330k	MVLCSkQWK	0	-0.2	0.38648	0.595603	-0.0306333	0.901031	0.979452	0.251185	0.128279	0.240463	0.469818	0.0147623	0.0934207	0.3744	0.884	0.5868	0.9049	-0.2774	0.0182	0.0659	1.0193	0.3127	1.314	0.9041	-0.054	-0.0809	0.0464	-0.0467
B0S7E7_K448k_1_1_448_448	B0S7E7	B0S7E7|F1RCV2	acsbg2	K448k	SIGAkSSTVR	0	-0.275425	0.528263	0.71279	1.06686	0.035097	0.233534	-1.98224	0.00500873	0.0267836	-1.29545	0.0618559	0.22516	0.106	-0.1041	0.9567	0.4607	0.7112	1.1677	0.1513	-0.1148	0.2664	0.4468	1.9226	-1.0729	0.4693	-0.4669	-0.49
B0S7L9_K265k_1_1_265_265	B0S7L9	A0A0G2L7N0|F1QBI0|F1QBV5|B0S7L9	kif1ab	K265k	LkEGANINK	0	-0.559442	0.0696273	0.230883	0.141308	0.627549	0.873402	0.72462	0.00010215	0.00254053	0.251574	0.099099	0.29394	-0.3234	0.6049	-0.1319	-0.0587	0.4539	0.1588	-0.5328	0.309	0.7806	0.6569	NA	-0.1204	0.0617	-0.3967	-0.0033
B0UX67_K295k_1_1_295_295	B0UX67	F1Q9H9|B0UX67	mtor	K295k	ELMGFSTkPR	0	-0.210875	0.497089	0.690722	0.118175	0.701898	0.903242	-0.483073	0.194742	0.318476	-0.0305378	0.937409	0.975564	0.0495	0.2982	0.5264	0.2556	-0.3189	0.2432	0.2962	0.4262	0.4477	0.606	NA	-0.3069	-0.6854	0.7541	0.0595
B0UXP9_K134k_1_1_134_134	B0UXP9	B0UXP9	impdh2	K134k	DVFQAkAR	0	-0.362125	0.232238	0.44488	0.892908	0.0123267	0.133892	0.152279	0.301604	0.437137	0.192404	0.230444	0.475987	-0.073	0.0935	-0.1059	0.3363	0.8059	0.455	0.5545	-0.5216	0.6489	1.1111	0.461	-0.0591	-0.6339	-0.3925	-0.0656
B0UXP9_K167k_1_1_167_167	B0UXP9	B0UXP9	impdh2	K167k	DIDFLkESEHDLPLSEVMTK	0	0.472125	0.268642	0.481316	0.167975	0.557078	0.829649	0.152279	0.301604	0.437137	0.192404	0.230444	0.475987	-0.7661	-1.0401	-1.4915	-0.8206	0.5028	0.175	0.5567	NA	-1.5017	NA	NA	-0.1407	-0.0025	0.7447	0.3726
B0UXY9_K172k_1_1_172_172	B0UXY9	B0UXY9	faf1	K172k	GWkSGDVSDSTVLR	0	0.126625	0.587463	0.754301	0.367442	0.157019	0.488302	-0.517716	0.130914	0.24362	0.0958975	0.786377	0.905259	0.3567	0.4026	0.5629	0.0706	0.5602	0.8251	0.5463	-0.1872	0.0355	0.3599	0.6781	0.7082	0.1691	0.0702	0.1582
B0UY60_K236k_1_1_236_236	B0UY60	B0UY60	neb	K236k	AMLDFETPTYVTAkEAQHLQSQR	0	-0.211192	0.502497	0.695821	-0.298117	0.3477	0.69046	0.168731	0.760309	0.833802	-0.73773	0.229592	0.475211	0.3105	0.5861	-0.3085	0.3606	0.2576	-0.6335	0.0439	-0.0351	0.3574	1.0228	NA	0.3908	0.2036	0.2328	-0.0774
B0UY61_K1416k_1_1_1416_1416	B0UY61	A0A2R8QKU1|B0UY61	neb	K1416k	IGGkIQSEHNYR	0	1.71685	0.0663814	0.226283	NA	NA	NA	-2.32763	8.00958e-09	1.26992e-05	-2.30405	2.26537e-08	4.78825e-05	1.2861	2.0467	1.2149	1.0333	NA	NA	NA	NA	-0.3216	NA	NA	0.3568	-0.3001	-1.7292	-2.2003
B0UY61_K2698k_1_1_2698_2698	B0UY61	A0A2R8QKU1|B0UY61	neb	K2698k	TNYSVkQYK	0	0.475875	0.235484	0.448901	0.433083	0.278221	0.628218	-2.32763	8.00958e-09	1.26992e-05	-2.30405	2.26537e-08	4.78825e-05	0.5561	1.0285	0.8368	0.8437	0.0113	0.1304	-0.2499	1.1661	0.1598	-0.3047	NA	0.5866	-0.6607	-0.8966	-0.9059
B0UY61_K2722k_1_1_2722_2722	B0UY61	A0A2R8QKU1|B0UY61	neb	K2722k	GDAISIkAAK	0	-0.246583	0.541751	0.721653	-1.17974	0.00965521	0.114985	-2.32763	8.00958e-09	1.26992e-05	-2.30405	2.26537e-08	4.78825e-05	0.2024	-0.5837	-1.5779	0.0386	-0.3628	-0.8177	-0.3818	0.452	-0.2616	-0.8911	NA	0.6333	0.6535	0.8353	0.5138
B0UY61_K2965k_1_1_2965_2965	B0UY61	A0A2R8QKU1|B0UY61	neb	K2965k	GYDLRGDAIAIkAAK	0	0.210175	0.545058	0.723364	0.2985	0.428247	0.746695	-2.32763	8.00958e-09	1.26992e-05	-2.30405	2.26537e-08	4.78825e-05	1.3069	0.7478	0.771	0.8174	-0.4493	-0.0123	0.5039	0.6457	0.3161	0.7712	1.0694	-1.0755	-0.8147	0.4821	0.2705
B0UY61_K3201k_1_1_3201_3201	B0UY61	A0A2R8QKU1|B0UY61	neb	K3201k	GYDIkTDAVAIR	0	0.594775	0.0361132	0.157281	0.719525	0.0209959	0.180359	-2.32763	8.00958e-09	1.26992e-05	-2.30405	2.26537e-08	4.78825e-05	0.9018	1.0207	0.4508	0.9239	0.4686	0.3924	0.3954	0.4564	-0.3783	0.2976	0.5424	0.2222	-0.0973	-0.6972	-0.6306
B0UY61_K3451k_1_1_3451_3451	B0UY61	A0A2R8QKU1|B0UY61	neb	K3451k	DAVSVkSAK	0	-0.07005	0.879099	0.942215	-0.575675	0.102076	0.399909	-2.32763	8.00958e-09	1.26992e-05	-2.30405	2.26537e-08	4.78825e-05	NA	NA	0.11	NA	-0.4601	-0.8042	NA	0.0666	0.2935	NA	NA	-0.5906	0.1925	-0.0288	0.201
B0UY61_K3936k_1_1_3936_3936	B0UY61	A0A2R8QKU1|B0UY61	neb	K3936k	ATSYFMPGDAVPIkQCIHNSK	0	-0.79265	0.0588791	0.21205	-0.911	0.0459973	0.268552	-2.32763	8.00958e-09	1.26992e-05	-2.30405	2.26537e-08	4.78825e-05	-0.5234	-0.5311	0.3711	-1.9013	-0.345	-0.5203	-0.0962	-0.1586	-0.012	0.4068	0.3497	0.3204	-0.0195	0.898	1.1631
B0UY61_K3943k_1_1_3943_3943	B0UY61	B0UY61	neb	K3943k	QCIHNSkVQSDYK	0	-0.650225	0.0702003	0.231234	-0.949983	0.0124817	0.134854	-2.32763	8.00958e-09	1.26992e-05	-2.30405	2.26537e-08	4.78825e-05	-0.087	NA	-1.0862	0.3149	-0.2648	-0.7655	-0.3555	0.2852	0.4322	-0.0074	0.7465	0.9055	0.0715	0.731	0.2442
B0UY61_K3949k_1_1_3949_3949	B0UY61	B0UY61	neb	K3949k	VQSDYkYK	0	-0.3982	0.184233	0.386851	-0.213058	0.501078	0.795457	-2.32763	8.00958e-09	1.26992e-05	-2.30405	2.26537e-08	4.78825e-05	0.4401	0.1547	-0.0541	0.5519	0.0652	-0.0237	-0.3158	0.2787	0.5329	1.0895	0.7843	-0.7241	0.6683	0.3925	0.1498
B0UY61_K420k_1_1_420_420	B0UY61	B0UY61	neb	K420k	ADYEDIkAR	0	0.0719333	0.801601	0.898593	0.329492	0.260285	0.611587	-2.32763	8.00958e-09	1.26992e-05	-2.30405	2.26537e-08	4.78825e-05	0.3257	-0.0206	0.6319	0.3618	0.2885	0.2734	-0.1165	0.1696	0.5018	0.0869	NA	0.2887	-0.3955	-0.7957	0.1784
B0UY61_K4545k_1_1_4545_4545	B0UY61	A0A2R8QKU1|B0UY61	neb	K4545k	AkGIEHFK	0	-1.08365	0.000283946	0.00995178	-1.05408	0.000723179	0.0263615	-2.32763	8.00958e-09	1.26992e-05	-2.30405	2.26537e-08	4.78825e-05	-0.1502	0.0878	-0.6153	-0.2385	-0.2996	-0.6141	-0.8857	0.8003	1.1133	0.9547	0.5501	0.4848	0.0813	0.842	0.409
B0UY61_K4570k_1_1_4570_4570	B0UY61	A0A2R8QKU1|B0UY61	neb	K4570k	QSAkNLSELNYR	0	-0.4745	0.283353	0.492507	-1.02722	0.0299228	0.217771	-2.32763	8.00958e-09	1.26992e-05	-2.30405	2.26537e-08	4.78825e-05	-1.1692	-1.8513	-0.8847	-1.31	-0.1634	-0.3243	-0.3789	0.5519	-1.8109	-1.2289	NA	0.9504	0.5255	0.6534	0.8241
B0UY61_K4721k_1_1_4721_4721	B0UY61	A0A2R8QKU1|B0UY61	neb	K4721k	ATQHAISDLCYkEK	0	-0.1111	0.725063	0.852002	-0.786033	0.0174981	0.164335	-2.32763	8.00958e-09	1.26992e-05	-2.30405	2.26537e-08	4.78825e-05	0.0576	-0.5824	0.1709	NA	-0.1227	-0.8184	-0.4837	0.0213	0.314	-0.3559	NA	0.6207	0.4878	-0.1751	0.311
B0UY61_K4723k_1_1_4723_4723	B0UY61	A0A2R8QKU1|B0UY61	neb	K4723k	EkYYNTR	0	0.0655333	0.832146	0.916861	0.06355	0.826095	0.950588	-2.32763	8.00958e-09	1.26992e-05	-2.30405	2.26537e-08	4.78825e-05	0.3374	NA	0.5314	0.7027	-0.1419	-0.3214	-0.0107	0.0136	0.3468	1.0145	NA	-0.3296	-0.654	-0.1839	0.2813
B0UY61_K4997k_1_1_4997_4997	B0UY61	A0A2R8QKU1|B0UY61	neb	K4997k	DCISDIkYK	0	0.896025	0.000418041	0.0121601	-0.431542	0.0630901	0.320906	-2.32763	8.00958e-09	1.26992e-05	-2.30405	2.26537e-08	4.78825e-05	0.6595	0.4206	0.1698	0.249	0.1748	-0.0672	-0.0562	-0.4416	-0.5242	-0.3136	-0.8058	0.7245	0.3022	0.5668	0.2012
B0UY61_K5025k_1_1_5025_5025	B0UY61	A0A2R8QKU1|B0UY61	neb	K5025k	AEQNkNLYSER	0	0.0302583	0.938573	0.973593	-0.62335	0.12823	0.44388	-2.32763	8.00958e-09	1.26992e-05	-2.30405	2.26537e-08	4.78825e-05	0.2672	0.4649	-0.7455	-1.1469	-0.0021	-0.4039	-0.2519	0.2578	-0.1559	-1.0629	NA	0.2416	0.4973	0.3334	0.5439
B0UY61_K5039k_1_1_5039_5039	B0UY61	A0A2R8QKU1|B0UY61	neb	K5039k	ASFEkNR	0	-0.140625	0.705463	0.837524	-0.640792	0.124854	0.437983	-2.32763	8.00958e-09	1.26992e-05	-2.30405	2.26537e-08	4.78825e-05	0.325	0.0925	-0.695	-0.0183	-0.1118	-0.7431	0.1062	0.2517	0.8004	-0.0453	-0.7401	-0.3734	0.2852	1.0814	0.5717
B0UY61_K5045k_1_1_5045_5045	B0UY61	A0A2R8QKU1|B0UY61	neb	K5045k	ANFkYTCDTPFFEAAK	0	-0.259892	0.36928	0.581326	-0.112675	0.69363	0.90001	-2.32763	8.00958e-09	1.26992e-05	-2.30405	2.26537e-08	4.78825e-05	NA	0.3082	0.1992	-0.3021	0.1811	0.1118	0.0509	-0.1139	0.076	0.8993	0.4519	-0.1025	0.0133	0.3295	0.6688
B0UY61_K5199k_1_1_5199_5199	B0UY61	A0A2R8QKU1|B0UY61	neb	K5199k	VkEITSNLK	0	0.17465	0.442869	0.643886	-0.220908	0.334791	0.680318	-2.32763	8.00958e-09	1.26992e-05	-2.30405	2.26537e-08	4.78825e-05	-0.2067	0.4252	-0.0191	-0.0596	0.0333	-0.0276	0.0599	0.2263	-0.2705	-0.3749	NA	0.3478	0.3076	0.1133	0.2024
B0UY61_K5428k_1_1_5428_5428	B0UY61	B0UY61	neb	K5428k	AkLTYTSVADRPDIR	0	NA	NA	NA	-1.2835	0.0387512	0.244646	-2.32763	8.00958e-09	1.26992e-05	-2.30405	2.26537e-08	4.78825e-05	NA	NA	NA	NA	NA	-1.2661	NA	NA	-0.4546	0.8082	NA	0.3072	0.2149	-0.2173	-0.2352
B0UY61_K5531k_1_1_5531_5531	B0UY61	B0UY60|A0A2R8QKU1|F1Q6R4|B0UY61	neb	K5531k	GkRPQYDLK	0	-0.806275	0.0119189	0.084121	-0.737092	0.0286591	0.214152	-2.32763	8.00958e-09	1.26992e-05	-2.30405	2.26537e-08	4.78825e-05	-0.438	0.5055	-0.77	-0.2443	0.1095	-0.242	-0.3831	0.6489	0.4819	0.3847	0.7628	1.0988	0.6743	0.4595	0.0283
B0UY61_K5541k_1_1_5541_5541	B0UY61	B0UY60|A0A2R8QKU1|F1Q6R4|B0UY61	neb	K5541k	NSkIYQTLK	0	-1.1326	0.00725378	0.0639108	-1.23623	0.00170536	0.0428077	-2.32763	8.00958e-09	1.26992e-05	-2.30405	2.26537e-08	4.78825e-05	-0.3742	NA	-0.9003	NA	-0.6303	-0.1116	-1.4062	0.5713	0.2969	0.3484	0.7648	0.9068	0.1069	0.7025	0.3646
B0UY61_K5746k_1_1_5746_5746	B0UY61	B0UY61	neb	K5746k	ALEQEIkGK	0	-0.8782	0.0793989	0.24595	-1.96188	0.000250111	0.013961	-2.32763	8.00958e-09	1.26992e-05	-2.30405	2.26537e-08	4.78825e-05	-1.131	-1.236	NA	NA	-0.9661	-1.5734	-1.3305	0.1721	0.1755	-1.2635	NA	1.3812	0.6337	0.4663	0.2063
B0UY61_K5748k_1_1_5748_5748	B0UY61	F1Q6R4|B0UY61	neb	K5748k	GkGMLALATDTPDFLR	0	-0.3485	0.60724	0.76798	-0.615017	0.404477	0.73168	-2.32763	8.00958e-09	1.26992e-05	-2.30405	2.26537e-08	4.78825e-05	-0.4432	-0.3268	-1.0606	0.0506	-0.6598	-0.1481	-0.1376	-0.8794	-1.2651	0.4838	1.2747	-2.0678	1.1777	1.2461	0.8434
B0UY61_K5950k_1_1_5950_5950	B0UY61	A0A2R8QKU1|F1Q6R4|B0UY61|F1Q824	neb	K5950k	IISGVkYHQDFEK	0	-0.946575	0.00137622	0.025089	-0.938642	0.00265588	0.055947	-2.32763	8.00958e-09	1.26992e-05	-2.30405	2.26537e-08	4.78825e-05	-0.3943	-0.4288	-0.4921	-0.5386	0.0886	-0.4083	-0.5253	-0.0678	0.6625	0.631	0.7068	0.9917	0.8197	0.6889	0.1276
B0UY61_K5957k_1_1_5957_5957	B0UY61	A0A2R8QKU1|F1Q6R4|B0UY61|F1Q824	neb	K5957k	YHQDFEkSK	0	NA	NA	NA	-0.941467	0.0499341	0.282488	-2.32763	8.00958e-09	1.26992e-05	-2.30405	2.26537e-08	4.78825e-05	NA	NA	NA	NA	-0.4789	-1.3745	-0.3956	NA	0.094	-0.7157	NA	0.877	0.0171	0.5803	-0.7072
B0UY61_K5959k_1_1_5959_5959	B0UY61	B0UY61|F1Q824	neb	K5959k	SkGSFTPTISDPVTER	0	-1.76375	0.00061654	0.0148523	-1.01253	0.0369325	0.237775	-2.32763	8.00958e-09	1.26992e-05	-2.30405	2.26537e-08	4.78825e-05	-0.5102	-2.6085	-0.6433	-1.2673	-0.0769	-0.6217	-0.3362	0.2156	0.9615	0.7456	0.103	1.4269	0.4462	0.6765	0.1208
B0UY61_K689k_1_1_689_689	B0UY61	A0A2R8QKU1|B0UY61	neb	K689k	AGQILSEkK	0	2.06295	9.09462e-07	0.000599639	1.12613	0.00111747	0.0332231	-2.32763	8.00958e-09	1.26992e-05	-2.30405	2.26537e-08	4.78825e-05	1.1482	1.7286	0.9054	1.8795	0.227	0.1678	0.6309	-0.6063	-0.6632	-0.2351	-1.0855	-0.6505	-0.5891	-0.7544	-1.1429
B0UY61_K91k_1_1_91_91	B0UY61	A0A2R8QKU1|B0UY61	neb	K91k	KAQEQLSEVkYR	0	1.03266	0.000610086	0.0148523	0.764817	0.00577118	0.0866306	-2.32763	8.00958e-09	1.26992e-05	-2.30405	2.26537e-08	4.78825e-05	0.8884	1.5371	0.978	0.991	0.1654	0.1476	0.5992	-0.0017	-0.0456	0.2452	NA	-0.2536	-0.2483	-0.6287	-0.7124
B0UYH2_K426k_1_1_426_426	B0UYH2	B0UYH2	eif2d	K426k	NIITEYVkK	0	-1.1207	0.0759107	0.240071	-0.35655	0.574925	0.843276	-0.174993	0.308514	0.44458	-0.117209	0.522429	0.743931	0.5948	0.1138	-0.3951	NA	-0.9615	-0.9873	NA	2.2368	0.2136	NA	NA	NA	-0.3343	NA	-0.9014
B0UYH7_K385k_1_1_385_385	B0UYH7	B0UYH7	glmna	K385k	GLkVFQLSIDK	0	0.448875	0.287514	0.496901	0.241217	0.511071	0.802057	0.0573694	0.811426	0.871603	-0.358127	0.183041	0.419923	-0.3139	0.1335	-0.5086	0.2993	0.5618	0.6861	-0.3222	-0.0161	-1.0765	NA	NA	-0.2734	0.2915	-0.3091	0.5604
B0UYM8_K1179k_1_1_1179_1179	B0UYM8	B0UYM8|B0UYM5	lmo7a	K1179k	ISLNQkPNSSR	0	0.107025	0.704866	0.837372	0.550525	0.0857787	0.370705	0.13591	0.650242	0.751839	0.65801	0.05808	0.217406	-0.2382	-0.5875	0.0713	-0.0582	0.9704	0.4824	0.3796	0.0913	0.0823	-0.6086	-0.8057	0.6025	0.1567	-0.2942	-0.2239
B0UYM8_K1344k_1_1_1344_1344	B0UYM8	B0UYM8	lmo7a	K1344k	ESISLkNLK	0	-0.281117	0.520923	0.707925	0.0947333	0.827607	0.950927	0.13591	0.650242	0.751839	0.65801	0.05808	0.217406	0.299	0.3595	-0.1189	-0.5026	0.2378	0.2438	0.4284	0.87	-0.8549	0.856	NA	0.971	-0.0836	-0.4922	0.4392
B0UYS0_K146k_1_1_146_146	B0UYS0	B0UYS0	krt15	K146k	IRQFLESkTSPAAR	0	0.40225	0.317399	0.532272	0.3182	0.489212	0.789153	-0.156489	0.66064	0.759981	-0.937664	0.0271779	0.134156	0.9347	0.8407	0.7386	-0.4417	-0.218	0.1834	0.8859	-0.1745	-0.7377	0.4637	0.9118	NA	-0.2224	0.1907	-0.0716
B0UYS0_K289k_1_1_289_289	B0UYS0	B0UYS0	krt15	K289k	EQYENVAAkNQR	0	-0.194633	0.618929	0.775326	0.0782917	0.810251	0.947374	-0.156489	0.66064	0.759981	-0.937664	0.0271779	0.134156	-2.3229	-0.8497	-1.9644	NA	0.2853	0.6342	0.2225	-1.5048	NA	-1.5306	NA	0.083	0.2054	0.4031	0.518
B0UYS0_K301k_1_1_301_301	B0UYS0	B0UYS0	krt15	K301k	DLENWFQTkSETLTK	0	-0.34205	0.238711	0.452927	-0.532942	0.0757493	0.352027	-0.156489	0.66064	0.759981	-0.937664	0.0271779	0.134156	0.2986	-0.2093	-0.5134	-0.3337	-0.5593	-0.0911	0.1765	-0.2374	0.0823	0.6129	NA	0.1603	0.2758	0.6649	0.3989
B0UYS0_K344k_1_1_344_344	B0UYS0	B0UYS0	krt15	K344k	kASLEGTLADTEAR	0	0.0799667	0.76839	0.879558	0.0134333	0.960485	0.991969	-0.156489	0.66064	0.759981	-0.937664	0.0271779	0.134156	0.0742	0.1123	0.2775	0.0268	0.2624	-0.0206	-0.065	0.6707	0.0128	-0.5553	NA	0.2097	0.1437	-0.28	0.1086
B0UYS0_K397k_1_1_397_397	B0UYS0	Q1LXJ8|A0A0N4SUF2|F1Q7G3|B0UYS0|O77727	krt15	K397k	MLLDIkTR	0	-0.423683	0.562301	0.737274	-0.945867	0.13769	0.462125	-0.156489	0.66064	0.759981	-0.937664	0.0271779	0.134156	-0.6	-1.9125	NA	NA	0.5597	-2.3179	-0.2907	-0.7496	-0.3745	-1.3736	NA	0.7637	0.0677	-0.4095	0.6297
B0UYS4_K40k_1_1_40_40	B0UYS4	B0UYS4	dera	K40k	kQWQAAWLLK	0	-0.169267	0.741848	0.864086	NA	NA	NA	-0.100499	0.592801	0.705885	0.111519	0.582851	0.788029	0.451	NA	-0.1353	0.9423	NA	NA	NA	NA	0.5886	NA	NA	NA	-0.4384	NA	-0.4436
B0V1K4_K137k_1_1_137_137	B0V1K4	B0V1K4	B0V1K4_K137k_1_1_137_137	K137k	FSTYMAkVR	0	-0.379225	0.206741	0.413273	-0.408758	0.207637	0.553281	0.664853	0.266428	0.399547	-0.223906	0.723029	0.873286	-0.0299	-0.4052	0.2679	0.4707	-0.0515	-0.3678	0.0985	0.9727	0.6764	-0.4243	0.5956	0.127	0.1408	0.4143	0.5252
B2GTW6_K339k_1_1_339_339	B2GTW6	B2GTW6	cs	K339k	MRDYIWNTLkSGR	0	NA	NA	NA	0.9709	0.032207	0.227292	0.857969	9.73765e-05	0.00249423	0.415284	0.0272344	0.134156	NA	NA	-0.6383	-0.1402	-0.2004	0.5376	-0.1665	NA	NA	NA	NA	NA	-0.61	NA	-1.218
B3DFN3_K255k_1_1_255_255	B3DFN3	B3DFN3	lmnb2	K255k	QHEEQVQIYkEELQHTFK	0	-0.281425	0.346084	0.561341	0.0228167	0.942761	0.989668	0.498176	0.00241627	0.0167658	0.31005	0.0494549	0.196521	0.2418	0.018	-0.0798	-0.593	0.5397	0.1865	0.1941	0.3244	0.627	0.54	-0.7787	0.4509	0.4074	0.12	0.1575
B3DFN3_K263k_1_1_263_263	B3DFN3	B3DFN3	lmnb2	K263k	EELQHTFkAK	0	0.010175	0.96599	0.984986	0.179217	0.490391	0.789153	0.498176	0.00241627	0.0167658	0.31005	0.0494549	0.196521	-0.3345	-1.0581	-1.0172	-0.2089	0.3801	0.7367	0.5559	-0.4321	-0.8946	-0.9203	-0.4124	0.3784	0.5601	0.324	0.2509
B3DFN3_K265k_1_1_265_265	B3DFN3	B3DFN3	lmnb2	K265k	AkLDNAK	0	0.460733	0.315994	0.530373	1.75347	0.00141678	0.0385659	0.498176	0.00241627	0.0167658	0.31005	0.0494549	0.196521	0.2238	-0.3033	-0.4133	1.104	-0.3874	1.4731	0.513	0.2568	-0.4881	-0.6925	NA	-1.4564	-1.4254	-1.2853	-0.7152
B3DFN3_K270k_1_1_270_270	B3DFN3	B3DFN3	lmnb2	K270k	AKLDNAkVSSDLNDK	0	-0.33365	0.112858	0.296852	0.0392667	0.856904	0.96106	0.498176	0.00241627	0.0167658	0.31005	0.0494549	0.196521	0.3567	0.3327	0.2772	0.1252	0.0525	0.233	-0.1638	0.6971	0.9849	0.5057	0.2387	0.167	-0.1824	0.0289	-0.0083
B3DFN3_K278k_1_1_278_278	B3DFN3	B3DFN3	lmnb2	K278k	VSSDLNDkAVLTAR	0	-0.299175	0.318838	0.534006	-0.491658	0.137506	0.462125	0.498176	0.00241627	0.0167658	0.31005	0.0494549	0.196521	0.2051	-0.3344	-0.1814	-1.0492	0.0528	0.2283	-0.0226	0.1521	-0.1051	0.38	-0.5902	0.0081	0.6846	0.7639	0.8547
B3DFN3_K482k_1_1_482_482	B3DFN3	B3DFN3	lmnb2	K482k	RQIGDGEEIVYkFSPK	0	1.13125	0.000284265	0.00995178	0.410492	0.104112	0.403268	0.498176	0.00241627	0.0167658	0.31005	0.0494549	0.196521	0.0189	0.5241	0.3412	0.3228	0.4274	0.5064	0.2586	-0.58	-1.0667	-0.8418	NA	0.2676	0.0242	-0.5037	0.1598
B3DFN3_K486k_1_1_486_486	B3DFN3	B3DFN3	lmnb2	K486k	FSPkFVLK	0	-0.022125	0.923152	0.96639	0.199367	0.425914	0.744626	0.498176	0.00241627	0.0167658	0.31005	0.0494549	0.196521	0.6532	0.7347	0.3055	0.6274	-0.0548	0.6778	-0.09	0.5654	0.2339	0.93	0.68	-0.262	0.0107	0.0254	0.1391
B3DFN3_K540k_1_1_540_540	B3DFN3	B3DFN3	lmnb2	K540k	SQSSWGTGENILTLLVNSSGEDVAkR	0	NA	NA	NA	NA	NA	NA	0.498176	0.00241627	0.0167658	0.31005	0.0494549	0.196521	NA	NA	NA	NA	NA	NA	NA	NA	NA	NA	NA	NA	-0.3517	NA	-0.4332
B3DFN3_K61k_1_1_61_61	B3DFN3	B3DFN3	lmnb2	K61k	VSEkEEVTTR	0	-0.741475	0.049586	0.194028	0.0308083	0.93563	0.989668	0.498176	0.00241627	0.0167658	0.31005	0.0494549	0.196521	-0.239	-0.2361	-0.8046	-1.3142	0.0493	1.3357	-0.6118	-0.0489	0.2262	0.2676	-0.0729	0.1341	0.4311	0.222	0.1205
B3DFN3_K73k_1_1_73_73	B3DFN3	B3DFN3	lmnb2	K73k	EVSGIkSLYEAELADARR	0	0.115183	0.788041	0.890457	0.316775	0.463486	0.770235	0.498176	0.00241627	0.0167658	0.31005	0.0494549	0.196521	0.3312	0.788	0.3638	-0.1048	0.131	0.2719	0.0873	0.1384	-0.0951	NA	0.6448	-1.5811	0.1793	0.1725	0.6158
B3DFN3_K96k_1_1_96_96	B3DFN3	B3DFN3	lmnb2	K96k	AkLQIELGK	0	0.083525	0.701861	0.834555	0.0201417	0.93173	0.988465	0.498176	0.00241627	0.0167658	0.31005	0.0494549	0.196521	0.3728	0.277	0.4014	0.2714	0.3325	0.073	0.0228	0.5866	0.4435	0.3477	-0.3893	0.1469	0.0792	0.0145	0.2499
B3DFS9_K142k_1_1_142_142	B3DFS9	A0A0R4IJY6|A0A2R8QJR6|B3DFS9	myh11a	K142k	IIEMYkGK	0	-1.02058	0.0278695	0.138334	0.00495833	0.991411	0.995345	-0.76533	0.0112073	0.0452431	0.137579	0.630581	0.820545	-0.2462	1.3118	-0.1313	0.1143	-0.3188	0.6035	-0.7043	0.4907	0.7764	1.7326	2.1312	-0.6328	0.1093	-0.118	0.0622
B3DH78_K659k_1_1_659_659	B3DH78	A0A0H2UKX0|B3DH78	caska	K659k	LENTkNGTAGLIPSPELQEWR	0	-0.81745	0.110774	0.294045	-0.242033	0.425767	0.744626	-0.413463	0.0167326	0.0593255	0.0110806	0.946656	0.978453	NA	NA	-0.48	0.4815	-0.3752	-0.3361	0.2666	NA	NA	0.8182	NA	0.1573	0.0982	0.1777	-0.058
B3DI58_K140k_1_1_140_140	B3DI58	B3DI58	ngs	K140k	LAVYIEkVR	0	1.03182	0.0348612	0.154422	-0.0165417	0.970667	0.992673	0.0716389	0.86517	0.909181	-0.0354793	0.937916	0.975611	1.0552	-1.0417	0.329	0.618	0.2721	-0.1987	0.3335	-0.4883	-0.3351	-1.5517	NA	-0.1766	0.7144	-0.1112	0.1821
B3DI58_K342k_1_1_342_342	B3DI58	B3DI58	ngs	K342k	EEIMGYkK	0	-0.495133	0.115529	0.299625	0.311375	0.309274	0.654454	0.0716389	0.86517	0.909181	-0.0354793	0.937916	0.975611	-0.4246	-0.0901	-0.2305	0.1592	0.4292	-0.2536	0.7676	0.3908	0.5019	0.1532	NA	0.3644	-0.4075	-0.3617	0.4169
B3DIV8_K761k_1_1_761_761	B3DIV8	A0A2R8Q7U6|B3DIV8	itgb3a	K761k	AkWEAANNPLYK	0	0.288925	0.190009	0.394374	-0.120842	0.60287	0.856823	0.223686	0.0420419	0.110635	-0.129508	0.247937	0.496108	0.6336	0.8831	0.4	0.5058	0.097	-0.0722	-0.0949	0.8133	0.1683	0.3317	-0.0465	0.2187	-0.09	0.0369	0.2243
B3DJR0_K1106k_1_1_1106_1106	B3DJR0	A0A2R8QKP3|B3DJR0	cmya5	K1106k	AYEEIHGGGISLSkNK	0	0.3664	0.326378	0.541967	-0.184108	0.643742	0.881191	0.44079	0.000483192	0.00630993	0.0730378	0.489548	0.717842	0.9186	0.0939	0.6292	0.9678	0.4762	-0.32	-0.2541	-0.1775	0.4246	-0.2782	1.175	-0.4585	0.6592	0.6325	-0.2273
B3DJR0_K52k_1_1_52_52	B3DJR0	A0A2R8QKP3|B3DJR0	cmya5	K52k	EAVQDPSVkPK	0	-0.158808	0.654596	0.803718	0.359408	0.318382	0.662446	0.44079	0.000483192	0.00630993	0.0730378	0.489548	0.717842	-0.3362	-0.696	0.0621	0.1442	0.5322	0.3041	0.0863	NA	-0.2728	-0.5272	0.657	0.5375	0.2544	-0.621	-0.3784
B3DK63_K192k_1_1_192_192	B3DK63	B3DK63	B3DK63_K192k_1_1_192_192	K192k	YERLLEGNkPNQNETLLNR	0	-0.46705	0.13351	0.3227	-1.75117	3.34272e-05	0.00400362	0.645914	0.0182967	0.0632701	1.01672	0.00174423	0.0248543	-0.3816	NA	-0.1748	-0.6433	-0.3013	-0.8902	-0.814	-0.3265	0.7703	-0.4535	0.2783	1.0944	1.3076	1.0049	0.9238
B3DKD9_K137k_1_1_137_137	B3DKD9	F1R272|A0A2R8QCE9|F6NM27|Q9DEA0|B3DKD9	B3DKD9_K137k_1_1_137_137	K137k	NASAVMkNQVAR	0	-0.018125	0.951876	0.977322	0.137042	0.606733	0.860902	0.241678	0.168759	0.289888	0.611715	0.00467261	0.0445592	0.4565	0.2155	-0.4806	0.4987	-0.0629	0.0753	0.076	0.0068	0.3745	NA	NA	-0.1995	0.01	-0.3218	0.081
B3DKJ0_K55k_1_1_55_55	B3DKJ0	B3DKJ0	cct7	K55k	GkATISNDGATILK	0	-0.6646	0.123854	0.310395	0.301442	0.504121	0.796505	0.3721	0.0778748	0.170374	-0.0707086	0.741437	0.88202	-0.1321	-0.1168	0.2557	0.2591	0.0192	0.7317	-0.2599	-0.1607	0.1089	1.5375	1.4386	-0.174	0.8044	-0.6003	-0.5812
B5DE31_K117k_1_1_117_117	B5DE31	B5DE31	ybx1	K117k	GAEAANVTGPGGVPVQGSkYAADR	0	0.11535	0.808875	0.904106	-0.371867	0.440047	0.755706	-0.184766	0.738312	0.818311	0.341531	0.569162	0.780632	-0.8202	-0.7766	-0.8083	-0.0115	0.4171	0.7751	-0.3044	0.1788	-0.2975	-2.0398	NA	-0.065	0.9955	1.0196	0.7211
B5DE31_K44k_1_1_44_44	B5DE31	B5DE31	ybx1	K44k	VLGTVkWFNVR	0	0.091925	0.796075	0.894679	-0.0955917	0.803497	0.943942	-0.184766	0.738312	0.818311	0.341531	0.569162	0.780632	0.9927	-0.5517	1.1293	0.4233	-0.3856	0.3783	0.3563	0.217	0.4675	0.3664	0.575	-0.5234	0.276	0.5671	0.528
B5DE31_K72k_1_1_72_72	B5DE31	B5DE31	ybx1	K72k	EDVFVHQTAIkK	0	0.416667	0.238734	0.452927	-0.487967	0.171491	0.50769	-0.184766	0.738312	0.818311	0.341531	0.569162	0.780632	-0.5823	-1.2653	-0.7243	-0.0929	0.4217	0.4023	0.2144	-0.4038	-1.0014	-1.8434	NA	1.069	1.1233	0.5097	0.6344
B7ZD34_K83k_1_1_83_83	B7ZD34	B7ZD34|B7ZD32|Q642J7	rps24	K83k	TTGFGMIYDSLDYAkK	0	-0.7873	0.0862325	0.257461	-0.542425	0.194827	0.533861	0.638323	0.0166188	0.0590843	1.03049	0.001255	0.0198453	-0.3747	NA	0.4353	-1.0099	0.4484	-0.4641	-0.2651	1.2443	0.3054	-0.1371	NA	0.2786	0.347	0.9299	0.2398
B7ZD39_K229k_1_1_229_229	B7ZD39	B7ZD39	ppa1b	K229k	ATHGFWkALLSQQTNAGELNCK	0	0.736475	0.175675	0.378317	0.3123	0.58513	0.848144	-0.201992	0.223252	0.352308	-0.143119	0.416509	0.660188	0.6809	0.8672	0.9229	0.959	-0.3453	0.2174	0.4159	-0.6776	-1.1671	0.9783	1.3505	-1.5736	0.1369	0.1952	0.3763
B7ZD40_K182k_1_1_182_182	B7ZD40	B7ZD40	sar1ab	K182k	ELNLRPMEVFMCSVLkR	0	-0.893575	0.116688	0.300968	-0.766633	0.0707358	0.340341	1.97337	2.54273e-05	0.00118573	1.99618	4.83652e-05	0.00283967	0.3354	0.8692	0.5	0.3959	-1.5141	-0.5251	-0.3691	NA	NA	1.4187	NA	NA	-0.6495	-0.0636	0.6047
B7ZDA6_K1727kK1732k_2_2_1727_1732	B7ZDA6	B7ZDA6	lamb2	K1727k K1732k	GLLkDAQDk	0	-2.1164	0.11827	0.30205	-1.7683	0.141782	0.467255	0.69694	0.00268228	0.0178654	0.45869	0.0418597	0.176484	-2.1341	-1.9116	-2.2081	NA	-2.2093	-3.2651	-1.8493	-0.047	0.1106	NA	NA	2.8767	-2.3568	NA	-2.5387
B7ZV06_K118k_1_1_118_118	B7ZV06	Q7ZW25|B7ZV06	chmp2a	K118k	QLkLPQIQK	0	-0.527125	0.059601	0.213284	-0.167033	0.558984	0.830351	0.488255	0.00991832	0.0417399	-0.28665	0.124536	0.338193	-0.1431	-0.3569	-0.2369	-0.1384	0.1579	0.4948	-0.36	0.0127	-0.1145	0.7592	0.5758	0.6018	0.4968	0.1071	-0.1473
B7ZV06_K52k_1_1_52_52	B7ZV06	Q7ZW25|B7ZV06	chmp2a	K52k	MAkQGQMDAVK	0	0.79225	0.0234011	0.125101	0.190375	0.583019	0.847145	0.488255	0.00991832	0.0417399	-0.28665	0.124536	0.338193	-0.7253	-0.0323	-0.1311	-0.4695	0.3201	0.8899	0.4922	-1.558	-0.6245	-0.5079	-1.8368	0.5566	0.8211	-0.0746	0.205
B8A446_K2030k_1_1_2030_2030	B8A446	B8A446	abca1a	K2030k	EVCkVADWGIRK	0	0.226925	0.586936	0.75387	-0.06425	0.886227	0.972477	0.10393	0.66987	0.76666	0.135408	0.607675	0.804944	0.358	0.1862	1.3574	0.9755	-0.4302	-0.5036	0.5588	-0.1086	-0.0537	0.9136	1.2181	-0.9722	0.65	-0.046	0.1252
B8A446_K2043k_1_1_2043_2043	B8A446	B8A446	abca1a	K2043k	LGLMkYVDK	0	0.04925	0.916326	0.963067	-0.5253	0.308034	0.65315	0.10393	0.66987	0.76666	0.135408	0.607675	0.804944	-0.5037	-0.0562	1.601	0.8102	-0.3387	-1.0717	0.364	-0.2195	-0.1929	0.779	1.2877	-0.234	0.6305	0.1134	0.1961
B8A446_K2203k_1_0_2203_2205	B8A446	B8A446	abca1a	K2203k	IFNILSkNK	1	-0.392775	0.353846	0.568572	-0.610558	0.188692	0.52881	0.10393	0.66987	0.76666	0.135408	0.607675	0.804944	-0.4581	0.7982	1.3169	0.7433	-0.9815	-1.0019	0.2502	1.0687	0.5047	1.1905	1.2075	-0.3881	0.9133	-0.5588	0.1649
B8A4A6_K23k_1_1_23_23	B8A4A6	B8A4A6|B8A4A7|Q568R9	sncga	K23k	TkAGVEEAAAK	0	0.600775	0.032846	0.14939	0.208342	0.462317	0.769977	-1.06178	5.95228e-05	0.00193737	-1.24191	2.74132e-05	0.0020181	-0.2727	0.5949	0.4545	0.8481	0.4974	0.3964	0.2539	-0.354	-0.5866	0.0407	0.1216	-0.1409	0.4051	0.0687	0.364
B8A4A6_K32k_1_1_32_32	B8A4A6	B8A4A6|B8A4A7	sncga	K32k	AGVEEAAAkTK	0	-0.0652333	0.906492	0.956141	-0.07395	0.840546	0.956096	-1.06178	5.95228e-05	0.00193737	-1.24191	2.74132e-05	0.0020181	-0.0595	-0.324	-0.4257	NA	-0.0047	-0.5992	0.4005	NA	-0.2045	NA	NA	0.7353	-0.1511	-0.7474	0.1878
B8A4A6_K43k_1_1_43_43	B8A4A6	B8A4A6|B8A4A7	sncga	K43k	EGVMYVGTkTK	0	0.5054	0.0274139	0.137452	0.17805	0.43818	0.754699	-1.06178	5.95228e-05	0.00193737	-1.24191	2.74132e-05	0.0020181	-0.1261	0.1535	-0.0754	-0.0906	0.4298	0.345	0.4594	-0.3021	-0.282	-0.6057	-0.9704	0.3778	0.4535	-0.141	0.2431
B8A4U0_K202k_1_1_202_202	B8A4U0	B8A4U0|B8A4U1	cd99	K202k	VQGGEDPESGkSHGTNSEPQVLSNLLR	0	1.47845	0.0944138	0.270208	0.295392	0.745828	0.923091	0.313815	0.00714275	0.0339231	0.0711818	0.514055	0.737029	0.1848	-0.1416	0.5561	0.2903	-0.89	0.3388	0.7257	-1.8573	-2.1647	-0.7157	-0.2865	-3.6613	0.5118	0.9816	1.219
B8A4V2_K235k_1_1_235_235	B8A4V2	B8A4V2	anxa11a	K235k	AMkGFGTDEQAIINLLGSR	0	0.864467	0.0937981	0.269474	-0.444433	0.400498	0.729966	0.30579	0.0555664	0.134917	-0.0803582	0.61718	0.810549	0.1017	0.7242	0.5022	-0.0669	-0.3437	0.184	0.1958	-2.0431	NA	0.6603	-0.2647	NA	0.2784	0.4706	0.6204
B8A4V2_K336k_1_1_336_336	B8A4V2	B8A4V2|Q7T391	anxa11a	K336k	EINQVFkAENKK	0	-0.448275	0.0299625	0.142964	-0.0184	0.928642	0.987285	0.30579	0.0555664	0.134917	-0.0803582	0.61718	0.810549	-0.4039	-0.1255	-0.4505	-0.2653	0.2512	0.4185	0.1367	0.3152	0.1507	0.1116	-0.0296	0.5605	0.4108	0.0287	0.1488
B8A4V2_K399k_1_1_399_399	B8A4V2	B8A4V2|Q7T391	anxa11a	K399k	LGTDESkFNAILCAR	0	-0.332233	0.206654	0.413273	-0.0384	0.880563	0.969105	0.30579	0.0555664	0.134917	-0.0803582	0.61718	0.810549	0.2172	0.0557	-0.2792	-0.0621	0.2947	0.057	-0.0598	0.3184	-0.2119	0.8389	NA	0.2546	0.0292	0.0028	0.2562
B8A5D3_K498k_1_1_498_498	B8A5D3	B8A5D3	nars1	K498k	IWDSDELLEGYkR	0	-0.062425	0.779927	0.885632	-0.32755	0.187139	0.526795	0.119647	0.254484	0.385832	0.0446046	0.687309	0.853089	0.1274	-0.1684	0.0313	-0.2573	-0.0559	0.2416	0.0051	0.2122	0.1965	-0.2971	-0.1289	0.004	0.1529	0.6584	0.7493
B8A5L1_K307k_1_1_307_307	B8A5L1	B8A5L1|A0A0R4IFP3|A0A2R8Q4B1	ecpas	K307k	VYLGDIPLkTK	0	0.1845	0.415516	0.619827	0.0171417	0.943534	0.989668	0.499035	0.000565685	0.00688594	0.466792	0.00173863	0.0248303	-0.1526	-0.0943	-0.1826	0.0015	0.2686	0.4227	0.3874	0.0483	-0.1233	-0.0763	-1.0147	0.3368	0.2957	0.3882	0.349
B8A5L6_K301k_1_1_301_301	B8A5L6	B8A5L6|E9QCD1	fga	K301k	VITHTkDGPVEK	0	-0.395775	0.172441	0.374822	0.414908	0.153929	0.484075	0.19212	0.430192	0.562183	0.222209	0.399114	0.643965	-0.3124	0.6395	0.237	0.0184	0.0298	-0.3557	0.5891	0.7024	0.3682	0.5536	NA	-0.0532	-0.2991	-0.5431	-0.4133
B8A5Q4_K559k_1_1_559_559	B8A5Q4	B8A5Q4	efhc2	K559k	SISEEQQkK	0	-0.342025	0.676889	0.817391	0.571683	0.51132	0.802057	-0.419694	0.244007	0.374332	-0.367146	0.340947	0.593413	-1.5613	0.0002	-1.2507	-1.1455	0.0454	NA	-2.1771	-1.4769	0.1823	NA	NA	-0.4698	-1.3747	NA	-3.0681
B8A5V6_K107k_1_1_107_107	B8A5V6	B8A5V6	pdlim1	K107k	MNLAkTNTQEEK	0	-0.632333	0.0852559	0.255829	0.235683	0.471312	0.776322	0.116145	0.302657	0.43813	-0.200249	0.110556	0.316165	-0.2803	-0.0863	-0.8044	NA	-0.1955	0.7433	-0.4349	0.5541	0.4504	-0.2785	NA	-0.0078	-0.111	-0.3798	-0.2936
B8A6H7_K77k_1_1_77_77	B8A6H7	B8A6H7|B8A6H6	znf330	K77k	CMkSSDCVIK	0	-0.1849	0.532017	0.714714	-0.2127	0.506067	0.798248	-0.237474	0.224488	0.353333	0.208236	0.319281	0.573374	-0.6399	0.5606	0.2334	0.0997	-0.1872	0.5109	-0.5097	0.3538	0.0192	-0.011	0.6314	0.3744	0.3873	-0.0681	-0.0908
B8JHR9_K552k_1_1_552_552	B8JHR9	B8JHR9	kpnb3	K552k	GkTIECISLIGLAVGK	0	1.31103	0.0194434	0.111799	-0.8805	0.118085	0.426398	-0.376686	0.0677756	0.155624	-0.00961933	0.963109	0.985201	0.1914	-0.6138	0.1857	0.4643	-1.4817	0.3043	0.6662	-1.7073	-1.7698	-0.2853	NA	NA	0.6675	0.6472	0.8156
B8JI86_K121k_1_1_121_121	B8JI86	B8JI86	trim63b	K121k	QQQEGGGGGGGSTTESPIKPkSSK	0	0.99375	0.000895775	0.0187497	0.0695667	0.792982	0.941694	0.847979	0.000419776	0.0058382	0.693386	0.00349595	0.0381859	0.8702	0.8994	0.6815	0.7485	-0.0942	0.322	-0.1151	0.112	0.0457	0.0263	-0.9594	0.1618	-0.1404	0.0792	-0.2286
B8JI86_K124k_1_1_124_124	B8JI86	B8JI86	trim63b	K124k	SSkELMCQEHEDEK	0	1.12147	0.00703273	0.062661	0.343692	0.390402	0.722865	0.847979	0.000419776	0.0058382	0.693386	0.00349595	0.0381859	0.7147	1.1946	0.1589	0.9794	-0.2554	0.8925	0.3492	-0.1023	-1.4306	0.3496	-0.255	-0.1416	0.1377	0.2587	-0.3145
B8JI86_K293k_1_1_293_293	B8JI86	B8JI86	trim63b	K293k	NLISQTkDAAK	0	0.721225	0.0317446	0.146456	0.313517	0.317549	0.661942	0.847979	0.000419776	0.0058382	0.693386	0.00349595	0.0381859	0.1451	0.3152	-0.2087	0.2285	0.1689	0.5222	0.4074	-0.7879	-0.3817	-0.634	NA	0.8301	0.294	-0.4023	-0.5112
B8JI86_K297k_1_1_297_297	B8JI86	B8JI86	trim63b	K297k	DAAkSSLAEERPEPGFER	0	0.92295	0.345181	0.560566	0.0770667	0.940939	0.989668	0.847979	0.000419776	0.0058382	0.693386	0.00349595	0.0381859	0.5891	-0.0731	0.367	0.3241	-2.0105	0.814	0.6528	-1.0878	-2.5377	-0.1207	1.2615	-3.3724	1.0366	0.2217	1.0809
B8JIH2_K219k_1_1_219_219	B8JIH2	B8JIH2|F6NHA0	vcla	K219k	CTkSHGVEEALK	0	0.087175	0.679207	0.81894	0.907642	0.00100592	0.0317053	0.441244	0.0102268	0.0424742	-0.0107766	0.94682	0.978453	0.0957	0.3605	-0.0769	0.2428	0.9099	0.487	0.5872	-0.0349	0.0097	0.3536	-0.055	-0.1285	-0.6402	-0.2692	0.0528
B8JIH2_K700k_1_1_700_700	B8JIH2	B8JIH2|F6NHA0	vcla	K700k	NPGNQAAYEHFDTMkNQWIDNIEK	0	-0.301325	0.519349	0.706515	-0.350758	0.487912	0.789146	0.441244	0.0102268	0.0424742	-0.0107766	0.94682	0.978453	-0.3866	-0.0355	-1.169	-1.5947	0.7444	-0.3243	0.6094	0.0639	0.3761	-0.7086	-1.7119	0.997	1.074	0.7459	-0.0412
B8JIH2_K785k_1_1_785_785	B8JIH2	B8JIH2|F6NHA0	vcla	K785k	FRELVkAASDELGR	0	0.697258	0.0516302	0.197275	1.29211	0.00146376	0.0388852	0.441244	0.0102268	0.0424742	-0.0107766	0.94682	0.978453	0.3777	-0.5608	-0.7807	0.2607	1.089	1.1203	0.8133	-0.927	-0.4666	-1.2255	NA	-0.6008	0.1641	-0.0262	-0.6754
B8JIS1_K244k_1_1_244_244	B8JIS1	B8JIS1	atp5pb	K244k	VLAkSTQAR	0	-1.02228	0.000929129	0.0191439	0.0532833	0.830973	0.952279	0.925174	0.00225283	0.0161989	0.923359	0.00389438	0.0403655	0.1755	0.1153	0.23	-0.4331	-0.2709	-0.0196	0.1112	1.3008	0.6231	1.2087	NA	0.0058	-0.0458	-0.394	-0.0182
B8JIS5_K198k_1_1_198_198	B8JIS5	B8JIS5	gstm.3	K198k	IVAYMkSNK	0	0.024725	0.962002	0.982576	0.362742	0.433621	0.751133	0.0665772	0.803157	0.865527	0.00404536	0.988798	0.99386	0.0028	-1.5481	-0.2226	-1.4144	-0.2836	1.3578	0.2475	NA	-0.8185	-0.8221	NA	-0.3533	0.6188	-0.0258	0.0716
B8JIS8_K135k_1_1_135_135	B8JIS8	B8JIS8	gstm.1	K135k	LSGTLkQFSDFLGDRK	0	-0.138175	0.58837	0.754732	-0.140475	0.610274	0.862084	-0.14688	0.618953	0.727599	-0.088096	0.781689	0.904238	0.5874	0.5262	-0.0164	0.2073	-0.2991	0.4009	0.1736	0.8798	0.1681	0.0261	0.7832	0.1544	0.149	0.5295	0.0962
B8JIS8_K178k_1_1_178_178	B8JIS8	B8JIS8|A8KBR8	gstm.1	K178k	MFEPACLDDFkNLR	0	NA	NA	NA	0.2488	0.530018	0.811702	-0.14688	0.618953	0.727599	-0.088096	0.781689	0.904238	0.2683	NA	-0.7765	0.424	NA	0.1667	0.2455	NA	NA	NA	NA	NA	-0.1027	-0.0736	0.0482
B8JIS8_K198k_1_1_198_198	B8JIS8	B8JIS8|A8KBR8	gstm.1	K198k	IAEYMkSNR	0	0.21505	0.548503	0.725469	0.221142	0.567622	0.836958	-0.14688	0.618953	0.727599	-0.088096	0.781689	0.904238	0.4898	0.8876	0.2918	0.5449	0.4327	-0.1212	0.013	1.1523	0.797	0.3844	-0.9798	-0.238	-0.0765	-0.0252	-0.1122
B8JIS8_K50k_1_1_50_50	B8JIS8	B8JIS8	gstm.1	K50k	SCWFNEkSK	0	-0.514925	0.159392	0.358229	0.351658	0.36406	0.701827	-0.14688	0.618953	0.727599	-0.088096	0.781689	0.904238	0.3466	0.7448	0.1747	0.2563	0.3864	-0.0104	-0.282	0.8918	0.6847	1.021	0.9846	0.4191	0.0825	-1.6292	-0.1537
B8JIS8_K52k_1_1_52_52	B8JIS8	B8JIS8	gstm.1	K52k	SkLGMDFPNLPYLEDGDRK	0	-0.210325	0.386851	0.595618	-0.0424583	0.869937	0.966033	-0.14688	0.618953	0.727599	-0.088096	0.781689	0.904238	0.2542	0.1162	0.1192	0.5477	0.1998	-0.1304	0.0355	0.5133	0.0842	0.3168	0.9643	-0.3716	0.4754	0.0393	0.1666
B8JKC9_K831k_1_1_831_831	B8JKC9	A0A2R8PXN0|A0A2R8QIG3|B8JKC9	hk2	K831k	EVCSVVSkR	0	0.0182667	0.949942	0.976776	0.305608	0.302967	0.649126	0.280192	0.0522552	0.129144	0.219365	0.145317	0.368109	-0.0298	0.3381	0.1683	0.459	-0.208	0.4302	0.6113	0.2842	0.0912	0.2715	NA	0.6365	-0.0045	-0.5304	-0.2127
B8JKI4_K155k_1_1_155_155	B8JKI4	Q800G8|B8JKI4|X1WFC1|B8JKI3	mxb	K155k	VAVkGQPENIGDQIK	0	-0.8584	0.0658469	0.225687	0.582675	0.231635	0.583192	-0.709765	0.07419	0.164979	0.819274	0.0584494	0.218659	-1.6734	-1.8867	-0.9773	-0.9565	0.2869	1.7248	-1.0466	-0.209	-0.7192	-0.2387	-0.8934	-0.1132	-0.1791	-0.3846	-0.367
B8JKI4_K3k_1_1_3_3	B8JKI4	Q800G8|B8JKI4	mxb	K3k	MEkMSYTFSQQYEEK	0	0.115917	0.867715	0.93513	0.284067	0.683899	0.898302	-0.709765	0.07419	0.164979	0.819274	0.0584494	0.218659	-0.4793	-2.1464	0.0177	0.3362	-0.419	1.5123	-0.5027	-1.5917	-0.9535	0.4936	NA	-1.2562	0.0275	0.2382	0.6417
B8JKI4_K606k_1_1_606_606	B8JKI4	Q800G8|B8JKI4|X1WFC1	mxb	K606k	EDFDIGQkR	0	-0.0256	0.932734	0.971106	0.748225	0.0346027	0.233034	-0.709765	0.07419	0.164979	0.819274	0.0584494	0.218659	-0.384	0.3812	0.6849	1.4189	0.2287	0.7352	0.2109	0.6317	0.5345	0.6684	0.3688	-0.4229	-0.4414	-0.4288	-0.1334
B8JKI4_K619k_1_1_619_619	B8JKI4	Q800G8|B8JKI4|X1WFC1	mxb	K619k	RLMkAQNLLATY	0	NA	NA	NA	-0.228892	0.715759	0.907033	-0.709765	0.07419	0.164979	0.819274	0.0584494	0.218659	-1.2725	NA	-0.6031	NA	-1.3946	1.2272	-1.6931	NA	NA	NA	NA	-0.7223	0.0888	-0.4969	-0.4347
B8JKI4_K77k_1_1_77_77	B8JKI4	B8JKI4|B8JKI3	mxb	K77k	CPLELkMIR	0	0.186567	0.63393	0.787634	-0.218642	0.577379	0.844218	-0.709765	0.07419	0.164979	0.819274	0.0584494	0.218659	0.0687	0.2602	0.1112	-0.2597	-0.8328	0.8083	-0.0786	0.0388	-0.9921	0.5289	NA	0.2254	0.072	0.461	-0.0213
B8JKI4_K86k_1_1_86_86	B8JKI4	Q800G8|B8JKI4|X1WFC1	mxb	K86k	SKEDEkWHGR	0	-0.163567	0.714463	0.843958	1.34469	0.00585831	0.0866306	-0.709765	0.07419	0.164979	0.819274	0.0584494	0.218659	-0.0187	NA	0.2452	-0.7401	-0.0751	1.4329	-0.361	0.3281	-0.621	0.27	NA	-1.0506	-1.2026	-1.0263	-0.7702
B8JKN6_K140k_1_1_140_140	B8JKN6	B8JKN6|B8JKN7|A0A2R8QTQ3	ppiaa	K140k	HVVFGQVVEGLDVIkK	0	-0.154925	0.564097	0.737708	-0.09975	0.730044	0.915432	0.114327	0.618944	0.727599	0.241723	0.336911	0.590055	-0.2738	0.2868	-0.0931	0.1285	0.2846	0.6076	-0.0765	0.0747	-0.2162	0.2409	0.5687	0.5599	0.9287	-0.0532	0.0512
B8JKN6_K151k_1_1_151_151	B8JKN6	B8JKN6|B8JKN7|A0A2R8QTQ3	ppiaa	K151k	KVEGFGSSSGkTSAK	0	-0.724225	0.0153601	0.0975355	-0.114783	0.694077	0.90001	0.114327	0.618944	0.727599	0.241723	0.336911	0.590055	-0.1889	0.2086	-0.0651	0.28	-0.221	0.2514	-0.4148	0.2025	0.7948	1.0429	1.0913	0.299	0.3825	-0.4589	-0.276
B8JKN6_K82k_1_1_82_82	B8JKN6	B8JKN6|B8JKN7|A0A2R8QTQ3	ppiaa	K82k	SIYGNkFADENFNLK	0	-0.7078	0.0151506	0.0969833	-0.200817	0.482804	0.787965	0.114327	0.618944	0.727599	0.241723	0.336911	0.590055	-0.7558	-0.1396	0.0156	0.1793	0.008	0.0034	-0.0539	0.8173	0.879	-0.082	0.5164	0.4781	0.1911	-0.1719	0.2493
B8JKS7_K11k_1_1_11_11	B8JKS7	B8JKS7	atp1a1a.4	K11k	YkLAATSEDEAK	0	-0.3038	0.216198	0.42509	0.0594917	0.803496	0.943942	-0.232449	0.534509	0.656001	-0.721374	0.089987	0.277853	0.1775	0.3675	0.674	0.9278	0.1379	-0.2005	0.2635	0.9282	0.9087	0.6846	NA	-0.071	0.0914	-0.24	0.2495
B8JKS7_K445k_1_1_445_445	B8JKS7	B8JKS7|E9QIR0	atp1a1a.4	K445k	NVPILk	0	NA	NA	NA	NA	NA	NA	-0.232449	0.534509	0.656001	-0.721374	0.089987	0.277853	NA	NA	NA	NA	-1.8219	NA	NA	NA	-0.8817	NA	NA	NA	NA	NA	NA
B8JL29_K114k_1_1_114_114	B8JL29	B8JL29|B8JL30	hmgb2a	K114k	VkGDNPGISIGDIAK	0	-0.0468	0.827617	0.914934	-0.004475	0.984607	0.994333	0.364518	0.124798	0.235346	0.754631	0.0078258	0.0614716	0.0644	0.2206	-0.1658	0.269	0.2032	0.2187	-0.0532	0.2649	-0.0507	0.2899	0.0713	0.51	0.3269	-0.2955	-0.0319
B8JL29_K127k_1_1_127_127	B8JL29	B8JL29|B8JL30	hmgb2a	K127k	VKGDNPGISIGDIAkK	0	-0.345225	0.18091	0.384242	0.077	0.776001	0.935038	0.364518	0.124798	0.235346	0.754631	0.0078258	0.0614716	-0.1623	-0.2933	-0.8083	-0.1425	0.6026	0.7109	-0.1339	-0.0755	-0.1182	0.2044	-0.0362	0.7406	0.4086	0.1392	-0.0236
B8JL29_K135k_1_1_135_135	B8JL29	B8JL29|B8JL30	hmgb2a	K135k	LGEMWSkLSPK	0	-0.130375	0.586929	0.75387	0.271967	0.300502	0.648235	0.364518	0.124798	0.235346	0.754631	0.0078258	0.0614716	0.0092	0.1641	0.5936	0.4763	0.5041	0.4493	-0.0307	0.1034	0.1514	0.6193	0.8906	0.1717	0.1801	0.0462	-0.2556
B8JL29_K147k_1_1_147_147	B8JL29	B8JL29|B8JL30	hmgb2a	K147k	SPYEQkAMK	0	-0.654425	0.00385008	0.0449846	0.0438083	0.835446	0.954275	0.364518	0.124798	0.235346	0.754631	0.0078258	0.0614716	0.3329	0.7468	0.5946	0.1034	0.1076	-0.2107	-0.1512	1.163	0.9382	1.2688	1.0254	0.0202	-0.2195	-0.1526	-0.1624
B8JL29_K157k_1_1_157_157	B8JL29	B8JL29	hmgb2a	K157k	EKYEkDVAAYR	0	0.0823	0.853559	0.92775	0.112325	0.815645	0.948176	0.364518	0.124798	0.235346	0.754631	0.0078258	0.0614716	0.0798	0.1527	0.0932	0.0996	0.0522	0.6673	-0.0631	-0.8837	-0.022	0.301	0.7008	-1.4092	0.9076	0.1368	0.7907
B8JL29_K42k_1_1_42_42	B8JL29	B8JL29|B8JL30|B8JL31	hmgb2a	K42k	KNPGTSVNFSEFSkK	0	-0.25985	0.28287	0.4921	0.53605	0.0503335	0.282839	0.364518	0.124798	0.235346	0.754631	0.0078258	0.0614716	0.3695	0.2442	0.3104	0.1305	0.3477	0.748	0.2363	0.1842	0.1633	1.1366	0.6099	-0.2335	0.2034	-0.2141	-0.124
B8JL29_K75k_1_1_75_75	B8JL29	B8JL29|B8JL30|B8JL31	hmgb2a	K75k	EMkNYVPPK	0	-0.7471	0.0210685	0.117067	0.0403083	0.899368	0.978243	0.364518	0.124798	0.235346	0.754631	0.0078258	0.0614716	-0.7416	-0.611	-0.7486	-0.8588	0.6302	0.0931	-0.1184	0.3108	0.6335	-0.1365	-0.7794	0.6244	0.2309	-0.1814	-0.0286
B8JLJ3_K119k_1_1_119_119	B8JLJ3	B8JLJ3	ywhaz	K119k	STSPAESQVFYLkMK	0	0.61335	0.14231	0.336107	0.306258	0.485122	0.788192	0.895344	0.00156576	0.0129635	0.156033	0.530418	0.750483	0.6093	0.9545	0.5689	0.8169	0.0075	0.1086	0.3919	-0.6489	-0.4413	0.7418	0.8446	-1.3609	0.2321	0.4021	0.179
B8JLJ3_K11k_1_1_11_11	B8JLJ3	Q5PRD0|Q7T356|E9QJ96|F8W493|F1RBF6|B8JLJ3|Q6P102|Q803M8	ywhaz	K11k	AkLAEQAER	0	-1.48925	0.00865784	0.0704741	-0.421975	0.339763	0.685058	0.895344	0.00156576	0.0129635	0.156033	0.530418	0.750483	-1.8168	-2.5767	-1.1265	-2.3478	0.247	0.2147	-0.1812	0.4651	-1.4205	NA	NA	0.4396	0.7547	0.6984	0.1692
B8JLJ3_K137k_1_1_137_137	B8JLJ3	B8JLJ3	ywhaz	K137k	YLAEVATGDEkTNIIQK	0	-0.490325	0.0330425	0.14939	-0.6165	0.0154055	0.154364	0.895344	0.00156576	0.0129635	0.156033	0.530418	0.750483	-0.7527	-0.7849	-1.0037	-0.943	0.3463	-0.3203	0.0412	-0.1642	-0.2924	-0.6082	-0.4582	0.9558	0.7766	0.3905	0.4327
B8JLJ3_K49k_1_1_49_49	B8JLJ3	Q5PRD0|Q6PC29|Q7T356|E9QJ96|F1RBF6|B8JLJ3|E7F354|Q6P102	ywhaz	K49k	NLLSVAYkNVVGAR	0	1.87956	0.0171239	0.103895	-0.926033	0.23044	0.580881	0.895344	0.00156576	0.0129635	0.156033	0.530418	0.750483	0.0731	-1.1925	0.4805	0.1746	-2.1654	0.4775	0.3778	-0.4808	NA	-3.1223	-2.3838	NA	0.6805	0.2716	0.5159
B8JLJ3_K68k_1_1_68_68	B8JLJ3	B8JLJ3	ywhaz	K68k	VVSSIEQkTEGTDKK	0	-0.244725	0.343343	0.558267	-0.314817	0.262044	0.612365	0.895344	0.00156576	0.0129635	0.156033	0.530418	0.750483	-0.3501	-0.4031	-0.807	-0.8126	0.218	0.1362	0.0578	-0.0842	-0.6121	0.0517	-0.7493	0.9298	0.6507	0.1997	0.0284
B8JLJ8_K61k_1_1_61_61	B8JLJ8	A0A2R8Q139|F6PB84|B8JLJ8|Q7ZUT0	hnrpkl	K61k	NAGAVIGkGGK	0	-0.7481	0.00386763	0.045001	-0.36575	0.143657	0.469759	0.355444	0.00678989	0.0328212	0.308236	0.0227737	0.121966	-0.0027	-0.0719	0.5157	-0.0631	-0.0927	-0.3059	-0.4873	0.6629	1.0344	1.2211	0.452	0.1646	0.1768	-0.1204	0.0608
B8JLJ8_K67k_1_1_67_67	B8JLJ8	E9QGT0|A0A2R8Q139|F6PB84|B8JLJ8	hnrpkl	K67k	NIkALR	0	0.026775	0.951665	0.977322	0.419725	0.349718	0.6935	0.355444	0.00678989	0.0328212	0.308236	0.0227737	0.121966	-0.4013	0.5171	0.0432	0.4349	0.107	0.8488	-0.1092	-0.7159	-0.2008	1.2818	NA	-0.6624	0.4122	-0.3307	0.0308
B8JLK7_K27k_1_1_27_27	B8JLK7	Q803J8|B8JLK7	zc3h15	K27k	IIEDkTFGLK	0	-0.6613	0.117272	0.301446	-0.438467	0.119022	0.428465	-0.00935304	0.967868	0.977745	-0.439506	0.0976087	0.291547	-0.4715	NA	NA	NA	-0.357	-0.3712	-0.5057	0.2044	0.1752	NA	NA	NA	0.3261	-0.2263	-0.0183
B8JLR1_K637k_1_1_637_637	B8JLR1	B8JLR1	pdcd6ip	K637k	RQEELLSQIQVSHQEFSALkQSNSEANTR	0	-0.287417	0.437961	0.640571	-0.569817	0.0814486	0.360775	-0.168387	0.287804	0.422171	-0.218847	0.205294	0.445699	NA	0.0297	-0.1312	NA	-0.096	-0.4197	-0.3617	0.69	0.1048	-0.0848	NA	0.5371	0.8457	-0.0508	-0.2226
B8JLR1_K651k_1_1_651_651	B8JLR1	B8JLR1	pdcd6ip	K651k	QSNSEANTREDVLkK	0	-0.436175	0.0664074	0.226283	0.16005	0.511618	0.802057	-0.168387	0.287804	0.422171	-0.218847	0.205294	0.445699	-0.3773	0.3801	0.0768	0.2757	-0.1431	0.4301	0.0559	0.5565	0.363	0.4501	0.7304	0.0893	0.1823	-0.3565	-0.0981
B8JLS3_K744k_1_1_744_744	B8JLS3	B8JLS3	myh6	K744k	SAEkLLGSLDIDHTQYK	0	0.7273	0.114293	0.298248	0.5969	0.222069	0.570057	-0.773209	0.00110081	0.0103774	-1.03031	0.000191063	0.00644432	-0.3158	-0.4479	-0.3368	0.3837	0.2961	0.753	1.29	-0.4975	0.0533	-0.6913	-2.4905	-0.2757	0.4533	0.4912	0.0624
B8JLS3_K757k_1_1_757_757	B8JLS3	B8JLS3	myh6	K757k	LLGSLDIDHTQYkFGHTK	0	-0.8592	0.00398393	0.0455503	-0.240642	0.392696	0.724872	-0.773209	0.00110081	0.0103774	-1.03031	0.000191063	0.00644432	-0.7775	-0.534	-0.4607	0.189	-0.0661	0.3397	0.2851	0.3018	0.8643	0.5992	0.0883	0.0532	0.4373	0.4361	0.7809
B8JLW8_K606k_1_1_606_606	B8JLW8	B8JLW8	gmps	K606k	ESGYSSkISQMPVILTPLHFDRDPLQK	0	0.794475	0.058161	0.211281	0.236242	0.580795	0.847051	-0.0571195	0.62449	0.731668	-0.0196903	0.875322	0.944912	0.294	-0.1679	0.5153	0.2685	-0.1143	0.3431	0.9828	-0.6982	-0.4254	-0.2275	-0.9169	-1.2157	0.8046	0.3282	0.7534
B8JLZ3_K124k_1_1_124_124	B8JLZ3	B8JLZ3	anxa1b	K124k	AMkGLGTNEAVLSEILGTR	0	0.0149833	0.973421	0.988159	-0.226583	0.615994	0.865364	0.361312	0.132748	0.246021	-0.675377	0.0158491	0.0980482	-0.7526	-0.4296	-0.5176	-0.8788	-0.1083	0.4229	-0.0291	-0.0011	-0.749	-1.2288	NA	-1.1276	0.509	1.0105	0.8951
B8JM11_K293k_1_1_293_293	B8JM11	B8JM11	epcam	K293k	AQYSkAQAR	0	1.0423	0.21507	0.424045	-0.24425	0.661493	0.889284	0.592115	0.0109636	0.0446287	-0.357151	0.121283	0.332493	-0.9185	-0.8036	-1.5368	-0.0403	-0.3857	0.3369	-0.4075	NA	-1.8671	NA	NA	-1.3712	-0.266	0.9922	1.0136
B8JMC1_K173k_1_1_173_173	B8JMC1	B8JMC1	blvrb	K173k	YIVTENMLkGR	0	-0.53355	0.0202301	0.114428	0.08385	0.711007	0.905502	0.084145	0.630629	0.737226	-0.101381	0.592127	0.793801	0.6292	0.5068	0.4875	0.5562	-0.1802	0.1777	-0.2711	1.0525	1.0207	0.835	1.4057	-0.2361	-0.4843	0.2311	-0.2109
B8JMD7_K2910k_1_1_2910_2910	B8JMD7	B8JMD7	fryl	K2910k	FSVLELQEHLDTYNSkR	0	0.038575	0.896508	0.951125	0.454392	0.140921	0.466479	-0.175941	0.0910452	0.189314	-0.435567	0.00109695	0.0180817	0.4884	0.6983	-0.4654	0.535	0.0976	0.2964	0.5767	-0.1328	0.307	0.6523	NA	-0.1311	-0.3063	0.0736	-0.1595
B8JMZ1_K123k_1_1_123_123	B8JMZ1	B8JMZ1|A0A0R4IBN4|Q6NWJ8|F1QDY2	ugp2a	K123k	LNGGLGTSMGCkGPK	0	-0.041225	0.870652	0.93646	0.535508	0.0648129	0.324219	0.592966	0.00249742	0.0171357	0.302702	0.100273	0.29615	-0.1921	0.0602	-0.1895	0.0584	0.7305	0.7697	0.1667	-0.4743	0.1603	0.0792	0.1367	0.6702	-0.2978	-0.0685	-0.2234
B8JMZ1_K437k_1_1_437_437	B8JMZ1	B8JMZ1	ugp2a	K437k	LGSSFTkVR	0	-0.25945	0.440995	0.64242	0.178533	0.62143	0.870085	0.592966	0.00249742	0.0171357	0.302702	0.100273	0.29615	-0.1086	0.2641	-0.0984	-0.1068	0.4245	0.6807	-0.0968	0.8862	0.9058	-0.0197	-0.7842	0.3067	0.2455	-0.1566	0.2348
D1GJ56_K104k_1_1_104_104	D1GJ56	A0A2R8Q5Z6|D1GJ56	actn3a	K104k	IANVNkALDFISSK	0	-0.9414	0.00482528	0.0513811	-1.24049	0.00108789	0.0332231	-0.906961	4.15947e-05	0.00158912	-1.78432	6.29265e-08	6.90918e-05	-0.7185	-0.747	-0.5614	-1.2773	-0.1476	-0.0321	-0.9179	-0.2566	-0.27	0.2831	0.7049	0.4412	1.169	1.0816	0.8067
D1GJ56_K207k_1_1_207_207	D1GJ56	D1GJ56	actn3a	K207k	LRkDDPIGNLNTAFDIAEK	0	0.064375	0.832933	0.917128	0.07935	0.79494	0.941885	-0.906961	4.15947e-05	0.00158912	-1.78432	6.29265e-08	6.90918e-05	0.1482	-0.1753	0.3291	0.5399	-0.3859	0.5416	0.3261	-0.4352	0.2121	0.6614	NA	0.147	0.2418	0.1129	-0.1767
D1GJ56_K407k_1_1_407_407	D1GJ56	A0A2R8QDC7|A0A2R8Q5Z6|H9GX78|Q7SYE2|D1GJ56|B8JHU4	actn3a	K407k	LDHLAEkFR	0	0.197817	0.754406	0.872385	-0.3789	0.55092	0.826218	-0.906961	4.15947e-05	0.00158912	-1.78432	6.29265e-08	6.90918e-05	0.6384	-2.3442	0.1734	0.2046	0.3133	0.0372	-0.3139	-0.7913	0.7606	-1.5586	NA	0.3489	0.24	0.4571	0.5184
E7EXC4_K335k_1_1_335_335	E7EXC4	E7EXC4	serpinb14	K335k	FkMEQTYDMK	0	-0.186475	0.525272	0.711047	-0.3763	0.243058	0.593399	0.559144	0.00168598	0.013621	-0.240241	0.139846	0.360739	0.1467	-0.0587	-0.4673	-0.6127	0.5568	-0.2682	-0.2316	0.3062	0.032	0.1894	-0.7737	0.4124	-0.0105	0.5459	0.6334
E7EXN4_K176k_1_1_176_176	E7EXN4	E7EXN4	stx10	K176k	VLkDMSSR	0	0.4685	0.0147875	0.0952758	0.709975	0.00152736	0.0399276	-1.90186	3.55587e-06	0.000402415	-2.07557	3.18331e-06	0.000611679	0.6464	0.9031	0.9899	0.7426	0.4688	0.4265	0.1574	0.4253	0.405	0.2411	0.3366	-0.4244	-0.3728	-0.3568	-0.2823
E7EXW8_K1145k_1_1_1145_1145	E7EXW8	X1WHY3|E7EXW8	glg1a	K1145k	DRkGYIPIN	0	0.1816	0.666215	0.810937	-0.229567	0.44532	0.761331	-0.289693	0.115674	0.22368	-0.200528	0.299408	0.555942	-0.463	NA	0.3786	0.3508	-0.652	-0.3182	-0.3499	NA	-0.0928	NA	NA	-0.0849	-0.2805	NA	-0.266
E7EY36_K559k_1_1_559_559	E7EY36	E7EY36	si:ch73-269m14.2	K559k	LDQNVHEAMPSLkMTNDYIF	0	NA	NA	NA	-0.798633	0.127094	0.4411	3.2328	0.00380708	0.0220901	2.00883	0.0638605	0.229557	NA	NA	0.7885	NA	NA	-0.9639	NA	NA	NA	NA	NA	NA	-0.5258	-0.0923	0.1223
E7EYD0_K1230k_1_1_1230_1230	E7EYD0	E7EYD0	myom1a	K1230k	kDAGVYEVK	0	0.658575	0.195038	0.399364	0.0381667	0.942955	0.989668	-0.525644	0.00312689	0.0197321	-0.943529	4.50455e-05	0.00274648	0.4367	0.2924	0.508	-0.1009	0.1238	0.1935	-0.1074	0.8229	0.8303	-1.453	-1.6983	-0.0593	-0.397	0.2726	0.3109
E7EYD0_K1238k_1_1_1238_1238	E7EYD0	E7EYD0|F8W488	myom1a	K1238k	DAGVYEVkLK	0	0.0606	0.804371	0.900677	-0.141142	0.594667	0.851647	-0.525644	0.00312689	0.0197321	-0.943529	4.50455e-05	0.00274648	-0.2175	-0.3118	-0.8231	-0.3859	0.6613	0.6095	-0.182	-0.3255	-0.4497	-0.394	-0.8115	0.8319	0.3745	0.6064	0.2035
E7EYD0_K1326k_1_1_1326_1326	E7EYD0	E7EYD0|F8W488	myom1a	K1326k	ISHSDRVQCGVTGEQLWLkINEPTEK	0	1.25867	0.000453788	0.0126421	0.888117	0.0063155	0.0885437	-0.525644	0.00312689	0.0197321	-0.943529	4.50455e-05	0.00274648	0.7674	0.7006	-0.0932	0.16	0.1654	0.6355	0.918	-0.6557	-0.835	-1.1342	NA	-0.6206	-0.3357	0.0227	-0.327
E7EYD0_K1333k_1_1_1333_1333	E7EYD0	E7EYD0|F8W488	myom1a	K1333k	INEPTEkDK	0	-0.057425	0.792506	0.893253	-0.17695	0.456715	0.76674	-0.525644	0.00312689	0.0197321	-0.943529	4.50455e-05	0.00274648	0.3045	-0.3927	0.2532	0.257	0.0568	-0.2522	0.1957	0.154	0.5012	0.1105	-0.114	0.0453	0.1246	0.2241	0.3142
[truncated: 2,970 more rows]

## Sheet: Raw data
id.ub	klhl40.ko_1.5mo_r1	klhl40.ko_1.5mo_r2	klhl40.ko_1.5mo_r3	klhl40.ko_1.5mo_r4	klhl40.ko_4mo_r2	klhl40.ko_4mo_r3	klhl40.ko_4mo_r4	wt_1.5mo_r1	wt_1.5mo_r2	wt_1.5mo_r3	wt_1.5mo_r4	wt_4mo_r1	wt_4mo_r2	wt_4mo_r3	wt_4mo_r4	tr1M_KO - tr1M_WT.logFC.ub	tr1M_KO - tr1M_WT.P.Value.ub	tr1M_KO - tr1M_WT.adj.P.Val.ub	tr1M_KO - tr1M_WT.Q.Value.ub	tr4M_KO - tr4M_WT.logFC.ub	tr4M_KO - tr4M_WT.P.Value.ub	tr4M_KO - tr4M_WT.adj.P.Val.ub	tr4M_KO - tr4M_WT.Q.Value.ub	tr4M_KO - tr1M_KO.logFC.ub	tr4M_KO - tr1M_KO.P.Value.ub	tr4M_KO - tr1M_KO.adj.P.Val.ub	tr4M_KO - tr1M_KO.Q.Value.ub	tr4M_WT - tr1M_WT.logFC.ub	tr4M_WT - tr1M_WT.P.Value.ub	tr4M_WT - tr1M_WT.adj.P.Val.ub	tr4M_WT - tr1M_WT.Q.Value.ub	accession_number	numColumnsVMsiteObserved	numSpectraVMsiteObserved	bestScore	bestDeltaForwardReverseScore	Best_scoreVML	Best_numPossibleVMsites_K	Best_numActualVMSites_k	Best_numLocalizedVMsites_k	Best_numAmbiguousVMsites_k	best_delta_parent_mass	best_delta_ppm	variableSites	StartAA	previous_aa	sequence	next_aa	sequenceVML
[truncated: 4,225 more rows]
[truncated: 60 more columns]
