# Supplementary material for: Dynamic regulation of inter-organelle communication by ubiquitylation controls skeletal muscle development and disease onset
Source: eLife. 2023 Jul 11;12:e81966. doi: 10.7554/eLife.81966 (PMC10356137; doi:10.7554/eLife.81966)
Supplement: Supplementary file 3. [file elife-81966-supp3.xlsx]

## Sheet: Table S3
gene_id	WT1	WT2	WT3	WT4	KO1	KO2	KO3	KO4	gene_name	gene_chr	gene_start	gene_end	gene_strand	gene_length	gene_biotype	gene_description	tf_family
ENSDARG00000075445	14.9703	19.3255	18.0169	14.6446	1.09768	0.394483	0.81171	0.311433	psmb5	2	38373272	38392575	+	1308	protein_coding	proteasome subunit beta 5 [Source:ZFIN;Acc:ZDB-GENE-990415-215]	Proteasome
ENSDARG00000088643	0.116917	0.0535646	0.0619625	0.10873	18.6979	15.347	90.293	8.21967	CU855711.1	12	46512881	46540171	+	1272	protein_coding	-	-
ENSDARG00000100858	16.9735	9.41163	11.4084	10.7208	0.366933	0.0631868	0.688324	0	zgc:171695	7	2980248	3011514	-	1361	protein_coding	zgc:171695 [Source:ZFIN;Acc:ZDB-GENE-071004-23]	-
ENSDARG00000094836	1.94498	1.90468	3.28562	3.52712	20.451	34.9641	15.8968	32.2314	si:ch211-195b15.8	3	32403758	32407192	+	2039	protein_coding	si:ch211-195b15.8 [Source:ZFIN;Acc:ZDB-GENE-131127-627]	DSPc
ENSDARG00000093272	0.614175	0.723549	0.557991	0.367179	9.72274	10.8067	15.3648	7.45014	igic1s1	24	38194136	38197040	-	565	protein_coding	immunoglobulin light iota constant 1, s1 [Source:ZFIN;Acc:ZDB-GENE-051013-12]	C1-set
ENSDARG00000002204	205.665	259.198	453.912	290.213	1453.31	3602.31	2303.48	5245.96	hspb11	21	20383837	20384878	+	1042	protein_coding	heat shock protein, alpha-crystallin-related, b11 [Source:ZFIN;Acc:ZDB-GENE-030131-5148]	-
ENSDARG00000078674	3.34616	3.91772	7.98014	2.42032	26.7645	74.6026	47.6211	143.932	hspb9	3	33300522	33301321	+	800	protein_coding	heat shock protein, alpha-crystallin-related, 9 [Source:ZFIN;Acc:ZDB-GENE-080214-6]	-
ENSDARG00000088411	1.13368	1.46963	2.13017	1.88694	7.70572	12.5152	11.702	28.018	notum2	6	10943188	10964083	-	3848	protein_coding	notum pectinacetylesterase 2 [Source:ZFIN;Acc:ZDB-GENE-120215-77]	-
ENSDARG00000054373	0.393122	0.918542	0.187509	0.438712	26.5836	15.7537	23.7731	1.93824	B3GNT3 (1 of many)	8	13572531	13574764	-	1261	protein_coding	si:ch211-126g16.10 [Source:ZFIN;Acc:ZDB-GENE-081104-528]	Galactosyl_T
ENSDARG00000109271	0.0276171	0	0	0	2.64304	5.74912	7.86328	1.43728	BX005305.1	12	46425800	46447830	+	1795	protein_coding	-	-
ENSDARG00000054300	4.99799	4.17252	4.76782	3.20196	0.559442	0.064225	0.139927	0.101408	dhrs1	2	38261748	38269675	+	1339	protein_coding	dehydrogenase/reductase (SDR family) member 1 [Source:ZFIN;Acc:ZDB-GENE-030616-591]	adh_short
ENSDARG00000091609	2.60909	3.36189	2.07411	1.13737	45.3809	104.102	32.665	13.3998	spink4	1	12135129	12138612	+	304	protein_coding	serine peptidase inhibitor, Kazal type 4 [Source:ZFIN;Acc:ZDB-GENE-130821-1]	-
ENSDARG00000029995	59.845	33.3067	28.7937	29.4822	219.902	210.962	126.976	256.213	tnni2b.2	7	39385540	39394430	+	2688	protein_coding	troponin I type 2b (skeletal, fast), tandem duplicate 2 [Source:ZFIN;Acc:ZDB-GENE-040801-9]	-
ENSDARG00000092726	12.7155	6.78287	9.4014	10.1092	51.899	104.739	35.0078	58.9415	si:dkey-184p9.7	21	11503212	11505881	+	1115	protein_coding	si:dkey-184p9.7 [Source:ZFIN;Acc:ZDB-GENE-091204-97]	-
ENSDARG00000111637	0.729593	0.468688	0.567386	0.508877	0.0299589	0.0275147	0.0199821	0	FQ377660.1	2	38731696	38741768	+	6251	protein_coding	-	zf-B_box
ENSDARG00000018846	3.85258	6.31902	4.50088	1.81119	0.589668	0.332321	0.348605	0.466414	dgat2	10	32501961	32524771	-	2329	protein_coding	diacylglycerol O-acyltransferase 2 [Source:ZFIN;Acc:ZDB-GENE-050913-15]	-
ENSDARG00000113257	79.7999	54.0088	64.3986	70.2764	206.305	315.848	272.792	550.867	FO704821.1	16	43353106	43356018	-	492	protein_coding	-	-
ENSDARG00000069839	0.156876	0.598929	0.720542	0.29178	7.41893	4.11239	23.519	3.72405	CU571382.1	3	58654598	58680069	+	2844	lincRNA	-	-
ENSDARG00000097208	25.9428	17.0071	30.8891	38.125	114.898	333.824	124.859	432.378	C11orf96	25	30298377	30299662	+	1286	protein_coding	chromosome 11 open reading frame 96 [Source:HGNC Symbol;Acc:HGNC:38675]	-
ENSDARG00000097108	0.198363	0.0743553	0.258038	0.0754659	1.04457	2.34623	1.63575	1.63001	BX649442.2	9	29682197	29707257	-	2749	lincRNA	-	-
ENSDARG00000102776	4.83636	4.59442	3.73162	2.97641	53.3787	30.4754	46.8628	10.3251	cxcl19	7	7806682	7810348	-	697	protein_coding	chemokine (C-X-C motif) ligand 19 [Source:ZFIN;Acc:ZDB-GENE-140708-2]	-
ENSDARG00000002259	0.710295	0.650834	0.0941089	0.660556	21.1311	16.1213	16.2194	1.37811	ca15c	12	4338298	4346085	-	1675	protein_coding	carbonic anhydrase XV c [Source:ZFIN;Acc:ZDB-GENE-061013-737]	-
ENSDARG00000058799	2.44386	2.94551	4.84195	5.61188	25.7557	19.6323	16.9812	53.8608	mybpha	23	6077503	6126003	+	2637	protein_coding	myosin binding protein Ha [Source:ZFIN;Acc:ZDB-GENE-040426-1531]	I-set
ENSDARG00000014624	2.12269	2.59728	2.96333	2.7083	0.488964	0.0449072	0.32613	0.283624	si:dkeyp-94g1.1	2	48545804	48561471	-	1915	protein_coding	si:dkeyp-94g1.1 [Source:ZFIN;Acc:ZDB-GENE-030131-7910]	Lectin_C
ENSDARG00000018966	3.69646	4.76546	4.23694	7.55475	0.433002	0.745641	0.541508	1.3343	cyb5r1	11	24786378	24799675	+	1730	protein_coding	cytochrome b5 reductase 1 [Source:ZFIN;Acc:ZDB-GENE-030131-8497]	FAD_binding_6
ENSDARG00000075942	1.91876	1.53509	1.82129	3.83512	0.144251	0.149042	0.252558	0.235329	FRMD5	18	26460444	26675699	-	1731	protein_coding	si:ch211-69m14.1 [Source:ZFIN;Acc:ZDB-GENE-050419-226]	Band_41
ENSDARG00000114194	0	0	0	0	1.91546	1.48854	9.23787	0.534165	BX005305.3	12	46386983	46391264	+	1271	protein_coding	Danio rerio legumain (LOC100005356), mRNA. [Source:RefSeq mRNA;Acc:NM_001328007]	-
ENSDARG00000104441	16.9615	6.11791	9.60992	17.7128	60.8313	57.3857	54.0716	84.4484	hspb7	23	24258323	24263474	-	1058	protein_coding	heat shock protein family, member 7 (cardiovascular) [Source:ZFIN;Acc:ZDB-GENE-041010-136]	-
ENSDARG00000030905	0.486214	0.871653	1.51247	0.973141	4.07289	10.8551	4.34115	11.7545	cited2	20	36915143	36917670	-	2345	protein_coding	Cbp/p300-interacting transactivator, with Glu/Asp-rich carboxy-terminal domain, 2 [Source:ZFIN;Acc:ZDB-GENE-041010-141]	-
ENSDARG00000018145	69.214	128.726	106.657	77.8652	24.2787	22.5484	23.9263	36.5917	mid1ip1l	14	41466368	41469036	-	1373	protein_coding	MID1 interacting protein 1, like [Source:ZFIN;Acc:ZDB-GENE-030131-1697]	-
ENSDARG00000008049	15.4162	9.76722	10.5696	13.1908	33.3411	49.1129	33.0681	58.3953	si:dkey-42i9.4	22	10540446	10541712	-	865	protein_coding	si:dkey-42i9.4 [Source:ZFIN;Acc:ZDB-GENE-030131-8398]	-
ENSDARG00000111373	0	0	0	0	1.86635	0.811933	4.86462	0.640998	BX005305.2	12	46462090	46466474	+	1271	protein_coding	-	-
ENSDARG00000076950	6.2266	4.76232	4.47262	9.52335	1.81441	1.3093	0.713142	0.892703	kel	16	17263027	17300030	-	2890	protein_coding	Kell blood group, metallo-endopeptidase [Source:ZFIN;Acc:ZDB-GENE-110411-118]	-
ENSDARG00000095112	1.22402	1.68233	0.97304	0.640296	18.6888	9.28983	41.6359	5.44815	BX640512.2	5	38786068	38786490	+	324	processed_transcript	-	-
ENSDARG00000106212	6.82304	11.2036	14.976	9.68633	2.43311	2.19969	2.0539	3.30779	LO017965.1	3	31257172	31258459	-	821	protein_coding	-	-
ENSDARG00000040643	1.06921	1.33596	0.55635	0.786434	8.6415	4.38417	13.2255	2.87544	ccr10	24	36673686	36680261	-	2550	protein_coding	chemokine (C-C motif) receptor 10 [Source:ZFIN;Acc:ZDB-GENE-040718-424]	7tm_1
ENSDARG00000073704	1.29602	1.52152	1.24492	2.2222	9.92806	12.6467	4.45613	37.4222	si:dkeyp-72g9.4	21	32476709	32487084	-	1836	protein_coding	si:dkeyp-72g9.4 [Source:ZFIN;Acc:ZDB-GENE-031204-23]	-
ENSDARG00000045155	0	0	0	0	7.30077	1.48137	0.226487	2.70831	phf5a	12	19138452	19143692	+	1103	protein_coding	PHD finger protein 5A [Source:ZFIN;Acc:ZDB-GENE-021219-3]	-
ENSDARG00000093186	8.67229	13.5946	4.76997	2.97533	120.599	59.3239	168.906	18.1046	si:dkey-30j10.5	3	16780455	16784281	-	2115	protein_coding	si:dkey-30j10.5 [Source:ZFIN;Acc:ZDB-GENE-091118-81]	-
ENSDARG00000056642	4.31934	4.3888	3.10505	3.38054	0.996277	0.902631	1.26614	1.71805	hdac9b	16	19840146	20006270	-	6955	protein_coding	histone deacetylase 9b [Source:ZFIN;Acc:ZDB-GENE-040109-7]	-
ENSDARG00000059337	8.17014	11.8583	23.0906	11.6787	46.7463	138.301	47.3619	186.663	tgif1	24	9287409	9300160	-	3683	protein_coding	TGFB-induced factor homeobox 1 [Source:ZFIN;Acc:ZDB-GENE-030131-475]	Coprinus_mating
ENSDARG00000037455	0.0280706	0.0385811	0.0892596	0.0130525	0.0117826	3.14901	4.07872	2.22976	ugt8	1	20556067	20593778	-	5298	protein_coding	UDP glycosyltransferase 8 [Source:ZFIN;Acc:ZDB-GENE-060616-129]	UDPGT
ENSDARG00000074069	0.368766	0.289625	0.167516	0.146975	10.8795	2.65029	8.62806	0.721492	zgc:171452	1	56463494	56468601	+	941	protein_coding	zgc:171452 [Source:ZFIN;Acc:ZDB-GENE-071004-84]	-
ENSDARG00000088641	15.3213	13.6616	12.1798	14.0424	41.5365	26.3593	51.5265	39.5389	grn2	19	40196462	40199098	-	783	protein_coding	granulin 2 [Source:ZFIN;Acc:ZDB-GENE-050522-264]	-
ENSDARG00000043912	0.538145	0.522101	0.100659	0.0441583	8.45081	3.40474	5.54348	1.64745	mei4	20	812012	823276	+	1566	protein_coding	meiosis-specific, MEI4 homolog (S. cerevisiae) [Source:ZFIN;Acc:ZDB-GENE-040724-211]	-
ENSDARG00000116187	0	0.0536068	0.186034	0	2.21015	1.55621	5.50341	0.961497	BX005305.5	12	46483618	46488071	+	1271	protein_coding	-	-
ENSDARG00000071355	0.757502	1.44157	1.69074	1.07701	10.8046	5.00366	8.25867	3.15222	si:ch211-197g15.7	22	17475034	17482810	-	3403	protein_coding	si:ch211-197g15.7 [Source:ZFIN;Acc:ZDB-GENE-030131-4763]	-
ENSDARG00000104398	1.17648	0.661497	0.425115	0.29839	8.01349	6.49386	15.5629	1.90421	si:ch73-343g19.4	16	45149355	45152169	-	927	protein_coding	si:ch73-343g19.4 [Source:ZFIN;Acc:ZDB-GENE-100922-108]	-
ENSDARG00000027088	1935.84	1687	1480.96	1188.02	597.43	525.511	747.444	458.818	ptgdsb.1	24	17027310	17029374	-	1029	protein_coding	prostaglandin D2 synthase b, tandem duplicate 1 [Source:ZFIN;Acc:ZDB-GENE-030131-8436]	-
ENSDARG00000038786	2.57699	3.13634	3.5655	5.68034	1.06518	0.853147	0.793066	1.07766	smarcd3a	2	32515846	32558795	-	2520	protein_coding	SWI/SNF related, matrix associated, actin dependent regulator of chromatin, subfamily d, member 3a [Source:ZFIN;Acc:ZDB-GENE-070912-491]	-
ENSDARG00000053026	0.0173604	0.119303	0.0828047	0.0363257	0.448153	0.466803	0.743629	1.83075	kif19	12	38770654	38805710	+	5711	protein_coding	kinesin family member 19 [Source:ZFIN;Acc:ZDB-GENE-080215-2]	Kinesin
ENSDARG00000068865	1.45802	1.09306	1.08882	0.616328	14.9941	4.52214	33.704	2.78347	si:dkey-61p9.7	4	77657660	77669219	+	2244	protein_coding	si:dkey-61p9.7 [Source:ZFIN;Acc:ZDB-GENE-041210-241]	-
ENSDARG00000054292	1.49834	2.54134	2.68634	1.60095	0.0401443	0.0553037	0.36147	0	si:ch211-14a17.11	2	38225427	38230008	+	1555	protein_coding	si:ch211-14a17.11 [Source:ZFIN;Acc:ZDB-GENE-030616-582]	-
ENSDARG00000038424	0.795949	1.42445	0.896388	0.647685	3.58113	5.32179	2.26668	4.4285	si:dkey-8k3.2	16	16665203	16701718	-	5979	protein_coding	si:dkey-8k3.2 [Source:ZFIN;Acc:ZDB-GENE-100922-98]	A2M_comp
ENSDARG00000031243	0.427044	0.146736	0.509222	0.496425	2.59915	8.02559	1.56919	3.80158	snai3	7	55112922	55120300	+	1393	protein_coding	snail family zinc finger 3 [Source:ZFIN;Acc:ZDB-GENE-061013-757]	zf-C2H2
ENSDARG00000089791	0.537978	0.414793	0.625857	0.549116	1.88364	4.07451	1.47125	6.57719	slc25a32a	19	12937066	12967986	-	3778	protein_coding	solute carrier family 25 (mitochondrial folate carrier), member 32a [Source:ZFIN;Acc:ZDB-GENE-040426-758]	Mito_carr
ENSDARG00000071461	0.161738	0.88919	1.0286	0.789664	6.21189	3.36694	39.3266	7.08827	CU896602.1	24	38211103	38212927	-	613	processed_transcript	-	-
ENSDARG00000098843	0.0767379	0.0632826	0.0732039	0.149865	1.12093	0.87861	1.17947	0.29427	FQ311879.1	3	5490104	5510788	+	3230	protein_coding	-	-
ENSDARG00000020623	12.2188	13.4549	13.0787	9.79737	23.9278	23.3665	27.6664	27.6708	baxa	3	37776489	37785873	-	2061	protein_coding	BCL2 associated X, apoptosis regulator a [Source:ZFIN;Acc:ZDB-GENE-000511-6]	-
ENSDARG00000105464	0.222598	0.198865	0.088478	0.0465774	1.44358	1.39017	3.51952	0.396318	si:ch211-285c6.6	7	3461500	3470451	-	4454	protein_coding	si:ch211-285c6.6 [Source:ZFIN;Acc:ZDB-GENE-160113-80]	-
ENSDARG00000043243	0.804099	1.08307	0.869344	1.17777	5.7311	2.9433	4.9335	2.02631	prkchb	20	20360337	20410127	-	6165	protein_coding	protein kinase C, eta, b [Source:ZFIN;Acc:ZDB-GENE-041001-104]	Pkinase
ENSDARG00000086963	0.247709	0	0.196918	0.043193	1.24771	1.77259	1.17028	1.78106	BX649442.1	9	29690678	29694199	+	1601	lincRNA	-	-
ENSDARG00000094646	5.28516	6.2146	6.18913	8.23934	3.03544	2.97393	2.68791	2.66566	dyrk2	4	13449775	13462784	+	6622	protein_coding	dual-specificity tyrosine-(Y)-phosphorylation regulated kinase 2 [Source:ZFIN;Acc:ZDB-GENE-030131-2804]	Pkinase
ENSDARG00000104684	1.24782	1.24731	1.44286	1.1077	5.9996	5.9037	6.28827	5.28224	trdc	2	36089660	36090680	+	437	IG_C_gene	T-cell receptor delta constant [Source:ZFIN;Acc:ZDB-GENE-170601-8]	-
ENSDARG00000004325	1.89752	1.72781	0.905067	1.45583	4.39062	4.23814	4.66163	6.49688	casp9	23	24973773	24985272	+	2090	protein_coding	caspase 9, apoptosis-related cysteine peptidase [Source:ZFIN;Acc:ZDB-GENE-030825-5]	Peptidase_C14
ENSDARG00000097639	5.53385	6.14848	3.84598	4.02154	20.1961	16.1532	41.8725	12.0718	si:ch73-265h17.4	25	4960509	4977792	+	1496	protein_coding	si:ch73-265h17.4 [Source:ZFIN;Acc:ZDB-GENE-131121-594]	-
ENSDARG00000102594	1.41636	1.49246	0.225189	0.395154	12.1282	7.94451	12.1339	2.84501	zgc:194627	22	5433093	5441893	-	1050	protein_coding	zgc:194627 [Source:ZFIN;Acc:ZDB-GENE-081022-132]	V-set
ENSDARG00000003902	0.307758	0.553143	0.301113	0.330239	4.94864	2.71051	5.30888	0.583602	ctsl.1	17	27456804	27461321	+	2094	protein_coding	cathepsin L.1 [Source:ZFIN;Acc:ZDB-GENE-040718-61]	Peptidase_C1
ENSDARG00000076358	0	0	0	0	0.724716	0.544574	1.48307	0.143308	zmp:0000001161	22	5851122	5857210	+	1895	protein_coding	zmp:0000001161 [Source:ZFIN;Acc:ZDB-GENE-140106-121]	V-set
ENSDARG00000016868	3.51635	4.18858	2.78292	4.51275	1.53503	1.49113	0.984456	1.1558	rhobtb2a	5	43427841	43502675	+	3172	protein_coding	Rho-related BTB domain containing 2a [Source:ZFIN;Acc:ZDB-GENE-060315-11]	Ras
ENSDARG00000019763	0.0251128	0.0690316	0.0399272	0.0700628	0.822206	0.392085	1.10734	1.16937	acp5a	6	8355122	8362516	-	1974	protein_coding	acid phosphatase 5a, tartrate resistant [Source:ZFIN;Acc:ZDB-GENE-040426-2864]	Metallophos
ENSDARG00000056324	1.94232	2.70943	1.0601	1.69847	19.713	10.9634	18.444	2.85863	zgc:123295	3	21189766	21198744	+	1710	protein_coding	zgc:123295 [Source:ZFIN;Acc:ZDB-GENE-051127-11]	Trypsin
ENSDARG00000089547	0.418587	0.657507	0.285222	1.00099	4.66865	2.07472	18.3068	4.42242	BX571825.5	19	23121009	23124591	+	829	IG_C_pseudogene	-	C1-set
ENSDARG00000062936	0.590844	0.663385	0.542465	0.859031	0.0733542	0.115491	0.199198	0.182353	ndnf	23	2050359	2099350	-	5957	protein_coding	neuron-derived neurotrophic factor [Source:ZFIN;Acc:ZDB-GENE-030131-207]	-
ENSDARG00000021806	0.429281	0.4361	0.712195	0.729012	13.8904	4.40347	0.399743	18.9158	zfp36l2	12	25376639	25380028	-	2656	protein_coding	zinc finger protein 36, C3H type-like 2 [Source:ZFIN;Acc:ZDB-GENE-030131-5873]	zf-CCCH
ENSDARG00000019601	1.63165	2.34733	2.31624	2.10726	0.553178	0.544336	0.78498	1.04365	col12a1b	20	49451764	49681850	-	11059	protein_coding	collagen, type XII, alpha 1b [Source:ZFIN;Acc:ZDB-GENE-120215-116]	VWA
ENSDARG00000100741	0.324004	0.602494	0.333325	0.345627	5.30403	1.91766	3.72178	0.835277	cdc20	2	19217586	19234469	-	2601	protein_coding	cell division cycle 20 homolog [Source:ZFIN;Acc:ZDB-GENE-040426-2044]	WD40
ENSDARG00000113346	0	0.513252	0.742149	0.260459	8.81701	2.10539	23.876	3.06858	zgc:153659	24	39688072	39697475	+	531	protein_coding	zgc:153659 [Source:ZFIN;Acc:ZDB-GENE-060825-311]	C1-set
ENSDARG00000102153	2.07304	1.85821	1.89477	1.92787	0.643161	1.00764	0.656082	0.713213	nrp1a	24	1162325	1356668	-	4950	protein_coding	neuropilin 1a [Source:ZFIN;Acc:ZDB-GENE-030519-2]	CUB
ENSDARG00000095351	6.54084	5.63054	4.65235	3.84178	12.7016	10.9288	18.7795	15.9358	CU914776.1	8	44340504	44344742	-	1440	processed_transcript	-	-
ENSDARG00000039265	1.6066	1.98051	1.76435	2.28735	4.60935	5.22937	11.0385	5.44409	arhgap4a	23	24989387	25015393	+	2993	protein_coding	Rho GTPase activating protein 4a [Source:ZFIN;Acc:ZDB-GENE-040426-1229]	RhoGAP
ENSDARG00000017340	2.26474	4.03502	12.6693	1.63812	0	0.291023	0	0	uts2b	11	40024182	40030139	-	591	protein_coding	urotensin 2, beta [Source:ZFIN;Acc:ZDB-GENE-040630-10]	-
ENSDARG00000017617	3.06313	4.46782	5.41675	3.35731	10.9026	12.417	8.44664	10.1453	alg6	6	32065094	32087111	-	3172	protein_coding	asparagine-linked glycosylation 6 (alpha-1,3,-glucosyltransferase) [Source:ZFIN;Acc:ZDB-GENE-040808-45]	-
ENSDARG00000105643	3.21661	3.7018	2.83846	4.33676	9.03129	9.82521	8.35692	20.1506	adgrg1	7	28648706	28658143	-	3221	protein_coding	adhesion G protein-coupled receptor G1 [Source:ZFIN;Acc:ZDB-GENE-030131-3671]	Pkinase_Tyr
ENSDARG00000104524	0.3233	0.388809	0.749611	0.413408	0	0.0233688	0.0169712	0	CR391991.4	2	48519594	48539673	-	3680	protein_coding	-	Lectin_C
ENSDARG00000011496	0.0628099	0.0755368	0.0624139	0.120474	2.5211	0.599284	0.0494567	2.88172	ppm1bb	12	25432626	25487244	+	6314	protein_coding	protein phosphatase, Mg2+/Mn2+ dependent, 1Bb [Source:ZFIN;Acc:ZDB-GENE-041114-185]	PP2C
ENSDARG00000070362	1.47428	5.06574	1.17199	1.38818	37.7331	16.7519	35.7079	3.33152	cx30.9	19	37118547	37119891	+	1345	protein_coding	connexin 30.9 [Source:ZFIN;Acc:ZDB-GENE-050616-2]	Connexin
ENSDARG00000003865	8.65143	9.09645	8.94076	7.90481	3.81301	3.4519	2.34338	1.42183	pard6b	23	19066696	19103855	-	1146	protein_coding	par-6 partitioning defective 6 homolog beta (C. elegans) [Source:ZFIN;Acc:ZDB-GENE-090312-133]	PDZ
ENSDARG00000020876	0.106408	0.073125	0.0845895	0.0371086	0.385232	1.01526	0.301629	1.31158	pdk2a	12	28559408	28570989	-	3727	protein_coding	pyruvate dehydrogenase kinase, isozyme 2a [Source:ZFIN;Acc:ZDB-GENE-120910-1]	HATPase_c
ENSDARG00000054290	2.44559	2.52551	3.17367	3.03347	0.857295	0.573315	0.990935	1.44837	acin1a	2	38197820	38225472	-	7500	protein_coding	apoptotic chromatin condensation inducer 1a [Source:ZFIN;Acc:ZDB-GENE-030616-583]	SAP
ENSDARG00000087983	12.4929	12.798	14.3462	13.2675	6.05818	3.6345	2.9607	1.45744	igsf5a	10	39028331	39091894	-	4472	protein_coding	immunoglobulin superfamily, member 5a [Source:ZFIN;Acc:ZDB-GENE-091204-182]	ig
ENSDARG00000077029	0.318427	0.612718	0.405017	0.213213	3.36822	1.5909	2.2305	0.872204	bub1	20	2610550	2641246	-	3892	protein_coding	BUB1 mitotic checkpoint serine/threonine kinase [Source:ZFIN;Acc:ZDB-GENE-081104-75]	Pkinase
ENSDARG00000071549	2.45477	1.8041	1.7075	1.97373	0.686926	0.709743	0.794634	0.700403	ecm2	22	10490937	10502780	-	2908	protein_coding	extracellular matrix protein 2, female organ and adipocyte specific [Source:ZFIN;Acc:ZDB-GENE-050208-651]	VWC
ENSDARG00000079752	0.59312	1.26471	0.934197	0.695927	0.27921	0.182707	0.195539	0.334034	col6a4a	16	36650984	36719705	+	8943	protein_coding	collagen, type VI, alpha 4a [Source:ZFIN;Acc:ZDB-GENE-041111-303]	VWA
ENSDARG00000100155	1.01862	0.855567	0.539837	1.0657	0.0356304	0.0490852	0	0	si:ch211-217i17.1	7	2797795	2808399	+	1752	protein_coding	si:ch211-217i17.1 [Source:ZFIN;Acc:ZDB-GENE-131122-15]	Pkinase
ENSDARG00000054937	1.75091	1.95529	1.44989	1.57742	3.49099	5.44206	4.64153	4.79593	badb	7	25129520	25133853	-	1359	protein_coding	BCL2 associated agonist of cell death b [Source:ZFIN;Acc:ZDB-GENE-000616-1]	-
ENSDARG00000030722	20.1376	21.2349	42.5024	35.6644	70.6237	133.855	84.9391	293.22	xirp1	2	23749614	23768832	-	8291	protein_coding	xin actin binding repeat containing 1 [Source:ZFIN;Acc:ZDB-GENE-050221-2]	-
ENSDARG00000094281	6.16228	2.64033	3.17328	4.8027	1.35091	0.34624	1.06866	0.820039	si:ch73-196i15.3	8	20880848	20892051	+	1987	protein_coding	si:ch73-196i15.3 [Source:ZFIN;Acc:ZDB-GENE-091116-4]	-
ENSDARG00000068503	0.460903	0.21116	0.814217	0.535785	0	0	0	0	gbgt1l4	5	23788592	23805387	-	1936	protein_coding	globoside alpha-1,3-N-acetylgalactosaminyltransferase 1, like 4 [Source:ZFIN;Acc:ZDB-GENE-031204-4]	-
ENSDARG00000018146	22.0906	8.8536	11.3549	23.3437	4.93752	5.58739	3.83721	4.50698	gpx1a	11	36048579	36156971	-	1416	protein_coding	glutathione peroxidase 1a [Source:ZFIN;Acc:ZDB-GENE-030410-1]	GSHPx
ENSDARG00000086189	16.3426	19.253	25.4885	18.5636	3.62591	4.59012	4.31393	10.445	mgp	3	1414870	1434135	-	637	protein_coding	matrix Gla protein [Source:ZFIN;Acc:ZDB-GENE-060928-1]	-
ENSDARG00000036371	15.4633	17.9464	31.9568	40.0298	1.35705	5.60852	5.30448	7.68852	acta1a	1	53945934	53953532	+	1978	protein_coding	actin, alpha 1a, skeletal muscle [Source:ZFIN;Acc:ZDB-GENE-050417-267]	Actin
ENSDARG00000069113	1.34222	1.68081	1.09072	1.0818	0.300478	0.103486	0.263043	0.245099	dbn1	21	36801620	36972127	-	1662	protein_coding	drebrin 1 [Source:ZFIN;Acc:ZDB-GENE-091204-284]	Cofilin_ADF
ENSDARG00000097271	0	0.0553487	0	0	2.73836	1.39719	0.963952	0.110304	CU571382.2	3	58669650	58670942	-	1231	lincRNA	-	-
ENSDARG00000095304	7.76036	7.99956	5.53096	12.5985	2.19033	2.66928	2.94991	2.19894	si:ch211-207c6.2	5	42271810	42272550	-	741	protein_coding	si:ch211-207c6.2 [Source:ZFIN;Acc:ZDB-GENE-060526-90]	-
ENSDARG00000061852	1.03069	1.82788	1.74442	1.57691	0.16747	0.461421	0.167549	0.273209	olfml3a	23	24789205	24797586	+	1491	protein_coding	olfactomedin-like 3a [Source:ZFIN;Acc:ZDB-GENE-060825-31]	-
ENSDARG00000078654	0.677505	1.04166	0.346886	0.496574	4.54048	2.05182	4.32562	1.44686	tpx2	23	32028574	32039790	+	4317	protein_coding	TPX2, microtubule-associated, homolog (Xenopus laevis) [Source:ZFIN;Acc:ZDB-GENE-030131-9652]	-
ENSDARG00000009131	9.01321	5.26702	2.24214	9.53673	1.58281	1.17003	1.6608	1.09165	slc10a4	20	23431485	23440955	-	1617	protein_coding	solute carrier family 10, member 4 [Source:ZFIN;Acc:ZDB-GENE-041014-249]	-
ENSDARG00000090890	4.28756	3.11693	2.08449	3.90494	12.2261	7.56087	16.9193	8.34703	cmklr1	5	20570573	20590795	+	1399	protein_coding	chemokine-like receptor 1 [Source:ZFIN;Acc:ZDB-GENE-060526-126]	7tm_1
ENSDARG00000101009	5.64131	5.46872	4.24628	5.13222	14.6538	7.89529	15.9997	14.7057	cited4b	16	35535171	35537491	+	1819	protein_coding	Cbp/p300-interacting transactivator, with Glu/Asp-rich carboxy-terminal domain, 4b [Source:ZFIN;Acc:ZDB-GENE-030425-5]	-
ENSDARG00000097929	0.24628	0	0.223751	0.196315	2.43672	1.9531	3.76762	0.385478	BX005392.3	24	17322644	17325645	+	1409	processed_transcript	-	-
ENSDARG00000034705	0.250977	0.293847	0.369474	0.64834	0.971541	1.66093	1.75663	7.28191	pvalb7	22	29165330	29242347	-	5333	protein_coding	parvalbumin 7 [Source:ZFIN;Acc:ZDB-GENE-040718-285]	-
ENSDARG00000033971	5.37817	5.35646	5.4527	3.4431	1.34141	1.89302	2.29129	1.56565	prrx1a	2	23165250	23172708	-	1908	protein_coding	paired related homeobox 1a [Source:ZFIN;Acc:ZDB-GENE-020905-5]	Homeobox
ENSDARG00000077852	0.854701	1.40064	1.115	0.825421	0.234574	0.133064	0.179465	0.480229	samd11	23	23020709	23123901	+	4524	protein_coding	sterile alpha motif domain containing 11 [Source:ZFIN;Acc:ZDB-GENE-060428-2]	SAND
ENSDARG00000104303	0.0484581	0.199807	0.154088	0.135194	2.68492	0.756574	3.84614	0.66366	FP085399.4	16	45186673	45193152	-	1023	processed_transcript	-	-
ENSDARG00000043137	0.606023	0.645526	0.457674	0.338151	2.88083	1.44555	2.48136	1.12047	cdca8	19	47771659	47782916	-	3272	protein_coding	cell division cycle associated 8 [Source:ZFIN;Acc:ZDB-GENE-041114-171]	-
ENSDARG00000100872	22.3657	33.7647	62.7858	45.2083	113.513	251.329	85.6914	421.492	otud1	24	9298198	9299478	+	1239	protein_coding	OTU deubiquitinase 1 [Source:ZFIN;Acc:ZDB-GENE-170421-2]	OTU
ENSDARG00000078847	5.27895	5.44167	3.6064	5.69554	1.86962	1.28781	1.92246	0.677794	si:dkey-238o13.4	18	14671789	14677936	-	1202	protein_coding	si:dkey-238o13.4 [Source:ZFIN;Acc:ZDB-GENE-070705-403]	adh_short
ENSDARG00000041998	1.72698	5.09742	2.88078	3.39638	0.748665	1.03138	0.749019	0.310188	zgc:113337	9	9322424	9348058	-	1751	protein_coding	zgc:113337 [Source:ZFIN;Acc:ZDB-GENE-050306-20]	V-set
ENSDARG00000043009	28.2607	35.1948	43.0639	34.5336	86.0217	90.0037	59.723	136.34	fam43a	11	34235356	34237802	+	2447	protein_coding	family with sequence similarity 43, member A [Source:ZFIN;Acc:ZDB-GENE-030131-6098]	-
ENSDARG00000007823	6.79078	15.2615	20.1637	17.6144	35.5456	111.755	34.7994	113.414	atf3	20	37794633	37800737	+	2701	protein_coding	activating transcription factor 3 [Source:ZFIN;Acc:ZDB-GENE-040426-728]	bZIP_1
ENSDARG00000025903	0.991003	1.48589	0.429711	0.471276	4.62298	2.7741	8.51257	2.65277	lgals9l1	15	31032255	31043183	-	2201	protein_coding	lectin, galactoside-binding, soluble, 9 (galectin 9)-like 1 [Source:ZFIN;Acc:ZDB-GENE-030131-9543]	-
ENSDARG00000087611	2.39088	2.20239	2.42636	1.845	5.28478	4.633	7.81876	4.66782	FP085398.1	19	26828502	26844582	+	1949	protein_coding	-	-
ENSDARG00000013719	0.236483	0.385972	0.234992	0.247413	1.13533	0.641005	1.41518	1.01211	gtse1	25	19594160	19608460	-	3354	protein_coding	G-2 and S-phase expressed 1 [Source:ZFIN;Acc:ZDB-GENE-050522-493]	-
ENSDARG00000105423	0.228051	0.274261	0	0.119296	2.51277	1.48356	4.56104	0.312328	cd27	16	17089114	17101441	+	1739	protein_coding	CD27 molecule [Source:ZFIN;Acc:ZDB-GENE-160113-60]	-
ENSDARG00000055381	8.65705	7.99025	13.2114	8.15367	2.82481	4.98773	2.90576	3.20206	bambia	12	23424108	23430356	+	1569	protein_coding	BMP and activin membrane-bound inhibitor (Xenopus laevis) homolog a [Source:ZFIN;Acc:ZDB-GENE-010416-1]	-
ENSDARG00000104359	36.2932	50.2954	36.1122	25.1881	388.355	173.193	291.338	35.6332	anxa1c	5	65009764	65021736	-	1650	protein_coding	annexin A1c [Source:ZFIN;Acc:ZDB-GENE-030131-5274]	-
ENSDARG00000037142	1.73454	2.66041	3.47719	1.61308	4.77996	8.93988	7.88591	17.8338	zgc:153146	14	29775402	29795189	+	1972	protein_coding	zgc:153146 [Source:ZFIN;Acc:ZDB-GENE-060825-339]	-
ENSDARG00000010478	109.682	251.713	341.884	282.132	49.6902	69.5277	57.3534	106.052	hsp90aa1.1	20	53982317	54012043	-	2804	protein_coding	heat shock protein 90, alpha (cytosolic), class A member 1, tandem duplicate 1 [Source:ZFIN;Acc:ZDB-GENE-990415-94]	-
ENSDARG00000009657	6.39965	5.07454	5.47879	6.04307	9.7945	11.657	10.5434	12.0683	fgfr1op2	4	1722899	1730920	+	2014	protein_coding	FGFR1 oncogene partner 2 [Source:ZFIN;Acc:ZDB-GENE-030131-7451]	-
ENSDARG00000087832	0.611729	0.591659	0.270165	0.316051	3.06701	1.63112	3.96759	0.775736	bcl3	16	25701985	25741225	-	4376	protein_coding	B cell CLL/lymphoma 3 [Source:ZFIN;Acc:ZDB-GENE-061013-1]	-
ENSDARG00000044125	9.57941	17.5984	16.4871	12.1281	65.251	34.3331	74.8411	24.5071	txn	7	24357231	24364826	-	1568	protein_coding	thioredoxin [Source:ZFIN;Acc:ZDB-GENE-040718-162]	-
ENSDARG00000099203	4.31067	6.37841	6.02004	7.53006	1.7116	2.99795	2.56861	2.02108	atp1b2a	23	44732863	44763861	+	2553	protein_coding	ATPase Na+/K+ transporting subunit beta 2a [Source:ZFIN;Acc:ZDB-GENE-001127-2]	-
ENSDARG00000056128	1.05104	1.02049	1.27247	0.955026	1.7728	2.99426	3.14638	4.85983	fastkd1	9	48232571	48267646	+	5141	protein_coding	FAST kinase domains 1 [Source:ZFIN;Acc:ZDB-GENE-040426-1833]	-
ENSDARG00000098913	0.1263	0.17359	0.0502014	0	2.30612	1.25983	2.1481	0.172974	faslg	20	15600167	15605010	+	1570	protein_coding	Fas ligand (TNF superfamily, member 6) [Source:ZFIN;Acc:ZDB-GENE-070410-16]	-
ENSDARG00000079843	0	0.160947	0.12412	0.163351	1.13052	0.744858	3.88493	0.855337	si:dkey-234i14.9	25	37289088	37317174	+	1270	protein_coding	si:dkey-234i14.9 [Source:ZFIN;Acc:ZDB-GENE-131120-152]	C1-set
ENSDARG00000058731	0.78448	0.915743	0.444228	0.67458	1.86745	1.52867	4.10222	2.44312	slc2a6	8	12854105	12867434	-	4613	protein_coding	solute carrier family 2 (facilitated glucose transporter), member 6 [Source:ZFIN;Acc:ZDB-GENE-081104-301]	Sugar_tr
ENSDARG00000105422	0.984378	0.7399	1.51617	1.33026	0.232421	0.400235	0.0775103	0.21065	si:dkey-1k23.3	5	15841523	15851953	-	3223	protein_coding	si:dkey-1k23.3 [Source:ZFIN;Acc:ZDB-GENE-160113-121]	-
ENSDARG00000103697	2.52878	2.00518	2.13592	2.10297	4.34024	5.04067	3.56114	6.34384	arnt2	7	10701732	10877536	+	8155	protein_coding	aryl-hydrocarbon receptor nuclear translocator 2 [Source:ZFIN;Acc:ZDB-GENE-001207-3]	PAS
ENSDARG00000037618	27.583	25.3032	31.6078	15.2928	68.6226	57.9969	49.045	62.1581	ddit4	12	48340133	48342259	+	1551	protein_coding	DNA-damage-inducible transcript 4 [Source:ZFIN;Acc:ZDB-GENE-031002-35]	-
ENSDARG00000095523	1.74157	2.65014	0.692238	0.260296	0	0	0	0	AL845369.3	5	9173538	9179436	-	797	processed_transcript	-	-
ENSDARG00000044803	2.65618	3.45859	3.86746	3.47125	0.457709	1.06708	0.528375	1.60828	dhrs3b	11	28590733	28614608	-	1773	protein_coding	dehydrogenase/reductase (SDR family) member 3b [Source:ZFIN;Acc:ZDB-GENE-041010-172]	adh_short
ENSDARG00000103650	0.701316	0.776484	1.00146	1.07795	0.294378	0.383011	0.245431	0.409097	si:ch73-329n5.1	12	44119432	44307963	-	7634	protein_coding	si:ch73-329n5.1 [Source:ZFIN;Acc:ZDB-GENE-131121-475]	-
ENSDARG00000012340	2.63082	2.85907	2.72367	2.88044	1.329	1.0879	0.963498	1.59205	ptpn11b	23	23918421	23995856	+	3241	protein_coding	protein tyrosine phosphatase, non-receptor type 11, b [Source:ZFIN;Acc:ZDB-GENE-040426-1158]	Y_phosphatase
ENSDARG00000079553	0.718445	0.831539	0.541073	0.949455	1.61894	3.08304	3.57288	2.79648	cd83	16	38394371	38397359	+	1311	protein_coding	CD83 molecule [Source:ZFIN;Acc:ZDB-GENE-060503-762]	ig
ENSDARG00000070979	0	0.357191	0.206596	0.0906317	5.31794	2.14148	2.6193	0.533885	si:dkey-88e12.3	3	52078798	52089800	+	763	protein_coding	si:dkey-88e12.3 [Source:ZFIN;Acc:ZDB-GENE-131126-37]	-
ENSDARG00000062319	1.08805	1.09423	0.759471	0.703366	0.167089	0.184148	0.167168	0.0726899	si:dkey-103g5.3	15	21862295	21872824	+	1868	protein_coding	si:dkey-103g5.3 [Source:ZFIN;Acc:ZDB-GENE-131127-337]	Zona_pellucida
ENSDARG00000052109	3.07402	2.66844	3.8585	3.92704	6.96774	9.87958	9.25394	24.5512	zgc:114041	5	66132394	66146759	+	1532	protein_coding	zgc:114041 [Source:ZFIN;Acc:ZDB-GENE-050706-122]	MFS_1
ENSDARG00000078683	1.61536	1.0236	1.04232	1.3608	3.20311	2.73859	3.38964	8.46141	RNF14 (1 of many)	15	3766101	3804420	+	9452	protein_coding	zmp:0000000524 [Source:ZFIN;Acc:ZDB-GENE-130530-527]	RWD
ENSDARG00000031427	14.3063	13.1346	25.443	19.0102	7.6191	6.57241	4.82059	8.57044	calm2b	13	8777633	8785610	-	2630	protein_coding	calmodulin 2b, (phosphorylase kinase, delta) [Source:ZFIN;Acc:ZDB-GENE-020415-2]	-
ENSDARG00000075053	0.693324	1.24613	1.56869	1.11595	0.134318	0.27756	0.201573	0.292167	SCCPDH (1 of many)	17	12138715	12156014	+	1859	protein_coding	zgc:174379 [Source:ZFIN;Acc:ZDB-GENE-080212-12]	Saccharop_dh
ENSDARG00000094300	3.50804	1.65988	3.33735	2.76768	7.02456	14.3162	5.43393	23.2346	si:ch211-160e1.5	5	1997765	1999488	-	1724	protein_coding	si:ch211-160e1.5 [Source:ZFIN;Acc:ZDB-GENE-070705-255]	-
ENSDARG00000104576	0.174552	0.383855	0.194265	0.657431	1.25288	4.42099	0.81366	3.01213	PPP1R3G	24	2826210	2829049	-	2840	protein_coding	si:ch211-152c8.5 [Source:ZFIN;Acc:ZDB-GENE-030131-5764]	-
ENSDARG00000033662	6.74085	3.90098	1.64094	1.30475	0.649831	0.559514	0.243802	0	scd	12	48390715	48404672	+	1537	protein_coding	stearoyl-CoA desaturase (delta-9-desaturase) [Source:ZFIN;Acc:ZDB-GENE-031106-3]	-
ENSDARG00000068869	0.390182	0.0536279	0.0310178	0	7.22266	1.48913	19.4907	1.49625	si:ch211-250m6.4	4	77651736	77657505	-	2541	protein_coding	si:ch211-250m6.4 [Source:ZFIN;Acc:ZDB-GENE-061009-21]	HSP70
ENSDARG00000075121	20.3691	20.8618	27.8003	28.8529	45.5886	88.7714	46.0726	120.706	hbegfa	14	7048930	7051940	+	1891	protein_coding	heparin-binding EGF-like growth factor a [Source:ZFIN;Acc:ZDB-GENE-080204-119]	-
ENSDARG00000104654	57.6632	79.5636	21.686	17.905	8.5069	6.58512	3.6678	14.8033	leap2	7	51752239	51757085	-	3082	protein_coding	liver-expressed antimicrobial peptide 2 [Source:ZFIN;Acc:ZDB-GENE-081022-131]	-
ENSDARG00000036820	2.1658	3.47286	3.35647	2.96017	15.978	9.20315	24.0886	3.74517	mgll	8	26292560	26326501	+	4532	protein_coding	monoglyceride lipase [Source:ZFIN;Acc:ZDB-GENE-031006-9]	-
ENSDARG00000076307	7.61383	4.29393	5.69082	8.68729	0.833715	1.3639	0.860175	3.28694	si:zfos-2070c2.3	8	36397818	36412936	-	2396	protein_coding	si:zfos-2070c2.3 [Source:ZFIN;Acc:ZDB-GENE-091204-413]	C1-set
ENSDARG00000074782	0.440195	0.605017	0.269181	0.425115	1.68427	0.851749	3.32746	1.66948	adgrg3	7	64936903	64955976	+	2928	protein_coding	adhesion G protein-coupled receptor G3 [Source:ZFIN;Acc:ZDB-GENE-140106-110]	7tm_2
ENSDARG00000013734	4.20713	4.47318	4.22793	5.86878	8.09668	11.9115	11.0507	17.8292	polr3glb	16	42829735	42843397	+	1249	protein_coding	polymerase (RNA) III (DNA directed) polypeptide G like b [Source:ZFIN;Acc:ZDB-GENE-041010-32]	-
ENSDARG00000011171	0.156501	0.0639485	0.141224	0.0767044	0.0106526	0	0.00532883	0	si:ch211-12m10.1	21	31434251	32008843	+	11720	protein_coding	si:ch211-12m10.1 [Source:ZFIN;Acc:ZDB-GENE-060503-100]	EGF_2
ENSDARG00000062487	1.6673	1.29103	1.49344	3.93095	5.88463	8.59565	5.65073	24.6998	si:dkey-6n6.1	8	14130245	14151051	-	2111	protein_coding	si:dkey-6n6.1 [Source:ZFIN;Acc:ZDB-GENE-060503-80]	-
ENSDARG00000069282	0.455631	0.37574	0.331161	0.726386	1.77044	1.19692	1.21365	3.60143	bbc3	15	23745217	23761580	-	3808	protein_coding	BCL2 binding component 3 [Source:ZFIN;Acc:ZDB-GENE-070119-4]	-
ENSDARG00000070214	2.20743	2.12378	1.98043	4.09105	0.416957	0.738526	0.774715	1.16609	slc41a1	11	37948839	37997419	-	3144	protein_coding	solute carrier family 41 (magnesium transporter), member 1 [Source:ZFIN;Acc:ZDB-GENE-030131-4700]	-
ENSDARG00000097790	0.452423	1.73223	4.67554	5.00383	0.244163	0	0.447844	0.26555	si:dkey-234i14.6	25	37268900	37277392	+	1534	protein_coding	si:dkey-234i14.6 [Source:ZFIN;Acc:ZDB-GENE-131121-173]	-
ENSDARG00000053104	16.414	13.536	12.8044	13.9688	9.04098	7.12888	6.90296	7.05123	fam102ba	2	45665493	45691128	-	2099	protein_coding	family with sequence similarity 102, member B, a [Source:ZFIN;Acc:ZDB-GENE-060616-312]	-
ENSDARG00000095962	4.38618	4.89563	1.87212	15.358	1.48277	0.817076	1.14969	1.12885	fhdc5	23	44901398	44916800	-	1684	protein_coding	FH2 domain containing 5 [Source:ZFIN;Acc:ZDB-GENE-110411-151]	FH2
ENSDARG00000002013	8.91314	5.39315	4.94013	7.95049	3.06309	2.89532	2.63953	3.11254	grb10a	19	23136170	23249822	-	2792	protein_coding	growth factor receptor-bound protein 10a [Source:ZFIN;Acc:ZDB-GENE-040822-32]	SH2
ENSDARG00000054337	0.254354	0.216988	0.139448	0.562808	0.0441786	0.0304307	0.0110499	0.0240242	ap1g2	2	38287358	38312757	-	5652	protein_coding	adaptor-related protein complex 1, gamma 2 subunit [Source:ZFIN;Acc:ZDB-GENE-030616-587]	-
ENSDARG00000009040	30.9409	42.6186	61.7055	57.5172	25.8337	17.5028	16.5668	18.424	si:ch73-141c7.1	3	18023975	18030938	-	1474	protein_coding	si:ch73-141c7.1 [Source:ZFIN;Acc:ZDB-GENE-040426-1760]	-
ENSDARG00000067847	0.2438	0.223391	0.387621	0.28341	0.869848	1.12783	2.71316	1.89208	il21	14	1303930	1313480	-	1220	protein_coding	interleukin 21 [Source:ZFIN;Acc:ZDB-GENE-120510-4]	-
ENSDARG00000054878	2.04385	1.68548	1.89064	3.21396	0.421154	0.386794	0.421353	1.01788	six2b	12	25610019	25612170	-	1334	protein_coding	SIX homeobox 2b [Source:ZFIN;Acc:ZDB-GENE-080723-23]	Homeobox
ENSDARG00000019417	1.67259	0.53803	1.98031	0.843922	4.1676	10.8654	2.06237	17.4483	gadd45ga	8	31367667	31369161	-	1393	protein_coding	growth arrest and DNA-damage-inducible, gamma a [Source:ZFIN;Acc:ZDB-GENE-040426-1882]	-
ENSDARG00000029124	0.878765	0.781519	1.01363	1.08163	0.151884	0.149456	0.21708	0.471966	adamts15a	5	30179010	30209068	+	2877	protein_coding	ADAM metallopeptidase with thrombospondin type 1 motif, 15a [Source:ZFIN;Acc:ZDB-GENE-060526-203]	TSP_1
ENSDARG00000045517	2.85663	2.85545	3.60132	3.32074	0.654039	0.800906	0.836112	1.93639	itih5	4	25220674	25245817	+	3436	protein_coding	inter-alpha-trypsin inhibitor heavy chain family, member 5 [Source:ZFIN;Acc:ZDB-GENE-041210-193]	VWA
ENSDARG00000067872	1.87153	3.0742	1.52407	1.65557	7.75994	4.59285	9.43135	4.50115	CU469531.1	2	56487668	56493661	+	1086	unprocessed_pseudogene	-	zf-B_box
ENSDARG00000055510	3.65018	2.61913	2.13363	1.94689	4.73168	7.96185	6.86418	13.2329	ypel3	3	26186153	26191960	-	1847	protein_coding	yippee-like 3 [Source:ZFIN;Acc:ZDB-GENE-030516-4]	-
ENSDARG00000089908	0.0720184	0.0824869	0.0381677	0.150694	1.02781	0.416452	0.680491	0.197266	si:ch211-265o23.1	4	26036682	26051118	+	4130	protein_coding	si:ch211-265o23.1 [Source:ZFIN;Acc:ZDB-GENE-060503-509]	-
ENSDARG00000079347	2.99492	2.21175	2.98493	2.05772	4.61569	6.35868	6.98312	8.69316	zgc:194659	3	472158	474844	+	1109	protein_coding	zgc:194659 [Source:ZFIN;Acc:ZDB-GENE-081022-139]	-
ENSDARG00000077590	2.65154	2.45267	1.55485	2.15177	1.07913	0.717081	0.952622	0.994153	arsj	7	57677120	57691446	+	4917	protein_coding	arylsulfatase family, member J [Source:ZFIN;Acc:ZDB-GENE-111215-1]	Sulfatase
ENSDARG00000062304	2.07957	1.42911	1.34702	2.05482	4.5706	3.8915	7.72638	3.16453	pdpk1a	3	45283391	45308394	-	5149	protein_coding	3-phosphoinositide dependent protein kinase 1a [Source:ZFIN;Acc:ZDB-GENE-061013-109]	Pkinase
ENSDARG00000019949	0.823857	1.24557	1.64668	1.28059	0.163027	0.387927	0.355863	0.548039	serpinh1b	15	29382454	29388012	-	4212	protein_coding	serpin peptidase inhibitor, clade H (heat shock protein 47), member 1b [Source:ZFIN;Acc:ZDB-GENE-990415-93]	Serpin
ENSDARG00000104786	0.179792	0.52168	0.508185	0.599141	0.0503118	0.051983	0.113255	0.0820782	nlgn3a	14	14224730	14534457	+	4963	protein_coding	neuroligin 3a [Source:ZFIN;Acc:ZDB-GENE-071219-1]	COesterase
ENSDARG00000087012	0	0	0	0	0.0215927	0.193353	0.594079	0.023484	BX004816.2	3	3046909	3072467	+	5782	protein_coding	-	-
ENSDARG00000071697	8.77986	6.5369	4.70618	9.93569	3.16442	3.14249	2.73861	3.67385	zgc:66433	14	20918701	21001756	+	6431	protein_coding	zgc:66433 [Source:ZFIN;Acc:ZDB-GENE-030131-9832]	-
ENSDARG00000057714	1.05133	0.910969	0.545064	0.286938	6.07264	1.62558	6.04671	1.69027	cmah	4	2228754	2250264	+	2169	protein_coding	cytidine monophospho-N-acetylneuraminic acid hydroxylase [Source:ZFIN;Acc:ZDB-GENE-040704-33]	-
ENSDARG00000042210	1.72928	1.43047	1.65473	1.78687	0.463747	0.527761	0.342932	0.964879	sema3ab	18	9323211	9439922	+	3096	protein_coding	sema domain, immunoglobulin domain (Ig), short basic domain, secreted, (semaphorin) 3Ab [Source:ZFIN;Acc:ZDB-GENE-991209-6]	Sema
ENSDARG00000099833	11.6659	12.4708	10.4875	12.4562	21.1829	17.939	21.5196	20.0403	fbxo7	4	686157	700697	+	1721	protein_coding	F-box protein 7 [Source:ZFIN;Acc:ZDB-GENE-050913-68]	-
ENSDARG00000063223	0.578107	0.926996	1.07233	2.95694	4.54988	4.26225	6.31215	28.5029	arl14	2	6261413	6262441	-	1029	protein_coding	ADP-ribosylation factor-like 14 [Source:ZFIN;Acc:ZDB-GENE-070705-288]	Arf
ENSDARG00000019365	0.0785206	0.0719474	3.62039	1.05882	0	0	0	0.0716921	zgc:110712	11	11565996	11575070	-	1894	protein_coding	zgc:110712 [Source:ZFIN;Acc:ZDB-GENE-050417-50]	Filament
ENSDARG00000079922	14.5702	28.8417	62.1345	47.1087	10.9657	10.9799	9.68651	12.7989	klf4	21	419801	435466	-	1167	protein_coding	Kruppel-like factor 4 [Source:ZFIN;Acc:ZDB-GENE-111014-1]	-
ENSDARG00000105557	0.0475974	0.0654193	0.0756757	0.149392	0.539433	0.227069	0.854506	0.423716	BX511061.1	7	24840701	24853898	-	4166	unprocessed_pseudogene	-	-
ENSDARG00000053481	2.11127	1.52828	2.64064	2.33648	0.567172	0.927852	0.49651	1.07949	entpd5a	17	45030407	45040813	-	3522	protein_coding	ectonucleoside triphosphate diphosphohydrolase 5a [Source:ZFIN;Acc:ZDB-GENE-100419-1]	-
ENSDARG00000003017	68.176	78.0549	99.2132	78.6889	152.048	242.352	149.615	433.541	ube2al	9	8968702	8972763	+	1820	protein_coding	ubiquitin conjugating enzyme E2 A, like [Source:ZFIN;Acc:ZDB-GENE-030131-4195]	UQ_con
ENSDARG00000099889	10.6857	11.5773	15.0212	19.9278	29.4025	52.9954	30.4203	271.881	dusp27	KZ116034.1	1250	8270	+	3484	protein_coding	dual specificity phosphatase 27 [Source:ZFIN;Acc:ZDB-GENE-140513-1]	DSPc
ENSDARG00000036106	1.31687	1.7295	1.25622	1.42876	5.34329	2.48752	7.1892	3.28641	rgs18	2	6535865	6548838	-	1694	protein_coding	regulator of G protein signaling 18 [Source:ZFIN;Acc:ZDB-GENE-061013-722]	RGS
ENSDARG00000104882	0.500734	0.602196	0.0995155	0.174626	5.12322	2.93172	6.6239	0.342891	FP085399.5	16	45140858	45144372	-	792	processed_transcript	-	-
ENSDARG00000089995	1.24842	1.50138	0.827033	1.01587	7.99137	4.51192	7.47088	1.42481	BX511080.1	3	32066983	32071468	-	953	protein_coding	-	-
ENSDARG00000094557	0.0624341	0.0858114	0.496324	0	0.471721	1.84125	3.46092	4.44635	nupr1	3	15505275	15506158	+	794	protein_coding	nuclear protein 1 [Source:ZFIN;Acc:ZDB-GENE-030131-4653]	-
ENSDARG00000079075	0.368228	0.126526	0	0.256832	3.07195	1.27758	5.45095	0.378231	si:ch211-71m22.3	2	8644422	8648440	-	1077	protein_coding	si:ch211-71m22.3 [Source:ZFIN;Acc:ZDB-GENE-070705-195]	Scramblase
ENSDARG00000107385	0.277829	0.152743	0.164069	0.199317	0.0299877	0.0137706	0.0300019	0	aars2	22	25554232	25609123	+	6245	protein_coding	alanyl-tRNA synthetase 2, mitochondrial (putative) [Source:ZFIN;Acc:ZDB-GENE-041008-213]	-
ENSDARG00000017038	2.83813	15.0631	4.55866	4.0606	65.3385	33.2779	39.1666	11.6808	zgc:152670	2	44348473	44362943	+	3406	protein_coding	zgc:152670 [Source:ZFIN;Acc:ZDB-GENE-060929-954]	-
ENSDARG00000098529	0.512379	0.748244	0.695837	0.208468	2.41955	1.40736	2.04414	1.4327	ccne2	16	40575742	40586793	+	4644	protein_coding	cyclin E2 [Source:ZFIN;Acc:ZDB-GENE-030131-9689]	Cyclin_C
ENSDARG00000036816	1.29571	0.815336	0.570862	0.827515	6.04488	4.27887	6.04773	0.769682	pou2f2a	19	6213680	6303099	-	6351	protein_coding	POU class 2 homeobox 2a [Source:ZFIN;Acc:ZDB-GENE-060310-2]	Pou
ENSDARG00000015559	6.10226	12.8062	13.4577	19.9538	21.6895	53.8408	41.7462	71.1724	fstl1a	1	47459723	47485360	+	1511	protein_coding	follistatin-like 1a [Source:ZFIN;Acc:ZDB-GENE-030131-4148]	-
ENSDARG00000034650	7.07129	9.61776	3.63047	2.9798	43.5023	23.6397	69.6923	6.25457	fabp7b	20	40369257	40370736	-	673	protein_coding	fatty acid binding protein 7, brain, b [Source:ZFIN;Acc:ZDB-GENE-040614-4]	-
ENSDARG00000010792	1.25835	1.32382	1.35847	1.36527	3.65822	2.23684	4.01224	2.42549	cdc25b	13	14915344	14929236	-	3191	protein_coding	cell division cycle 25B [Source:ZFIN;Acc:ZDB-GENE-000330-5]	Rhodanese
ENSDARG00000096554	0.516872	0.632905	0.224122	0.367063	2.852	1.33683	2.29688	0.695012	si:dkey-25o16.4	1	26676758	26700439	+	5275	protein_coding	si:dkey-25o16.4 [Source:ZFIN;Acc:ZDB-GENE-030131-969]	-
ENSDARG00000014248	1.96173	1.24114	3.61406	1.65061	4.11719	7.02239	7.45367	23.2847	pdlim3b	14	29782508	29800107	-	1592	protein_coding	PDZ and LIM domain 3b [Source:ZFIN;Acc:ZDB-GENE-060130-104]	PDZ
ENSDARG00000069735	288.383	88.3087	33.6786	243.135	43.9406	28.2083	33.9953	24.0753	hbaa2	3	55093581	55094399	+	564	protein_coding	hemoglobin, alpha adult 2 [Source:ZFIN;Acc:ZDB-GENE-081104-38]	-
ENSDARG00000013168	11.5234	6.97079	11.0978	13.1362	5.20357	5.65336	5.17829	4.32243	jag1b	13	35339182	35390095	+	6754	protein_coding	jagged 1b [Source:ZFIN;Acc:ZDB-GENE-011128-4]	EGF
ENSDARG00000067630	2.36838	2.69394	1.81784	2.96203	5.89621	4.81698	5.31596	4.77223	zgc:154075	23	20803270	20814484	+	1821	protein_coding	zgc:154075 [Source:ZFIN;Acc:ZDB-GENE-060929-910]	GFO_IDH_MocA
ENSDARG00000043492	1.37798	1.13636	0.657258	1.34556	6.11664	2.92833	7.59516	1.88721	irf1a	13	311380	318827	+	1439	protein_coding	interferon regulatory factor 1a [Source:ZFIN;Acc:ZDB-GENE-060421-4031]	IRF
ENSDARG00000032197	1.03163	2.01492	1.59704	4.09004	0.47861	0.23548	0.376228	0.743619	klf12b	9	30720048	30783892	+	1826	protein_coding	Kruppel-like factor 12b [Source:ZFIN;Acc:ZDB-GENE-071004-22]	zf-C2H2
ENSDARG00000038066	2.28245	3.98301	2.52799	1.03746	24.2528	11.2557	20.0318	2.17761	kpna2	3	25369965	25377163	-	1933	protein_coding	karyopherin alpha 2 (RAG cohort 1, importin alpha 1) [Source:ZFIN;Acc:ZDB-GENE-040718-22]	Arm
ENSDARG00000024669	11.4331	10.2761	8.97321	12.2964	19.9656	22.4077	17.7026	32.4322	oser1	6	52715708	52723901	-	1704	protein_coding	oxidative stress responsive serine-rich 1 [Source:ZFIN;Acc:ZDB-GENE-040426-1325]	-
ENSDARG00000073688	0.583559	0.603009	0.765272	0.487237	1.33023	1.50004	0.949849	1.6101	nav2a	7	16806473	17015002	+	11638	protein_coding	neuron navigator 2a [Source:ZFIN;Acc:ZDB-GENE-120502-3]	CH
ENSDARG00000096508	1.34053	0.95808	0.554143	0.897592	2.56585	2.279	4.69502	2.49685	BX322618.1	20	12203762	12208117	+	1849	lincRNA	-	-
ENSDARG00000019008	22.585	22.079	22.9297	18.2258	39.6184	34.3081	32.5612	39.8945	erp44	16	27417200	27442344	-	2083	protein_coding	endoplasmic reticulum protein 44 [Source:ZFIN;Acc:ZDB-GENE-040426-1902]	-
ENSDARG00000060641	1.37125	0.875712	1.01301	1.73894	0.296512	0.336396	0.488603	0.53115	prkaa2	20	8028613	8067973	+	3579	protein_coding	protein kinase, AMP-activated, alpha 2 catalytic subunit [Source:ZFIN;Acc:ZDB-GENE-081120-5]	Pkinase
ENSDARG00000092985	5.16382	6.74245	3.01034	3.60166	1.73401	0.895805	0.542135	0.94295	CU499330.1	21	43841656	43848930	+	576	processed_transcript	-	-
ENSDARG00000010347	0.5984	2.77039	0.701034	1.01048	12.8894	5.46361	12.8558	1.63908	acer1	8	20232421	20245892	-	1574	protein_coding	alkaline ceramidase 1 [Source:ZFIN;Acc:ZDB-GENE-050417-70]	-
ENSDARG00000020976	1.71015	1.75164	1.35084	1.59546	3.12739	2.43763	4.19927	4.1174	ubald1b	3	54833658	54846444	-	4551	protein_coding	UBA-like domain containing 1b [Source:ZFIN;Acc:ZDB-GENE-050522-446]	-
ENSDARG00000069961	2.14994	1.39223	1.01889	1.41303	6.29971	3.47862	10.8604	2.54809	il21r.1	3	45343782	45361573	-	2398	protein_coding	interleukin 21 receptor, tandem duplicate 1 [Source:ZFIN;Acc:ZDB-GENE-080108-6]	-
ENSDARG00000044129	7.69762	6.5595	5.75212	3.97302	17.9325	13.8878	43.8341	12.2291	si:ch211-214p16.1	17	25585487	25586858	-	644	processed_transcript	si:ch211-214p16.1 [Source:NCBI gene;Acc:368901]	-
ENSDARG00000001993	1.43274	2.53808	3.59406	3.94171	3.54821	11.9026	7.60117	73.6482	myhb	6	40745437	40756138	-	6228	protein_coding	myosin, heavy chain b [Source:ZFIN;Acc:ZDB-GENE-081124-1]	Myosin_head
ENSDARG00000001558	0.910123	1.38398	1.16993	0.945437	4.68183	2.62023	4.41569	1.64427	kifc1	19	6990970	7000603	+	2560	protein_coding	kinesin family member C1 [Source:ZFIN;Acc:ZDB-GENE-000208-21]	Kinesin
ENSDARG00000097691	6.48009	7.12515	5.15139	3.61579	17.1361	14.3329	26.9409	11.0935	pclaf	25	186583	189982	+	306	protein_coding	PCNA clamp associated factor [Source:ZFIN;Acc:ZDB-GENE-131127-543]	-
ENSDARG00000105263	11.533	15.3258	8.00319	6.84409	38.594	24.7601	56.2727	17.8021	ccl36.1	7	39706004	39707161	+	778	protein_coding	chemokine (C-C motif) ligand 36, duplicate 1 [Source:ZFIN;Acc:ZDB-GENE-140718-2]	-
ENSDARG00000102349	1.30692	1.30074	0.429907	0.81725	6.10057	4.22168	6.67121	1.11097	cep55l	12	5102670	5113389	+	2200	protein_coding	centrosomal protein 55 like [Source:ZFIN;Acc:ZDB-GENE-050522-222]	-
ENSDARG00000099031	1.38765	0.953616	2.01605	1.53523	0.210893	0.37354	0.210993	0.720865	scn4ba	15	12466852	12500938	-	2072	protein_coding	sodium channel, voltage-gated, type IV, beta a [Source:ZFIN;Acc:ZDB-GENE-070615-18]	V-set
ENSDARG00000041006	4.45685	4.01211	4.26818	5.30819	1.31282	1.89899	1.18209	2.78423	st3gal4	18	48696094	48745517	-	1902	protein_coding	ST3 beta-galactoside alpha-2,3-sialyltransferase 4 [Source:ZFIN;Acc:ZDB-GENE-050309-174]	Glyco_transf_29
ENSDARG00000103479	1.46642	1.21533	0.995463	1.19518	0.567117	0.390637	0.712691	0.421225	ptprfa	6	2951645	3276052	+	9026	protein_coding	protein tyrosine phosphatase, receptor type, f, a [Source:ZFIN;Acc:ZDB-GENE-020107-2]	Y_phosphatase
ENSDARG00000078650	2.49859	1.82883	2.89126	3.03171	1.24737	1.07721	0.819556	0.404965	kcna4	7	32595981	32599669	-	3353	protein_coding	potassium voltage-gated channel, shaker-related subfamily, member 4 [Source:ZFIN;Acc:ZDB-GENE-121127-2]	Ion_trans
ENSDARG00000018566	49.0379	64.5315	114.107	101.775	138.679	259.774	225.008	627.933	flnca	25	35019693	35041057	+	9456	protein_coding	filamin C, gamma a (actin binding protein 280) [Source:ZFIN;Acc:ZDB-GENE-070503-1]	CH
ENSDARG00000060551	0.742075	0.531513	0.448669	0.69983	0.131614	0.108788	0.223849	0.257656	rps6ka5	17	38393189	38442362	-	4743	protein_coding	ribosomal protein S6 kinase, polypeptide 5 [Source:ZFIN;Acc:ZDB-GENE-130530-693]	Pkinase
ENSDARG00000101446	0.809064	0.727607	1.36575	0.445872	0.176091	0.103966	0.163591	0.383032	PCP4L1	7	73630751	73656365	+	4963	protein_coding	si:dkey-46i9.1 [Source:ZFIN;Acc:ZDB-GENE-141216-493]	-
ENSDARG00000078696	9.75167	9.85708	13.5894	15.6365	21.9227	39.9714	23.0797	78.1643	synpo2lb	12	26408351	26430507	-	7244	protein_coding	synaptopodin 2-like b [Source:ZFIN;Acc:ZDB-GENE-090828-5]	PDZ
ENSDARG00000034624	1.26032	1.44352	0.811063	1.17207	4.76118	2.70694	5.21709	1.97266	nuf2	11	429776	438518	-	1652	protein_coding	NUF2, NDC80 kinetochore complex component, homolog [Source:ZFIN;Acc:ZDB-GENE-040426-1121]	-
ENSDARG00000073820	14.1696	4.72474	8.36485	10.1169	141.715	40.7623	69.4519	5.45436	zgc:174917	14	11504504	11507426	-	2365	protein_coding	zgc:174917 [Source:ZFIN;Acc:ZDB-GENE-070928-42]	PhyH
ENSDARG00000045863	0.395452	0.155292	0.404186	0.512237	0.853667	2.35206	1.10317	2.63059	asb15b	4	4120570	4129187	-	1755	protein_coding	ankyrin repeat and SOCS box containing 15b [Source:ZFIN;Acc:ZDB-GENE-041210-265]	SOCS_box
ENSDARG00000034852	136.981	135.125	91.8641	277.742	67.4984	52.137	52.8134	65.8672	nt5c2l1	10	17460358	17484764	-	2682	protein_coding	5'-nucleotidase, cytosolic II, like 1 [Source:ZFIN;Acc:ZDB-GENE-031006-8]	-
ENSDARG00000038583	61.5941	51.8246	58.6196	78.9341	110.179	230.741	108.488	451.965	abraa	6	52064304	52072829	+	4800	protein_coding	actin binding Rho activating protein a [Source:ZFIN;Acc:ZDB-GENE-120730-1]	-
ENSDARG00000020057	2.32279	1.80801	1.97841	2.67813	1.28341	0.884026	0.806242	0.5843	bmpr2b	9	12959760	13111163	+	4183	protein_coding	bone morphogenetic protein receptor, type II b (serine/threonine kinase) [Source:ZFIN;Acc:ZDB-GENE-070618-2]	Pkinase
ENSDARG00000011023	0	0.090604	0.0524044	0.229893	0.539573	0.686148	1.53643	0.902824	pdlim3a	1	17721853	17735861	-	1504	protein_coding	PDZ and LIM domain 3a [Source:ZFIN;Acc:ZDB-GENE-050505-1]	PDZ
ENSDARG00000104800	0.555077	0.70423	0.339433	0.119125	2.52709	1.18515	2.95863	1.75432	si:ch211-175m2.4	14	21222287	21230168	+	1161	protein_coding	si:ch211-175m2.4 [Source:ZFIN;Acc:ZDB-GENE-141222-24]	-
ENSDARG00000100606	3.61755	3.91867	5.89781	3.76337	2.00746	1.75505	0.92696	1.76344	BX539336.1	23	27912079	28007307	+	1617	protein_coding	-	RhoGEF
ENSDARG00000069029	2.18382	3.06821	3.00914	1.48932	0.366663	1.01025	0.580824	0.996951	acss2l	2	54586647	54639964	-	2043	protein_coding	acyl-CoA synthetase short chain family member 2 like [Source:ZFIN;Acc:ZDB-GENE-130530-723]	AMP-binding
ENSDARG00000098377	2.47381	2.3256	1.41321	1.79266	9.87139	3.38118	22.5854	3.37335	tnfrsf11b	19	142044	148055	+	4629	protein_coding	tumor necrosis factor receptor superfamily, member 11b [Source:ZFIN;Acc:ZDB-GENE-081104-76]	-
ENSDARG00000051923	1.38459	1.9607	0.633732	0.936463	10.1707	4.62194	9.32976	1.20672	ccnb1	5	54711027	54714789	-	2363	protein_coding	cyclin B1 [Source:ZFIN;Acc:ZDB-GENE-000406-10]	Cyclin_C
ENSDARG00000075621	1.0447	0.694774	0.37506	0.799173	7.04449	3.2154	3.01443	1.01539	birc5a	12	34429702	34435604	-	1471	protein_coding	baculoviral IAP repeat containing 5a [Source:ZFIN;Acc:ZDB-GENE-030826-1]	BIR
ENSDARG00000010948	0.900344	1.62532	0.640956	0.356164	7.8517	2.93729	5.19744	1.3619	kif11	17	19481049	19497006	+	3689	protein_coding	kinesin family member 11 [Source:ZFIN;Acc:ZDB-GENE-020426-1]	Kinesin
ENSDARG00000010482	1.31433	1.80646	1.97139	2.17938	0.312278	0.344161	0.906035	0.475484	prg4a	2	20793982	20812059	+	1999	protein_coding	proteoglycan 4a [Source:ZFIN;Acc:ZDB-GENE-030131-8295]	Somatomedin_B
ENSDARG00000030896	66.8092	31.7177	20.0438	35.2715	8.34119	6.17796	19.5168	8.09636	foxq1a	2	720779	722170	-	1392	protein_coding	forkhead box Q1a [Source:ZFIN;Acc:ZDB-GENE-070424-74]	Fork_head
ENSDARG00000074894	3.19263	2.83485	2.42492	3.68193	5.11496	11.4471	5.45588	23.2693	myorg	21	13045388	13055195	-	6273	protein_coding	myogenesis regulating glycosidase (putative) [Source:ZFIN;Acc:ZDB-GENE-091113-62]	Glyco_hydro_31
ENSDARG00000053454	0.131719	0.127792	0.0369567	0.0324251	0.282949	0.349473	0.361175	0.615467	cntn3b	6	44584775	44711942	-	6398	protein_coding	contactin 3b [Source:ZFIN;Acc:ZDB-GENE-130530-645]	fn3
ENSDARG00000087978	0.374335	0.955496	0.255069	0.372988	4.71382	1.94816	4.04232	0.878866	CU657980.2	23	39944652	39945578	-	927	unprocessed_pseudogene	-	7tm_1
ENSDARG00000063370	3.02912	1.73471	1.29662	2.35653	0.757993	0.909489	0.562648	0.691423	sgk2a	23	4324625	4344591	+	2553	protein_coding	serum/glucocorticoid regulated kinase 2a [Source:ZFIN;Acc:ZDB-GENE-030131-9632]	Pkinase
ENSDARG00000012199	30.7733	33.8455	30.1115	40.6335	18.1507	22.4316	14.8281	18.6365	gpt2	7	41887429	41901688	+	4612	protein_coding	glutamic pyruvate transaminase (alanine aminotransferase) 2 [Source:ZFIN;Acc:ZDB-GENE-030729-8]	Aminotran_1_2
ENSDARG00000100794	0.482403	0.410447	0.182614	0.224311	0.520686	0.91656	3.32817	3.209	mmp13b	15	33825750	33834577	-	2158	protein_coding	matrix metallopeptidase 13b [Source:ZFIN;Acc:ZDB-GENE-030131-6152]	Hemopexin
ENSDARG00000053113	11.8598	12.5388	9.81401	14.5324	22.3831	19.9486	20.4287	20.4342	ly75	11	11120532	11193205	+	6738	protein_coding	lymphocyte antigen 75 [Source:ZFIN;Acc:ZDB-GENE-050309-166]	Lectin_C
ENSDARG00000078970	3.61755	3.28662	1.36478	3.07912	9.49685	5.74379	20.3931	6.46594	il7r	21	22429509	22435957	-	1617	protein_coding	interleukin 7 receptor [Source:ZFIN;Acc:ZDB-GENE-080110-7]	-
ENSDARG00000114385	0	0	0	0	0.834945	0.0676611	0.83534	0.320499	BX005305.4	12	46404307	46408636	+	1271	protein_coding	-	-
ENSDARG00000000656	35.1695	47.6289	32.0597	20.9315	106.603	63.174	103.35	63.1228	psmb9a	19	7120380	7122373	+	1153	protein_coding	proteasome subunit beta 9a [Source:ZFIN;Acc:ZDB-GENE-990415-140]	Proteasome
ENSDARG00000037873	0.311918	0.42871	0.141692	0.435113	1.71141	1.31412	2.94726	0.488215	cyp3c3	3	40947961	40955780	-	2225	protein_coding	cytochrome P450, family 3, subfamily c, polypeptide 3 [Source:ZFIN;Acc:ZDB-GENE-041114-102]	p450
ENSDARG00000104518	2.76905	2.8776	2.14758	1.69582	6.54861	7.14691	11.742	3.88485	si:dkeyp-13d12.23	2	31856242	31859536	-	734	IG_C_gene	si:dkeyp-13d12.23 [Source:ZFIN;Acc:ZDB-GENE-141212-2]	-
ENSDARG00000094246	0.0113387	0.0155842	0.036055	0.031634	0.171339	0.31472	0.25713	0.124231	si:dkey-222h21.10	1	58312187	58466934	+	4372	protein_coding	si:dkey-222h21.10 [Source:ZFIN;Acc:ZDB-GENE-081031-22]	NACHT
ENSDARG00000024815	0.893055	1.51757	0.6454	1.31373	6.82927	3.183	7.05752	1.24532	ogfrl2	11	20091255	20096018	-	3053	protein_coding	opioid growth factor receptor-like 2 [Source:ZFIN;Acc:ZDB-GENE-030616-523]	-
ENSDARG00000098700	1.31661	1.21995	1.01137	1.85726	2.17955	3.46453	4.84572	3.24165	il1b	10	44955106	44964776	+	3351	protein_coding	interleukin 1, beta [Source:ZFIN;Acc:ZDB-GENE-040702-2]	-
ENSDARG00000078249	0.82249	0.920514	0.504394	0.770358	1.53879	1.67143	2.29447	1.51265	unc13d	12	36474565	36521947	-	4219	protein_coding	unc-13 homolog D (C. elegans) [Source:ZFIN;Acc:ZDB-GENE-110411-188]	C2
ENSDARG00000102758	4.86843	3.22355	1.58197	2.08199	22.8666	10.6032	21.1761	2.82277	FO704661.1	8	52479026	52490474	+	1395	protein_coding	Danio rerio gamma-glutamyl hydrolase (LOC553228), mRNA. [Source:RefSeq mRNA;Acc:NM_001256222]	-
ENSDARG00000096502	2.84228	2.98733	2.25949	4.08148	9.68473	6.67095	8.32017	5.95346	BX088688.1	20	22179916	22180508	+	593	lincRNA	-	-
ENSDARG00000114670	2.14137	3.45822	1.19161	0.746781	14.9657	7.70818	12.4098	2.49281	ube2c	6	55287823	55297274	-	926	protein_coding	ubiquitin-conjugating enzyme E2C [Source:ZFIN;Acc:ZDB-GENE-051030-48]	UQ_con
ENSDARG00000079987	0.593685	0.271993	0.786589	0	2.86579	1.88816	13.8371	1.35514	igl3v5	24	38202298	38205136	-	501	protein_coding	immunoglobulin light 3 variable 5 [Source:ZFIN;Acc:ZDB-GENE-051013-3]	C1-set
ENSDARG00000009438	0.385884	0.592042	0.741934	0.913847	0.881445	3.67403	1.36802	7.93962	myog	11	22592935	22605981	-	5524	protein_coding	myogenin [Source:ZFIN;Acc:ZDB-GENE-980526-265]	Basic
ENSDARG00000100149	1.16312	0.905246	0.701827	1.15335	0.185288	0.303877	0.291304	0.594958	axin2	3	55627948	55650771	-	7075	protein_coding	axin 2 (conductin, axil) [Source:ZFIN;Acc:ZDB-GENE-000403-2]	DIX
ENSDARG00000058365	9.42372	11.0034	8.34117	11.5938	10.8917	23.1218	44.7277	102.175	hspb8	5	15819651	15840485	+	4545	protein_coding	heat shock protein b8 [Source:ZFIN;Acc:ZDB-GENE-030131-2480]	-
ENSDARG00000044551	4.65078	4.25768	2.56058	3.26675	8.72265	7.38382	7.37066	6.36948	atg9a	6	11249706	11267002	+	6033	protein_coding	ATG9 autophagy related 9 homolog A (S. cerevisiae) [Source:ZFIN;Acc:ZDB-GENE-070209-65]	-
ENSDARG00000056467	0.303329	0.893368	0.137791	0.302238	2.29181	1.65379	2.51126	1.30562	tmub2	3	20012891	20021596	+	1144	protein_coding	transmembrane and ubiquitin-like domain containing 2 [Source:ZFIN;Acc:ZDB-GENE-030616-254]	ubiquitin
ENSDARG00000036930	0.849939	0.496477	0.743231	1.54132	0.133786	0.184306	0.214158	0.291009	tbx18	23	31107685	31118371	+	2333	protein_coding	T-box 18 [Source:ZFIN;Acc:ZDB-GENE-020529-2]	T-box
ENSDARG00000098127	0	0.490763	1.13541	0.498093	5.69538	2.168	3.82371	2.77112	BX324212.1	4	38564564	38573606	-	833	lincRNA	-	-
ENSDARG00000090444	9.01635	15.8584	12.6875	7.27662	42.5878	25.5894	62.628	16.1806	ponzr1	7	20344032	20369869	+	1435	protein_coding	plac8 onzin related protein 1 [Source:ZFIN;Acc:ZDB-GENE-070727-1]	-
ENSDARG00000028027	0.0653131	0.0897684	0	0.0455547	0.370105	0.793123	0.329138	1.16285	trim63a	6	15651977	15653494	-	1518	protein_coding	tripartite motif containing 63a [Source:ZFIN;Acc:ZDB-GENE-040625-139]	zf-B_box
ENSDARG00000007769	1.05154	1.06675	0.358256	0.768355	8.9538	2.69284	7.47554	0.617203	sult5a1	7	56602521	56606752	-	1980	protein_coding	sulfotransferase family 5A, member 1 [Source:ZFIN;Acc:ZDB-GENE-060929-978]	Sulfotransfer_1
ENSDARG00000067859	0.0245948	0.0144874	0.022345	0.00980253	0.03982	0.219427	0.0973837	0.115488	scospondin	24	40016889	40171461	+	14109	protein_coding	subcommissural organ spondin [Source:ZFIN;Acc:ZDB-GENE-051114-1]	VWD
ENSDARG00000105142	3.98364	3.45804	3.50017	3.07098	6.68303	5.29668	9.36066	6.38903	tcirg1b	14	16777308	16810489	-	3783	protein_coding	T cell immune regulator 1, ATPase H+ transporting V0 subunit a3b [Source:ZFIN;Acc:ZDB-GENE-040426-2022]	-
ENSDARG00000076862	2.29316	1.22363	1.2439	1.20428	0.645477	0.631817	0.390868	0.517275	fam198a	16	8188188	8251985	-	3675	protein_coding	family with sequence similarity 198, member A [Source:ZFIN;Acc:ZDB-GENE-121130-2]	-
ENSDARG00000055750	0.694684	0.916604	0.618513	1.12411	2.62434	1.59076	8.89198	2.13115	foxp3a	8	25716308	25729543	-	1784	protein_coding	forkhead box P3a [Source:ZFIN;Acc:ZDB-GENE-061116-2]	Fork_head
ENSDARG00000105040	2.94216	1.98375	2.40824	2.31207	1.24829	0.646596	0.859228	1.43366	fam69c	24	2889335	2917540	-	6251	protein_coding	family with sequence similarity 69, member C [Source:ZFIN;Acc:ZDB-GENE-030131-8001]	-
ENSDARG00000030656	8.78305	5.90697	3.87621	11.271	3.01101	3.17203	2.10674	2.9537	2022-09-03	1	45616067	45636362	-	3172	protein_coding	septin 3 [Source:ZFIN;Acc:ZDB-GENE-050522-375]	GTP_CDC
ENSDARG00000020258	1.37203	3.00823	1.99962	1.38987	6.91091	3.6269	6.74955	3.89235	ewsr1a	10	7975585	7988417	-	3035	protein_coding	EWS RNA-binding protein 1a [Source:ZFIN;Acc:ZDB-GENE-030131-2317]	zf-RanBP
ENSDARG00000053215	4.84711	9.05703	9.4261	9.1085	1.94209	4.41279	1.28693	3.0723	me1	16	32832213	33001153	-	2475	protein_coding	malic enzyme 1, NADP(+)-dependent, cytosolic [Source:ZFIN;Acc:ZDB-GENE-061013-438]	Malic_M
ENSDARG00000092362	2.3042	6.00836	4.27977	3.72495	1.2474	1.41959	0.841039	2.12348	hsp70.2	3	26119603	26122353	-	2302	protein_coding	heat shock cognate 70-kd protein, tandem duplicate 2 [Source:ZFIN;Acc:ZDB-GENE-110405-1]	HSP70
ENSDARG00000114825	1.00206	0.729141	1.03089	0.849667	0.173195	0.374938	0.148523	0.376731	CABZ01077124.1	5	11290851	11361593	+	2523	protein_coding	-	-
ENSDARG00000005993	0.68419	0.769395	0.593347	0.289218	3.42016	1.72642	3.18669	0.795059	prc1b	7	50353297	50367642	-	2391	protein_coding	protein regulator of cytokinesis 1b [Source:ZFIN;Acc:ZDB-GENE-040426-777]	-
ENSDARG00000037266	23.9221	33.1338	44.463	51.6702	63.1629	100.616	85.67	186.937	myoz2b	1	25917591	25936679	-	1606	protein_coding	myozenin 2b [Source:ZFIN;Acc:ZDB-GENE-040426-1853]	-
ENSDARG00000076800	2.06016	3.31822	1.07477	1.34712	11.6336	5.36087	14.2346	2.55699	tnfrsf18	6	42975278	42983843	-	1540	protein_coding	tumor necrosis factor receptor superfamily, member 18 [Source:ZFIN;Acc:ZDB-GENE-101104-7]	-
ENSDARG00000096603	0.220463	0.129862	0.0500739	0.175736	1.62605	1.14736	0.833248	0.129401	bmb	25	36292057	36310015	+	3148	protein_coding	brambleberry [Source:ZFIN;Acc:ZDB-GENE-030131-5577]	-
ENSDARG00000078193	1.30965	1.66669	0.848316	1.48859	3.4816	4.62803	11.2441	2.25865	si:ch211-67e16.3	9	14010823	14019390	+	1022	protein_coding	si:ch211-67e16.3 [Source:ZFIN;Acc:ZDB-GENE-070912-310]	-
ENSDARG00000057006	1.41276	0.866847	1.04286	0.633453	2.57322	2.7134	2.06591	2.69496	fam241a	13	12664866	12667220	-	1965	protein_coding	family with sequence similarity 241 member A [Source:ZFIN;Acc:ZDB-GENE-050522-524]	-
ENSDARG00000099183	0.576426	0.826704	1.03601	0.62929	0.0946781	0.260861	0.0631485	0.205942	fkbp10a	19	18493782	18597568	+	1978	protein_coding	FK506 binding protein 10a [Source:ZFIN;Acc:ZDB-GENE-100921-75]	FKBP_C
ENSDARG00000099002	1.05893	1.48927	3.95452	1.68328	5.05473	9.52677	3.81611	15.0422	creb5a	19	19496479	19505167	-	2013	protein_coding	cAMP responsive element binding protein 5a [Source:ZFIN;Acc:ZDB-GENE-120827-2]	bZIP_1
ENSDARG00000052011	1.22016	0.975017	1.66926	1.46458	6.25316	11.4204	1.14398	5.12982	rrad	7	44960188	44963154	-	1747	protein_coding	Ras-related associated with diabetes [Source:ZFIN;Acc:ZDB-GENE-030131-5607]	Ras
ENSDARG00000030224	10.5197	7.53798	9.99767	12.3333	4.16758	3.23976	2.85912	6.66945	ppp2ca	14	49118860	49133426	-	2097	protein_coding	protein phosphatase 2, catalytic subunit, alpha isozyme [Source:ZFIN;Acc:ZDB-GENE-050417-441]	Metallophos
ENSDARG00000103124	0.630543	0.990443	1.81406	2.01048	0.378101	0.208352	0.151312	0.41122	slc35f4	17	44502707	44584938	-	1651	protein_coding	solute carrier family 35, member F4 [Source:ZFIN;Acc:ZDB-GENE-131121-49]	-
ENSDARG00000036316	33.6488	33.5889	28.3114	24.6115	24.9491	225.326	87.0023	143.073	rpl39	14	33331773	33348221	-	1211	protein_coding	ribosomal protein L39 [Source:ZFIN;Acc:ZDB-GENE-040625-51]	-
ENSDARG00000075191	0.0438115	0.752698	0.626908	0.702826	0	0	0.0275978	0.0600021	oacyl	21	10828828	10846928	+	2263	protein_coding	O-acyltransferase like [Source:ZFIN;Acc:ZDB-GENE-090710-2]	-
ENSDARG00000058771	0.351536	0.43318	0.539639	0.448105	0.175542	0.199774	0.114538	0.19922	nav1b	6	54888493	55022544	+	8179	protein_coding	neuron navigator 1b [Source:ZFIN;Acc:ZDB-GENE-120215-84]	-
ENSDARG00000089429	0.669463	0.519429	0.618032	0.497063	0.231151	0.131122	0.0544142	0.23661	si:dkey-205h13.2	23	26523998	26536055	-	4591	protein_coding	si:dkey-205h13.2 [Source:ZFIN;Acc:ZDB-GENE-080225-18]	-
ENSDARG00000039150	35.3279	25.0252	26.6627	30.2361	58.134	41.9402	67.9945	50.8986	lgmn	13	36037970	36050327	-	4103	protein_coding	legumain [Source:ZFIN;Acc:ZDB-GENE-021030-1]	-
ENSDARG00000060917	1.67796	2.10569	1.13092	1.46293	7.1083	3.49621	7.39888	1.9983	anln	19	35433155	35450857	-	5436	protein_coding	anillin, actin binding protein [Source:ZFIN;Acc:ZDB-GENE-030131-4486]	PH
ENSDARG00000092427	5.14433	11.9985	35.1947	15.2221	35.9235	76.8026	52.8305	149.022	si:dkey-24c2.7	2	23773078	23778180	-	318	protein_coding	si:dkey-24c2.7 [Source:ZFIN;Acc:ZDB-GENE-070912-474]	-
ENSDARG00000014477	0.539178	0.697471	1.51279	0.486674	0	0.165062	0.119873	0	sstr3	3	29600917	29602479	+	1563	protein_coding	somatostatin receptor 3 [Source:ZFIN;Acc:ZDB-GENE-061009-35]	7tm_1
ENSDARG00000103049	0.314656	0.0786315	0.272878	0.319224	0.648378	1.09171	1.0451	1.56705	CR392341.4	10	28392426	28395620	-	1733	protein_coding	-	C1-set
ENSDARG00000078640	2.15284	1.49521	2.05734	2.07664	4.68652	5.99935	2.40929	9.34716	fam117aa	3	20983395	21010979	-	4329	protein_coding	family with sequence similarity 117, member Aa [Source:ZFIN;Acc:ZDB-GENE-110606-4]	-
ENSDARG00000101366	3.51776	3.56257	2.72288	2.71184	0.699433	1.84681	0.758077	0.633916	gpr1	9	1235778	1236848	-	1071	protein_coding	G protein-coupled receptor 1 [Source:ZFIN;Acc:ZDB-GENE-091204-457]	7tm_1
ENSDARG00000091511	2.04634	2.95319	4.14822	1.42729	0.966322	0.443742	0.644519	0.560515	gpx7	23	42219613	42232124	-	969	protein_coding	glutathione peroxidase 7 [Source:ZFIN;Acc:ZDB-GENE-050522-419]	GSHPx
ENSDARG00000015144	0	0	0	0	0.287911	0.865381	0	0.341597	sh2d4bb	12	29289387	29305533	-	2385	protein_coding	SH2 domain containing 4Bb [Source:ZFIN;Acc:ZDB-GENE-130531-42]	SH2
ENSDARG00000062116	11.0195	10.5811	11.856	13.4766	6.8051	6.59906	5.2869	7.60792	ctdsplb	2	21356242	21381406	+	1642	protein_coding	CTD (carboxy-terminal domain, RNA polymerase II, polypeptide A) small phosphatase-like b [Source:ZFIN;Acc:ZDB-GENE-060929-488]	NIF
ENSDARG00000099421	22.5996	15.6095	16.6006	10.6363	8.0157	7.30877	4.70207	2.32057	si:ch73-236c18.9	1	58508790	58526999	+	2165	protein_coding	si:ch73-236c18.9 [Source:ZFIN;Acc:ZDB-GENE-121214-125]	HD
ENSDARG00000045864	2.9652	2.66757	3.51437	12.3714	13.1027	20.7628	14.6711	56.4847	lmod2b	4	4115778	4119425	-	1839	protein_coding	leiomodin 2 (cardiac) b [Source:ZFIN;Acc:ZDB-GENE-041210-356]	-
ENSDARG00000096720	0.0933572	0	0	0	1.99852	1.94344	2.2347	0	CR352342.1	12	31608905	31612987	+	531	protein_coding	-	-
ENSDARG00000076135	0.704886	0.58129	1.12071	0.87602	0.225941	0.422427	0.177609	0.210628	mmrn2a	13	22619684	22646134	-	3868	protein_coding	multimerin 2a [Source:ZFIN;Acc:ZDB-GENE-080424-3]	-
ENSDARG00000054321	5.23129	3.16704	14.1262	5.96537	0.627381	0.864294	0.627678	3.46854	ngs	4	5776347	5784895	+	2388	protein_coding	notochord granular surface [Source:ZFIN;Acc:ZDB-GENE-080722-29]	Filament
ENSDARG00000055133	0.313919	0.419306	0.1898	0.18503	1.65359	1.01245	1.40928	0.266435	cenpf	17	32720413	32743249	-	11212	protein_coding	centromere protein F [Source:ZFIN;Acc:ZDB-GENE-041111-205]	-
ENSDARG00000007697	7.74212	9.29103	11.207	4.59401	2.03716	3.80874	1.96533	3.79817	fabp7a	17	15433518	15435887	+	858	protein_coding	fatty acid binding protein 7, brain, a [Source:ZFIN;Acc:ZDB-GENE-000627-1]	-
ENSDARG00000057426	1.5062	0.776311	0.778284	1.26065	1.89668	3.95202	2.22965	7.42613	oard1	23	19220381	19225709	-	2633	protein_coding	O-acyl-ADP-ribose deacylase 1 [Source:ZFIN;Acc:ZDB-GENE-050522-480]	A1pp
ENSDARG00000054304	0.421497	0.611502	0.148921	0.19599	0	0	0.0295011	0	homeza	2	38271392	38275658	+	2117	protein_coding	homeobox and leucine zipper encoding a [Source:ZFIN;Acc:ZDB-GENE-030616-592]	Homeobox
ENSDARG00000114661	0	0	0	0	0	0.510033	0.679071	0.0894792	BX321875.4	3	1689220	1714615	+	3035	protein_coding	-	-
ENSDARG00000105408	3.94635	1.56033	1.84793	2.7525	6.73939	3.79813	10.9652	9.32872	BX248082.1	16	16055484	16059808	+	1834	antisense	-	-
ENSDARG00000040278	3.52906	2.24618	2.82428	8.68943	10.2599	21.2836	6.59451	48.7865	klhl38b	16	25245857	25250414	+	2093	protein_coding	kelch-like family member 38b [Source:ZFIN;Acc:ZDB-GENE-120727-8]	BTB
ENSDARG00000001313	0.324583	0.223058	0.211115	0.246971	2.21086	0.946993	2.02603	0.161649	g2e3	17	28798725	28811747	-	3360	protein_coding	G2/M-phase specific E3 ubiquitin protein ligase [Source:ZFIN;Acc:ZDB-GENE-030616-400]	HECT
ENSDARG00000103466	2.3459	1.44244	1.86489	2.32516	4.04243	3.85542	7.85535	6.25658	ccl35.1	25	13048201	13050959	-	803	protein_coding	chemokine (C-C motif) ligand 35, duplicate 1 [Source:ZFIN;Acc:ZDB-GENE-081022-33]	-
ENSDARG00000103146	1.30676	1.41946	1.37392	1.05845	2.12328	2.3035	4.8593	4.04121	nlrc3	24	37449893	37466754	+	2352	protein_coding	NLR family, CARD domain containing 3 [Source:ZFIN;Acc:ZDB-GENE-071119-1]	-
ENSDARG00000097592	3.7778	3.38105	3.28256	4.22817	8.49105	7.84911	9.68492	4.69261	si:dkey-40c23.1	11	1575435	1582456	+	2257	protein_coding	si:dkey-40c23.1 [Source:ZFIN;Acc:ZDB-GENE-131119-61]	-
ENSDARG00000021572	3.06105	16.866	4.47917	3.40092	60.2413	30.4045	63.3412	7.19733	mb21d1	13	27328098	27332360	+	1830	protein_coding	Mab-21 domain containing 1 [Source:ZFIN;Acc:ZDB-GENE-090313-23]	-
ENSDARG00000011166	168.351	96.0767	43.5769	188.177	53.9992	34.1928	38.0451	35.9451	cahz	2	29477383	29485408	-	1919	protein_coding	carbonic anhydrase [Source:ZFIN;Acc:ZDB-GENE-980526-39]	-
ENSDARG00000014098	2.55591	2.65511	1.98458	2.50821	0.299398	1.16003	0.224654	0.976869	pkd2	1	50538839	50557030	+	3336	protein_coding	polycystic kidney disease 2 [Source:ZFIN;Acc:ZDB-GENE-040827-4]	-
ENSDARG00000012019	0.53644	0.51999	0.502758	0.425357	0.0924385	0.274282	0.156508	0.216538	glra1	14	25816874	25911567	+	8779	protein_coding	glycine receptor, alpha 1 [Source:ZFIN;Acc:ZDB-GENE-991117-1]	Neur_chan_LBD
ENSDARG00000055965	0.628776	1.79755	1.3196	1.08763	0.253372	0.305419	0.285178	0.482239	klc3	15	23657051	23677446	+	1971	protein_coding	kinesin light chain 3 [Source:ZFIN;Acc:ZDB-GENE-060929-772]	-
ENSDARG00000069917	0.11469	0.254639	0.140267	0.221523	0.899871	0.489751	1.18928	0.265818	ska3	9	21259657	21269186	+	5619	protein_coding	spindle and kinetochore associated complex subunit 3 [Source:ZFIN;Acc:ZDB-GENE-030131-2997]	-
ENSDARG00000077559	1.94569	1.86032	0.537995	0.472027	15.18	7.1909	11.084	0.579286	LO017815.1	16	55059026	55074006	+	1172	protein_coding	Danio rerio nuclear receptor coactivator 7-like (LOC792958), mRNA. [Source:RefSeq mRNA;Acc:NM_001326597]	-
ENSDARG00000101131	2.02076	0.773453	0.36602	2.31934	0.354318	0.0887484	0.225582	0	pbx1b	6	2271559	2395013	+	1938	protein_coding	pre-B-cell leukemia homeobox 1b [Source:ZFIN;Acc:ZDB-GENE-070424-11]	PBC
ENSDARG00000040536	5.98628	2.85013	1.43076	9.33306	1.33028	0.882371	0.246464	1.28604	CR853294.1	15	41711727	41714329	-	1267	protein_coding	-	zf-B_box
ENSDARG00000075521	0.141563	0.26532	0.3683	0.269283	0	0.066976	0.0162134	0	cpz	1	40801448	40818900	+	3852	protein_coding	carboxypeptidase Z [Source:ZFIN;Acc:ZDB-GENE-090313-267]	Fz
ENSDARG00000074508	1.17421	0.637741	1.20445	1.06997	0.190791	0.295693	0.167021	0.622509	si:dkey-28e7.3	11	11595973	11625630	-	5235	protein_coding	si:dkey-28e7.3 [Source:ZFIN;Acc:ZDB-GENE-141215-28]	-
ENSDARG00000074425	45.016	89.0562	96.9679	69.5012	40.8596	35.7019	35.0751	27.157	si:busm1-57f23.1	10	13236100	13239367	-	990	protein_coding	si:busm1-57f23.1 [Source:ZFIN;Acc:ZDB-GENE-030616-512]	-
ENSDARG00000015149	1.60353	1.96205	1.74111	1.4185	3.0535	3.32455	5.64179	3.05315	wasa	8	25629722	25643932	+	2535	protein_coding	Wiskott-Aldrich syndrome (eczema-thrombocytopenia) a [Source:ZFIN;Acc:ZDB-GENE-081104-419]	PBD
ENSDARG00000025299	0.354091	0.827344	0.675568	1.97577	0	0	0.13383	0.193978	tspan9a	18	11016203	11317187	-	1400	protein_coding	tetraspanin 9a [Source:ZFIN;Acc:ZDB-GENE-060503-632]	Tetraspannin
ENSDARG00000011259	0.032003	0.0769754	0.228969	0.0558037	0	0	0	0	trpm1a	7	29312376	29341364	-	6196	protein_coding	transient receptor potential cation channel, subfamily M, member 1a [Source:ZFIN;Acc:ZDB-GENE-070112-1372]	Ion_trans
ENSDARG00000076657	2.6717	0.804102	0.837151	1.74104	0.491144	0.473628	0.343963	0.16025	plagl2	23	7592009	7674902	-	2542	protein_coding	pleiomorphic adenoma gene-like 2 [Source:ZFIN;Acc:ZDB-GENE-020806-1]	-
ENSDARG00000041569	1.60175	2.2388	1.85602	1.09825	1.91444	6.40505	4.82256	15.0211	ces2	18	17408470	17415609	-	1826	protein_coding	carboxylesterase 2 (intestine, liver) [Source:ZFIN;Acc:ZDB-GENE-061013-99]	COesterase
ENSDARG00000043542	1.66878	2.32736	2.22402	1.09548	0.123613	0.340583	0.309178	1.0083	zpr1	10	29820172	29831944	-	2020	protein_coding	ZPR1 zinc finger [Source:ZFIN;Acc:ZDB-GENE-040426-2110]	-
ENSDARG00000018687	3.16843	3.28423	5.03752	4.7329	0.947588	1.53444	1.06446	2.63976	itga2b	3	21350509	21382491	-	3755	protein_coding	integrin, alpha 2b [Source:ZFIN;Acc:ZDB-GENE-051031-1]	FG-GAP
ENSDARG00000101653	0.0485626	0	0.0926523	0.0270972	0.25684	0.219037	0.318143	0.212829	zgc:110171	4	76060322	76183357	-	5104	protein_coding	zgc:110171 [Source:ZFIN;Acc:ZDB-GENE-050417-391]	NACHT
ENSDARG00000045561	4.19611	4.02367	3.33573	2.92671	15.2375	5.84036	20.3467	5.61315	dram1	4	17662413	17669881	-	1016	protein_coding	DNA-damage regulated autophagy modulator 1 [Source:ZFIN;Acc:ZDB-GENE-041010-147]	-
ENSDARG00000026871	6.74419	5.90232	7.69833	9.64911	4.42778	3.99987	3.26794	2.84201	uchl1	1	22647756	22652424	-	1720	protein_coding	ubiquitin carboxyl-terminal esterase L1 (ubiquitin thiolesterase) [Source:ZFIN;Acc:ZDB-GENE-030131-3844]	-
ENSDARG00000058348	153.358	224.806	204.461	163.917	119.599	84.8024	93.2813	53.9167	scinlb	2	10396579	10450784	-	2735	protein_coding	scinderin like b [Source:ZFIN;Acc:ZDB-GENE-040426-2068]	-
ENSDARG00000071555	9.46684	11.7296	13.7168	5.59461	2.46644	3.64052	3.93642	5.4927	zgc:153675	22	812848	817479	-	1063	protein_coding	zgc:153675 [Source:ZFIN;Acc:ZDB-GENE-061013-567]	-
ENSDARG00000022350	1.42682	1.18166	1.57051	1.68414	0.829254	0.698133	0.737463	0.776629	nek1	20	23670494	23714017	+	5420	protein_coding	NIMA-related kinase 1 [Source:ZFIN;Acc:ZDB-GENE-040730-1]	Pkinase
ENSDARG00000096229	0	0.0911291	0.105416	0.154151	0.612277	0.306722	1.11376	0.484297	si:dkey-260c8.8	3	37790351	37806283	+	2243	protein_coding	si:dkey-260c8.8 [Source:ZFIN;Acc:ZDB-GENE-030131-5375]	-
ENSDARG00000042940	0.276428	0.538235	0.732493	0.706944	1.30534	1.79827	2.26366	1.26194	nab1a	22	12870275	12890921	-	2152	protein_coding	NGFI-A binding protein 1a (EGR1 binding protein 1) [Source:ZFIN;Acc:ZDB-GENE-050208-574]	-
ENSDARG00000003449	1.2492	1.97774	1.68443	3.63958	0.696923	0.795509	0.816782	0.779625	pde10a	13	4505079	4620715	+	3135	protein_coding	phosphodiesterase 10A [Source:ZFIN;Acc:ZDB-GENE-040426-1115]	GAF
ENSDARG00000075954	3.89009	7.71701	8.86502	3.11121	1.66552	2.45192	2.05838	2.5928	serpinh1a	10	38512270	38521710	+	3823	protein_coding	serpin peptidase inhibitor, clade H (heat shock protein 47), member 1a [Source:ZFIN;Acc:ZDB-GENE-080219-21]	Serpin
ENSDARG00000103195	2.78469	2.67193	3.21614	4.47087	0.992439	1.41278	1.42317	1.87091	dync1i2b	6	3934738	3956580	+	1887	protein_coding	dynein, cytoplasmic 1, intermediate chain 2b [Source:ZFIN;Acc:ZDB-GENE-090121-1]	-
ENSDARG00000090833	3.91266	10.451	11.7373	6.0759	0.836664	3.90606	0.651046	2.02211	igfbp6b	23	36601984	36605837	+	1343	protein_coding	insulin-like growth factor binding protein 6b [Source:ZFIN;Acc:ZDB-GENE-090521-2]	-
ENSDARG00000014866	13.8127	11.3995	8.21637	22.6947	7.95369	4.31646	4.54137	3.66986	hprt1l	25	37073189	37084032	-	1554	protein_coding	hypoxanthine phosphoribosyltransferase 1, like [Source:ZFIN;Acc:ZDB-GENE-040625-17]	Pribosyltran
ENSDARG00000097011	3459.2	1227.99	1071.83	6765.31	989.873	685.6	804.034	774.661	hbaa1	3	55100045	55100936	+	651	protein_coding	hemoglobin, alpha adult 1 [Source:ZFIN;Acc:ZDB-GENE-980526-79]	-
ENSDARG00000013477	1.77383	0.130027	0.451238	0.329923	0.0595653	0.0820584	0.0297967	0	gata1a	11	25411914	25418856	-	2096	protein_coding	GATA binding protein 1a [Source:ZFIN;Acc:ZDB-GENE-980526-268]	GATA
ENSDARG00000039863	2.45409	2.31049	1.69728	1.35223	4.43461	4.12957	6.21447	2.9913	lifrb	21	21244046	21261636	+	4040	protein_coding	leukemia inhibitory factor receptor alpha b [Source:ZFIN;Acc:ZDB-GENE-080107-2]	-
ENSDARG00000040295	181.399	204.596	190.262	161.474	120.07	84.1684	119.949	71.8709	apoeb	16	23960744	23963461	+	2116	protein_coding	apolipoprotein Eb [Source:ZFIN;Acc:ZDB-GENE-980526-368]	-
ENSDARG00000017794	3.20307	2.92121	3.28401	3.13188	1.09318	1.92144	1.0937	1.63991	sdr16c5b	7	58699718	58718472	+	1656	protein_coding	short chain dehydrogenase/reductase family 16C, member 5b [Source:ZFIN;Acc:ZDB-GENE-040426-2861]	adh_short
ENSDARG00000093748	23.4981	51.3485	14.9112	15.7425	170.207	92.3442	139.32	27.5239	si:ch211-217k17.11	1	52441080	52443379	-	962	protein_coding	si:ch211-217k17.11 [Source:ZFIN;Acc:ZDB-GENE-030131-8636]	-
ENSDARG00000073978	22.2163	28.0739	34.4955	40.1753	20.5091	13.8264	12.5635	9.59721	crabp2a	16	14383479	14397003	-	2575	protein_coding	cellular retinoic acid binding protein 2, a [Source:ZFIN;Acc:ZDB-GENE-020320-4]	-
ENSDARG00000100019	0.31575	0.881951	0.534402	0.497292	2.83456	1.16618	3.04121	0.809073	arhgap11a	17	92784	114121	-	4867	protein_coding	Rho GTPase activating protein 11A [Source:ZFIN;Acc:ZDB-GENE-040426-2562]	RhoGAP
ENSDARG00000020788	0.813451	0.789199	0.722736	1.10136	2.56085	1.28664	5.36525	2.03153	sla2	23	14808221	14830627	-	2072	protein_coding	Src-like-adaptor 2 [Source:ZFIN;Acc:ZDB-GENE-080204-98]	SH2
ENSDARG00000009779	156.634	185.157	189.797	182.082	249.21	265.255	286.871	333.824	mcl1a	19	348729	353231	+	1409	protein_coding	MCL1, BCL2 family apoptosis regulator a [Source:ZFIN;Acc:ZDB-GENE-000511-7]	-
ENSDARG00000055120	94.9308	95.5485	84.0906	68.9773	178.551	129.068	198.402	128.127	ctsba	17	32622931	32631514	+	2376	protein_coding	cathepsin Ba [Source:ZFIN;Acc:ZDB-GENE-040426-2650]	Peptidase_C1
ENSDARG00000043089	0.273301	0.0288949	0.20055	0.146633	2.93855	0.656468	2.56914	0.0575847	alox5b.2	15	963292	976353	+	2358	protein_coding	arachidonate 5-lipoxygenase b, tandem duplicate 2 [Source:ZFIN;Acc:ZDB-GENE-060623-19]	Lipoxygenase
ENSDARG00000105255	1.55629	0.782006	1.06425	1.08159	0.477648	0.329009	0.330295	0.702835	zbtb4	12	22528750	22540943	-	8887	protein_coding	zinc finger and BTB domain containing 4 [Source:ZFIN;Acc:ZDB-GENE-100318-5]	-
ENSDARG00000029480	1.50355	1.31665	1.60376	1.18587	0.950666	0.539271	0.639405	0.625576	specc1	5	62804252	62988463	-	7814	protein_coding	sperm antigen with calponin homology and coiled-coil domains 1 [Source:ZFIN;Acc:ZDB-GENE-060526-207]	CH
ENSDARG00000061169	1.30834	1.20322	1.52952	1.87876	0.944907	0.383842	0.545396	0.500662	larp1b	17	26753967	26802816	+	5153	protein_coding	La ribonucleoprotein domain family, member 1B [Source:ZFIN;Acc:ZDB-GENE-030131-4154]	-
ENSDARG00000058349	0	1.28072	6.07418	2.33973	0.117339	0	0	0	polr2l	7	13363898	13371484	-	532	protein_coding	polymerase (RNA) II (DNA directed) polypeptide L [Source:ZFIN;Acc:ZDB-GENE-050522-181]	-
ENSDARG00000098849	1.31318	2.70732	3.47975	4.04531	0.344506	0.854277	0.827204	1.04911	SLC25A29	17	706630	722218	-	906	protein_coding	solute carrier family 25 member 29 [Source:HGNC Symbol;Acc:HGNC:20116]	Mito_carr
ENSDARG00000101030	5.56775	4.42909	7.17288	3.09673	23.7389	11.6464	23.908	5.73738	si:ch73-158p21.3	4	76362874	76370661	-	2769	protein_coding	si:ch73-158p21.3 [Source:ZFIN;Acc:ZDB-GENE-030131-4747]	C1-set
ENSDARG00000074851	1.09105	0.692108	1.20092	1.95124	0.352282	0.339718	0.246714	0.459768	s1pr4	22	5320415	5323482	-	1772	protein_coding	sphingosine-1-phosphate receptor 4 [Source:ZFIN;Acc:ZDB-GENE-050506-8]	7tm_1
ENSDARG00000024771	0.841473	0.136064	0.314793	0.172621	0.0311655	0	0	0	slc24a5	18	5213338	5227420	+	2003	protein_coding	solute carrier family 24 (sodium/potassium/calcium exchanger), member 5 [Source:ZFIN;Acc:ZDB-GENE-031210-1]	Na_Ca_ex
ENSDARG00000092660	1.11505	1.8183	0.8113	1.55546	0.404581	0.327858	0.523822	0.621204	cyp27c1	6	9568149	9581949	-	2623	protein_coding	cytochrome P450, family 27, subfamily C, polypeptide 1 [Source:ZFIN;Acc:ZDB-GENE-080204-68]	p450
ENSDARG00000099389	40.1836	28.1459	22.2995	17.9482	11.2393	15.0814	8.4213	13.0176	cdo1	KN149707.2	4029	7435	+	1283	protein_coding	cysteine dioxygenase, type I [Source:ZFIN;Acc:ZDB-GENE-040426-1704]	-
ENSDARG00000099572	165.229	232.998	173.334	122.731	621.442	366.47	729.531	203.677	hmgn2	16	51180938	51184126	+	1270	protein_coding	high mobility group nucleosomal binding domain 2 [Source:ZFIN;Acc:ZDB-GENE-051030-81]	-
ENSDARG00000101050	0.795157	0.766653	1.00006	1.25821	1.59909	1.62647	2.94552	2.79566	tmc8	11	45199369	45216684	-	4177	protein_coding	transmembrane channel-like 8 [Source:ZFIN;Acc:ZDB-GENE-081114-2]	-
ENSDARG00000098438	18.8232	15.7992	16.9512	18.3603	11.7249	8.47509	9.05129	11.8074	slc6a6b	22	31493953	31517300	-	1725	protein_coding	solute carrier family 6 (neurotransmitter transporter), member 6b [Source:ZFIN;Acc:ZDB-GENE-030131-3077]	SNF
ENSDARG00000077826	0.473248	0.758854	1.19134	0.247561	0.0248307	0.0684147	0.0496849	0.270057	efcc1	11	26619133	26666627	-	2514	protein_coding	EF-hand and coiled-coil domain containing 1 [Source:ZFIN;Acc:ZDB-GENE-120813-3]	-
ENSDARG00000063385	0.398033	0.884964	0.67937	0.318447	3.54542	1.76686	3.03826	0.529094	cenpe	1	260039	296057	+	8469	protein_coding	centromere protein E [Source:ZFIN;Acc:ZDB-GENE-060929-860]	Kinesin
ENSDARG00000029668	1.98	1.31075	1.24188	1.22897	0.663359	0.787809	0.514919	0.746343	crim1	17	38927889	39185336	-	5458	protein_coding	cysteine rich transmembrane BMP regulator 1 (chordin-like) [Source:ZFIN;Acc:ZDB-GENE-040312-2]	VWC
ENSDARG00000102048	3.6144	3.58983	5.15934	4.15869	6.71087	16.1102	6.21548	12.574	slc25a43	14	32884731	32893785	-	1879	protein_coding	solute carrier family 25, member 43 [Source:ZFIN;Acc:ZDB-GENE-030616-69]	Mito_carr
ENSDARG00000021794	0.643412	0.308486	0.64233	0.166983	3.91919	1.32383	3.84564	0.368869	hmmr	14	28545198	28562971	+	3313	protein_coding	hyaluronan-mediated motility receptor (RHAMM) [Source:ZFIN;Acc:ZDB-GENE-030131-731]	-
ENSDARG00000097533	0.818932	0.787896	0.564213	0.799665	1.64998	1.32595	2.40736	2.0936	BX571880.1	15	36141669	36146007	+	1816	lincRNA	-	-
ENSDARG00000061725	0.62782	0.3279	0.339381	0.24522	0.869641	0.980212	1.0757	1.20377	mast3a	2	24638367	24683365	+	3948	protein_coding	microtubule associated serine/threonine kinase 3a [Source:ZFIN;Acc:ZDB-GENE-040914-35]	Pkinase
ENSDARG00000096725	5.66989	5.49971	5.5077	5.83827	7.58494	10.5473	10.1537	15.7628	si:dkey-21c1.1	12	34844927	34852342	-	3506	protein_coding	si:dkey-21c1.1 [Source:ZFIN;Acc:ZDB-GENE-130603-45]	-
ENSDARG00000069453	2.08896	6.58888	2.46966	1.98004	17.0647	11.6614	16.8703	3.81459	zgc:113314	9	30421489	30427117	+	1851	protein_coding	zgc:113314 [Source:ZFIN;Acc:ZDB-GENE-050913-19]	-
ENSDARG00000036282	3.14283	3.61641	1.36541	1.83522	5.85588	5.97511	13.9042	4.47945	rnaset2	13	7049210	7065999	+	5426	protein_coding	ribonuclease T2 [Source:ZFIN;Acc:ZDB-GENE-030131-2513]	Ribonuclease_T2
ENSDARG00000016188	11.4847	11.498	9.58886	12.8867	23.013	14.8282	19.7743	20.9032	si:ch73-63e15.2	22	17691381	17781213	-	7899	protein_coding	si:ch73-63e15.2 [Source:ZFIN;Acc:ZDB-GENE-091204-463]	-
ENSDARG00000073718	0.597261	0.931826	0.795605	0.878192	1.52453	1.51216	1.72862	1.90125	si:ch73-233k15.2	3	29674308	29688399	-	3071	protein_coding	si:ch73-233k15.2 [Source:ZFIN;Acc:ZDB-GENE-120215-22]	-
ENSDARG00000069734	780.426	232.18	63.4168	523.108	123.504	88.3787	97.6203	48.4647	hbba2	3	55091230	55092051	-	650	protein_coding	hemoglobin, beta adult 2 [Source:ZFIN;Acc:ZDB-GENE-040801-164]	-
ENSDARG00000053804	2.95573	2.5611	2.75831	5.73652	0.768674	1.33761	1.61903	1.32001	osbpl2a	23	30937757	30960506	-	1543	protein_coding	oxysterol binding protein-like 2a [Source:ZFIN;Acc:ZDB-GENE-091116-46]	-
ENSDARG00000055955	3.63661	3.71581	1.8639	1.86897	7.56203	5.14655	13.5035	5.24265	lcp2a	21	30306369	30347592	+	2072	protein_coding	lymphocyte cytosolic protein 2a [Source:ZFIN;Acc:ZDB-GENE-041114-97]	SH2
ENSDARG00000061362	0	0.135276	0	0.228828	0.908893	0.626055	0.909322	0.539185	fam69ab	6	29102942	29143463	-	1511	protein_coding	family with sequence similarity 69, member Ab [Source:ZFIN;Acc:ZDB-GENE-131126-27]	-
ENSDARG00000100436	0.264388	0.181691	0.294247	0.147524	0.466102	0.825574	1.49889	0.869022	cnga2	5	23035645	23043974	+	1875	protein_coding	cyclic nucleotide gated channel alpha 2 [Source:ZFIN;Acc:ZDB-GENE-050307-2]	Ion_trans
ENSDARG00000068876	0.384533	0.484471	1.09538	1.67628	0.181584	0.111179	0.322968	0.0438865	zgc:153031	18	15132112	15141119	+	3094	protein_coding	zgc:153031 [Source:ZFIN;Acc:ZDB-GENE-060929-1190]	-
ENSDARG00000070230	1.43479	1.99417	2.30682	1.61917	1.05563	0.671198	0.284343	0.309104	aldh1l2	4	9028819	9048975	+	3075	protein_coding	aldehyde dehydrogenase 1 family, member L2 [Source:ZFIN;Acc:ZDB-GENE-100426-6]	Aldedh
ENSDARG00000004305	1.45279	0.733502	0.377111	0.951253	0.298681	0.102868	0.0747056	0.081211	vangl1	9	33009284	33055440	+	1672	protein_coding	VANGL planar cell polarity protein 1 [Source:ZFIN;Acc:ZDB-GENE-040621-2]	-
ENSDARG00000012881	58.7316	23.9313	11.5919	43.6964	16.0976	9.21399	9.97577	6.41503	slc4a1a	3	20065861	20092124	-	3556	protein_coding	solute carrier family 4 (anion exchanger), member 1a (Diego blood group) [Source:ZFIN;Acc:ZDB-GENE-010525-1]	Band_3_cyto
ENSDARG00000097491	1.93442	3.33227	4.4288	3.81379	0.941888	1.47654	0.389931	1.55425	ugt1b1	11	30321116	30329055	+	1922	protein_coding	UDP glucuronosyltransferase 1 family, polypeptide B1 [Source:ZFIN;Acc:ZDB-GENE-080227-10]	UDPGT
ENSDARG00000013110	3.2343	1.45433	0.95227	3.48127	0.678799	0.658054	0.57851	0.929658	dmtn	10	20108557	20146544	+	2483	protein_coding	dematin actin binding protein [Source:ZFIN;Acc:ZDB-GENE-030131-9438]	-
ENSDARG00000026165	0.566626	0.593826	0.41666	0.938625	0.249733	0.147445	0.312314	0.097003	col11a1a	24	28764021	28893303	-	6999	protein_coding	collagen, type XI, alpha 1a [Source:ZFIN;Acc:ZDB-GENE-070209-167]	Collagen
ENSDARG00000104718	0.849376	0.106128	0	0.215427	5.05618	1.07162	4.47489	1.05751	CU570769.3	22	1158069	1159749	-	642	processed_transcript	-	-
ENSDARG00000058839	4.56441	2.79341	2.07601	6.47805	1.57276	1.39849	1.5449	1.74163	susd1	5	9246018	9278521	+	4366	protein_coding	sushi domain containing 1 [Source:ZFIN;Acc:ZDB-GENE-060526-169]	EGF_CA
ENSDARG00000093600	1.27861	5.08901	4.36221	3.41858	0.737956	1.10905	0.906102	1.67816	omd	22	10463890	10470663	-	1861	protein_coding	osteomodulin [Source:ZFIN;Acc:ZDB-GENE-060503-756]	-
ENSDARG00000018653	12.6628	13.7944	12.4525	16.094	30.1787	25.4656	19.1439	23.1232	acot7	8	46758264	46894362	-	1057	protein_coding	acyl-CoA thioesterase 7 [Source:ZFIN;Acc:ZDB-GENE-040912-42]	4HBT
ENSDARG00000039958	2.08251	2.24003	2.37528	2.58925	5.58684	3.61267	10.3234	4.58816	utp11l	16	33645721	33650578	-	1095	protein_coding	UTP11-like, U3 small nucleolar ribonucleoprotein (yeast) [Source:ZFIN;Acc:ZDB-GENE-030131-8093]	-
ENSDARG00000094012	1.11578	1.09541	1.09819	0.667061	1.94031	1.88954	2.54367	2.76518	si:dkey-192g7.3	9	35077546	35081981	+	1866	protein_coding	si:dkey-192g7.3 [Source:ZFIN;Acc:ZDB-GENE-070912-411]	V-set
ENSDARG00000024276	0.575743	0.452182	0.616482	0.508109	0.0591841	0.285367	0.133227	0.160921	pcbp4	22	32289567	32507966	-	4219	protein_coding	poly(rC) binding protein 4 [Source:ZFIN;Acc:ZDB-GENE-040426-2122]	KH_1
ENSDARG00000104023	3.33441	3.46156	4.17345	3.01844	0.647695	2.06147	0.849105	1.74893	mag	15	33891808	33933820	-	2795	protein_coding	myelin associated glycoprotein [Source:ZFIN;Acc:ZDB-GENE-041217-24]	V-set
ENSDARG00000027584	2.37165	1.91329	2.99198	2.15763	3.70067	6.75277	4.02719	11.7214	ttpa	2	26647472	26653148	+	1923	protein_coding	tocopherol (alpha) transfer protein [Source:ZFIN;Acc:ZDB-GENE-030131-4631]	-
ENSDARG00000100339	3.73429	4.81174	3.85918	3.12551	1.52828	2.34832	1.4702	1.15072	arf4b	11	42466834	42472941	-	1062	protein_coding	ADP-ribosylation factor 4b [Source:ZFIN;Acc:ZDB-GENE-050417-205]	Arf
ENSDARG00000030110	3.7767	5.84447	6.62733	11.7855	7.50361	25.1877	12.9349	114.712	myod1	25	31421253	31423493	-	1772	protein_coding	myogenic differentiation 1 [Source:ZFIN;Acc:ZDB-GENE-980526-561]	Basic
ENSDARG00000098408	1.60737	1.80754	2.41037	4.91759	0.598023	0.285179	0.437223	1.50094	stbd1	21	5589923	5603828	+	2714	protein_coding	starch binding domain 1 [Source:ZFIN;Acc:ZDB-GENE-120817-2]	-
ENSDARG00000053326	2.76907	1.91726	1.98613	2.06207	0.734096	0.975189	1.33774	0.684341	gna11b	2	52469854	52550135	-	2381	protein_coding	guanine nucleotide binding protein (G protein), alpha 11b (Gq class) [Source:ZFIN;Acc:ZDB-GENE-041121-9]	G-alpha
ENSDARG00000018643	3.41553	4.23801	2.7152	2.58079	1.07525	1.19326	1.76305	1.81913	igf2a	7	48870496	48876480	+	2090	protein_coding	insulin-like growth factor 2a [Source:ZFIN;Acc:ZDB-GENE-991111-3]	-
ENSDARG00000095820	2.78411	4.14545	3.31987	1.29458	7.01179	2.14658	24.7477	25.8436	BX649485.4	22	11097512	11098318	+	641	lincRNA	-	-
ENSDARG00000024548	0.164602	0.226234	0.392555	0	1.03638	0.618685	1.48618	0.901725	cryba4	10	44042033	44051808	+	1807	protein_coding	crystallin, beta A4 [Source:ZFIN;Acc:ZDB-GENE-050522-143]	Crystall
ENSDARG00000109561	2.2792	1.5663	3.01978	3.7093	8.84944	11.5322	12.2036	3.64174	CABZ01027551.1	16	46807214	46808014	+	261	protein_coding	-	-
ENSDARG00000040277	12.3932	16.4319	22.9663	52.7799	50.7112	114.9	34.8804	329.87	fbxo32	16	25259313	25272633	+	1812	protein_coding	F-box protein 32 [Source:ZFIN;Acc:ZDB-GENE-040426-1040]	-
ENSDARG00000030106	1.27161	1.08194	1.70084	0.506814	0.152503	0.315136	0.330579	0.497583	stmn4	20	34773646	34868814	-	2456	protein_coding	stathmin-like 4 [Source:ZFIN;Acc:ZDB-GENE-040426-2732]	-
ENSDARG00000053761	1.05339	0.0868689	0.267969	0.382055	4.58964	2.04668	3.66283	0.519364	si:dkey-187j14.4	7	2228276	2234151	+	2353	protein_coding	si:dkey-187j14.4 [Source:ZFIN;Acc:ZDB-GENE-131119-26]	-
ENSDARG00000090309	11.5745	19.0722	16.4952	13.161	38.4998	23.96	34.27	23.2672	ubxn1	14	45471642	45482605	+	1529	protein_coding	UBX domain protein 1 [Source:ZFIN;Acc:ZDB-GENE-030131-792]	UBX
ENSDARG00000018856	0.41768	0.459258	0.53126	0.482765	0.225413	0.165618	0.105243	0.0653754	dclk1a	10	34737322	34871737	-	4154	protein_coding	doublecortin-like kinase 1a [Source:ZFIN;Acc:ZDB-GENE-061013-124]	Pkinase
ENSDARG00000030053	99.502	120.023	138.921	110.586	190.898	191.616	184.441	315.529	eef1db	20	52546186	52582645	+	1946	protein_coding	eukaryotic translation elongation factor 1 delta b (guanine nucleotide exchange protein) [Source:ZFIN;Acc:ZDB-GENE-030131-6544]	-
ENSDARG00000015025	0.22037	0.259614	0.483842	0.204938	0.0396429	0.0728173	0.0661028	0.0862308	l1camb	23	597082	637347	-	4724	protein_coding	L1 cell adhesion molecule, paralog b [Source:ZFIN;Acc:ZDB-GENE-980526-512]	fn3
ENSDARG00000002194	5.73924	3.31961	2.12914	7.70579	1.98746	1.49344	1.80764	0.85152	rhd	13	45496766	45523026	-	2073	protein_coding	Rh blood group, D antigen [Source:ZFIN;Acc:ZDB-GENE-051213-1]	Ammonium_transp
ENSDARG00000090900	3.97671	14.4879	15.7632	11.1707	4.25309	3.63835	5.07867	3.2081	apnl	3	31249885	31254979	-	1820	protein_coding	actinoporin-like protein [Source:ZFIN;Acc:ZDB-GENE-030131-8907]	-
ENSDARG00000021547	0.906928	1.17172	1.21123	1.26513	2.42114	2.07677	3.06214	1.7886	vrk2	13	26780004	26799244	-	2733	protein_coding	vaccinia related kinase 2 [Source:ZFIN;Acc:ZDB-GENE-040426-1046]	Pkinase
ENSDARG00000027161	0	0	0	0	0.499395	0.229326	29.3117	2.89674	igl3v2	24	39700552	39701027	-	375	protein_coding	immunoglobulin light 3 variable 2 [Source:ZFIN;Acc:ZDB-GENE-060503-410]	V-set
ENSDARG00000076548	0.818256	0.749757	0.758891	1.42679	2.06078	2.60239	2.92082	4.2958	si:dkey-266m15.5	18	6785640	6803424	-	727	protein_coding	si:dkey-266m15.5 [Source:ZFIN;Acc:ZDB-GENE-070705-442]	-
ENSDARG00000099129	5.21063	14.5204	15.4288	8.80237	21.7312	32.9228	20.1756	51.7213	phlda1	4	2349335	2350371	-	1037	protein_coding	pleckstrin homology-like domain, family A, member 1 [Source:ZFIN;Acc:ZDB-GENE-041010-103]	-
ENSDARG00000078929	12.8834	13.5704	10.9125	12.7235	17.171	19.2248	26.1134	29.7927	abhd16a	16	10477533	10516970	-	2174	protein_coding	abhydrolase domain containing 16A [Source:ZFIN;Acc:ZDB-GENE-010601-2]	Abhydrolase_1
ENSDARG00000000503	0.544595	0.439125	0.634963	0.293746	0.164588	0.251933	0.109777	0.0596681	stx1b	19	5158306	5254699	-	6827	protein_coding	syntaxin 1B [Source:ZFIN;Acc:ZDB-GENE-000330-4]	SNARE
ENSDARG00000031293	1.15959	0.0498057	0.115228	0.657146	0	0	0	0	dnajc9	12	9497646	9510403	+	1368	protein_coding	DnaJ (Hsp40) homolog, subfamily C, member 9 [Source:ZFIN;Acc:ZDB-GENE-040718-130]	DnaJ
ENSDARG00000020289	0.0120234	0.0991524	0	0.067089	0.529919	0.50059	0.666498	0.0329335	pif1	2	17096161	17115256	-	4123	protein_coding	PIF1 5'-to-3' DNA helicase homolog (S. cerevisiae) [Source:ZFIN;Acc:ZDB-GENE-030131-4928]	-
ENSDARG00000038794	3.23975	2.92788	2.61074	1.73344	1.39714	0.769895	0.335473	0.486248	zgc:113531	2	33457310	33466371	+	1117	protein_coding	zgc:113531 [Source:ZFIN;Acc:ZDB-GENE-050320-52]	VWC
ENSDARG00000052057	2.05917	3.3543	2.09166	4.3087	1.32052	0.661517	1.29712	1.35785	pcolceb	7	50849142	50873496	+	2600	protein_coding	procollagen C-endopeptidase enhancer b [Source:ZFIN;Acc:ZDB-GENE-080722-44]	CUB
ENSDARG00000033735	4.22983	3.44983	2.84522	3.0799	8.22375	4.67683	9.66235	6.17493	ncf1	5	61432541	61445697	-	2133	protein_coding	neutrophil cytosolic factor 1 [Source:ZFIN;Acc:ZDB-GENE-031006-6]	PX
ENSDARG00000042151	11.492	13.0128	12.5911	13.9496	8.04297	9.21949	7.01044	8.50449	skia	8	17395929	17516448	-	6147	protein_coding	v-ski avian sarcoma viral oncogene homolog a [Source:ZFIN;Acc:ZDB-GENE-990715-9]	-
ENSDARG00000005716	1.0094	1.15612	1.63458	1.09517	0.235386	0.421555	0.353246	0.768013	olfml2ba	20	33792156	33806508	+	2652	protein_coding	olfactomedin-like 2Ba [Source:ZFIN;Acc:ZDB-GENE-041014-329]	-
ENSDARG00000088362	0	0.117473	0	0.178841	0.672677	0.481881	1.61519	0.234112	CR925817.1	11	7095176	7103536	+	2320	lincRNA	-	-
ENSDARG00000002509	19.8526	21.0111	24.4457	37.7603	13.0561	15.1249	13.2107	10.7305	zgc:153911	13	35974362	35976986	-	1683	protein_coding	zgc:153911 [Source:ZFIN;Acc:ZDB-GENE-061013-174]	V-set
ENSDARG00000011693	1.01298	2.52349	2.91912	0.971484	0.318899	0.219661	0.558336	0	ttc36	18	42781622	42830563	-	783	protein_coding	tetratricopeptide repeat domain 36 [Source:ZFIN;Acc:ZDB-GENE-041114-87]	-
ENSDARG00000045675	0.689089	0.430503	0.398397	0.52432	1.78806	1.26786	1.3943	0.857949	mdm1	4	13551400	13567516	-	2374	protein_coding	Mdm1 nuclear protein homolog (mouse) [Source:ZFIN;Acc:ZDB-GENE-041210-117]	-
ENSDARG00000070710	2.36985	0.961141	1.85305	6.50332	0.782751	0.269584	0.734176	0	prss60.3	6	39108858	39112234	+	1276	protein_coding	protease, serine, 60.3 [Source:ZFIN;Acc:ZDB-GENE-030131-7092]	Trypsin
ENSDARG00000039096	0.0434086	0.0596622	0.161037	0.18166	0.491961	0.326318	0.60157	0.396336	si:dkey-24p1.1	15	38101135	38129845	-	3426	protein_coding	si:dkey-24p1.1 [Source:ZFIN;Acc:ZDB-GENE-060503-631]	I-set
ENSDARG00000007018	1.53268	2.69904	1.29457	2.07122	6.03134	2.82503	8.93061	4.19818	ms4a17a.6	4	76735113	76742479	+	1035	protein_coding	membrane-spanning 4-domains, subfamily A, member 17A.6 [Source:ZFIN;Acc:ZDB-GENE-070209-265]	-
ENSDARG00000099509	2.26959	1.88806	1.37691	1.66631	7.10736	4.76611	5.90679	1.88136	btr23	19	4038589	4047224	+	1660	protein_coding	bloodthirsty-related gene family, member 23 [Source:ZFIN;Acc:ZDB-GENE-070705-375]	SPRY
ENSDARG00000086166	0.144107	0.158452	0.229117	0.201023	0.435519	0.449986	1.08931	1.49995	si:ch211-286b5.9	1	55348537	55353978	+	1720	protein_coding	si:ch211-286b5.9 [Source:ZFIN;Acc:ZDB-GENE-121214-63]	-
ENSDARG00000055550	1.11399	1.27592	0.295192	0.604324	8.88437	3.54296	12.0853	0.169519	FO834888.1	21	8533533	8538300	+	801	protein_coding	-	Peptidase_C14
ENSDARG00000056530	0.526004	0.590708	0.560933	0.581635	0.193865	0.356096	0.26669	0.228416	cpamd8	22	21252790	21304247	+	7728	protein_coding	C3 and PZP-like, alpha-2-macroglobulin domain containing 8 [Source:ZFIN;Acc:ZDB-GENE-050208-428]	A2M_comp
ENSDARG00000013732	4.85149	4.54321	4.02652	3.67467	8.50427	5.9637	7.22692	6.99261	vta1	20	37300296	37379578	+	4874	protein_coding	vesicle (multivesicular body) trafficking 1 [Source:ZFIN;Acc:ZDB-GENE-040426-2154]	DUF605
ENSDARG00000092807	111.404	226.424	255.939	143.404	427.492	600.488	242.771	571.71	RPL41	23	25305431	25306603	+	461	protein_coding	si:dkey-151g10.6 [Source:ZFIN;Acc:ZDB-GENE-030131-7528]	-
ENSDARG00000092066	0.266162	0.640187	2.11587	1.94925	0.167582	0	0	0	CT583708.1	2	14489942	14491843	-	745	sense_intronic	-	-
ENSDARG00000070555	3.77047	4.70419	3.03054	5.00736	1.27897	2.29294	1.15688	2.51524	ldlrad4a	19	12444943	12622855	+	3563	protein_coding	low density lipoprotein receptor class A domain containing 4a [Source:ZFIN;Acc:ZDB-GENE-060503-850]	Ldl_recept_a
ENSDARG00000078068	0.34888	0.479511	0.479049	0.486674	0.858685	1.15543	1.95793	0.825307	abcg4b	15	23487730	23508214	-	3126	protein_coding	ATP-binding cassette, sub-family G (WHITE), member 4b [Source:ZFIN;Acc:ZDB-GENE-080215-10]	ABC2_membrane
ENSDARG00000077504	38.9802	21.9349	12.3501	77.6236	12.0047	12.7403	10.498	10.0581	si:ch211-103n10.5	8	29718692	29719393	-	702	protein_coding	si:ch211-103n10.5 [Source:ZFIN;Acc:ZDB-GENE-030131-5155]	-
ENSDARG00000014053	2.06628	1.30885	1.05698	0.952437	0.724024	0.249358	0.384819	0.393722	olfm1b	21	6751405	6813561	+	2759	protein_coding	olfactomedin 1b [Source:ZFIN;Acc:ZDB-GENE-040801-228]	-
ENSDARG00000099257	0	0.848257	1.17117	0.972016	0.0501401	0	0.0752457	0	si:ch73-119p20.1	7	13375565	13381129	-	2490	protein_coding	si:ch73-119p20.1 [Source:ZFIN;Acc:ZDB-GENE-141216-395]	-
ENSDARG00000103591	0.524975	0.41231	0.387523	0.130771	0.0708295	0.0650509	0.023621	0	dkk3a	7	65472578	65492048	-	2644	protein_coding	dickkopf WNT signaling pathway inhibitor 3a [Source:ZFIN;Acc:ZDB-GENE-110519-1]	-
ENSDARG00000029296	0.775439	0.448307	0.567516	0.738308	0.302241	0.330964	0.27137	0.252858	nexmifb	14	11103718	11268375	+	8055	protein_coding	neurite extension and migration factor b [Source:ZFIN;Acc:ZDB-GENE-140106-18]	-
ENSDARG00000070826	41.6156	45.5426	67.175	66.0253	76.7016	116.067	104.106	157.785	bpgm	25	20116407	20127087	+	2654	protein_coding	2,3-bisphosphoglycerate mutase [Source:ZFIN;Acc:ZDB-GENE-040718-375]	-
ENSDARG00000055974	15.4424	16.3321	17.9771	13.217	27.4219	28.0603	32.447	21.0775	tpmt.1	19	47290287	47298657	+	947	protein_coding	thiopurine S-methyltransferase, tandem duplicate 1 [Source:ZFIN;Acc:ZDB-GENE-050522-141]	-
ENSDARG00000042090	48.2906	34.0671	21.9822	102.606	17.3471	13.8241	16.2469	22.998	si:ch73-55i23.1	5	1911814	1923875	+	1972	protein_coding	si:ch73-55i23.1 [Source:ZFIN;Acc:ZDB-GENE-140106-38]	-
ENSDARG00000091836	4.26527	6.73801	5.74028	5.03642	13.9736	9.88615	13.3559	7.07768	casp7	12	30569621	30583668	-	2801	protein_coding	caspase 7, apoptosis-related cysteine peptidase [Source:ZFIN;Acc:ZDB-GENE-050522-506]	Peptidase_C14
ENSDARG00000096280	0	0.0406529	0	0.16504	0.297969	0.051311	3.46552	0.648137	ighz	3	33994684	33997763	-	1676	protein_coding	immunoglobulin heavy constant zeta [Source:ZFIN;Acc:ZDB-GENE-040513-8]	C1-set
ENSDARG00000075515	0.0899686	0.0618278	0	0.0627513	1.24622	0.546262	0.453386	0.36965	zgc:171713	12	28971580	28983584	-	1102	protein_coding	zgc:171713 [Source:ZFIN;Acc:ZDB-GENE-070820-17]	Tetraspannin
ENSDARG00000094466	1.43217	3.53421	3.26029	1.8162	0.901731	0.846985	0.615107	1.15903	si:ch73-199e17.1	9	7678136	7684002	-	1523	protein_coding	si:ch73-199e17.1 [Source:ZFIN;Acc:ZDB-GENE-100921-8]	Tubulin
ENSDARG00000104311	0.471954	0.384396	0.250122	0.414522	1.02353	0.515498	1.07907	1.1491	scmh1	16	35555029	35586411	-	5672	protein_coding	Scm polycomb group protein homolog 1 [Source:ZFIN;Acc:ZDB-GENE-070410-82]	MBT
ENSDARG00000115887	30.8339	36.4085	21.9385	22.9318	180.087	99.7391	157.422	13.9984	CABZ01021532.1	1	52735484	52736125	+	582	protein_coding	-	-
ENSDARG00000028793	9.36106	3.70653	2.89584	7.09049	2.31136	2.57183	2.13457	1.81768	nlk2	15	30157602	30301528	+	3511	protein_coding	nemo-like kinase, type 2 [Source:ZFIN;Acc:ZDB-GENE-080320-1]	Pkinase
ENSDARG00000053829	1.04664	0.392328	0.491656	0.663646	0.209679	0.123796	0.119873	0	pax9	17	38236469	38291065	-	2084	protein_coding	paired box 9 [Source:ZFIN;Acc:ZDB-GENE-980526-399]	-
ENSDARG00000059049	5.05365	4.65447	3.60327	2.58003	7.70874	5.51322	11.5194	13.5571	zgc:174904	19	5690933	5699703	-	1903	protein_coding	zgc:174904 [Source:ZFIN;Acc:ZDB-GENE-080204-76]	Lectin_C
ENSDARG00000042329	0.334365	0.136166	0.374097	0.552801	0.0623776	0.0859328	0.0468053	0.101762	si:dkey-91m11.5	8	30501170	30593651	+	4003	protein_coding	si:dkey-91m11.5 [Source:ZFIN;Acc:ZDB-GENE-060503-932]	RhoGAP
ENSDARG00000116660	0.630458	0.38512	0.334124	0.260582	1.35258	0.972178	2.29459	0.767507	si:ch211-9d9.8	2	51509663	51512294	-	2123	protein_coding	si:ch211-9d9.8 [Source:ZFIN;Acc:ZDB-GENE-060503-515]	V-set
ENSDARG00000069537	6.2045	8.52765	9.36132	7.86018	0.159449	2.96542	1.9143	0	si:dkey-238c7.16	18	7479201	7481036	-	783	protein_coding	si:dkey-238c7.16 [Source:ZFIN;Acc:ZDB-GENE-030131-4169]	-
ENSDARG00000011222	1.11172	1.59744	0.88377	2.4672	0.381801	0.438314	0.381981	0.138415	ccdc28b	13	33282095	33293654	+	981	protein_coding	coiled-coil domain containing 28B [Source:ZFIN;Acc:ZDB-GENE-060208-3]	-
ENSDARG00000069143	0.832518	1.24826	1.2033	1.90036	2.38261	2.82281	3.28956	7.77394	map3k7cl	10	25355308	25369173	+	1310	protein_coding	map3k7 C-terminal like [Source:ZFIN;Acc:ZDB-GENE-091204-239]	-
ENSDARG00000078446	0.287211	0.789504	0.182656	0.400649	3.83371	1.49474	4.77631	0.314681	ftr07	2	42312889	42314218	-	863	protein_coding	finTRIM family, member 7 [Source:ZFIN;Acc:ZDB-GENE-070912-229]	zf-B_box
ENSDARG00000045071	4.59501	3.03983	5.97185	5.02682	0.552216	0.893048	0.792684	3.18572	chad	12	26512569	26525699	+	2600	protein_coding	chondroadherin [Source:ZFIN;Acc:ZDB-GENE-040426-1130]	-
ENSDARG00000104343	0.952186	1.14657	0.897618	1.1637	0.339551	0.511627	0.307864	0.715507	ppic	KN150596.1	17881	29810	+	5883	protein_coding	peptidylprolyl isomerase C [Source:ZFIN;Acc:ZDB-GENE-170217-1]	Pro_isomerase
ENSDARG00000062058	12.9539	7.28292	10.6495	8.98488	6.21912	5.3726	5.06839	5.55201	slc12a7b	24	39778648	39885785	-	4818	protein_coding	solute carrier family 12 (potassium/chloride transporter), member 7b [Source:ZFIN;Acc:ZDB-GENE-030829-61]	AA_permease
ENSDARG00000105188	0.981115	0.405992	0.989606	0.750532	0.0398538	0.109807	0.106327	0.462344	vimr2	14	33788835	33824329	-	4699	protein_coding	vimentin-related 2 [Source:ZFIN;Acc:ZDB-GENE-160113-76]	Filament
ENSDARG00000079353	7.21932	6.66059	2.77057	3.5421	16.6981	7.91739	39.5799	8.68259	si:ch211-165d12.4	3	34587988	34593639	-	2987	protein_coding	si:ch211-165d12.4 [Source:ZFIN;Acc:ZDB-GENE-080303-7]	V-set
ENSDARG00000101687	1.10071	0.578991	0.712976	1.21319	0.376463	0.259312	0.273921	0.44666	CU929259.1	24	40529346	40639444	+	3648	protein_coding	-	Tubulin-binding
ENSDARG00000004953	17.7648	20.3421	7.32774	7.15365	80.5441	37.9124	94.0761	9.66081	mxb	1	7574351	7603734	-	2291	protein_coding	myxovirus (influenza) resistance B [Source:ZFIN;Acc:ZDB-GENE-030721-6]	-
ENSDARG00000038709	2.54337	2.54232	2.9409	2.5803	0.465854	1.60443	0.524333	1.01332	si:dkeyp-66d1.7	2	37750016	37755128	+	1072	protein_coding	si:dkeyp-66d1.7 [Source:ZFIN;Acc:ZDB-GENE-070912-662]	-
ENSDARG00000071543	7.15535	5.87242	2.53718	2.58512	20.484	11.5199	32.1673	4.93506	SHISA4 (1 of many)	22	10575060	10580194	-	963	protein_coding	si:dkey-42i9.7 [Source:ZFIN;Acc:ZDB-GENE-050208-731]	-
ENSDARG00000044183	14.3352	10.4935	6.06932	16.0498	5.31129	5.00146	2.95958	6.14212	prkab1a	10	17936441	17946163	+	1857	protein_coding	protein kinase, AMP-activated, beta 1 non-catalytic subunit, a [Source:ZFIN;Acc:ZDB-GENE-040718-377]	-
ENSDARG00000100452	44.2891	53.4394	61.7188	58.4432	82.6585	105.353	90.4896	209.424	nop53	15	6652396	6666303	+	1595	protein_coding	NOP53 ribosome biogenesis factor [Source:ZFIN;Acc:ZDB-GENE-051120-21]	-
ENSDARG00000014975	0.266	0.0332362	0.153788	0.640921	0	0	0	0	irge1	16	25975426	25978063	-	2050	protein_coding	immunity-related GTPase family, e1 [Source:ZFIN;Acc:ZDB-GENE-051209-1]	IIGP
ENSDARG00000104119	0.312648	0.338812	0.248541	0.461293	0.96154	0.803128	0.63628	0.559937	kalrna	9	4250918	4419788	+	8245	protein_coding	kalirin RhoGEF kinase a [Source:ZFIN;Acc:ZDB-GENE-100921-4]	RhoGEF
ENSDARG00000006207	3.03389	7.1596	7.55398	4.31202	21.7693	34.2599	13.4139	5.80143	gpx1b	6	42338309	42341219	+	866	protein_coding	glutathione peroxidase 1b [Source:ZFIN;Acc:ZDB-GENE-040912-60]	GSHPx
ENSDARG00000074335	1.01753	1.29655	1.26389	1.1237	0.480496	0.680329	0.560843	0.696779	boc	24	21206243	21258945	-	4677	protein_coding	BOC cell adhesion associated, oncogene regulated [Source:ZFIN;Acc:ZDB-GENE-030131-6560]	I-set
ENSDARG00000008433	16.3691	84.9812	109.303	56.9954	16.1027	20.389	13.4877	30.8119	unc45b	8	11204059	11229523	-	3834	protein_coding	unc-45 myosin chaperone B [Source:ZFIN;Acc:ZDB-GENE-020919-3]	-
ENSDARG00000101917	0.308727	0.484941	0.701212	0.369139	0	0	0.055564	0	pmfbp1	7	67817256	67842997	-	1124	protein_coding	polyamine modulated factor 1 binding protein 1 [Source:ZFIN;Acc:ZDB-GENE-131127-619]	-
ENSDARG00000069266	7.59308	5.55045	9.38106	13.0545	3.4105	1.71994	2.9856	5.56386	esrra	21	26606741	26634099	+	2050	protein_coding	estrogen-related receptor alpha [Source:ZFIN;Acc:ZDB-GENE-990415-68]	zf-C4
ENSDARG00000045636	2.38537	2.44724	1.69855	2.65726	0.918215	1.23554	1.15365	1.59474	rbl2	25	36010815	36044583	-	8770	protein_coding	retinoblastoma-like 2 (p130) [Source:ZFIN;Acc:ZDB-GENE-061109-2]	-
ENSDARG00000100869	4.32543	3.46165	2.75082	3.98689	2.22009	2.07062	2.08318	1.94964	adcy9	22	26600834	26697254	+	4527	protein_coding	adenylate cyclase 9 [Source:ZFIN;Acc:ZDB-GENE-050208-455]	Guanylate_cyc
ENSDARG00000005098	0.584973	0.700927	0.548494	0.355698	3.45648	2.05561	3.00459	0.287593	zgc:86764	21	20309085	20322816	-	3305	protein_coding	zgc:86764 [Source:ZFIN;Acc:ZDB-GENE-040718-435]	-
ENSDARG00000094160	7.1648	12.3493	15.1475	7.83362	5.12075	3.89675	5.65989	2.12164	si:ch73-160h15.3	1	46830809	46832880	-	1280	protein_coding	si:ch73-160h15.3 [Source:ZFIN;Acc:ZDB-GENE-100922-213]	-
ENSDARG00000038489	0.936566	1.25731	0.519439	0.88111	4.74491	2.11593	3.53979	1.01421	b3gnt7	22	36656680	36661461	+	2276	protein_coding	UDP-GlcNAc:betaGal beta-1,3-N-acetylglucosaminyltransferase 7 [Source:ZFIN;Acc:ZDB-GENE-021210-4]	Galactosyl_T
ENSDARG00000098665	0	0.666675	0.154239	0.270653	1.22161	1.68292	1.58885	3.98585	CT583690.1	24	34112756	34115514	-	511	processed_transcript	-	-
ENSDARG00000030563	1.53377	1.94896	2.25452	1.97808	3.49839	3.6648	3.28129	3.96336	zgc:77880	1	10305611	10315206	+	1713	protein_coding	zgc:77880 [Source:ZFIN;Acc:ZDB-GENE-040426-1901]	-
ENSDARG00000100743	0.149365	0.228102	0.0923525	0.0926039	0.574714	0.230324	0.574986	0.409127	si:dkey-190j3.4	4	70010099	70313412	+	5974	protein_coding	si:dkey-190j3.4 [Source:ZFIN;Acc:ZDB-GENE-070424-218]	NACHT
ENSDARG00000075248	1.85612	1.60916	0.635615	1.27469	9.96058	4.11162	7.08722	0.938604	zgc:172133	22	6456003	6465060	-	1736	protein_coding	zgc:172133 [Source:ZFIN;Acc:ZDB-GENE-080204-48]	V-set
ENSDARG00000053358	0.445142	0.222479	0.225189	0.112901	0.687942	1.12323	0.611793	1.16387	basp1	2	42724404	42748657	+	2450	protein_coding	brain abundant, membrane attached signal protein 1 [Source:ZFIN;Acc:ZDB-GENE-070424-158]	-
ENSDARG00000096667	35.6761	17.1452	11.1118	38.7704	11.4104	9.23413	9.98239	9.62736	hemgn	1	26667872	26671210	+	2440	protein_coding	hemogen [Source:ZFIN;Acc:ZDB-GENE-121214-307]	-
ENSDARG00000103888	17.053	18.5325	9.45795	5.53216	4.49456	2.75191	1.49889	2.17256	RF00001	1	58527632	58527756	-	125	rRNA	-	-
ENSDARG00000105375	2.59997	5.05051	4.62977	3.96536	7.15916	7.39697	7.94868	9.11562	si:ch211-285c6.5	7	3357973	3393353	+	1430	protein_coding	si:ch211-285c6.5 [Source:ZFIN;Acc:ZDB-GENE-160113-125]	-
ENSDARG00000007836	32.7946	36.9292	51.8	34.991	67.549	79.7632	53.4291	106.646	ctsla	5	44804791	44810920	+	2083	protein_coding	cathepsin La [Source:ZFIN;Acc:ZDB-GENE-030131-106]	Peptidase_C1
ENSDARG00000102748	0.862133	0.592471	0.913812	1.60352	2.7141	3.24048	4.8877	4.32937	CABZ01074745.1	KN149951.1	442	4132	+	345	protein_coding	-	-
ENSDARG00000079291	5.06075	3.40963	4.93588	5.47758	2.30276	2.50836	2.26813	3.26163	rapgef3	23	33381154	33444055	+	3497	protein_coding	Rap guanine nucleotide exchange factor (GEF) 3 [Source:ZFIN;Acc:ZDB-GENE-090312-38]	cNMP_binding
ENSDARG00000051962	0.557593	0.675138	0.580462	0.462989	0.175537	0.149701	0.0836287	0.400009	mmp15a	25	17559399	17590971	-	7468	protein_coding	matrix metallopeptidase 15a [Source:ZFIN;Acc:ZDB-GENE-070817-4]	Hemopexin
ENSDARG00000010384	2.52439	1.99502	1.40475	1.80473	3.73513	3.39391	8.66642	3.97587	lpar5a	2	48282590	48284160	+	1571	protein_coding	lysophosphatidic acid receptor 5a [Source:ZFIN;Acc:ZDB-GENE-030131-1193]	7tm_1
ENSDARG00000074132	31.5506	12.4836	4.94027	4.93466	1.62532	4.8928	3.91466	2.35692	scpp7	1	43917934	43920576	-	1037	protein_coding	secretory calcium-binding phosphoprotein 7 [Source:ZFIN;Acc:ZDB-GENE-090313-257]	-
ENSDARG00000102096	0.627105	1.42216	0.69793	0.874788	0.315873	0.217577	0.197514	0.171771	adra2b	8	40644838	40646418	+	1581	protein_coding	adrenoceptor alpha 2B [Source:ZFIN;Acc:ZDB-GENE-021010-2]	7tm_1
ENSDARG00000012833	1.41	1.00297	1.3372	1.67359	0.716448	0.579323	0.685622	0.711447	foxn3	17	16564921	16734329	+	4008	protein_coding	forkhead box N3 [Source:ZFIN;Acc:ZDB-GENE-060512-39]	Fork_head
ENSDARG00000023933	3.42191	2.47536	2.79186	3.07761	1.72929	1.13257	1.75847	1.29495	skila	2	37307326	37353098	-	2202	protein_coding	SKI-like proto-oncogene a [Source:ZFIN;Acc:ZDB-GENE-070912-548]	-
ENSDARG00000086990	0.0187752	0.111822	0.0895526	0.0698417	0	0	0.0078846	0	carmil3	2	38742338	38890677	+	7921	protein_coding	capping protein regulator and myosin 1 linker 3 [Source:ZFIN;Acc:ZDB-GENE-070912-183]	-
ENSDARG00000090973	0.664513	0.669773	0.598694	1.26686	0.0836788	0.0768519	0.279061	0.364034	si:dkey-264d12.1	11	40032790	40072301	+	2238	protein_coding	si:dkey-264d12.1 [Source:ZFIN;Acc:ZDB-GENE-141215-69]	-
ENSDARG00000021924	3.1745	4.5654	5.44828	3.04996	1.74725	1.45882	1.43024	2.76407	hsp70.3	3	26123736	26127091	+	2358	protein_coding	heat shock cognate 70-kd protein, tandem duplicate 3 [Source:ZFIN;Acc:ZDB-GENE-110713-1]	HSP70
ENSDARG00000043799	0.656302	0.288653	0.417385	0.854481	0.143251	0.182165	0.198441	0.239691	zmp:0000000619	17	4578552	4854851	+	5665	protein_coding	zmp:0000000619 [Source:ZFIN;Acc:ZDB-GENE-130530-622]	BACK
ENSDARG00000058725	13.4903	7.74422	4.3069	15.7198	4.77564	2.63161	3.00325	4.30356	rfesd	21	11829836	11834452	-	915	protein_coding	Rieske (Fe-S) domain containing [Source:ZFIN;Acc:ZDB-GENE-050417-254]	-
ENSDARG00000024211	0	0.119534	0.276548	0	0.985649	1.05611	1.86266	0.714657	ifng1-2	4	13507584	13509946	-	570	protein_coding	interferon, gamma 1-2 [Source:ZFIN;Acc:ZDB-GENE-040629-1]	-
ENSDARG00000089327	0.642663	0.441648	0.0928889	0.529744	2.05997	0.861493	4.19549	0.88016	BX120005.1	10	29840725	29848513	+	1697	protein_coding	-	ig
ENSDARG00000078093	0.797263	0.391351	0.248989	0.158879	3.7469	1.35837	2.42139	0.31197	zgc:172065	7	2236317	2242989	+	3482	protein_coding	zgc:172065 [Source:ZFIN;Acc:ZDB-GENE-080214-2]	-
ENSDARG00000052094	1.54209	1.35269	2.01326	1.13679	0.528887	0.9461	0.394878	0.807016	notch1b	5	65679595	65782785	-	7908	protein_coding	notch 1b [Source:ZFIN;Acc:ZDB-GENE-990415-183]	EGF_CA
ENSDARG00000057241	1.89954	2.06687	1.04865	0.809656	4.48499	3.11219	7.04642	2.2402	tnfsf10	24	26932472	26937526	+	1879	protein_coding	TNF superfamily member 10 [Source:ZFIN;Acc:ZDB-GENE-040718-335]	-
ENSDARG00000095512	22.4488	23.6183	33.2809	26.5562	4.87939	16.2204	4.77558	13.1516	rca2.2	23	26125676	26128664	-	1177	protein_coding	regulator of complement activation group 2 gene 2 [Source:ZFIN;Acc:ZDB-GENE-060503-646]	Sushi
ENSDARG00000038964	0.890694	0.612098	0.265524	0.504759	3.68027	1.06229	5.26002	0.609926	traf4b	21	39005905	39024754	-	1781	protein_coding	tnf receptor-associated factor 4b [Source:ZFIN;Acc:ZDB-GENE-040305-2]	zf-C3HC4
ENSDARG00000059832	0.203723	0.240003	0.277631	0.216523	0.0610806	0.100975	0.0366657	0.0265724	adgrb3	13	38302665	38593701	+	5110	protein_coding	adhesion G protein-coupled receptor B3 [Source:ZFIN;Acc:ZDB-GENE-070424-99]	7tm_2
ENSDARG00000059054	34.1859	86.0885	84.2748	202.053	225.102	378.199	155.897	838.047	pdk2b	19	5674907	5687743	+	2368	protein_coding	pyruvate dehydrogenase kinase, isozyme 2b [Source:ZFIN;Acc:ZDB-GENE-040426-939]	HATPase_c
ENSDARG00000014218	1.32233	0.444266	0.700796	1.31171	0.296026	0.254882	0.0740414	0.241467	mecp2	8	7616573	7637640	-	1687	protein_coding	methyl CpG binding protein 2 [Source:ZFIN;Acc:ZDB-GENE-030131-7190]	MBD
ENSDARG00000093622	2.07326	1.95641	1.08237	0.949652	5.92292	3.86504	5.22399	1.86471	spc24	3	19355869	19363981	+	1602	protein_coding	SPC24, NDC80 kinetochore complex component, homolog (S. cerevisiae) [Source:ZFIN;Acc:ZDB-GENE-050522-456]	-
ENSDARG00000079078	3471.9	2425.56	532.28	1327.36	845.152	570.959	531.476	556.986	si:ch211-5k11.8	3	55105066	55105966	+	657	protein_coding	si:ch211-5k11.8 [Source:ZFIN;Acc:ZDB-GENE-131121-640]	-
ENSDARG00000034871	2.27871	2.21599	2.35834	2.36904	1.24524	1.0442	0.974996	1.58985	mid2	14	28281744	28385565	+	2306	protein_coding	midline 2 [Source:ZFIN;Acc:ZDB-GENE-090220-1]	SPRY
ENSDARG00000099500	15.3733	17.8527	19.2139	22.7066	7.86775	7.13078	7.66433	14.4116	clec3bb	19	2857714	2861444	-	603	protein_coding	C-type lectin domain family 3, member Bb [Source:ZFIN;Acc:ZDB-GENE-111027-16]	Lectin_C
ENSDARG00000094554	0	0.206938	0	0.105014	0	1.56715	1.37522	2.88684	si:ch73-7i4.1	9	28598577	28606714	+	1317	protein_coding	si:ch73-7i4.1 [Source:ZFIN;Acc:ZDB-GENE-100921-19]	-
ENSDARG00000089717	2.20148	1.89112	0.562527	0.987102	0.445535	0.272791	0.396218	0.10768	qpct	17	42842632	42872234	+	1261	protein_coding	glutaminyl-peptide cyclotransferase [Source:ZFIN;Acc:ZDB-GENE-130827-1]	-
ENSDARG00000057610	1.23386	1.96599	1.14579	0.746354	6.95743	4.64082	7.40093	0.687896	cdkn2c	8	16407884	16414886	+	4540	protein_coding	cyclin-dependent kinase inhibitor 2C (p18, inhibits CDK4) [Source:ZFIN;Acc:ZDB-GENE-081104-145]	-
ENSDARG00000005216	0.289814	0.219081	0.115195	0.20214	0	0.0502761	0.018256	0	zgc:158328	15	35253247	35339302	+	3421	protein_coding	zgc:158328 [Source:ZFIN;Acc:ZDB-GENE-070112-1202]	EGF_CA
ENSDARG00000059689	1.0178	0.658302	0.285566	1.25275	0	0.103861	0.0754274	0	mblac2	5	48659747	48664522	-	828	protein_coding	metallo-beta-lactamase domain containing 2 [Source:ZFIN;Acc:ZDB-GENE-081104-313]	Lactamase_B
ENSDARG00000061416	1.41721	2.84062	2.15935	3.91271	4.16411	11.678	2.6038	27.0923	c2cd4a	25	32886143	32888115	-	1679	protein_coding	C2 calcium dependent domain containing 4A [Source:ZFIN;Acc:ZDB-GENE-030131-5712]	C2
ENSDARG00000062949	1.70742	1.16018	1.52508	1.47189	0.942164	0.399368	0.410881	0.578031	nt5dc3	25	18928189	18948816	-	2584	protein_coding	5'-nucleotidase domain containing 3 [Source:ZFIN;Acc:ZDB-GENE-080523-3]	-
ENSDARG00000099409	0.750469	0.630342	0.265151	1.19228	2.54633	1.73586	3.80817	1.14201	zgc:162182	11	20899029	20906178	+	2378	protein_coding	zgc:162182 [Source:ZFIN;Acc:ZDB-GENE-070424-58]	-
ENSDARG00000051762	34.2725	92.3477	140.882	112.265	33.1939	37.0835	19.9919	48.734	DNAJA4	25	34662358	34670413	-	1134	protein_coding	DnaJ heat shock protein family (Hsp40) member A4 [Source:HGNC Symbol;Acc:HGNC:14885]	DnaJ_C
ENSDARG00000018010	11.4932	17.0222	16.8029	12.0244	5.40651	8.93776	5.24263	9.13675	crtap	19	42609132	42617723	+	1501	protein_coding	cartilage associated protein [Source:ZFIN;Acc:ZDB-GENE-040426-2619]	-
ENSDARG00000106998	0.191622	0.579417	0.700724	0.561342	2.12344	0.96402	1.18293	1.67959	si:dkey-240n22.6	4	76902513	76914227	+	2587	protein_coding	si:dkey-240n22.6 [Source:ZFIN;Acc:ZDB-GENE-070705-411]	NACHT
ENSDARG00000094041	99.9299	123.209	116.238	82.123	498.224	194.527	529.98	88.9844	krt17	19	5367330	5372572	-	1706	protein_coding	keratin 17 [Source:ZFIN;Acc:ZDB-GENE-060503-86]	Filament
ENSDARG00000031618	0.929113	0.164774	0.428867	0.209045	1.73611	2.18373	2.52987	0.738853	unm_sa1261	3	58506242	58543658	-	1654	protein_coding	un-named sa1261 [Source:ZFIN;Acc:ZDB-GENE-120411-10]	Pkinase
ENSDARG00000088546	1.83376	1.84828	1.36058	1.44955	0.461833	0.636231	0.462051	0	myct1b	17	8175998	8179152	+	811	protein_coding	myc target 1b [Source:ZFIN;Acc:ZDB-GENE-131127-631]	-
ENSDARG00000099891	6.00742	7.94164	6.48903	6.07718	3.8113	4.13678	3.29313	3.39148	si:ch211-57n23.1	19	41509956	41513809	+	1081	protein_coding	si:ch211-57n23.1 [Source:ZFIN;Acc:ZDB-GENE-141219-29]	-
ENSDARG00000009020	0.469883	0.415171	0.373537	0.234096	0.0211322	0.174673	0.0211422	0	cnr1	20	902412	915234	-	2954	protein_coding	cannabinoid receptor 1 [Source:ZFIN;Acc:ZDB-GENE-040312-3]	7tm_1
ENSDARG00000076496	3.13617	3.0194	3.70957	4.45937	2.25125	1.70838	1.45064	2.24095	frmd4bb	23	799100	838344	+	3272	protein_coding	FERM domain containing 4Bb [Source:ZFIN;Acc:ZDB-GENE-100921-74]	-
ENSDARG00000092176	0.0263895	0	0	0	0	0.366238	1.09714	0.0361418	BX321875.1	3	1782815	1804482	+	3757	processed_transcript	-	-
ENSDARG00000045391	0.374059	0.432942	0	0.384483	2.25601	0.68306	3.00116	0.701033	cd226	24	15114092	15133886	-	2518	protein_coding	CD226 molecule [Source:ZFIN;Acc:ZDB-GENE-070112-1322]	V-set
ENSDARG00000115716	11.2894	4.72397	1.51327	6.67547	0.133172	0.275191	2.43154	1.23112	CT583728.22	4	55793431	55795305	-	1875	rRNA	-	-
ENSDARG00000030490	20.9284	9.32062	7.62472	23.1472	6.43121	6.37183	5.51857	7.00343	sptb	17	38566717	38599022	+	7639	protein_coding	spectrin, beta, erythrocytic [Source:ZFIN;Acc:ZDB-GENE-000906-1]	CH
ENSDARG00000074656	16.3492	9.52724	8.68315	6.59288	34.3863	17.0051	45.1644	14.8634	ctss2.1	16	29509133	29513434	+	1416	protein_coding	cathepsin S, ortholog2, tandem duplicate 1 [Source:ZFIN;Acc:ZDB-GENE-050522-559]	Peptidase_C1
ENSDARG00000105670	4.69636	5.37902	6.22234	7.76443	2.19033	3.62094	1.97223	0.714657	CT030129.1	7	32538063	32595400	-	570	lincRNA	-	-
ENSDARG00000070346	2.4243	1.20642	1.32911	1.34106	0.368441	0.652593	0.315956	0.686938	hoxc8a	23	36101185	36103635	+	1186	protein_coding	homeobox C8a [Source:ZFIN;Acc:ZDB-GENE-990415-114]	Homeobox
ENSDARG00000006434	3.48152	3.60669	4.00691	2.86321	2.22477	0.766223	1.73483	1.20982	polr1e	1	19637312	19648227	-	1908	protein_coding	polymerase (RNA) I polypeptide E [Source:ZFIN;Acc:ZDB-GENE-050522-251]	-
ENSDARG00000105316	0.265589	0.841163	0.47734	0.531566	3.69341	1.66265	1.7021	0.506069	si:dkey-187j14.7	7	2259413	2263911	+	4293	protein_coding	si:dkey-187j14.7 [Source:ZFIN;Acc:ZDB-GENE-160113-3]	-
ENSDARG00000099844	1.70311	2.50801	1.98249	1.44243	0.842538	0.158277	0.459783	0.999642	GNAZ	10	17254502	17284055	-	1630	protein_coding	G protein subunit alpha z [Source:HGNC Symbol;Acc:HGNC:4395]	G-alpha
ENSDARG00000102483	0.679513	0.733189	0.48465	0.52267	3.19079	1.70761	2.0802	0.452268	wu:fb44b02	15	44021044	44052927	-	7806	protein_coding	wu:fb44b02 [Source:ZFIN;Acc:ZDB-GENE-030131-739]	-
ENSDARG00000039117	8.8426	6.08839	4.40855	5.04724	28.0825	12.7588	10.1605	10.3274	tefa	12	19144833	19153177	-	2932	protein_coding	thyrotrophic embryonic factor a [Source:ZFIN;Acc:ZDB-GENE-990415-264]	bZIP_2
ENSDARG00000091730	2.7197	16.9911	9.04126	1.81071	103.989	24.877	43.9202	6.26438	gig2l	21	22642698	22648007	-	802	protein_coding	grass carp reovirus (GCRV)-induced gene 2l [Source:ZFIN;Acc:ZDB-GENE-130517-7]	-
ENSDARG00000061177	3.83215	3.58158	2.31526	2.69423	9.20731	5.55765	21.8415	3.4429	mov10b.1	8	27659244	27687095	-	3234	protein_coding	Moloney leukemia virus 10b, tandem duplicate 1 [Source:ZFIN;Acc:ZDB-GENE-030131-9089]	-
ENSDARG00000016570	0.13398	0.0324964	0.0125304	0	0.367202	0.123049	1.00284	0.151112	prlra	21	11105007	11135942	+	6290	protein_coding	prolactin receptor a [Source:ZFIN;Acc:ZDB-GENE-080103-2]	fn3
ENSDARG00000016233	2.50137	1.52798	1.36583	1.93851	7.95418	5.12828	6.7165	1.52256	sdr16c5a	2	11483072	11504778	-	1962	protein_coding	short chain dehydrogenase/reductase family 16C, member 5a [Source:ZFIN;Acc:ZDB-GENE-040426-2049]	adh_short
ENSDARG00000039020	0.251072	0.191711	0.340044	0.07783	1.34662	0.516209	1.33554	0.229237	fbxo5	13	46941930	46958802	+	5331	protein_coding	F-box protein 5 [Source:ZFIN;Acc:ZDB-GENE-030131-4027]	IBR
ENSDARG00000052978	24.3497	13.1563	8.91473	22.6364	9.61222	6.84827	6.55788	7.70308	mbnl1	2	47708853	47829287	+	2838	protein_coding	muscleblind-like splicing regulator 1 [Source:ZFIN;Acc:ZDB-GENE-060929-704]	-
ENSDARG00000068973	3.24282	6.35676	4.9445	4.44946	2.00829	2.16722	2.71248	2.62105	pdlim4	21	43738398	43801511	-	1865	protein_coding	PDZ and LIM domain 4 [Source:ZFIN;Acc:ZDB-GENE-070308-5]	PDZ
ENSDARG00000009673	2.39142	1.31474	0.939354	0.706433	6.97935	2.9772	7.40798	1.54126	si:ch211-197g15.6	22	17493170	17499513	-	1762	protein_coding	si:ch211-197g15.6 [Source:ZFIN;Acc:ZDB-GENE-050208-457]	-
ENSDARG00000101421	0.238015	0.112805	0.260981	0.354919	1.53994	0.455615	1.76815	0.224809	si:dkeyp-80d11.10	4	71018579	71124547	+	6040	protein_coding	si:dkeyp-80d11.10 [Source:ZFIN;Acc:ZDB-GENE-070424-271]	NACHT
ENSDARG00000074311	0.823501	0.129766	0.00833946	0	0.0132101	0.00909927	0.00660818	0.0143672	mast2	6	33663666	33871055	-	9451	protein_coding	microtubule associated serine/threonine kinase 2 [Source:ZFIN;Acc:ZDB-GENE-050309-150]	Pkinase
ENSDARG00000099995	1.65417	1.17286	1.35674	1.99618	0.446361	0.683241	0.56235	1.0788	apbb2b	1	19930520	19989584	+	3776	protein_coding	amyloid beta (A4) precursor protein-binding, family B, member 2b [Source:ZFIN;Acc:ZDB-GENE-090313-73]	PID
ENSDARG00000104114	0.286096	0.142989	0.24811	0.145125	1.50657	0.812146	0.950243	0.213722	kmt5ab	5	69785990	69793797	+	1906	protein_coding	lysine methyltransferase 5Ab [Source:ZFIN;Acc:ZDB-GENE-071004-17]	SET
ENSDARG00000020224	1.53087	0.0472826	0.0273478	0.287933	0.0433202	0	0.0216703	0	si:ch211-225b10.3	12	30360184	30367008	+	2882	protein_coding	si:ch211-225b10.3 [Source:ZFIN;Acc:ZDB-GENE-130531-53]	-
ENSDARG00000104632	0.475137	3.04754	2.51809	2.20933	0.199439	0.686879	0	0	RERG	4	233812	240737	-	626	protein_coding	si:cabz01085950.1 [Source:ZFIN;Acc:ZDB-GENE-161017-134]	-
ENSDARG00000056407	5.69511	7.71185	2.85469	4.34401	13.5306	7.54362	18.3438	10.5277	irf8	18	30567945	30573849	+	1767	protein_coding	interferon regulatory factor 8 [Source:ZFIN;Acc:ZDB-GENE-040718-367]	IRF
ENSDARG00000058208	0.308288	0.338976	0.441136	1.07512	3.92094	1.28354	1.35938	1.43554	slc25a26	11	16216909	16324575	+	1608	protein_coding	solute carrier family 25 (S-adenosylmethionine carrier), member 26 [Source:ZFIN;Acc:ZDB-GENE-050913-126]	Mito_carr
ENSDARG00000086819	0.202515	0.0397632	0.16099	0.0302679	0.00910773	0.012547	0	0	scn1a	9	49906037	50001606	-	6854	protein_coding	sodium channel, voltage-gated, type I, alpha [Source:ZFIN;Acc:ZDB-GENE-040426-751]	Ion_trans
ENSDARG00000078842	6.10084	6.86532	8.65349	8.09657	9.99877	19.2581	10.8734	42.6119	tns1a	6	20764848	20875111	-	9190	protein_coding	tensin 1a [Source:ZFIN;Acc:ZDB-GENE-120215-32]	C1_1
ENSDARG00000055075	0.572478	0.646802	0.879336	0.832422	1.57008	1.05203	1.26521	5.91351	svila	12	23812530	23935333	+	10218	protein_coding	supervillin a [Source:ZFIN;Acc:ZDB-GENE-990706-5]	-
ENSDARG00000069795	0.150808	0.177664	0.34253	0.180318	0.868136	0.48586	0.65141	0.649123	zgc:154058	13	18545819	18624235	+	2301	protein_coding	zgc:154058 [Source:ZFIN;Acc:ZDB-GENE-060929-48]	-
ENSDARG00000098451	1.49397	1.21335	1.34959	1.18411	2.73641	2.94511	2.0105	3.25511	tmem56a	24	31098534	31140356	-	1460	protein_coding	transmembrane protein 56a [Source:ZFIN;Acc:ZDB-GENE-090402-1]	LAG1
ENSDARG00000088612	1.37486	1.60442	0.866113	1.51982	5.45519	2.47506	7.1572	1.42109	si:ch211-153b23.7	14	11509638	11529311	-	1911	protein_coding	si:ch211-153b23.7 [Source:ZFIN;Acc:ZDB-GENE-141216-14]	-
ENSDARG00000099269	5.11538	3.00404	3.91863	4.73555	7.02714	8.47065	6.8547	12.1009	si:dkeyp-115e12.7	14	8815868	8816933	-	1066	protein_coding	si:dkeyp-115e12.7 [Source:ZFIN;Acc:ZDB-GENE-141216-398]	-
ENSDARG00000096927	0.19042	0	1.08486	2.52347	0.119893	0.0825838	0.0399833	0	si:ch211-210b2.3	15	656069	660289	-	3124	protein_coding	si:ch211-210b2.3 [Source:ZFIN;Acc:ZDB-GENE-131122-13]	-
ENSDARG00000059093	9.78962	7.56344	5.67602	15.4721	4.35481	3.66116	3.3629	5.8708	ank1a	5	68899473	69041102	-	7540	protein_coding	ankyrin 1, erythrocytic a [Source:ZFIN;Acc:ZDB-GENE-041010-44]	Death
ENSDARG00000015752	2.47863	2.32396	1.71074	1.63499	6.72635	4.16653	8.08512	2.05256	zap70	8	20393250	20414364	+	2580	protein_coding	zeta chain of T cell receptor associated protein kinase 70 [Source:ZFIN;Acc:ZDB-GENE-050522-257]	Pkinase_Tyr
ENSDARG00000074663	1.4328	1.66742	2.66046	1.86739	2.96318	3.53786	3.41257	4.66939	SAMD8	17	20569806	20590238	+	4740	protein_coding	zgc:162183 [Source:ZFIN;Acc:ZDB-GENE-070410-30]	SAM_1
ENSDARG00000043475	5.26019	5.72301	3.91406	5.23167	9.37274	6.42268	11.1945	8.63965	TAGAP	20	13647987	13673566	-	5155	protein_coding	si:ch211-122h15.4 [Source:ZFIN;Acc:ZDB-GENE-121214-340]	RhoGAP
ENSDARG00000102003	0.0862734	0.166007	0.0274334	0.120348	0.499743	0.239463	0.391288	0.567148	CU695215.2	19	47502581	47523302	+	2873	protein_coding	-	FH2
ENSDARG00000018411	3.30246	3.80295	2.89494	3.11271	3.95632	7.37031	7.78144	5.86754	mknk1	11	13176568	13189751	+	2777	protein_coding	MAP kinase interacting serine/threonine kinase 1 [Source:ZFIN;Acc:ZDB-GENE-080220-11]	Pkinase
ENSDARG00000020795	1.37929	1.25312	1.00356	1.40228	0.691806	0.58805	0.589049	0.800429	rac3b	12	3022882	3042029	+	4241	protein_coding	Rac family small GTPase 3b [Source:ZFIN;Acc:ZDB-GENE-080220-21]	Ras
ENSDARG00000042722	0.535616	0.387456	0.358561	0.452231	1.10046	0.562393	2.73469	1.00381	blnk	13	50518815	50567658	-	3517	protein_coding	B cell linker [Source:ZFIN;Acc:ZDB-GENE-040702-4]	SH2
ENSDARG00000108038	2.72183	3.12116	2.35578	2.35899	4.19813	4.58205	9.23214	4.32323	CABZ01109481.1	14	1524220	1535430	-	3078	protein_coding	-	Ded_cyto
ENSDARG00000039881	2.75534	2.47819	1.83669	2.82008	1.10086	1.50302	1.56356	1.43246	cemip	7	11197022	11342611	+	6351	protein_coding	cell migration inducing protein, hyaluronan binding [Source:ZFIN;Acc:ZDB-GENE-130103-7]	-
ENSDARG00000043843	22.3713	18.2856	9.56573	21.2775	8.32325	6.61517	4.37711	10.9092	akap7	20	2460864	2479450	+	585	protein_coding	A kinase (PRKA) anchor protein 7 [Source:ZFIN;Acc:ZDB-GENE-040724-128]	-
ENSDARG00000097539	3.32834	7.8337	3.64897	2.07901	29.7222	15.9175	18.9923	2.42589	si:ch211-39f2.3	12	38878830	38913459	+	10411	protein_coding	si:ch211-39f2.3 [Source:ZFIN;Acc:ZDB-GENE-131126-52]	Zona_pellucida
ENSDARG00000015937	1.82569	1.4289	1.3304	2.44066	3.48044	3.43109	3.64181	3.05603	kptn	5	36913423	36924509	-	1955	protein_coding	kaptin (actin binding protein) [Source:ZFIN;Acc:ZDB-GENE-040801-258]	-
ENSDARG00000092381	0.704944	0.830483	0.440314	0.561926	1.96562	1.17924	7.6759	0.689613	si:dkey-23c22.9	8	22404981	22476458	+	1969	protein_coding	si:dkey-23c22.9 [Source:ZFIN;Acc:ZDB-GENE-081105-36]	-
ENSDARG00000100052	7.99559	19.5611	23.5178	11.042	5.8397	7.62879	4.83514	7.00825	CABZ01101977.1	KN150698.1	2793	8412	+	620	protein_coding	-	Gastrin
ENSDARG00000075264	0.378714	0.333664	0.447732	0.501199	0.635861	1.22974	0.611694	3.16521	FAM124A	9	23859317	23885220	-	5105	protein_coding	si:dkeyp-74a11.1 [Source:ZFIN;Acc:ZDB-GENE-081104-474]	-
ENSDARG00000090844	0.316758	0.707464	0.299023	0.179508	1.00966	0.704051	1.55885	1.0032	CABZ01054965.1	9	52971097	52999318	-	5008	protein_coding	-	TIR
ENSDARG00000074322	1.10608	0.725567	0.439644	0.701338	1.45615	1.04662	2.91367	3.85596	si:ch211-147m6.2	25	13191391	13194926	+	1972	protein_coding	si:ch211-147m6.2 [Source:ZFIN;Acc:ZDB-GENE-131121-85]	-
ENSDARG00000024488	1.47671	2.25105	1.52254	0.724104	6.91977	3.63303	5.69403	1.49537	top2a	12	10706772	10740236	+	5539	protein_coding	DNA topoisomerase II alpha [Source:ZFIN;Acc:ZDB-GENE-030131-2453]	DNA_gyraseB
ENSDARG00000026505	3.4606	3.41637	2.66724	2.58523	12.2548	8.0451	9.98112	2.30959	si:ch211-285c6.3	7	3483334	3510563	+	5644	protein_coding	si:ch211-285c6.3 [Source:ZFIN;Acc:ZDB-GENE-040724-148]	Pkinase
ENSDARG00000106631	2.22222	1.5663	1.67598	3.89477	1.14804	0.543661	0.861433	0.936447	tmem63bb	11	43470176	43473824	-	1740	protein_coding	transmembrane protein 63Bb [Source:NCBI gene;Acc:569678]	-
ENSDARG00000057433	0.979595	2.94079	2.25423	2.84088	1.00632	0.760246	0.649547	0.988553	st6galnac5b	8	17800380	17822259	-	1923	protein_coding	ST6 (alpha-N-acetyl-neuraminyl-2,3-beta-galactosyl-1,3)-N-acetylgalactosaminide alpha-2,6-sialyltransferase 5b [Source:ZFIN;Acc:ZDB-GENE-040912-25]	Glyco_transf_29
ENSDARG00000092191	0	0.165979	0.192001	0	1.44466	0.314241	5.62922	0	CR318588.1	18	7584386	7587290	+	821	processed_transcript	-	-
ENSDARG00000074533	6.6585	5.71778	4.1385	5.59246	3.26316	3.42699	2.70839	3.62857	slc25a38b	6	7721292	7735153	-	4266	protein_coding	solute carrier family 25, member 38b [Source:ZFIN;Acc:ZDB-GENE-110214-1]	Mito_carr
ENSDARG00000087393	0.287909	1.15116	0.45775	0.182555	3.75733	1.31675	3.26449	0.716921	prr11	10	35250205	35257561	-	1894	protein_coding	proline rich 11 [Source:ZFIN;Acc:ZDB-GENE-091118-97]	-
ENSDARG00000074806	0.283003	0.032414	0.0374958	0.477024	0	0	0.0148558	0.0322989	afap1l2	12	30233977	30308351	+	4204	protein_coding	actin filament associated protein 1-like 2 [Source:ZFIN;Acc:ZDB-GENE-100318-1]	PH
ENSDARG00000051746	1.65641	1.45375	1.68167	2.25496	2.73924	2.66578	3.99765	5.30238	ada2a	25	16689633	16700924	+	2484	protein_coding	adenosine deaminase 2a [Source:ZFIN;Acc:ZDB-GENE-030902-4]	-
ENSDARG00000093612	0.1471	0.606536	0.187101	0.410397	1.55598	1.12281	2.66865	0.402922	si:dkey-92i17.2	14	10607446	10617993	-	1685	protein_coding	si:dkey-92i17.2 [Source:ZFIN;Acc:ZDB-GENE-030131-6759]	-
ENSDARG00000078560	0.16422	0.135426	0.174064	0.167993	0.137863	0.303877	1.3379	1.07956	slc9a5	7	34620418	34653251	+	4528	protein_coding	solute carrier family 9, subfamily A (NHE5, cation proton antiporter 5), member 5 [Source:ZFIN;Acc:ZDB-GENE-080225-43]	Na_H_Exchanger
ENSDARG00000010244	77.225	106.66	130.893	73.6332	168.237	164.127	199.107	155.281	rpl22l1	24	26475182	26479841	-	787	protein_coding	ribosomal protein L22-like 1 [Source:ZFIN;Acc:ZDB-GENE-060804-3]	-
ENSDARG00000006514	2.03061	2.17073	3.22849	4.4063	0.608821	1.34196	0.446679	1.67744	her6	6	36551083	36552844	-	1538	protein_coding	hairy-related 6 [Source:ZFIN;Acc:ZDB-GENE-980526-144]	Hairy_orange
ENSDARG00000014717	5.67347	4.13052	5.03114	6.84337	2.67617	3.91413	2.70103	2.92341	dync1h1	17	918005	945883	-	5295	protein_coding	dynein, cytoplasmic 1, heavy chain 1 [Source:ZFIN;Acc:ZDB-GENE-030131-7050]	-
ENSDARG00000044491	0.34554	0.661497	0.156965	0.137719	2.84383	1.26309	1.61693	0.236618	kif20a	21	34879268	34926738	-	4017	protein_coding	kinesin family member 20A [Source:ZFIN;Acc:ZDB-GENE-050522-252]	Kinesin
ENSDARG00000027222	0.944022	0.981031	0.713849	0.610259	2.20356	1.65763	3.50995	0.914482	adgrg1	7	28668979	28696556	-	4306	protein_coding	adhesion G protein-coupled receptor G1 [Source:ZFIN;Acc:ZDB-GENE-030131-3671]	7tm_2
ENSDARG00000024588	1.95948	3.06465	4.15388	3.26752	0.538875	0.82051	0.510754	2.28262	gpc5b	22	15438513	15501417	+	2201	protein_coding	glypican 5b [Source:ZFIN;Acc:ZDB-GENE-060503-64]	-
ENSDARG00000102950	1.14922	0.889441	1.06437	1.33853	0.660353	0.522603	0.534155	0.580669	si:ch211-241b2.1	21	2302156	2310355	-	4443	protein_coding	si:ch211-241b2.1 [Source:ZFIN;Acc:ZDB-GENE-070705-131]	zf-C2H2
ENSDARG00000073743	3.16825	1.40805	1.1462	2.64646	1.1945	0.526581	0.717037	0.415721	slc25a37	8	50190742	50217915	+	2613	protein_coding	solute carrier family 25 (mitochondrial iron transporter), member 37 [Source:ZFIN;Acc:ZDB-GENE-031118-202]	Mito_carr
ENSDARG00000076055	0.253906	0.29314	0.226066	0.325854	0.0639463	0.0528563	0	0.139095	rpgrip1	24	7748751	7777389	-	4881	protein_coding	RPGR interacting protein 1 [Source:ZFIN;Acc:ZDB-GENE-091204-394]	-
ENSDARG00000057035	0.664847	1.37068	1.18918	0.753542	2.61628	1.51378	3.29807	2.73163	stoml3b	10	24641229	24648231	-	1193	protein_coding	stomatin (EPB72)-like 3b [Source:ZFIN;Acc:ZDB-GENE-050417-366]	-
ENSDARG00000086762	1.40186	2.05964	2.15198	2.46128	0.70003	0.377365	1.06577	1.12547	gsdmea	19	20037857	20054565	+	2051	protein_coding	gasdermin Ea [Source:ZFIN;Acc:ZDB-GENE-120215-186]	-
ENSDARG00000114676	6.03493	6.3197	9.13812	11.0242	13.9324	26.4223	11.7667	27.5505	BX908797.1	3	42918143	42968544	-	345	protein_coding	-	-
ENSDARG00000045003	0.0472121	0.584008	0.300252	0.0987885	1.63492	1.10568	0.20818	3.94422	plvapb	11	6043742	6048490	-	2100	protein_coding	plasmalemma vesicle associated protein b [Source:ZFIN;Acc:ZDB-GENE-060616-96]	-
ENSDARG00000002840	2.30004	1.64881	2.35187	1.35888	0.704205	1.1266	0.738629	1.2106	si:dkey-28b4.8	1	44651727	44704261	-	5496	protein_coding	si:dkey-28b4.8 [Source:ZFIN;Acc:ZDB-GENE-090501-2]	E1-E2_ATPase
ENSDARG00000040920	0.72703	0.55514	0.684986	0.544652	0.322125	0.30363	0.186581	0.18439	si:dkey-49n23.1	22	30811775	30935510	-	3682	protein_coding	si:dkey-49n23.1 [Source:ZFIN;Acc:ZDB-GENE-050208-762]	Sema
ENSDARG00000098699	0	0.0417489	0	0	0.650254	0.158083	0.612293	0	si:ch211-11c3.9	11	36665359	36674376	+	1632	protein_coding	si:ch211-11c3.9 [Source:ZFIN;Acc:ZDB-GENE-141216-426]	-
ENSDARG00000094753	3.05063	1.82059	5.23314	4.75945	4.39751	15.1801	9.96228	10.9947	si:dkey-71d15.2	21	34929598	34943930	+	1235	protein_coding	si:dkey-71d15.2 [Source:ZFIN;Acc:ZDB-GENE-050309-272]	-
ENSDARG00000088571	0.380853	0.254654	0.490965	0.35897	0.142581	0.0892829	0.051872	0.197362	soga3a	16	5196226	5231397	+	4816	protein_coding	SOGA family member 3a [Source:ZFIN;Acc:ZDB-GENE-100921-84]	-
ENSDARG00000028346	7.8091	5.92987	6.27649	7.3726	14.4244	10.4035	15.165	8.80415	tesca	5	11840905	11864424	+	2298	protein_coding	tescalcin a [Source:ZFIN;Acc:ZDB-GENE-040426-2632]	-
ENSDARG00000091834	0.338901	0.128094	0.175117	0.177282	0.800176	0.470332	0.533703	0.394521	si:ch211-198m17.1	3	38705425	38745598	-	5851	protein_coding	si:ch211-198m17.1 [Source:ZFIN;Acc:ZDB-GENE-131127-451]	-
ENSDARG00000053535	0.0604545	0.0415453	0.0961174	0.137039	0.152255	0.380171	0.152327	0.827956	lmo7b	1	34365845	34450784	-	6560	protein_coding	LIM domain 7b [Source:ZFIN;Acc:ZDB-GENE-060825-242]	CH
ENSDARG00000031845	2.15747	2.11164	1.63713	1.55039	4.48682	3.28905	3.70646	2.4623	mboat2a	17	34969123	35076730	-	3033	protein_coding	membrane bound O-acyltransferase domain containing 2a [Source:ZFIN;Acc:ZDB-GENE-041210-257]	MBOAT
ENSDARG00000031422	1.14904	1.29726	1.04392	0.629695	0	0.355949	0.206801	0.337214	igfbp2b	9	46745348	46799620	+	1208	protein_coding	insulin-like growth factor binding protein 2b [Source:ZFIN;Acc:ZDB-GENE-090107-3]	-
ENSDARG00000017565	1.45908	1.03984	1.60382	1.55793	3.40249	3.21865	7.05784	1.48021	itk	14	34045284	34074510	-	2752	protein_coding	IL2 inducible T cell kinase [Source:ZFIN;Acc:ZDB-GENE-990415-261]	-
ENSDARG00000025576	5.15644	4.22797	4.48619	4.1059	7.05061	6.83371	6.09204	7.36511	mkln1	4	11690923	11730768	+	4480	protein_coding	muskelin 1, intracellular mediator containing kelch motifs [Source:ZFIN;Acc:ZDB-GENE-030131-3942]	-
ENSDARG00000078620	0.278118	0.568216	0.250969	0.39845	1.08852	0.899744	1.61935	0.43237	si:dkey-156m2.3	1	57966831	57980061	+	6595	protein_coding	si:dkey-156m2.3 [Source:ZFIN;Acc:ZDB-GENE-121213-8]	NACHT
ENSDARG00000096726	0.504343	0.086648	0.267287	0.0879423	2.43453	0.656189	2.38273	0.172681	si:ch211-250m6.2	4	77675291	77680276	-	2359	protein_coding	si:ch211-250m6.2 [Source:ZFIN;Acc:ZDB-GENE-061009-20]	HSP70
ENSDARG00000098949	0.138786	0.23844	1.72389	1.36731	0.0655374	0.180572	0.152993	0.261353	mslna	3	43835558	43872889	-	5715	protein_coding	mesothelin a [Source:ZFIN;Acc:ZDB-GENE-120727-9]	-
ENSDARG00000102274	5.51829	6.69965	7.55505	5.00357	9.26522	9.62616	11.6642	11.0845	aaas	9	205248	216527	-	1617	protein_coding	achalasia, adrenocortical insufficiency, alacrimia [Source:ZFIN;Acc:ZDB-GENE-030912-4]	-
ENSDARG00000088807	0.832571	0.791482	0.628765	0.735556	1.93083	1.44432	1.48596	0.893196	klhl22	8	51707781	51726631	+	7145	protein_coding	kelch-like family member 22 [Source:ZFIN;Acc:ZDB-GENE-081104-154]	BTB
ENSDARG00000068096	5.24163	2.5667	1.48455	8.6736	1.92404	1.47256	1.20309	1.10441	atf5a	5	30414250	30418636	-	2336	protein_coding	activating transcription factor 5a [Source:ZFIN;Acc:ZDB-GENE-060526-205]	bZIP_1
ENSDARG00000008434	32.0711	23.9617	15.7776	33.3805	16.1883	12.5592	14.4059	9.01937	bcl2l1	23	18953870	18982499	-	2198	protein_coding	bcl2-like 1 [Source:ZFIN;Acc:ZDB-GENE-010730-1]	-
ENSDARG00000089933	3.31915	2.23761	2.28744	2.04217	5.19674	3.52484	11.3683	4.14821	rasal3	6	8470598	8489810	-	3928	protein_coding	RAS protein activator like 3 [Source:ZFIN;Acc:ZDB-GENE-101130-3]	-
ENSDARG00000103546	3.12114	3.28497	4.42587	5.02068	1.59336	1.75604	1.87751	2.77269	purbb	10	44979533	44981295	-	1763	protein_coding	purine-rich element binding protein Bb [Source:ZFIN;Acc:ZDB-GENE-040426-1478]	-
ENSDARG00000001785	1.01316	0.696262	0.460241	0.56533	0.154922	0.238533	0.437633	0.138758	irx2a	16	555746	563732	-	6850	protein_coding	iroquois homeobox 2a [Source:ZFIN;Acc:ZDB-GENE-040426-1446]	Coprinus_mating
ENSDARG00000105033	1.04378	1.12856	0.531047	1.14541	2.19064	1.73829	6.01395	1.48669	BX897691.1	1	34954697	35113974	-	3562	protein_coding	-	-
ENSDARG00000026417	0.194403	0.267193	0.154542	0	0.489603	0.421555	1.22459	2.12996	ccr12b.2	24	264839	265858	+	1020	protein_coding	chemokine (C-C motif) receptor 12b, tandem duplicate 2 [Source:ZFIN;Acc:ZDB-GENE-070301-2]	7tm_1
ENSDARG00000102889	5.71121	6.04847	7.53693	3.81419	1.44652	3.00317	2.16061	3.85551	2022-09-15	25	12853111	12906901	-	3064	protein_coding	septin 15 [Source:ZFIN;Acc:ZDB-GENE-061103-265]	GTP_CDC
ENSDARG00000043004	0.0557832	0.0255567	0.147817	0.0518769	0.725865	0.161285	0.866765	0.101864	si:dkeyp-117h8.4	20	25639470	25645150	-	2666	protein_coding	si:dkeyp-117h8.4 [Source:ZFIN;Acc:ZDB-GENE-030804-4]	-
ENSDARG00000096242	14.7609	17.0707	13.0787	15.7404	10.086	3.33286	8.57378	3.59474	si:ch211-76l23.4	3	28822065	28828569	-	3664	protein_coding	si:ch211-76l23.4 [Source:ZFIN;Acc:ZDB-GENE-030131-8310]	-
ENSDARG00000036558	7.24791	5.9978	7.52632	5.72931	2.95675	3.74584	3.63347	5.14932	col18a1a	9	41821613	41979505	+	6566	protein_coding	collagen type XVIII alpha 1 chain a [Source:ZFIN;Acc:ZDB-GENE-030516-3]	Collagen
ENSDARG00000071446	0	0	1.51987	1.14301	2.57952	2.36907	92.7346	11.97	zgc:153659	24	39695688	39697327	+	363	protein_coding	zgc:153659 [Source:ZFIN;Acc:ZDB-GENE-060825-311]	C1-set
ENSDARG00000076241	47.0571	94.6663	195.28	158.252	208.621	348.353	168.484	1228.58	txlnbb	17	6358160	6382392	-	1813	protein_coding	taxilin beta b [Source:ZFIN;Acc:ZDB-GENE-070424-77]	-
ENSDARG00000104581	5.54965	4.31374	4.06474	6.03086	3.03616	2.48797	3.22089	2.67584	tom1	3	25907266	25939259	+	2385	protein_coding	target of myb1 membrane trafficking protein [Source:ZFIN;Acc:ZDB-GENE-060721-1]	-
ENSDARG00000078227	1.10457	1.14342	1.71171	1.81389	0.193673	0.448723	0.431567	1.03404	cspg4	25	6507141	6629281	-	7091	protein_coding	chondroitin sulfate proteoglycan 4 [Source:ZFIN;Acc:ZDB-GENE-050519-1]	Laminin_G_2
ENSDARG00000061222	5.49366	7.98665	5.63956	6.19511	20.3542	11.1061	11.9167	8.13603	uba7	6	52947186	53036902	+	3438	protein_coding	ubiquitin-like modifier activating enzyme 7 [Source:ZFIN;Acc:ZDB-GENE-121120-4]	-
ENSDARG00000005115	4.9349	7.02858	6.73197	4.55467	3.39814	3.75026	3.43731	2.73611	calub	18	7015283	7032227	-	3325	protein_coding	calumenin b [Source:ZFIN;Acc:ZDB-GENE-040426-1251]	-
ENSDARG00000111945	3.38869	2.59285	1.55522	4.43469	1.27576	1.63631	0.616177	0.765524	CABZ01069040.1	12	3652015	3705862	-	1419	protein_coding	-	Pkinase
ENSDARG00000011076	3.72127	5.95489	7.98728	7.67531	3.74881	2.21333	3.48268	2.32982	zgc:91968	19	4990320	4999232	+	1865	protein_coding	zgc:91968 [Source:ZFIN;Acc:ZDB-GENE-040704-1]	-
ENSDARG00000036292	0.36317	0.041596	0	0	1.10519	0.315008	2.89774	0.414483	cdx4	14	32961718	32965169	-	1638	protein_coding	caudal type homeobox 4 [Source:ZFIN;Acc:ZDB-GENE-980526-330]	Caudal_act
ENSDARG00000098857	1.00822	0.951642	1.35191	1.35559	0.581261	0.695396	0.520322	0.598904	lifra	5	8417184	8483537	-	4081	protein_coding	leukemia inhibitory factor receptor alpha a [Source:ZFIN;Acc:ZDB-GENE-050327-16]	-
ENSDARG00000098099	0.164858	0.725073	0.0262109	0.045994	0	0	0	0.0451562	zgc:64065	6	9155252	9161393	+	3007	protein_coding	zgc:64065 [Source:ZFIN;Acc:ZDB-GENE-040426-1355]	PI-PLC-X
ENSDARG00000051712	7.90477	7.82844	9.74443	5.34727	0.354529	1.27737	4.20179	2.84739	mhc1lfa	25	10947743	10951126	+	2289	protein_coding	major histocompatibility complex class I LFA [Source:ZFIN;Acc:ZDB-GENE-140820-7]	C1-set
