# Supplementary material for: Dynamic regulation of inter-organelle communication by ubiquitylation controls skeletal muscle development and disease onset
Source: eLife. 2023 Jul 11;12:e81966. doi: 10.7554/eLife.81966 (PMC10356137; doi:10.7554/eLife.81966)
Supplement: Supplementary file 4. [file elife-81966-supp4.xlsx]

## Sheet: Proteome
Cluster name	Pathway ids	Enriched 1.5mo down	Enriched 1.5mo up	Enriched 4mo down	Enriched 4mo up	Genes
Nucleotide Metabolism	GO:0019637,GO:0009150,GO:0009199,GO:0006812,GO:0098660,GO:0098655,GO:0009165,GO:1901135,GO:0034220,GO:1902600,GO:0033178,GO:0045259,GO:0015986,GO:0015985,GO:0033177,GO:0019693,GO:0045261,GO:0045263,GO:0016469,GO:0000276,GO:0009259,GO:0098662,GO:0009117,GO:0072521,GO:0006163,GO:0006164,GO:0072522,GO:0005753,GO:0009141,GO:0009260,GO:0046390,GO:0055085,GO:0055086,GO:0009145,GO:0009144,GO:1901293,GO:…	FALSE	TRUE	FALSE	TRUE	ENTPD5B|PRKAG3B|UGP2A|LPGAT1|POGLUT1|MPI|NDUFA10|SLC25A3B|ENO2|CAMK2G1|ENO3|KLHL31|DEPTOR|ATP1B3B|RPS6KA1|ATP5MEA|B2M|KCNH2|PDHX|AAK1B|CACNB1|ATP5FA1|GPD2|AQP3B|AQP3A|VDAC3|VDAC2|NNT2|VDAC1|CLDNB|AMPD2B|CETP|PHACTR4A|AK1|MAP2K4A|GMPR|MTM1|ATP5L|FXR1|MAN2A1|PGK1|DUSP23B|CYC1|NDUFV2|SI:CH211-140M22.7|NDUFV1|GCN1|HEXIM1|CASQ1B|TNIKB|CAV1|ALPK3B|ALPK3A|MOB4|PTPRD|ALDH6A1|ADSS1|ADA|CD40|PPP1R11|PRKAR1…
Mitochondria Respiration	GO:0006120,GO:0042773,GO:0042775,GO:0006119,KEGG:01100,GO:0005740,GO:0005743,GO:0005739,GO:0055114,GO:0045333,GO:0022904,GO:0022900,GO:0098796,GO:0045271,KEGG:00190,GO:1990204,GO:1902494,GO:0006091,GO:0098798,GO:0031975,GO:0070469,GO:0019866,GO:0046034,GO:0005747,GO:0005746,GO:0015980,GO:0031090,GO:0030964,GO:0016020,GO:0031967,GO:0031966,GO:0098800,GO:0098803	TRUE	TRUE	FALSE	TRUE	PAFAH1B1B|UGP2A|LPGAT1|AGLA|ECI1|ABAT|TXNDC12|ENO2|OXCT1A|OXCT1B|GBA2|ENO3|PSMD6|PSMD7|ATP1B3B|BX548005.1|PSMD3|DAG1|PSMD1|B2M|XYLB|MCCC2|PDHX|MECR|ENDOG|MRPS18B|HIBADHB|HSPG2|ASRGL1|DYNC1I2B|PYURF|ATP5FA1|ZGC:101744|ZFYVE19|VDAC3|PCXA|VDAC2|PSME2|MT-CO2|NNT2|SUCLG1|VDAC1|LAP3|NAA15B|AMPD2B|ALDH7A1|NLRX1|RPN2|SHMT1|RPN1|CYLDA|GSTR|ARVCFB|PLA2G7|HACD2|ATP5L|TOX4B|APOM|NEU1|INPP5E|PCYT1AA|PLCD3A|CO…
Muscle Fibers	GO:0006941,GO:0006942,GO:0090257,GO:0006936,GO:0006937,GO:0033018,GO:0043292,GO:0005865,GO:0031674,GO:0005861,GO:0030239,GO:0010927,GO:0030018,GO:0044057,GO:0030017,GO:0030016,GO:0003012,GO:0036379	FALSE	TRUE	TRUE	TRUE	OBSCNB|SYNPO2B|TNNI4A|HSPB1|NEXN|ILK|ATP2A1|MYOM1B|FHL5|FHOD3A|MTM1|SYNPO2LB|TNNT2D|SPEGB|GRK5|TNNT2B|TTN.1|MYOZ2B|DESMA|ANXA6|BIN1B|SMYD1A|SMYD1B|CASQ1B|PDLIM5B|TMOD4|FHL2B|TNNT3B|MYOM2A|PARVB|CABZ01061524.1|CACNB1|TNNT1|TNNI2A.4|MYOZ3A|ANK2B|TNNI2A.3|TNNI2A.2|CASQ2|MYOZ1B|VDAC2|ACTR10|MYH6|LIMS1|CABZ01078594.1
Muscle Development	GO:0051146,GO:0014706,GO:0061061,GO:0055001,GO:0048741,GO:0055002,GO:0060537,GO:0048747,GO:0060538,GO:0045214,GO:0007517,GO:0014904,GO:0007519,GO:0042692	FALSE	TRUE	FALSE	FALSE	OBSCNB|NDRG4|LAMA4|NEXN|ILK|VCLA|MTM1|FXR1|SGCD|SYNPO2LB|TNNT2D|TTN.2|DESMA|DAG1|FLNCB|KLHL41B|SMYD1B|UNC45A|MYBPC1|KLHL41A|PDLIM5B|LAMB2|CAV1|PGAM2|ALPK3B|PLECA|HSPG2|TNNT1|KLHL40B
Nucleosome	GO:0006333,GO:0065004,GO:0034728,GO:0044815,GO:0006334,GO:0006323,GO:0000786,GO:0031497,GO:0071824,GO:0016584	FALSE	TRUE	FALSE	TRUE	ZGC:110425|H2AX|SETB|HP1BP3|SMARCA5|NAP1L4B|HISTH1L|H1-0|H1-10|SI:DKEY-108K21.21|PSMC5|SI:CH211-161H7.4|PSMC3|TTN.2|SI:DKEY-23A13.17|PSMC2
Carbon Metabolism	KEGG:01200,GO:0009179,KEGG:00010,KEGG:01230,GO:0046031,KEGG:01210,GO:0006090,GO:0009135,GO:0009185	FALSE	TRUE	FALSE	TRUE	ECHS1|AK1|GLULA|PDHB|ENO2|ENO3|ACAT1|ME1|PGK1|ME3|DLAT|HIBCH|IDH3A|OGDHA|PFKMA|PDHX|PKLR|GOT1|MDH2|IDH2|PGAM2|ALDH9A1B|ALDOAA|SDHA|DLDH|ALDOAB|SDHB|GCK|ALDOCB|CS|GOT2B|ALDH6A1|SUCLA2|PKMB|PCCB|SUCLG1|GAPDH|FBP1A|ALDH7A1|BCAT2
Amino Acid and Lipid Metabolism	KEGG:00071,KEGG:00650,KEGG:00310,KEGG:00410,KEGG:00380,KEGG:00640,KEGG:00280,KEGG:00062,KEGG:00072	FALSE	TRUE	FALSE	TRUE	ECHS1|ACAA2|ECI1|ECI2|OXCT1A|HADHAB|ACAT1|DHTKD1|HMGCL|AUH|HADH|SMYD1B|AASS|HIBCH|MCCC2|EHMT1A|MECR|BCKDHB|ALDH9A1B|DLDH|HIBADHB|ACSL1B|HADHB|ALDH6A1|SUCLA2|EHHADH|PCCB|KYAT1|SUCLG1|SMYD2A|ALDH7A1|BCAT2
Proteasome	GO:0022624,GO:1905369,GO:1905368,GO:0000502,KEGG:03050,GO:0010498,GO:0005838	FALSE	TRUE	FALSE	FALSE	PSMD12|PSMD14|RAD23AB|LTN1|SI:RP71-45K5.4|UBE2G1B|PSMC5|PSMD6|PSMA3|PSMB4|PSMD7|PSMA4|PSMC3|PSMB2|PSMC2|PSMD3|PSMB1|PSME2|PSMD1|PSMD11B|PSMA6A|SDF2|PSMD4A
Actin Cytoskeleton	GO:0043232,GO:0005856,GO:0099080,GO:0099081,GO:0043228,GO:0015629,GO:0099512	FALSE	TRUE	TRUE	TRUE	MDC1|COL5A2B|KRT1-19D|MYHC4|ZGC:172323|SMCHD1|SI:DKEY-40C11.2|DYNC2H1|INAB|TMOD4|CLIP1A|NEFMA|MYOM2A|SI:DKEY-222N6.2|CABZ01061524.1|NEFMB|SI:CH211-161H7.4|MYOZ3A|TPMA|TIMELESS|SMARCA4A|ZGC:65851|VIMR2|BACH1A|FHOD3A|MYOM1B|PPL|NEFLB|MTM1|NEFLA|FXR1|G3BP1|MYOZ2B|MAP6A|PRPH|CASQ1B|DNAH10|FHL2B|PARVB|SMARCA1|PLECA|AIF1L|GFAP|FYBB|CNOT2|TUBA8L4|MYOZ1B|EVPLA|MYHA|EVPLB|ILK|ATP2A1|FHL5|LMNB2|MAP4L|LMNB1…
Membrane-bound Organelle	GO:0043229,GO:0043227,KEGG:00000,GO:0032991,GO:0043231	TRUE	TRUE	FALSE	TRUE	NCKAP1|COL5A2B|AGLA|ABAT|HNRNPR|OXCT1A|ENO2|OXCT1B|ENO3|GPATCH8|PSMD9|PSMD6|PSMD7|PSMD3|PSMD1|XYLB|NUP214|VPS18|MECR|ENDOG|COL5A3B|INAB|NUP210|HISTH1L|HCFC2|HSPG2|MYL4|ATP5FA1|DAAM2|ZFYVE19|PSME2|PCXA|RPL24|NNT2|PPP2R1BA|MT-CO2|TARS3|CLDNB|UBA52|SI:CH73-237C6.1|NLRX1|RPN2|SHMT1|RPN1|XPC|GSTR|ARVCFB|PLA2G7|HACD2|TOX4B|PRDX1|SSR1|PSMF1|COMTA|VTI1B|PRPF38B|CASQ1B|NAPSA|SNAPIN|DNAH10|HOMER2|FHL2B|SNF…
Electron Transport Chain	GO:0045277,GO:0006123,GO:0005751,GO:0070069,GO:0019646	FALSE	FALSE	FALSE	TRUE	UQCRB|COX4I1|UQCRFS1|UQCR10|COX5AB|NDUFA4L|COX6B2|COA6|COX5AA|COX6B1|COX5B2
Blood Circulation	GO:0003015,GO:0060047,GO:0008015,GO:0003013	FALSE	TRUE	FALSE	FALSE	UNC45A|TNNI4A|ILK|VCLA|PARVB|DLDH|CRIP1|SGCD|TTN.2|ANK2B|CASQ2|DESMA|VDAC2|BIN1B|LIMS2|SMYD1B|LIMS1|OGDHA
TCA	GO:0009060,GO:0006099,KEGG:00020	FALSE	TRUE	FALSE	TRUE	UQCRB|MDH2|COX4I1|IDH2|NDUFS8A|PDHB|SDHA|DLDH|SDHB|DHTKD1|COX5B2|CS|SUCLA2|SUCLG1|DLAT|COX5AB|COX5AA|IDH3A|OGDHA
Intermediate Filaments	GO:0045104,GO:0045103,GO:0001533	FALSE	FALSE	TRUE	FALSE	DSPA|EVPLA|DSPB|EVPLB|PPL
Proton transport	GO:0045265,GO:0000274	FALSE	FALSE	FALSE	TRUE	ATP5PD|ATP5PO
Microtubule Transport	GO:0007018,GO:0072384	FALSE	FALSE	TRUE	FALSE	DYNC2H1|DNAH10|DNAH7|NDE1|FYCO1A|STARD9|MFN2|KIF22|ACTR10|SLC9B2
Muscle Contraction	KEGG:04261,KEGG:04260	FALSE	TRUE	FALSE	TRUE	UQCRB|COX4I1|ATP2A3|ATP2A1|UQCR10|ATP2A1L|CAMK2G1|PPP1CB|TNNT2D|MYL2B|TNNT2B|ATP1B3B|UQCRFS1|CYC1|COX8B|UQCRC2A|CAMK2D2|UQCRC2B|COX6B2|COX6B1|COX5B2|CACNB1|SLC8A3|MYL4|AKT2L|PPP2R2D|CASQ2|PPP2R1BA|MT-CO2|COX5AB|COX5AA

## Sheet: Ubiquitylome
Cluster name	Pathway ids	Enriched 1.5mo down	Enriched 1.5mo up	Enriched 4mo down	Enriched 4mo up	Genes
Ubiquitin Mediated Proteolysis	KEGG:04120	FALSE	FALSE	FALSE	TRUE	UBE2NB|UBE2L3B|UBA7|UBE2D2|UBE3A
Myosin Complex	GO:0016459,GO:0043228,GO:0043232	FALSE	FALSE	TRUE	FALSE	MYHA|MYHB|RPS28|CU633479.4|TTN.2|KRT1-19D|TPMA|MYHC4|MYOM1B|RPL6
Muscle Fibers	GO:0031430,GO:0099080,GO:0099081,GO:0005861,GO:0099512,GO:0006941,GO:0036379,GO:0060048,GO:0030017,GO:0003012,GO:0030016,GO:0005865,GO:0003008,GO:0043292,GO:0006936,GO:0015629,GO:0031672	FALSE	TRUE	FALSE	TRUE	OBSCNB|TNNI1C|MYHA|TMOD4|TPM2|TNNI4B.2|TPM1|MYOM2A|TNNT3B|MYOM1B|MYHC4|CABZ01061524.1|RYR3|LMNB2|CU633479.4|TTN.2|TNNI2B.2|TNNI2A.3|CFL2|LDB3B|DESMA|ANXA6
Peroxisome	KEGG:04146	TRUE	FALSE	FALSE	FALSE	PHYH|AGXTA|HAO1|SCP2A
Sarcomere	GO:0048769,GO:0031033,GO:0031034,GO:0071688	FALSE	FALSE	TRUE	FALSE	TTN.2|TTN.1
Muscle Development	GO:0031032,GO:0051146,GO:0055001,GO:0045214,GO:0055002,GO:0010927,GO:0030239,GO:0061061,GO:0042692	FALSE	FALSE	FALSE	TRUE	OBSCNB|TTN.2|TTN.1|LDB3B|TNNT3B|FLNCB|VCLA
