# Supplementary material for: Dynamic regulation of inter-organelle communication by ubiquitylation controls skeletal muscle development and disease onset
Source: eLife. 2023 Jul 11;12:e81966. doi: 10.7554/eLife.81966 (PMC10356137; doi:10.7554/eLife.81966)
Supplement: Supplementary file 5. [file elife-81966-supp5.xlsx]

## Sheet: Proteome
Protein accession number	Gene	Cluster
F1R7N8	ttn.2	Cluster1
A0A2R8QKW7	A0A2R8QKW7	Cluster1
F1R446	sptan1	Cluster1
F1R445	sptan1	Cluster1
E7F1L7	flnca	Cluster1
F1QL44	flncb	Cluster1
A0A0G2L1F5	sptbn1	Cluster1
F1QQE5	sptb	Cluster1
A0A0R4IZA6	hspg2	Cluster1
F1R0H8	dmd	Cluster1
A0A0R4IIA7	tln2a	Cluster1
A0A2R8QI77	prx	Cluster1
F8W4U4	xirp2a	Cluster1
A0A2R8QBL5	actn2b	Cluster1
A0A140LFP0	obscnb	Cluster1
A0A140LGX4	obscnb	Cluster1
A0A2R8RK22	atp2a1l	Cluster1
Q5U3A4	atp2a1	Cluster1
A0A2R8QJH4	atp2a3	Cluster1
Q503C7	pygma	Cluster1
E7EXT3	pygmb	Cluster1
F1REL9	lamb1b	Cluster1
B7ZDA6	lamb2	Cluster1
Q1LVF0	lamc1	Cluster1
A0A0R4IV67	agla	Cluster1
X1WFS0	obscnb	Cluster1
B8JI08	ogdha	Cluster1
E7FDY6	ehbp1l1b	Cluster1
E7FBE5	cltcl1	Cluster1
F1QP23	eprs1	Cluster1
A0A286Y8X9	eef2b	Cluster1
F1QYU0	lama4	Cluster1
F1R8W4	desma	Cluster1
F1QCR7	nefma	Cluster1
A9JRG7	A9JRG7	Cluster1
F1RAE8	gfap	Cluster1
B0S553	nefmb	Cluster1
Q7SZP4	Q7SZP4	Cluster1
E9QFD5	nefla	Cluster1
Q502Q7	prph	Cluster1
B0R1B8	neflb	Cluster1
F1Q8F1	inab	Cluster1
A0A0R4IHV1	pkmb	Cluster1
A0A0R4IQN8	naca	Cluster1
F1RAG3	nid1a	Cluster1
F1R3X9	spegb	Cluster1
F8W4M7	aco2	Cluster1
F1Q545	mybpc1	Cluster1
A5WWB7	A5WWB7	Cluster1
Q08BA1	atp5fa1	Cluster1
F1QYX8	hadhab	Cluster1
E7EYF3	uba7	Cluster1
B8JIH2	vcla	Cluster1
Q6NW94	mybpha	Cluster1
Q6TH14	eno3	Cluster1
Q6PC12	eno1a	Cluster1
Q6GQM9	eno2	Cluster1
F1RDA6	ndufs1	Cluster1
Q66HV8	pfkma	Cluster1
A0A2R8RKV0	trap1	Cluster1
F5H8N4	lrpprc	Cluster1
A5PMG2	hspa1b	Cluster1
Q6PFS4	immt	Cluster1
E7FCA5	hdlbpb	Cluster1
A0A2R8QE60	xirp1	Cluster1
A0A2R9YJH5	ckmt2a	Cluster1
A8E5J9	ckmt2b	Cluster1
B3DFN3	lmnb2	Cluster1
F1QHC4	lmnb1	Cluster1
Q5TZG5	ezrb	Cluster1
F1R6N3	anxa6	Cluster1
Q803Q7	aldoaa	Cluster1
Q6P043	aldoab	Cluster1
Q8JH70	aldocb	Cluster1
F8W432	ampd3a	Cluster1
B3DJR0	cmya5	Cluster1
A8WGC6	atp5f1b	Cluster1
Q6DGE9	unc45b	Cluster1
Q6NX09	hk1	Cluster1
Q5XJ10	gapdh	Cluster1
Q5MJ86	gapdh-2	Cluster1
R4GDQ0	tpp2	Cluster1
A0A2R8QAA8	pdha1a	Cluster1
F1QK93	psmd1	Cluster1
F1QDA6	acsl1b	Cluster1
B8JK22	acsl1a	Cluster1
F1QXV8	pgk1	Cluster1
F1QPL7	pcca	Cluster1
Q7T334	mdh2	Cluster1
B0S5Q5	atp1a2a	Cluster1
F1QDL1	col1a1b	Cluster1
E9QE31	capn3b	Cluster1
A0A2R8PXK4	synm	Cluster1
Q1LX72	synm	Cluster1
Q6TNT9	gdi2	Cluster1
A0AUR2	srl	Cluster1
A0A0R4IRI3	srl	Cluster1
A0A2R8RYX8	wu:fb80c09	Cluster1
Q6NSN5	adss1	Cluster1
F1QRM9	npepps	Cluster1
F1RCC9	synpo2la	Cluster1
U3JAM7	synpo2lb	Cluster1
Q6PE34	Q6PE34	Cluster1
Q7ZUW8	got1	Cluster1
X1WE42	nid2a	Cluster1
Q7ZUB0	myl13	Cluster1
A0A0R4ITP1	A0A0R4ITP1	Cluster1
F1Q6V0	myl4	Cluster1
A0A0R4IE10	eef1a1l2	Cluster1
Q6P969	eef1a1a	Cluster1
Q802W2	aldh9a1b	Cluster1
Q6NYQ7	nnt	Cluster1
E9QDE7	nnt2	Cluster1
E7FD66	aass	Cluster1
X1WBX1	prr33	Cluster1
B0S5C5	acaa2	Cluster1
E7FCW1	E7FCW1	Cluster1
A0A2R8RRC9	hadhb	Cluster1
Q7SX99	fh	Cluster1
F1R838	dhtkd1	Cluster1
E7FF41	ahsg1	Cluster1
Q7SYK7	got2a	Cluster1
F1QCD4	got2b	Cluster1
F1QGK0	gpd1b	Cluster1
Q567A1	gpd1a	Cluster1
A0A0G2L836	nid1b	Cluster1
Q6P5L8	hsdl2	Cluster1
F1QM47	c7a	Cluster1
A0A0A0MPL5	A0A0A0MPL5	Cluster1
Q6TNU6	dldh	Cluster1
Q6DHT4	aldh6a1	Cluster1
A0A2R8RXT8	ak1	Cluster1
Q6NWJ5	tuba8l4	Cluster1
Q8JFV8	vat1	Cluster1
B0V0X1	pccb	Cluster1
A5PMV7	ppp2r1ba	Cluster1
Q6PBI0	sucla2	Cluster1
A0A2R8Q0N5	cpt2	Cluster1
Q6IQ59	uqcrc2b	Cluster1
A0A286YAZ5	hdac8	Cluster1
B8JMZ1	ugp2a	Cluster1
F1QEG2	klhl41b	Cluster1
E9QIN8	klhl41a	Cluster1
A2BIN5	mccc2	Cluster1
Q7SYB8	gys1	Cluster1
Q6AZC1	psmc5	Cluster1
A0A0G2KCK6	spata5	Cluster1
Q7T3B1	psmc2	Cluster1
Q6AZA0	acat1	Cluster1
Q66I16	etfdh	Cluster1
Q8JHI0	slc25a5	Cluster1
E7EXC4	serpinb14	Cluster1
F8W475	serpinb1l4	Cluster1
A4QPA0	me3	Cluster1
A0A0G2KZ18	LOC100001114	Cluster1
A8E7M5	cand2	Cluster1
B3DIV6	dlat	Cluster1
F1QGT0	nexn	Cluster1
F1R6L6	ncl	Cluster1
F1QNB1	ank3a	Cluster1
F8W268	ank3b	Cluster1
B8JK17	ank1a	Cluster1
A0A2R8RQY1	ank1b	Cluster1
Q7ZVF3	sdha	Cluster1
A0JMN2	A0JMN2	Cluster1
Q642H6	crata	Cluster1
A0A140LH30	dnm1l	Cluster1
Q7T3G4	pgam2	Cluster1
A0A0R4ISX2	tars3	Cluster1
F1QJE0	uqcrc2a	Cluster1
B3DHC5	apoa4b.2	Cluster1
F8W315	F8W315	Cluster1
A0A2R8QMW7	A0A2R8QMW7	Cluster1
Q6NUZ3	syncrip	Cluster1
A0A0R4IHZ5	hnrnpr	Cluster1
A8KC30	psmc1a	Cluster1
F1QGH9	psmd11b	Cluster1
Q2MJQ8	smyd1b	Cluster1
A0A2R8QFM8	dpysl2b	Cluster1
Q6NYV1	psmd3	Cluster1
A0A0A0MPR4	A0A0A0MPR4	Cluster1
Q4V9P8	camk2g1	Cluster1
A0A0R4IQT3	A0A0R4IQT3	Cluster1
F1QGL7	camk2d2	Cluster1
F1RAV5	rps6ka1	Cluster1
F1QRX4	bin1b	Cluster1
A0A0R4ILA8	psmc3	Cluster1
F1R2E0	hnrnpm	Cluster1
B0V234	fhl2b	Cluster1
F8W3J9	tnni2a.2	Cluster1
A3QJU3	coq8b	Cluster1
Q6DFZ8	capn2l	Cluster1
A0A2R8QHT3	ubr4	Cluster1
Q7ZT36	pvalb3	Cluster1
Q804W0	pvalb1	Cluster1
Q6AZA2	ndufv1	Cluster1
F1QUE3	uqcrc1	Cluster1
F1QTZ4	padi2	Cluster1
Q24JV6	myl2b	Cluster1
B8JLJ3	ywhaz	Cluster1
Q7ZW20	ywhae1	Cluster1
E7F354	ywhag2	Cluster1
Q6P102	ywhabl	Cluster1
B0R1D0	psmc4	Cluster1
A5PN55	me2	Cluster1
A0A286Y7Z2	me1	Cluster1
B3DIZ3	B3DIZ3	Cluster1
F1R8B4	gcn1	Cluster1
F6NP87	ndufa9a	Cluster1
A0A0R4IDE1	myot	Cluster1
A0A0R4IWI7	kif5aa	Cluster1
A0A2R8QGK7	mccc1	Cluster1
F1R605	cacnb1	Cluster1
Q7ZUS9	etfa	Cluster1
F1QE62	hibadhb	Cluster1
E9QFY4	synpo2b	Cluster1
Q7T3G5	pabpc4	Cluster1
F1Q5Q3	serbp1a	Cluster1
E7EYQ0	serbp1b	Cluster1
F1QUG5	eif3c	Cluster1
F1QFQ7	acadsb	Cluster1
A0A2R8RUM2	ilf3a	Cluster1
F1QSU4	pdlim5b	Cluster1
A0A0R4IS44	pdlim5b	Cluster1
F1R9Y9	etfb	Cluster1
F1RDV2	ndufa10	Cluster1
A3KQR0	acadl	Cluster1
F1QFV2	hnrnpa1b	Cluster1
E7FAQ8	hnrnpa1a	Cluster1
Q7T368	pdhb	Cluster1
Q6DRD2	psmc6	Cluster1
A0A0R4IUB7	metap2b	Cluster1
Q6GQL7	fhl1a	Cluster1
Q5RH26	atp5f1c	Cluster1
E7F4R9	idh2	Cluster1
B2GTW6	cs	Cluster1
A2AWA1	ddx39aa	Cluster1
Q803W0	ddx39ab	Cluster1
F1Q555	gpd2	Cluster1
A0A0R4IAH3	eci2	Cluster1
Q6PC77	atp5pd	Cluster1
A0A0R4IJ30	opa1	Cluster1
A0A0R4INZ8	dbt	Cluster1
Q5RIN3	txlnba	Cluster1
A0A140LGU1	hp1bp3	Cluster1
Q8AW07	psmd12	Cluster1
A0A0R4IXA9	cap2	Cluster1
Q7ZVZ6	Q7ZVZ6	Cluster1
Q24JW4	flj13639	Cluster1
X1WFH2	si:ch211-165b10.3	Cluster1
E7F0K3	cavin1a	Cluster1
Q9PTH5	psme1	Cluster1
A4VAK4	hspb1	Cluster1
Q6IMW7	pvalb4	Cluster1
F1QR17	aldh7a1	Cluster1
Q5RH29	itih2	Cluster1
F1QGW6	eif2s3	Cluster1
Q6DI22	hadh	Cluster1
Q6IQE2	eef1b2	Cluster1
A0A0R4IPX4	eef1da	Cluster1
Q8AWD0	vdac2	Cluster1
Q7ZV39	Q7ZV39	Cluster1
A0A0R4IJ61	oxct1a	Cluster1
F1R972	cavin4a	Cluster1
A7MCR1	uqcrfs1	Cluster1
A9ULS4	rab6a	Cluster1
Q6DGV5	rab10	Cluster1
Q8AW60	ivd	Cluster1
A0A286YAZ1	A0A286YAZ1	Cluster1
Q52PJ5	dpysl3	Cluster1
F1R2V0	aoc2	Cluster1
E7FAV9	E7FAV9	Cluster1
A9C3T0	prkar2aa	Cluster1
Q4VBU0	bckdha	Cluster1
F1QSU0	cavin4b	Cluster1
F1Q931	larp1b	Cluster1
A0A0R4I9S5	naa15b	Cluster1
Q6DRD1	atp5po	Cluster1
A5PL98	sdhb	Cluster1
Q5PR98	ndrg2	Cluster1
B8JIS1	atp5pb	Cluster1
F1R2D9	si:ch211-51c14.1	Cluster1
F1QHT9	ddx19	Cluster1
A0A0R4IMY9	dtnba	Cluster1
F1R319	slc25a11	Cluster1
X1WE86	flii	Cluster1
F1R4C8	ndufs3	Cluster1
E7F355	tns1a	Cluster1
F1QI59	ppp1cb	Cluster1
A1A5X4	add1	Cluster1
A0A0R4IKE0	casq1a	Cluster1
A8E5C5	dhrs7ca	Cluster1
F8W2V6	idh3b	Cluster1
A0A2R8QPC9	idh3b	Cluster1
F1Q4N4	ndufs2	Cluster1
Q7ZZ04	echs1	Cluster1
A0A286YA64	A0A286YA64	Cluster1
A0A0R4IPQ7	2021-09-06	Cluster1
F1QHG2	F1QHG2	Cluster1
Q7T2C5	prkcba	Cluster1
A0A0R4IBJ4	A0A0R4IBJ4	Cluster1
Q6Q7X9	klhl31	Cluster1
Q9PU58	nipsnap2	Cluster1
A0A2U3TW16	A0A2U3TW16	Cluster1
Q804W2	pvalb7	Cluster1
F1QXJ4	stxbp3	Cluster1
F1R4A4	F1R4A4	Cluster1
Q7ZUY3	h2ax	Cluster1
F1QZA5	psmd6	Cluster1
Q9DDE3	ache	Cluster1
Q7SZE5	sec23a	Cluster1
B0R197	vdac3	Cluster1
B7ZV62	nsfa	Cluster1
X1WDB0	map1ab	Cluster1
A2BIC6	lap3	Cluster1
F1QCN0	gatd3a	Cluster1
Q5SPJ4	serpina1	Cluster1
Q5SPJ1	serpina1l	Cluster1
A3KGZ6	ppp3cca	Cluster1
A0A0R4IDG4	A0A0R4IDG4	Cluster1
Q6NV33	idh3a	Cluster1
Q7SXN2	hnrnpdl	Cluster1
U3JA30	ablim2	Cluster1
U3JB13	ablim1b	Cluster1
E9QFU8	bcat2	Cluster1
A0JME5	phkg1a	Cluster1
F1QY34	lrp1ab	Cluster1
F1QX93	eci1	Cluster1
E9QED5	si:dkey-30j10.5	Cluster1
Q1L8N2	rad23ab	Cluster1
Q7ZWA3	rbmx	Cluster1
A0A0G2KQU1	snta1	Cluster1
F1REH8	anxa13	Cluster1
A8E7L0	anxa13l	Cluster1
A0A0R4ILV8	col18a1b	Cluster1
E9QI46	coro1cb	Cluster1
F1Q6F3	c8a	Cluster1
A2BGU8	septin3	Cluster1
Q6NWC1	vdac1	Cluster1
Q6DRE8	snrnp70	Cluster1
A0A2R8PZB2	si:dkey-156n14.5	Cluster1
F1RA33	ada	Cluster1
Q498W6	ndufa12	Cluster1
A0A0R4IHV6	gps1	Cluster1
Q568B3	2021-09-10	Cluster1
A0A2R8RYH8	slc25a3b	Cluster1
Q6DBR6	stac3	Cluster1
Q6NVA6	myl9b	Cluster1
Q6DKF0	mxc	Cluster1
F1QFQ6	dlst	Cluster1
Q6DHL8	tnni1d	Cluster1
A0A2R8PZG4	A0A2R8PZG4	Cluster1
F1R665	cavin2b	Cluster1
B5DDE8	rps8b	Cluster1
Q3B7R0	cyc1	Cluster1
I3ITP3	mbpa	Cluster1
F8W3V8	mbpa	Cluster1
Q6P124	g3bp1	Cluster1
A0A2R8RJJ7	pbldp	Cluster1
F6NYT7	gpx1a	Cluster1
Q802Z5	nono	Cluster1
E7FC79	si:cabz01113374.3	Cluster1
F1QBR1	tnnt2d	Cluster1
Q5RH04	chchd3a	Cluster1
A0A2R8Q483	vimr2	Cluster1
F1QWB4	F1QWB4	Cluster1
B8JLJ8	hnrpkl	Cluster1
Q6NWH2	marcksl1b	Cluster1
B8A5L1	ecpas	Cluster1
B0V1K1	aimp1a	Cluster1
A3KPI6	si:ch211-288g17.3	Cluster1
B0S642	hibch	Cluster1
Q3ZB95	mpi	Cluster1
Q3B7P7	uba52	Cluster1
F1RDX1	auh	Cluster1
A9JRU2	pdp1	Cluster1
E7F9M7	si:ch73-18b11.1	Cluster1
Q503G5	gmpr	Cluster1
A5WWI6	pfn2l	Cluster1
Q7ZVJ0	pfn2l	Cluster1
Q6DHS0	trim55a	Cluster1
B8JI86	trim63b	Cluster1
F1Q9S3	F1Q9S3	Cluster1
Q1LV81	safb	Cluster1
F1QBP1	myoz2b	Cluster1
A0A0R4IFL5	A0A0R4IFL5	Cluster1
Q08C78	btf3	Cluster1
Q7T1J9	rps10	Cluster1
Q66I80	fabp4a	Cluster1
A0A0R4IY09	akt2l	Cluster1
A0A140LFP6	obscnb	Cluster1
F1QQT3	lims1	Cluster1
F1R9E2	lims2	Cluster1
Q4V918	psma3	Cluster1
A0A0R4IUE2	ndufv3	Cluster1
Q6IQC6	psmd4a	Cluster1
Q7ZYY0	acad8	Cluster1
A0A140LGS9	selenoj	Cluster1
Q6IQM2	cyc	Cluster1
B3DG31	si:rp71-45k5.4	Cluster1
Q6PEH5	ube2v2	Cluster1
B8JI00	suclg1	Cluster1
B8JJ32	sfxn3	Cluster1
B8JK21	casp3a	Cluster1
B0R159	bckdk	Cluster1
Q800H6	matr3l1.1	Cluster1
Q6PHD6	ilk	Cluster1
Q68FN5	fhl5	Cluster1
A0A0G2KH95	psmd2	Cluster1
Q66IB6	hmgb2b	Cluster1
Q7ZV77	psma4	Cluster1
Q6P0T0	ndufs8a	Cluster1
Q6PFT1	fbp1a	Cluster1
F1QZ04	acy1	Cluster1
X1WDI1	svilc	Cluster1
E9QG20	E9QG20	Cluster1
Q7ZUI4	Q7ZUI4	Cluster1
Q1LYB6	atp5if1b	Cluster1
F8W4G8	fxr1	Cluster1
Q6DBS8	cfd	Cluster1
Q1RM09	basp1	Cluster1
A0A0R4J7R2	myo18aa	Cluster1
A0A2R8QNN1	si:ch211-198n5.11	Cluster1
F6P0J3	casq1b	Cluster1
Q4VBV1	uqcrb	Cluster1
A0A0R4IX64	si:ch73-132f6.5	Cluster1
Q6PBX8	ndufv2	Cluster1
A0A2R8QGS9	ech1	Cluster1
Q6DBR7	Q6DBR7	Cluster1
F1QJ56	ndufb10	Cluster1
Q6PC22	ndufa8	Cluster1
Q7SXM1	cox6b2	Cluster1
F1R8S3	plcd1b	Cluster1
Q6DI16	casq2	Cluster1
A8E7K4	pcyt1aa	Cluster1
F1R0J8	pdhx	Cluster1
A0A286Y9C9	nt5c1aa	Cluster1
A0A0A0MPU2	obsl1b	Cluster1
Q5CZV1	smtnl1	Cluster1
Q5I0F6	prkar1aa	Cluster1
A0A0G2KDJ5	comp	Cluster1
F1QKL1	thbs3a	Cluster1
E7FFW9	gig2l	Cluster1
Q6TEN1	rap1b	Cluster1
F8W4E2	smpdl3b	Cluster1
Q7T3E5	Q7T3E5	Cluster1
B0S751	ptgesl	Cluster1
F1QTP7	myoz3a	Cluster1
Q7SXN6	psma6a	Cluster1
A0A0R4IUF6	A0A0R4IUF6	Cluster1
A2RUY5	ubap2b	Cluster1
F1QYT4	hhatlb	Cluster1
Q6PHK6	purb	Cluster1
A0A0R4IS70	purba	Cluster1
Q6DRF3	psmb1	Cluster1
A0A2R8QB98	gcdhb	Cluster1
A0A0R4ILN2	gcdhb	Cluster1
F1QGK5	calcoco2	Cluster1
F1QRA8	paplnb	Cluster1
Q4QRF7	leg1b	Cluster1
F1QHE5	psmd14	Cluster1
Q6GMJ3	mapre3b	Cluster1
Q32PL1	ppp1r7	Cluster1
Q7ZU48	hnrnpa0l	Cluster1
F8W4C1	mbpb	Cluster1
A0A0R4ICH7	si:ch1073-398f15.1	Cluster1
F1QRQ0	myef2	Cluster1
F1QTF0	hmgcl	Cluster1
A0A2R8QUZ1	ctcf	Cluster1
Q6NY64	ppp2r2d	Cluster1
F1Q8A5	hnrnpd	Cluster1
F1Q9J0	bag3	Cluster1
A8WGS1	adrm1	Cluster1
F8W3Q7	apobec2a	Cluster1
A0A2R8PZM4	txlnbb	Cluster1
A0A2R8Q976	dhrs4	Cluster1
Q6DHL6	rps6	Cluster1
Q6GQN8	mecr	Cluster1
F1QY00	nmt1a	Cluster1
Q1LV51	ogna	Cluster1
A3KPR3	histh1l1	Cluster1
A0A140LH24	A0A140LH24	Cluster1
A0A2R8Q0U0	A0A2R8Q0U0	Cluster1
F1R314	F1R314	Cluster1
A0A2R8RV42	smarcc2	Cluster1
A8WFU6	serpinh1a	Cluster1
F1QQ04	serpinh1b	Cluster1
Q6NWF0	Q6NWF0	Cluster1
E7FF10	vwa1	Cluster1
A0A0R4I9A8	hspb11	Cluster1
A5JV83	hspb11	Cluster1
Q6IQT4	cops2	Cluster1
F1QYS7	acss1	Cluster1
Q3B732	hmgn2	Cluster1
Q9PUC4	psme2	Cluster1
A0A2R8QM99	hesx1	Cluster1
A0A2R8QJ70	setb	Cluster1
Q6PD99	marcksl1a	Cluster1
A7YY99	atp5mea	Cluster1
Q6NWC6	cpsf6	Cluster1
Q5TYR6	crip2l	Cluster1
F1R3F7	c1qbp	Cluster1
Q7SX94	pfdn6	Cluster1
A0A0R4IK06	ankfy1	Cluster1
Q7ZUC5	prkcda	Cluster1
E7FFE8	nt5dc3	Cluster1
B7ZDB5	bgnb	Cluster1
R4GEE3	tom1l2	Cluster1
R4GE14	si:ch211-207i1.2	Cluster1
F1QGB0	syne2b	Cluster1
Q1L8P1	fkbp9	Cluster1
Q0P3U4	cox5b2	Cluster1
Q6DGM9	ndufa7	Cluster1
X1WHQ9	X1WHQ9	Cluster1
Q503D8	txndc12	Cluster1
A0A2R8RP85	sncgb	Cluster1
F1QC13	F1QC13	Cluster1
F1Q861	F1Q861	Cluster1
F1QJK0	myo1eb	Cluster1
Q567Y4	ndufb9	Cluster1
E9QJ30	klhl40b	Cluster1
Q6DHI9	psmb2	Cluster1
A0A2R8Q7L1	A0A2R8Q7L1	Cluster1
X1WH50	si:ch211-137a8.4	Cluster1
A9C4A2	si:ch73-237c6.1	Cluster1
A0A0R4IC54	hspb7	Cluster1
A0A2R8Q5H4	A0A2R8Q5H4	Cluster1
F1QT65	homer2	Cluster1
Q4VBU7	cox5aa	Cluster1
A0A0R4IVC8	cox5ab	Cluster1
A8E7N8	psmb4	Cluster1
Q7T3B0	eif3m	Cluster1
A0A2R8RPF6	si:dkey-40c11.2	Cluster1
Q6TNV0	cox4i1	Cluster1
A8E7G6	prdx3	Cluster1
B8JM11	epcam	Cluster1
Q6GMH3	twf2	Cluster1
Q4VBI5	ndufa2	Cluster1
Q7T2P7	glula	Cluster1
F1Q6F9	sltm	Cluster1
Q0PWB8	pdlim3b	Cluster1
A0A140LH75	pdlim3b	Cluster1
Q08BB1	gfm1	Cluster1
Q7T2T7	mecp2	Cluster1
A0A0R4IBX9	si:ch73-1a9.3	Cluster1
Q566R8	hspb2	Cluster1
A0A0R4IKV3	nadk2	Cluster1
B8JM34	atp5pf	Cluster1
F1QK92	uqcc1	Cluster1
A5WWI5	ahsg2	Cluster1
A0A286Y8D7	cul2	Cluster1
Q5U3J4	clint1a	Cluster1
B7ZD40	sar1ab	Cluster1
Q6NYZ0	dnajb11	Cluster1
Q1JPZ7	prpf39	Cluster1
F1QAG3	smyd2a	Cluster1
Q6PBJ9	rplp2	Cluster1
Q7ZUD6	rtn3	Cluster1
A0A0R4IMS3	rpl24	Cluster1
F1Q9K6	F1Q9K6	Cluster1
Q5U3E2	cetp	Cluster1
B0UXI4	syn1	Cluster1
Q6P6E0	atp5l	Cluster1
Q6NYV3	h1-0	Cluster1
A0A0R4IBS6	sgcd	Cluster1
F1RAX8	coq6	Cluster1
A0JME6	isoc2	Cluster1
Q6DH63	cox6b1	Cluster1
A0A2R8QUY1	bckdhb	Cluster1
Q5BJA2	ndufa5	Cluster1
A0A286YAH5	tnnt1	Cluster1
A9JTG7	ubac1	Cluster1
B0R0B1	cbwd	Cluster1
Q9PUL9	mtch2	Cluster1
Q7SXI1	cox7a2l	Cluster1
F1QM86	F1QM86	Cluster1
Q6IQ71	cbx1b	Cluster1
I3ISI6	zak	Cluster1
E9QCX4	tcap	Cluster1
Q6DEM5	timm8a	Cluster1
Q6NXA9	Q6NXA9	Cluster1
Q7ZUG5	rps21	Cluster1
A0A2R8Q5A6	wu:fb95e10	Cluster1
F1QGH8	sh3glb1a	Cluster1
A8DZ59	rnls	Cluster1
Q502E4	ndufs4	Cluster1
F1QEJ5	uqcrq	Cluster1
B8A4U0	cd99	Cluster1
A0A2R8Q9T2	micu1	Cluster1
B1NA68	map2k4a	Cluster1
Q9DGI4	atp1b3b	Cluster1
F1RBK6	ndufa6	Cluster1
F1R0N0	lrrc17	Cluster1
F6NQ58	serpinf2a	Cluster1
F1R223	LOC795887	Cluster1
F1QMH7	dag1	Cluster1
Q1LVG7	atp5f1d	Cluster1
Q6PFU1	cd81a	Cluster1
Q7ZTY5	eif2b3	Cluster1
E7F9Y7	E7F9Y7	Cluster1
B3DHK5	rbp7b	Cluster1
Q04475	b2m	Cluster1
F1QY27	h1-10	Cluster1
A2VD23	stm	Cluster1
F1QGU0	pgp	Cluster1
A0A0R4ICR8	bsg	Cluster1
Q1LWY1	psmb13a	Cluster1
A0A0R4ITU6	btf3l4	Cluster1
E7F125	ifi44a1	Cluster1
A0A2R8QRW5	gstt2	Cluster1
A0A2R8Q7M9	osbpl2a	Cluster1
Q6P6E5	ndufb7	Cluster1
A2AV34	coq9	Cluster1
A8DZG2	srsf6b	Cluster1
Q7ZUS7	ppp6c	Cluster1
Q502P6	ndufs5	Cluster1
E9QI88	entpd5b	Cluster1
B8A552	smarca5	Cluster1
A0A1L1QZG0	cct2	Cluster1
B6IDE8	frem3	Cluster1
A3QJX4	sars2	Cluster1
E7F1G6	b2ml	Cluster1
Q6DBW2	paip1	Cluster1
Q5G9L7	crabp2b	Cluster1
A0A2R8QH31	smtnl	Cluster1
F1QS14	klc1a	Cluster1
Q1LUV5	s100v2	Cluster1
A0A0H2UKW6	akap8l	Cluster1
Q6NW47	ckap4	Cluster1
F1QXF4	thoc2	Cluster1
Q6P104	qkib	Cluster1
A0A2R8QD68	LOC100331378	Cluster1
Q7ZV27	dmac2l	Cluster1
Q6P0K1	Q6P0K1	Cluster1
M9MMA7	alpk3a	Cluster1
Q29RA5	tigara	Cluster1
F1QAJ8	tnikb	Cluster1
F1QQG8	tnikb	Cluster1
A5PMY5	stam	Cluster1
B0S784	B0S784	Cluster1
B8A5J2	coa6	Cluster1
F1QJG3	si:dkey-21e2.13	Cluster1
F1Q511	acin1b	Cluster1
A5PN22	A5PN22	Cluster1
Q7SXT6	msi2b	Cluster1
X1WBM6	si:ch73-265h17.2	Cluster1
Q566Y8	magoh	Cluster1
Q7SYM1	foxk1	Cluster1
B0S648	ftr36	Cluster1
E7F123	si:ch211-106j24.1	Cluster1
A8E5B7	ndufb5	Cluster1
E7F836	arhgef6	Cluster1
F1RE63	arhgef7b	Cluster1
Q6IQJ7	rpl37	Cluster1
E7EYW2	epn2	Cluster1
Q6PBP3	prxl2a	Cluster1
B0QZE8	dcaf6	Cluster1
F1Q8C8	prkra	Cluster1
Q7ZTT8	Q7ZTT8	Cluster1
Q5RIH8	serpina10a	Cluster1
A0A2R8QB62	A0A2R8QB62	Cluster1
A3KNR2	si:dkey-238c7.16	Cluster1
Q568Q7	stmn1b	Cluster1
Q4QRG0	ewsr1b	Cluster1
Q503Y0	endog	Cluster1
A0A0R4IJN3	vamp3	Cluster1
A0A2R8QTA1	thy1	Cluster1
F1QE17	dusp23b	Cluster1
A0A0R4INU1	rbm12	Cluster1
E7FBR8	E7FBR8	Cluster1
F1QAI8	kyat1	Cluster1
Q6PC42	parvb	Cluster1
Q6PBM1	glrx5	Cluster1
Q566S7	mrps18b	Cluster1
A0A2R8Q8S1	kras	Cluster1
A0A2R8QLT7	engase	Cluster1
Q6PBJ6	ndufb6	Cluster1
A8WHV7	mrps36	Cluster1
A0A2R8PXX5	prrc2a	Cluster1
A0A2R8QHQ4	ebna1bp2	Cluster1
F1Q4Z5	atpaf1	Cluster1
Q6DH29	mrps26	Cluster1
Q6YLH9	cav1	Cluster1
B0S8G4	col18a1a	Cluster1
Q2L6K8	cnpy4	Cluster1
F1QRV6	nap1l4b	Cluster1
B3DJA9	dnajc3b	Cluster1
A0A0R4IXD8	dync1i2b	Cluster1
Q6DH28	mob4	Cluster1
A0A1D5NSV3	si:dkey-38l22.2	Cluster1
Q6PBJ1	fkbp1b	Cluster1
E7FBI2	E7FBI2	Cluster1
A0A0R4IJJ4	limch1b	Cluster1
Q6P131	txn2	Cluster1
Q7ZVL5	serpine2	Cluster1
Q6P268	pdcl3	Cluster1
F1QFH8	apom	Cluster1
F1QV80	ftr50	Cluster1
Q4G5V7	rtn1a	Cluster1
A0A0R4ISM7	palm2akap2	Cluster1
Q503U1	lyrm5a	Cluster1
F1QEG6	mrps34	Cluster1
E7F9D4	maptb	Cluster1
E7FH04	mapta	Cluster1
E7F2K4	si:ch211-140m22.7	Cluster1
E7F9R3	pklr	Cluster1
Q7ZU20	psme3	Cluster1
Q7T3B8	naa10	Cluster1
A0A2R8PWG5	prpf6	Cluster1
Q4U0V5	Q4U0V5	Cluster1
A0A2R8RI07	A0A2R8RI07	Cluster1
A0A0R4IIK3	emc1	Cluster1
A0A2R8QIA2	lin7c	Cluster1
Q6PC63	lin7a	Cluster1
A0A0R4IRB1	A0A0R4IRB1	Cluster1
B7ZD34	rps24	Cluster1
A0A2R8RTM3	palm1b	Cluster1
Q803S1	smarce1	Cluster1
Q6NWI7	tmed10	Cluster1
F1R6A1	hmbsb	Cluster1
Q1LWG2	ndufs6	Cluster1
A0A2R8QGF4	si:ch211-1a19.3	Cluster1
Q5RGD7	exoc2	Cluster1
Q6PBK1	ccdc58	Cluster1
B7ZV06	chmp2a	Cluster1
A0A0G2KS58	A0A0G2KS58	Cluster1
A5D6R3	plcd3a	Cluster1
B0BLY0	exoc5	Cluster1
Q5SPB2	scaf11	Cluster1
Q5TZA4	si:dkeyp-55f12.3	Cluster1
Q503Z0	tpd52l1	Cluster1
Q5BKV7	crip1	Cluster1
A0A2R8RXG6	A0A2R8RXG6	Cluster1
Q4V969	Q4V969	Cluster1
F1QLZ5	sinhcafl	Cluster1
E9QG97	tpd52l2a	Cluster1
Q5TYY2	exoc4	Cluster1
X1WG23	sptbn5	Cluster1
Q6P119	ndufb3	Cluster1
Q6NYL3	ehhadh	Cluster1
A0A0R4ILG5	ndufs7	Cluster1
Q1LUT0	nutf2	Cluster1
A0A2R9YJM4	pacsin1a	Cluster1
Q6PBX9	reep5	Cluster1
F6P1Y9	F6P1Y9	Cluster1
Q4G5W2	rtn4a	Cluster1
A0A2R8QFT7	emc2	Cluster1
Q6PBU7	uqcc2	Cluster1
F1QBV5	kif1b	Cluster1
F6NI63	vsnl1a	Cluster1
Q5TZ35	vsnl1b	Cluster1
Q503X4	mrps17	Cluster1
F1R611	ndufab1a	Cluster1
F6P873	atp5mf	Cluster1
Q7ZVL1	osbpl2b	Cluster1
Q5RHZ6	osgep	Cluster1
Q08C76	ssuh2	Cluster1
B8JIS9	B8JIS9	Cluster1
B3DHE6	nudt19	Cluster1
E7F424	mlip	Cluster1
A2BHS1	hspb8	Cluster1
Q6PC34	hpca	Cluster1
A3KNH4	plod3	Cluster1
B0S7W6	spryd4	Cluster1
A0A2R8PVL4	fnbp1b	Cluster1
B8JKQ0	ndufaf5	Cluster1
F8W5H1	mtm1	Cluster1
R4GF18	si:ch211-255p10.3	Cluster1
A0A2R8QMC2	A0A2R8QMC2	Cluster1
Q1LUK1	micos13	Cluster1
A0A0R4IL08	si:ch73-173h19.3	Cluster1
F1Q7R2	chad	Cluster1
E7EY90	mustn1b	Cluster1
F1QU23	unc45a	Cluster1
Q6PCR6	zfr	Cluster1
E7FDW7	nlrx1	Cluster1
A0A2R8QMB8	ccdc47	Cluster1
F1RDW1	pbxip1a	Cluster1
Q6DEN0	ufc1	Cluster1
A0A2R8RJ84	si:dkey-73n8.3	Cluster1
Q6ZM61	ube2g1b	Cluster1
R4GDR2	snrpb2	Cluster1
F1QCE9	ndufab1b	Cluster1
F1R182	aimp2	Cluster1
F1Q5S9	spcs2	Cluster1
Q5SP67	wdr26	Cluster1
Q803U6	aqp3a	Cluster1
A0A0R4IUB6	epn1	Cluster1
A5PMM3	hspb3	Cluster1
A0A2R8QN58	tprkb	Cluster1
A0A0G2L2Q2	uqcr10	Cluster1
A0A0R4IAX0	fnbp1l	Cluster1
Q32LR4	poglut1	Cluster1
Q6DC87	bola3	Cluster1
F1R9R7	agfg1a	Cluster1
Q6P5L5	ndufb8	Cluster1
Q7ZWB4	arl6ip1	Cluster1
Q7ZT82	rbfox1l	Cluster1
F1QCR3	palm3	Cluster1
F1Q9N4	nudt8	Cluster1
Q1LV17	irf2bp1	Cluster1
F1Q5I0	cdk5rap3	Cluster1
F8W3H2	atp5f1e	Cluster1
A0A286Y993	lxn	Cluster1
Q9MIY7	mt-co2	Cluster1
Q1LX81	psme3ip1	Cluster1
Q6IQM0	sf3b6	Cluster1
B0UXV7	dnajc1	Cluster1
F1R0I2	apoda.1	Cluster1
Q58ED3	srpx	Cluster1
Q9MIY6	mt-atp8	Cluster1
F1QWG9	xaf1	Cluster1
A0A0R4IYB7	naa25	Cluster1
B3DKM3	tmed3	Cluster1
F1QF18	dcaf8	Cluster1
A5WV15	acsl4b	Cluster1
Q1L8R9	snapin	Cluster1
F1QFV1	cttnbp2	Cluster1
B0R0R1	raph1b	Cluster1
A0A0R4IJ25	smarca2	Cluster1
A0A0R4IW47	col5a3a	Cluster1
A8E7L6	nudcd1	Cluster1
A0A0R4IHP8	elmo1	Cluster1
A0A2R8QJP7	nit1	Cluster1
F1Q504	sgcg	Cluster1
F1R5N2	mia3	Cluster1
Q5TYS5	scrn2	Cluster1
F1RCW8	si:dkeyp-77c8.4	Cluster1
A0A0R4IL48	rtn4b	Cluster1
A0A0R4IPH0	phactr4a	Cluster1
E7FDX0	E7FDX0	Cluster1
F1QU62	svilb	Cluster1
A0A0R4IJ50	hdhd5	Cluster1
F1Q7X5	cenpf	Cluster1
Q1L9G6	cd9b	Cluster1
E7F829	aebp1	Cluster1
Q6DGZ5	gng7	Cluster1
A0AUR5	mindy3	Cluster1
F1RDZ8	nampt2	Cluster1
Q5RGJ5	cwf19l1	Cluster1
Q6P109	Q6P109	Cluster1
X1WFV2	mylk4a	Cluster1
A4QN63	cnot2	Cluster1
F1QSS5	si:ch73-27e22.4	Cluster1
A0A0R4IAX2	si:dkey-17o15.2	Cluster1
A0A1D5NSW9	fhod1	Cluster1
F1R809	ndufa3	Cluster1
F1RDR2	mrps27	Cluster1
A0A2R8PY46	mlf1	Cluster1
B0S6D0	B0S6D0	Cluster1
F1QGP8	hmgb3a	Cluster1
A0A0R4I9S9	tnnt2b	Cluster1
F1QIU5	mcamb	Cluster1
E7F062	lmod1b	Cluster1
F1QQS2	cbln13	Cluster1
Q9I9N4	baxa	Cluster1
E7F883	fam135b	Cluster1
Q6NWD4	Q6NWD4	Cluster1
A0A2R8PVM7	A0A2R8PVM7	Cluster1
I3ITH4	kdm4aa	Cluster1
A0JMI9	gfm2	Cluster1
B8JIY3	mrps6	Cluster1
A5PMF8	si:ch211-114l13.9	Cluster1
O42222	mstnb	Cluster1
A0A140LGH1	si:dkey-88j15.3	Cluster1
E7F4U8	scaf4a	Cluster1
F1QWA6	F1QWA6	Cluster1
F6NM27	runx3	Cluster1
Q6DGT8	s100b	Cluster1
F1QJG7	hexim1	Cluster1
F1QI39	ank2b	Cluster1
F1QWW1	pus1	Cluster1
F6PDB9	F6PDB9	Cluster1
Q9PVD9	cd74b	Cluster1
A0A2R8RNZ4	nr3c1	Cluster1
A0A0R4IP09	plekha6	Cluster1
E7FDK6	arnt	Cluster1
B3DIC7	tapbp.2	Cluster1
Q6YMR2	phf5a	Cluster1
A5PMP2	mrps28	Cluster1
Q7T321	kcmf1	Cluster1
E7FEJ0	tsc1b	Cluster1
B3DFP2	uqcc3	Cluster1
A0A1D5NSW6	eml3	Cluster1
Q0P451	coa5	Cluster1
F1QPI1	si:dkeyp-77c8.5	Cluster1
Q7ZVK2	ube2g1a	Cluster1
A0A0G2L559	A0A0G2L559	Cluster1
B8A6B8	tmsb2	Cluster1
Q1LVK8	sec11a	Cluster1
E7F4Q5	E7F4Q5	Cluster1
E7FH06	pde4ba	Cluster1
F1R3Y3	get4	Cluster1
F1R5Z2	fndc1	Cluster1
A0A2R8PWA9	sbf1	Cluster1
Q32PV0	gulp1	Cluster1
Q6DGL8	mrps15	Cluster1
F1Q7F0	prpf38b	Cluster1
F1QTE3	add2	Cluster1
E9QIM7	palm1a	Cluster1
E7F0V6	LOC100334178	Cluster1
Q1LWD2	ric8b	Cluster1
F1R540	rtn1b	Cluster1
A0A0G2KJM7	lima1a	Cluster1
I3IT78	si:ch211-76l23.4	Cluster1
A0A2R8Q7Q0	A0A2R8Q7Q0	Cluster1
Q7T369	wbp2nl	Cluster1
F1R2L7	igl4v8	Cluster1
F1R0Q8	sdf2	Cluster1
A2CEB4	golga3	Cluster1
A0A0R4IMM3	trappc13	Cluster1
A0A2R8Q9N2	LOC560627	Cluster1
A0A0R4IN07	col5a3b	Cluster1
F1Q6Z1	faf2	Cluster1
E7F366	bptf	Cluster1
F1QBJ3	coa3a	Cluster1
B8JLQ0	lyrm4	Cluster1
A0A0R4IR86	chd2	Cluster1
F1QFR5	dnase1l4.1	Cluster1
Q4VBU5	polr2j	Cluster1
F1QXI2	xrcc1	Cluster1
A3KNP6	sfrp1b	Cluster1
A0A0J9YIW5	A0A0J9YIW5	Cluster1
A0A2R8Q4D0	A0A2R8Q4D0	Cluster1
A7MBY7	ank3b	Cluster1
Q800H4	matr3l1.1	Cluster1
A0A0R4IVS5	man2a1	Cluster1
Q7ZW44	chtopa	Cluster1
F1QHP1	F1QHP1	Cluster1
A0A0R4IN79	nfkb1	Cluster1
F6P8C7	nuggc.3	Cluster1
F1QBB8	si:dkey-27j5.10	Cluster1
E7F6R0	pbxip1b	Cluster1
A0A1D5NS41	mdka	Cluster1
A0A2R8RZ26	wdr70	Cluster1
E7F5B6	E7F5B6	Cluster1
F1RAR9	grk5	Cluster1
A4QNU9	gfer	Cluster1
Q568K2	ppp1r11	Cluster1
Q5SPH9	mrps10	Cluster1
F1R372	arhgap5	Cluster1
O57474	gja1	Cluster1
A0A2R8PZ27	A0A2R8PZ27	Cluster1
A0A0R4IBF6	gmip	Cluster1
Q5RKQ0	bcas2	Cluster1
F6NGW9	snx8a	Cluster1
A0A0R4IY90	A0A0R4IY90	Cluster1
A0A0R4IT40	si:ch211-286o17.1	Cluster1
A0A0R4ITL8	fundc2	Cluster1
A2RV40	rnf126	Cluster1
R4GDT3	adgre5b.2	Cluster1
F1QKQ8	zdhhc8a	Cluster1
F1QGS2	prrc2b	Cluster1
E7FD67	llgl1	Cluster1
E9QCG4	rbm24b	Cluster1
A0A2R8RJV4	A0A2R8RJV4	Cluster1
F1QKE2	F1QKE2	Cluster1
R4GEJ6	hrc	Cluster1
F1RCR0	slu7	Cluster1
F1Q6R7	si:dkey-17m8.1	Cluster1
B8JMA3	ythdc1	Cluster1
I3ISC9	I3ISC9	Cluster1
E7FCJ6	ascc3	Cluster1
Q90XR8	cldnb	Cluster1
A0A2R8RLN8	A0A2R8RLN8	Cluster1
E7EYG0	abcc5	Cluster1
Q1LXZ5	nudt14	Cluster1
Q8JGR2	ddx54	Cluster1
E7FE47	col5a2b	Cluster1
A2BIM5	sdhaf4	Cluster1
F1RCT5	F1RCT5	Cluster1
F1QUE8	surf1	Cluster1
A0A2R8QL15	LOC110438269	Cluster1
Q5XJQ0	angptl7	Cluster1
D3TI80	aqp3b	Cluster1
A0A2R8QCR5	slc35a4	Cluster1
F1QZM7	nol11	Cluster1
E7FCR5	usp32	Cluster1
A0A0R4I9F7	bmi1a	Cluster1
A0A0R4IYN0	adipoqb	Cluster1
E9QG65	tp63	Cluster1
F1Q6U6	fstl1a	Cluster1
B8JHS8	slc8a3	Cluster1
A0A0R4IZ84	smg6	Cluster1
F1QW04	tcirg1b	Cluster1
A3KQS4	mindy1	Cluster1
F1QBE9	ccl25b	Cluster1
A0A2R8RHG4	thrap3a	Cluster1
A0A2R8Q7H4	ptprd	Cluster1
Q6DGP2	syf2	Cluster1
Q5RHB5	irag2	Cluster1
A0A0R4IBP6	A0A0R4IBP6	Cluster1
F1QK10	prkag3b	Cluster1
Q5RFW2	Q5RFW2	Cluster1
A0A1D5NS30	alpk3b	Cluster1
F1QQ42	ndufa1	Cluster1
A0A286YB96	si:dkey-46g23.1	Cluster1
E9QF99	slc7a1a	Cluster1
U3JAH0	bahcc1b	Cluster1
Q6PBZ5	aif1l	Cluster1
Q1LYL9	rpp25l	Cluster1
Q4V9P2	qrich1	Cluster1
A0A0G2KRJ3	A0A0G2KRJ3	Cluster1
E9QDP4	larp4aa	Cluster1
Q6NXB2	Q6NXB2	Cluster1
B8X730	cd40	Cluster1
Q5TZG1	Q5TZG1	Cluster1
X1WFU1	luzp1	Cluster1
A0A2R8RJW1	si:ch1073-296d18.1	Cluster1
A0A2R8Q9P1	si:ch73-42p12.2	Cluster1
Q24JV4	Q24JV4	Cluster1
A0A0R4IZJ1	si:dkey-36i7.3	Cluster1
F1QNC3	F1QNC3	Cluster1
F1Q4R1	dock6	Cluster1
E7FEV5	cylda	Cluster1
E7F4K2	si:dkey-175g6.5	Cluster1
A0A0R4I9V4	polr1a	Cluster1
T1ECU4	piwil2	Cluster1
R4GE22	scaf4b	Cluster1
H0WE43	pla2g6	Cluster1
E7F624	E7F624	Cluster1
E9QI83	E9QI83	Cluster1
Q5RG84	niban1a	Cluster1
F1QA40	F1QA40	Cluster1
A0A2R8Q4U1	nup160	Cluster1
E7EY36	si:ch73-269m14.2	Cluster1
F1RAI1	cmpk2	Cluster1
F1QU33	wapla	Cluster1
E7FFB1	akap9	Cluster1
A5WVY0	rars2	Cluster1
A0A2R8QHJ2	A0A2R8QHJ2	Cluster1
B8JHS9	B8JHS9	Cluster1
A0A2R8QNM8	A0A2R8QNM8	Cluster1
F1Q9N7	si:ch211-264e16.1	Cluster1
F6NSK7	nuggc.1	Cluster1
A0A2R8QD96	vps13d	Cluster1
X1WER9	cox8b	Cluster1
F1Q6Z2	ttll6	Cluster1
Q6DG93	gap43	Cluster1
X1WET4	X1WET4	Cluster1
F1QCK2	abcb6a	Cluster1
Q1L949	si:ch211-250g4.3	Cluster1
E9QGS1	E9QGS1	Cluster1
F1Q6W8	bbs7	Cluster1
A0A2R8QCR7	ptpn23b	Cluster1
F1QPV0	slc37a4b	Cluster1
A0JMQ2	si:dkey-167k11.5	Cluster1
B8JIL3	tlr3	Cluster1
E9QDB1	tns2a	Cluster1
F1QGA2	morc3a	Cluster1
A0A2R8RY46	A0A2R8RY46	Cluster1
A0A0G2KCC7	kbtbd11	Cluster1
A0A0R4ILJ1	map7d1b	Cluster1
F1R3L6	rad54l2	Cluster1
F1QCL9	F1QCL9	Cluster1
E7FE10	stim2b	Cluster1
F1R9Y3	F1R9Y3	Cluster1
F1Q589	deptor	Cluster1
A0A2R8QT19	osbpl1a	Cluster1
F1QT47	tubgcp2	Cluster1
F1RAZ3	F1RAZ3	Cluster1
E7F2L1	aak1b	Cluster1
A0A2R8Q6I1	A0A2R8Q6I1	Cluster1
A0A1D5NSM8	svep1	Cluster1
E7FAC3	si:ch211-161h7.4	Cluster1
A2ASQ4	A2ASQ4	Cluster1
Q567D5	cldn19	Cluster1
I3ITF2	scaf1	Cluster1
E7F4J9	cux1a	Cluster1
B2ZFP3	B2ZFP3	Cluster1
I3IS56	gpatch8	Cluster1
A0A2R9YJL3	ak9	Cluster1
F1Q6D3	galnt9	Cluster1
F1QWS9	tlr2	Cluster1
E7FAS0	pde4a	Cluster1
A0A2R8QTA2	A0A2R8QTA2	Cluster1
B1WB54	B1WB54	Cluster1
F1R0X4	F1R0X4	Cluster1
E7F1G4	r3hcc1l	Cluster1
E7F1A0	E7F1A0	Cluster1
F1QEI3	tmem30aa	Cluster1
E7F6E1	ube4a	Cluster1
F1QWY2	prpf4bb	Cluster1
A0A0R4IXS9	A0A0R4IXS9	Cluster1
Q1LVC2	Q1LVC2	Cluster1
E7EZ74	dthd1	Cluster1
F1RC38	F1RC38	Cluster1
Q6DGJ9	Q6DGJ9	Cluster1
F1R857	F1R857	Cluster1
A0A2R8PY89	fancg	Cluster1
X1WHA2	tnrc18	Cluster1
R4GDU9	R4GDU9	Cluster1
F1QJJ2	nos1apa	Cluster1
A0A0R4IF18	A0A0R4IF18	Cluster1
A0A2R8RQW0	kif20ba	Cluster1
A0A0R4ICQ1	A0A0R4ICQ1	Cluster1
Q1LVE4	xpc	Cluster1
F6NTM9	F6NTM9	Cluster1
A0A2R8QDN5	si:dkey-7i4.9	Cluster1
F8W309	psip1b	Cluster1
F1QF80	ak7b	Cluster1
E9QEG9	nbr1a	Cluster1
F1QKB1	ehmt1a	Cluster1
B0UXW1	B0UXW1	Cluster1
A0A2R8QCF3	arhgef9b	Cluster1
A0A0R4IVA1	vwde	Cluster1
A0A2R8QSF6	A0A2R8QSF6	Cluster1
E7F1U4	syngap1b	Cluster1
A0A2R8PZ68	A0A2R8PZ68	Cluster1
A0A0G2LAH6	A0A0G2LAH6	Cluster1
B0R089	arhgef39	Cluster1
F1RDG2	F1RDG2	Cluster1
A0A0R4IF36	si:ch73-233f7.8	Cluster1
F1R7T3	F1R7T3	Cluster1
F1QPK3	F1QPK3	Cluster1
E9QD84	E9QD84	Cluster1
F1QKM3	F1QKM3	Cluster1
B0R199	B0R199	Cluster1
Q1LVY8	Q1LVY8	Cluster1
F1QF98	rbm19	Cluster1
Q6DH51	Q6DH51	Cluster1
A0A0G2KY42	A0A0G2KY42	Cluster1
F8W5B8	F8W5B8	Cluster2
A0A2R8RQ88	tpm1	Cluster2
F1R9Y5	pck2	Cluster2
F1QYH3	pck1	Cluster2
F6NX52	F6NX52	Cluster2
A8KBV1	oxct1b	Cluster2
Q7T337	fbp1b	Cluster2
E7FH14	E7FH14	Cluster2
Q7T2V2	sult1st3	Cluster2
Q9I8L5	fabp10a	Cluster2
Q6DG85	uox	Cluster2
A0A0R4IL25	erc2	Cluster2
A0A0R4IVV0	mttp	Cluster2
B8JM93	igbp1	Cluster2
F1Q713	sord	Cluster2
Q7SZ49	sdr16c5b	Cluster2
Q6NZZ8	Q6NZZ8	Cluster2
Q6P006	chia.2	Cluster2
F1R1P2	ugt1a7	Cluster2
F1QY24	agxta	Cluster2
Q7ZUC2	sdf4	Cluster2
Q98T96	cyp2ad2	Cluster2
R4GEC2	a1cf	Cluster2
A0A2R8RP31	si:ch211-62a1.3	Cluster2
Q1RLY6	kmo	Cluster2
A0A0R4IQA6	pdxdc1	Cluster2
A0A2R8QJ98	A0A2R8QJ98	Cluster2
F6NIA2	F6NIA2	Cluster2
A4FUP1	hal	Cluster2
P59015	vps18	Cluster2
E7F0T8	si:ch211-11k18.4	Cluster2
A0A0R4IAX5	mlsl	Cluster2
Q29RC0	ush1c	Cluster2
F1R2F7	nme4	Cluster2
Q5TZ82	Q5TZ82	Cluster2
Q1L872	sult3st3	Cluster2
A0A2R8PY83	A0A2R8PY83	Cluster2
A2BGT2	dao.2	Cluster2
A0A0R4IHQ7	A0A0R4IHQ7	Cluster2
Q58G59	kif7	Cluster2
E7F4L4	washc4	Cluster2
F1QYD1	cyp2x9	Cluster2
E7F8C7	baiap2l1a	Cluster2
F1QKR1	fmnl2a	Cluster2
Q1L875	sult3st2	Cluster2
F1RCD0	ccdc12	Cluster2
A0A0R4IBN6	cyp2k18	Cluster2
B8A4V8	tma16	Cluster2
A0A0R4IC81	abcc1	Cluster2
B0UYS3	helb	Cluster2
E9QJF6	E9QJF6	Cluster2
F1QD90	triob	Cluster2
A0A0R4IA28	si:dkey-202l22.6	Cluster2
F1Q7C7	cyp2aa2	Cluster2
F1Q834	mecom	Cluster2
A0A0R4IGP2	A0A0R4IGP2	Cluster2
F1QTD1	F1QTD1	Cluster2
F1R487	pimr196	Cluster2
Q5RHX2	ociad2	Cluster2
F1Q5L3	F1Q5L3	Cluster2
B8JJU3	exoc3l4	Cluster2
X1WFU5	si:dkey-28n18.9	Cluster2
E7FFI4	si:ch211-140b10.6	Cluster2
E7EYK8	E7EYK8	Cluster2
A0A2R8QST3	A0A2R8QST3	Cluster2
A0A2R8Q6G2	si:ch211-59h6.1	Cluster2
E7F7V2	E7F7V2	Cluster2
A8E7S2	A8E7S2	Cluster2
A0A0G2L924	pcdh2g17	Cluster2
A0A0R4IV16	A0A0R4IV16	Cluster2
A0A0R4IDU7	cyp2k20	Cluster2
Q1LX78	Q1LX78	Cluster2
X1WCP5	X1WCP5	Cluster2
E7F5I9	pde6b	Cluster2
E7FFJ6	mybl1	Cluster2
F1QN59	ksr1a	Cluster2
B8A5T0	espnlb	Cluster2
G1K2X0	ttn.1	Cluster3
A2BGX6	myhc4	Cluster3
B8JLS3	myh6	Cluster3
E7F9L8	myo1d	Cluster3
E7EYD0	myom1a	Cluster3
A0A0R4IUZ8	myom1b	Cluster3
A0A0R4INP3	myom2a	Cluster3
D1GJ56	actn3a	Cluster3
A0A0R4IAS2	ppl	Cluster3
F1QAU9	dspb	Cluster3
F8W4Q1	dspa	Cluster3
A0A2R8Q449	A0A2R8Q449	Cluster3
P13104	tpma	Cluster3
Q6DHU3	krt97	Cluster3
Q1LXK0	krt1-19d	Cluster3
Q7T306	ckmb	Cluster3
A2BHA3	ckma	Cluster3
Q58EB2	igfn1.1	Cluster3
F1Q4X8	evpla	Cluster3
A6H8Q3	mybphb	Cluster3
Q6PC89	eno1b	Cluster3
Q6P271	atp1a3a	Cluster3
Q75U66	Q75U66	Cluster3
A0A0R4ID71	evplb	Cluster3
O93409	mylpfa	Cluster3
E9QG51	mylpfb	Cluster3
Q9I8U7	mylz3	Cluster3
B8JKH7	mylz3	Cluster3
E7F2X0	clip1a	Cluster3
Q9PUQ6	tmod4	Cluster3
Q6P0T7	tnnt3b	Cluster3
E9QIW4	tnnt3b	Cluster3
O42363	apoa1	Cluster3
Q6DHC4	bfb	Cluster3
F1QJD1	apoa4b.2	Cluster3
Q9I8U8	tnnc2	Cluster3
A0A0R4INV7	A0A0R4INV7	Cluster3
Q7SXP1	capzb	Cluster3
Q6DHU6	tnni2a.3	Cluster3
Q9I8V0	pvalb2	Cluster3
Q5TYP7	ehd3	Cluster3
A0A0R4IRM1	kif5ba	Cluster3
F1QDG9	smyd1a	Cluster3
Q7SXL4	nme2b.2	Cluster3
F1R9B8	si:ch211-241e1.3	Cluster3
F1QQL4	si:ch211-125o16.4	Cluster3
F1QE25	naa15a	Cluster3
F1RCJ4	capn9	Cluster3
F1QF15	actr2a	Cluster3
F1QE65	cyfip1	Cluster3
Q6AZ98	sec23b	Cluster3
A5WVL5	fbp2	Cluster3
A2AR70	pfkfb1	Cluster3
A0A286Y813	map2k6	Cluster3
Q6IQP1	gyg1b	Cluster3
Q5TYP3	si:dkey-51e6.1	Cluster3
Q1LVE8	sf3b3	Cluster3
F1QVC7	ppp2r2ca	Cluster3
A0A2R8RWG9	A0A2R8RWG9	Cluster3
F1Q510	enosf1	Cluster3
Q568R9	sncga	Cluster3
Q6DC41	Q6DC41	Cluster3
A0A0G2KT98	si:ch73-236c18.9	Cluster3
F1QEU7	F1QEU7	Cluster3
F1QFN1	si:dkey-222l13.1	Cluster3
Q6DC18	phpt1	Cluster3
E7FBR0	pkp1b	Cluster3
F1RDT4	atp6v1e1a	Cluster3
A0A0R4IK68	pank4	Cluster3
Q5RI56	optn	Cluster3
A0A0R4IBS8	snx7	Cluster3
E7FCN9	cspg4	Cluster3
A0A2R8QG50	slc25a14	Cluster3
A0A2R8Q3R9	usp13	Cluster3
E7F2T0	crocc2	Cluster3
A8E7G0	dhdh.1	Cluster3
F8W5Q9	sbds	Cluster3
B0UXS4	si:dkeyp-69e1.8	Cluster3
F1QHX0	lancl2	Cluster3
X1WGK5	X1WGK5	Cluster3
F1R378	nenf	Cluster3
Q4QRD9	chordc1a	Cluster3
Q7ZSY3	smarca4a	Cluster3
E7FA20	si:ch211-256m1.8	Cluster3
A8WHP4	gclm	Cluster3
F1QE13	exoc8	Cluster3
Q7T387	abhd14b	Cluster3
O42376	mapk12	Cluster3
A0A0R4IVY5	rock1	Cluster3
F1QZX2	ca4a	Cluster3
B8JMD7	fryl	Cluster3
F1Q4X3	si:dkey-222n6.2	Cluster3
A0A2R8RIN9	A0A2R8RIN9	Cluster3
F1R008	actr10	Cluster3
F1QRB4	sec24d	Cluster3
F1R8M8	rsl1d1	Cluster3
H0WET3	H0WET3	Cluster3
Q6NZV1	pdpk1b	Cluster3
F1R2J2	arhgap1	Cluster3
A0A0R4IDS0	apoa4a	Cluster3
F1QWW6	dnajc11a	Cluster3
A0A0R4IU93	aspg	Cluster3
F1QMR6	nckipsd	Cluster3
F1Q8L1	dnah7	Cluster3
Q90ZL2	lancl1	Cluster3
A0A0R4IIC4	dennd4c	Cluster3
A0A0R4IAT5	col10a1b	Cluster3
F1QLH7	znf598	Cluster3
E7FFJ5	rpusd2	Cluster3
E7FGT8	dnah10	Cluster3
Q4V8U4	pdf	Cluster3
A0A2R8QG79	dync2h1	Cluster3
F1Q8W0	cactin	Cluster3
F1QF42	cntrl	Cluster3
F1Q8U0	hook2	Cluster3
A8WIN6	mfn2	Cluster3
R4GEZ2	si:ch211-132g1.3	Cluster3
A0A2R8QHK3	A0A2R8QHK3	Cluster3
F8W4K8	gpx7	Cluster3
A0A0R4IFA2	A0A0R4IFA2	Cluster3
E7F0I2	dock9b	Cluster3
E7F5M0	nup214	Cluster3
A0A0R4IY72	zc3h13	Cluster3
E7F646	plcd4b	Cluster3
Q5TZC7	asap2b	Cluster3
E7EZM1	gba	Cluster3
A0A0R4IIH4	fyco1a	Cluster3
F1QC17	emilin1a	Cluster3
X1WDX0	pla2g4f.1	Cluster3
A2CF32	glipr2	Cluster3
E7FDL3	si:ch211-136m16.8	Cluster3
X1WBG6	X1WBG6	Cluster3
Q5TZH6	msrb3	Cluster3
A0A2R8QLA8	kti12	Cluster3
A0A2R8Q886	gpc1b	Cluster3
A2CEA7	rasgrf2	Cluster3
F1QQA2	polr3b	Cluster3
Q4U0S5	paf1	Cluster3
Q90ZZ7	aldh3b1	Cluster3
F1REM1	F1REM1	Cluster3
A0A2R8QTI0	nsd1a	Cluster3
A0A2R8Q7T0	fes	Cluster3
A0A0G2L6S5	A0A0G2L6S5	Cluster3
A0A0G2L6F5	smchd1	Cluster3
F1QU92	F1QU92	Cluster3
E7FC22	rin3	Cluster3
F1QIJ5	LOC556989	Cluster3
A9JRD1	A9JRD1	Cluster3
F1QYX1	myo10l3	Cluster3
A0A0R4INV4	A0A0R4INV4	Cluster3
B0S5H7	B0S5H7	Cluster3
Q4KMD2	exosc3	Cluster3
E7F4P5	E7F4P5	Cluster3
F1QDP4	tut7	Cluster3
E7F2A3	E7F2A3	Cluster3
Q1RLU9	Q1RLU9	Cluster3
Q29RA3	dusp29	Cluster3
B8JHR8	pibf1	Cluster3
Q5W7F1	Q5W7F1	Cluster3
X1WEK5	relb	Cluster3
A0A0R4IU41	A0A0R4IU41	Cluster3
A0A2R8RYU1	A0A2R8RYU1	Cluster3
A0A0R4IFE3	zer1	Cluster3
E7EXD4	plk2a	Cluster3
A0A0R4IBF9	si:dkey-73p2.2	Cluster3
A0A2R8QAT4	LOC101886910	Cluster3
F1QN33	znf106a	Cluster3
F1R7W6	oxsm	Cluster3
A0A2R8QEK3	tomm20a	Cluster3
A0A2R8Q3S2	plin1	Cluster3
A0A2R8QQX6	chrnb1	Cluster3
F1QCK5	abi3b	Cluster3
A0A2R8QPY5	sfxn4	Cluster3
F1R4M9	mctp2a	Cluster3
A0A2R8Q327	A0A2R8Q327	Cluster3
A0A286Y9A0	LOC100151570	Cluster3
A0A0G2LAC3	ninl	Cluster3
A0A0R4IT71	fnip1	Cluster3
F1R778	mastl	Cluster3
F1QIA9	pkd1a	Cluster3
F1QI79	F1QI79	Cluster3
X1WBY6	bach1a	Cluster3
A0A286Y857	daam2	Cluster3
A0A0G2KL83	A0A0G2KL83	Cluster3
E9QGF9	arhgap31	Cluster3
E7F0X8	stard9	Cluster3
A2BIN4	srek1	Cluster3
A0A2R8QJS2	A0A2R8QJS2	Cluster3
Q5RIC0	elp3	Cluster3
Q5XJB9	adprhl1	Cluster3
A0A0R4IUT7	iqsec3a	Cluster3
F1RAC6	syne2b	Cluster3
F1QI87	gon4l	Cluster3
A0A0R4ISZ8	A0A0R4ISZ8	Cluster3
F1QXJ6	lrriq1	Cluster3
A0A2R8QCY5	si:rp71-68n21.9	Cluster3
F1QSY5	F1QSY5	Cluster3
B0S7E7	acsbg2	Cluster3
Q803Y0	Q803Y0	Cluster3
B0S7D7	skia	Cluster3
Q5RH88	kcnj8	Cluster3
Q6DC58	tmem223	Cluster3
P86839	nes	Cluster3
E7FA74	mdc1	Cluster3
A0A2R8Q8A5	A0A2R8Q8A5	Cluster3
F1QCS4	F1QCS4	Cluster3
F1QBP6	mcf2b	Cluster3
Q5ICW6	pcdh15a	Cluster3
F6NI81	hoxc10a	Cluster3
F1QQG3	trim35-39	Cluster3
A0A2R8Q0M3	cps1	Cluster3
F1R3J4	si:ch211-220f16.2	Cluster3
A0A286Y8A8	A0A286Y8A8	Cluster3
A0A0R4IG34	A0A0R4IG34	Cluster3
X1WF51	ncam3	Cluster3
F1R777	mettl3	Cluster3
F1RB13	msl1a	Cluster3
F1Q6C1	shroom4	Cluster3
F1RA30	evi5a	Cluster3
T1ECU9	T1ECU9	Cluster3
F1RCP2	osbpl7	Cluster3
Q90Y50	cxadr	Cluster3
A0A2R8QJ48	A0A2R8QJ48	Cluster3
A0A2R8Q9J8	LOC100000713	Cluster3
F1R254	agap2	Cluster3
F1RBF1	F1RBF1	Cluster3
B0UY61	neb	Cluster4
F1R6C7	myha	Cluster4
Q6IQX1	myhz2	Cluster4
B8A569	myhz1.3	Cluster4
B8A561	myhz1.2	Cluster4
E7FAD0	myhz1.1	Cluster4
B3DFS9	myh11a	Cluster4
F1R617	myo1b	Cluster4
A0A0R4IPW9	myo5b	Cluster4
F6NRG0	col6a3	Cluster4
F1QYN0	c3a.4	Cluster4
Q7ZVK9	tpm1	Cluster4
F1RBP8	F1RBP8	Cluster4
F1R833	nrap	Cluster4
F1R4U6	si:ch211-14a17.10	Cluster4
A0A2R8QNU4	si:ch211-14a17.10	Cluster4
A0A2R8Q860	hspa8	Cluster4
F8W3L1	F8W3L1	Cluster4
A0A0R4IFJ4	pcxa	Cluster4
F1Q781	mvp	Cluster4
F1Q9U6	adssl	Cluster4
E7FC32	tubb1	Cluster4
F1QZU7	aldh2.2	Cluster4
E9QB41	myl6	Cluster4
F1QZL6	gpia	Cluster4
Q6TNP9	tuba5	Cluster4
F1QXP5	mthfd1b	Cluster4
A0A0R4II89	cat	Cluster4
A0A2R8RTT5	uggt1	Cluster4
Q8UVX0	piwil1	Cluster4
A0A2R8RX09	A0A2R8RX09	Cluster4
A0A2R8RJH3	adsl	Cluster4
Q6NY81	ehd1a	Cluster4
A0A2R8QH90	wu:fb16f03	Cluster4
E7F071	hnrnpul1l	Cluster4
F1Q5K3	sardh	Cluster4
F1Q883	pgd	Cluster4
B0UYD7	B0UYD7	Cluster4
Q5RI09	tprb	Cluster4
A4FUM8	atp6v1b2	Cluster4
A0A2R8PX39	A0A2R8PX39	Cluster4
A0A0R4IPW4	A0A0R4IPW4	Cluster4
A0A0R4IC19	A0A0R4IC19	Cluster4
A0A286Y8E9	xpnpep1	Cluster4
B8A5M6	pdia2	Cluster4
B8JLC8	rab1aa	Cluster4
Q5RHR0	parp1	Cluster4
A5WVI9	dnaja2b	Cluster4
A0A0G2KQA6	sept4b	Cluster4
B3DFU8	LOC563448	Cluster4
F1R6R9	tns3.2	Cluster4
A8WGP7	ugdh	Cluster4
Z4YJ58	pter	Cluster4
I3IRW7	abat	Cluster4
B0S5H1	B0S5H1	Cluster4
Q1L907	gstr	Cluster4
A0A0R4IN76	gbe1b	Cluster4
B2ZZ14	map1b	Cluster4
A0A140LGY7	map1aa	Cluster4
A0A0R4IYL8	tpra	Cluster4
Q7ZZ76	Q7ZZ76	Cluster4
Q6NYR0	shmt1	Cluster4
A2AWE1	prdx1	Cluster4
F1QTB5	rpn1	Cluster4
A0A2R8QB05	A0A2R8QB05	Cluster4
A0A0R4IGU0	cnn1b	Cluster4
F6NPB1	erlin2	Cluster4
E7F0T7	gnb4a	Cluster4
F1QYK9	myl9a	Cluster4
B3DKC6	myl12.2	Cluster4
Q6IQ92	tnni4b.2	Cluster4
A0A1D5NS76	tjp1b	Cluster4
A0A0R4IL00	A0A0R4IL00	Cluster4
F1QVU3	vil1	Cluster4
Q58EB4	hibch	Cluster4
Q6TLF6	Q6TLF6	Cluster4
F1QMH0	csrp1b	Cluster4
A0A2R8QDD8	ppm1aa	Cluster4
Q5U386	ppm1bb	Cluster4
A0A0R4IC35	ogal	Cluster4
F1QHK0	pgm3	Cluster4
Q1L8L9	ak2	Cluster4
A3KQK2	asns	Cluster4
Q6P943	stat1a	Cluster4
F1Q4Y0	arhgef1b	Cluster4
Q6DGL3	gstz1	Cluster4
X1WD04	X1WD04	Cluster4
A0A0R4INK2	uap1	Cluster4
Q08C49	prkar1b	Cluster4
A0A0R4ISJ3	xrn2	Cluster4
Q7SXP4	srsf1a	Cluster4
B8JLL1	umps	Cluster4
A2BG80	ppp2r2ab	Cluster4
A0A2U3TVM3	nckap1	Cluster4
Q5YKG3	gna13a	Cluster4
F8W621	tpmt.2	Cluster4
F1QY25	F1QY25	Cluster4
F1QGI4	npm1a	Cluster4
B0UXN0	qsox1	Cluster4
Q8AYH1	hsd17b4	Cluster4
Q7ZUQ3	stk3	Cluster4
F1R3G8	srm	Cluster4
A0A2R8QTW5	golga4	Cluster4
A0A2R8Q108	rpn2	Cluster4
A0A0R4IDB7	cdc42bpaa	Cluster4
Q5MPX4	tfr1a	Cluster4
F1QJD8	F1QJD8	Cluster4
A0A0R4IU05	ap1g1	Cluster4
E7F3I8	dhx15	Cluster4
B0UYA3	cryl1	Cluster4
Q567X3	gnpda1	Cluster4
Q5TZ72	pfas	Cluster4
A0A2R8Q3W5	tap1	Cluster4
F1QYC7	haao	Cluster4
Q7SZE3	llgl2	Cluster4
E9QCU8	myo6a	Cluster4
A0A2R8QJG5	si:dkey-162b23.4	Cluster4
A0A2R8QPX7	A0A2R8QPX7	Cluster4
B0S5M0	snx4	Cluster4
F1R6L2	hip1	Cluster4
Q6P4V5	scp2a	Cluster4
F1RDQ9	ctsz	Cluster4
Q5PR60	Q5PR60	Cluster4
A0A0R4I9B2	pafah1b1b	Cluster4
F1QMC1	fam172a	Cluster4
A0A286Y8V9	lrba	Cluster4
Q6DBW5	lsm1	Cluster4
E7F3W3	nub1	Cluster4
A5WWG4	srsf3b	Cluster4
Q6NV35	gclc	Cluster4
A0A286Y919	myoz1b	Cluster4
A0A2R8RZX0	ipo4	Cluster4
E7FEZ9	atox1	Cluster4
A9C3Q7	amt	Cluster4
Q6DBV8	Q6DBV8	Cluster4
E7FDK2	mylkb	Cluster4
F1QU45	bco2a	Cluster4
A0A2R8QJH1	mtdha	Cluster4
F1RBT2	chd4b	Cluster4
A0A0R4IIP1	dus3l	Cluster4
F1QYP6	si:ch211-122f10.4	Cluster4
F1QGP1	aldh16a1	Cluster4
F1QQV6	aqr	Cluster4
A0A2R8QL69	hspa14	Cluster4
A5PMI3	nsun2	Cluster4
Q7T1D7	fmo5	Cluster4
A0A2R8Q7Z4	A0A2R8Q7Z4	Cluster4
A5WVQ1	caprin1b	Cluster4
A8WFT4	scly	Cluster4
A0A286YB68	rrbp1b	Cluster4
A0A2R8PXL7	scpep1	Cluster4
A8E7E7	itsn1	Cluster4
F1QIC0	cbsb	Cluster4
H9GXL1	zmp:0000001114	Cluster4
Q803L7	Q803L7	Cluster4
Q7ZW13	tnpo3	Cluster4
A0A0R4II16	psmf1	Cluster4
F1QYJ6	sult6b1	Cluster4
E7FAT1	dlg1	Cluster4
A5WUY4	smarca1	Cluster4
F1QJZ3	agmat	Cluster4
Q58EJ9	mtarc1	Cluster4
B6IDE7	frem2b	Cluster4
A0A0R4IBK5	rnf213a	Cluster4
F1QKU5	gfpt2	Cluster4
Q6PHE8	ccdc124	Cluster4
A5PN62	ddah2	Cluster4
A0A2R8Q8F4	A0A2R8Q8F4	Cluster4
A0A0R4IFJ1	dnajc7	Cluster4
Q6IVM1	rbp2b	Cluster4
X1WEV8	naa50	Cluster4
Q7ZU43	cpvl	Cluster4
A0A2R8QUH6	taok3a	Cluster4
Q6NWH0	Q6NWH0	Cluster4
A0A0R4IK10	f11r.1	Cluster4
Q7ZV25	tbca	Cluster4
Q6DG41	Q6DG41	Cluster4
F1R300	snrpa1	Cluster4
F1QKP8	rpz2	Cluster4
F1QHJ4	dap	Cluster4
B0R026	prmt5	Cluster4
F1QUP1	rpz	Cluster4
E7FGT2	h6pd	Cluster4
F1QLN6	c3a.5	Cluster4
E7F2B6	parga	Cluster4
Q5U3U0	phyhd1	Cluster4
F1R313	pex19	Cluster4
Q6P0U6	dnajc3a	Cluster4
B1H1H9	pus7	Cluster4
A0A2R8QIF2	exoc3	Cluster4
B0UYJ6	comta	Cluster4
A0A2R8RXS8	snap23.1	Cluster4
Q7ZUT5	arpp19b	Cluster4
B8JIA7	eif4eb	Cluster4
F1QLV5	nqo1	Cluster4
F1QNL7	F1QNL7	Cluster4
A0A0R4IMM2	mrps7	Cluster4
Q66I21	aldh8a1	Cluster4
E7FFA5	ace	Cluster4
F1RE17	acad11	Cluster4
A0A0R4IF65	mcm2	Cluster4
Q1LY31	zpr1	Cluster4
A0A2R8QT99	abcd3a	Cluster4
B0S6K3	cacybp	Cluster4
A0A2R8Q185	A0A2R8Q185	Cluster4
B0S5N7	blvra	Cluster4
E9QCP2	mat2b	Cluster4
E7EXU2	gar1	Cluster4
Q5RGX4	tmpoa	Cluster4
A0A2R8RPE6	tdrd3	Cluster4
E7EZW6	srpra	Cluster4
A0A0R4IG08	A0A0R4IG08	Cluster4
Q6P0C5	rpf2	Cluster4
P58239	cnmd	Cluster4
A0A2R8QMW0	A0A2R8QMW0	Cluster4
Q6DI06	timm10	Cluster4
E9QDR6	si:ch211-183d21.1	Cluster4
Q7SXF2	ubl5	Cluster4
Q5TYW4	nbas	Cluster4
F1Q5D8	vtnb	Cluster4
E9QDD7	itga1	Cluster4
E7FE01	dis3	Cluster4
E7EYC3	znf318	Cluster4
B8A566	dab2	Cluster4
A1IH00	golga2	Cluster4
A0A2R8Q290	pdap1a	Cluster4
A0A0G2KWG8	hectd4	Cluster4
F1QSL6	fbxo44	Cluster4
A0A0R4IRF2	clca1	Cluster4
A0A0R4ILM0	si:ch211-194m7.8	Cluster4
Q6PBI6	pcbd1	Cluster4
F1RB36	hacl1	Cluster4
A0A0R4INN3	agxt2	Cluster4
F1QJX5	ubr3	Cluster4
F1QEP5	msh2	Cluster4
F1QC46	nup210	Cluster4
Q6J2R6	gsdmeb	Cluster4
A0A2R8QL83	lmf2b	Cluster4
F1RC32	napga	Cluster4
A0A1D5NSE1	dgkza	Cluster4
F1RAM9	tmed7	Cluster4
Q6P3I0	heatr3	Cluster4
Q6NWJ2	spcs3	Cluster4
A0A0R4IXF0	fadd	Cluster4
Q1LWP9	neu1	Cluster4
Q6QA33	hsd17b12b	Cluster4
Q6PFI8	tspy	Cluster4
F1QW85	F1QW85	Cluster4
F1QSW9	prxl2b	Cluster4
A5WWJ6	yrk	Cluster4
F1QDL0	ptpn1	Cluster4
E7EYJ7	erbin	Cluster4
A0A0R4ILC0	poldip3	Cluster4
E9QDE9	rabgap1l	Cluster4
A0A0G2L8S7	A0A0G2L8S7	Cluster4
A0A0R4IY13	si:ch1073-416d2.3	Cluster4
Q8AYB8	hopx	Cluster4
E7FE33	farp2	Cluster4
Q08BV5	rangap1a	Cluster4
A0A0G2L9C0	A0A0G2L9C0	Cluster4
A0A0R4IY57	si:ch73-359m17.2	Cluster4
B0UXL9	B0UXL9	Cluster4
Q5BLE6	Q5BLE6	Cluster4
Q9IB47	copz2	Cluster4
F1QDA2	napsa	Cluster4
F1QPB5	sept5a	Cluster4
A2BIM6	smap1	Cluster4
F1QB07	dnah3	Cluster4
Q1ED27	dnajc8	Cluster4
A0A0R4IXD6	ela2	Cluster4
A0A2R8S0I4	ascl1b	Cluster4
Q5U3V9	snf8	Cluster4
Q66HU5	hat1	Cluster4
A0A0R4IRL6	slc27a4	Cluster4
Q7ZUL7	rbpms2b	Cluster4
A0A2R8Q606	nupr1b	Cluster4
A0A2R8QGI6	A0A2R8QGI6	Cluster4
A0A2R8QG76	tsnax	Cluster4
A0A2R8QAX6	A0A2R8QAX6	Cluster4
F1QNX7	upf3b	Cluster4
B0S631	si:dkeyp-73d8.6	Cluster4
E7EXN4	stx10	Cluster4
A0A2R8QMA4	tdrd1	Cluster4
B0UXS0	hmox1a	Cluster4
A0A2R8PV02	A0A2R8PV02	Cluster4
A0A0R4IRS8	ssr1	Cluster4
F1R676	pofut1	Cluster4
F1RBN1	scfd2	Cluster4
Q5BKW9	asrgl1	Cluster4
B0JZL9	ube2z	Cluster4
A0A2R9YJJ0	tbl1xr1a	Cluster4
B8JJQ4	si:dkey-275b16.2	Cluster4
E7F1Q7	zranb2	Cluster4
F1RE23	commd3	Cluster4
F1QNI2	crlf3	Cluster4
A2BGP9	fam151b	Cluster4
F8W411	rad50	Cluster4
F1RAW8	ash2l	Cluster4
A0A0R4INC0	eml1	Cluster4
A2BIE9	qdprb1	Cluster4
F1RE04	trappc12	Cluster4
F1RB27	appl2	Cluster4
A0A2R8Q6L8	skiv2l	Cluster4
Q6IQJ1	tomm22	Cluster4
F1QRR5	gcsha	Cluster4
A0A0G2L7C5	si:dkey-185m8.2	Cluster4
A0A2R8QJT7	cadpsa	Cluster4
A0A0J9YIG5	sec61a1l	Cluster4
Q6TNR0	rnaseh2a	Cluster4
A0A0G2L9G1	arfgap1	Cluster4
Q7T326	cisd2	Cluster4
A4IG09	ftr83	Cluster4
Q6NWG1	lrrc59	Cluster4
Q503S3	golph3	Cluster4
A5WV48	arsa	Cluster4
Q7SXS9	ppp1r8b	Cluster4
E7F897	cpb2	Cluster4
A0A0R4IUZ0	lztfl1	Cluster4
A0A2R8QCY3	ttll12	Cluster4
F2XG13	soul4	Cluster4
X1WCJ5	ppfia3	Cluster4
F1QE34	ankmy2a	Cluster4
F8W580	kmt2bb	Cluster4
X1WH03	abraa	Cluster4
F1R237	tdrd6	Cluster4
B3DIE0	atf7a	Cluster4
E7F496	E7F496	Cluster4
Q7ZVN6	rbm17	Cluster4
F1Q8Z1	dock7	Cluster4
Q7ZVX9	txndc9	Cluster4
A0A2R8RKJ4	si:dkey-25o16.4	Cluster4
E7F6M0	E7F6M0	Cluster4
Q4V9I5	srp14	Cluster4
R4GEJ0	usp16	Cluster4
A0A0A0MPL4	stx7l	Cluster4
A0A2R8QD37	buc	Cluster4
F1QKH9	rdh1	Cluster4
A0A140LGB4	A0A140LGB4	Cluster4
A0A0R4IQD6	A0A0R4IQD6	Cluster4
A0A0R4IKF7	suox	Cluster4
Q5RIC5	mcm3	Cluster4
A0A0R4IAE0	msh6	Cluster4
A0A0R4IYB5	si:ch211-194m7.5	Cluster4
Q68EI0	wdr18	Cluster4
F1QYH5	zw10	Cluster4
A0A2R8QEQ1	kynu	Cluster4
Q504I6	rpa2	Cluster4
A0JMP5	aoc1	Cluster4
B8XY56	rnaset2	Cluster4
A0A0R4IEI2	si:ch211-127i16.2	Cluster4
A0A0R4IEX1	cep192	Cluster4
Q1L994	ppp1r37	Cluster4
F1QPC1	cyp3c1	Cluster4
Q6NYN9	nup54	Cluster4
A2BIA5	bloc1s2	Cluster4
T1ECW3	ranbp10	Cluster4
F1QES8	fybb	Cluster4
F1R7L3	bysl	Cluster4
F1R8T1	pfkfb4a	Cluster4
X1WB77	X1WB77	Cluster4
F1QGN0	fnbp4	Cluster4
F1QLC8	adob	Cluster4
F1QJ48	mrrf	Cluster4
F1R2W1	dhrs13a.3	Cluster4
Q5RHM0	pla2g7	Cluster4
F1Q653	ptpn23a	Cluster4
Q7SX76	fgfrl1a	Cluster4
Q6IQL3	ppil3	Cluster4
Q1L8Y7	shoc2	Cluster4
A0A2R8RUD4	nfkbiab	Cluster4
A0A2R8QMI4	pafah1b3	Cluster4
A0A0G2KHM6	pxdn	Cluster4
A9C3P6	A9C3P6	Cluster4
A0A2R8QCE2	endou	Cluster4
F1QEL0	tmem214	Cluster4
F1R1N7	cdc6	Cluster4
F1QJB6	atm	Cluster4
Q5RGW0	uhrf1bp1l	Cluster4
A0A0R4IIK5	ecm1b	Cluster4
F1R3W7	xylb	Cluster4
F1QW40	F1QW40	Cluster4
F1QAA1	pcdh7a	Cluster4
E7F3D6	scyl1	Cluster4
F1RCF0	vmo1b	Cluster4
F1QHD9	vipb	Cluster4
I3ISS4	oxr1b	Cluster4
B8JL27	galnt7	Cluster4
F1QDL2	nsa2	Cluster4
A0A0R4IRT6	mrps16	Cluster4
F1R1I5	cgnl1	Cluster4
A2ATX2	A2ATX2	Cluster4
B0S525	igfbp5b	Cluster4
E7EZP8	tmx3b	Cluster4
A0A2R8RU51	alcama	Cluster4
A0A2R8QAN7	asxl2	Cluster4
E7F350	dis3l2	Cluster4
A0A2R8RUC7	timeless	Cluster4
A0A2R8QD69	med13a	Cluster4
A0A2R8PZS5	tasorb	Cluster4
Q1LUX9	tbxas1	Cluster4
Q0H2G3	aldh1a3	Cluster4
A4QNZ7	p33monox	Cluster4
F1Q5H5	asxl1	Cluster4
A0A2R8RX97	A0A2R8RX97	Cluster4
F1QMM7	F1QMM7	Cluster4
B0V199	hacd2	Cluster4
Q08BX0	rab21	Cluster4
A0A2R8QBK5	rps6kb1b	Cluster4
A0A2R8QT01	rangap1b	Cluster4
A0A2R8QIW3	pmt	Cluster4
Q7ZZ03	fuom	Cluster4
F1R684	F1R684	Cluster4
A3KQ59	usp39	Cluster4
F1QD40	mtif2	Cluster4
F1QDN6	agpat5	Cluster4
Q1LX65	si:ch211-216l23.2	Cluster4
F1RET2	smyd5	Cluster4
F1QR78	psmb10	Cluster4
Q6DHB9	sccpdha.1	Cluster4
A0A2R8RQB0	A0A2R8RQB0	Cluster4
A0A0N4STS3	si:ch1073-376c22.1	Cluster4
B0S5C4	acsl3b	Cluster4
E7F5W0	gba2	Cluster4
Z4YHZ5	Z4YHZ5	Cluster4
E7F7T9	efhb	Cluster4
F1QMW2	xiap	Cluster4
F1Q618	si:ch1073-335m2.2	Cluster4
Q5RHK5	mtmr9	Cluster4
A0A2R8Q4J5	fat4	Cluster4
Q7ZV20	rrp15	Cluster4
F1RAH8	rbmx2	Cluster4
H9BFW7	cmasb	Cluster4
A0A0R4ITZ2	vac14	Cluster4
F1QHZ3	ttc4	Cluster4
Q5RIK1	ftr97	Cluster4
A0A2R8QIZ3	meis1b	Cluster4
X1WEF5	trim35-13	Cluster4
Q501V7	Q501V7	Cluster4
E7FGK0	osbpl5	Cluster4
E7FGD0	aifm4	Cluster4
A5D6T0	vps16	Cluster4
A0A0G2L8C2	ap3b2	Cluster4
A9C3Q6	ift81	Cluster4
Q6DGH3	sec61b	Cluster4
B7ZV80	kif22	Cluster4
A0A0R4IA42	A0A0R4IA42	Cluster4
A2CF23	A2CF23	Cluster4
Q0P3U6	lcn15	Cluster4
Q5TZA5	ubr7	Cluster4
A0A0R4IY52	vps52	Cluster4
E7F1J7	E7F1J7	Cluster4
Q1LUW0	rbm28	Cluster4
Q567B1	yod1	Cluster4
F1QCY5	kank3	Cluster4
Q1L8C9	si:ch211-107n13.1	Cluster4
B0S6T2	B0S6T2	Cluster4
E7EXJ6	nup188	Cluster4
F1QUS2	cdh23	Cluster4
F1R8U1	mospd2	Cluster4
A0A0R4IV56	cyp2aa9	Cluster4
Q0P464	mthfsd	Cluster4
A5D6S0	sin3aa	Cluster4
F1R019	sos2	Cluster4
F1R9L2	F1R9L2	Cluster4
F1QDF0	kif20a	Cluster4
Q1LUU7	kifc1	Cluster4
A0A0R4IV90	exosc4	Cluster4
E7F2R8	apoda.2	Cluster4
E7FFQ2	si:dkey-219c3.2	Cluster4
Q5RGE5	dclre1c	Cluster4
F1R3T4	galk1	Cluster4
Q1LYE0	swap70b	Cluster4
E7F1B1	E7F1B1	Cluster4
F1QB48	ppfibp2b	Cluster4
A0A0R4ITS5	A0A0R4ITS5	Cluster4
A0A2R8QHZ9	A0A2R8QHZ9	Cluster4
E9QII6	E9QII6	Cluster4
B0S737	inpp4aa	Cluster4
A0A0R4IFN9	A0A0R4IFN9	Cluster4
F1QSV4	F1QSV4	Cluster4
F1QWM0	F1QWM0	Cluster4
A0A0R4IML8	thumpd1	Cluster4
E7F9K2	E7F9K2	Cluster4
A0A0R4IZN1	btr24	Cluster4
F1QC62	pho	Cluster4
A3KPR1	wdr36	Cluster4
E9QG91	kdm6bb	Cluster4
F1QVC8	LOC100004411	Cluster4
F1QGD9	trmt1	Cluster4
A0A2R8RKF4	atp9a	Cluster4
F1R1W9	zmp:0000000912	Cluster4
Q8JI13	Q8JI13	Cluster4
B0UYI3	mrpl37	Cluster4
A0A2R8QBF4	A0A2R8QBF4	Cluster4
A0A0R4IIN5	cfhl3	Cluster4
E7F254	cpda	Cluster4
Q7SY45	vti1b	Cluster4
B8A4H3	knop1	Cluster4
F1Q965	her8.2	Cluster4
F1QFE5	trmt6	Cluster4
E7F4B5	si:dkey-27o4.1	Cluster4
Q7ZVM1	washc5	Cluster4
F1QV93	helz2b	Cluster4
F6NVC8	si:ch211-173p18.3	Cluster4
Q32LQ2	maip1	Cluster4
B0R0W9	tbc1d8b	Cluster4
B0S7S1	B0S7S1	Cluster4
F1QLM2	si:ch73-314g15.3	Cluster4

## Sheet: Ubiquitylome
Ub identifier	Protein accession number	Modified site	Gene	Cluster
A0A0N4SUC0_K494k_1_1_494_494	A0A0N4SUC0	K494k	abcc3	Cluster1
A0A0R4I9S7_K1196k_1_1_1196_1196	E7F371	K1196k	A0A0R4I9S7_K1196k_1_1_1196_1196	Cluster1
A0A0R4IA72_K3473k_1_1_3473_3473	Q5RGQ4	K3473k	A0A0R4IA72_K3473k_1_1_3473_3473	Cluster1
A0A2R8Q5K7_K140k_1_1_140_140	A0A2R8Q5K7	K140k	dpysl5a	Cluster1
A0A2R8QI77_K4058kK4072k_2_0_4055_4058	A0A2R8QI77	K4058k K4072k	prx	Cluster1
A0A2R8QI78_K16k_1_1_16_16	Q803E5	K16k	A0A2R8QI78_K16k_1_1_16_16	Cluster1
A0A2R8RTK5_K31k_1_1_31_31	Q6PI52	K31k	A0A2R8RTK5_K31k_1_1_31_31	Cluster1
A1A5V7_K81kK87k_2_2_81_87	A1A5V7	K81k M83m K87k	A1A5V7_K81kK87k_2_2_81_87	Cluster1
A2BGX6_K1197k_1_1_1197_1197	A2BGX6	K1197k	myhc4	Cluster1
A2BGX6_K1786k_1_1_1786_1786	A2BGX6	K1786k	myhc4	Cluster1
A6NA21_K141kK147k_2_2_141_147	A6NA21	K141k K147k	cavin1b	Cluster1
B8JIS1_K244k_1_1_244_244	B8JIS1	K244k	atp5pb	Cluster1
B8JL29_K147k_1_1_147_147	B8JL29	K147k	hmgb2a	Cluster1
B8JLJ8_K61k_1_1_61_61	B8JLJ8	K61k	hnrpkl	Cluster1
E7F0K3_K240k_1_1_240_240	E7F0K3	K240k	cavin1a	Cluster1
E7F354_K142k_1_1_142_142	E7F354	K142k	ywhag2	Cluster1
E7FA22_K43k_1_1_43_43	E7FA22	K43k	ptp4a3b	Cluster1
E7FCS1_K91k_1_1_91_91	E7FCS1	K91k	phyh	Cluster1
F1QAU9_K2120k_1_1_2120_2120	F1QAU9	K2120k	dspb	Cluster1
F1QPY7_K3k_1_1_3_3	F1QPY7	K3k	snrpg	Cluster1
F1QQW9_K55k_1_1_55_55	F1QQW9	K55k	si:dkey-37o8.1	Cluster1
F1QZ50_K3016k_1_1_3016_3016	F1QZ50	K3016k	ahnak	Cluster1
F1R246_K19k_1_1_19_19	F1R246	K19k	dars1	Cluster1
F1R7N8_K7412k_1_1_7412_7412	F1R7N8	K7412k	ttn.2	Cluster1
F8W2I6_K10k_1_1_10_10	F8W2I6	K10k	F8W2I6_K10k_1_1_10_10	Cluster1
G1K2X0_K4501k_1_1_4501_4501	G1K2X0	K4501k	ttn.1	Cluster1
I3ISS5_K477k_1_1_477_477	F1QUS9	K477k	I3ISS5_K477k_1_1_477_477	Cluster1
K7DY73_K230k_1_1_230_230	K7DY73	K230k	hao1	Cluster1
Q1RLX4_K1119k_1_1_1119_1119	Q1RLX4	K1119k	trappc11	Cluster1
Q3ZB92_K346k_1_1_346_346	Q3ZB92	K346k	prkacbb	Cluster1
Q567N5_K184k_1_1_184_184	Q567N5	K184k	rpl6	Cluster1
Q5TZD3_K168k_1_1_168_168	Q5TZD3	K168k	si:dkey-239i20.2	Cluster1
Q6AZC1_K402k_1_1_402_402	Q6AZC1	K402k	psmc5	Cluster1
Q6IQB1_K228k_1_1_228_228	Q6IQB1	K228k	rpl5b	Cluster1
Q6IQB1_K41k_1_1_41_41	Q6IQB1	K41k	rpl5b	Cluster1
Q6IQX1_K574k_1_1_574_574	Q6IQX1	K574k	myhz2	Cluster1
Q6NSN2_K50k_1_1_50_50	Q6NSN2	K50k	mao	Cluster1
Q6NV37_K24k_1_1_24_24	Q6NV37	K24k	gyg1a	Cluster1
Q6NYR0_K454k_1_1_454_454	Q6NYR0	K454k	shmt1	Cluster1
Q6P102_K9k_1_1_9_9	Q6P102	K9k	ywhabl	Cluster1
Q6P4V5_K535k_1_1_535_535	Q6P4V5	K535k	scp2a	Cluster1
Q6PBY3_K145k_1_1_145_145	Q6PBY3	K145k	edf1	Cluster1
Q6PC01_K125k_1_1_125_125	Q6PC01	K125k	faua	Cluster1
Q6PC90_K129k_1_1_129_129	Q6PC90	K129k	rps12	Cluster1
Q6TNT9_K438k_1_0_437_438	Q6TNT9	K438k	gdi2	Cluster1
Q6YI49_K19k_1_1_19_19	Q6YI49	K19k	uchl1	Cluster1
Q7SXA3_K29k_1_1_29_29	Q7SXA3	K29k	rps27a	Cluster1
Q7T1J9_K139k_1_1_139_139	Q7T1J9	K139k	rps10	Cluster1
Q7T334_K77k_1_1_77_77	Q7T334	K77k	mdh2	Cluster1
Q7ZUI0_K228k_1_1_228_228	Q7ZUI0	K228k	rpl5a	Cluster1
Q803Q7_K330k_1_1_330_330	Q803Q7	K330k	aldoaa	Cluster1
Q803T5_K189k_1_1_189_189	Q803T5	K189k	ahcy	Cluster1
Q9I8V0_K28k_1_1_28_28	Q9I8V0	K28k	pvalb2	Cluster1
Q9I8V0_K33k_1_1_33_33	Q9I8V0	K33k	pvalb2	Cluster1
Q9I8V0_K46k_1_1_46_46	Q9I8V0	K46k	pvalb2	Cluster1
A0A0N4STT5_K661k_1_1_661_661	A0A0N4SU68	K661k	A0A0N4STT5_K661k_1_1_661_661	Cluster2
A0A0R4IA72_K1220k_1_1_1220_1220	Q5RGQ4	K1220k	A0A0R4IA72_K1220k_1_1_1220_1220	Cluster2
A0A0R4IGP9_K277k_1_1_277_277	A0A0R4IGP9	K277k	A0A0R4IGP9_K277k_1_1_277_277	Cluster2
A0A0R4IGQ8_K201k_1_1_201_201	A0A0R4IGQ8	K201k	myom1b	Cluster2
A0A0R4IH04_K164k_1_1_164_164	A0A0R4IH04	K164k	aglb	Cluster2
A0A0R4IHV1_K183k_1_1_183_183	A0A0R4IHV1	K183k	pkmb	Cluster2
A0A0R4IHV1_K206k_1_1_206_206	A0A0R4IHV1	K206k	pkmb	Cluster2
A0A0R4J7R2_K1986k_1_1_1986_1986	A0A0R4J7R2	K1986k	myo18aa	Cluster2
A0A286YBP4_K47k_1_1_47_47	A0A286YBP4	K47k	A0A286YBP4_K47k_1_1_47_47	Cluster2
A0A2R8Q1X2_K426k_1_1_426_426	A0A2R8Q1X2	K426k	eno1a	Cluster2
A0A2R8Q483_K321k_1_1_321_321	A0A2R8Q483	K321k	vimr2	Cluster2
A0A2R8Q6L8_K212k_1_1_212_212	A0A2R8Q6L8	K212k	skiv2l	Cluster2
A0A2R8QHZ3_K1526k_1_1_1526_1526	A0A2R8QHZ3	K1526k	LOC100329748	Cluster2
A0A2R8QJH5_K101k_1_1_101_101	A0A0R4IDA7	K101k	A0A2R8QJH5_K101k_1_1_101_101	Cluster2
A0A2R8QRW5_K45k_1_1_45_45	A0A2R8QRW5	K45k	gstt2	Cluster2
A0A2R8RX09_K113k_1_1_113_113	A0A2R8RX09	K113k	A0A2R8RX09_K113k_1_1_113_113	Cluster2
A0A2R9YJH5_K291k_1_1_291_291	A0A2R9YJH5	K291k	ckmt2a	Cluster2
A2BGX6_K1581k_1_1_1581_1581	A2BGX6	K1581k	myhc4	Cluster2
A2BGX6_K1653k_1_1_1653_1653	A2BGX6	K1653k	myhc4	Cluster2
A2BGX6_K1772k_1_1_1772_1772	A2BGX6	K1772k	myhc4	Cluster2
A2BGX6_K1793k_1_1_1793_1793	A2BGX6	K1793k	myhc4	Cluster2
A2BGX6_K1808k_1_1_1808_1808	A2BGX6	K1808k	myhc4	Cluster2
A2BGX6_K659k_1_1_659_659	A2BGX6	K659k	myhc4	Cluster2
A2BGX6_K782k_1_1_782_782	A2BGX6	K782k	myhc4	Cluster2
A2BGX6_K805k_1_1_805_805	A2BGX6	K805k	myhc4	Cluster2
A2BIR4_K181k_1_1_181_181	A2BIR3	K181k	A2BIR4_K181k_1_1_181_181	Cluster2
A9JRG7_K378k_1_1_378_378	A9JRG7	K378k	A9JRG7_K378k_1_1_378_378	Cluster2
B0S553_K237k_1_1_237_237	B0S553	K237k	nefmb	Cluster2
B0UY61_K4545k_1_1_4545_4545	B0UY61	K4545k	neb	Cluster2
B0UY61_K5541k_1_1_5541_5541	B0UY61	K5541k	neb	Cluster2
B0UY61_K5746k_1_1_5746_5746	B0UY61	K5746k	neb	Cluster2
B0UY61_K5950k_1_1_5950_5950	B0UY61	K5950k	neb	Cluster2
B0UY61_K5959k_1_1_5959_5959	B0UY61	K5959k	neb	Cluster2
B3DK63_K192k_1_1_192_192	A0A0A0MPR4	K192k	B3DK63_K192k_1_1_192_192	Cluster2
B8JLS3_K757k_1_1_757_757	B8JLS3	K757k	myh6	Cluster2
D1GJ56_K104k_1_1_104_104	D1GJ56	K104k	actn3a	Cluster2
E7FAD0_K1353k_1_1_1353_1353	E7FAD0	K1353k	myhz1.1	Cluster2
E7FB37_K107k_1_1_107_107	E7FB37	K107k	ptbp3	Cluster2
E7FBD8_K304k_1_1_304_304	E7FBD8	K304k	nlrc3l1	Cluster2
E9QB46_K283k_1_1_283_283	E9QB46	K283k	selenbp1	Cluster2
E9QCU8_K1041k_1_1_1041_1041	E9QCU8	K1041k	myo6a	Cluster2
E9QEQ6_K174k_1_1_174_174	F1Q781	K174k	E9QEQ6_K174k_1_1_174_174	Cluster2
F1Q688_K298k_1_1_298_298	F1Q688	K298k	cavin2a	Cluster2
F1Q6R4_K84k_1_1_84_84	B0UY60	K84k	F1Q6R4_K84k_1_1_84_84	Cluster2
F1Q6Z7_K8k_1_1_8_8	F1Q6Z7	K8k	F1Q6Z7_K8k_1_1_8_8	Cluster2
F1QB54_K284k_1_1_284_284	F1QB54	K284k	pabpc1a	Cluster2
F1QFV2_K105k_1_1_105_105	F1QFV2	K105k	hnrnpa1b	Cluster2
F1QVX3_K1653k_1_1_1653_1653	F1QVX3	K1653k	myhb	Cluster2
F1QY24_K299k_1_1_299_299	F1QY24	K299k	agxta	Cluster2
F1QZ50_K1281k_1_1_1281_1281	F1QZ50	K1281k	ahnak	Cluster2
F1QZ50_K3969k_1_1_3969_3969	F1QZ50	K3969k	ahnak	Cluster2
F1QZQ0_K21126k_1_1_21126_21126	F1QZQ0	K21126k	ttn.2	Cluster2
F1R619_K283k_1_1_283_283	F1R619	K283k	col17a1b	Cluster2
F1R6C7_K1651k_1_1_1651_1651	F1R6C7	K1651k	myha	Cluster2
F1R7N8_K10004k_1_1_10004_10004	F1R7N8	K10004k	ttn.2	Cluster2
F1R7N8_K1369k_1_1_1369_1369	F1R7N8	K1369k	ttn.2	Cluster2
F1R7N8_K1537k_1_1_1537_1537	F1R7N8	K1537k	ttn.2	Cluster2
F1R7N8_K1768k_1_1_1768_1768	F1R7N8	K1768k	ttn.2	Cluster2
F1R7N8_K24086k_1_1_24086_24086	F1R7N8	K24086k	ttn.2	Cluster2
F1R7N8_K25940k_1_1_25940_25940	F1R7N8	K25940k	ttn.2	Cluster2
F1R7N8_K5543k_1_1_5543_5543	F1R7N8	K5543k	ttn.2	Cluster2
F1R7N8_K5809k_1_1_5809_5809	F1R7N8	K5809k	ttn.2	Cluster2
F1R7N8_K6607k_1_1_6607_6607	F1R7N8	K6607k	ttn.2	Cluster2
F1R7N8_K6636k_1_1_6636_6636	F1R7N8	K6636k	ttn.2	Cluster2
F1R7N8_K6650k_1_1_6650_6650	F1R7N8	K6650k	ttn.2	Cluster2
F1R7N8_K7232k_1_1_7232_7232	F1R7N8	K7232k	ttn.2	Cluster2
F1R7N8_K8981k_1_1_8981_8981	F1R7N8	K8981k	ttn.2	Cluster2
F1R7N8_K9117k_1_1_9117_9117	F1R7N8	K9117k	ttn.2	Cluster2
F1R972_K229k_1_1_229_229	F1R972	K229k	cavin4a	Cluster2
F8W4Q1_K1739k_1_1_1739_1739	F8W4Q1	K1739k	dspa	Cluster2
G1K2X0_K1541k_1_1_1541_1541	G1K2X0	K1541k	ttn.1	Cluster2
G1K2X0_K1772k_1_1_1772_1772	G1K2X0	K1772k	ttn.1	Cluster2
G1K2X0_K18036k_1_1_18036_18036	G1K2X0	K18036k	ttn.1	Cluster2
G1K2X0_K24580k_1_1_24580_24580	G1K2X0	K24580k	ttn.1	Cluster2
G1K2X0_K27325k_1_1_27325_27325	G1K2X0	K27325k	ttn.1	Cluster2
G1K2X0_K27662k_1_1_27662_27662	G1K2X0	K27662k	ttn.1	Cluster2
G1K2X0_K4449k_1_1_4449_4449	G1K2X0	K4449k	ttn.1	Cluster2
G1K2X0_K774k_1_1_774_774	G1K2X0	K774k	ttn.1	Cluster2
P13104_K226k_1_1_226_226	P13104	K226k	tpma	Cluster2
Q1LXK0_K265k_1_1_265_265	Q1LXK0	K265k	krt1-19d	Cluster2
Q3B732_K28k_1_1_28_28	Q3B732	K28k	hmgn2	Cluster2
Q5TZG5_K438k_1_1_438_438	Q5TZG5	K438k	ezrb	Cluster2
Q5XJS3_K48k_1_1_48_48	Q5XJS3	K48k	scp2b	Cluster2
Q5XJS4_K66kK75kK80k_3_0_55_66	E9QHJ1	K66k K75k K80k	rab34a	Cluster2
Q642H9_K155k_1_1_155_155	Q642H9	K155k	rps4x	Cluster2
Q66IB6_K137k_1_1_137_137	Q66IB6	K137k	hmgb2b	Cluster2
Q6A3P5_K30k_1_1_30_30	Q6A3P5	K30k	ndrg1a	Cluster2
Q6DHB6_K451k_1_1_451_451	Q6DHB6	K451k	krt91	Cluster2
Q6DRM4_K169k_1_1_169_169	Q6DRM4	K169k	parvaa	Cluster2
Q6NWF6_K237k_1_1_237_237	Q6NWF6	K237k	krt8	Cluster2
Q6P3G1_K807k_1_1_807_807	Q6P3G1	K807k	cp	Cluster2
Q6PBK3_K47k_1_1_47_47	Q6PBK3	K47k	rps28	Cluster2
Q6PC53_K144k_1_1_144_144	Q6PC53	K144k	ppiab	Cluster2
Q6PHI8_K251k_1_1_251_251	Q6PHI8	K251k	tktb	Cluster2
Q7T2P2_K380k_1_1_380_380	Q7T2P2	K380k	cct3	Cluster2
Q7ZU99_K651k_1_1_651_651	Q7ZU99	K651k	vcp	Cluster2
Q803T5_K319k_1_0_318_319	Q803T5	K319k	ahcy	Cluster2
Q804H2_K164k_1_1_164_164	Q804H2	K164k	anxa1a	Cluster2
Q8AX99_K100k_1_1_100_100	Q8AX99	K100k	actn3b	Cluster2
Q8AX99_K106k_1_1_106_106	Q8AX99	K106k	actn3b	Cluster2
Q8JH70_K330k_1_1_330_330	Q8JH70	K330k	aldocb	Cluster2
Q90XR8_K212k_1_1_212_212	Q90XR8	K212k	cldnb	Cluster2
Q92051_K50k_1_1_50_50	Q92051	K50k	cahz	Cluster2
Q98TZ8_K233k_1_1_233_233	Q98TZ8	K233k	flot2a	Cluster2
Q9I8U7_K83k_1_1_83_83	Q9I8U7	K83k	mylz3	Cluster2
Q9PVF8_K16k_1_1_16_16	Q9PVF8	K16k	ctnna1	Cluster2
R4GEZ5_K172kK176k_2_2_172_176	F1R5Y0	K172k K176k	si:zfos-364h11.2	Cluster2
A0A0N4STT5_K1283k_1_1_1283_1283	A0A0G2L6C1	K1283k	A0A0N4STT5_K1283k_1_1_1283_1283	Cluster3
A0A0N4STT5_K1810k_1_1_1810_1810	A0A0G2L6C1	K1810k	A0A0N4STT5_K1810k_1_1_1810_1810	Cluster3
A0A0N4STT5_K1818k_1_1_1818_1818	A0A0G2L6C1	K1818k	A0A0N4STT5_K1818k_1_1_1818_1818	Cluster3
A0A0N4STT5_K1842k_1_1_1842_1842	A0A0G2L6C1	K1842k	A0A0N4STT5_K1842k_1_1_1842_1842	Cluster3
A0A0N4STT5_K1852k_1_1_1852_1852	A0A0G2L6C1	K1852k	A0A0N4STT5_K1852k_1_1_1852_1852	Cluster3
A0A0N4STT5_K364k_1_1_364_364	A0A0G2L6C1	K364k	A0A0N4STT5_K364k_1_1_364_364	Cluster3
A0A0R4IA72_K1028k_1_1_1028_1028	Q5RGQ4	K1028k	A0A0R4IA72_K1028k_1_1_1028_1028	Cluster3
A0A0R4IA72_K2540k_1_1_2540_2540	Q5RGQ4	K2540k	A0A0R4IA72_K2540k_1_1_2540_2540	Cluster3
A0A0R4IEK3_K321k_1_1_321_321	A0A0R4IEK3	K321k	dlg1l	Cluster3
A0A0R4IFT8_K1340k_1_1_1340_1340	A0A0R4IFT8	K1340k	usp47	Cluster3
A0A0R4IGP9_K136k_1_1_136_136	A0A0R4IGP9	K136k	A0A0R4IGP9_K136k_1_1_136_136	Cluster3
A0A0R4IGQ8_K903k_1_1_903_903	A0A0R4IGQ8	K903k	myom1b	Cluster3
A0A0R4IGQ8_K956k_1_1_956_956	A0A0R4IGQ8	K956k	myom1b	Cluster3
A0A0R4ILA8_K67k_1_1_67_67	A0A0R4ILA8	K67k	psmc3	Cluster3
A0A0R4IM99_K205k_1_1_205_205	F1R412	K205k	A0A0R4IM99_K205k_1_1_205_205	Cluster3
A0A0R4IM99_K213k_1_1_213_213	Q6IQD7	K213k	A0A0R4IM99_K213k_1_1_213_213	Cluster3
A0A0R4IM99_K65k_1_1_65_65	Q6IQD7	K65k	A0A0R4IM99_K65k_1_1_65_65	Cluster3
A0A0R4IMS3_K69k_1_1_69_69	A0A0R4IMS3	K69k	rpl24	Cluster3
A0A0R4ISK8_K48k_1_1_48_48	Q6NW56	K48k	A0A0R4ISK8_K48k_1_1_48_48	Cluster3
A0A0R4ITP2_K117k_1_1_117_117	A0A0R4ITP2	K117k	atxn3	Cluster3
A0A0R4IWN8_K6k_1_1_6_6	A0A0R4IWN8	K6k	si:ch73-281n10.2	Cluster3
A0A0R4IYN3_K719k_1_1_719_719	E7FFW3	K719k	tnksb	Cluster3
A0A140LGX4_K695k_1_1_695_695	A0A140LGX4	K695k	obscnb	Cluster3
A0A1D5NS25_K211k_1_1_211_211	Q6P0T7	K211k	A0A1D5NS25_K211k_1_1_211_211	Cluster3
A0A286YAZ1_K308k_1_1_308_308	A0A286YAZ1	K308k	A0A286YAZ1_K308k_1_1_308_308	Cluster3
A0A2R8PWM9_K87k_1_1_87_87	Q6IQ92	K87k	A0A2R8PWM9_K87k_1_1_87_87	Cluster3
A0A2R8Q449_K604k_1_1_604_604	A0A2R8Q449	K604k	A0A2R8Q449_K604k_1_1_604_604	Cluster3
A0A2R8Q449_K619k_1_1_619_619	A0A2R8Q449	K619k	A0A2R8Q449_K619k_1_1_619_619	Cluster3
A0A2R8Q449_K68k_1_1_68_68	A0A2R8Q449	K68k	A0A2R8Q449_K68k_1_1_68_68	Cluster3
A0A2R8Q449_K820k_1_1_820_820	A0A2R8Q449	K820k	A0A2R8Q449_K820k_1_1_820_820	Cluster3
A0A2R8Q5S0_K220k_1_1_220_220	A0A0R4IML0	K220k	A0A2R8Q5S0_K220k_1_1_220_220	Cluster3
A0A2R8Q7M1_K510k_1_1_510_510	A0A2R8Q7M1	K510k	scarb2b	Cluster3
A0A2R8QEN7_K119k_1_1_119_119	Q0P3Z4	K119k	A0A2R8QEN7_K119k_1_1_119_119	Cluster3
A0A2R8QEN7_K155k_1_1_155_155	Q0P3Z4	K155k	A0A2R8QEN7_K155k_1_1_155_155	Cluster3
A0A2R8QHZ3_K1843k_1_1_1843_1843	A0A2R8QHZ3	K1843k	LOC100329748	Cluster3
A0A2R8QIN6_K77k_1_1_77_77	Q7T3F3	K77k	A0A2R8QIN6_K77k_1_1_77_77	Cluster3
A0A2R8QMI5_K34k_1_1_34_34	F1QRX4	K34k	bin1b	Cluster3
A0A2R8QN11_K399k_1_1_399_399	A0A2R8QN11	K399k	fermt2	Cluster3
A0A2R8QN11_K402k_1_1_402_402	A0A2R8QN11	K402k	fermt2	Cluster3
A2BGX6_K1108k_1_1_1108_1108	A2BGX6	K1108k	myhc4	Cluster3
A2BGX6_K1227k_1_1_1227_1227	A2BGX6	K1227k	myhc4	Cluster3
A2BGX6_K1242k_1_1_1242_1242	A2BGX6	K1242k	myhc4	Cluster3
A2BGX6_K1249k_1_1_1249_1249	A2BGX6	K1249k	myhc4	Cluster3
A2BGX6_K1262k_1_1_1262_1262	A2BGX6	K1262k	myhc4	Cluster3
A2BGX6_K1326k_1_1_1326_1326	A2BGX6	K1326k	myhc4	Cluster3
A2BGX6_K1376k_1_1_1376_1376	A2BGX6	K1376k	myhc4	Cluster3
A2BGX6_K1412k_1_1_1412_1412	A2BGX6	K1412k	myhc4	Cluster3
A2BGX6_K1474k_1_1_1474_1474	A2BGX6	K1474k	myhc4	Cluster3
A2BGX6_K1485k_1_1_1485_1485	A2BGX6	K1485k	myhc4	Cluster3
A2BGX6_K1505k_1_1_1505_1505	A2BGX6	K1505k	myhc4	Cluster3
A2BGX6_K1571k_1_1_1571_1571	A2BGX6	K1571k	myhc4	Cluster3
A2BGX6_K1702k_1_1_1702_1702	A2BGX6	K1702k	myhc4	Cluster3
A2BGX6_K1729k_1_1_1729_1729	A2BGX6	K1729k	myhc4	Cluster3
A2BGX6_K1850k_1_1_1850_1850	A2BGX6	K1850k	myhc4	Cluster3
A2BGX6_K1897k_1_1_1897_1897	A2BGX6	K1897k	myhc4	Cluster3
A2BGX6_K1900k_1_1_1900_1900	A2BGX6	K1900k	myhc4	Cluster3
A2BGX6_K215k_1_1_215_215	A2BGX6	K215k	myhc4	Cluster3
A2BGX6_K506k_1_1_506_506	A2BGX6	K506k	myhc4	Cluster3
A2BGX6_K642k_1_1_642_642	A2BGX6	K642k	myhc4	Cluster3
A2BGX6_K944k_1_1_944_944	A2BGX6	K944k	myhc4	Cluster3
A2BGX6_K978k_1_1_978_978	A2BGX6	K978k	myhc4	Cluster3
A2BGX6_K999k_1_1_999_999	A2BGX6	K999k	myhc4	Cluster3
A2BIR4_K109k_1_1_109_109	A2BIR3	K109k	A2BIR4_K109k_1_1_109_109	Cluster3
A4FUP0_K112k_1_1_112_112	A4FUP0	K112k	sult2st3	Cluster3
A4IG09_K518k_1_1_518_518	A4IG09	K518k	ftr83	Cluster3
A5PMP0_K399k_1_1_399_399	A5PMP0	K399k	capn2b	Cluster3
A5PMV7_K33k_1_1_33_33	A5PMV7	K33k	ppp2r1ba	Cluster3
A6H8Q3_K490k_1_1_490_490	A6H8Q3	K490k	mybphb	Cluster3
A6NA21_K264k_1_1_264_264	A6NA21	K264k	cavin1b	Cluster3
A8E7N5_K450k_1_1_450_450	A8E7N5	K450k	vps45	Cluster3
A8WGA6_K191k_1_1_191_191	Q6P0T7	K191k	A8WGA6_K191k_1_1_191_191	Cluster3
A8WGA6_K252k_1_1_252_252	Q6P0T7	K252k	A8WGA6_K252k_1_1_252_252	Cluster3
A9C3T0_K53k_1_1_53_53	A9C3T0	K53k	prkar2aa	Cluster3
B0UY61_K4997k_1_1_4997_4997	B0UY61	K4997k	neb	Cluster3
B0UY61_K689k_1_1_689_689	B0UY61	K689k	neb	Cluster3
B0UY61_K91k_1_1_91_91	B0UY61	K91k	neb	Cluster3
B3DFN3_K265k_1_1_265_265	B3DFN3	K265k	lmnb2	Cluster3
B3DFN3_K482k_1_1_482_482	B3DFN3	K482k	lmnb2	Cluster3
B8JI86_K121k_1_1_121_121	B8JI86	K121k	trim63b	Cluster3
B8JIH2_K219k_1_1_219_219	B8JIH2	K219k	vcla	Cluster3
B8JIH2_K785k_1_1_785_785	B8JIH2	K785k	vcla	Cluster3
E7EXN4_K176k_1_1_176_176	E7EXN4	K176k	stx10	Cluster3
E7EYD0_K1326k_1_1_1326_1326	E7EYD0	K1326k	myom1a	Cluster3
E7EYD0_K1346k_1_1_1346_1346	E7EYD0	K1346k	myom1a	Cluster3
E7EYD0_K766k_1_1_766_766	E7EYD0	K766k	myom1a	Cluster3
E7EYD0_K899k_1_1_899_899	E7EYD0	K899k	myom1a	Cluster3
E7EYE1_K1285k_1_1_1285_1285	A0A0R4INP3	K1285k	E7EYE1_K1285k_1_1_1285_1285	Cluster3
E7EYE1_K391k_1_1_391_391	A0A0R4INP3	K391k	E7EYE1_K391k_1_1_391_391	Cluster3
E7EYE1_K426k_1_1_426_426	A0A0R4INP3	K426k	E7EYE1_K426k_1_1_426_426	Cluster3
E7EYF3_K373k_1_1_373_373	E7EYF3	K373k	uba7	Cluster3
E7EYK8_K2970k_1_1_2970_2970	E7EYK8	K2970k	E7EYK8_K2970k_1_1_2970_2970	Cluster3
E7EYW2_K107k_1_1_107_107	E7EYW2	K107k	epn2	Cluster3
E7F8J2_K74k_1_1_74_74	A0A2R8Q0U0	K74k	E7F8J2_K74k_1_1_74_74	Cluster3
E7FAD0_K1007k_1_1_1007_1007	E7FAD0	K1007k	myhz1.1	Cluster3
E7FAD0_K1026k_1_1_1026_1026	E7FAD0	K1026k	myhz1.1	Cluster3
E9QG45_K146k_1_1_146_146	A0A2R8Q9R2	K146k	E9QG45_K146k_1_1_146_146	Cluster3
E9QG97_K78k_1_1_78_78	E9QG97	K78k	tpd52l2a	Cluster3
F1Q688_K174k_1_1_174_174	F1Q688	K174k	cavin2a	Cluster3
F1Q6S1_K520k_1_1_520_520	F1Q6S1	K520k	npepl1	Cluster3
F1Q807_K85k_1_1_85_85	F1Q807	K85k	hspb9	Cluster3
F1QCP9_K287k_1_1_287_287	F1QCP9	K287k	riok3	Cluster3
F1QCR7_K406k_1_1_406_406	F1QCR7	K406k	nefma	Cluster3
F1QFV2_K141k_1_1_141_141	F1QFV2	K141k	hnrnpa1b	Cluster3
F1QGL7_K47k_1_1_47_47	F1QGL7	K47k	camk2d2	Cluster3
F1QJI4_K3031k_1_1_3031_3031	F1QJI4	K3031k	vps13a	Cluster3
F1QN42_K326k_1_1_326_326	F1QN42	K326k	si:dkey-240h12.4	Cluster3
F1QNL7_K527k_1_1_527_527	F1QNL7	K527k	F1QNL7_K527k_1_1_527_527	Cluster3
F1QNU2_K558k_1_1_558_558	F1QNU2	K558k	F1QNU2_K558k_1_1_558_558	Cluster3
F1QNU2_K610k_1_0_610_612	F1QNU2	K610k	F1QNU2_K610k_1_0_610_612	Cluster3
F1QSU0_K134k_1_1_134_134	F1QSU0	K134k	cavin4b	Cluster3
F1QSU0_K201k_1_1_201_201	F1QSU0	K201k	cavin4b	Cluster3
F1QV31_K183k_1_1_183_183	F1QV31	K183k	krt5	Cluster3
F1QVX3_K1808k_1_1_1808_1808	F1QVX3	K1808k	myhb	Cluster3
F1QZ50_K5768k_1_1_5768_5768	F1QZ50	K5768k	ahnak	Cluster3
F1QZ50_K6091k_1_1_6091_6091	F1QZ50	K6091k	ahnak	Cluster3
F1QZQ0_K20960k_1_1_20960_20960	F1QZQ0	K20960k	ttn.2	Cluster3
F1QZQ0_K21018k_1_1_21018_21018	F1QZQ0	K21018k	ttn.2	Cluster3
F1R3J9_K341k_1_1_341_341	F1R3J9	K341k	prmt1	Cluster3
F1R487_K722k_1_1_722_722	F1R487	K722k	pimr196	Cluster3
F1R4B5_K54k_1_1_54_54	F1R4B5	K54k	ube3a	Cluster3
F1R4B5_K66k_1_0_66_67	F1R4B5	K66k	ube3a	Cluster3
F1R665_K181k_1_1_181_181	F1R665	K181k	cavin2b	Cluster3
F1R6I7_K1082k_1_1_1082_1082	F1R6I7	K1082k	mybpc2b	Cluster3
F1R6N3_K282k_1_1_282_282	F1R6N3	K282k	anxa6	Cluster3
F1R7N8_K10232k_1_1_10232_10232	F1R7N8	K10232k	ttn.2	Cluster3
F1R7N8_K10633k_1_1_10633_10633	F1R7N8	K10633k	ttn.2	Cluster3
F1R7N8_K10869k_1_1_10869_10869	F1R7N8	K10869k	ttn.2	Cluster3
F1R7N8_K12656k_1_1_12656_12656	F1R7N8	K12656k	ttn.2	Cluster3
F1R7N8_K12949k_1_1_12949_12949	F1R7N8	K12949k	ttn.2	Cluster3
F1R7N8_K13749k_1_1_13749_13749	F1R7N8	K13749k	ttn.2	Cluster3
F1R7N8_K14315k_1_1_14315_14315	F1R7N8	K14315k	ttn.2	Cluster3
F1R7N8_K14735k_1_1_14735_14735	F1R7N8	K14735k	ttn.2	Cluster3
F1R7N8_K14901k_1_1_14901_14901	F1R7N8	K14901k	ttn.2	Cluster3
F1R7N8_K15118k_1_1_15118_15118	F1R7N8	K15118k	ttn.2	Cluster3
F1R7N8_K15438k_1_1_15438_15438	F1R7N8	K15438k	ttn.2	Cluster3
F1R7N8_K15690k_1_1_15690_15690	F1R7N8	K15690k	ttn.2	Cluster3
F1R7N8_K15893k_1_1_15893_15893	F1R7N8	K15893k	ttn.2	Cluster3
F1R7N8_K17853k_1_1_17853_17853	F1R7N8	K17853k	ttn.2	Cluster3
F1R7N8_K18065k_1_1_18065_18065	F1R7N8	K18065k	ttn.2	Cluster3
F1R7N8_K19447k_1_1_19447_19447	F1R7N8	K19447k	ttn.2	Cluster3
F1R7N8_K20504k_1_1_20504_20504	F1R7N8	K20504k	ttn.2	Cluster3
F1R7N8_K20795k_1_1_20795_20795	F1R7N8	K20795k	ttn.2	Cluster3
F1R7N8_K21005k_1_1_21005_21005	F1R7N8	K21005k	ttn.2	Cluster3
F1R7N8_K21558k_1_1_21558_21558	F1R7N8	K21558k	ttn.2	Cluster3
F1R7N8_K21699k_1_1_21699_21699	F1R7N8	K21699k	ttn.2	Cluster3
F1R7N8_K21957k_1_1_21957_21957	F1R7N8	K21957k	ttn.2	Cluster3
F1R7N8_K21992k_1_1_21992_21992	F1R7N8	K21992k	ttn.2	Cluster3
F1R7N8_K22223k_1_1_22223_22223	F1R7N8	K22223k	ttn.2	Cluster3
F1R7N8_K22956k_1_1_22956_22956	F1R7N8	K22956k	ttn.2	Cluster3
F1R7N8_K23387k_1_1_23387_23387	F1R7N8	K23387k	ttn.2	Cluster3
F1R7N8_K23400k_1_1_23400_23400	F1R7N8	K23400k	ttn.2	Cluster3
F1R7N8_K23658k_1_1_23658_23658	F1R7N8	K23658k	ttn.2	Cluster3
F1R7N8_K23703k_1_1_23703_23703	F1R7N8	K23703k	ttn.2	Cluster3
F1R7N8_K23784k_1_1_23784_23784	F1R7N8	K23784k	ttn.2	Cluster3
F1R7N8_K23843k_1_1_23843_23843	F1R7N8	K23843k	ttn.2	Cluster3
F1R7N8_K23975k_1_1_23975_23975	F1R7N8	K23975k	ttn.2	Cluster3
F1R7N8_K24127k_1_1_24127_24127	F1R7N8	K24127k	ttn.2	Cluster3
F1R7N8_K24165k_1_1_24165_24165	F1R7N8	K24165k	ttn.2	Cluster3
F1R7N8_K24802k_1_1_24802_24802	F1R7N8	K24802k	ttn.2	Cluster3
F1R7N8_K24893k_1_1_24893_24893	F1R7N8	K24893k	ttn.2	Cluster3
F1R7N8_K24956k_1_1_24956_24956	F1R7N8	K24956k	ttn.2	Cluster3
F1R7N8_K25288k_1_1_25288_25288	F1R7N8	K25288k	ttn.2	Cluster3
F1R7N8_K25343k_1_1_25343_25343	F1R7N8	M25335m K25343k	ttn.2	Cluster3
F1R7N8_K25438k_1_1_25438_25438	F1R7N8	K25438k	ttn.2	Cluster3
F1R7N8_K8445k_1_1_8445_8445	F1R7N8	K8445k	ttn.2	Cluster3
F1R7N8_K9431k_1_1_9431_9431	F1R7N8	K9431k	ttn.2	Cluster3
F1R7N8_K9447k_1_1_9447_9447	F1R7N8	K9447k	ttn.2	Cluster3
F1R7N8_K9841k_1_1_9841_9841	F1R7N8	K9841k	ttn.2	Cluster3
F1R833_K151k_1_1_151_151	F1R833	K151k	nrap	Cluster3
F1R833_K1717k_1_1_1717_1717	F1R833	K1717k	nrap	Cluster3
F1R8W3_K103k_1_1_103_103	F1R8W4	K103k	F1R8W3_K103k_1_1_103_103	Cluster3
F1R8W3_K303k_1_1_303_303	F1R8W4	K303k	F1R8W3_K303k_1_1_303_303	Cluster3
F1R972_K257k_1_1_257_257	F1R972	K257k	cavin4a	Cluster3
G1K2X0_K13186k_1_1_13186_13186	G1K2X0	K13186k	ttn.1	Cluster3
G1K2X0_K15741k_1_1_15741_15741	G1K2X0	K15741k	ttn.1	Cluster3
G1K2X0_K16583k_1_1_16583_16583	G1K2X0	K16583k	ttn.1	Cluster3
G1K2X0_K16758k_1_1_16758_16758	G1K2X0	K16758k	ttn.1	Cluster3
G1K2X0_K17835k_1_1_17835_17835	G1K2X0	K17835k	ttn.1	Cluster3
G1K2X0_K18642k_1_1_18642_18642	G1K2X0	K18642k	ttn.1	Cluster3
G1K2X0_K19002k_1_1_19002_19002	G1K2X0	K19002k	ttn.1	Cluster3
G1K2X0_K19940k_1_1_19940_19940	G1K2X0	K19940k	ttn.1	Cluster3
G1K2X0_K20475k_1_1_20475_20475	G1K2X0	K20475k	ttn.1	Cluster3
G1K2X0_K25255k_1_1_25255_25255	G1K2X0	K25255k	ttn.1	Cluster3
G1K2X0_K26152k_1_1_26152_26152	G1K2X0	K26152k	ttn.1	Cluster3
G1K2X0_K26966k_1_1_26966_26966	G1K2X0	K26966k	ttn.1	Cluster3
G1K2X0_K27136k_1_1_27136_27136	G1K2X0	K27136k	ttn.1	Cluster3
G1K2X0_K27512k_1_1_27512_27512	G1K2X0	K27512k	ttn.1	Cluster3
G1K2X0_K27666k_1_1_27666_27666	G1K2X0	K27666k	ttn.1	Cluster3
G1K2X0_K27682k_1_1_27682_27682	G1K2X0	K27682k	ttn.1	Cluster3
G1K2X0_K27880k_1_1_27880_27880	G1K2X0	K27880k	ttn.1	Cluster3
G1K2X0_K28156k_1_1_28156_28156	G1K2X0	K28156k	ttn.1	Cluster3
G1K2X0_K28610k_1_1_28610_28610	G1K2X0	K28610k	ttn.1	Cluster3
G1K2X0_K28628k_1_1_28628_28628	G1K2X0	K28628k	ttn.1	Cluster3
G1K2X0_K3139k_1_1_3139_3139	G1K2X0	K3139k	ttn.1	Cluster3
G8JL25_K552k_1_1_552_552	G8JL25	K552k	hdgfl2	Cluster3
I3ITP3_K82k_1_1_82_82	I3ITP3	K82k	mbpa	Cluster3
P13104_K12k_1_1_12_12	P13104	K12k	tpma	Cluster3
P13104_K205kK213k_2_2_205_213	P13104	K205k K213k	tpma	Cluster3
P13104_K217k_1_1_217_217	P13104	K217k	tpma	Cluster3
P13104_K48k_1_1_48_48	P13104	K48k	tpma	Cluster3
Q1LYB6_K50k_1_1_50_50	Q1LYB6	K50k	atp5if1b	Cluster3
Q1LYB6_K63k_1_1_63_63	Q1LYB6	K63k	atp5if1b	Cluster3
Q1LYD7_K343k_1_1_343_343	Q1LYD7	K343k	ampd3b	Cluster3
Q24JW4_K104k_1_1_104_104	Q24JW4	K104k	flj13639	Cluster3
Q29RA2_K20k_1_1_20_20	Q29RA2	K20k	Q29RA2_K20k_1_1_20_20	Cluster3
Q566W6_K83k_1_1_83_83	Q566W6	K83k	cirbpa	Cluster3
Q567N5_K71k_1_1_71_71	Q567N5	K71k	rpl6	Cluster3
Q5RIN4_K226k_1_1_226_226	Q5RIN3	K226k	Q5RIN4_K226k_1_1_226_226	Cluster3
Q5RIN4_K234k_1_1_234_234	Q5RIN3	K234k	Q5RIN4_K234k_1_1_234_234	Cluster3
Q5RIN4_K290k_1_1_290_290	Q5RIN3	K290k	Q5RIN4_K290k_1_1_290_290	Cluster3
Q5RIN4_K381k_1_1_381_381	Q5RIN3	K381k	Q5RIN4_K381k_1_1_381_381	Cluster3
Q5U3P5_K105k_1_1_105_105	Q5U3P5	K105k	clic5a	Cluster3
Q5XJ10_K111k_1_1_111_111	Q5XJ10	K111k	gapdh	Cluster3
Q642H9_K134k_1_1_134_134	Q642H9	K134k	rps4x	Cluster3
Q6DGM0_K15k_1_1_15_15	Q6DGM0	K15k	rpl35a	Cluster3
Q6DHP2_K31k_1_1_31_31	Q6DHP2	K31k	tnni2b.2	Cluster3
Q6DHS0_K165k_1_1_165_165	Q6DHS0	K165k	trim55a	Cluster3
Q6DHS1_K52k_1_1_52_52	F1RCB6	K52k	Q6DHS1_K52k_1_1_52_52	Cluster3
Q6DHS1_K52kK63k_2_2_52_63	F1RCB6	K52k K63k	Q6DHS1_K52kK63k_2_2_52_63	Cluster3
Q6DHU6_K142k_1_1_142_142	Q6DHU6	K142k	tnni2a.3	Cluster3
Q6DHU6_K62k_1_1_62_62	Q6DHU6	K62k	tnni2a.3	Cluster3
Q6DHU6_K63k_1_1_63_63	Q6DHU6	K63k	tnni2a.3	Cluster3
Q6DHU6_K81k_1_1_81_81	Q6DHU6	K81k	tnni2a.3	Cluster3
Q6DRD2_K34k_1_1_34_34	Q6DRD2	K34k	psmc6	Cluster3
Q6DRD2_K91k_1_1_91_91	Q6DRD2	K91k	psmc6	Cluster3
Q6IMW7_K88k_1_1_88_88	Q6IMW7	K88k	pvalb4	Cluster3
Q6IQC6_K74k_1_1_74_74	Q6IQC6	K74k	psmd4a	Cluster3
Q6IQH4_K35k_1_1_35_35	Q6IQH4	K35k	psmd8	Cluster3
Q6IQH4_K6k_1_1_6_6	Q6IQH4	K6k	psmd8	Cluster3
Q6IQQ0_K129k_1_1_129_129	Q6IQQ0	K129k	rpl21	Cluster3
Q6NY65_K21k_1_1_21_21	Q6NY65	K21k	rcc1	Cluster3
Q6NYJ9_K26k_1_1_26_26	Q6NYJ9	K26k	ap2b1	Cluster3
Q6NZW3_K92k_1_1_92_92	Q6NZW3	K92k	cfl2	Cluster3
Q6P043_K153k_1_1_153_153	Q6P043	K153k	aldoab	Cluster3
Q6P0G6_K85k_1_1_85_85	Q6P0G6	K85k	myl1	Cluster3
Q6P0G6_K89k_1_1_89_89	Q6P0G6	K89k	myl1	Cluster3
Q6P0W3_K213k_1_1_213_213	Q7ZVK9	K213k	tpm3	Cluster3
Q6P0W3_K5k_1_1_5_5	A0A2R8Q650	K5k	tpm3	Cluster3
Q6P3H9_K48k_1_1_48_48	Q6P3H9	K48k	slc3a2b	Cluster3
Q6PBZ1_K125k_1_1_125_125	Q6PBZ1	K125k	rpl7a	Cluster3
Q6Q7X9_K13k_1_1_13_13	Q6Q7X9	K13k	klhl31	Cluster3
Q6TH14_K256k_1_1_256_256	Q6TH14	K256k	eno3	Cluster3
Q6TH14_K426k_1_1_426_426	Q6TH14	K426k	eno3	Cluster3
Q6TLG8_K75k_1_1_75_75	Q6TLG8	K75k	rps3	Cluster3
Q6ZM50_K281k_1_1_281_281	Q6NWK1	K281k	Q6ZM50_K281k_1_1_281_281	Cluster3
Q7SXA3_K63k_1_1_63_63	Q7SXA3	K63k	rps27a	Cluster3
Q7T1K0_K46k_1_1_46_46	Q7T1K0	K46k	rpl17	Cluster3
Q7T306_K241k_1_1_241_241	Q7T306	K241k	ckmb	Cluster3
Q7T3G4_K229k_1_1_229_229	Q7T3G4	K229k	pgam2	Cluster3
Q7ZT36_K39k_1_1_39_39	Q7ZT36	K39k	pvalb3	Cluster3
Q7ZUI4_K74k_1_1_74_74	Q7ZUI4	K74k	Q7ZUI4_K74k_1_1_74_74	Cluster3
Q7ZUK1_K128k_1_1_128_128	Q7ZUK1	K128k	Q7ZUK1_K128k_1_1_128_128	Cluster3
Q7ZVK9_K48k_1_1_48_48	Q7ZVK9	K48k	tpm1	Cluster3
Q803J3_K165k_1_1_165_165	Q803J3	K165k	rab2a	Cluster3
Q803T5_K146k_1_1_146_146	Q803T5	K146k	ahcy	Cluster3
Q804W0_K84k_1_1_84_84	Q804W0	K84k	pvalb1	Cluster3
Q804W2_K4k_1_1_4_4	Q804W2	K4k	pvalb7	Cluster3
Q8AX99_K114k_1_1_114_114	Q8AX99	K114k	actn3b	Cluster3
Q8AX99_K342k_1_1_342_342	Q8AX99	K342k	actn3b	Cluster3
Q8QGW4_K408k_1_1_408_408	Q8QGW4	K408k	rapsn	Cluster3
Q9I8U7_K98k_1_1_98_98	Q9I8U7	K98k	mylz3	Cluster3
Q9I8U8_K105k_1_1_105_105	Q9I8U8	K105k	tnnc2	Cluster3
Q9I8U8_K38k_1_1_38_38	Q9I8U8	K38k	tnnc2	Cluster3
Q9I8V0_K84k_1_1_84_84	Q9I8V0	K84k	pvalb2	Cluster3
Q9I8V0_K8k_1_1_8_8	Q9I8V0	K8k	pvalb2	Cluster3
Q9I9N0_K22k_1_1_22_22	Q9I9N0	K22k	dap1b	Cluster3
Q9PUQ6_K152k_1_1_152_152	Q9PUQ6	K152k	tmod4	Cluster3
Q9PUQ6_K164k_1_1_164_164	Q9PUQ6	K164k	tmod4	Cluster3
X1WBX1_K640k_1_1_640_640	X1WBX1	K640k	prr33	Cluster3
X1WDS4_K128k_1_1_128_128	X1WDS4	K128k	ppp2r2aa	Cluster3
A0A0G2KH95_K176k_1_1_176_176	A0A0G2KH95	K176k	psmd2	Cluster4
A0A0R4IHV6_K146k_1_1_146_146	A0A0R4IHV6	K146k	gps1	Cluster4
A0A0R4IKF0_K224k_1_1_224_224	A0A0R4IKF0	K224k	apoa1b	Cluster4
A0A0R4IUF6_K176k_1_1_176_176	A0A0R4IUF6	K176k	A0A0R4IUF6_K176k_1_1_176_176	Cluster4
A0A2R8QHZ3_K1310k_1_1_1310_1310	A0A2R8QHZ3	K1310k	LOC100329748	Cluster4
A0A2R8RK22_K626k_1_1_626_626	A0A2R8RK22	K626k	atp2a1l	Cluster4
A2BGX6_K1264k_1_1_1264_1264	A2BGX6	K1264k	myhc4	Cluster4
A2BGX6_K12k_1_1_12_12	A2BGX6	K12k	myhc4	Cluster4
A2BGX6_K1840k_1_1_1840_1840	A2BGX6	K1840k	myhc4	Cluster4
A6H8Q3_K504k_1_1_504_504	A6H8Q3	K504k	mybphb	Cluster4
A8WGA6_K216k_1_1_216_216	Q6P0T7	K216k	A8WGA6_K216k_1_1_216_216	Cluster4
A8WGA6_K257k_1_1_257_257	Q6P0T7	K257k	A8WGA6_K257k_1_1_257_257	Cluster4
A8WGA6_K272k_1_1_272_272	Q6P0T7	K272k	A8WGA6_K272k_1_1_272_272	Cluster4
A9JRT4_K133k_1_1_133_133	Q7ZUK1	K133k	ube2d3	Cluster4
E7EYE1_K28k_1_1_28_28	A0A0R4INP3	K28k	E7EYE1_K28k_1_1_28_28	Cluster4
E7F125_K7k_1_1_7_7	E7F125	K7k	ifi44a1	Cluster4
E7F1L7_K2582k_1_1_2582_2582	E7F1L7	K2582k	flnca	Cluster4
F1QL44_K1580k_1_1_1580_1580	F1QL44	K1580k	flncb	Cluster4
F1QNU2_K115k_1_1_115_115	F1QNU2	K115k	F1QNU2_K115k_1_1_115_115	Cluster4
F1QNU2_K197k_1_1_197_197	F1QNU2	K197k	F1QNU2_K197k_1_1_197_197	Cluster4
F1QNU2_K431k_1_1_431_431	F1QNU2	K431k	F1QNU2_K431k_1_1_431_431	Cluster4
F1QNU2_K437k_1_1_437_437	F1QNU2	K437k	F1QNU2_K437k_1_1_437_437	Cluster4
F1QNU2_K469k_1_1_469_469	F1QNU2	K469k	F1QNU2_K469k_1_1_469_469	Cluster4
F1QNU2_K494k_1_1_494_494	F1QNU2	K494k	F1QNU2_K494k_1_1_494_494	Cluster4
F1QNU2_K539k_1_1_539_539	F1QNU2	K539k	F1QNU2_K539k_1_1_539_539	Cluster4
F1QNU2_K542k_1_1_542_542	F1QNU2	K542k	F1QNU2_K542k_1_1_542_542	Cluster4
F1QNU2_K639k_1_1_639_639	F1QNU2	K639k	F1QNU2_K639k_1_1_639_639	Cluster4
F1QNU2_K7k_1_1_7_7	F1QNU2	K7k	F1QNU2_K7k_1_1_7_7	Cluster4
F1QUV7_K50k_1_1_50_50	F1QUV7	K50k	gars1	Cluster4
F1QVX3_K353k_1_1_353_353	F1QVX3	K353k	myhb	Cluster4
F1R4B5_K7k_1_1_7_7	F1R4B5	K7k	ube3a	Cluster4
F1R6C7_K1262k_1_1_1262_1262	F1R6C7	K1262k	myha	Cluster4
F1R7N8_K13921k_1_1_13921_13921	F1R7N8	K13921k	ttn.2	Cluster4
F1R7N8_K1424k_1_1_1424_1424	F1R7N8	K1424k	ttn.2	Cluster4
F1R7N8_K15714k_1_1_15714_15714	F1R7N8	K15714k	ttn.2	Cluster4
F1R7N8_K17283k_1_1_17283_17283	F1R7N8	K17283k	ttn.2	Cluster4
F1R7N8_K17965k_1_1_17965_17965	F1R7N8	K17965k	ttn.2	Cluster4
F1R7N8_K19392k_1_1_19392_19392	F1R7N8	K19392k	ttn.2	Cluster4
F1R7N8_K20744k_1_1_20744_20744	F1R7N8	K20744k	ttn.2	Cluster4
F1R7N8_K21398k_1_1_21398_21398	F1R7N8	K21398k	ttn.2	Cluster4
F1R7N8_K9974k_1_1_9974_9974	F1R7N8	K9974k	ttn.2	Cluster4
F1R833_K1633k_1_0_1633_1634	F1R833	K1633k	nrap	Cluster4
F1R833_K1687k_1_1_1687_1687	F1R833	K1687k	nrap	Cluster4
F1R8W3_K452k_1_1_452_452	F1QK59	K452k	F1R8W3_K452k_1_1_452_452	Cluster4
G1K2X0_K24830k_1_1_24830_24830	G1K2X0	K24830k	ttn.1	Cluster4
G1K2X0_K26417k_1_1_26417_26417	G1K2X0	K26417k	ttn.1	Cluster4
G1K2X0_K3150k_1_1_3150_3150	G1K2X0	K3150k	ttn.1	Cluster4
P13104_K205k_1_1_205_205	P13104	K205k	tpma	Cluster4
P13104_K213k_1_1_213_213	P13104	K213k	tpma	Cluster4
P13104_K37k_1_1_37_37	P13104	K37k	tpma	Cluster4
P13104_K51k_1_1_51_51	P13104	K51k	tpma	Cluster4
Q66HV8_K149k_1_1_149_149	Q66HV8	K149k	pfkma	Cluster4
Q6DHP2_K84k_1_1_84_84	Q6DHP2	K84k	tnni2b.2	Cluster4
Q6DHP2_K95k_1_1_95_95	Q6DHP2	K95k	tnni2b.2	Cluster4
Q6DHU6_K102k_1_1_102_102	Q6DHU6	K102k	tnni2a.3	Cluster4
Q6DHU6_K104k_1_0_104_105	Q6DHU6	K104k	tnni2a.3	Cluster4
Q6DHU6_K28k_1_1_28_28	Q6DHU6	K28k	tnni2a.3	Cluster4
Q6DHU6_K95k_1_1_95_95	Q6DHU6	K95k	tnni2a.3	Cluster4
Q6TH14_K197k_1_1_197_197	Q6TH14	K197k	eno3	Cluster4
Q6XG62_K23k_1_1_23_23	Q6XG62	K23k	icn	Cluster4
Q7T3G4_K62k_1_1_62_62	Q7T3G4	K62k	pgam2	Cluster4
Q802V0_K277k_1_1_277_277	Q802V0	K277k	ldb3b	Cluster4
Q8AX99_K614k_1_1_614_614	Q8AX99	K614k	actn3b	Cluster4
Q9PWC2_K33k_1_1_33_33	A0A2R8Q378	K33k	Q9PWC2_K33k_1_1_33_33	Cluster4
X1WC76_K39k_1_1_39_39	Q6PI20	K39k	si:dkey-108k21.24	Cluster4
