# Supplementary material for: Dynamic regulation of inter-organelle communication by ubiquitylation controls skeletal muscle development and disease onset
Source: eLife. 2023 Jul 11;12:e81966. doi: 10.7554/eLife.81966 (PMC10356137; doi:10.7554/eLife.81966)
Supplement: Supplementary file 6. [file elife-81966-supp6.xlsx]

## Sheet: Table S6
id	gene	tr4M_KO - tr4M_WT.logFC	tr1M_KO - tr1M_WT.logFC
F1QBR1	tnnt2d	-1.26221	0.850221
F1QJD8	F1QJD8	0.335299	-0.291683
F1QMR6	nckipsd	-1.87384	0.918037
E7FGT8	dnah10	-0.764835	0.947754
A0A2R8Q327	A0A2R8Q327	-0.811728	0.396738
X1WET4	X1WET4	-1.3458	0.963424
A0A0R4IF18	A0A0R4IF18	0.402832	-0.349446
A0A0G2LAH6	A0A0G2LAH6	-0.705032	0.632689
