# Supplementary material for: Dynamic regulation of inter-organelle communication by ubiquitylation controls skeletal muscle development and disease onset
Source: eLife. 2023 Jul 11;12:e81966. doi: 10.7554/eLife.81966 (PMC10356137; doi:10.7554/eLife.81966)
Supplement: Supplementary file 7. [file elife-81966-supp7.xlsx]

## Sheet: Table S7
id	gene	tr4M_KO - tr4M_WT.logFC	tr1M_KO - tr1M_WT.logFC
B0UY61	neb	-2.30405	-2.32763
A2BGX6	myhc4	-0.961182	-0.628766
F1R6C7	myha	-1.95517	-0.91302
B8JLS3	myh6	-1.03031	-0.773209
E7F9L8	myo1d	-0.99539	-1.02373
F1R445	sptan1	0.379093	0.521228
E7F1L7	flnca	1.10304	1.9354
A0A0R4IZA6	hspg2	0.442973	0.554855
E7EYD0	myom1a	-0.943529	-0.525644
A0A0R4IUZ8	myom1b	-1.07193	-0.573669
D1GJ56	actn3a	-1.78432	-0.906961
A0A2R8QBL5	actn2b	0.719427	0.758248
A0A140LGX4	obscnb	0.644654	0.788516
Q5U3A4	atp2a1	1.62298	1.31775
Q503C7	pygma	1.07142	1.16089
E7EXT3	pygmb	0.781672	0.583553
F1REL9	lamb1b	0.472597	0.316744
Q1LVF0	lamc1	0.682096	0.632982
A0A0R4IV67	agla	0.760606	0.369486
X1WFS0	obscnb	0.690703	0.928584
E7FDY6	ehbp1l1b	0.388394	0.722741
P13104	tpma	-1.15255	-1.26282
F1QYU0	lama4	0.465631	0.535865
F1R8W4	desma	1.87139	2.47574
F1QCR7	nefma	0.794134	0.73463
B0S553	nefmb	0.756513	0.854273
Q7SZP4	Q7SZP4	0.717619	0.883813
B0R1B8	neflb	0.936316	0.775145
F1Q8F1	inab	0.565836	0.614498
A0A0R4IHV1	pkmb	1.04584	1.65088
F8W4M7	aco2	0.626634	0.9196
F1Q545	mybpc1	1.02556	0.948494
A5WWB7	A5WWB7	1.06122	0.673605
Q58EB2	igfn1.1	-1.00192	-0.744689
Q08BA1	atp5fa1	1.12326	1.07153
F1Q4X8	evpla	-0.948117	-0.317234
A6H8Q3	mybphb	-1.31485	-0.652356
F1R4U6	si:ch211-14a17.10	-0.868282	-2.32939
F1RDA6	ndufs1	1.02035	0.555739
Q66HV8	pfkma	1.1271	0.967789
A0A2R8QE60	xirp1	0.885105	1.38837
A8WGC6	atp5f1b	0.897191	1.24259
Q6NX09	hk1	0.500348	0.59133
R4GDQ0	tpp2	0.439836	0.563534
F1QPL7	pcca	0.571993	0.449661
Q7T334	mdh2	0.870866	1.23791
Q6P271	atp1a3a	-1.63464	-1.07093
A0A2R8PXK4	synm	0.946724	1.30953
O93409	mylpfa	-1.12308	-0.643501
A0AUR2	srl	0.956423	1.42098
A0A2R8RYX8	wu:fb80c09	0.57479	0.856081
F1RCC9	synpo2la	0.773816	1.31143
U3JAM7	synpo2lb	1.00803	1.20048
X1WE42	nid2a	0.61733	0.573728
Q9I8U7	mylz3	-1.2584	-1.14834
B8JKH7	mylz3	-1.6659	-1.23878
F1Q6V0	myl4	0.985934	0.90003
Q802W2	aldh9a1b	0.841719	0.738046
Q6NYQ7	nnt	0.636905	0.570221
Q7SX99	fh	0.714086	0.876001
F1R838	dhtkd1	0.553517	0.541136
Q7SYK7	got2a	0.705834	1.06359
Q567A1	gpd1a	0.780805	0.747259
A0A0G2L836	nid1b	0.308034	0.333158
Q6TNU6	dldh	0.971241	1.13149
Q6DHT4	aldh6a1	0.409993	0.321389
A0A2R8RXT8	ak1	0.657661	1.25198
E7F2X0	clip1a	-0.754327	-0.416983
Q6PBI0	sucla2	0.999719	1.30851
Q9PUQ6	tmod4	-0.899226	-0.479821
Q6IQ59	uqcrc2b	0.870147	0.761043
Q6P0T7	tnnt3b	-1.19857	-0.575285
E9QIW4	tnnt3b	-1.90732	-0.611567
A0A286YAZ5	hdac8	0.447746	0.348965
E9QIN8	klhl41a	1.22578	2.26314
Q7SYB8	gys1	0.656739	0.740429
A0A0G2KCK6	spata5	0.75244	0.844323
Q6AZA0	acat1	0.783211	0.724591
Q66I16	etfdh	0.782202	0.853128
A0JMN2	A0JMN2	0.746502	0.715323
Q642H6	crata	0.603294	0.434624
F1QJE0	uqcrc2a	1.01159	0.948245
F8W315	F8W315	0.662092	0.775261
Q9I8U8	tnnc2	-1.43098	-0.97786
A0A0R4INV7	A0A0R4INV7	-1.12195	-0.506894
A0A0R4IQT3	A0A0R4IQT3	0.758819	1.17525
F1QRX4	bin1b	0.897282	1.71197
Q6DHU6	tnni2a.3	-1.46611	-1.19932
A0A2R8RX09	A0A2R8RX09	-1.29611	-1.80081
F8W3J9	tnni2a.2	0.631818	0.515572
A3QJU3	coq8b	0.865743	1.04824
A0A2R8QHT3	ubr4	0.854594	0.970955
Q6AZA2	ndufv1	0.964505	0.493987
F1QUE3	uqcrc1	0.925431	0.903039
E7F354	ywhag2	1.12466	1.86788
A5PN55	me2	0.590251	0.714755
A0A0R4IRM1	kif5ba	-0.82121	-0.831672
F1QDG9	smyd1a	-1.31615	-0.739675
A0A2R8QGK7	mccc1	0.529979	0.563331
F1QE62	hibadhb	0.528746	0.541112
F1QFQ7	acadsb	0.482632	0.748946
F1RDV2	ndufa10	1.24004	0.536736
A0A0R4IUB7	metap2b	0.82683	0.523358
Q6GQL7	fhl1a	0.957148	0.659654
Q5RH26	atp5f1c	1.47867	1.3057
Q6PC77	atp5pd	0.940703	1.18334
A0A0R4INZ8	dbt	0.489095	0.772356
A0A0R4IXA9	cap2	0.595016	1.05969
A0A0R4IPW4	A0A0R4IPW4	-0.587541	-0.757031
X1WFH2	si:ch211-165b10.3	0.928342	0.763234
Q6DI22	hadh	0.854818	0.5531
Q8AWD0	vdac2	0.854376	0.902206
A0A0R4IJ61	oxct1a	0.757982	0.62383
F1R972	cavin4a	0.861463	1.20515
A7MCR1	uqcrfs1	0.917837	0.98134
Q8AW60	ivd	0.566122	0.585856
Q6DRD1	atp5po	0.77795	1.00244
B8JIS1	atp5pb	0.923359	0.925174
F1R4C8	ndufs3	1.20952	0.62308
F1QI59	ppp1cb	0.416526	0.683872
A0A0R4IKE0	casq1a	0.59047	1.0369
Z4YJ58	pter	-0.491573	-0.331918
F1Q4N4	ndufs2	0.818334	0.402475
Q7ZZ04	echs1	0.989878	1.04679
F1QF15	actr2a	-1.44558	-1.59088
Q9PU58	nipsnap2	0.894828	0.678048
Q804W2	pvalb7	2.11047	1.87298
F1QXJ4	stxbp3	0.555426	0.560749
F1QZA5	psmd6	0.375686	0.416844
Q9DDE3	ache	0.585716	0.470648
B0R197	vdac3	1.16639	1.51793
A0A0R4IYL8	tpra	-0.848914	-0.777394
F1QCN0	gatd3a	0.791022	0.680674
U3JB13	ablim1b	0.652147	0.800533
E9QFU8	bcat2	0.680201	0.825065
Q7ZWA3	rbmx	0.366894	0.314341
A0A0R4ILV8	col18a1b	0.674908	0.855164
Q6NWC1	vdac1	0.69957	0.735734
F1QFQ6	dlst	0.771875	0.814354
Q6DHL8	tnni1d	1.15232	1.39357
I3ITP3	mbpa	0.665484	1.05665
A0A0R4IL00	A0A0R4IL00	-0.352133	-0.443973
E7FC79	si:cabz01113374.3	0.466579	0.468113
Q5RH04	chchd3a	0.771527	1.12303
B8A5L1	ecpas	0.466792	0.499035
Q3B7P7	uba52	1.39734	1.34038
A9JRU2	pdp1	0.344452	0.264349
Q6DHS0	trim55a	0.667784	0.981281
B8JI86	trim63b	0.693386	0.847979
Q6IQP1	gyg1b	-0.935621	-0.444775
Q1LV81	safb	0.405303	0.500401
A0A0R4IFL5	A0A0R4IFL5	0.325273	0.358268
A0A140LFP6	obscnb	0.918132	1.03592
Q4V918	psma3	0.611142	0.751035
A0A140LGS9	selenoj	0.881752	0.88667
B8JI00	suclg1	0.586901	0.590033
Q68FN5	fhl5	0.997164	0.563973
A0A0G2KH95	psmd2	0.439569	0.669911
Q6P0T0	ndufs8a	0.986742	0.600517
Q1LYB6	atp5if1b	1.32742	1.00771
F6P0J3	casq1b	0.978141	1.18975
A0A0R4IX64	si:ch73-132f6.5	0.48459	0.375006
Q6PBX8	ndufv2	0.657012	0.50037
Q6PC22	ndufa8	0.734833	0.452662
Q6DI16	casq2	0.961735	1.15314
A0A0A0MPU2	obsl1b	0.498083	0.697403
Q5CZV1	smtnl1	1.09304	1.50028
A0A0R4IUF6	A0A0R4IUF6	0.719576	0.814339
Q4QRF7	leg1b	1.64685	1.43837
F1QHE5	psmd14	0.383401	0.416194
F8W4C1	mbpb	0.749654	1.1427
F1QTF0	hmgcl	0.629564	0.714989
A8WGS1	adrm1	0.796053	1.15199
A0A2U3TVM3	nckap1	-0.830985	-0.860461
A3KPR3	histh1l1	1.4554	1.92062
F1R314	F1R314	0.676236	0.968208
A0A2R8RWG9	A0A2R8RWG9	-0.802681	-0.562898
A0A0R4I9A8	hspb11	1.4142	2.0592
Q9PUC4	psme2	1.03079	0.921845
B7ZDB5	bgnb	0.502551	0.71875
R4GE14	si:ch211-207i1.2	1.14284	1.62402
Q0P3U4	cox5b2	1.34731	0.819861
Q6DGM9	ndufa7	1.02575	0.469215
Q503D8	txndc12	0.883352	0.961951
Q568R9	sncga	-1.24191	-1.06178
Q567Y4	ndufb9	0.982533	0.577162
Q6DHI9	psmb2	0.576127	0.412158
A0A0R4IC54	hspb7	1.07056	1.16415
F1QT65	homer2	0.6469	1.18064
Q4VBU7	cox5aa	1.11376	0.661517
Q6TNV0	cox4i1	0.799781	0.532522
A8E7G6	prdx3	0.614542	0.620088
Q4VBI5	ndufa2	0.87846	0.496325
Q7T2T7	mecp2	0.56187	0.632786
F1QEU7	F1QEU7	-0.936069	-0.699231
A5WWI5	ahsg2	1.23264	0.822867
Q5PR60	Q5PR60	-0.284639	-0.346889
B7ZD40	sar1ab	1.99618	1.97337
Q6NYZ0	dnajb11	0.584607	0.674571
F1RDT4	atp6v1e1a	-0.472895	-0.270676
B0UXI4	syn1	0.555608	0.472648
A0A286Y919	myoz1b	-1.24504	-0.917886
Q6NYV3	h1-0	1.0658	1.47434
A9C3Q7	amt	-0.500747	-0.688433
A0A286YAH5	tnnt1	0.708483	0.890103
F1QGH8	sh3glb1a	0.841399	1.12684
Q502E4	ndufs4	1.25906	0.883839
F1QEJ5	uqcrq	0.824061	0.657906
F1RBK6	ndufa6	0.941692	0.728245
E7F9Y7	E7F9Y7	0.511071	0.492277
Q04475	b2m	0.569841	0.404474
F1QY27	h1-10	1.22156	0.837357
Q803L7	Q803L7	-0.439695	-0.28487
A0A2R8Q7M9	osbpl2a	0.905421	0.889606
Q6P6E5	ndufb7	0.593763	0.483712
A8DZG2	srsf6b	0.415636	0.357531
E9QI88	entpd5b	1.27871	0.696598
A5WUY4	smarca1	-1.32903	-1.64976
E7F1G6	b2ml	0.938991	0.880414
A0A0R4IBS8	snx7	-0.620826	-0.619201
E7FCN9	cspg4	-0.768361	-0.437801
Q6IVM1	rbp2b	-0.927514	-1.25221
A8E7G0	dhdh.1	-0.706639	-0.620293
M9MMA7	alpk3a	0.623573	0.502118
B0S784	B0S784	1.24913	2.03575
B8A5J2	coa6	0.772061	0.593575
F8W5Q9	sbds	-0.928102	-0.512169
A5PN22	A5PN22	0.761477	0.715007
Q566Y8	magoh	0.833568	1.09438
A0A2R8QLT7	engase	0.365235	0.357091
Q4QRD9	chordc1a	-1.36954	-1.13133
F1R313	pex19	-0.3524	-0.253061
Q2L6K8	cnpy4	0.371028	0.792789
F1QRV6	nap1l4b	0.964367	1.09528
Q6P131	txn2	0.516067	0.618352
A0A2R8QIF2	exoc3	-0.37809	-0.373706
B8JIA7	eif4eb	-0.415634	-0.416478
F1QLV5	nqo1	-0.820835	-0.467147
E7F9D4	maptb	0.732115	0.609583
E7F2K4	si:ch211-140m22.7	0.52075	0.694067
A0A2R8PWG5	prpf6	0.447123	0.435246
Q6PC63	lin7a	0.446216	0.48588
F1QY24	agxta	-0.811623	-1.74395
Q503Z0	tpd52l1	0.343658	0.407087
E9QCP2	mat2b	-0.431178	-0.417494
E7FA20	si:ch211-256m1.8	-1.11138	-0.630614
Q6NYL3	ehhadh	1.62795	1.52575
A0A0R4ILG5	ndufs7	1.01111	0.579429
F1QE13	exoc8	-0.84996	-0.662458
Q7ZVL1	osbpl2b	0.710491	0.706302
Q5TYW4	nbas	-1.09979	-0.659071
B0S7W6	spryd4	0.545496	0.640772
R4GF18	si:ch211-255p10.3	0.970283	1.69071
A0A0R4IVY5	rock1	-1.3163	-0.976425
Q6PCR6	zfr	0.772482	0.5793
F1QZX2	ca4a	-1.16128	-0.88492
F1QCE9	ndufab1b	0.780952	1.04999
A0A0G2L2Q2	uqcr10	1.02551	0.933307
Q6DC87	bola3	0.59493	0.677307
F1QRB4	sec24d	-1.52345	-1.66276
Q1LV17	irf2bp1	0.5208	0.417202
F8W3H2	atp5f1e	1.08394	1.68213
F1R8M8	rsl1d1	-2.01764	-0.989545
F1R2J2	arhgap1	-0.392855	-0.361638
B0UXV7	dnajc1	1.0903	1.25536
F1QWW6	dnajc11a	-0.836487	-0.381871
F1R0I2	apoda.1	0.472917	0.390163
E7EYJ7	erbin	-1.38967	-1.02108
A0A0R4IY13	si:ch1073-416d2.3	-0.69909	-0.919912
A0A0G2L9C0	A0A0G2L9C0	-0.554675	-0.534783
B0UXL9	B0UXL9	-0.457703	-0.429664
Q5BLE6	Q5BLE6	-0.454743	-0.40614
Q9IB47	copz2	-0.438625	-0.722917
A5WV15	acsl4b	0.625827	0.535716
F1QPB5	sept5a	-0.70046	-0.499196
F1QFV1	cttnbp2	0.447939	0.565617
F1Q8L1	dnah7	-1.08803	-1.07306
A0A0R4IJ25	smarca2	0.535325	0.558425
Q90ZL2	lancl1	-0.542544	-0.472006
A0A0R4IHP8	elmo1	1.37037	1.16049
F1R5N2	mia3	0.647303	0.462881
A0A0R4IIC4	dennd4c	-0.814438	-0.49101
A0A0R4IJ50	hdhd5	0.801543	0.725005
E7EXN4	stx10	-2.07557	-1.90186
F1R676	pofut1	-2.68178	-3.32457
A0AUR5	mindy3	0.730909	0.989399
A0A2R8QG79	dync2h1	-0.808898	-0.598466
A0A2R8PVM7	A0A2R8PVM7	1.69373	1.97229
F1RB27	appl2	-1.25033	-0.891605
A0A0J9YIG5	sec61a1l	-0.482995	-0.36485
E7F4U8	scaf4a	0.7469	0.979211
A0A0R4IFA2	A0A0R4IFA2	-1.07197	-1.51138
E7F5M0	nup214	-1.39613	-1.15518
E7FEJ0	tsc1b	0.688325	0.648731
B3DFP2	uqcc3	0.98885	0.822108
Q0P451	coa5	1.12173	1.06517
F1QPI1	si:dkeyp-77c8.5	0.629458	0.995878
F2XG13	soul4	-0.486877	-0.308539
A0A0R4IY72	zc3h13	-1.34717	-0.940157
E7F4Q5	E7F4Q5	0.927819	0.548715
E7F646	plcd4b	-0.894864	-0.775803
E7EZM1	gba	-0.753399	-0.445279
A0A0R4IIH4	fyco1a	-1.18253	-0.582067
E7FH06	pde4ba	0.995247	0.974813
F1R3Y3	get4	0.649836	0.513114
Q7ZVX9	txndc9	-0.453194	-0.582526
Q6DGL8	mrps15	1.2562	0.985203
E9QIM7	palm1a	0.620842	0.514421
E7F0V6	LOC100334178	0.429571	0.30212
R4GEJ0	usp16	-2.40695	-2.99076
A0A0R4IMM3	trappc13	0.817564	0.722397
E7F366	bptf	1.01035	0.837334
A2CF32	glipr2	-0.517228	-0.502094
A0JMP5	aoc1	-0.777475	-0.926176
A0A0R4IEI2	si:ch211-127i16.2	-0.53572	-0.279734
Q7ZW44	chtopa	2.36512	2.49765
F1QES8	fybb	-0.965832	-0.941282
Q5TZH6	msrb3	-0.594726	-0.393488
F1R372	arhgap5	0.724162	0.507776
A2CEA7	rasgrf2	-0.82401	-0.565065
Q4U0S5	paf1	-0.566924	-0.436361
R4GDT3	adgre5b.2	0.682284	0.524458
F1QKQ8	zdhhc8a	0.788281	1.07634
F1R1N7	cdc6	-1.30242	-2.58561
A0A0R4IIK5	ecm1b	-0.508984	-0.543086
F1RCR0	slu7	1.22369	1.02007
F1QAA1	pcdh7a	-2.56299	-3.14996
Q90ZZ7	aldh3b1	-1.53325	-1.36642
F1REM1	F1REM1	-1.11127	-0.598764
Q8JGR2	ddx54	0.851178	1.31133
A0A2R8Q7T0	fes	-1.41345	-0.972241
B0V199	hacd2	-0.637216	-0.972838
F1QU92	F1QU92	-0.843992	-0.814309
E7FC22	rin3	-0.967671	-1.04464
Q7ZZ03	fuom	-0.778713	-0.878256
E9QG65	tp63	1.67981	1.42174
F1QBE9	ccl25b	0.477002	0.54866
A0A2R8RHG4	thrap3a	2.35096	2.84912
Q6DGP2	syf2	0.471811	0.524243
A0A0R4INV4	A0A0R4INV4	-0.844443	-0.643031
F1QMW2	xiap	-0.463808	-0.427936
A0A1D5NS30	alpk3b	0.737864	0.764183
F1QQ42	ndufa1	0.710579	0.958435
E9QF99	slc7a1a	2.03811	1.33141
Q4V9P2	qrich1	0.997534	0.801645
B8JHR8	pibf1	-0.685994	-0.440782
F1RAH8	rbmx2	-0.487988	-0.424672
Q5W7F1	Q5W7F1	-0.967966	-0.761086
H9BFW7	cmasb	-0.854064	-0.924527
Q5TZG1	Q5TZG1	0.543468	0.563985
X1WFU1	luzp1	0.663812	0.789912
Q5RIK1	ftr97	-0.561149	-0.419017
X1WEK5	relb	-0.49727	-0.324628
Q24JV4	Q24JV4	0.964487	0.874189
T1ECU4	piwil2	0.981402	1.49478
R4GE22	scaf4b	0.982628	1.02288
E7EXD4	plk2a	-1.40415	-0.958372
A0A2R8QAT4	LOC101886910	-0.861632	-0.727253
B7ZV80	kif22	-0.772584	-0.584628
E9QI83	E9QI83	2.33493	2.29326
A0A2R8QEK3	tomm20a	-1.12578	-0.863663
A2CF23	A2CF23	-1.26119	-1.72117
E7FFB1	akap9	1.3743	1.43611
A0A0R4IY52	vps52	-0.416757	-0.64925
F1QCK5	abi3b	-0.474623	-0.423925
A0A2R8QPY5	sfxn4	-0.716871	-0.466336
F1R4M9	mctp2a	-0.82467	-0.534382
X1WER9	cox8b	2.4251	1.75667
E9QDB1	tns2a	0.625323	0.618509
A0A286Y857	daam2	-1.25631	-1.19735
E9QGF9	arhgap31	-1.4617	-1.51747
E7F0X8	stard9	-0.727765	-0.549376
A2BIN4	srek1	-0.72627	-0.515263
A0A2R8QJS2	A0A2R8QJS2	-0.972336	-0.631979
F1R019	sos2	-0.668849	-0.875072
F1QCL9	F1QCL9	0.994607	1.72661
Q5XJB9	adprhl1	-1.01632	-0.777048
F1Q589	deptor	1.30114	1.12184
A0A0R4IUT7	iqsec3a	-1.41251	-1.02275
A0A2R8QT19	osbpl1a	1.54432	1.58034
E7F2L1	aak1b	0.83344	0.94074
A0A2R8Q6I1	A0A2R8Q6I1	1.27129	1.08223
A0A0R4ISZ8	A0A0R4ISZ8	-0.871766	-0.565521
E7FFQ2	si:dkey-219c3.2	-0.843787	-0.678764
F1QXJ6	lrriq1	-0.982221	-0.804383
A0A2R8QCY5	si:rp71-68n21.9	-0.733421	-0.575658
B0S737	inpp4aa	-0.724116	-0.767658
A0A0R4IFN9	A0A0R4IFN9	-0.842072	-1.08708
B0S7D7	skia	-1.04487	-0.667963
A0A0R4IXS9	A0A0R4IXS9	0.640878	1.11353
P86839	nes	-1.47817	-0.974445
F1QC62	pho	-1.10437	-0.660443
Q5ICW6	pcdh15a	-1.97267	-1.18975
F6NI81	hoxc10a	-1.43764	-0.790237
F1QKB1	ehmt1a	1.00291	1.02907
A0A2R8QSF6	A0A2R8QSF6	0.797198	1.22772
F1R3J4	si:ch211-220f16.2	-1.61746	-1.32686
A0A2R8PZ68	A0A2R8PZ68	0.712112	0.751384
A0A286Y8A8	A0A286Y8A8	-1.55396	-1.13359
X1WF51	ncam3	-0.735084	-0.902579
F1RB13	msl1a	-1.39804	-1.3301
T1ECU9	T1ECU9	-0.829039	-0.75996
F1QPK3	F1QPK3	1.50436	1.24597
F1QV93	helz2b	-0.421449	-0.39269
E9QD84	E9QD84	1.05312	1.40668
A0A2R8Q9J8	LOC100000713	-0.825661	-0.785569
F1QKM3	F1QKM3	0.764572	1.22734
B0R0W9	tbc1d8b	-0.437337	-0.363697
A0A0G2KY42	A0A0G2KY42	0.882409	1.34333
