# Supplementary material for: Dynamic regulation of inter-organelle communication by ubiquitylation controls skeletal muscle development and disease onset
Source: eLife. 2023 Jul 11;12:e81966. doi: 10.7554/eLife.81966 (PMC10356137; doi:10.7554/eLife.81966)
Supplement: Supplementary file 8. [file elife-81966-supp8.xlsx]

## Sheet: Table S8
id.ub	id.prot	gene	variableSites.x	tr1M_KO - tr1M_WT.logFC.ub	tr1M_KO - tr1M_WT.logFC.prot
A0A0G2KH95_K176k_1_1_176_176	A0A0G2KH95	psmd2	K176k	1.85627	0.669911
A0A0R4IHV6_K146k_1_1_146_146	A0A0R4IHV6	gps1	K146k	2.0369	0.437219
A0A0R4IMS3_K69k_1_1_69_69	A0A0R4IMS3	rpl24	K69k	1.4303	0.751959
A0A0R4IUF6_K176k_1_1_176_176	A0A0R4IUF6	A0A0R4IUF6_K176k_1_1_176_176	K176k	2.14222	0.814339
A0A286YAZ1_K308k_1_1_308_308	A0A286YAZ1	A0A286YAZ1_K308k_1_1_308_308	K308k	1.26602	0.381984
A0A2R8QMI5_K34k_1_1_34_34	F1QRX4	bin1b	K34k	0.889475	1.71197
A0A2R8RK22_K626k_1_1_626_626	A0A2R8RK22	atp2a1l	K626k	1.10947	1.22744
A0A2R8RX09_K113k_1_1_113_113	A0A2R8RX09	A0A2R8RX09_K113k_1_1_113_113	K113k	-1.79613	-1.80081
A2BGX6_K1197k_1_1_1197_1197	A2BGX6	myhc4	K1197k	-1.61462	-0.628766
A2BGX6_K1786k_1_1_1786_1786	A2BGX6	myhc4	K1786k	-3.8438	-0.628766
A2BGX6_K1808k_1_1_1808_1808	A2BGX6	myhc4	K1808k	-0.932275	-0.628766
A2BGX6_K659k_1_1_659_659	A2BGX6	myhc4	K659k	-1.92777	-0.628766
A2BGX6_K805k_1_1_805_805	A2BGX6	myhc4	K805k	-1.86627	-0.628766
B0UY61_K4545k_1_1_4545_4545	B0UY61	neb	K4545k	-1.08365	-2.32763
B0UY61_K5950k_1_1_5950_5950	B0UY61	neb	K5950k	-0.946575	-2.32763
B0UY61_K5959k_1_1_5959_5959	B0UY61	neb	K5959k	-1.76375	-2.32763
B3DFN3_K482k_1_1_482_482	B3DFN3	lmnb2	K482k	1.13125	0.498176
B8JI86_K121k_1_1_121_121	B8JI86	trim63b	K121k	0.99375	0.847979
B8JLS3_K757k_1_1_757_757	B8JLS3	myh6	K757k	-0.8592	-0.773209
E7EYW2_K107k_1_1_107_107	E7EYW2	epn2	K107k	1.60937	0.658775
E7F8J2_K74k_1_1_74_74	A0A2R8Q0U0	E7F8J2_K74k_1_1_74_74	K74k	0.926625	0.953205
E9QCU8_K1041k_1_1_1041_1041	E9QCU8	myo6a	K1041k	-1.17068	-0.646437
E9QG97_K78k_1_1_78_78	E9QG97	tpd52l2a	K78k	1.6917	0.992575
F1QFV2_K141k_1_1_141_141	F1QFV2	hnrnpa1b	K141k	0.9955	0.645984
F1QGL7_K47k_1_1_47_47	F1QGL7	camk2d2	K47k	1.40802	0.697466
F1QL44_K1580k_1_1_1580_1580	F1QL44	flncb	K1580k	1.2691	0.66524
F1QSU0_K134k_1_1_134_134	F1QSU0	cavin4b	K134k	0.96295	0.929168
F1QSU0_K201k_1_1_201_201	F1QSU0	cavin4b	K201k	1.4673	0.929168
F1QY24_K299k_1_1_299_299	F1QY24	agxta	K299k	-1.71075	-1.74395
F1R665_K181k_1_1_181_181	F1R665	cavin2b	K181k	1.85737	0.473587
F1R6N3_K282k_1_1_282_282	F1R6N3	anxa6	K282k	1.36193	0.951078
F1R7N8_K10869k_1_1_10869_10869	F1R7N8	ttn.2	K10869k	1.13465	0.495247
F1R7N8_K12949k_1_1_12949_12949	F1R7N8	ttn.2	K12949k	1.49537	0.495247
F1R7N8_K13749k_1_1_13749_13749	F1R7N8	ttn.2	K13749k	1.3638	0.495247
F1R7N8_K1424k_1_1_1424_1424	F1R7N8	ttn.2	K1424k	1.48085	0.495247
F1R7N8_K14901k_1_1_14901_14901	F1R7N8	ttn.2	K14901k	1.56688	0.495247
F1R7N8_K15118k_1_1_15118_15118	F1R7N8	ttn.2	K15118k	2.03378	0.495247
F1R7N8_K15438k_1_1_15438_15438	F1R7N8	ttn.2	K15438k	0.9871	0.495247
F1R7N8_K15690k_1_1_15690_15690	F1R7N8	ttn.2	K15690k	1.78422	0.495247
F1R7N8_K15714k_1_1_15714_15714	F1R7N8	ttn.2	K15714k	2.38212	0.495247
F1R7N8_K15893k_1_1_15893_15893	F1R7N8	ttn.2	K15893k	0.767325	0.495247
F1R7N8_K17283k_1_1_17283_17283	F1R7N8	ttn.2	K17283k	1.87821	0.495247
F1R7N8_K17965k_1_1_17965_17965	F1R7N8	ttn.2	K17965k	2.50448	0.495247
F1R7N8_K19392k_1_1_19392_19392	F1R7N8	ttn.2	K19392k	2.37032	0.495247
F1R7N8_K20504k_1_1_20504_20504	F1R7N8	ttn.2	K20504k	1.38237	0.495247
F1R7N8_K20744k_1_1_20744_20744	F1R7N8	ttn.2	K20744k	1.98781	0.495247
F1R7N8_K20795k_1_1_20795_20795	F1R7N8	ttn.2	K20795k	0.8815	0.495247
F1R7N8_K21005k_1_1_21005_21005	F1R7N8	ttn.2	K21005k	0.877492	0.495247
F1R7N8_K21398k_1_1_21398_21398	F1R7N8	ttn.2	K21398k	1.46661	0.495247
F1R7N8_K21558k_1_1_21558_21558	F1R7N8	ttn.2	K21558k	1.22073	0.495247
F1R7N8_K21699k_1_1_21699_21699	F1R7N8	ttn.2	K21699k	2.29975	0.495247
F1R7N8_K23400k_1_1_23400_23400	F1R7N8	ttn.2	K23400k	0.959275	0.495247
F1R7N8_K23703k_1_1_23703_23703	F1R7N8	ttn.2	K23703k	1.37262	0.495247
F1R7N8_K23784k_1_1_23784_23784	F1R7N8	ttn.2	K23784k	1.70547	0.495247
F1R7N8_K23843k_1_1_23843_23843	F1R7N8	ttn.2	K23843k	1.09823	0.495247
F1R7N8_K24893k_1_1_24893_24893	F1R7N8	ttn.2	K24893k	1.15892	0.495247
F1R7N8_K25288k_1_1_25288_25288	F1R7N8	ttn.2	K25288k	1.26297	0.495247
F1R7N8_K25343k_1_1_25343_25343	F1R7N8	ttn.2	M25335m K25343k	2.964	0.495247
F1R7N8_K25438k_1_1_25438_25438	F1R7N8	ttn.2	K25438k	1.6265	0.495247
F1R7N8_K8445k_1_1_8445_8445	F1R7N8	ttn.2	K8445k	1.94663	0.495247
F1R7N8_K9447k_1_1_9447_9447	F1R7N8	ttn.2	K9447k	1.19875	0.495247
F1R7N8_K9841k_1_1_9841_9841	F1R7N8	ttn.2	K9841k	1.47	0.495247
F1R7N8_K9974k_1_1_9974_9974	F1R7N8	ttn.2	K9974k	1.99648	0.495247
F1R8W3_K103k_1_1_103_103	F1R8W4	F1R8W3_K103k_1_1_103_103	K103k	1.62125	2.47574
F1R8W3_K303k_1_1_303_303	F1R8W4	F1R8W3_K303k_1_1_303_303	K303k	1.722	2.47574
F1R972_K257k_1_1_257_257	F1R972	cavin4a	K257k	0.964875	1.20515
I3ITP3_K82k_1_1_82_82	I3ITP3	mbpa	K82k	1.08157	1.05665
Q66HV8_K149k_1_1_149_149	Q66HV8	pfkma	K149k	1.27893	0.967789
Q6DHS0_K165k_1_1_165_165	Q6DHS0	trim55a	K165k	1.73225	0.981281
Q6DRD2_K91k_1_1_91_91	Q6DRD2	psmc6	K91k	1.60981	0.493606
Q6IMW7_K88k_1_1_88_88	Q6IMW7	pvalb4	K88k	1.8068	0.973776
Q6IQX1_K574k_1_1_574_574	Q6IQX1	myhz2	K574k	-1.73872	-0.880209
Q6NYR0_K454k_1_1_454_454	Q6NYR0	shmt1	K454k	-0.9998	-1.22363
Q6P043_K153k_1_1_153_153	Q6P043	aldoab	K153k	2.20792	0.829625
Q6P4V5_K535k_1_1_535_535	Q6P4V5	scp2a	K535k	-1.11369	-0.705216
Q6Q7X9_K13k_1_1_13_13	Q6Q7X9	klhl31	K13k	1.04098	1.06559
Q6TH14_K256k_1_1_256_256	Q6TH14	eno3	K256k	0.965233	0.70398
Q7T306_K241k_1_1_241_241	Q7T306	ckmb	K241k	1.38755	0.627191
Q7T3G4_K229k_1_1_229_229	Q7T3G4	pgam2	K229k	0.919092	0.630048
Q7T3G4_K62k_1_1_62_62	Q7T3G4	pgam2	K62k	2.44082	0.630048
Q7ZT36_K39k_1_1_39_39	Q7ZT36	pvalb3	K39k	0.91635	1.13503
Q7ZUI4_K74k_1_1_74_74	Q7ZUI4	Q7ZUI4_K74k_1_1_74_74	K74k	1.07615	0.709253
Q804W0_K84k_1_1_84_84	Q804W0	pvalb1	K84k	2.93867	0.677289
Q804W2_K4k_1_1_4_4	Q804W2	pvalb7	K4k	1.40004	1.87298
