# Supplementary material for: Dynamic regulation of inter-organelle communication by ubiquitylation controls skeletal muscle development and disease onset
Source: eLife. 2023 Jul 11;12:e81966. doi: 10.7554/eLife.81966 (PMC10356137; doi:10.7554/eLife.81966)
Supplement: Supplementary file 9. [file elife-81966-supp9.xlsx]

## Sheet: Table S9
id.ub	id.prot	gene	variableSites.x	tr1M_KO - tr1M_WT.logFC.ub	tr1M_KO - tr1M_WT.logFC.prot
A0A0R4IHV1_K206k_1_1_206_206	A0A0R4IHV1	pkmb	K206k	-1.02523	1.65088
A0A0R4J7R2_K1986k_1_1_1986_1986	A0A0R4J7R2	myo18aa	K1986k	-1.2677	0.575199
A0A1D5NS25_K211k_1_1_211_211	Q6P0T7	A0A1D5NS25_K211k_1_1_211_211	K211k	1.11769	-0.575285
A0A2R8PWM9_K87k_1_1_87_87	Q6IQ92	A0A2R8PWM9_K87k_1_1_87_87	K87k	1.4988	-0.71624
A0A2R8Q483_K321k_1_1_321_321	A0A2R8Q483	vimr2	K321k	-1.27547	0.661629
A0A2R8QI77_K4058kK4072k_2_0_4055_4058	A0A2R8QI77	prx	K4058k K4072k	-3.21782	0.477246
A0A2R8QRW5_K45k_1_1_45_45	A0A2R8QRW5	gstt2	K45k	-1.09388	0.37347
A0A2R9YJH5_K291k_1_1_291_291	A0A2R9YJH5	ckmt2a	K291k	-1.65718	0.613029
A2BGX6_K1108k_1_1_1108_1108	A2BGX6	myhc4	K1108k	1.4032	-0.628766
A2BGX6_K1227k_1_1_1227_1227	A2BGX6	myhc4	K1227k	1.04303	-0.628766
A2BGX6_K1242k_1_1_1242_1242	A2BGX6	myhc4	K1242k	1.8333	-0.628766
A2BGX6_K1249k_1_1_1249_1249	A2BGX6	myhc4	K1249k	1.57475	-0.628766
A2BGX6_K1262k_1_1_1262_1262	A2BGX6	myhc4	K1262k	1.23175	-0.628766
A2BGX6_K1264k_1_1_1264_1264	A2BGX6	myhc4	K1264k	4.10527	-0.628766
A2BGX6_K12k_1_1_12_12	A2BGX6	myhc4	K12k	1.6211	-0.628766
A2BGX6_K1326k_1_1_1326_1326	A2BGX6	myhc4	K1326k	1.68413	-0.628766
A2BGX6_K1376k_1_1_1376_1376	A2BGX6	myhc4	K1376k	0.912675	-0.628766
A2BGX6_K1412k_1_1_1412_1412	A2BGX6	myhc4	K1412k	1.47408	-0.628766
A2BGX6_K1474k_1_1_1474_1474	A2BGX6	myhc4	K1474k	0.925475	-0.628766
A2BGX6_K1485k_1_1_1485_1485	A2BGX6	myhc4	K1485k	0.872775	-0.628766
A2BGX6_K1505k_1_1_1505_1505	A2BGX6	myhc4	K1505k	1.23467	-0.628766
A2BGX6_K1571k_1_1_1571_1571	A2BGX6	myhc4	K1571k	1.56098	-0.628766
A2BGX6_K1702k_1_1_1702_1702	A2BGX6	myhc4	K1702k	1.6088	-0.628766
A2BGX6_K1729k_1_1_1729_1729	A2BGX6	myhc4	K1729k	0.776725	-0.628766
A2BGX6_K1840k_1_1_1840_1840	A2BGX6	myhc4	K1840k	3.96582	-0.628766
A2BGX6_K1850k_1_1_1850_1850	A2BGX6	myhc4	K1850k	1.3429	-0.628766
A2BGX6_K1897k_1_1_1897_1897	A2BGX6	myhc4	K1897k	1.38055	-0.628766
A2BGX6_K1900k_1_1_1900_1900	A2BGX6	myhc4	K1900k	0.98295	-0.628766
A2BGX6_K215k_1_1_215_215	A2BGX6	myhc4	K215k	1.85022	-0.628766
A2BGX6_K506k_1_1_506_506	A2BGX6	myhc4	K506k	2.54303	-0.628766
A2BGX6_K642k_1_1_642_642	A2BGX6	myhc4	K642k	1.04345	-0.628766
A2BGX6_K944k_1_1_944_944	A2BGX6	myhc4	K944k	1.48228	-0.628766
A2BGX6_K978k_1_1_978_978	A2BGX6	myhc4	K978k	1.08268	-0.628766
A2BGX6_K999k_1_1_999_999	A2BGX6	myhc4	K999k	1.41371	-0.628766
A4IG09_K518k_1_1_518_518	A4IG09	ftr83	K518k	0.916625	-0.669093
A6H8Q3_K490k_1_1_490_490	A6H8Q3	mybphb	K490k	1.41295	-0.652356
A6H8Q3_K504k_1_1_504_504	A6H8Q3	mybphb	K504k	2.67115	-0.652356
A8WGA6_K191k_1_1_191_191	Q6P0T7	A8WGA6_K191k_1_1_191_191	K191k	1.75685	-0.575285
A8WGA6_K216k_1_1_216_216	Q6P0T7	A8WGA6_K216k_1_1_216_216	K216k	1.8544	-0.575285
A8WGA6_K252k_1_1_252_252	Q6P0T7	A8WGA6_K252k_1_1_252_252	K252k	1.85932	-0.575285
A8WGA6_K272k_1_1_272_272	Q6P0T7	A8WGA6_K272k_1_1_272_272	K272k	3.25478	-0.575285
A9JRG7_K378k_1_1_378_378	A9JRG7	A9JRG7_K378k_1_1_378_378	K378k	-1.45597	0.755348
B0S553_K237k_1_1_237_237	B0S553	nefmb	K237k	-0.794225	0.854273
B0UY61_K4997k_1_1_4997_4997	B0UY61	neb	K4997k	0.896025	-2.32763
B0UY61_K689k_1_1_689_689	B0UY61	neb	K689k	2.06295	-2.32763
B0UY61_K91k_1_1_91_91	B0UY61	neb	K91k	1.03266	-2.32763
B8JIS1_K244k_1_1_244_244	B8JIS1	atp5pb	K244k	-1.02228	0.925174
B8JLJ8_K61k_1_1_61_61	B8JLJ8	hnrpkl	K61k	-0.7481	0.355444
E7EYD0_K1326k_1_1_1326_1326	E7EYD0	myom1a	K1326k	1.25867	-0.525644
E7EYD0_K1346k_1_1_1346_1346	E7EYD0	myom1a	K1346k	1.44853	-0.525644
E7EYK8_K2970k_1_1_2970_2970	E7EYK8	E7EYK8_K2970k_1_1_2970_2970	K2970k	1.77493	-4.4113
E7F0K3_K240k_1_1_240_240	E7F0K3	cavin1a	K240k	-2.14188	1.14456
E7F354_K142k_1_1_142_142	E7F354	ywhag2	K142k	-0.8319	1.86788
E7FAD0_K1026k_1_1_1026_1026	E7FAD0	myhz1.1	K1026k	0.952183	-0.908194
F1QFV2_K105k_1_1_105_105	F1QFV2	hnrnpa1b	K105k	-0.938725	0.645984
F1QNL7_K527k_1_1_527_527	F1QNL7	F1QNL7_K527k_1_1_527_527	K527k	0.9205	-0.826672
F1R487_K722k_1_1_722_722	F1R487	pimr196	K722k	1.20415	-2.72389
F1R6C7_K1262k_1_1_1262_1262	F1R6C7	myha	K1262k	1.8392	-0.91302
F1R7N8_K10004k_1_1_10004_10004	F1R7N8	ttn.2	K10004k	-0.945775	0.495247
F1R7N8_K1537k_1_1_1537_1537	F1R7N8	ttn.2	K1537k	-0.85115	0.495247
F1R7N8_K1768k_1_1_1768_1768	F1R7N8	ttn.2	K1768k	-1.50067	0.495247
F1R7N8_K5543k_1_1_5543_5543	F1R7N8	ttn.2	K5543k	-0.982	0.495247
F1R7N8_K5809k_1_1_5809_5809	F1R7N8	ttn.2	K5809k	-0.999075	0.495247
F1R7N8_K6607k_1_1_6607_6607	F1R7N8	ttn.2	K6607k	-0.9419	0.495247
F1R7N8_K6636k_1_1_6636_6636	F1R7N8	ttn.2	K6636k	-1.02632	0.495247
F1R7N8_K7412k_1_1_7412_7412	F1R7N8	ttn.2	K7412k	-1.38322	0.495247
F1R7N8_K8981k_1_1_8981_8981	F1R7N8	ttn.2	K8981k	-1.5312	0.495247
F1R7N8_K9117k_1_1_9117_9117	F1R7N8	ttn.2	K9117k	-1.20168	0.495247
F1R833_K151k_1_1_151_151	F1R833	nrap	K151k	1.6723	-0.386513
F1R833_K1633k_1_0_1633_1634	F1R833	nrap	K1633k	1.44981	-0.386513
F1R833_K1687k_1_1_1687_1687	F1R833	nrap	K1687k	2.21602	-0.386513
F1R833_K1717k_1_1_1717_1717	F1R833	nrap	K1717k	1.08345	-0.386513
P13104_K12k_1_1_12_12	P13104	tpma	K12k	1.11037	-1.26282
P13104_K205k_1_1_205_205	P13104	tpma	K205k	2.08505	-1.26282
P13104_K205kK213k_2_2_205_213	P13104	tpma	K205k K213k	2.25362	-1.26282
P13104_K213k_1_1_213_213	P13104	tpma	K213k	3.00265	-1.26282
P13104_K37k_1_1_37_37	P13104	tpma	K37k	2.21825	-1.26282
P13104_K48k_1_1_48_48	P13104	tpma	K48k	1.49305	-1.26282
P13104_K51k_1_1_51_51	P13104	tpma	K51k	3.20158	-1.26282
Q5TZG5_K438k_1_1_438_438	Q5TZG5	ezrb	K438k	-0.854933	0.62675
Q6AZC1_K402k_1_1_402_402	Q6AZC1	psmc5	K402k	-0.8305	0.511448
Q6DHU6_K102k_1_1_102_102	Q6DHU6	tnni2a.3	K102k	2.12491	-1.19932
Q6DHU6_K104k_1_0_104_105	Q6DHU6	tnni2a.3	K104k	1.22127	-1.19932
Q6DHU6_K142k_1_1_142_142	Q6DHU6	tnni2a.3	K142k	1.15932	-1.19932
Q6DHU6_K28k_1_1_28_28	Q6DHU6	tnni2a.3	K28k	2.6718	-1.19932
Q6DHU6_K62k_1_1_62_62	Q6DHU6	tnni2a.3	K62k	2.16357	-1.19932
Q6DHU6_K63k_1_1_63_63	Q6DHU6	tnni2a.3	K63k	1.1414	-1.19932
Q6DHU6_K81k_1_1_81_81	Q6DHU6	tnni2a.3	K81k	1.51792	-1.19932
Q6DHU6_K95k_1_1_95_95	Q6DHU6	tnni2a.3	K95k	4.14148	-1.19932
Q6P0W3_K213k_1_1_213_213	Q7ZVK9	tpm3	K213k	2.66237	-1.1174
Q6P102_K9k_1_1_9_9	Q6P102	ywhabl	K9k	-1.14742	0.588002
Q6TNT9_K438k_1_0_437_438	Q6TNT9	gdi2	K438k	-0.82195	0.336979
Q7T1J9_K139k_1_1_139_139	Q7T1J9	rps10	K139k	-1.86982	0.808373
Q7T334_K77k_1_1_77_77	Q7T334	mdh2	K77k	-0.882325	1.23791
Q7ZVK9_K48k_1_1_48_48	Q7ZVK9	tpm1	K48k	1.0368	-1.1174
Q803Q7_K330k_1_1_330_330	Q803Q7	aldoaa	K330k	-0.87105	0.969407
Q8JH70_K330k_1_1_330_330	Q8JH70	aldocb	K330k	-0.910775	0.706889
Q90XR8_K212k_1_1_212_212	Q90XR8	cldnb	K212k	-1.2693	2.09804
Q9I8U7_K98k_1_1_98_98	Q9I8U7	mylz3	K98k	1.22303	-1.14834
Q9I8U8_K105k_1_1_105_105	Q9I8U8	tnnc2	K105k	2.17955	-0.97786
Q9I8U8_K38k_1_1_38_38	Q9I8U8	tnnc2	K38k	1.62607	-0.97786
Q9PUQ6_K152k_1_1_152_152	Q9PUQ6	tmod4	K152k	2.02272	-0.479821
Q9PUQ6_K164k_1_1_164_164	Q9PUQ6	tmod4	K164k	1.41997	-0.479821
