# Supplementary figures and images for: Dynamic regulation of inter-organelle communication by ubiquitylation controls skeletal muscle development and disease onset
Source: eLife journal article supplement (doi:10.7554/elife.81966), 2023-07-07

Figure 2-figure supplement 1

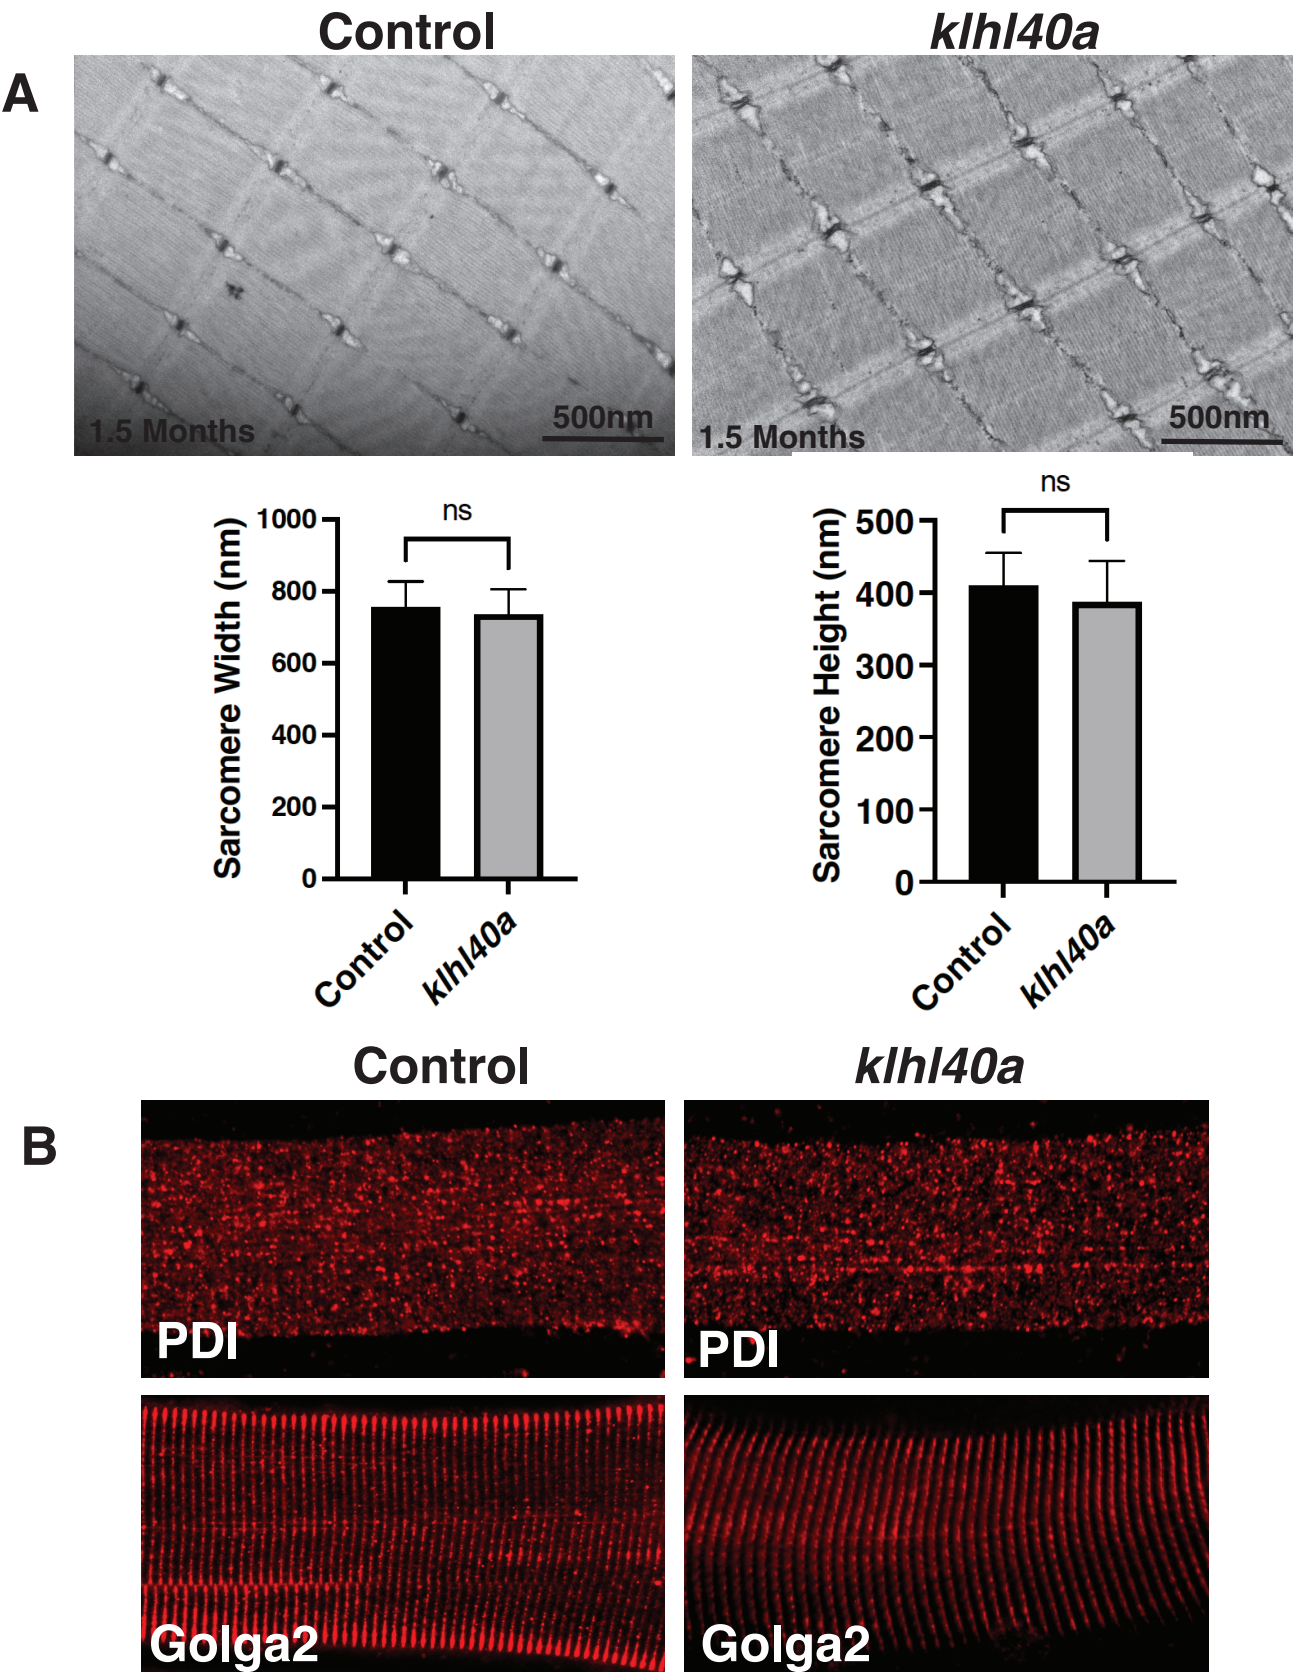

Supplement: supp [file elife-81966-supp-v1.zip]

Figure 9-figure supplement 1

A

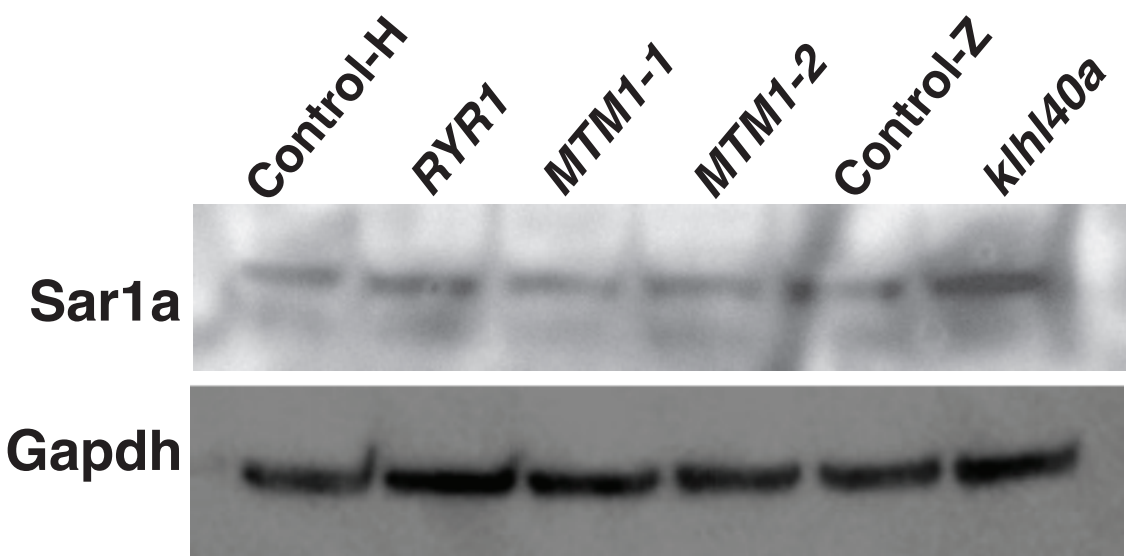

B

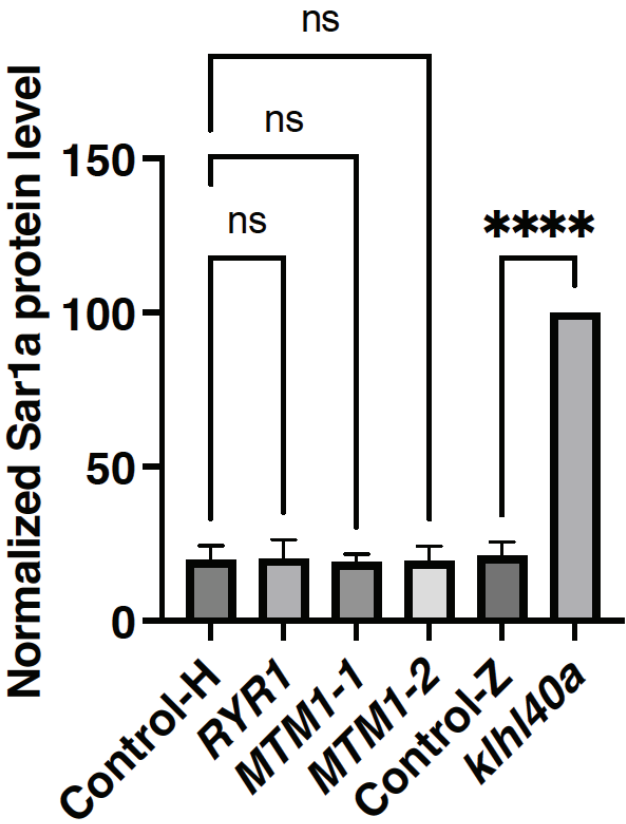

Supplement: supp [file elife-81966-supp-v1.zip]

Figure 3-figure supplement 2

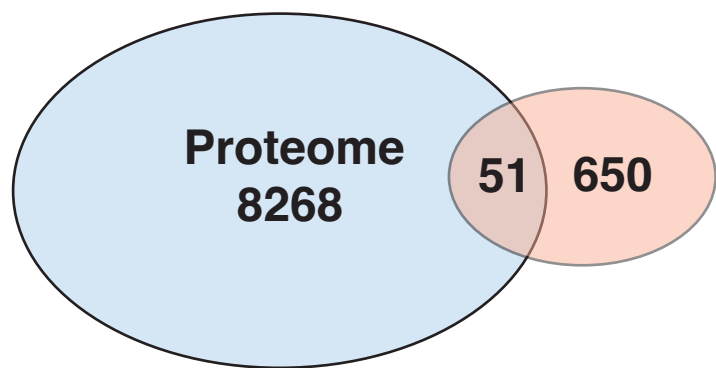

Supplement: supp [file elife-81966-supp-v1.zip]

Figure S9-figure supplement 1-Source data 3

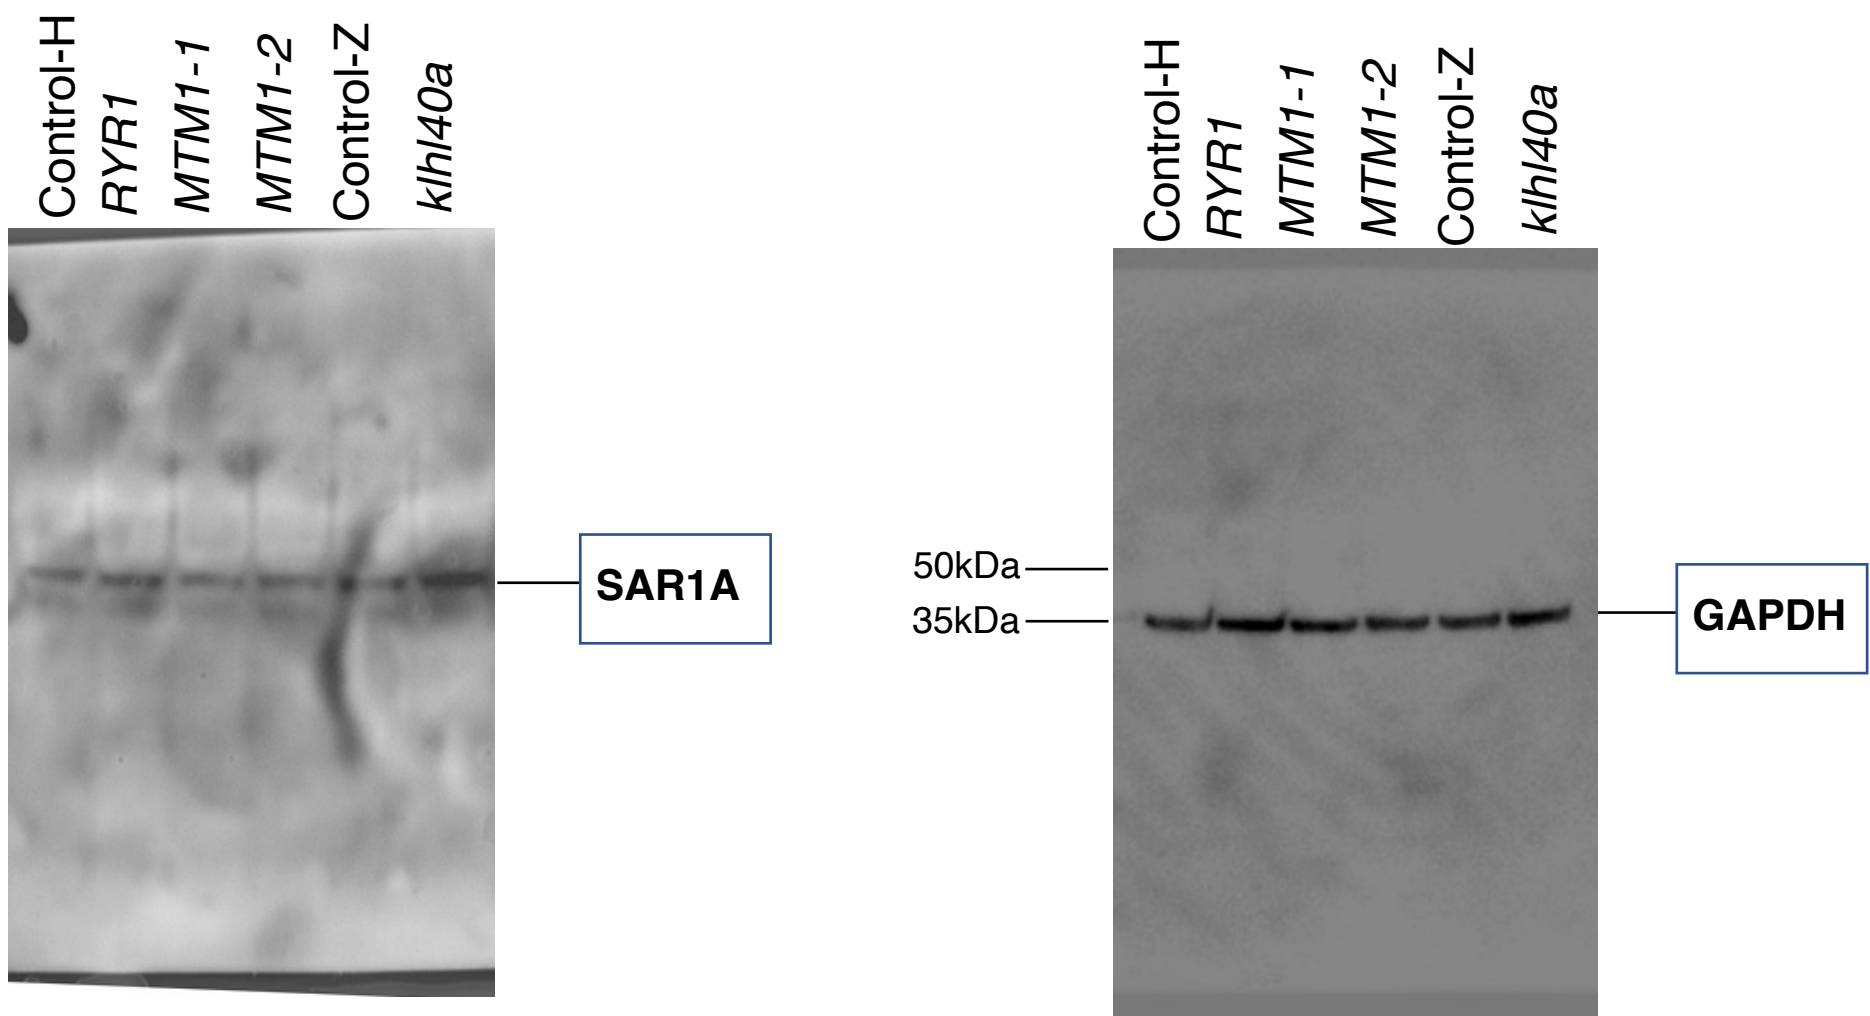

WB: Anti-Sar1: ab125871, Abcam

WB: Anti-GAPDH: ab8245, Abcam

Supplement: supp [file elife-81966-supp-v1.zip]

Figure 3-supplemental figure 1

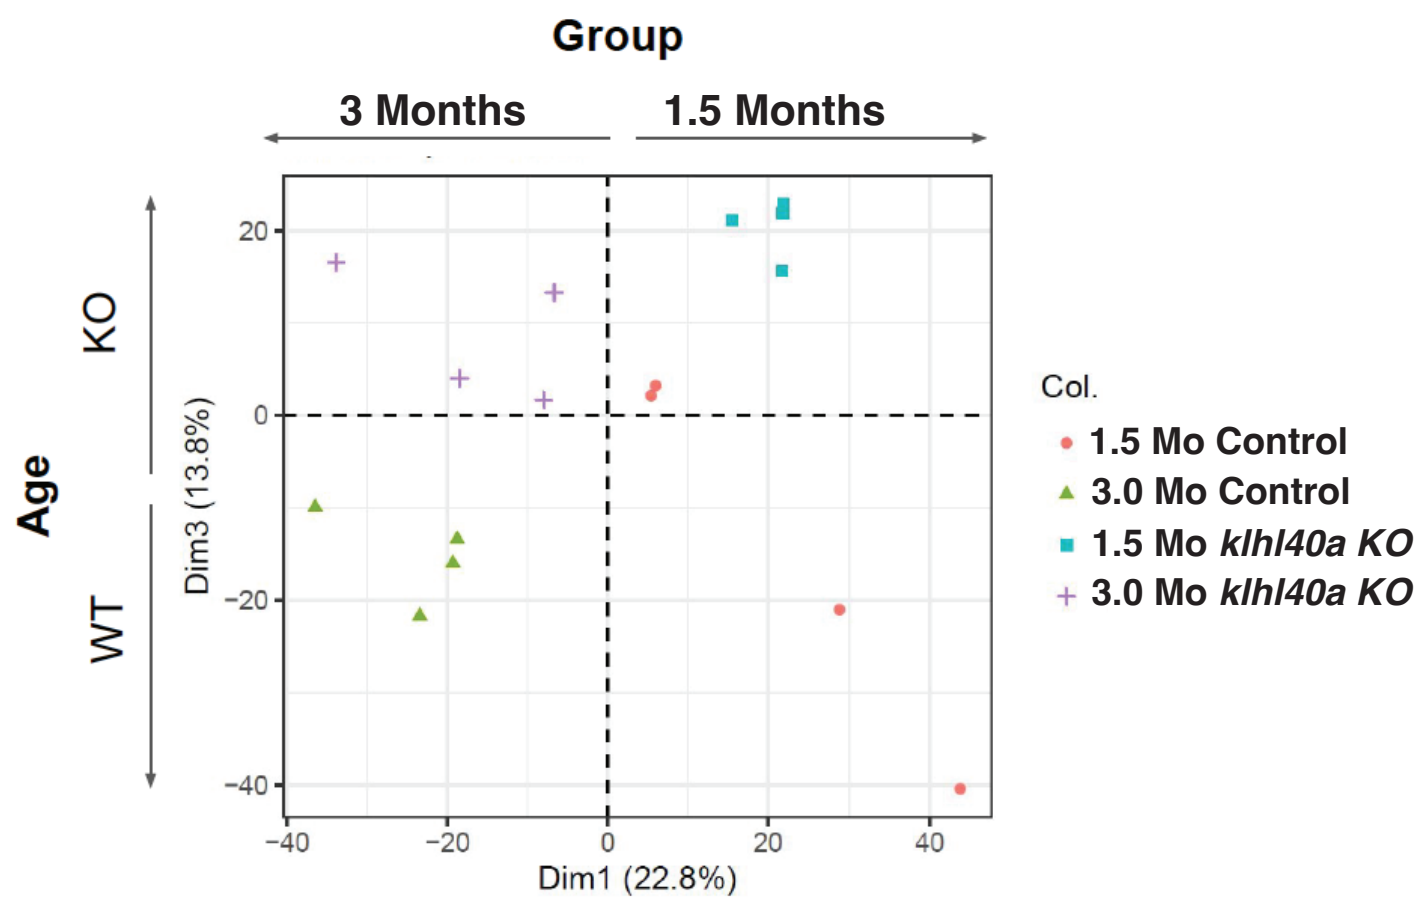

Supplement: supp [file elife-81966-supp-v1.zip]

Figure 6-figure supplement 1

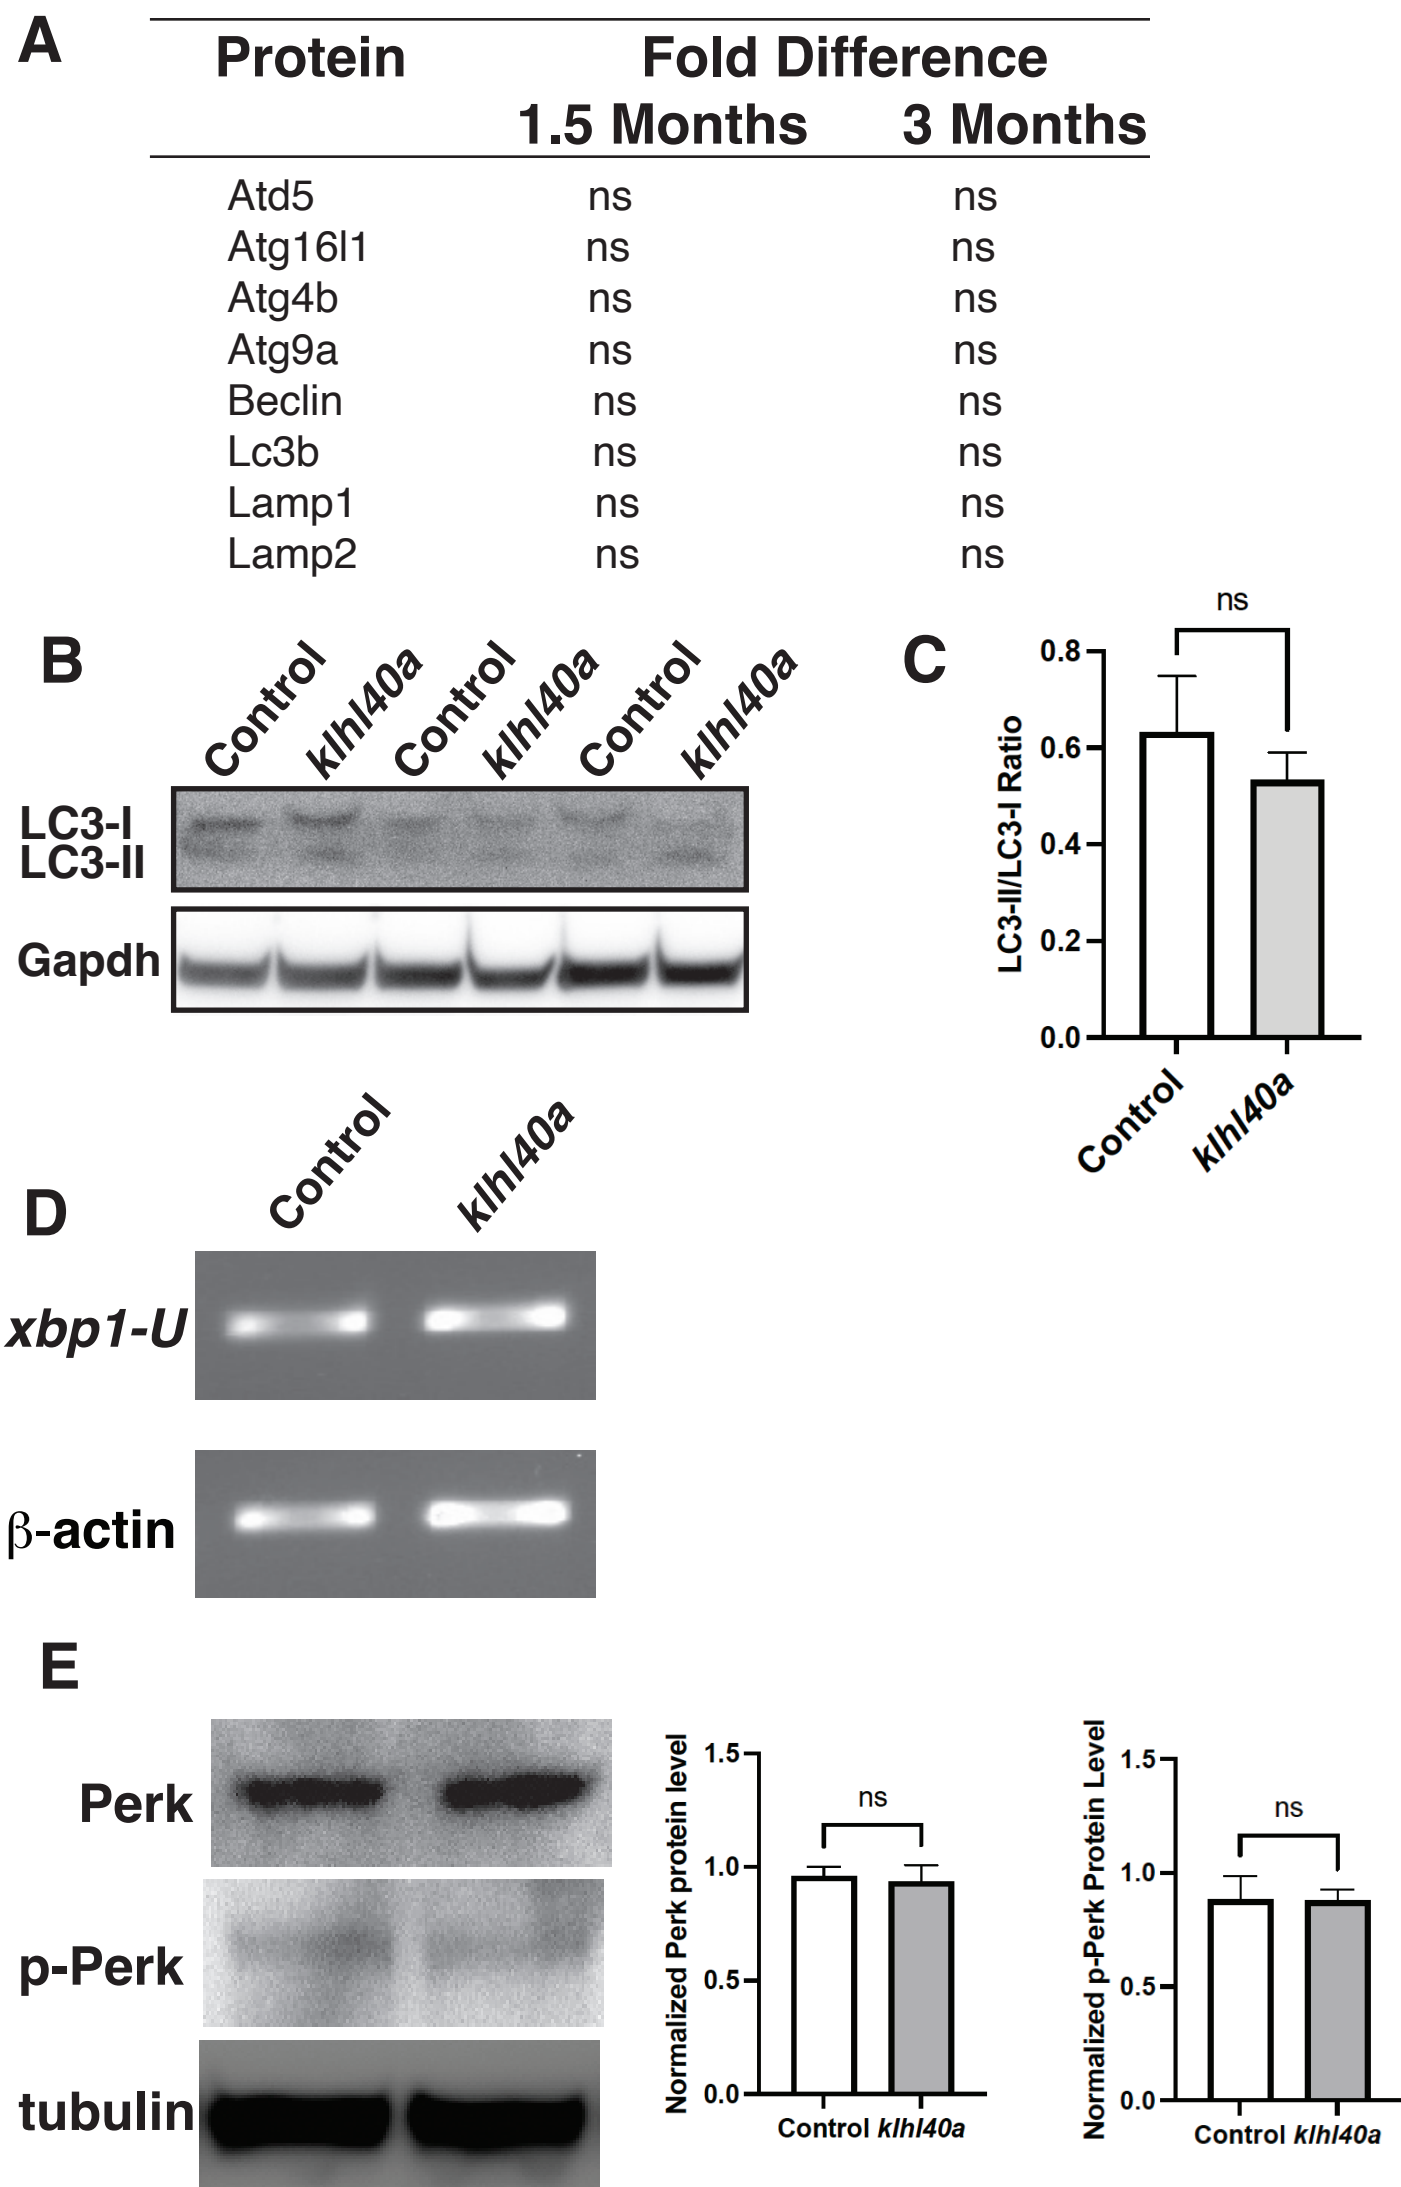

Supplement: supp [file elife-81966-supp-v1.zip]

Figure 7-figure supplement-1

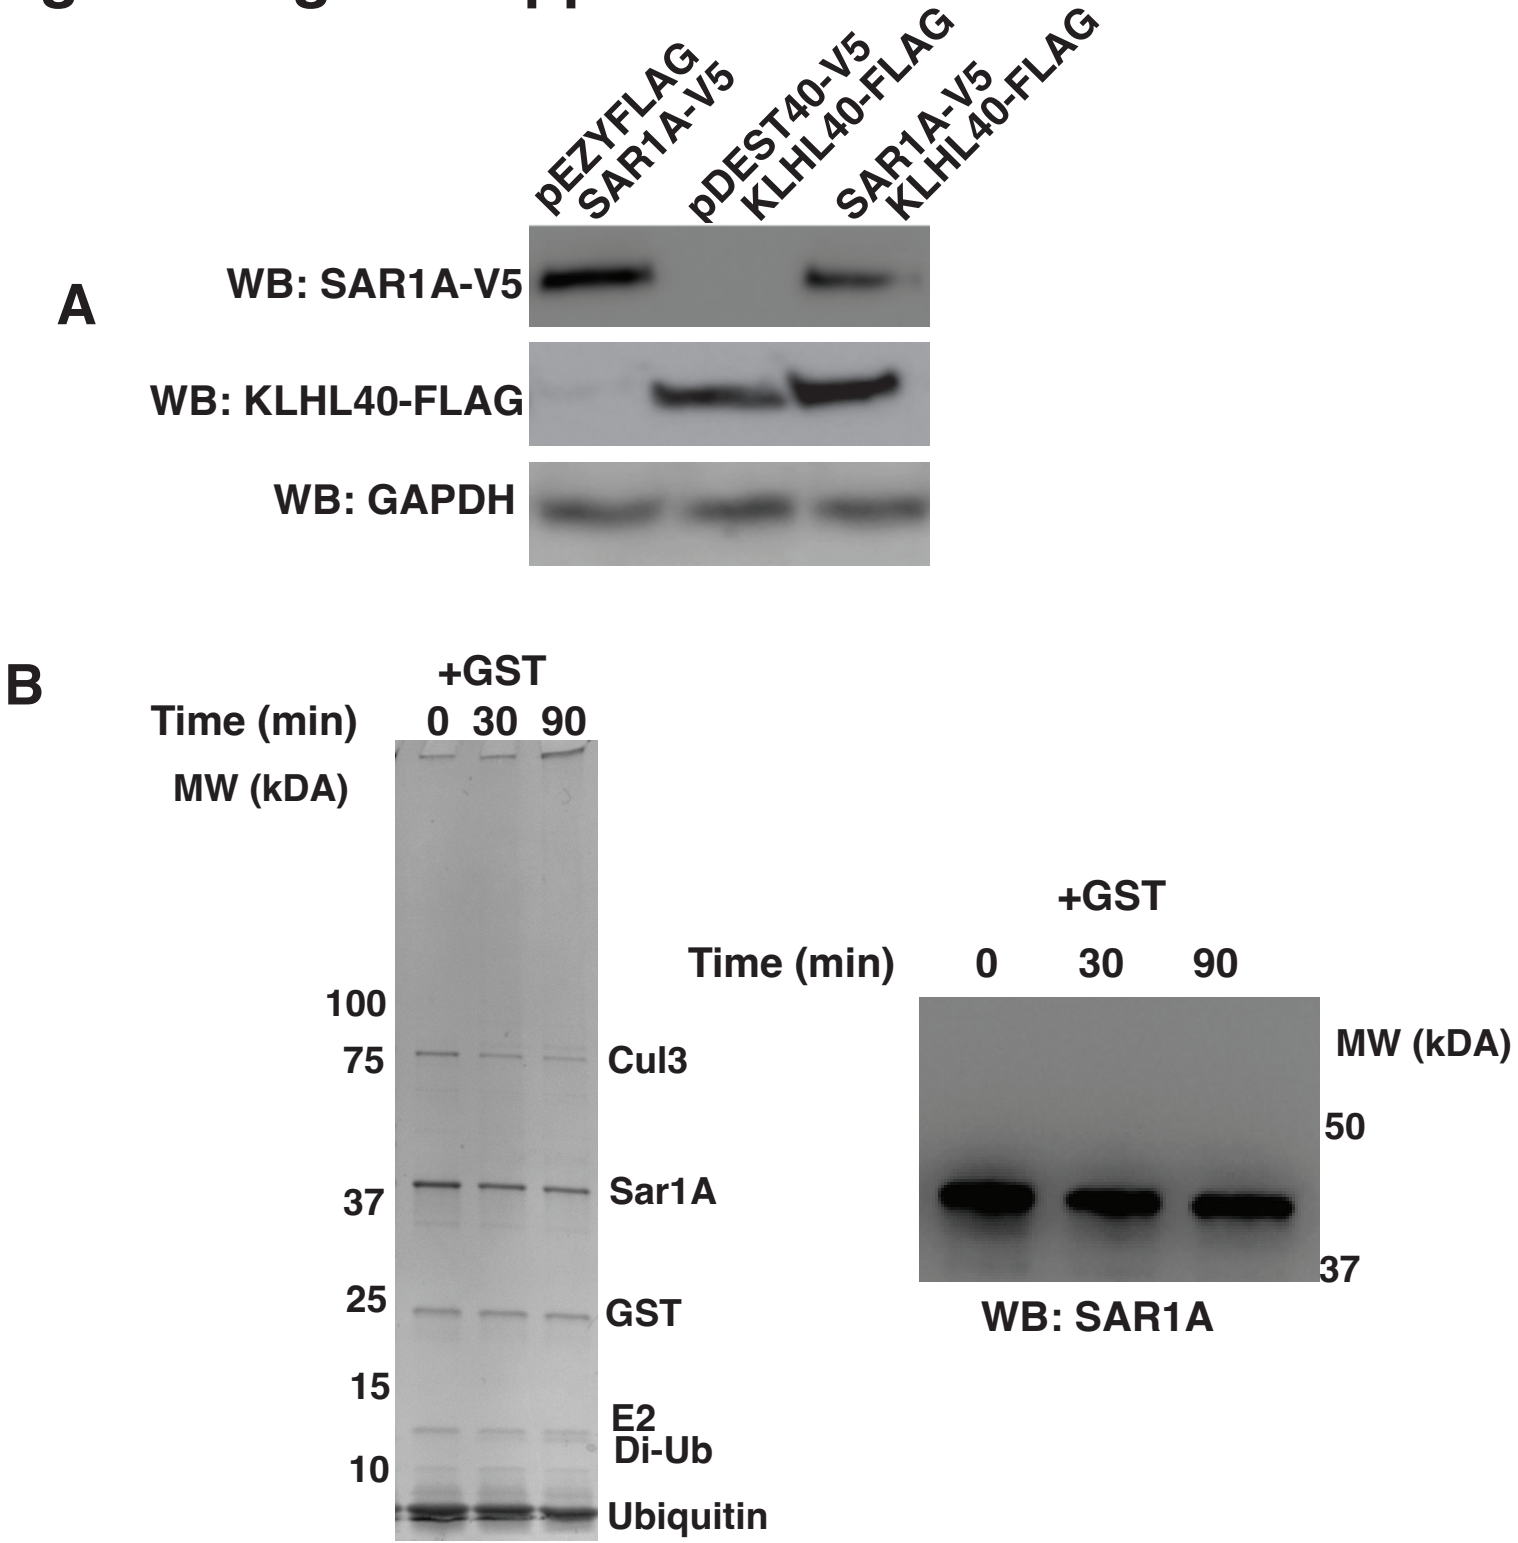

Supplement: supp [file elife-81966-supp-v1.zip]

Figure 4-figure supplement 1

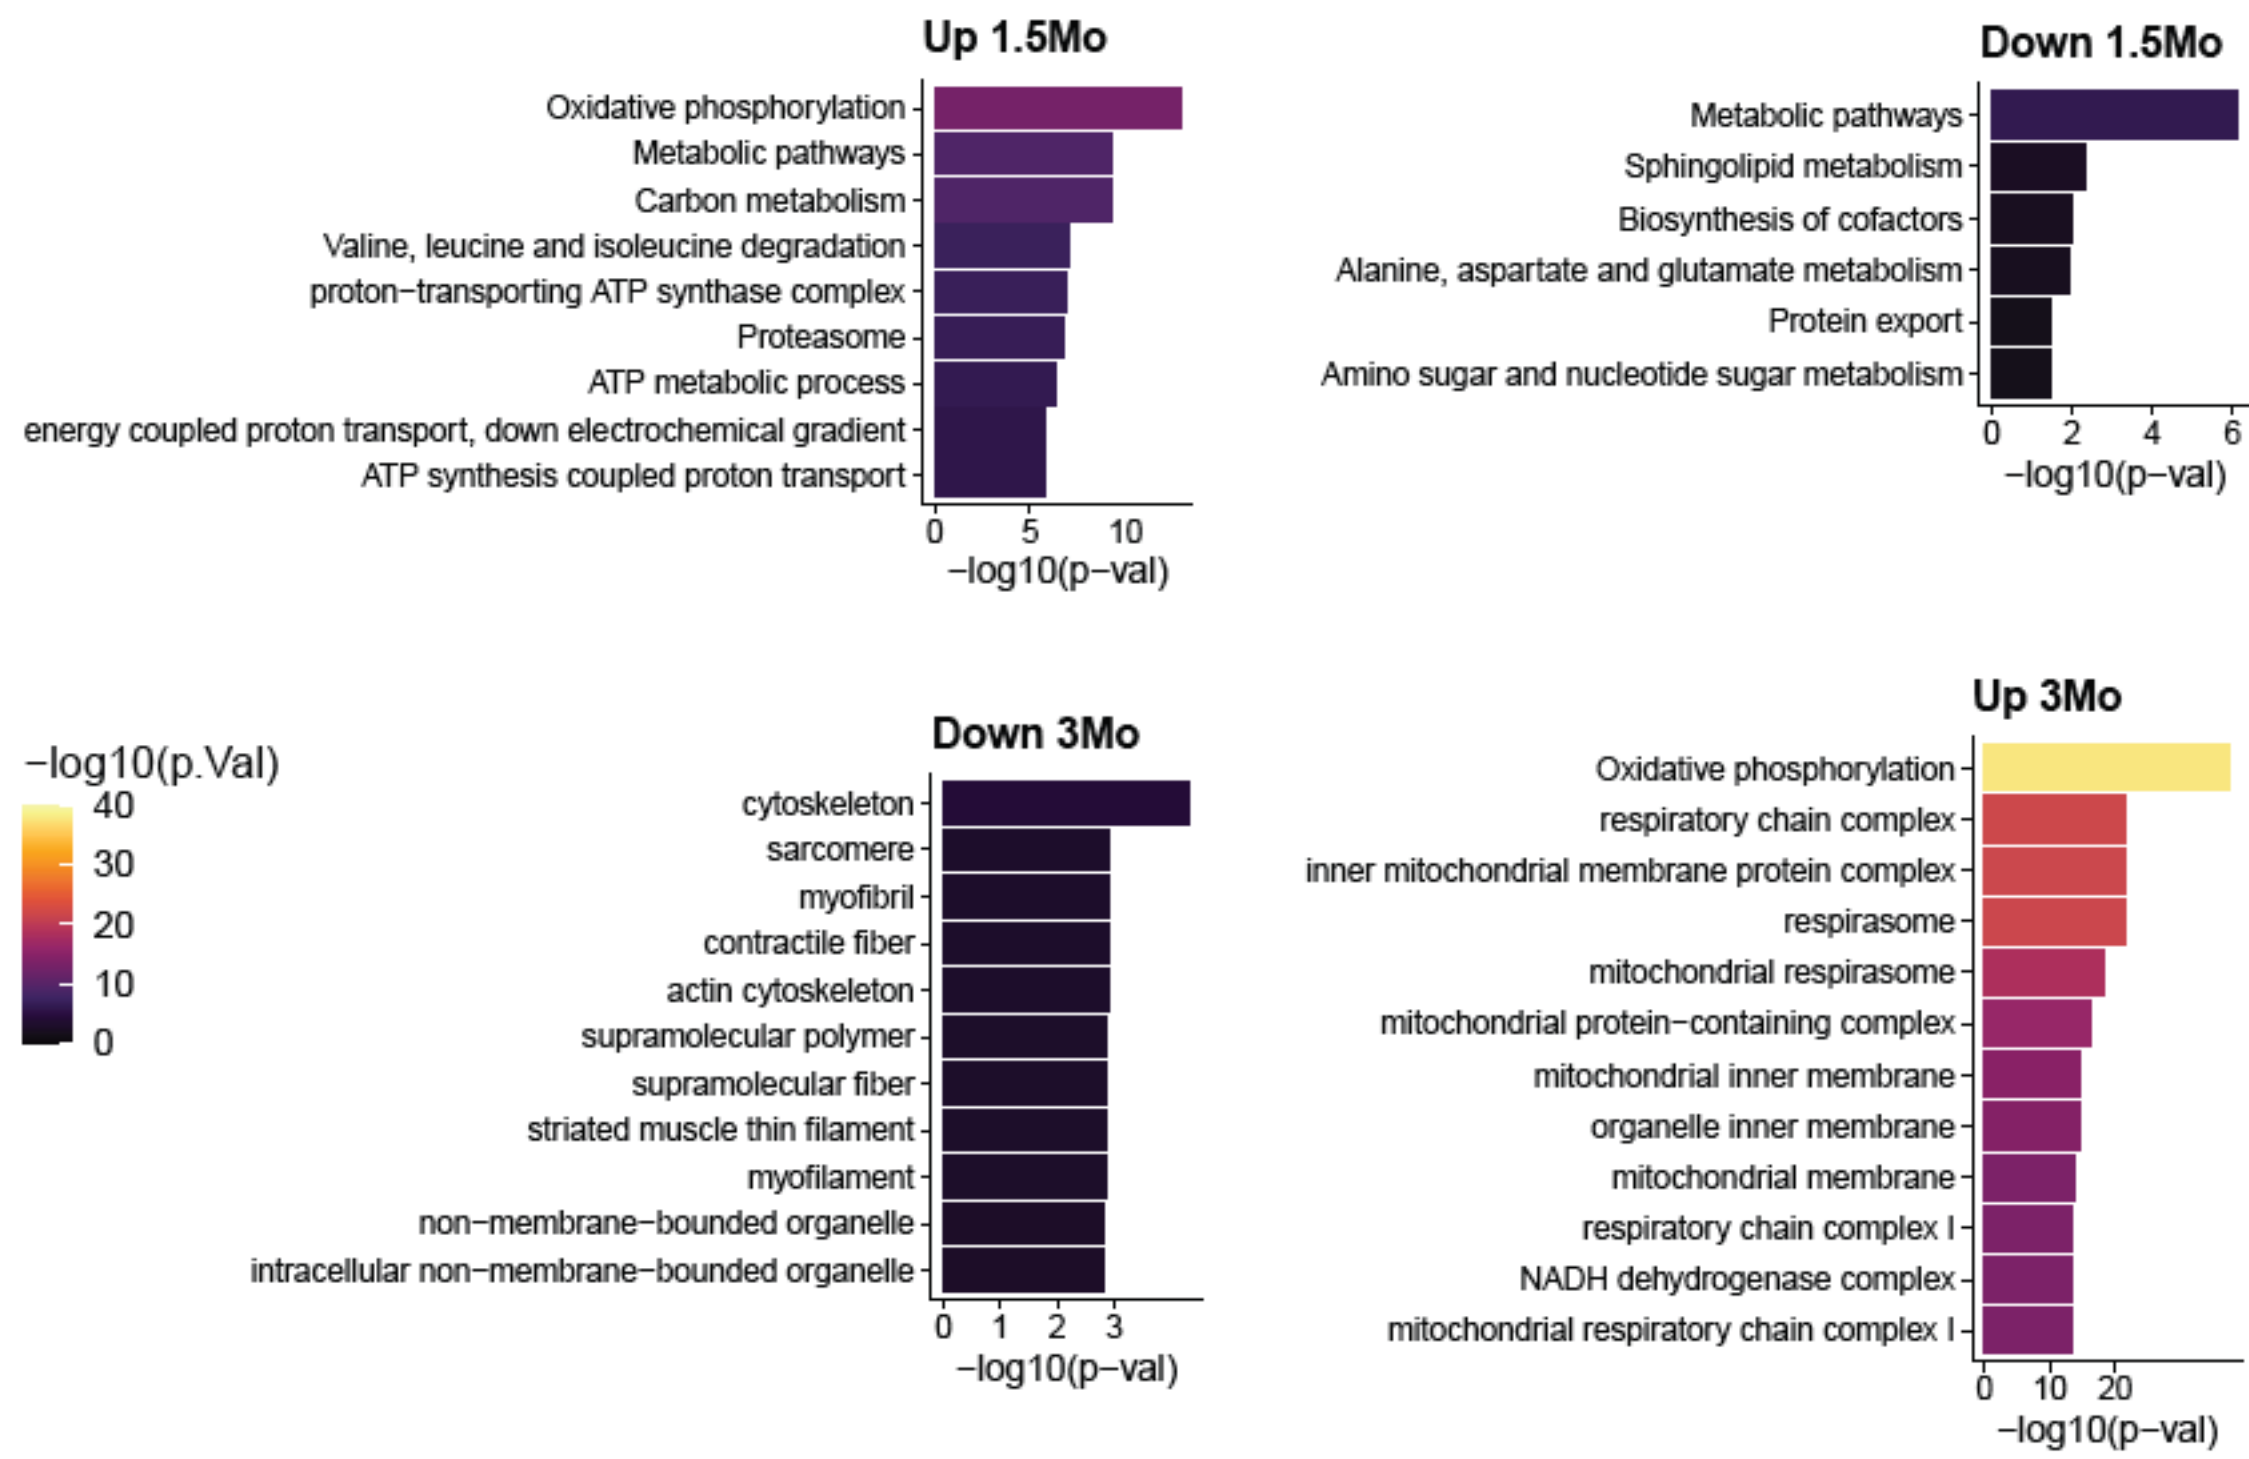

Supplement: supp [file elife-81966-supp-v1.zip]

Figure S1

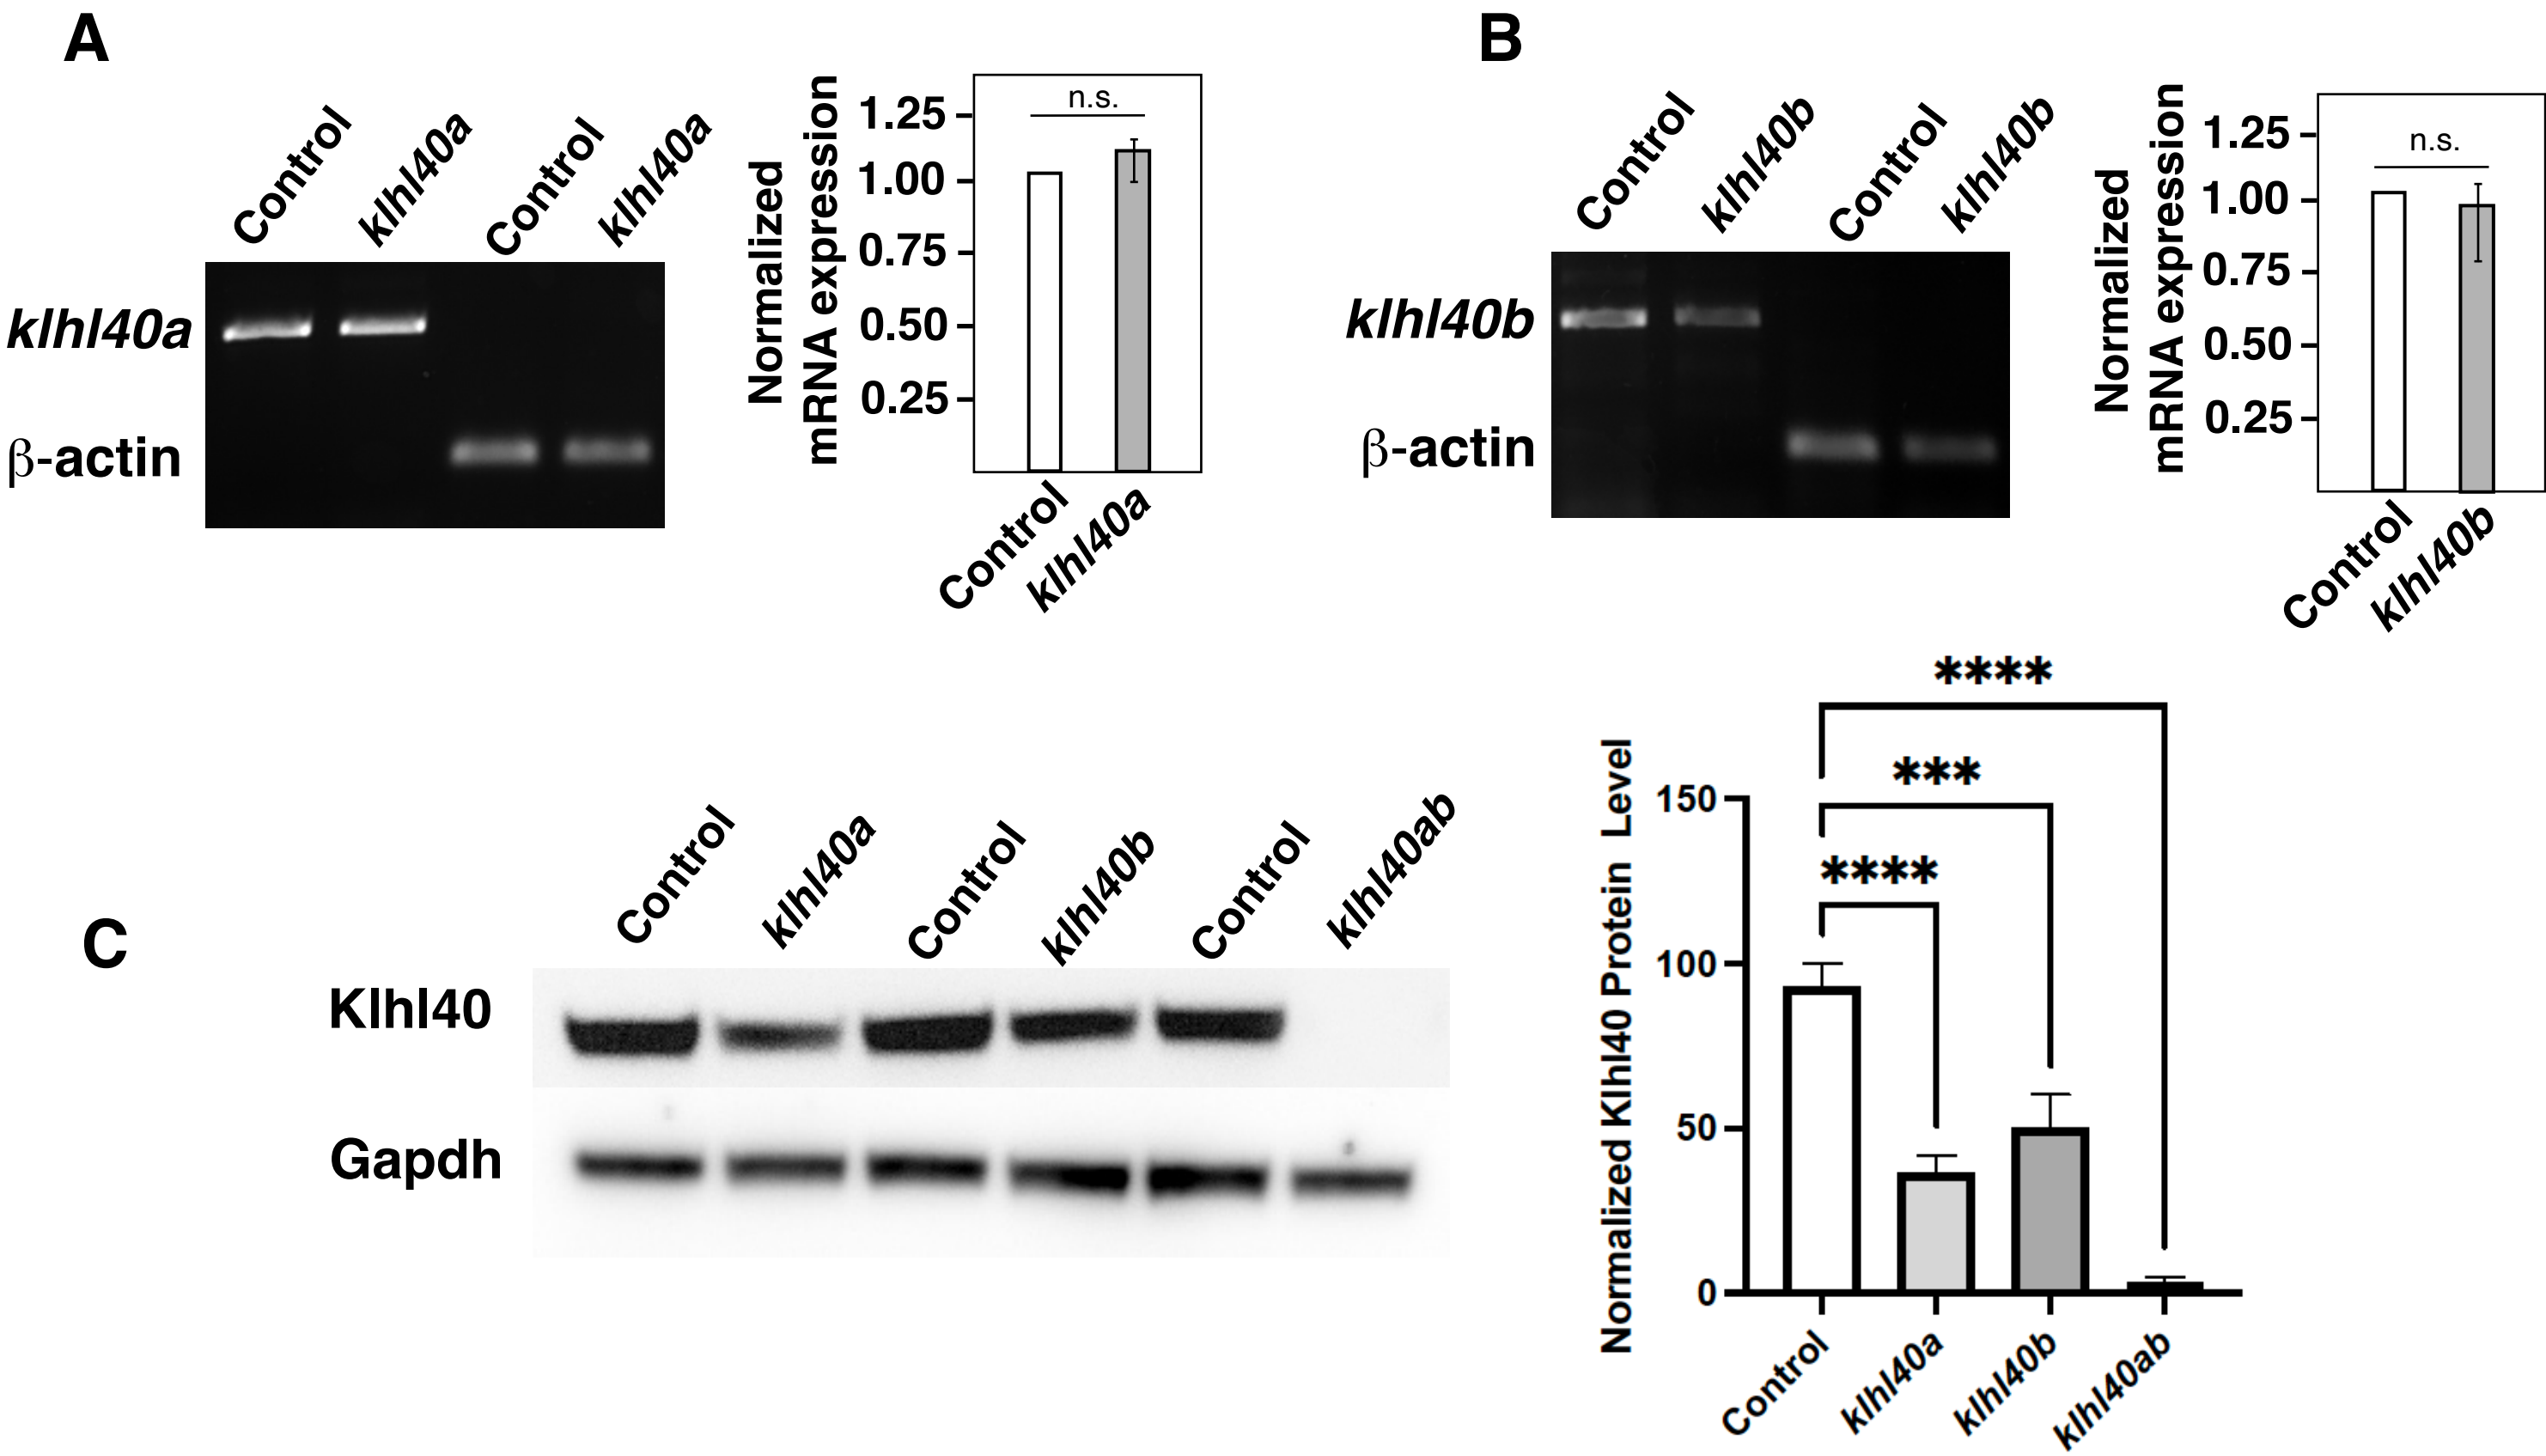

Supplement: supp [file elife-81966-supp-v1.zip]
